# Supplementary material for: Cell type–specific analysis by single-cell profiling identifies a stable mammalian tRNA–mRNA interface and increased translation efficiency in neurons
Source: HighWire-hosted journal article supplement (doi:10.1101/gr.275944.121), 2021-12-02
Supplement: Supplemental_Table_S1.xlsx [file Supplemental_Table_S1.xlsx]

## Sheet: Sheet1
# Table S1. List of publicly available datasets analyzed
Dataset name	Accession	Corresponding publication (doi)	Organism	Assay type	Tissues included	Notes
Tabula Muris Consortium (Schaum et al. 2018)	GEO: GSE109774	10.1038/s41586-018-0590-4	Mus musculus	scRNA-seq	FACS (18 tissues): Bladder, Brain Myeloid, Brain Non-Myeloid, Fat, Heart, Kidney, Large Intestine, Limb Muscle, Liver, Lung, Mammary Gland, Marrow, Pancreas, Skin, Spleen, Thymus, Tongue, Trachea; droplet (12 tissues): Bladder, Heart and Aorta, Kidney, Limb Muscle, Liver, Lung, Mammary Gland, Marrow, Spleen, Thymus, Tongue, Trachea	FACS and droplet datasets are both available; analyses presented in manuscript use FACS dataset because the sequencing depth and the number of cell types and tissues represented are all greater; 18 tissues are in the FACS dataset, 12 in the droplet, with a total of 20 across both datasets. See more information about the atlas at: https://tabula-muris.ds.czbiohub.org/
A human cell atlas of fetal gene expression (Cao et al. 2020)	GEO: GSE156793	10.1126/science.aba7721	Homo sapiens	scRNA-seq	15 tissues: Adrenal, Cerebrum, Cerebellum, Eye, Heart, Intestine, Kidney, Liver, Lung, Muscle, Pancreas, Placenta, Spleen, Stomach, Thymus	1:1 correspondence of 15 tissues with Domcke et al. 2020's scATAC-seq atlas. See more information about the scRNA-seq atlas at: https://descartes.brotmanbaty.org/bbi/human-gene-expression-during-development/
An atlas of chromatin accessibility in mouse at single cell resolution. (Cusanovich, Hill et al. 2018)	GEO: GSE111586	10.1016/j.cell.2018.06.052	Mus musculus	scATAC-seq	13 tissues: Bone Marrow, Brain (Cerebellum, Whole Brain, Prefrontal Cortex), Heart, Kidney, Large Intestine, Liver, Lung, Small Intestine, Spleen, Testes, Thymus	See more information at: https://atlas.gs.washington.edu/mouse-atac/
A human cell atlas of fetal chromatin expression (Domcke et al. 2020)	GEO: GSE149683	10.1126/science.aba7612	Homo sapiens	scATAC-seq	15 tissues: Adrenal, Cerebrum, Cerebellum, Eye, Heart, Intestine, Kidney, Liver, Lung, Muscle, Pancreas, Placenta, Spleen, Stomach, Thymus	1:1 correspondence of 15 tissues with Cao et al. 2020's scRNA-seq atlas. See more information about the scATAC-seq atlas data at: https://descartes.brotmanbaty.org/bbi/human-chromatin-during-development/
Mouse brain 10X Genomics	NA (see "Notes" for download link)	NA	Mus musculus	scATAC-seq	Adult brain	No corresponding publication, download dataset here: http://cf.10xgenomics.com/samples/cell-atac/1.1.0/atac_v1_adult_brain_fresh_5k/atac_v1_adult_brain_fresh_5k_filtered_peak_bc_matrix.h5
Mouse brain droplet-based (Droplet-based combinatorial indexing for massive-scale single-cell chromatin accessibility, Lareau et al. 2019)	GEO: GSE123581	10.1038/s41587-019-0147-6	Mus musculus	scATAC-seq	Adult brain	Only mouse brain dataset analyzed
Bulk ATAC-seq adult mouse atlas (Liu et al. 2019)	NCBI Sequence Read Archive (SRA): SRR8119836 (adult mouse brain dataset)	https://doi.org/10.1038/s41597-019-0071-0	Mus musculus	Bulk ATAC-seq	20 different adult tissues, including brain	Only mouse brain dataset analyzed
Chromatin accessibility in fetal mouse development (Gorkin et al. 2020)	ENCODE corsortium: see "Notes" section	10.1038/s41586-020-2093-3	Mus musculus	Bulk ATAC-seq	Fetal mouse samples collected at 8 developmental stages (E10.5, E11.5, E12.5, E13.5, E14.5, E15.5, E16.5, P0). 12 tissue types: Brain (forebrain, hindbrain, midbrain, neural tube), heart, liver, intestine, kidney, lung, stomach, limb, craniofacial prominence	Datasets can be downloaded from ENCODE corsortium website at link: https://www.encodedcc.org. Refer to experiment IDs listed in Table S13 of Gorkin et al. publication
tRNA usage across mouse development (Schmitt et al. 2014)	ArrayExpress: E-MTAB-2326	10.1101/gr.176784.114	Mus musculus	Pol III ChIP-seq	Brain and liver across development (E9.5, E12.5, E15.5, E18.5, P0.5, P4, P22, P29)	Currently using P22 and P29 ChIP-seq data to compare with ATAC-seq data
QuantM-tRNA-seq (Pinkard et al. 2020)	GEO: GSE141436	10.1038/s41467-020-17879-x	Mus musculus	QuantM-tRNA-seq	Cortex, cerebellum, medulla oblongata, spinal cord, liver, heart, tibialis	Downloaded supplementary data 1, which provides isodecoder and anticodon counts from QuantM-seq
Ribosome profiling -- neurons vs. glia (Scheckel et al. 2020)	GEO: GSE149805	10.7554/eLife.62911	Mus musculus	Ribosome profiling	Adult brain	Cell-type specific ribosome profiling was performed in mice injected with control brain homogenates and prions. Only the ribosome profiling data from the control mice was analyzed. This included data for excitatory neurons, inhibitory neurons, microglia, and astrocytes for control mice 2, 4, 8, 16, 24 weeks after injection and sacrifice time.
