# Supplementary material for: Cell type–specific analysis by single-cell profiling identifies a stable mammalian tRNA–mRNA interface and increased translation efficiency in neurons
Source: HighWire-hosted journal article supplement (doi:10.1101/gr.275944.121), 2021-12-02
Supplement: Supplemental_Table_S2.xlsx [file Supplemental_Table_S2.xlsx]

## Sheet: mRNA_expression
# Table S2. Adult mouse mRNA gene expression by cell type matrix
	Heart fibroblast	Heart endothelial cell	Bladder bladder cell	Bladder bladder urothelial cell	Brain microglial cell	Brain macrophage	Brain astrocyte	Brain oligodendrocyte	Brain endothelial cell	Brain neuron	Brain oligodendrocyte precursor cell	Brain Bergmann glial cell	Brain brain pericyte	Muscle skeletal muscle satellite stem cell	Muscle mesenchymal stem cell	Muscle endothelial cell	Muscle lymphocyte	Muscle macrophage	Fat endothelial cell	Fat mesenchymal stem cell of adipose	Fat natural killer cell	Fat myeloid cell	Fat B cell	Fat T cell	Heart leukocyte	Heart myofibroblast cell	Heart endocardial cell	Heart cardiac muscle cell	Heart smooth muscle cell	Kidney macrophage	Kidney endothelial cell	Kidney kidney collecting duct epithelial cell	Kidney epithelial cell of proximal tubule	Kidney leukocyte	Intestine epithelial cell of large intestine	Intestine large intestine goblet cell	Intestine Brush cell of epithelium proper of large intestine	Intestine enterocyte of epithelium of large intestine	Intestine enteroendocrine cell	Muscle skeletal muscle satellite cell	Muscle B cell	Muscle T cell	Liver natural killer cell	Liver hepatocyte	Liver endothelial cell of hepatic sinusoid	Liver Kupffer cell	Liver B cell	Lung stromal cell	Lung lung endothelial cell
0610005C13Rik	7.81904	6.12766	2.16358	8.20739	71.2369	0	33.7099	9.92365	2.94001	2.22544	39.8407	0	17.1328	0.498395	1.43809	0	22.7959	0	10.5318	0.580898	0	7.96373	0.765104	0	1.61535	0	0	24.8159	0	9.50321	0	1031.46	33355.8	0	3047.55	313.678	1303.71	7634.77	240.446	0	0	0	703.561	48051.1	595.38	5.33676	2905.09	9.64921	16.4886
0610007C21Rik	33487.6	19882	31456.3	13605.5	35926.9	15417	40185.4	30191.1	16603.7	11209.1	35688.5	38597.9	18666.2	20808.5	33449.4	18133.9	9419.76	19107.5	19698.4	32866.6	9397.65	11259.5	11658.4	7446.75	13088.1	23432	22483.1	16272.6	18208	11993.1	20667	20859.2	34574.1	20602.5	15202.8	19458.9	2166.73	8556.85	11128.6	9350.01	13859.6	5557.36	4556.4	32131.7	31988.2	14291.8	9998.78	35938.5	28490.4
0610007L01Rik	6448.15	4828.59	7704.24	8111.25	6353.27	2010.78	3475.31	3101.32	6128.67	2824.53	4366.28	1831.36	6353.42	7330.89	7153.05	5255.53	4528.78	7448.27	6358.51	6713.69	4828.38	6331.76	8220.53	6127.01	5745.28	3701.92	5035.38	8941.98	5103.02	11841	28868.2	3235.94	5336.48	12129	4407.44	13054.4	4211.04	10160.8	7884.82	12002.8	6877.04	7557.66	8485.81	8440.35	7502.59	4402.82	3148.06	7982.97	6626.67
0610007N19Rik	7818.45	66.2992	10820.1	480.484	2.06235	6.22532	679.664	270.879	437.222	93.0236	627.323	100.941	10336.8	143.039	5676.61	140.198	129.177	2.98647	352.092	7529.27	5.82258	43.948	149.45	141.276	57.3451	5042.11	2107.7	1220.94	5447.58	0	104.012	7983.68	5662.24	1499.28	4777.05	8850.24	2221.81	803.761	5911.35	207.291	3.97977	0	0	40.7949	148.845	5.33676	0	5986.46	277.888
0610007P08Rik	1680.96	1728.6	3366.26	1133.32	1017.04	2051.24	1166.18	2787.08	1061.34	1099.81	1189.82	1461.24	945.161	958.912	1541.15	2914.79	336.872	489.782	818.794	1511.83	553.146	856.396	1555.71	904.087	1490.97	1951.03	2045.67	706.425	623.639	3715.76	1938.94	1552.24	133.694	9922.22	1546.2	1316.55	673.276	606.192	1478.97	1153.25	2051.57	4439.91	985.943	1219.66	1123.71	0	0	2489.06	669.878
0610007P14Rik	4825.07	2395.11	3858.21	4695.1	3269.64	3676.05	9463.83	8428	2773.48	6338.96	9715.74	7705.17	1365.87	1779.27	3285.07	1955.2	3480.17	3267.2	3818.08	4129.36	5486.33	2594.26	4497.28	2592.39	2472.3	2649.67	3359.06	694.844	484.103	2822.45	2123.41	1233.7	5453.23	572.76	6695.41	11774.5	4088.62	5642.56	3756.4	1368.06	4268.3	5408.08	3766.69	17000	5606.49	912.585	8926.54	4024.16	4688.71
0610007P22Rik	2150.57	862.091	1800.1	3376.99	2802.51	5406.69	3396.04	3302.49	1302.64	3430.75	4724.84	3278.18	2527.09	2634.02	895.449	755.933	3409.25	421.093	808.263	2015.47	8260.79	1654.54	1256.56	2285.71	1685.08	2625.73	2068.48	1869.46	1796.88	5654.41	22337.1	884.828	1847.24	0	2076.96	2534.04	581.466	1438.85	2554.17	2043.79	3343.01	767.709	6346.41	3303.34	474.695	3484.9	3364.62	2928.54	2800.21
0610009B14Rik	0	0	0	97.5507	0	0	0	0	0	0	0	0	0	0	0	0	0	0	0	0	0	0	0	0	0	0	0	0	0	0	0	0	0	0	384.185	413.035	0	18.7113	0	0	0	0	0	0	0	0	0	0	0
0610009B22Rik	3597.88	2331.52	2187.92	1851.35	4002.8	2910.34	5527.97	3218.57	2293.21	3967.97	5326.5	5090.31	3777.79	700.743	1230.52	832.663	704.139	1084.09	1793.5	2727.65	756.936	1707.48	959.44	403.589	1640.39	2377.7	3268.5	6766.46	5681.09	2708.42	1277.58	5882.84	10038.4	5946.59	3966.61	4474.35	446.811	3624.22	2871.74	659.448	1733.19	0	76.5781	11610.8	2832.08	1894.55	1394.44	3278.54	3420.62
0610009D07Rik	8234.04	5987.73	8276.78	23704.1	6113.1	6589.5	11032.7	7276.12	7860.55	9029.52	12520.1	17203.2	6295.36	9059.32	8869.64	7471.23	17651.6	14179.8	6977.2	8146.43	10972.7	9978.85	14401.8	11624.7	8232.92	6574.44	7525.97	7922.88	4425.27	8001.7	8507.39	8577.78	7200.67	4481	8837.14	7195.69	14567.2	9554.88	12380.7	9925.54	15976.8	14936.2	9596.2	13331.6	6207.23	13987.6	9026.9	6090.41	8585.3
0610009L18Rik	696.355	312.209	555.77	919.931	347.849	638.096	1567.51	544.943	228.061	449.095	1057.47	1792.91	3713.06	162.477	397.871	6.63099	12.6644	606.254	297.987	369.119	500.742	843.123	137.209	116.757	392.531	919.035	546.89	2076.26	2087.34	237.58	547.535	316.01	1464.99	151.613	966.917	1135.55	593.707	834.58	2127.72	402.683	350.22	767.709	0	407.949	46.9331	336.216	417.276	557.9	602.605
0610009O20Rik	2054.83	3502.91	2106.79	1030.85	2901.34	3006.83	3190.6	3727.37	4071.08	2807.18	3745.71	2888.84	3748.28	1252.96	1360.43	1788.47	288.748	32.8512	2314.93	1833.4	462.895	626.775	909.198	335.481	1659.24	3051.78	3292.03	10694	1534.89	4276.44	5595.06	4785.66	1625.05	656.989	2407.94	1520.36	930.345	721.486	1256.67	1472.02	849.681	332.674	1057.74	2649.57	4993.68	2844.49	126.767	3884.69	4762.8
0610010B08Rik	9.85594	4.01814	3.24537	1.40698	7.7338	18.676	24.1436	0.980114	9.24004	12.9076	8.1032	9.61343	12.3737	0	1.43809	0	0	0	3.30409	6.05794	0	6.04654	1.02014	8.56217	7.26909	5.52526	7.84327	6.61756	5.69533	0	0	0	0	0	13.8004	10.506	18.3621	3.57716	0	5.01005	1.98989	0	0	10.4602	6.70472	16.0103	10.564	4.82461	6.8153
0610010F05Rik	2082.03	2204.95	1175.1	640.411	792.843	949.362	1655.43	2412.55	1315.03	3386.68	1833.35	28.8403	459.731	2367.38	2883.36	2768.91	253.288	1125.9	1926.28	1571.74	1032.05	880.582	591.425	880.736	1784.43	2480.23	2196.12	1616.34	1435.22	1995.67	2712.16	1951.68	2174.89	0	1307.81	774.441	4149.83	1036.28	2018.84	1443.21	17.909	4.26505	43.0752	2439.32	917.206	1238.13	0	1619.75	1136.4
0610010K14Rik	5496	6557.4	5102.27	2878.45	9274.76	4746.81	2786.53	3283.14	7640.47	5595.66	4104.27	2297.61	2766	3827.17	5527.53	5395.73	9586.93	5972.95	6865.28	4454.66	4365.48	5947.58	6557.7	5724.59	6375	3972.05	5874.61	4248.48	4636	6101.06	5746.17	2282.86	4195.37	12028	4001.33	3017.92	2870.61	1932.49	6723.42	2755.53	7428.24	3237.17	5054.16	3266.73	7060.08	5907.79	5715.1	4057.06	13208.7
0610010O12Rik	6050.49	757.117	323.996	28150.2	43.4811	943.136	15834.1	24846.4	7695.28	12598.7	4841.66	30873.5	18623.4	6822.03	3117.77	537.11	2882.41	1224.45	1867.43	1962.61	0	480.478	894.151	140.887	134.882	33015.3	4312.37	19152.9	14471.8	0	2040.99	40494.8	49834.1	0	33836.4	24866.7	166850	118687	43420.9	4184.33	813.863	584.312	435.538	3882.83	1331.56	2172.06	0	2401.34	1559.61
0610011F06Rik	4683.34	916.436	3983.42	8207.86	1470.84	1073.87	5967.56	4307.72	2406.4	3056.43	5551.37	5095.12	4524.97	2590.16	3086.14	215.034	5663.51	2780.41	2013.43	3308.3	3925.88	1334.81	3568.44	4621.23	1640.93	2600.56	3227.86	4943.32	2548.66	579.696	219.799	24360.6	72880.4	50.5376	16769.7	10960.1	45954.2	22223.8	9286.66	2733.3	1223.78	592.842	3709.25	54716.4	2111.99	4434.84	8482.86	3523.72	3371.6
0610011L14Rik	4741.36	7100.15	2468.92	5025.27	5662.82	1743.09	3911.71	6732.16	6323.97	4437.98	8115.36	5335.45	4032.88	3744.44	2760.17	3324.97	3014.12	1415.59	5814.37	3726.46	2784.65	1607.05	6444.47	3532.28	3768.35	3630.09	9472.53	4178.99	6751.81	2869.97	7802.86	7230.31	4504.18	0	3908.63	3311.48	5716.73	2764.32	3801.77	4703.81	5380.65	4781.12	4020.35	6910.02	2189.76	458.961	5588.33	5506.63	4638.14
0610012G03Rik	5739.57	8255.56	4094.04	4528.6	6900.83	6673.55	12888.6	5826.41	6947.46	10485.8	8242.31	14179.8	6290.6	1646.7	4190.11	5088.81	6372.71	10975.3	7111.02	5487.83	3768.67	6296.51	4388.89	4073.26	7142.56	4882.49	6852.17	40339	3776	1976.67	4986.69	14445.5	13216.9	218.996	15031	11675.1	26325.1	21491	6854.98	1660.83	3020.65	2269.01	3551.31	10558.5	10267.6	7615.55	6639.45	4530.31	9348.18
0610012H03Rik	4.73085	19.0861	5.6794	45.2579	0.257793	0	0.911078	0.245028	0.630003	0	6.75267	0	0	0	0	0	0	0	0	67.4672	0	1.47476	0	0	0.807677	0	0	1.65439	0	0	0	978.367	31209.2	0	5.34208	31.5179	30.6035	16.2348	63.5141	0	0	0	0	7824.25	0	0	52.8198	0	0
0610030E20Rik	3434.93	4285.14	1845.54	2508.18	6858.16	4905.55	1137.03	7500.2	3562.25	3002.12	3040.05	1538.15	2848.81	3613.86	2322.51	879.08	5878.8	3144.76	3091.39	2988.64	3595.45	3370.57	5235.6	3158.66	5347.63	4542.38	2585.43	603.853	1460.85	12933.9	6022.88	4821.05	1960.22	4548.39	2741.6	2045.06	893.621	4490.99	1937.18	4758.92	13338.2	4776.85	3570.45	4013.59	4716.1	6142.61	8509.27	5589.96	3952.88
0610031J06Rik	24766.7	27178.7	23755.6	17812.6	41283.1	33896.9	27295.9	15505.9	22265.1	3324.81	12632.9	24966.1	9169.87	8641.67	21149	21812.2	17251.4	35960.1	18913.6	22972.4	19692	20261.5	18542.8	14212.8	27088.4	13219.5	36098.3	9223.23	9166.63	27312.2	24376.1	27333.6	35986.4	42839.1	12659	21507.8	16109.7	18389.1	11995.1	4508.11	19411.3	14287.9	20791	10608.8	36178.7	39598.7	10806.9	23308.6	35575.4
0610031O16Rik	0	0	1.89313	6.80041	0	0	0	0	0	0	0	0	0	0	0	0	0	0	0	0	0	0	0	0	0	0	0	0	0	0	0	0	242.91	0	58.2065	1.80102	0	14.5838	0	0	0	0	0	3275.1	107.276	0	0	0	0
0610037L13Rik	8503.57	5863.77	9381.56	5047.08	5706.26	2216.21	5183.58	5844.17	9089.05	3996.9	6134.8	2542.75	5393.98	8740.35	7198.59	10250.6	4412.27	5265.15	5244.21	7020.24	1305.71	2659.89	3407.01	1810.9	3489.97	7555.48	8775.91	5778.79	5288.11	2014.68	7486.9	7000.25	4982.47	488.53	4154.7	4139.36	7993.63	2371.38	3878.9	6304.21	2517.21	5536.03	1450.2	6181.99	6616.22	2230.76	2889.24	7177.26	8293.34
0610037P05Rik	7889.68	4929.65	8479.62	7038.66	6592.25	5506.3	8654.79	10813.8	6655.77	12851.9	15591.9	8224.29	6629.45	3866.55	6059.62	2194.86	6365.12	1499.21	7774.11	8649.91	10029.4	5238.07	7507.45	5929.69	3957.62	6903.5	6652.52	12576.7	7660.22	1035.85	5200.6	5614.87	7189.37	3807.17	8303.71	6361.52	569.224	7753.09	8551.72	2984.42	5533.87	8282.72	9864.22	8923.62	4028.2	6099.91	4178.04	7038.66	6708.24
0610038B21Rik	120.571	29.5333	313.719	329.703	13.4912	21.7886	0	1.10263	5.25002	52.9656	22.2838	0	269.366	73.7624	274.675	300.289	0	74.6618	34.4864	184.311	46.5807	87.4536	2.55035	64.2162	116.036	237.586	17.8256	132.351	173.708	95.0321	35.3248	63.202	154.408	67.3835	37.6172	14.108	0	12.3825	0	24.7371	0	85.301	148.37	2.09204	14.7504	53.3676	0	598.251	9.23364
0610038L08Rik	28.1223	11.753	20.8245	33.7675	39.0127	0	134.384	137.951	1.05	263.048	21.6085	0	52.3503	0	1.91745	137.356	0	0	32.8344	5.06211	0	17.8447	0.255035	168.908	76.1909	37.449	2.13907	6.61756	0	0	0	0	0	0	28.4911	29.7169	12.2414	58.6104	0	90.8072	0	0	0	10.4602	147.504	0	179.587	194.3	150.596
0610039K10Rik	29.2393	111.101	182.011	51.5893	1176.14	494.913	1.82216	26.7081	255.151	119.284	66.1761	0	138.014	139.052	83.4091	363.757	235.557	23.8918	359.32	89.1264	45.125	225.492	370.565	255.308	326.84	23.9428	9.98234	0	560.99	760.257	435.673	17.6966	5.64906	50.5376	228.597	258.447	593.707	692.319	308.497	34.7572	276.594	174.867	0	5.23011	1503.2	128.082	1420.85	134.212	573.585
0610040B10Rik	51.3166	27.6247	43.5421	125.925	151.797	0	316.144	181.689	128.101	191.388	187.724	456.638	123.737	111.64	21.5713	9.47284	258.353	5.97295	168.508	95.4333	0	93.9425	205.303	28.4108	50.076	195.84	25.6689	181.983	0	256.587	96.162	48.0335	109.215	0	114.632	132.675	318.276	383.857	63.5141	13.1514	198.989	72.5058	0	411.087	130.072	21.347	15.8459	39.0355	222.267
0610040F04Rik	9.65882	0	14.3337	16.1803	0	0	29.61	1.96023	3.15001	52.5205	0	0	0	0	0	0	0	0	0.206506	1.1618	0	15.485	0	0	0.269226	0	0	31.4334	0	0	0	0	0	0	234.273	298.07	30.6035	21.463	72.5875	0	0	0	0	24.0585	25.478	0	0	0	0
0610040J01Rik	13.3384	7.73491	7.30209	10589.9	39579.1	13866.9	2931.85	675.911	127.261	539.448	15993	19073	0	17.4438	31.1586	207.455	126.644	1409.62	57.4085	30.2897	4.36694	1310.62	1.27517	7.78379	2956.37	11.0505	4.99117	464.884	2.84766	4333.46	239.424	21824.9	3865.84	0	12000.9	16908.3	20308.5	7584.41	11750.1	6.57569	0	0	23.9307	7991.61	45.5921	2497.6	1574.03	375.881	91.0173
0610043K17Rik	261.708	365.55	213.924	35.878	143.806	0	508.837	185.977	27.5101	512.742	39.1655	0	1125.06	531.289	351.373	593	5.06575	609.241	132.37	362.812	0	62.9725	87.9869	59.1568	36.3455	155.935	437.797	26.4702	96.8206	85.5289	294.373	0	819.114	0	27.0443	35.7203	238.707	148.59	0	382.643	77.6055	0	0	325.313	209.187	0	10.564	314.038	220.068
0910001L09Rik	2398.94	1548.99	2785.61	2674.2	5444.51	7576.22	4226.95	2973.54	1899.46	2596.2	2835.45	3773.27	2137.8	726.66	2256.36	819.401	1727.42	6062.54	1717.09	2462.18	1682.73	5070.39	1435.84	1189.36	5134.94	1977.43	2026.42	6652.3	1825.35	3307.12	1316.83	2560.95	8386.97	3318.64	3360.17	3690.6	10546	4386.43	2631.3	469.692	1693.39	1207.01	2732.88	7310.65	2527.68	3949.2	3649.85	1665.81	2443.84
100043387	1078.11	528.485	753.738	404.742	598.338	0	2194.79	844.858	715.053	1931.69	1711.8	1119.96	640.577	443.073	846.554	43.5751	742.132	197.107	357.255	944.374	285.307	259.411	62.2284	446.789	638.603	1524.97	662.4	729.586	1566.22	437.148	416.048	834.267	9.4151	0	559.027	352.4	306.035	246.824	190.542	93.3122	0	25.5903	1703.86	548.116	632.926	0	1230.7	643.427	519.942
1100001G20Rik	2.29972	17.8807	0.270448	1.87597	4.94104	2119.72	5.01093	15.8043	57.5403	0.890178	4.0516	19.2269	0	0	1.91745	7.57828	12.6644	8484.57	180.486	6.63884	0	6345.77	59.4231	3.11351	948.751	0.613918	0	31.4334	11.3907	19.0064	0	10.1123	32.0113	7833.33	2.89363	2.70154	0	3.02683	0	2.81815	113.423	29.8553	593.48	131114	803.226	8255.96	3348.77	0.877201	25.9421
1110001A16Rik	1636.48	1962.66	1574.28	2337.23	7296.41	2832.52	3019.77	1557.89	2176.87	2535.67	2524.82	4196.26	1044.15	854.747	1054.12	1999.72	2641.79	1003.46	1647.71	1631.99	1643.42	1470.34	1064	1123.98	2201.19	626.196	2454.94	6781.35	395.825	2204.74	606.409	5743.8	6097.22	892.831	3729.89	3168	4284.49	2019.45	4681.89	393.289	1183.98	614.167	823.215	5310.66	1378.49	4264.07	908.5	922.816	1828.92
1110001J03Rik	3514.3	1641.41	1807.94	1677.59	620.895	329.942	8346.84	2369.06	1582.99	5807.07	3275.04	9022.21	3868.21	2287.63	2991.22	1410.51	2616.46	3604.67	1920.5	2511.89	1657.98	1697.16	1930.36	1137.99	1450.59	3749.19	1716.96	19508.6	7110.62	266.09	12911.2	18520.7	7613.05	606.451	6145.62	4236.91	2227.93	5998.63	3352.64	2295.86	1454.61	1121.71	1746.94	10743.7	1574.27	1062.01	1283.52	2286.86	2186.83
1110002B05Rik	16838.7	12590	17178.3	10422.9	10825.2	14536.1	9147.23	18700.8	19247	6792.06	14905.8	7286.98	12469.8	9418.17	14053.5	8515.14	14176.5	7839.49	14686.7	14201.1	10453	10200.1	9456.94	11853.2	15600.8	10795.7	24600.8	7694.57	10092.1	15632.8	14710.8	13368.5	11778.3	19642.3	14741.3	7209.2	4768.02	6117.77	7435.68	6045.88	7945.61	16808.6	24509.8	13120.3	19942.5	11143.1	15064.2	11619.4	18810.9
1110002L01Rik	128.981	271.224	110.072	84.8879	552.881	217.886	124.362	212.195	108.151	500.725	271.457	624.873	331.235	60.8042	58.9616	296.5	134.242	2.98647	9.91226	97.3419	161.577	66.6594	407.035	94.573	81.5754	330.902	14.9735	112.499	2.84766	9.50321	96.162	5.05616	199.6	555.914	110.737	138.979	134.655	108.416	362.938	216.998	336.291	486.215	0	238.493	126.049	0	0	56.5795	217.87
1110002N22Rik	2373.18	1143.96	765.097	1188.2	3660.67	631.87	1379.37	667.335	1171.39	1847.56	1601.73	1043.06	2313.88	1101.95	314.941	59.6789	536.97	1851.61	660.405	1161.8	2.91129	526.786	1320.31	902.919	2300.26	2525.04	1309.11	4668.69	4026.6	19.0064	1772.13	1951.68	5308.23	0	2470.27	2036.06	581.466	654.071	1175.01	711.427	1737.17	767.709	2527.08	4963.38	1108.96	1259.47	4473.84	1552.21	1571.26
1110003E01Rik	34986.9	19556.5	35527.1	62425.4	10217.8	17325.1	13919.9	24199.9	22225.5	14704.4	11643	10122.9	24600.8	12985.7	40850.8	19677.9	60285	21413	18033.9	35546.9	12908.7	15706.2	53975.5	12545.9	18797.6	20837.6	26376.9	27725.9	33924.2	23102.3	12457.9	9985.92	17975.3	15767.7	11033	98885	1817.85	14464.7	16590.8	11439.5	50348.1	6619.35	8500.17	19920.4	8795.26	13224.5	56184.4	20583.1	13403.1
1110004E09Rik	2174.81	3043.44	1492.6	2282.12	869.451	756.377	3955.45	1629.19	2349.91	3704.47	2532.93	2653.31	2429.05	1239.01	2171.03	1738.27	934.631	346.431	2337.64	2069.41	439.605	737.087	1069.1	1469.97	784.524	1307.03	2429.27	3280.66	4080.7	0	1444.39	5546.61	7654.48	4245.16	3111.21	3452.26	1609.74	1549.19	3538.64	1263.16	638.753	789.034	2862.11	4325.3	913.184	523.002	1294.08	1063.61	2469.56
1110004F10Rik	18010.9	10196.3	13214.1	14723.4	9986.87	9717.73	14645.6	14195.2	12394.3	21065.2	19396.4	26653.2	17563	14204.8	12195	10381.3	15202.3	6600.11	10728	14430.3	11575.3	8141.73	12770.3	14289.9	9270.52	14817.5	15275.8	13582.5	12227.9	6557.22	9759.46	6358.12	8752.28	1078.14	8872.98	8370.56	9034.14	5374.55	9404.62	16180.3	14150.1	14659	8887.85	9083.66	6691.32	4333.45	6554.93	15195.3	14948.6
1110005A03Rik	5911.07	3851.08	5883.86	3001.79	5991.68	1988.99	5759.38	5928.83	3280.01	4893.31	7545.43	4691.35	1969.32	6501.56	6010.25	3542.84	23180.9	6519.47	5395.99	5140.04	9224.43	6057.3	13695.1	14607.4	5316.4	2901.37	5463.91	12752	2608.46	2214.25	1964.45	10812.6	3777.34	8709.32	4856.07	5840.42	6004.4	4349.83	7413	3284.09	8723.66	12163.9	12319.5	10636	4059.04	9776.94	9475.87	4852.24	5719.14
1110006O24Rik	83.6441	249.928	73.0209	201.667	983.095	0	359.876	133.418	94.9204	134.417	234.993	322.05	13.3255	51.8331	126.072	237.768	2046.56	176.202	121.838	86.6368	165.944	67.9867	72.6849	191.87	509.644	0	0	33.0878	0	0	716.309	366.572	73.4378	0	159.038	281.86	716.121	264.71	208.689	5.63631	1.98989	238.843	0	120.293	61.6835	0	607.427	0.438601	166.205
1110007C09Rik	4964.04	5520.32	4659.54	4320.37	6857.09	6194.2	1459.09	9546.18	10818.4	830.981	2529.55	725.814	5423.49	2198.92	5174.72	5355	4751.67	51651.1	8047.11	4546.61	16441.5	20869.8	3207.06	4384.61	10792.7	4706.29	3851.05	17880.7	9434.31	8267.79	8982.31	6249.42	6053.91	2088.89	2877.27	3588.84	17052.3	14636.1	8211.46	1355.84	3969.82	4243.72	4637.76	1618.2	4142.18	9061.81	2968.47	4803.55	14198.9
1110008F13Rik	6502.82	4196.64	6884.79	21485.5	9557.82	10415	11847.7	7952.15	6126.15	4883.07	7579.87	18284.7	10531	5162.37	6753.26	2626.82	8434.47	11276.9	5876.11	6918.99	12953.8	13729.2	6526.84	7839.83	8640.53	9105.01	9083.22	8736.84	11609.9	9873.84	4203.65	5571.89	12625.7	13982.1	12323.7	13062.8	6598.11	4691.04	4913.27	4344.65	8614.21	11391.9	7250.99	22707.1	8871.69	24735.9	4954.5	8030.78	9485.8
1110008J03Rik	1698.11	973.795	2072.44	591.167	1442.22	3.11266	5168.09	1020.79	1094.32	2804.06	2114.94	730.621	1446.77	1588.38	1379.61	759.722	20.263	1445.45	927.416	1615.06	381.379	485.64	745.976	804.844	865.561	1493.05	1501.63	648.521	2944.49	2698.91	349.323	1724.15	935.861	0	2092.65	5192.95	838.535	2028.53	861.977	1216.82	495.481	51.1806	95.7227	529.287	710.701	0	5.28198	3159.24	1855.52
1110008L16Rik	478.933	410.854	575.242	1222.9	971.666	1490.96	253.735	316.332	2240.92	400.135	704.303	28.8403	265.559	372.799	153.875	131.673	43.0589	62.716	787.199	617.495	331.887	578.698	534.297	315.243	565.374	13.5062	867.038	1434.36	42.715	19.0064	64.7622	3761.78	894.435	0	2123.14	1766.2	4492.59	520.615	1338.33	104.272	11.9393	776.239	722.706	2697.69	1.34094	117.409	0	394.302	173.68
1110008P14Rik	1962.25	929.897	1943.71	4064.3	269.566	1802.23	2978.77	1787.73	2748.28	7628.82	1679.39	2143.8	1935.06	960.905	1764.53	1258.94	4336.28	3111.91	2568.93	1994.97	3263.56	2426.43	2442.47	2100.84	1587.09	1997.69	1639.24	4542.96	891.319	2641.89	1144.13	5991.55	5598.22	3773.48	1521.94	2503.72	25456	5002.53	2350.02	567.075	3050.49	1514.09	3972.49	6557.51	301.713	4995.2	5947.51	1433.79	1967.42
1110012J17Rik	91.9888	91.3121	490.322	1099.56	0.472621	0	1064.59	163.434	299.251	7756.12	1537.58	1576.6	1895.08	39.3732	406.499	20.8403	0	0	93.7535	388.953	10.1895	3.09701	0.765104	49.8162	0	440.793	116.223	97.609	1144.76	0	21.5874	1582.58	1.88302	0	783.617	564.921	624.311	189.039	4731.8	25.6765	0	0	0	0	0	0	0	256.581	149.937
1110012L19Rik	3962.15	1975.32	2480.55	2841.4	1751.4	1431.82	1778.42	1676.97	2082.58	1177.71	1722.61	2364.9	830.942	3756.4	1418.91	1976.98	5498.87	737.659	1821.59	3422.32	2659.47	1384.36	2794.67	1988.76	1396.2	1665.56	3103.8	3331.94	2579.98	2575.37	1734.84	2265.16	2547.73	0	2464.04	2851.32	1695.43	1662.01	1991.62	2466.2	3348.98	2861.85	0	5008.35	1154.55	1029.99	2450.84	2827.66	2829.89
1110014N23Rik	4837.29	4883.84	4504.04	7014.27	6985.38	10113	6583.45	7817.88	3553.64	6849.47	7163.23	10675.7	3702.59	3195.21	3512.29	3472.74	1557.72	3174.62	4150.97	4926.35	2767.18	6456.23	4658.72	4878.49	7219.29	3986.78	4294.55	1890.97	3308.99	1995.67	6230.9	4780.6	13764.9	0	6102.44	7198.1	12559.7	5709.15	3974.17	3451.61	5030.43	3019.65	2862.11	6388.06	4706.72	2134.7	7526.82	3892.58	3594.52
1110017D15Rik	16.7551	4.5204	10.5475	0	0	0	1859.06	5.88068	2.94001	152.22	130.326	1201.68	0	0	51.7711	0	0	0	1.44554	20.2485	0	36.1317	0.765104	0	0	0	0	0	0	0	0	0	0	0	40.956	0.900512	6.12069	4.953	9.07344	41.3329	0	0	0	0	0	0	0	0	21.765
1110017F19Rik	90.6746	34.1542	20.8245	2782.31	225.698	0	147.595	81.2269	79.3804	54.7459	107.367	0	310.295	18.4406	16.2983	3.78914	0	522.633	24.5742	37.1775	7.27823	109.575	93.8527	1.16757	104.729	1.22784	63.4592	1.65439	1252.97	0	37.2873	4049.99	39.5434	0	14160.4	44922.1	16409.6	6143.64	10756.6	278.058	1444.66	0	0	609.831	281.598	0	480.66	80.2639	275.03
1110018G07Rik	922.582	1496.76	804.041	776.654	2142.74	407.759	2249.45	2174.75	787.714	4802.95	2412.73	8450.21	437.839	734.136	685.009	810.875	901.704	146.337	2337.23	1261.96	2352.32	1265.5	642.942	1963.46	1412.09	1785.27	557.585	3988.74	404.368	646.218	2194.06	6661.49	33.8944	2627.96	870.203	2258.79	2864.48	2388.99	3007.84	795.659	1581.96	290.023	1124.74	2758.36	4628.94	2412.21	4663.99	1893.88	482.348
1110018J18Rik	6544.74	4402.27	7276.94	2514.74	1359.86	1556.33	928.844	1072.49	4037.69	993.883	1158.08	1946.72	5029.44	2715.26	4374.18	2695.97	813.053	961.645	3166.35	3451.53	1374.13	1621.5	2457	2717.32	2061.19	5350.91	5502.41	3667.78	5934.53	114.039	4197.77	2333.42	5549.26	471.684	2686.18	2392.96	1034.4	1344.46	3860.75	2503.77	1960.04	2849.05	1512.42	6385.97	1894.76	816.524	2556.48	5089.52	5351.55
1110019D14Rik	447.854	268.813	324.267	130.146	962.901	224.112	749.817	393.026	369.392	340.048	473.362	769.075	552.058	685.293	240.64	360.915	2.53288	752.591	483.223	489.116	346.444	188.475	128.537	171.243	720.986	284.858	505.534	1480.68	17.086	418.141	1652.42	740.728	1638.23	0	716.73	917.022	5257.68	1117.73	149.712	37.2622	240.776	0	1435.84	471.756	87.1614	245.491	0	335.529	270.194
1110020A21Rik	99.1507	97.038	97.0907	45.4924	70.0339	837.306	240.069	214.277	173.461	123.29	10.8043	168.235	195.124	0	7.19044	35.0495	0	0	35.7255	118.835	0	12.683	0	77.4487	66.4988	15.9619	18.5386	72.7932	142.383	0	0	0	0	0	347.792	260.248	532.5	586.655	68.0508	0.626256	73.6258	0	0	776.149	0	16.0103	559.89	105.264	180.056
1110020G09Rik	784.73	835.471	1241.36	1600.91	1370.6	1752.43	14523	3650.19	956.134	935.132	3015.07	25398.7	686.265	810.888	644.263	345.759	542.035	1881.48	950.545	1118.73	272.206	674.115	1845.43	697.427	1204.79	556.823	1010.36	4802.7	341.72	237.58	5.88747	10387.9	5069.09	505.376	1821.09	924.826	159.138	842.835	2141.33	954.415	362.159	4.26505	43.0752	15605.6	387.533	1446.26	528.198	1301.33	357.034
1110021J02Rik	1327.73	1284	778.078	301.563	993.45	1104.99	1717.84	1356.35	1285.42	2301.55	1430.22	610.453	1082.22	654.891	1080	473.642	767.461	424.079	915.645	953.835	136.831	1210.34	925.52	694.314	755.986	471.489	1053.14	2013.39	2503.1	5074.71	264.936	1815.16	1457.46	0	1129.52	1587.9	4970	998.579	4341.64	128.069	465.633	2938.62	291.954	2268.82	2421.75	1344.86	184.869	791.674	1520.03
1110021L09Rik	1224.44	395.585	674.226	560.447	1567.34	354.843	1565.23	348.43	379.892	1101.15	1612.54	922.889	468.297	380.275	429.509	316.393	0	86.6077	480.745	632.515	0	126.682	0	0	159.112	572.785	587.532	335.841	794.498	0	533.797	1534.54	770.155	0	1101.58	628.257	3898.88	805.687	821.146	100.827	0	0	0	304.392	827.363	0	21.1279	860.534	471.575
1110028C15Rik	1184.55	1662.91	2064.6	966.596	2091.09	1531.43	2907.25	1303.18	1528.39	1339.72	1328.93	4503.89	1712.33	927.513	1610.66	2510.3	813.053	1988.99	1021.38	939.644	283.851	1685.36	847.735	665.125	1178.67	2654.58	741.545	1057.16	1762.7	950.321	1102.92	530.897	6326.95	0	887.565	648.369	1560.78	770.191	2545.1	1436.95	624.824	2443.87	296.74	948.742	2054.33	965.953	2498.38	1664.93	2168.15
1110028F11Rik	0	0	15.686	21.3392	0	0	67.8753	40.7972	0	19.5839	1.35053	0	0	0	0	0	0	0	0.206506	0	361	0.294953	1.53021	4.28108	0	0	0	0	0	0	0	0	0	0	346.345	237.135	195.862	58.3353	1528.87	0	0	0	0	685.145	0	0	0	0	0
1110028F18Rik	0	0	0	17.5873	0	0	0	0	0	0	0	0	0	0	0	0	0	0	0	0	0	0	0	0	0	0	0	0	0	0	0	0	0	0	172.616	189.408	0	181.61	0	0	0	0	0	0	0	0	0	0	0
1110031I02Rik	1264.25	2209.37	2363.71	3142.96	3663.72	6100.82	4560.4	3809.33	2753.74	896.409	3993.53	2158.22	3235.25	1380.55	1537.32	2156.97	2598.73	1382.74	2765.32	1681.2	52.4033	1192.35	2394.52	925.103	2105.61	2364.81	6629.7	5944.23	1546.28	0	2213.69	7488.17	2502.53	16424.7	2363.32	3442.36	104.052	2607.2	1959.86	418.026	1285.47	669.612	2282.99	2080.54	4061.72	603.054	1283.52	2196.07	2984.88
1110032A03Rik	2749.48	687.905	2848.36	2801.53	2212.38	258.351	5258.29	5241.65	2588.68	3828.65	2243.24	10219.1	3637.87	1928.79	2415.03	212.192	661.08	2162.21	1823.86	2212.48	145.565	1798.62	820.956	349.103	2031.58	3799.54	3646.41	3484.15	2990.05	1596.54	881.158	3840.15	7597.99	0	3150.61	5625.5	4137.59	5199.54	5679.97	462.177	903.408	690.938	1172.6	11549.1	2440.52	4098.63	855.68	1695.19	2107.47
1110032A04Rik	3.81096	4.11859	101.959	143450	5.19883	0	312.955	3.67543	31.5001	276.4	85.0836	4.80672	1.90365	204.342	112.65	4.73642	0	0	3.30409	5.64301	1.45565	3.68691	1.27517	4.28108	3.49993	4.29742	2.13907	0	0	0	1067.59	0	13.1811	0	1984.47	66.6379	630.431	52240.1	13.6102	1.87877	3.97977	0	0	0	0	0	0	58.7725	1.09924
1110034A24Rik	1859.82	1145.77	1533.17	576.862	1510.37	3644.93	1268.22	1660.56	678.933	2508.08	2043.36	0	1090.79	959.41	1253.05	2781.23	2563.27	125.432	663.709	1269.18	7426.71	351.584	1823.75	1551.31	1168.71	2745.44	912.671	284.555	0	1349.46	2223.5	0	472.638	20787.8	2505.99	1442.02	6500.18	334.052	802.999	480.339	1778.96	1100.38	1799.59	1395.39	643.654	528.339	2118.07	1564.93	1639.19
1110034B05Rik	1047.29	1677.17	1179.96	866.231	604.525	1964.09	2137.85	1649.04	1024.59	1037.5	3045.45	605.646	1122.2	540.26	736.78	723.725	742.132	286.701	1073	1109.52	17.4678	829.408	489.921	712.217	651.795	799.321	1524.45	1015.8	697.678	617.709	1.96249	3314.31	826.646	0	720.736	702.7	116.293	463.38	186.005	1334.24	153.221	818.889	2680.23	2170.5	972.185	1883.88	628.555	845.622	1498.49
1110034G24Rik	2635.22	1867.43	1002.28	233.559	2868.51	4600.51	2508.2	1832.44	14065.4	3039.07	4707.29	4258.75	3966.25	407.687	1058.91	541.847	2337.84	2377.23	1828.4	1193.25	551.69	1744.2	1379.74	3944.82	2546.07	2941.28	2637.48	5360.23	2614.16	4533.03	231.574	0	288.102	0	1152.55	1533.27	4712.93	1048.11	952.711	343.188	83.5752	1450.12	4293.16	1746.86	1028.5	373.573	787.015	2771.52	5171.28
1110035M17Rik	79.176	103.266	136.306	25.3257	644.226	295.703	197.248	137.216	25.4101	128.631	146.533	182.655	1.90365	0	6.71107	0	0	427.066	3.09758	63.2349	0	134.499	0	0	169.074	0	59.8941	49.6317	0	0	0	0	0	0	4.34044	49.5282	0	1.37583	0	74.8376	0	0	0	166.318	230.643	0	0	43.4215	10.5527
1110036E04Rik	14.324	12.1549	279.373	12.1938	0	0	0	0	0	0	0	0	0	0	0	0	0	0	14.6619	146.552	0	0	0	0	0	0	24.9559	0	0	0	0	0	0	0	68.7793	21.012	0	26.6911	0	0	0	0	0	0	0	0	0	100.44	41.1117
1110037F02Rik	1970.66	2538.66	1820.65	1454.35	1866.77	3965.53	2252.64	1333.81	2424.46	1359.75	1172.26	1225.71	3098.19	2958.47	2581.85	4740.21	2489.82	489.782	2452.25	2146.92	2097.59	2196.66	2635.78	2515.72	1951.08	1833.77	1619.28	1712.29	4029.45	3326.12	2290.23	1878.36	171.355	6317.2	1075.65	1175.47	1285.35	1974.59	2681.2	2088.56	2590.83	1676.16	6040.1	1524.05	3637.98	4685.67	2023	1603.96	2517.7
1110038B12Rik	722.375	535.618	3638.33	1397.37	927.583	582.068	1266.85	1858.54	2005.93	2618.9	901.481	793.108	2151.12	8004.72	4297.96	8086.02	1190.45	6842.01	4298.21	3084.24	131.008	1975.45	2228.75	1766.14	909.983	1562.42	1013.92	1548.51	8.54299	2508.85	4374.39	42.9774	6451.23	572.76	9723.26	6976.27	2423.79	12791.4	5312.5	8475.44	2447.56	1283.78	1670.36	1635.98	308.417	1174.09	401.43	517.549	594.25
1110038D17Rik	2132.76	1227.24	896.805	856.617	2009.11	4538.26	1340.2	851.106	996.455	967.178	2220.28	0	5015.16	329.439	768.418	423.436	962.493	2404.11	855.965	1682.86	1084.46	2596.03	6809.93	1805.06	3389.55	2361.13	1406.8	2966.32	253.442	636.715	215.874	6454.19	19562.7	0	5663.39	2706.34	1456.72	25803.2	3375.32	1149.18	2662.47	307.083	2153.76	22897.4	1226.96	587.043	9359.67	2243	1075.28
1110038F14Rik	4057.03	4779.37	2465.94	1859.33	2577.93	1827.13	2681.76	1965.25	4178.18	2253.48	4105.62	1119.96	2555.65	2306.07	1788.5	4706.11	2808.96	1815.78	5230.16	3247.05	2059.74	1862.78	2628.13	2795.94	2311.57	2356.22	3739.1	1556.78	5347.91	3145.56	4203.65	1370.22	647.759	336.917	2264.04	2412.77	3709.14	3325.66	4296.27	2556.69	3840.48	7195.14	2957.83	1271.96	9469.75	3554.28	4595.32	3726.79	10994.2
1110046J04Rik	1154.66	52.738	460.302	140.933	31.7086	0	285.167	296.239	71.1903	103.706	353.165	821.948	537.78	276.609	724.317	145.882	0	32.8512	56.789	803.631	1.45565	53.9764	0.255035	5.05946	57.3451	1507.78	466.318	21.5071	5.69533	0	0	0	0	0	55.8693	90.3514	104.052	37.4226	40.8305	139.342	0	486.215	0	21.9665	337.918	1259.47	0	1291.68	295.916
1110049F12Rik	3879.1	2604.86	4796.66	5564.61	6746.92	4155.4	8007.92	28285.6	6683.91	11227.4	10254.6	14598	4748.65	3543.59	2964.86	5819.17	8862.53	4882.88	4070.02	3708.37	6512.56	5435.39	6417.43	6252.72	5448.05	4255.68	4147.66	3854.73	4747.06	8343.82	5027.9	2662.07	4180.31	1179.21	6691.63	17238.8	3617.33	6448.8	9332.03	4386.93	13535.2	5147.91	5738.57	8413.16	4488.14	2849.83	4283.68	5475.49	4556.58
1110050K14Rik	0.197119	0	4229.8	2.57947	1.246	0	0	98.3789	1384.54	0	300.494	0	0.951824	0	0	0	0	0	126.794	189.041	0	0.147476	1.53021	1.55676	0.269226	0	0	0	0	0	0	0	0	0	0.779054	1.80102	36.7242	9.90599	0	0	0	0	0	0	0	0	0	1596.51	22174.8
1110051M20Rik	4815.48	417.786	4382.34	2262.19	2926.17	1101.88	10606.3	9943.62	1306.63	8985.45	8169.38	2720.6	2371.94	5341.3	5737.01	1450.29	37.9931	1747.09	1786.89	4441.88	1.45565	870.259	609.278	766.314	2031.58	4749.88	3750.51	1990.23	3887.06	1206.91	3371.56	1840.44	1325.65	3824.01	1697.45	903.214	4804.74	307.086	3860.75	5160.98	15.9191	746.383	14.3584	247.907	544.424	1675.74	697.221	6945.68	3191.1
1110054M08Rik	241.733	85.4858	221.497	371.912	144.192	136.957	1850.86	173.48	371.282	61.4223	213.384	547.966	264.607	17.4438	193.183	249.136	65.8548	104.527	268.251	255.844	363.912	87.4536	197.397	142.054	102.306	208.732	139.04	1139.88	42.715	152.051	25.5124	720.503	715.548	0	687.46	547.812	324.397	764.963	558.016	30.9997	270.624	140.747	258.451	1385.98	281.598	160.103	343.329	189.475	317.901
1110054O05Rik	1753.5	2162.66	481.938	1352.11	4919	8320.14	1739.7	1882.92	1666.99	2683	2711.2	1249.75	2113.05	448.555	718.564	1704.16	3695.47	779.47	1668.36	916.076	934.525	2433.8	3753.34	2362.38	2273.07	1975.59	1445.3	1364.87	2955.88	4323.96	2025.29	556.178	295.634	0	1886.53	1287.73	1891.29	2169.96	698.655	1170.79	6156.71	6508.46	1785.23	642.258	1599.75	1056.68	1964.9	931.588	2458.13
1110057K04Rik	4460.4	2552.62	5684.54	2638.09	7035.22	8597.17	5740.7	18723	3084.07	5740.31	9442.26	6258.34	4271.78	2709.77	4213.6	2094.45	1458.94	4864.97	3778.64	4914.4	6141.37	4823.96	4798.22	4903.01	6005.35	4396.26	3451.04	6490.17	4935	3934.33	1748.58	2588.75	2655.06	0	7391.44	7631.24	4517.07	5195.97	15842.2	2122.38	6831.28	9515.32	4274.02	9338.89	3316.16	5571.57	7532.1	5806.2	3262.33
1110058L19Rik	2767.88	2289.53	2950.04	2834.6	2426.09	2032.57	3983.23	1589.74	3016.24	4596.43	3023.84	6791.89	884.244	836.805	1729.06	697.201	3849.97	815.307	2221.79	2959.68	1650.7	1989.16	2008.14	1574.27	2517.8	1817.81	6368.02	15483.4	1987.67	931.315	1799.6	5190.15	4217.97	2830.11	2250.91	3011.91	5924.83	3327.59	3062.29	149.988	825.802	895.66	1928.81	12845.2	1875.98	2444.23	5149.93	2100.02	3676.75
1110059E24Rik	6338.55	5430.11	4548.39	4333.5	3499.85	968.038	5222.76	3243.07	4230.89	5937.93	2793.58	6642.88	8136.19	3579.97	3468.67	3800.51	7859.51	869.064	6538.38	4031.6	608.46	2034.14	12109.6	3349.36	3274.86	8624.93	6190.48	4486.71	1842.44	5055.71	3685.56	6835.93	3747.21	0	6332.15	7587.42	3213.36	13649.4	1792	2660.65	6035.32	4461.24	1459.77	5302.29	5811.66	1526.31	10664.3	3897.41	5946.46
1110059G10Rik	2083.94	2198.32	1304.1	1017.25	2732.48	420.209	1424.02	1442.85	1962.67	2818.3	2182.46	2119.76	1774.2	2044.91	1169.16	2243.17	1527.32	818.294	1978.32	1935.55	2371.25	1345.13	3321.32	1462.57	1728.97	1274.49	2274.55	1661.01	1742.77	788.766	773.221	4029.76	2071.32	589.605	1489.66	1573.5	2160.6	1462.78	1819.22	1402.19	817.843	1966.19	1392.76	1394.35	2529.02	234.817	1542.34	1953.97	2960.48
1110065P20Rik	1395.21	452.141	1682.46	760.942	530.882	277.027	2952.8	3652.39	747.183	2027.38	2197.32	2845.58	2365.28	721.676	1256.89	641.312	422.99	459.917	892.104	1314.32	381.379	764.96	516.7	252.584	501.568	1333.43	721.581	1201.09	1238.73	427.644	241.386	1524.43	4425.1	185.305	1177.15	1511.96	807.931	1312.54	943.638	416.46	875.55	733.588	1115.17	3402.71	870.273	1387.56	480.66	1158.34	816.517
1110067D22Rik	3288.27	2155.53	1168.06	899.295	106.641	311.266	5007.29	568.833	2252.26	4711.27	6653.4	2158.22	9746.67	246.705	1289.01	1129.16	2.53288	0	1873.21	1679.96	247.46	61.3502	16.8323	37.7514	209.727	4841.97	492.7	1747.04	10664.5	0	1475.79	1537.07	542.31	50.5376	963.69	966.55	171.379	1852.7	372.011	289.33	0	268.698	368.532	2803.34	626.221	5.33676	575.736	2973.71	1348.11
1190002F15Rik	187.329	28.6292	161.998	133.194	0.730414	1195.26	5.92201	23.5227	21.4201	1854.69	39.1655	0	46.6394	309.005	182.158	28.4185	1621.04	83.6213	223.439	127.715	311.508	348.192	198.672	364.281	119.805	435.268	206.064	23.1615	281.919	0	0	0	0	0	856.292	128.173	526.38	56.4091	27.2203	267.725	0	213.252	918.937	2.09204	28.1598	0	105.64	165.791	0.439697
1190002H23Rik	1994.78	207523	7787.27	727.409	38.1104	208.548	41658.6	3246.26	92765.8	824.75	60430.3	8940.49	5189.34	4589.22	14211.2	336260	18766.1	31537.2	204960	3928.53	37165.6	10584.8	7540.86	56952	3674.93	2452.6	69.8764	17366.1	327.481	0	155710	10400.5	446.276	11505.7	16214.8	6194.92	661.035	709.654	7971.02	5616.89	1247.66	26895.4	3000.91	58.5772	26.8189	1259.47	554.608	11301.4	5823.35
1190002N15Rik	2263.38	4776.76	2951.94	541.688	1451.08	1736.86	1036.35	4961.7	364.982	1479.48	1489.64	1485.28	1312.56	4469.11	3362.73	6612.05	240.623	958.658	4606.31	1836.72	3604.18	692.255	509.814	3285.93	1405.63	3102.74	863.473	3657.86	885.624	0	1464.02	4029.76	0	6283.51	1376.92	748.026	2876.73	2350.47	6537.41	5953.82	7.95954	4648.9	1483.7	3927.81	4506.92	2737.76	433.122	15146.2	1539.16
1190003J15Rik	118.797	7.43355	196.886	37901.5	6.23001	0	289.267	7.10582	154.771	100.59	22.2838	0	1.90365	114.132	19.6539	5.68371	2.53288	5.97295	3.51059	10.2902	1.45565	15.6325	4.59062	6.61622	3.49993	2.45567	1.42605	193.564	5.69533	0	331.661	58.1459	977.288	0	3931.33	4764.01	2087.16	1630.09	3407.08	2.81815	13.9292	4.26505	478.613	81250.8	1896.1	4803.08	3517.8	7.45621	2.41833
1190005F20Rik	1870.53	2465.33	807.557	1203.67	4007.66	1441.16	1972.48	935.151	1014.3	2281.08	2461.35	1062.28	2212.99	804.908	863.332	971.914	2469.55	612.227	2141.88	1233.16	243.093	1183.06	1148.93	1776.65	2457.49	1566.1	1756.89	2557.69	1583.3	5293.29	2631.7	30.337	4170.89	1701.43	1621.1	1681.56	654.914	2086.59	4055.83	1285.39	1938.15	1612.19	3546.52	2893.3	3026.51	3319.46	1352.19	2188.18	2442.52
1190005I06Rik	40.2779	4.11859	10.8179	56.7482	14.6513	3.11266	6123.36	5844.66	34.8602	236.342	127.625	2201.48	593.938	0	11.5047	2.84185	0	0	113.372	36.0987	0	10.0284	0.510069	72.3892	26.6533	62.0057	55.6159	86.0283	37.0196	0	1.96249	907.581	5.64906	0	167.051	85.8488	0	43.2011	4.53672	0.313128	0	251.638	0	2024.05	1.34094	16.0103	0	193.423	53.4232
1190007F08Rik	1985.45	139.128	1278.68	1086.42	1289.53	96.4925	1484.6	6459.81	23.1001	90.7981	808.294	576.806	2145.41	265.644	1689.75	51.1534	2.53288	137.378	323.388	3915.75	0	114.884	3.31545	3.11351	398.993	2148.71	2170.45	1854.57	2386.34	0	19.6249	505.616	10656	33.6917	136.557	169.596	189.741	44.0266	27.2203	95.8172	11.9393	4.26505	0	1679.91	1700.32	795.177	126.767	2797.83	24.623
1190007I07Rik	540.105	460.78	527.914	786.033	773.165	245.9	886.024	541.023	411.812	1205.3	1273.55	1533.34	547.299	862.223	384.449	413.016	1886.99	209.053	643.471	675.336	1353.75	465.583	898.742	1285.1	919.406	362.825	904.115	1993.54	281.919	399.135	339.511	2090.72	1988.47	640.143	2658.58	1928.3	1120.09	558.588	1669.51	238.917	682.531	302.818	2541.44	2691.42	443.853	1979.94	1579.31	1281.59	1620.94
1200009I06Rik	1555.86	835.873	1182.94	204.012	80.1737	3.11266	1207.63	4.41051	2.31001	0	0	14.4201	367.404	219.294	1627.44	2105.81	25.3288	1110.97	788.851	1300.3	0	164.289	2.29531	14.7892	22.0765	406.413	2193.98	1450.9	0	19.0064	6970.76	0	305.049	0	827.912	36.3207	110.172	2038.98	462.745	512.278	0	0	832.787	106.694	5703.04	416.267	0	7882.97	713.189
1200011I18Rik	2429.36	1905	2233.63	2012.45	1610.86	1646.6	2289.54	1781.11	3518.99	2815.19	1297.19	1740.03	1159.32	1684.08	2146.11	3462.32	1615.97	1660.48	3458.55	2314.63	1467.29	2956.9	2403.19	1497.99	2639.76	1755.8	2793.63	1548.51	0	1444.49	2150.89	3175.27	864.306	1347.67	2076.4	1708.87	1854.57	1694.75	2331.87	692.639	2079.43	1151.56	2201.62	2262.55	2496.84	426.941	1579.31	1646.95	1445.06
1200011M11Rik	1290.87	1358.83	609.319	1281.53	2000.39	1506.53	545.736	934.783	667.173	1204.41	1050.72	24.0336	1971.23	1533.56	946.741	1581.02	1512.13	1552.97	1149	1062.13	1481.85	652.731	781.936	1202.6	1893.73	2774.91	1293.43	1421.12	1774.1	0	655.472	3501.39	2169.24	791.756	833.699	1032.59	477.414	911.626	140.638	1374.95	1046.68	1143.03	2804.67	1374.47	418.375	277.511	63.3837	2271.07	968.652
1200014J11Rik	2057.2	2961.17	1718.42	958.154	5142.38	4202.09	2084.55	1681.87	2014.33	1761.22	1310.02	350.89	2117.81	1097.96	1210.39	2532.09	2626.59	1759.03	1709.45	1806.26	697.254	1655.87	1426.41	3470.01	1676.2	2145.03	2024.99	1525.35	2605.61	418.141	2547.31	975.839	472.638	33.6917	2436.88	1717.58	1291.47	2296.54	1397.31	623.125	2481.39	2042.96	2354.78	2538.7	754.952	53.3676	2883.96	1402.21	1563.56
1200016B10Rik	1422.74	2668.85	1423.37	1504.06	1690.65	781.278	1419.46	1284.32	1857.46	1837.77	1147.95	1062.28	1752.31	2376.35	2120.7	4395.4	4708.62	1875.51	2063.2	1488.92	1537.16	1899.94	2016.56	2286.49	1641.74	1066.99	2275.26	1179.58	239.204	2071.7	3581.54	3096.9	2116.51	8271.32	2089.42	1989.23	1450.6	2802.29	802.999	4532.53	3283.31	3386.45	3345.51	2955.01	3035.9	160.103	2112.79	1135.1	1864.32
1300001I01Rik	1180.22	944.563	1037.44	4219.54	896.476	5244.83	4884.29	1169.89	825.934	2332.27	1741.51	3129.17	3330.43	1420.92	1077.61	1877.52	2.53288	1102.01	955.707	1273.41	607.004	1879.29	678.137	1532.24	1056.44	2304.03	437.797	11407	3721.9	1587.04	1332.53	13917.1	14230	3605.02	10565.1	2337.13	4780.26	2737.36	1755.71	2516.3	2849.52	1172.89	4101.72	18817.9	792.498	10518.7	2836.42	646.936	739.131
1300002E11Rik	1745.29	1917.05	1484.76	1918.42	1083.25	653.659	1859.97	1259.69	2163.85	1734.96	1654.4	552.772	1250.7	1398	2195.48	2667.55	5861.07	1800.84	3019.32	2066.34	2202.39	540.059	2204.77	877.622	917.252	2418.22	1653.5	1328.48	760.326	1501.51	2307.89	2191.85	1235.26	0	1879.08	3403.34	636.552	3636.6	1810.15	2024.06	2119.23	1484.24	1976.67	3606.68	2128.08	1110.05	1146.19	1985.55	3846.91
1300002K09Rik	6.24209	4.41995	0	105.055	0.687449	1839.58	0	0.367543	0.630003	0	0.675267	0	0	0	0	0	0	0	19.4115	12.6138	0	133.024	0	0.778379	41.4608	0	0	0	0	0	0	0	2033.66	0	3287.72	1639.83	33694.4	380.83	5856.9	0	0	0	421.18	18986.4	52.2969	10.6735	0	0	0
1300010F03Rik	765.478	1009.05	1234.05	2132.98	931.064	1413.15	4895.22	2033	2291.74	1287.2	2205.42	4258.75	2717.46	758.557	1297.63	536.163	326.741	176.202	2377.7	1227.02	3717.72	574.273	382.552	1104.52	550.836	1760.1	737.98	15865.6	6068.37	1434.98	1670.08	5223.01	24778.7	0	4163.49	3228.94	2919.57	12718.5	3434.3	1560.63	829.782	0	1143.89	15543.9	1972.53	186.786	417.276	1722.38	901.379
1300014I06Rik	6552.95	12248.9	4767.72	1550.26	4216.12	7993.31	841.381	366.562	8574.13	395.684	32825.4	0	11435.2	35420.9	15168	50677.8	3325.67	9604.5	17694.2	6498.01	275.117	1658.37	12629.8	6270.62	9191.37	3634.39	18309.8	4756.37	945.425	3639.73	7337.75	27.8089	16.9472	5811.83	79.2409	59.734	2166.73	1472.42	376.548	75117.2	8516.71	15904.4	14.3584	12111.9	3157.93	4466.87	23811.2	6358.39	20303.4
1300017J02Rik	17.1493	3.21451	13.5224	265.216	0.77338	0	958.454	15.1918	0.840004	42.7285	0.675267	0	0	49.3411	0.479362	0.947284	0	1075.13	0	31.2025	0	21.8265	0	47.0919	0.269226	0	0	18.1983	0	0	0	40.4493	13.1811	0	10.9068	0.600342	0	6.32883	0	0	0	0	1215.68	73266.5	392.897	9029.79	195.433	0	0
1300018I17Rik	850.239	1054.26	911.409	579.207	2980.22	1917.4	1378.92	2251.93	1228.72	1808.4	2991.43	9.61343	1732.32	1415.44	605.435	902.762	35.4603	818.294	2057.83	1482.62	200.879	2682.6	410.096	506.335	2092.69	907.37	1060.98	2400.52	0	836.283	23.5499	831.738	1242.79	0	1588.71	1006.47	2668.62	1870.31	875.587	539.833	117.403	4.26505	1766.08	1372.38	1135.78	3175.37	876.808	979.834	1386.58
1300018J18Rik	3495.64	2564.27	1688.68	2967.32	4070.13	2041.91	4184.13	8615.44	3254.6	2344.73	3433.06	4705.78	3310.44	2372.86	2664.3	17.0511	934.631	471.863	2398.97	2983.91	4176.25	1619.44	2832.16	3025.95	3136.48	5616.73	2762.26	1490.61	2904.62	1682.07	2264.71	9475.25	4918.45	320.072	5124.84	4798.83	2338.1	4816.24	1860.05	1130.39	2767.93	136.482	1273.11	10565.9	3334.93	330.879	5884.12	5589.96	2068.77
1500001M20Rik	1822.82	1540.45	1720.59	1485.3	1448.45	1282.42	1879.1	1723.28	1826.59	1661.07	1438.32	788.301	2887.83	970.375	1573.75	1373.56	2588.6	1406.63	1632.63	2145.26	623.017	1470.49	629.425	1920.65	1541.59	902.459	1432.47	3388.19	942.577	2888.98	777.146	879.772	6227.15	0	3485.93	1912.99	654.914	852.19	730.412	950.657	0	371.059	3192.35	988.491	1495.15	3943.86	2044.13	1714.93	1847.83
1500002O10Rik	0	0	112.236	0	0	0	87.4635	0	0	27.1504	24.9849	0	0	0	0	0	0	0	0	0	0	0	0	0	0	0	0	0	0	0	0	0	0	0	7.34537	79.8454	0	5.22816	0	0	0	0	0	0	0	0	0	0	0
1500002O20Rik	1046.96	689.512	693.428	1542.99	2589.75	2742.25	1823.52	2682.82	1062.39	1454.11	2279.03	951.73	593.938	570.164	1024.4	502.061	202.63	2054.69	826.848	803.05	1311.54	1529.48	922.205	1566.1	1646.05	1711.6	1042.44	228.306	973.901	1663.06	2319.66	2712.63	832.295	0	2373.11	1608.62	3029.74	1803.99	2322.8	1290.71	1317.3	4311.96	885.435	1224.89	443.853	261.501	95.0756	1683.79	1458.26
1500003O03Rik	14203.4	9120.37	13158.1	26497.9	4406.29	6832.29	8193.33	10056.3	10708.4	7521.56	7253.72	10661.3	17579.2	17878.9	16683.2	9180.13	2467.02	10458.6	8653.2	15650.1	9822.7	16330.7	10023.4	7818.81	8681.45	8868.65	14815.2	13903.5	11752.3	4941.67	7881.36	34012.8	15032.2	1549.82	11769.7	8038.57	6555.26	81411.6	10906.3	35665	9334.55	3420.57	3355.08	34846.1	8226.7	20269	12523.6	11725.1	5146.43
1500004A13Rik	429.587	59.6693	57.0645	11.2558	234.205	0	1175.29	5857.4	99.5405	3415.17	2605.18	432.604	387.392	0	36.4315	0	0	47.7836	40.4751	81.8237	0	57.2209	68.8593	130.378	243.649	429.128	72.7285	152.204	760.326	389.632	49.0622	0	0	336.917	93.7091	43.5248	201.983	124.375	231.373	1.25251	340.27	85.301	0	51.2551	154.209	0	0	174.124	118.498
1500009L16Rik	3541.37	30.0356	1039.33	48.5408	0.859311	3.11266	31.8877	57.5817	21.4201	1498.17	1103.39	1999.59	9313.59	130.081	1845.07	51.1534	311.544	2.98647	155.499	938.648	0	12.0931	2.80538	541.752	240.419	735.473	9.98234	454.957	2041.78	0	0	0	0	0	555.354	1946.61	7301.99	2095.12	14658.1	19.7271	0	921.25	0	0	0	0	0	1641.24	108.165
1500010J02Rik	1090.72	1626.54	950.624	845.361	48264.6	17334.4	1784.35	1490.02	978.395	2991	2110.88	2682.15	1390.61	206.335	646.181	2353.05	2.53288	1409.62	773.363	1019.31	42.2137	2587.03	893.386	698.984	4257.8	2187.39	1386.83	2569.27	566.685	1549.02	2307.89	725.559	1899.97	2493.19	1525.61	533.403	403.966	1095.44	1188.62	1317.02	1267.56	1032.14	9.57227	816.943	819.317	2764.44	2096.95	1553.96	321.858
1500011B03Rik	849.582	864.703	447.05	1909.04	1374.04	361.069	3370.99	9470.47	1433.47	13411.4	5269.11	7681.13	423.562	62.7978	234.888	443.329	1322.16	328.512	1097.37	1082.21	695.799	997.236	1711.03	2107.85	1092.52	567.874	516.23	322.606	777.412	883.799	151.112	508.144	1278.57	2543.73	1118.72	1047.6	1248.62	527.769	3887.97	224.2	2318.22	784.769	2799.89	202.928	457.262	250.828	3163.9	1111.41	1833.32
1500011H22Rik	5378.85	3254.29	3197.5	791.192	1680.04	3837.91	7577.89	4800.6	4278.98	15615.5	7524.5	14040.4	4862.87	3438.92	4312.34	1207.79	757.33	809.334	3425.51	3986.46	183.411	1015.67	1482.52	1691.42	1503.89	6023.76	3524.48	2443.53	6911.28	1064.36	2494.32	3417.96	14585.9	1869.89	1078.88	590.436	214.224	225.636	6192.62	3170.11	4765.78	1927.8	646.128	1542.88	1468.33	0	6016.17	2635.99	3802.94
1500011K16Rik	1551.13	1383.34	1373.06	1301.69	1426.33	610.082	3673.92	2140.81	1842.13	2862.37	2397.87	3244.53	1927.44	986.822	1185.94	521.954	344.471	1042.28	1600.21	1300.38	525.488	1162.7	243.813	466.249	1654.93	1807.99	3433.93	4456.93	1346.95	1187.9	1118.62	3539.31	3624.81	1516.13	1908.46	1499.95	2858.36	1934.97	2386.31	449.026	397.977	1079.06	923.724	3762.54	634.267	923.259	448.968	1393.43	2544.31
1500012F01Rik	1527.14	1028.04	3973.96	1649.22	1048.45	2941.46	1200.35	1854.25	2102.74	2087.02	847.46	990.184	1248.79	8554.95	2376.2	3155.4	9277.92	3207.47	3617.77	4231.59	2595.42	3894.12	4715.59	5623.79	1464.59	1034.45	1760.46	1321.86	646.42	4732.6	4072.17	462.639	137.46	4262.01	9260.95	3962.55	6720.52	2766.25	7050.06	6250.66	6908.88	5399.55	2091.54	1339.95	1465.65	1131.39	2783.6	1169.31	1509.92
1500015A07Rik	336.613	452.442	152.262	1011.85	976.435	759.489	452.35	508.556	496.442	1025.04	422.042	0	203.69	478.957	42.6633	341.97	529.371	468.876	1263.81	105.806	192.145	472.072	1797.74	859.719	411.108	221.624	511.952	198.527	0	0	0	0	0	0	2971.53	1546.48	1028.28	1378.86	1465.36	712.367	988.973	1390.41	124.439	21.9665	1428.11	0	0	351.319	658.007
1500015O10Rik	1631.88	5.92675	246.919	7.03491	3.9958	3.11266	3595.57	99.4815	3.15001	22.2544	21.6085	13300.2	4.75912	9349.89	3127.36	143.987	7.59863	8.95942	309.552	1767.76	4.36694	12.8305	15.8121	68.1081	10.769	1.22784	164.709	0	0	142.548	45.1373	17.6966	1.88302	0	2.00328	3.60205	0	18.9865	0	1648.93	0	0	0	0	0	0	0	625.006	89.4783
1500017E21Rik	8.47611	5.12312	17.0382	0.468994	0	0	317.055	0.980114	0.420002	22.6995	0	0	527.31	0	0	0	0	0	0	10.4562	0	2.80205	0	0	27.1918	0	0	2397.21	0	0	0	0	0	0	42.1802	0	0	1.92616	22.6836	0	0	0	0	5120.28	155.55	0	0	0	0
1500031L02Rik	2467.8	1117.24	1578.33	735.382	533.246	136.957	4781.34	1654.68	1743.01	8175.39	2636.24	4042.45	2762.19	98.6822	715.209	161.038	0	316.566	1328.86	1946.84	583.714	1014.2	526.646	1346.21	712.91	1206.35	1649.23	2474.97	2964.42	1396.97	31.3998	2389.04	2112.75	0	2538.71	2889.14	3390.86	3156.16	1465.36	407.38	382.058	157.807	1220.46	2969.66	323.168	496.318	190.151	1375.01	1379.55
1500032L24Rik	11290.8	9773.31	15278.7	8621.98	4958.35	10156.6	15429.6	17306.2	12755.7	11986.2	8726.47	23726	10491	11622.6	9426.66	8780.38	10427.8	18017.4	10766.4	10370.6	7537.34	17012.6	6451.35	6617.78	9241.17	7912.17	11423.4	32551.8	8964.45	6927.84	9969.45	16882.5	18594.8	7311.11	14504.3	22217.1	40769.9	44629.5	7880.28	9390.09	4331.98	4422.85	7399.36	18082.6	9704.42	14852.2	5535.51	9375.09	13559.4
1520402A15Rik	239.302	250.129	223.119	438.275	89.8839	0	2515.94	1316.42	2530.72	907.091	1034.51	197.075	1673.31	175.435	26.8443	945.39	215.294	0	1234.28	196.344	0	24.4811	70.6446	164.238	127.613	2720.27	0	522.787	367.349	0	0	1676.12	0	0	374.614	233.533	348.88	30.2683	2472.51	207.604	0	0	0	44.979	49.615	0	0	774.569	218.749
1600002D24Rik	0	30.2365	1.35224	58.8587	0	0	0	0	0	0	0	0	0	0	0	0	0	0	131.131	0.165971	0	62.53	0	0	118.19	0	0	1.65439	0	0	0	0	0	0	94.7107	42.3241	42.8449	55.5836	18.1469	0	0	0	0	0	0	0	0	0	0
1600002H07Rik	1682.74	572.886	447.591	707.712	1066.45	3806.78	802.204	796.465	1162.99	1184.83	578.704	394.151	731.952	131.078	605.435	453.749	405.26	2.98647	1013.12	1377.56	5.82258	489.474	389.183	85.6217	1129.4	693.113	1942.28	726.277	817.28	1026.35	1970.34	874.716	5.64906	0	1225.67	586.234	0	142.261	36.2938	585.55	0	25.5903	23.9307	13465.4	628.903	16.0103	3089.96	1853.09	971.73
1600002K03Rik	1404.6	746.369	1482.86	1409.33	1448.71	1428.71	363.52	443.746	482.162	567.933	432.171	62.4873	377.874	361.835	1591	147.776	2755.77	2657.96	499.33	1640.62	260.561	2136.49	1115.78	1532.63	2066.58	779.061	763.649	1083.63	478.408	4219.43	594.634	2.52808	564.906	539.068	2577.44	3149.09	7748.8	1486.17	1370.09	955.667	1273.53	2597.41	2842.96	971.755	592.698	763.156	475.378	1669.31	1375.15
1600010M07Rik	0.591356	0	61.1212	11.7248	1528.71	2496.35	0	0	0	0	0	0	0	0.498395	13.4221	0	0	2407.1	8.87974	11.286	0	5516.8	2.80538	0	2447.8	0	0	0	0	2632.39	0	0	9.4151	0	2.55975	3.60205	0	18.4361	0	46.343	0	0	0	0	1.34094	3858.48	306.355	1.7544	0.659545
1600012F09Rik	2968.81	3272.07	2338.29	2015.5	4459.31	2250.45	4808.22	3886.03	4251.89	3093.81	5872.8	7210.07	2259.63	2861.28	3372.31	1202.1	314.077	830.24	2681.27	2668.65	20.379	561.295	1918.37	632.822	1740.54	2996.53	3664.95	9496.2	5538.71	3668.24	1269.73	3377.52	3656.83	4160.93	2487.19	2918.86	924.225	1811.15	1270.28	2508.16	1303.37	4785.38	775.353	4701.87	4005.4	2657.7	2783.6	3215.82	3107.56
1600012H06Rik	4800.89	6251.11	2113.01	4744.11	8576.14	7143.56	4620.53	4234.7	3262.58	1724.72	4516.86	2432.2	1946.48	2678.87	2850.77	1783.74	1312.03	3742.05	2974.3	4062.64	2203.85	3104.08	4593.17	2953.56	5836.01	6419.12	4010.76	2383.98	3867.13	978.831	4813.99	6889.02	2061.91	0	3244.43	6787.46	4566.04	6782.85	5897.74	3964.2	5328.91	2448.14	1536.35	3209.2	3499.87	2001.28	190.151	5430.75	4981.77
1600014C10Rik	2037.03	3284.02	982.807	5803.8	6549.11	7977.75	1158.44	1635.56	2006.77	643.599	1728.68	1999.59	3792.07	596.08	1319.21	1660.59	1557.72	1720.21	3595.26	1995.55	1864.68	5405.9	2382.53	6504.52	4563.38	2454.44	2331.59	5380.08	3354.55	6091.56	4142.82	624.436	3154.06	1516.13	924.069	633.06	128.535	610.869	408.305	625.63	865.6	2768.02	6915.96	19384.9	3526.69	3805.11	2625.14	1864.05	567.209
1600016N20Rik	0	0	0	241.532	0	0	0	0	0	0	0	0	0	0	0	0	0	0	0	0.91284	0	16.9598	5.61076	3.11351	0	0	0	0	0	0	0	0	0	0	270.777	334.39	0	379.179	303.96	0	0	0	196.231	194.56	0	0	0	0	0
1600020E01Rik	588.465	898.053	924.931	786.502	635.804	118.281	535.258	1389.56	904.474	871.484	1087.85	562.386	1058.43	1205.62	917.5	748.355	197.564	379.282	799.589	606.79	375.557	719.39	1074.97	1308.45	773.485	729.334	474.874	817.269	1529.2	807.773	902.745	467.695	252.325	2408.96	631.368	682.889	4186.55	1281.73	1243.06	1583.18	1227.76	2631.53	813.643	1813.8	505.536	805.85	633.837	1120.62	991.077
1600021P15Rik	432.019	239.28	363.752	1716.05	57.6168	0	496.993	229.469	84.2104	664.518	4423.67	4.80672	898.522	2.49197	332.678	341.022	0	0	625.505	286.798	0	18.1396	0.765104	0	88.8445	467.191	214.62	443.377	1580.45	9.50321	1.96249	1013.76	1493.24	0	429.147	273.456	416.207	587.48	122.491	225.452	3.97977	0	0	1415.27	8488.18	0	1383.88	580.707	167.964
1600027N09Rik	899.584	926.783	792.953	1213.76	1737.18	504.251	1569.79	1130.07	1247.2	1053.53	2798.98	4114.55	1029.87	789.457	493.264	333.444	1909.79	1069.16	1069.7	917.819	1260.59	927.922	2201.71	2851.2	1163.59	611.462	937.627	860.283	1201.71	826.779	810.508	444.942	96.034	0	1891.54	2053.77	4847.59	2678.47	993.542	1178.93	1164.08	5536.03	1000.3	809.621	834.068	42.6941	3750.2	948.693	1706.68
1600029D21Rik	274.849	33.2501	60.8507	90565.7	96.8873	3.11266	295.645	104.505	78.7504	77.8906	83.7331	24.0336	39.0248	388.748	119.841	51.1534	86.1178	1735.14	19.8245	24.9786	2.91129	530.178	11.9866	13.6216	169.343	3.68351	53.4768	33.0878	2.84766	0	141.299	31163.6	32.0113	16.8459	1021.56	68020.5	967.07	418.253	15919.3	388.592	1181.99	0	296.74	985.353	634.267	0	0	35.9653	26.162
1600029O15Rik	39.6866	0.502267	15.1451	4.68994	0	0	0	8.20845	43.2602	232.336	7.42794	0	3.80729	0	200.373	802.35	0	0	99.7422	352.107	0	72.7059	0	0	0	0.613918	0	0	0	0	0	0	0	0	12.5762	87.3497	36.7242	6.60399	0	4.38379	0	8.5301	0	0	0	0	0	0	0
1700001C19Rik	0.788475	144.653	0	11.9593	687.062	0	0	0	553.773	0	0.675267	0	0	0	0	0	0	0	36.1385	34.356	0	43.653	0	0	1.88458	0	34.2252	0	0	0	0	0	0	0	88.367	37.2212	434.569	53.9326	9.07344	0	0	0	0	3975.93	274.894	0	839.835	3.5088	108.825
1700001D01Rik	113.212	178.506	246.919	1060.63	7.30414	124.506	99.3075	37.6119	147.421	117.503	188.399	0	39.9766	20.4342	296.725	1225.79	195.031	0	459.681	131.117	50.9476	52.7966	10.4564	1.16757	0.269226	204.435	310.879	0	8.54299	0	0	0	0	0	186.305	149.785	128.535	116.12	4.53672	90.494	0	0	0	5.23011	1736.52	0	0	336.407	219.189
1700001G11Rik	48.097	23.3052	43.5421	9.61437	58.8628	99.6052	30.5211	109.65	0	80.5611	37.1397	0	0	0	0	0	0	0	1.03253	39.999	0	35.2469	4.08055	1.55676	46.3068	48.4995	1.42605	28.1246	0	0	0	0	0	0	23.4829	9.90564	0	3.85233	0	0	0	0	0	0	0	0	0	55.2637	23.0841
1700001G17Rik	229.249	0	50.3033	52.2928	157.426	0	96.1188	37.2443	26.8801	202.961	708.355	0	0	0	0	0	0	0	106.35	186.8	69.871	25.6609	102.014	82.5081	38.7685	6.75309	0	1.65439	0	0	0	0	0	0	223.7	135.077	42.8449	88.0533	612.457	0	0	0	0	0	0	0	0	570.619	71.2309
1700001K19Rik	70.24	148.571	286.134	67.0661	77.1661	0	122.084	97.6438	61.9503	218.094	58.7482	307.63	47.5912	91.7047	312.065	180.931	0	29.8647	477.647	263.396	0	308.078	74.2151	0	130.574	95.1572	318.722	0	754.631	0	0	0	0	0	102.167	99.9569	336.638	109.241	970.858	329.724	69.646	0	0	6.27613	331.213	0	301.073	187.721	165.766
1700001K23Rik	65.772	11.753	45.1648	0	53.7929	429.547	31.8877	21.44	17.6401	0	0	0	0	0	0	0	0	0	0	68.297	0	57.2209	0	65.773	6.46142	0	0	0	0	0	0	0	0	0	22.5926	0.900512	0	5.50333	22.6836	0	0	0	0	0	325.85	0	0	0	67.7133
1700001L05Rik	179.969	52.2358	691.535	2066.39	187.802	526.04	0.455539	12.4964	33.1802	111.717	0	0	635.818	0.498395	140.933	7.57828	2.53288	164.256	154.466	86.2219	0	276.076	16.0672	5.83784	169.074	327.218	9.26932	0	0	0	0	0	903.85	0	1399.85	466.465	844.656	556.662	2050.6	292.462	43.7775	0	4.78613	854.6	2.68189	1088.7	0	422.811	266.456
1700001L19Rik	39.6866	5.42448	33.5355	12.4283	0	0	945.244	49.1282	74.3403	398.355	49.2945	302.823	419.754	0	0	392.176	0	0	14.0424	34.6879	0	28.463	0.510069	0	0	0	0	0	0	0	0	0	0	0	77.0151	62.7357	0	68.2413	0	174.099	0	0	0	0	0	0	0	22.8072	0.439697
1700001O22Rik	122.739	211.153	67.3415	106.696	0	0	216.837	189.774	103.11	250.14	826.527	0	355.982	0	0	0	0	0	13.8359	91.6989	0	1.32729	1.27517	111.308	1.34613	0	0	3.30878	0	0	0	0	0	0	649.731	362.606	0	260.032	4.53672	0	0	0	0	0	0	0	0	0	60.4583
1700001P01Rik	29.305	47.8158	215.006	356.435	16.2839	0	165.816	325.275	43.2602	12.0174	2.70107	0	69.4831	174.937	289.056	188.51	45.5918	331.499	727.519	1018.48	256.194	189.36	106.859	608.303	0	0	0	11.5807	0	0	0	0	0	0	441.946	368.009	0	214.355	95.2711	689.821	15.9191	0	0	0	0	0	0	84.2113	332.851
1700003E16Rik	267.424	0	80.5934	103.648	11.6866	0	696.064	75.5913	0.840004	1037.95	57.3977	692.167	248.426	0	135.66	0	0	0	0.413011	208.21	0	7.66878	0	0	0	85.3345	0	289.518	0	0	0	0	0	0	267.104	134.176	18.3621	120.798	331.181	30.3734	0	0	4.78613	131.799	0	0	0	184.651	0
1700003F12Rik	5.78215	5.8263	9.19522	4.92443	113.085	140.07	146.684	10.2912	0	0.445089	0	317.243	0	156.496	93.955	0	0	0	15.9009	47.4677	0	7.81625	0	0	26.3841	33.1516	0	8.27195	39.8673	0	0	0	0	0	7.34537	4.20239	165.259	1.10067	0	4.69692	0	0	0	0	0	384.246	0	0	0
1700003G13Rik	0	0	0	92.8608	0	0	0	0	0	0	0	0	0	0	0	0	0	0	0	0	0	0	0	0	0	0	0	0	0	0	0	0	0	0	7.01149	29.4167	0	3.302	0	0	0	0	0	0	0	0	0	0	0
1700003G18Rik	0	0	2.43403	10.5524	8.59311	0	0	0.612571	0	28.4857	0	153.815	1.90365	0	0	0	0	0	11.5643	2.32359	2.91129	1.03234	0	0	0	0	0	0	0	0	0	0	0	0	13.0213	25.5145	0	10.4563	0	0	0	0	0	0	0	0	0	0	0
1700003M02Rik	0	0	12.4406	4.45544	0	0	1121.99	0	7.35003	133.527	0	0	0	0	0	0	0	0	0	0.414927	0	0	1.27517	0	0	0	0	0	0	0	0	0	0	0	106.842	96.9552	42.8449	17.0603	149.712	0	0	0	0	0	0	0	0	0	0
1700003M07Rik	19.3176	0.200907	854.885	1.17248	0	0	7172.01	60.1545	0.210001	176.255	929.842	72.1007	2.85547	0	0	0	0	0	0	14.2735	0	21.2366	0	0	0	0	0	18.1983	0	0	0	0	0	0	1.6694	0	0	2.75166	18.1469	0	0	0	0	0	0	0	0	0	0
1700007J10Rik	1.24842	7.3331	47.0579	35.409	21.6546	0	0	7.10582	26.6701	66.3182	0	0	1.90365	0	9.58725	39.7859	0	0	5.78215	19.9165	0	5.30915	0.510069	0.778379	0.269226	0.613918	0	0	0	0	0	0	0	0	8.79218	3.60205	0	9.08049	0	85.484	0	0	0	0	0	0	0	367.547	0.439697
1700007K13Rik	8.54181	0	14.0633	253.491	0	0	2788.81	48.1481	0.840004	34.7169	21.6085	975.763	105.652	0	0	0	0	0	0	5.726	0	20.6467	0	0	0.269226	36.8351	0	0	0	0	0	0	0	0	7.90183	183.404	0	1.37583	1011.69	0	0	0	0	46.025	0	0	0	0	0
1700007L15Rik	88.3749	233.052	53.2782	523.162	387.163	473.124	184.038	285.948	102.69	203.406	55.3719	0	14.2774	0	63.7552	0	0	283.715	145.999	47.1357	1845.76	165.911	571.022	245.968	138.92	278.719	101.249	866.901	0	28.5096	565.197	176.966	499	0	645.391	407.932	18.3621	408.347	0	272.421	0	0	76.5781	1235.35	1.34094	0	1405.01	0.438601	289.101
1700008J07Rik	434.384	376.298	582.815	665.033	938.282	501.138	1163.9	674.073	630.423	579.951	645.555	682.554	684.361	1030.18	468.816	442.382	759.863	2657.96	758.082	449.034	839.908	380.932	659.009	418.768	646.68	707.847	949.749	545.949	142.383	1178.4	2382.46	389.324	634.578	84.2294	1059.85	714.707	5894.23	605.916	1097.89	619.367	1327.25	362.529	19.1445	397.488	131.413	2118.69	581.018	732.463	465.419
1700008O03Rik	2.89108	0	76.8072	118.655	47.9496	0	167.638	128.885	2.10001	693.448	127.625	0	5.71094	0	0	0	0	0	10.9448	46.7208	0	39.5237	63.2486	0	10.2306	0	0	71.1388	0	0	0	0	0	0	161.264	63.336	55.0862	34.9461	258.593	0	0	0	0	37.6568	0	0	0	19.737	0
1700008P20Rik	0	0	0	106.696	37.0793	0	0	0	0	0	0	0	0	0	0	0	0	0	0	0	0	0	0	0	0	0	0	0	0	0	0	0	0	0	2.11458	0	12.2414	38.2481	0	0	0	0	0	0	0	0	0	0	0
1700009P17Rik	109.532	8.33763	140.903	1252.92	374.316	329.942	1705.99	197.248	0.210001	35.6071	45.2429	0	143.725	453.041	146.685	60.6262	0	173.215	10.7383	158.004	8.73388	393.467	0	0.778379	203.804	31.9237	212.481	311.025	1213.11	0	0	0	459.457	0	396.984	207.718	128.535	52.2816	1569.7	31.9391	0	0	38.2891	730.124	0	432.277	1389.16	275.003	9.01379
1700010I14Rik	3.61384	9.14126	20.8245	66.3626	331.823	0	230.503	128.762	27.5101	117.058	25.6601	0	15.2292	85.2255	86.7646	0	30.3945	0	11.9773	84.9771	835.541	281.238	205.813	499.719	29.8841	0	0.713024	0	0	0	0	0	0	0	489.802	396.526	48.9655	244.898	426.452	5.63631	13.9292	0	641.342	163.179	0	0	0	68.8603	0.659545
1700011A15Rik	0	0	0	39.3955	0	0	0	0	0	0	0	0	0	0	0	0	0	0	0	0	0	0	0	0	0	0	0	0	0	0	0	0	0	0	24.1507	105.66	0	10.7315	0	0	0	0	0	0	0	0	0	0	0
1700011E24Rik	0	0	88.166	4.45544	9.49539	0	23.688	16.0494	21.4201	11.5723	0	0	5.71094	0	31.1586	0	0	32.8512	196.18	220.16	0	177.414	30.0941	39.3081	0	0	0	0	0	1948.16	180.549	0	0	0	92.0397	99.6567	306.035	79.2479	90.7344	94.8778	0	85.301	0	0	0	0	0	0	43.9697
1700011H14Rik	0.197119	0.30136	15.1451	14.0698	3.22242	0	102.952	28.9134	10.08	525.205	96.5632	0	0	0	0	0	0	0	0	8.04959	0	15.1901	0.255035	0	0.538451	0	0	14.8895	2.84766	0	798.733	69127.8	23221.4	0	3725.44	177.101	1334.31	338.18	36.2938	0	0	0	0	0	0	0	0	98.6851	0.439697
1700011J10Rik	1148.28	225.417	862.999	509.327	738.965	301.928	1823.52	907.095	655.833	1799.49	700.252	1937.11	1201.2	1354.64	782.319	184.72	704.139	1137.85	513.992	988.191	352.266	613.06	598.566	473.254	812.792	692.499	824.969	1131.6	1275.75	0	270.824	831.738	419.914	1718.28	854.622	1107.63	2846.12	704.976	494.502	364.168	107.454	102.361	291.954	263.598	433.125	1270.15	322.201	491.233	919.626
1700012A16Rik	1.11701	0.30136	30.2901	184.784	186.857	236.562	0.455539	317.924	33.8102	263.938	39.1655	0	19.0365	0	104.98	69.1518	0	0	18.379	52.9447	0	191.424	292.27	3.5027	47.3837	125.239	0	0	148.079	0	0	0	0	0	251.968	44.1251	0	93.5566	49.9039	220.129	1255.62	0	0	0	0	0	0	20.1756	4.61682
1700012B15Rik	550.881	577.507	589.035	537.467	523.75	40.4646	608.145	980.481	396.902	1034.83	1063.55	600.84	571.094	391.24	390.68	912.235	1068.87	1433.51	640.58	475.009	333.343	1185.86	608.257	594.681	712.102	545.773	626.749	157.167	603.705	85.5289	584.822	950.558	434.978	84.2294	398.987	630.058	1719.91	965.559	925.491	422.41	776.055	686.673	579.122	390.166	197.119	90.7249	258.817	522.373	646.135
1700012D01Rik	91.2003	6.42902	280.184	70.1146	100.582	983.601	46.9205	4.65554	80.2204	105.486	6.75267	4.80672	275.077	63.7945	155.793	46.4169	0	0	100.155	69.2929	0	309.406	250.699	52.5406	67.0372	121.556	142.605	842.085	264.833	0	15.6999	1274.15	256.091	0	20.1441	33.6191	12.2414	9.35566	99.8078	2.50503	21.8887	0	0	1080.54	52.2969	891.238	174.305	124.563	86.1806
1700012D14Rik	86.1409	84.7827	47.3284	123.58	493.373	199.21	302.022	108.058	64.4703	266.163	253.9	692.167	226.534	79.2448	64.2346	0	70.9205	65.7024	92.721	126.719	58.2258	105.003	249.679	245.189	83.9984	271.352	181.108	97.609	0	522.677	351.286	0	50.8415	353.763	253.415	140.18	869.138	186.563	104.345	100.827	382.058	678.143	134.012	28.2426	26.8189	0	0	173.686	165.326
1700012L04Rik	0	0	0.540895	34.2365	0	0	0	0.367543	32.9702	0	0	0	4.75912	0	0	0	0	0	0	0	0	0	0	0	0	0	0	0	0	0	0	0	0	0	11.7971	27.0154	0	36.0468	0	0	0	0	0	0	0	0	0	0	0
1700013F07Rik	8.27899	1.00453	108.179	30.4846	0	0	417.729	3.06285	2.52001	186.047	0.675267	0	0	0	0	0	0	0	908.831	625.793	0	103.971	0	0	0	79.1954	0	0	5.69533	0	0	0	0	0	133.218	39.6225	0	39.8991	0	0	0	0	0	0	0	0	0	0	0
1700013G23Rik	29.5021	0	139.551	0	0	0	705.63	24.5028	21.2101	301.77	143.157	177.848	340.753	0	0	0	0	0	25.6067	54.9364	0	2.35962	0	0	0	14.1201	0	117.462	116.754	0	0	0	0	0	48.5239	17.7101	0	25.3153	0	0	0	0	0	0	0	0	0	66.6673	11.4321
1700013N18Rik	15.0467	10.4472	48.6806	80.4324	235.623	15.5633	149.872	1.96023	5.67003	32.0464	0	0	0	0	0	0	0	0	1.65204	9.7093	0	23.8912	0.510069	0	121.69	1066.37	0	1.65439	0	0	0	0	0	0	22.0361	26.1149	24.4828	33.5703	267.666	0	0	0	0	120.293	505.536	0	26.4099	92.9833	56.5011
1700015E13Rik	56.7045	23.0038	33.5355	16.4148	568.477	572.73	73.7973	35.6516	0	0.445089	0	0	0	0	0	0	0	0	2.06506	55.2683	0	16.9598	0	0	0.269226	0	0	1.65439	0	0	0	0	0	0	85.4734	95.7545	0	256.73	1202.23	0	0	0	0	0	0	0	0	48.6847	274.151
1700016C15Rik	0.0657063	30.136	2.97493	26.4981	0	0	17.766	4.90057	20.1601	0.445089	0	0	0	0	141.412	53.9952	0	0	21.8896	13.6926	0	37.0166	62.7385	0	0	0	0	1.65439	0	133.045	0	743.256	9650.48	0	63.1034	60.6345	12.2414	98.2344	18.1469	107.716	0	0	0	0	0	0	0	0	0
1700016G22Rik	0	0	40.2967	8.67638	0	0	0	0	0	0	0	0	0	0	0	0	0	0	187.507	201.572	0	102.939	0	38.9189	0	0	0	0	0	1691.57	274.749	0	0	0	56.4258	81.3463	355	37.973	117.955	0	0	0	0	0	0	0	0	0	0
1700016H13Rik	0	0	6.76119	55.8103	0	0	0	0	0	0	0	0	0	0	0	0	0	0	0	0	0	0	0	0	0	0	0	0	0	0	0	0	0	0	128.321	115.266	477.414	54.2078	440.062	0	0	0	0	0	0	0	0	0	0
1700016K19Rik	0	0	0.811343	113.027	0	0	1112.43	0	0	36.9424	2.0258	413.378	0	0	0	0	0	0	0	0.165971	0	0	36.4699	17.5135	0	0	0	0	0	0	0	0	0	0	186.973	71.4406	30.6035	526.118	149.712	0	0	0	0	0	0	0	0	0	0
1700016P04Rik	0	0	7.84298	0	0	0	0	0	0	0	0	0	0	0	0	0	0	0	0	0	0	0	0	0	0	0	0	0	0	0	0	0	0	0	0.33388	0	0	4.67783	0	0	0	0	0	0	0	0	0	0	0
1700017B05Rik	2314.63	1127.89	1698.14	2157.14	34262.5	8506.9	869.169	274.922	635.883	330.701	605.039	3787.69	2663.2	1001.28	2572.74	798.561	3199.02	5118.82	332.887	1771.49	114.996	3084.77	3724.27	689.254	6641.26	5888.7	929.071	2081.22	5342.22	11213.8	492.585	1274.15	1997.88	1246.59	1240.7	611.448	153.017	752.305	1755.71	2089.19	4743.89	916.985	1225.25	2251.04	1256.47	549.686	3269.54	3279.86	1903.45
1700018A04Rik	0	0	478.692	313.522	0	0	0	0	1000.86	0	0	0	1.90365	0	0	0	0	0	0	6.63884	0	0	0	0	0	0	0	0	0	0	0	0	0	0	30.2718	1.20068	18.3621	4.67783	0	0	0	0	0	0	0	0	0	782.025	0
1700018L02Rik	100.662	62.9843	144.69	116.076	85.3296	28.014	224.125	289.379	162.121	122.399	155.987	139.395	436.887	40.37	65.1933	33.155	15.1973	2.98647	103.046	111.283	24.746	21.3841	24.7384	8.17298	33.9224	48.4995	42.7815	95.9547	56.9533	47.5161	76.5371	93.539	242.91	522.222	173.618	141.08	526.38	196.744	22.6836	41.9592	0	0	9.57227	860.876	76.4339	0	36.9738	92.1061	70.3515
1700019B03Rik	0	0	14.0633	41.0369	0	0	0	0	0	0	0	0	0	0	0	0	0	0	0.619517	30.2897	0	141.872	0	0	0	0	0	0	0	0	0	0	0	0	10.3503	9.00512	0	1.651	0	0	0	0	0	0	0	0	0	0	0
1700019D03Rik	3906.83	45.9072	21.0949	649.791	78.7988	0	2398.41	1498.84	3.78002	772.674	3738.28	788.301	0	5.48234	4722.68	65.3626	0	0	3.51059	4886.93	18.9234	6.93139	57.6378	19.8487	89.6522	0	1.42605	330.878	213.575	0	0	0	0	0	808.547	3026.02	67.3276	278.744	217.763	10.9595	0	21.3252	0	0	0	0	0	1044.31	0.879394
1700019E19Rik	4290.16	2097.57	5424.1	2168.16	189.65	1117.45	4244.71	4987.8	1639.48	2042.07	2050.79	2321.64	14438.2	8614.26	4575.51	1459.77	20.263	866.077	1987.2	3919.15	1.45565	420.16	6.12083	71.2217	1101.67	14502.6	3346.94	5404.89	14859.1	0	4792.4	9250.25	3355.54	16.8459	3589.21	1352.57	2374.83	3127.82	1370.09	4597.66	1.98989	0	4.78613	483.262	4199.84	1040.67	0	5731.19	6007.58
1700019G17Rik	40.935	0.100453	97.3612	263.574	42.2351	0	12538.7	1139.01	1432.42	83.6767	212.034	7998.38	8.56641	0	0	0	0	0	4.33662	18.0908	27.6573	94.9749	309.102	514.508	33.384	294.68	0	59.5581	0	0	0	1276.68	1225.85	0	687.237	498.884	869.138	1636.14	1533.41	0	0	0	19.1445	583.68	123.367	0	0	4.38601	7.91455
1700019L03Rik	21.4859	6.42902	99.5248	97.5507	54.1366	0	308.856	367.665	3.78002	146.879	30.387	0	41.8802	165.467	137.577	9.47284	0	0	127.001	135.93	0	15.485	0.255035	0	55.4605	0	203.212	24.8159	0	0	0	0	0	0	167.274	319.682	0	1153.5	8288.59	714.558	0	0	0	37.6568	0	160.103	0	257.459	0.439697
1700019N12Rik	7.3591	0.200907	49.4919	326.185	0	0	342.11	68.853	0	277.735	0	0	80.905	0	0	0	0	0	191.018	63.4839	0	22.4164	69.1144	0	93.9598	501.571	0	899.988	0	0	0	0	0	0	182.41	108.362	0	103.187	0	0	0	0	0	0	0	0	0	0	0
1700019N19Rik	0	0	21.6358	257.009	0	0	0	0	0	0	0	0	0	0	0	0	0	0	0	0	0	0	0	0	0	0	0	0	0	0	0	0	0	0	0	0	0	0	0	0	0	0	0	0	0	0	0	0	0
1700020I14Rik	4581.17	11458.9	3311.9	4065.71	4161.82	4158.52	5170.82	5286.12	9297.16	9037.08	2888.79	9512.49	8838.63	5284.48	4374.66	8388.2	13008.8	4554.37	8572.66	3500.49	7589.74	3690.6	6604.89	3763.85	4574.14	3030.3	6986.21	15033.4	9374.51	1368.46	7743.98	7308.68	2331.18	15969.9	3180.43	3484.08	14273.5	5064.71	3674.74	3883.73	8644.06	7775.18	8337.44	3139.11	8374.2	5902.45	3829.43	3096.08	5060.03
1700020L24Rik	1.11701	0.200907	0	79.2599	16.5417	812.405	49.6538	475.478	10.9201	8.45669	54.6966	0	0	0	0	0	0	0	14.8684	4.06629	419.226	29.6428	0	0	0	11.0505	0	0	0	0	0	0	0	0	82.691	112.864	0	35.2213	0	0	0	0	0	0	0	0	0	0	10.7726
1700020O03Rik	839.529	975.302	847.313	1406.04	1808.76	902.672	354.865	1487.81	994.355	895.074	1384.3	1288.2	1202.15	618.508	880.109	173.353	863.71	3691.28	836.76	867.779	692.888	1530.07	2122.65	1018.51	1394.59	3058.54	399.294	2756.21	0	731.747	1318.79	5963.74	92.268	235.842	433.377	402.229	569.224	1494.98	5861.44	1288.52	1078.52	1066.26	957.227	798.115	738.861	709.789	5.28198	1306.15	649.213
1700021C14Rik	184.897	66.1988	183.634	372.85	670.993	136.957	306.122	191.122	122.641	93.9138	45.2429	1134.38	36.1693	443.073	215.234	21.7875	146.907	152.31	110.893	217.422	598.271	155.883	259.625	298.508	319.84	327.832	151.874	607.161	2.84766	0	94.1995	0	135.577	0	706.268	365.308	1328.19	553.084	13.6102	288.704	0	0	583.908	1367.15	12.0685	453.624	137.331	232.458	333.73
1700021F05Rik	2654.07	1344.67	1327.9	937.987	1349.08	435.773	2125.55	927.923	1192.81	2600.21	1444.4	788.301	3023.94	1367.6	1556.97	1680.48	544.568	1251.33	1287.36	2008	1149.96	1128.49	947.198	212.887	1292.01	2099.6	1191.46	17711.9	4485.07	570.193	969.47	9983.39	6535.96	0	4711.61	3129.58	4131.47	3470.95	1583.32	1474.83	125.363	686.673	430.752	4536.6	1684.23	1035.33	3840	2194.76	1720.53
1700021K19Rik	973.701	1037.28	688.83	498.071	1360.2	308.153	2009.84	2601.47	759.574	2414.16	1504.49	552.772	2323.4	94.1966	1296.2	2183.49	830.783	1084.09	1603.93	1146.03	681.242	1276.11	2219.31	1355.94	1575.24	1028.31	1657.07	2766.14	3907	1957.66	1281.51	551.122	2984.59	1212.9	777.719	719.209	556.983	1209.91	462.745	365.107	2654.51	12.7951	244.093	904.809	3215.59	1472.94	3892.82	1421.07	331.092
1700022I11Rik	0	0	15.9564	16.1803	0	0	0	0	0	0	0	0	0	0	66.6314	27.4712	0	0	40.2686	46.9698	0	0	0	0	0	0	0	0	0	0	0	0	0	0	5.56467	3.00171	6.12069	79.7983	199.616	47.5955	0	0	0	0	0	0	0	0	0
1700023F06Rik	5.71644	0.200907	62.4734	2.34497	0	0	53.2981	6.61577	6.93003	77.0004	110.068	293.21	0.951824	0	0	0	0	0	0.413011	28.298	0	14.0103	0	0	0	1.84175	0	9.92634	0	0	0	0	0	0	3.3388	0	24.4828	5.50333	154.248	0	0	0	0	0	0	0	0	0	0
1700023L04Rik	18.8577	103.668	88.166	30.9536	73.557	0	251.458	0.122514	67.8303	9.79196	0	0	0	0	87.7233	0	0	59.7295	8.05371	101.906	0	119.751	0	0	80.7677	0	14.2605	0	0	0	0	0	0	0	291.7	61.8352	189.741	158.221	0	77.3427	0	0	0	0	0	0	0	92.5447	325.596
1700024P16Rik	31.2762	3.31496	19.2018	844.658	0	0	2.2777	0.245028	17.8501	68.0986	0	0	5.71094	0	290.014	0	0	0	0.619517	1549.09	0	22.4164	1.53021	0	22.0765	0	0.713024	8.27195	0	0	0	0	0	0	195.431	609.047	0	3492.41	322.107	0.313128	0	0	9.57227	1814.85	2.68189	0	0	171.931	22.2047
1700025G04Rik	2957.9	4404.28	8494.76	7294.26	288.557	1497.19	1461.83	1982.89	147.211	2527.21	8202.47	1744.84	1389.66	1297.82	4372.74	3984.28	1084.07	2834.16	3358.81	2181.85	6022.01	2202.56	2.04028	1359.44	1931.43	958.325	1008.93	11400.4	5276.72	5331.3	2776.92	0	1.88302	4009.32	844.828	1162.56	18.3621	773.493	294.887	742.427	115.413	110.891	2129.83	85.7738	2590.71	160.103	538.762	3007.92	1195.54
1700025K23Rik	687.222	80.6641	783.758	234.262	98.9497	21.7886	2792	1276.97	115.501	1580.96	1844.15	5003.79	654.855	33.8908	674.463	327.76	0	0	161.694	727.45	0	107.51	9.69131	109.751	148.882	38.0629	277.367	1614.69	0	0	9.81245	712.919	527.246	0	120.308	88.2502	97.9311	67.6909	186.005	222.008	0	0	0	163.179	0	0	0	414.478	182.254
1700026J04Rik	59.0699	29.7342	141.985	71.0525	0.644483	0	318.877	37.9794	1065.33	3.11562	1.35053	0	4.75912	0	0	0	0	0	358.494	68.463	0	10.7658	0.255035	92.6271	0	100.069	644.574	56.2493	0	0	0	0	2483.7	0	41.4012	63.9364	287.673	21.7381	4.53672	0	0	0	0	0	0	0	0	30.2634	490.042
1700026L06Rik	28.1223	0	23.529	8.67638	0.214828	242.788	461.917	2.20526	0	2.67053	9.45374	0	4.75912	0	12.9428	0.947284	0	268.783	0.206506	6.22391	582.258	1230.1	103.034	245.578	405.992	0	991.817	0	0	0	0	0	0	0	9.90512	35.7203	0	14.5838	335.717	0.626256	0	0	9.57227	1.04602	9.38661	4776.4	2704.37	1.3158	1.53894
1700028E10Rik	36.1384	4.11859	53.0078	482.829	563.407	264.576	118.896	123.862	52.2902	60.9772	170.167	0	0	31.3989	175.447	329.655	15.1973	0	51.0069	46.7208	82.9718	67.1018	283.088	97.2973	110.921	61.3918	115.51	1.65439	150.926	0	327.736	73.3143	0	741.218	125.205	146.784	0	107.59	222.299	68.5751	137.302	12.7951	57.4336	289.748	20.1142	0	0	185.089	106.846
1700028J19Rik	59.6613	121.046	116.833	14.5388	93.0634	0	238.247	90.0479	172.831	120.174	451.754	0	0	0	87.7233	0	0	125.432	117.089	50.7871	366.823	42.6207	73.96	324.195	71.0756	0	149.735	74.4476	498.341	0	433.71	15729.7	361.54	0	519.852	1193.78	0	249.301	68.0508	334.421	47.7573	0	0	254.183	308.417	0	0	95.1763	481.029
1700028K03Rik	52.1051	52.5371	7.57254	24.8567	93.2353	46.6899	348.943	70.5682	54.3903	308.892	361.268	211.496	0	0	0	0	0	0	51.4199	43.0694	0	0.737382	509.559	0	58.6912	672.854	7.13024	143.932	609.4	0	0	0	0	0	55.9806	75.9432	104.052	12.1073	4.53672	0	0	0	0	21.9665	37.5465	53.3676	0	253.073	93.4356
1700029F09Rik	1206.63	2178.03	4639.8	5113.91	1327.46	4818.4	906.523	1284.93	2117.02	2562.82	1960.3	14.4201	2387.17	12108.5	5994.43	9823.34	9650.26	6417.93	2997.84	2281.85	8492.24	2987.73	11298.3	11321.1	2697.37	1534.79	1478.81	990.98	8420.54	3468.67	2998.68	429.774	3766.04	3537.63	3814.69	4695.27	1077.24	958.68	2536.03	10533.9	14152.1	7719.74	2297.34	1715.48	1949.73	1462.27	8044.45	1146.94	2833.41
1700029G01Rik	502.456	1724.48	859.483	2186.68	94.782	87.1545	343.476	5.39062	1676.23	13.3527	2.70107	663.327	1191.68	460.018	838.405	2013.93	0	546.525	1078.78	591.271	0	96.5971	1.02014	162.681	64.6142	1908.06	683.077	946.311	1571.91	0	4070.2	1112.36	120.513	0	1281.99	1194.38	165.259	4016.05	4559.4	1524.31	0	0	0	111.924	885.024	0	137.331	1350.01	579.081
1700029H14Rik	16.7551	0.803627	12.711	0.468994	18.69	0	1.82216	18.8672	0	43.6187	0	0	67.5795	227.268	222.424	62.5208	22.7959	2.98647	30.1498	146.718	0	209.122	20.4028	279.049	23.6919	225.922	0	0	0	0	0	0	0	0	34.1671	9.00512	0	0.825499	0	219.503	0	42.6505	0	0	0	0	0	9.21061	20.6658
1700029I01Rik	78.519	65.9979	88.4364	41.2714	190.638	1058.3	0.911078	7.22834	49.7702	7.12142	0	0	40.9284	0	19.1745	0	0	8.95942	43.7792	88.0476	0	445.969	109.41	7.00541	196.804	0	0	150.55	0	0	64.7622	5.05616	173.238	0	61.6566	52.5299	0	29.1676	272.203	0	0	0	272.81	12.5523	231.983	1419.58	5.28198	9.64921	47.927
1700029I15Rik	20.0404	43.195	53.0078	34.471	29.947	0	73.7973	109.895	4.83002	0	37.1397	0	2.85547	0	0	0	0	0	0	122.404	0	127.862	3.82552	4.28108	0	0	0	160.476	0	0	0	0	0	0	33.9445	20.4116	1242.5	93.8317	195.079	0	0	0	0	267.782	0	0	0	25.8774	18.6871
1700029J07Rik	519.014	335.313	297.493	587.18	972.096	3.11266	1902.33	326.5	270.481	497.609	199.204	6364.09	136.111	779.49	155.313	658.363	359.668	0	474.963	192.692	0	17.8447	173.424	243.633	6.99987	383.085	1029.61	1449.25	205.032	864.792	211.949	0	1048.84	0	210.345	267.452	55.0862	64.6641	508.113	357.592	57.7067	0	0	306.485	485.422	0	1098.65	271.932	320.099
1700029J11Rik	1.18271	0	44.8943	7.97289	12.7178	0	0	5.1456	36.3302	0	0	0	134.207	0	0	0	0	0	45.0182	47.8826	0	141.282	0	1.94595	57.6143	27.0124	0	0	0	0	0	0	0	0	35.6139	20.1114	0	16.2348	13.6102	0	0	0	0	0	0	0	0	56.1409	15.1695
1700030C10Rik	295.35	717.94	333.733	642.052	359.02	964.925	2.2777	147.017	126.631	74.7749	102.641	0	256.992	48.8427	410.334	335.339	2.53288	352.404	373.155	467.042	1000.03	92.0253	85.6916	212.887	93.9598	11.0505	59.181	347.422	310.395	0	0	0	0	0	444.729	355.402	1009.91	157.946	1288.43	1.87877	0	477.685	0	279.288	1025.82	0	0	111.843	118.718
1700030J22Rik	12.4185	7.53401	29.2084	18.0563	131.947	12.4506	304.3	88.7003	10.71	272.394	139.105	0	27.6029	0	3.35554	0	0	53.7565	22.5091	30.4557	0	69.3139	6.88593	0	73.2294	177.422	0	0	99.6683	0	0	0	0	0	75.6795	51.6294	342.759	94.6572	27.2203	15.6564	0	0	0	0	0	0	0	31.5792	0.219848
1700030K09Rik	1805.54	2174.41	1143.72	809.249	2343.47	1724.41	2251.27	1324.01	762.304	1760.77	3888.19	1542.96	1816.08	777.496	861.414	616.682	1947.78	32.8512	1153.33	1592.24	0	355.861	4820.41	541.752	1327.01	2517.68	1625.7	850.357	1170.39	0	2129.3	12.6404	1877.37	1061.29	959.127	1240.31	1083.36	470.535	1311.11	1061.19	5173.7	0	0	537.655	535.037	37.3573	2218.43	2875.47	1168.27
1700034F02Rik	13.0098	0.904081	27.3152	7.7384	95.2117	0	5.92201	57.5817	0.420002	0	0.675267	0	0	0	0	0	0	0	14.8684	33.5261	0	26.6932	102.269	19.8487	0	74.284	1.42605	64.5212	0	0	0	0	0	0	15.3585	65.1371	42.8449	23.114	0	0	0	0	0	0	0	0	0	0	0
1700034H14Rik	4708.38	3374.73	4092.96	2285.41	4740.69	1939.19	4493.44	3401.97	2483.26	2013.14	4332.51	9531.72	4297.48	3627.32	3206.93	3019.94	6349.92	1541.02	2276.93	4155.33	0	1499.39	1522.05	3988.41	2523.45	3518.36	2834.99	9539.22	6840.09	845.786	3141.95	8815.42	1050.73	1415.05	3447.31	2703.34	1517.93	1068.47	1097.89	2889.23	1263.58	1676.16	3082.27	4209.19	1425.42	1024.66	961.32	4119.34	2832.31
1700034H15Rik	5.91356	75.8423	4.05672	3.75195	3.05055	0	0.455539	0	80.6404	125.515	0	0	0.951824	0	0	0	0	0	47.9093	31.7834	0	153.67	0	0	36.3455	0	1.42605	0	0	0	0	0	0	0	16.5827	9.90564	0	168.677	258.593	0	0	0	0	0	0	0	0	0	47.2674
1700034J05Rik	10.513	65.3952	1.62269	88.4053	0	0	0	6.86079	120.331	3.11562	39.1655	0	0	0	9.58725	487.851	0	0	102.633	12.8627	0	1.47476	0	56.8216	4.57684	1.22784	0	0	8.54299	0	0	0	0	0	18.9199	5.1029	0	26.6911	0	17.222	0	0	0	11.5062	10.7276	0	0	37.7197	71.4508
1700034P13Rik	70.5028	82.1709	52.1964	68.4731	76.9943	21.7886	112.063	132.438	84.2104	141.538	199.204	115.361	79.9532	122.107	50.3331	62.5208	40.526	5.97295	58.8541	72.8612	113.54	22.7114	65.5439	127.654	31.4994	112.347	54.1899	9.92634	65.4963	38.0128	147.187	37.9212	54.6076	0	126.875	59.1336	269.31	206.65	204.152	80.1608	29.8483	17.0602	33.5029	453.974	155.55	10.6735	42.2558	63.1585	70.7912
1700037C18Rik	325.706	328.382	437.044	478.139	793.789	519.814	593.567	684.119	506.942	417.938	515.904	139.395	605.36	315.484	177.364	24.6294	1084.07	0	223.026	301.403	1.45565	293.773	571.277	310.573	232.88	644.614	1.42605	552.566	0	0	486.697	4694.65	1110.98	0	556.356	836.576	3696.9	652.97	117.955	183.493	1255.62	0	416.394	15.6903	126.049	0	396.148	254.827	368.466
1700037H04Rik	1541.86	1662.7	2210.37	2147.99	715.978	3196.7	937.044	1050.68	1453.84	9632.17	1506.52	769.075	1690.44	966.388	1070.9	2885.43	838.382	436.025	1927.94	1704.85	1740.95	1730.34	1697.51	1517.06	1787.12	1407.1	2135.51	1010.83	1028.01	2062.2	985.17	644.661	3404.5	0	3279.59	2246.18	19323	2097.87	2204.85	525.742	1158.11	904.19	1962.31	1804.39	1236.35	1691.75	1098.65	1747.82	2260.7
1700040I03Rik	1595.87	864.904	1807.4	487.05	865.842	2101.05	3068.06	2598.65	4745.39	2514.31	2258.09	1398.75	1943.62	802.416	1563.2	1482.5	2535.41	238.918	1637.59	1981.11	299.863	985.438	2474.86	1384.74	900.829	1396.66	1028.18	3955.65	1201.71	9.50321	129.524	2836.51	1120.4	0	1869.06	2156.43	4247.76	642.789	1506.19	541.399	3412.65	690.938	1737.37	2153.76	1205.51	5.33676	744.759	1707.91	2807.25
1700040L02Rik	83.7755	41.0854	121.701	428.895	0	0	1037.26	0.367543	79.8004	251.03	41.1913	1148.81	450.213	0	0	0	0	0	1.03253	0.414927	0	43.8005	43.8659	161.124	18.8458	0	75.5806	4991.3	0	0	0	6871.32	837.944	33.6917	1408.42	920.924	0	322.77	4.53672	0	0	0	9.57227	1071.13	0	0	0	11.8422	0.219848
1700045H11Rik	0.657063	0	14.0633	0	0	0	0	0	0	0	0	0	0	0	0	0	0	0	0.206506	8.79646	0	0	0	0	0	3.06959	0	0	0	0	0	0	0	0	192.649	268.953	24.4828	648.842	122.491	0	0	0	0	37.6568	0	0	0	6.14041	0
1700045I19Rik	0	0	108.45	0	0	0	186.771	0.245028	0.420002	1032.61	95.2126	0	0.951824	0	0	0	0	0	0	13.4436	0	13.4204	0	0	0	830.631	0	0	0	0	0	0	0	0	0.445174	4.20239	0	0.550333	36.2938	0	0	0	0	0	0	0	0	2.193	1.53894
1700047G03Rik	0	0	17.8496	67.5351	0	0	0.911078	16.0494	4.83002	0	10.129	0	57.1094	0	19.6539	45.4697	0	0	83.6347	33.7751	403.214	135.678	3.82552	206.66	0	0	0	0	0	0	0	0	0	0	86.8089	84.348	0	39.624	31.757	16.2827	0	0	0	0	0	0	0	0	0
1700048O20Rik	223.007	0.703174	195.534	4.45544	32.2671	0	244.169	45.2077	84.0004	1122.07	204.606	918.083	0.951824	219.294	106.418	0.947284	433.122	0	20.2375	238.417	0	36.7216	393.263	24.1297	0.538451	115.417	0	52.9405	150.926	0	0	0	0	0	15.0246	0.300171	0	6.05366	54.4406	273.048	97.5044	0	0	411.087	0	0	644.401	419.741	26.8215
1700049E15Rik	0	0	1.89313	2.34497	0.257793	0	0	0	0	0	0	0	0	0	0	0	0	0	0	0	0	0	0	0	0	0	0	0	0	0	0	0	0	0	0	0	0	0	0	0	0	0	0	0	0	0	0	0	0
1700049G17Rik	404.159	270.822	114.129	189.708	1021.38	666.109	1060.04	434.925	94.7104	693.894	1091.23	211.496	10.4701	194.374	103.063	0.947284	2036.43	0	681.675	315.262	0	324.301	167.813	153.73	131.651	613.304	584.68	617.088	85.4299	456.154	182.512	78.3705	131.811	0	424.918	211.32	642.673	520.065	372.011	30.6866	159.191	0	90.9365	124.477	1029.85	0	0	1128.96	135.427
1700052K11Rik	630.386	360.829	398.64	425.377	786.313	441.998	438.684	246.254	813.544	427.285	759.675	783.495	1016.55	618.01	325.487	487.851	656.015	5.97295	469.181	223.895	458.529	244.958	393.008	488.043	119.536	492.976	471.309	234.923	2935.94	456.154	2227.43	204.775	1779.45	0	632.035	318.781	10405.2	219.858	127.028	340.997	195.009	0	306.312	217.573	205.165	5.33676	0	637.287	829.488
1700052N19Rik	1261.36	1289.82	694.239	640.411	2271.98	2073.03	548.014	1005.23	471.032	1208.86	1588.9	677.747	444.502	1153.78	537.365	52.1006	420.457	474.849	461.746	1344.95	698.71	1659.26	2639.61	1508.5	848.599	1176.88	1834.61	2460.08	1435.22	9.50321	365.023	447.47	1094.03	707.527	1193.29	936.533	5416.81	722.037	190.542	569.58	491.502	520.336	2134.62	4047.06	870.273	5.33676	1869.82	1190.8	479.49
1700054A03Rik	0	0	21.9063	9.14538	0	0	0	0	0	0	0	0	0	0	0	0	0	0	0	0	0	0	0	0	0	0	0	0	0	0	0	0	0	0	83.5814	15.6089	0	25.3153	267.666	0	0	0	0	0	0	0	0	0	0
1700054N08Rik	122.279	103.266	58.6872	124.518	56.0271	3.11266	5.46647	1577.13	182.701	3837.11	796.14	0	533.973	288.072	224.342	0	1532.39	164.256	189.572	66.3054	0	101.316	856.661	616.087	428.877	292.225	0	0	0	0	239.424	68.2582	11.2981	0	513.953	303.773	1126.21	727.815	1383.7	500.692	131.332	690.938	301.526	56.4852	0	165.439	1600.44	238.599	127.072
1700056E22Rik	23.5228	0	21.3654	34.471	83.525	37.3519	30.5211	80.7369	29.4001	0.890178	27.0107	0	26.6511	119.116	8.62852	0	182.367	68.6889	13.6294	39.999	0	181.986	95.638	300.065	180.112	0	0	64.5212	0	674.728	0	128.932	0	0	161.375	298.97	514.138	384.683	503.576	16.9089	185.059	264.433	28.7168	30.3346	132.754	5.33676	0	32.0178	36.7147
1700061G19Rik	80.293	0.703174	84.1092	54.8723	18.1315	9.33798	14.5773	7.47337	4.20002	3.11562	94.5374	0	114.219	0	69.9869	358.074	0	0	5.16264	100.993	0	57.3683	1.27517	0.778379	5.65374	0	0	0	0	0	0	0	0	0	40.6221	22.2126	0	6.60399	68.0508	100.201	0	0	0	0	0	0	0	292.108	94.7547
1700064M15Rik	0.0657063	0	12.4406	0	19.936	0	53.2981	1.83771	0	0	34.4386	0	9.51824	0	0	0	0	0	0	17.4269	0	90.2556	0	0	56.2682	0	0	33.0878	0	0	0	0	0	0	0	0	0	0	0	0	0	0	0	0	0	0	0	114.913	0.219848
1700065D16Rik	30.6191	20.6934	55.1713	88.4053	189.607	719.025	47.8316	10.6587	62.3703	50.295	301.844	0	1.90365	318.474	130.866	43.5751	273.551	0	5.98866	22.4061	56.7702	108.395	203.263	67.3298	49.5375	1.84175	0	0	0	0	0	0	0	0	314.07	293.867	85.6897	89.9794	340.254	402.996	0	0	0	0	0	0	0	152.633	94.9745
1700066B19Rik	8.34469	50.1262	16.2269	5.86242	676.665	1039.63	66.9643	9.06605	15.1201	44.0638	0	9.61343	9.51824	23.4246	0	908.446	549.634	167.243	145.38	49.2104	446.883	65.7745	312.927	24.9081	219.957	0	0	76.102	5.69533	0	0	0	0	0	2501.77	8586.99	6.12069	468.333	539.87	0.626256	348.23	1701.75	2555.79	4.18409	2.68189	0	5.28198	5.26321	90.1379
1700066M21Rik	351.266	306.483	172.275	203.778	749.749	1540.77	3088.56	6379.68	588.213	885.282	8125.49	1047.86	283.643	101.174	347.538	323.971	2.53288	0	250.491	334.016	234.359	403.938	384.082	383.741	408.685	845.365	400.72	173.711	1164.69	9.50321	25.5124	508.144	1039.43	0	456.192	279.759	30.6035	247.65	190.542	0.313128	286.544	12.7951	0	5410.03	1385.2	1467.61	0	673.252	203.8
1700067G17Rik	0	0	0.270448	14.0698	0	0	0	0	0	0	0	0	0	0	0	0	0	0	0	0	0	0	0	0	0	0	0	0	0	0	0	0	0	0	74.7892	22.5128	55.0862	58.6104	77.1242	0	0	0	0	0	0	0	0	0	0
1700067K01Rik	32.1304	25.8165	17.8496	1.17248	304.454	0	316.144	51.8235	16.1701	72.9946	93.8621	0	0	0	0	0	0	0	30.3563	61.9071	0	17.8447	34.1746	39.3081	25.5764	54.0248	1.42605	26.4702	22.7813	0	0	0	222.196	0	48.7465	81.0461	18.3621	58.3353	117.955	0	0	0	0	102.51	0	0	10.564	199.563	0.219848
1700071M16Rik	0	0	40.2967	212.689	0	0	921.556	25.1154	0	57.4165	20.9333	2768.67	2.85547	0	0	0	0	0	0	1.82568	0	497.143	0	0	125.998	0	326.565	0	0	0	0	0	0	0	0.111293	1.50085	0	2.75166	0	0	0	0	0	0	0	0	0	0	0
1700081L11Rik	3024.72	3107.02	2529.23	2323.63	7374.74	4202.09	3770.5	2994	3598.79	6144.9	4106.3	2759.06	4028.12	2127.15	2263.07	3969.12	1968.04	3111.91	3093.25	2502.92	2259.16	3046.57	5384.54	4571.81	3828.39	3674.91	4183.31	3050.7	3909.84	3307.12	4288.04	9096.03	4624.7	2307.88	2747.95	2191.25	6983.71	4840.45	3361.71	3417.48	7907.8	3646.62	7346.71	1899.58	5733.88	7156.59	3739.64	5990.41	4651.55
1700084C01Rik	66.7576	0	15.4155	1.64148	0	0	5880.55	52.191	0	50.7401	118.847	17669.5	2.85547	0	0	0	0	0	0	67.5502	0	0	0	0	0	100.069	0	0	11.3907	0	0	0	0	0	13.2439	0.300171	0	6.32883	4.53672	0	0	0	0	0	0	0	0	83.7727	0
1700084E18Rik	49.0826	275.142	17.5791	63.5486	94.2235	0	42.8207	19.4798	84.2104	233.672	98.589	57.6806	35.2175	0	3.35554	342.917	0	0	141.25	17.012	0	21.679	85.6916	47.4811	15.0766	162.688	81.2848	31.4334	0	0	0	0	0	0	58.7629	55.8318	214.224	51.4561	54.4406	2.81815	109.444	0	0	27.1966	32.1827	0	0	115.791	252.166
1700084J12Rik	25.1655	0.200907	36.24	11.7248	4.33952	0	86.0969	0.122514	0.210001	0.445089	1.35053	4.80672	0	0	21.5713	0	0	0	0	10.4562	0	18.582	0.255035	0.778379	32.5763	0	0	155.513	0	0	0	0	0	0	36.0591	51.3292	0	0.825499	0	26.6159	0	0	0	6.27613	0	581.706	105.64	111.843	0.659545
1700085C21Rik	14.5868	0	41.9194	0	0	0	24.5991	0	1.26001	148.215	2.70107	0	22.8438	0	0	0	0	0	0	0	0	0	0	0	0.807677	1.22784	0	0	0	0	0	0	0	0	0.111293	0	0	5.22816	0	0	0	0	0	0	0	0	0	57.4567	49.2461
1700086L19Rik	1.24842	1.20544	200.402	35.878	38.1534	3.11266	537.536	219.178	5.25002	11291	19267.4	14.4201	37.1211	5.98074	2.87617	0	12.6644	0	4.13011	113.026	11.6452	1.76972	3.57048	10.5081	1.0769	4.29742	0	1.65439	0	0	13.7374	60.6739	9.4151	0	16.5827	3.00171	30.6035	11.8322	13124.7	0	0	0	4.78613	1.04602	5.36378	0	0	3.94741	3.07788
1700086O06Rik	194.031	1093.03	119.267	229.338	721.048	728.363	892.401	276.147	261.451	724.605	513.203	927.696	884.244	233.249	147.644	180.931	32.9274	191.134	286.836	288.457	26.2016	179.184	8.92621	100.8	188.996	651.981	668.817	92.6459	1549.13	95.0321	804.621	7.58424	161.94	0	524.86	392.023	410.086	193.717	553.48	153.12	0	0	272.81	208.158	1135.78	405.594	0	466.671	282.285
1700088E04Rik	188.117	4.82176	177.143	42.6784	0.300759	0	1074.62	68.7305	19.5301	130.856	97.2384	716.201	263.655	233.249	108.815	0	0	0	29.3238	184.145	0	25.071	0	0	2.15381	143.657	27.0949	130.697	0	0	8097.23	717.975	436.861	0	76.7925	192.71	0	86.4023	644.214	157.817	0	0	0	26.1506	0	0	0	265.792	20.8856
1700092M07Rik	4.13949	0.401814	2.43403	18.7597	29.7751	0	18.6771	13.8441	7.56004	0.445089	0	0	41.8802	0	0	0	0	0	0	1.65971	0	3.83439	1.02014	0.778379	15.8843	0	12.1214	0	0	0	0	0	0	0	18.6973	84.0478	0	11.557	0	0	0	0	0	0	0	0	0	1.3158	33.8567
1700094D03Rik	161.572	253.143	319.399	281.162	594.729	74.7039	4906.61	208.397	147.841	713.032	286.313	4.80672	141.822	261.657	287.617	462.275	101.315	86.6077	467.941	457.499	301.319	742.397	230.041	228.843	227.765	374.49	79.1457	443.377	122.45	76.0257	794.808	0	137.46	1836.2	330.096	406.431	263.19	331.025	1592.39	146.544	348.23	264.433	4.78613	602.509	863.569	699.115	401.43	309.213	510.708
1700095B22Rik	0	0.200907	36.7809	0	0	0	0.455539	0	4.62002	78.3356	59.4235	754.654	0	0	0	0	0	0	0	53.5256	0	0	0	0	0	0	13.5475	36.3966	0	0	0	0	0	0	0.111293	0	85.6897	3.57716	0	0	0	0	0	0	0	0	0	0	0
1700096K18Rik	529.264	613.067	489.781	730.458	852.651	1030.29	789.449	911.383	406.982	348.059	1624.69	932.503	398.814	137.557	437.658	357.126	0	492.768	821.272	576.085	4.36694	661.579	1395.8	391.524	500.76	144.885	531.203	512.861	304.7	0	0	2437.07	244.793	0	692.245	1117.24	287.673	1652.37	1243.06	39.7673	1189.95	285.758	119.653	751.044	828.704	1355.54	1537.06	842.113	384.075
1700101I11Rik	47.637	0	141.174	58.6242	6.57373	0	99.3075	64.1974	136.921	70.324	12.1548	0	0	197.863	88.2027	4.73642	0	376.296	0	48.0486	0	37.0166	0	93.7946	30.4225	0	1.42605	319.297	0	0	0	0	0	0	29.2702	7.80444	0	32.7448	0	107.716	0	0	0	15.6903	127.39	0	0	9.64921	32.9773
1700102H20Rik	11.8928	0.100453	9.73612	18.9942	40.5595	0	161.716	61.1346	39.0602	44.954	218.786	0	14.2774	0	0	0	0	0	28.7043	5.39405	0	9.14354	151.746	5.83784	0	3.06959	0	14.8895	99.6683	0	0	0	0	0	106.397	56.7323	159.138	13.7583	95.2711	0	0	0	67.0059	9.4142	26.8189	0	0	3.0702	33.417
1700102P08Rik	7.88475	16.8762	68.1528	72.225	27.8417	0	0	3.55291	62.5803	80.5611	23.6343	0	35.2175	107.155	40.7458	106.096	45.5918	98.5536	303.357	114.852	18.9234	55.5986	26.0135	0	5.65374	0	0.713024	23.1615	0	0	0	0	0	0	44.1835	89.7511	0	9.35566	9.07344	55.4237	0	0	19.1445	26.1506	168.959	0	0	4.82461	23.9635
1700105P06Rik	28.9765	42.1904	23.7994	24.6222	9.66725	0	50.1093	15.1918	38.2202	76.1102	223.513	4.80672	417.851	0	0.479362	95.6757	0	0	29.7368	17.261	0	19.3194	0	0	0	39.9046	22.1038	213.416	8.54299	0	0	0	0	0	9.23735	10.8061	91.8104	15.1342	18.1469	28.1815	0	0	0	0	0	0	0	34.6494	27.7009
1700106N22Rik	1302.56	446.616	987.675	1682.51	569.423	329.942	851.403	1962.43	853.024	1025.48	2019.72	4085.71	992.752	618.508	1731.46	1079.9	1286.7	1621.66	1131.65	1456.89	876.299	522.804	745.721	580.281	882.791	430.97	983.261	228.306	0	323.109	488.66	1597.75	372.838	0	1675.86	2182.24	0	1328.23	689.581	772.487	320.372	0	33.5029	378.66	710.701	394.92	422.558	919.307	949.526
1700108F19Rik	22.143	0	44.6239	0.234497	0	0	0	12.0064	38.0102	0	0	0	0	0	0	0	0	0	0	27.4682	0	0	0	0	0	0	0	26.4702	48.4103	0	0	0	0	0	26.3765	184.605	159.138	2.75166	0	0	0	0	0	0	0	0	0	0	0
1700109F18Rik	0	58.7652	50.3033	63.3142	0	0	0	0	0	0	0	0	0	0	28.2824	171.458	0	0	166.65	63.0689	0	0.147476	0.255035	0	0	0	0	0	0	0	308.111	70.7863	3.76604	0	54.979	64.2365	0	15.1342	0	1.25251	0	0	0	0	0	0	0	0	22.4245
1700109H08Rik	31.2105	154.196	151.18	48.0719	103.031	12.4506	135.751	39.8171	147.001	125.515	118.847	28.8403	191.317	277.606	79.0948	112.727	116.512	116.472	30.3563	62.571	37.8468	109.722	95.638	191.87	45.7684	72.4423	54.9029	38.051	0	0	0	0	0	0	38.8414	45.3258	275.431	27.5166	308.497	161.574	292.513	328.409	0	9.4142	50.9559	0	0	73.6849	83.7623
1700110C19Rik	0.854181	8.53854	25.1516	9.14538	410.149	0	85.6414	240.618	0	85.4571	158.688	0	0	0	0	0	0	0	28.4978	41.0778	0	81.8494	114.255	0	17.7689	0	0	66.1756	0	0	0	0	0	0	0	0	0	0	0	0	0	0	0	0	0	0	0	0	0
1700112E06Rik	243.77	546.266	2504.89	1168.03	1484.03	737.701	310.678	529.996	230.581	14.2428	1074.35	4.80672	239.86	309.005	431.426	1066.64	0	274.756	207.332	761.143	969.46	577.518	1.02014	0.778379	486.76	136.904	969.713	160.476	0	427.644	918.445	0	1188.19	50.5376	256.197	57.933	1530.17	82.8251	0	269.916	0	0	1009.87	21.9665	2978.24	448.288	0	258.336	629.646
1700113A16Rik	641.162	877.159	561.72	498.775	732.821	345.505	2014.39	666.355	950.464	1035.28	492.945	2634.08	1024.16	574.151	640.908	591.105	899.171	1042.28	842.749	474.013	489.097	1908.49	1277.47	727.006	470.068	547.001	1135.13	1219.29	1697.21	1530.02	335.586	902.525	1110.98	2846.95	823.349	878.6	3060.35	1244.58	1991.62	693.579	1185.97	669.612	148.37	854.6	1284.63	517.665	887.372	424.565	363.849
1700113I22Rik	381.753	20.4925	686.396	200.964	14.1786	722.137	122.084	23.8903	14.2801	347.169	243.771	43.2604	5191.25	474.97	337.471	14.2093	0	0	305.422	679.817	0	94.5324	11.2215	10.5081	210.265	1747.21	259.541	10176.2	10114.9	0	13.7374	720.503	0	0	862.524	1446.52	1701.55	323.045	1138.72	186.624	31.8382	0	9.57227	163.179	0	474.971	132.049	284.213	22.4245
1700120C14Rik	10.9072	5.22358	15.4155	38.9265	28.4002	0	26.4213	65.3001	29.1901	9.79196	6.75267	33.647	1061.28	0	0.958725	0.947284	0	0	18.9985	15.3523	0	23.0063	31.6243	3.11351	2.42303	1.84175	0	938.039	1067.87	0	0	0	0	0	89.9251	147.684	1248.62	197.294	176.932	9.39384	250.726	119.421	0	18.8284	0	0	258.817	4.82461	26.6017
1700120E14Rik	0	0	0	128.739	0	0	0	0	0	0	0	0	0	0	0	0	0	0	0	0	0	0	0	0	0	0	0	0	0	0	0	0	0	0	124.092	251.543	355	688.742	825.683	0	0	0	0	10.4602	0	0	0	0	0
1700123I01Rik	0.0657063	9.94489	37.5922	21.1047	0.429656	62.2532	18.2216	8.20845	1.26001	0	0	0	248.426	0	0	0	0	0	20.2375	33.3602	0	17.8447	0	0	78.3447	0	0	0	0	0	0	0	0	0	31.0509	1.50085	61.2069	100.436	0	0	0	0	0	0	0	0	0	1.3158	412.216
1700123M08Rik	169.982	98.2434	174.439	90.2813	134.053	0	205.448	523.993	54.8103	245.689	162.064	62.4873	5.71094	520.324	67.1107	0	0	53.7565	26.2262	212.692	0	36.4267	255.29	66.1622	114.421	217.941	1.42605	1340.06	0	0	0	0	0	0	106.953	103.559	85.6897	88.3284	1129.64	282.755	0	0	0	0	0	0	0	293.424	109.485
1700123O20Rik	5494.29	6036.35	4836.96	4911.54	6564.41	5574.78	6345.66	3846.33	6115.65	4684.56	5774.88	10608.4	6322.96	4665.47	4503.13	7828.36	5982.65	4434.91	6405.18	5384.18	9950.8	5131.3	9000.68	7085.97	3087.75	5429.49	5702.77	3705.83	7574.79	7669.09	6052.32	5435.37	7432.28	1229.75	5514.03	6464.48	16354.5	5296.4	8746.79	3592.21	6403.45	6521.26	6667.08	12159	4268.23	6249.34	7944.09	5703.56	8278.61
1700125D06Rik	0	0	0	25.3257	0	0	0	45.3303	0.420002	102.37	0.675267	307.63	26.6511	0	0	0	0	0	65.8753	35.9327	0	24.3336	0.510069	0	0	0	0	0	0	0	0	0	0	0	94.043	83.1473	0	0.275166	49.9039	0	0	0	0	0	0	0	0	13.158	40.672
1700125H20Rik	0	0	2.97493	47.6029	0	0	21.8659	13.7216	36.9602	0	0	0	0	0	0	0	0	0	21.8896	33.7751	0	3.83439	0	0	0	0	0	0	0	0	0	0	0	0	12.91	13.2075	6.12069	16.51	0	0	0	0	0	0	0	0	0	0	0
1810006K21Rik	7085.04	3175.83	8140.21	3535.98	4357.91	5814.45	3575.98	11280	3545.87	3792.6	4730.92	3249.34	3194.32	6216.48	7442.1	2078.34	12742.9	6904.73	3048.43	7237.16	8500.97	7550.5	5821.67	5543.22	5294.59	4156.22	3527.33	10594.7	4661.63	4846.64	2600.3	3776.95	5423.1	1280.29	8074.9	11281.9	8838.28	6827.43	5239.91	4927.7	7205.38	7472.36	6269.83	11922.6	4717.44	10710.9	5778.48	5344.79	7793.63
1810008A18Rik	3052.78	2861.21	2010.51	11837.4	3574.99	5453.38	2060.86	2899.3	3130.27	3744.98	3797.7	7080.29	5246.45	1906.36	2159.53	1601.86	1484.26	2287.64	3480.24	3641.57	1981.13	3148.03	3983.64	2861.71	2953.68	1822.11	2327.31	3477.53	4613.22	152.051	1536.63	465.167	4229.26	1010.75	3066.25	2931.77	1432.24	5269.99	1674.05	2738.62	1585.94	1305.1	3943.77	5435.13	3907.51	4018.58	3554.77	2964.5	2378.1
1810009A15Rik	3661.55	3813.21	2821.85	2198.41	2225.36	2253.57	2622.99	2124.64	3051.1	2323.36	1459.25	8652.09	2221.56	1779.77	2061.26	992.754	6159.95	2371.26	4943.33	2894.2	4716.29	3278.55	4074.94	2747.68	2838.45	3259.29	3501.66	4781.19	1221.65	902.805	2023.33	2651.96	7865.38	4278.85	3844.3	2454.8	3017.5	3409.31	961.784	1052.42	3219.63	2008.84	3446.02	6673.62	2361.4	1894.55	2313.51	2500.02	3158.78
1810010D01Rik	0	0	1.08179	28.6086	0	0	0	16.5394	2.31001	9.34687	58.0729	0	0.951824	0	0	0	0	0	6.60818	7.63466	0	202.338	0	0.389189	0	0	0	0	0	0	0	0	0	0	21.5909	3159.6	0	24.2146	0	0	0	0	0	0	0	0	0	0	9.01379
1810010H24Rik	2054.31	48.6194	544.411	407.79	467.422	0	2924.11	332.871	98.0705	455.771	4005.68	8858.78	707.205	651.9	894.97	31.2604	0	2.98647	227.569	2223.93	315.875	190.835	287.679	13.2324	101.498	1108.74	554.733	215.071	0	0	0	0	0	0	238.836	558.017	36.7242	211.328	857.44	168.15	0	0	0	737.446	0	0	0	28984	257.882
1810011H11Rik	2.16831	55.3498	0.811343	1.64148	14478.3	7146.67	5.01093	64.0749	1.89001	0.445089	2.0258	0	0	0.99679	7.19044	12.3147	686.409	2066.64	0.413011	3.65136	1.45565	1542.6	0.510069	278.27	9015.02	4587.81	2.8521	1.65439	11.3907	4171.91	0	0	24.4793	10680.3	44.8513	36.0205	6.12069	18.9865	4.53672	1.87877	0	541.661	12779	2.09204	2.68189	976.626	36.9738	0.438601	0.659545
1810011O10Rik	1403.68	119747	4791.25	103697	1369.18	1637.26	921.556	12.4964	14677	48.9598	12.8301	4.80672	6459.08	30437	366.712	153166	70.9205	5990.87	71519.7	388.787	5.82258	563.213	18.6175	9.34054	3720.43	16510.7	8353.79	3922.56	18210.8	0	109658	5961.21	96.034	16.8459	22283.3	15615.2	9676.82	55528.9	2318.26	66222.2	127.353	85.301	263.237	3774.05	67284.6	282.848	1383.88	6500.94	19089.9
1810012P15Rik	164.069	394.581	289.92	630.562	1289.53	949.362	523.87	1229.55	875.704	3657.3	2027.83	1004.6	108.508	51.8331	165.859	258.609	1233.51	191.134	255.447	164.394	922.88	662.759	499.103	286.443	670.372	556.823	1364.02	5947.53	0	0	786.958	768.536	77.2038	1280.29	1348.43	663.377	13496.1	658.473	1138.72	35.3835	175.11	541.661	291.954	1026.15	1465.65	384.246	126.767	875.008	1463.09
1810013A23Rik	0	0	18.6609	235.435	46.7895	0	48.7427	19.4798	2.94001	7.12142	0	0	0.951824	0	0	0	0	0	0	3.65136	75.6936	104.118	0	0	0	0	0	0	0	0	0	0	0	0	149.356	198.113	6.12069	49.2548	4.53672	0	0	0	0	0	0	0	0	0	0
1810013D10Rik	5098.15	3783.88	6967.82	4449.58	4923.51	3112.66	15545.7	9364.74	5701.53	4169.15	8355.75	8652.09	4965.66	2113.69	1761.66	4856.73	12446.5	1735.14	4689.53	6012.05	2272.26	6669.92	5640.6	3077.71	7476.94	4043.88	4141.96	31607.1	7526.38	3611.22	2158.74	15868.8	15406.9	741.218	10333.8	17447.1	9376.9	18063.8	7739.64	1877.2	3717.11	2942.88	9141.51	14503.1	4650.4	3452.88	12977.8	5703.56	6883.68
1810013L24Rik	4504.62	5273.7	16170.3	10270.5	6207.53	4055.8	9684.76	3660.23	5834.04	2849.9	3890.89	7315.82	3424.66	10507.7	14062.1	19754.7	5511.54	13988.6	6110.7	5771.89	11952.3	8922.33	10734.1	9482.99	5445.36	6384.13	5455.35	4933.39	2175.62	10225.5	4668.76	2839.03	5807.23	15700.4	4118.52	8279.91	1046.64	7098.19	10434.5	15838.3	14569.9	11562.5	6241.12	3968.61	4128.77	603.054	3454.41	10050.1	7290.84
1810014B01Rik	378.797	346.866	387.281	224.413	1073.54	3.11266	2882.2	611.713	514.712	906.201	1945.44	730.621	290.306	96.1902	460.188	279.449	68.3876	2.98647	459.268	464.47	53.8589	210.449	150.215	273.6	146.728	208.732	723.72	1273.88	495.494	304.103	315.961	935.39	1237.14	1010.75	1155.34	633.06	0	93.0062	612.457	209.796	23.8786	0	435.538	678.868	1.34094	0	5.28198	407.899	413.755
1810014F10Rik	875.273	243.499	1177.26	2531.16	151.754	538.49	3237.97	1010.13	171.151	4231.9	1345.81	2033.24	2144.46	530.292	473.61	195.141	0	292.674	470.007	772.346	0	455.702	27.5437	145.946	731.755	1469.1	559.724	8506.88	2152.83	0	215.874	4267.4	3436.51	0	3676.02	4034.9	783.449	4743.32	1796.54	333.481	3.97977	4.26505	626.983	8183.03	850.159	58.7043	0	942.114	480.589
1810019D21Rik	17.3465	55.1489	107.097	2377.09	23.8888	0	2.2777	12.7415	22.4701	0.445089	0	658.52	8.56641	0	0.479362	95.6757	0	5.97295	330.202	160.992	0	101.464	0	5.05946	98.2674	0	2.8521	24.8159	0	19.0064	1.96249	7197.45	3131.46	67.3835	2113.57	1961.32	599.828	991.149	1106.96	23.4846	7.95954	0	52.6475	1973.84	1.34094	53.3676	0	251.318	21.5452
1810019J16Rik	1.90548	1.60725	23.529	5447.13	41.161	0	3.18877	21.8075	7.77004	85.012	0	4.80672	2.85547	3.48876	37.3903	8.52556	2.53288	0	1.03253	3.56837	2.91129	28.6104	60.4432	27.2433	0.807677	0	3.56512	1.65439	0	0	74.5746	8603.06	4875.14	0	6158.42	7778.03	3329.66	6689.3	7090.89	45.0905	3.97977	0	4.78613	1552.3	8.04567	0	36.9738	170.616	2.19848
1810020D17Rik	4242	3204.97	4477.53	2228.19	1969.84	3778.77	9110.78	8034.85	4685.96	4840.34	4753.88	6537.13	4267.98	1866.49	3486.88	2608.82	1091.67	1105	3077.55	3622.98	1671.08	1435.09	1520.52	2356.54	2036.42	3687.8	4859.26	15114.5	2329.39	1330.45	1811.38	2118.53	6993.54	791.756	6809.6	4405.01	2833.88	12473.3	2581.39	1292.91	346.24	1283.78	713.134	8534.5	1625.23	1734.45	285.227	3396.96	3896.59
1810020O05Rik	0	0	2.16358	85.1224	0	0	2.73323	13.5991	0	57.8616	0	0	0	0	0	0	0	0	0	30.5386	0	17.8447	0	0	0	0	0	0	0	0	0	0	0	0	1.44681	2.1012	6.12069	1.37583	199.616	0	0	0	0	0	0	0	0	0	0
1810021B22Rik	382.87	159.219	345.632	295.466	1434.88	214.774	2115.98	165.394	63.6303	155.781	771.155	105.748	193.22	51.3347	369.588	0.947284	0	98.5536	13.0098	511.771	0	182.428	47.1814	0	262.764	746.524	514.091	2251.63	777.412	0	0	616.852	367.189	0	563.924	696.096	165.259	321.394	517.186	21.919	0	42.6505	210.59	1087.86	258.802	0	0	413.162	0
1810022K09Rik	3374.02	2551.72	2981.15	3080.82	1982.69	1948.53	2920.46	2774.7	2530.51	3555.82	2006.89	2494.69	2785.99	4822.97	3027.65	2937.53	5552.06	5781.81	2144.97	3253.53	1944.74	2924.9	3162.43	2876.11	2528.84	2615.29	2720.9	4437.08	1879.46	4171.91	1281.51	7594.35	6227.15	1280.29	4423.91	3330.69	8244.57	4125.85	2699.35	5182.9	2933.09	2362.84	3680.54	5713.37	2038.24	3479.57	2619.86	2619.32	3756.11
1810024B03Rik	84.8268	41.2863	60.3098	129.911	241.466	15.5633	249.635	182.301	60.6903	39.6129	110.068	48.0672	71.3868	41.3668	92.5169	28.4185	357.135	247.877	49.3548	72.9442	11.6452	75.508	198.417	50.2054	89.6522	60.1639	38.5033	21.5071	299.005	133.045	345.398	0	158.174	0	114.632	93.6533	42.8449	77.5969	190.542	53.5449	91.5347	183.397	205.804	286.61	45.5921	10.6735	0	158.773	101.57
1810026B05Rik	2021.45	2595.41	2238.5	2980.46	3392.22	2063.69	4584.09	3580.11	5034.56	4532.34	3185.23	3758.85	5229.32	2957.47	2972.05	4436.13	6185.28	1570.89	2683.95	2044.84	5161.72	3340.64	7013.96	8923.33	2408.49	3148.17	2167.59	2415.41	2243.96	2404.31	2690.57	2601.39	888.786	9955.91	3089.73	2684.43	5777.93	4855.86	3384.39	3499.83	7748.61	16181.6	3067.91	1267.78	2500.86	1520.98	4727.37	2705.73	2880.02
1810026J23Rik	4010.84	3262.93	2072.98	1691.19	3833.69	2325.16	9277.97	9348.2	4186.58	5244.93	8351.02	11613	3598.85	1813.66	1754.47	2100.13	724.402	585.349	2747.97	3161.83	2336.31	1100.91	1136.43	2545.3	3408.94	4428.19	4872.81	8300.08	11328	893.302	4374.39	11227.2	4487.24	16.8459	3129.01	2466.2	1230.26	1491.95	4173.78	1954.23	2155.05	2379.9	751.423	7220.69	1304.74	1366.21	4394.61	4389.52	2120.22
1810027O10Rik	5773.74	6860.16	6531.31	3184.7	2926.47	5515.64	8337.28	6918.62	5351.87	6405.27	5632.4	9507.68	4698.2	4239.35	4766.78	7397.34	4571.84	9918.08	4988.76	5847.57	1749.69	7532.95	1056.1	1031.35	5698.16	3833.3	6107.77	12631.3	4954.94	3896.32	3654.16	7773.85	19159.7	353.763	5630.22	4695.57	8256.82	7891.5	5439.53	3629.47	1345.16	1479.97	2101.11	29388	8995.06	9878.34	3713.23	4068.9	8311.81
1810029B16Rik	600.884	290.813	803.23	974.569	473.352	532.265	381.286	2284.15	498.542	585.737	571.276	394.151	142.774	2651.46	1518.14	252.925	676.278	1078.12	343.625	797.739	237.27	408.805	824.527	536.303	319.84	585.063	403.572	1700.71	0	1644.06	0	32.865	114.864	0	1286.11	906.816	520.259	205.274	99.8078	2131.46	2055.55	592.842	856.718	805.437	555.151	117.409	998.294	348.687	522.14
1810030J14Rik	151.256	16.9766	24.0698	18.5253	62.7727	68.4785	168.094	403.317	148.471	59.6419	44.5676	14.4201	101.845	170.949	5.27299	0	0	0	141.456	26.6383	68.4154	82.4394	88.752	63.4379	36.8839	12.2784	7.13024	23.1615	17.086	28.5096	64.7622	42.9774	284.336	0	165747	3.99116e+06	1517.93	6776.52	270230	0	0	0	9.57227	6.27613	2.68189	10.6735	0	67.1059	45.7285
1810030N24Rik	1640.09	1628.95	1973.19	2094.53	1456.7	2564.83	3818.33	1497.98	1478.83	2244.14	1978.53	3744.43	2193.95	1181.69	1289.01	1335.67	3677.74	866.077	1097.16	1523.11	1515.33	1161.23	761.533	1948.67	855.33	1455.6	2132.66	8553.2	623.639	228.077	1342.34	4257.29	3858.31	3470.25	2621.63	2870.23	465.173	1772.62	2268.36	311.876	1030.76	29.8553	603.053	3710.24	363.396	1152.74	2878.68	1289.05	1681.84
1810030O07Rik	6419.17	4771.03	3621.02	3218.47	6366.81	4631.64	3807.4	4483.77	4166	2702.58	4077.26	2912.87	1987.41	3645.76	5100.42	3810.93	2735.51	4909.76	3326.6	4322.55	9071.59	3554.04	4115.75	4470.62	6124.62	6950.16	7194.42	5901.21	3115.35	3069.54	4262.53	533.425	2438.51	15633	3715.75	3110.97	1297.59	1124.05	4922.34	2540.41	4907.06	443.565	5863.01	2189.32	4953.45	2385.53	205.997	5373.3	3914.62
1810031K17Rik	3329.27	5377.37	3450.37	1735.04	6526.08	5689.94	2336.46	3756.16	3871.58	1945.48	2281.73	7724.39	2458.56	1391.02	1338.38	5130.49	3969.02	3691.28	4684.58	3099.09	5054	9433.92	5058.61	4577.26	6184.92	2322.45	4718.08	1197.78	3485.54	3582.71	5328.16	1413.2	4592.69	16.8459	3573.85	4432.62	7142.85	4929.06	4355.25	1234.04	3910.12	3271.29	5259.96	2382.84	4528.37	6441.47	5741.51	4063.2	3337.08
1810032O08Rik	280.566	287.096	409.999	1092.99	208.168	158.746	261.479	299.67	551.043	833.651	301.169	0	1828.45	2005.04	1140.88	510.586	1950.31	0	288.488	531.522	62.5928	501.42	459.572	702.098	180.65	434.04	439.223	390.436	28.4766	0	208.024	123.876	3487.35	0	1473.41	802.056	483.535	424.031	13.6102	2508.47	901.418	1889.42	14.3584	378.66	29.5008	0	1177.88	396.056	285.583
1810033B17Rik	0.328531	5.8263	1.35224	0.703491	11.8155	11616.5	2.2777	23.6452	13.4401	50.295	0.675267	0	0	0	0	3.78914	0	11826.4	24.7807	4.64719	0	19469.7	43.8659	0.778379	2121.5	0.613918	0.713024	0	0	1054.86	3.92498	17.6966	0	522.222	1.22423	1.50085	0	2.75166	0	2.81815	11.9393	0	0	1.04602	0	11442	0	14.0352	1.31909
1810034E14Rik	763.769	22.9034	933.586	162.741	269.566	21.7886	327.077	18.4996	164.221	6.67633	75.6299	28.8403	796.676	125.097	923.252	337.233	22.7959	657.024	45.4312	680.564	206.702	442.724	376.686	946.509	1108.4	84.1067	208.916	1720.57	1082.11	513.173	0	0	1127.93	0	832.252	740.221	1052.76	1780.05	1478.97	52.6055	0	1275.25	492.972	1881.79	1.34094	565.696	5.28198	650.883	163.787
1810035L17Rik	2724.25	2363.97	2388.86	2778.55	1855.3	2017	2632.11	2778.01	2272.84	4001.35	2861.78	2706.18	2720.31	3873.03	2354.63	2372	2292.25	2956.61	2377.08	2988.89	1540.07	2667.7	1421.56	1330.64	2027.54	2583.98	3853.9	8285.19	4282.89	3164.57	2323.59	2780.89	8985.77	235.842	4190.53	3252.95	3366.38	4088.7	2186.7	2445.84	1452.62	810.359	1919.24	8690.35	2443.2	2743.09	1827.56	1850.02	2557.94
1810037I17Rik	5838.33	8710.52	9517.33	14190.8	3440.47	5543.65	15062.9	17088.3	19775	7567.4	9840.66	18866.4	7448.97	12107	9012.01	12426.5	9265.26	11205.2	11164.9	7230.11	7685.81	7416.3	4695.7	5523.38	6401.11	6682.49	11349.9	9267.9	6076.92	8505.37	11009.6	13386.2	4813	4396.77	8818.45	16969.3	19665.8	35655.5	10516.1	9522.54	4702.1	9702.98	6298.55	6647.47	7613.89	10422.7	3950.92	5189.52	12447.8
1810041L15Rik	178.392	0.200907	5758.37	26.9671	10.6984	0	3932.21	1375.47	19.9501	11031.1	14517.6	0	10.4701	2.49197	8.14916	0	0	0	1.03253	23.6509	0	2.94953	0	0	0	0	0	1442.63	0	0	0	0	0	0	24.9297	263.85	73.4483	28.3421	1297.5	0	0	0	0	0	0	0	0	603.076	0.439697
1810043G02Rik	3784.94	762.642	3631.57	2623.32	3285.75	4725.02	3341.38	1660.56	2877.43	4394.36	3550.55	13434.8	3420.85	3202.69	2817.21	1433.24	0	857.118	1507.9	4291.26	1927.28	2572.43	588.365	1165.62	1899.93	1826.4	1920.17	2911.73	2468.93	0	637.809	8297.16	2434.75	656.989	2178.12	2810.5	24.4828	632.883	4250.91	1493.93	1462.57	0	0	1391.21	508.218	0	301.073	3564.07	1735.7
1810043H04Rik	3645.32	3526.42	2687.98	3649.47	2027.24	4335.94	3752.73	2861.32	3340.07	3152.12	1738.14	4508.7	2869.75	3447.9	3366.08	3025.63	4655.42	1245.36	3066.19	2739.93	1905.44	3363.05	3408.54	3333.8	3112.79	2804.38	4248.2	10464	3175.15	4048.37	2247.05	5405.04	5091.69	1145.52	6907.98	5368.55	14163.3	9853.43	6972.94	2325.29	3532.05	1949.13	2120.26	8305.42	3332.25	4642.98	3876.97	2900.47	3452.06
1810044D09Rik	54.2077	72.8287	47.3284	387.154	101.356	80.9292	148.05	106.342	31.7101	27.5955	94.5374	14.4201	61.8685	214.808	19.1745	0	101.315	253.85	93.7535	29.8748	142.653	96.3021	88.752	126.487	138.651	11.6644	37.0773	466.538	0	0	100.087	2.52808	325.763	0	400.211	230.831	1395.52	341.482	235.909	45.7167	0	0	52.6475	821.127	0	154.766	0	66.6673	22.6444
1810046J19Rik	6637.25	3946.61	5317	9428.88	3749.26	7887.48	11304.7	12241.3	6241.86	10084.4	6329.95	15261.3	2953.51	4012.58	5953.68	3026.57	12922.7	8069.45	4007.03	5535.63	10968.3	7271.48	9145.54	8526.36	7590.28	3599.4	4985.47	19023.8	3041.31	6547.71	2331.44	14018.2	15702.5	8675.62	7410.47	23061.5	40519	18203.4	15660.8	1381.52	7529.73	5655.45	9490.9	20778.2	4446.57	7204.62	6718.68	4530.31	5716.28
1810048J11Rik	2195.05	1691.74	1765.75	1573	1333.22	410.871	3715.83	2798.35	1144.72	2102.15	3285.17	1591.02	3167.67	1858.02	1293.32	1154.74	985.289	713.767	1596.08	1980.2	275.117	711.721	1184.13	412.541	547.874	2265.97	946.183	807.343	3115.35	0	1128.43	589.043	58.3736	0	897.136	614.149	801.811	692.044	685.045	1649.25	748.197	1138.77	938.082	1732.21	2806.6	773.83	0	1996.51	2274.55
1810049H13Rik	835.455	436.47	397.558	742.886	2189.14	1385.13	2390.67	722.344	850.504	1964.18	669.189	1331.46	2348.15	0.498395	118.403	200.824	91.1835	5.97295	484.255	583.139	0	724.404	1039.27	223.006	756.255	976.129	515.517	6162.61	310.395	1967.16	164.849	2558.42	3875.26	336.917	3070.92	2121.31	1634.23	2520.52	1991.62	168.15	196.999	0	0	3354.59	1110.3	619.064	5.28198	1167.99	603.264
1810055G02Rik	11198.9	639.587	18089.7	6073.23	563.536	3430.15	5019.13	4320.59	935.344	5086.92	10732	7123.55	6658.96	23603.5	19591.1	3265.29	962.493	5602.62	1018.07	10730.2	736.557	1456.92	3276.43	1215.05	1014.17	7266.94	994.669	2556.03	1520.65	1064.36	2788.7	7644.92	877.487	0	1530.06	10762.6	306.035	1195.32	571.627	24711.1	1118.32	1646.31	1392.76	5935.13	907.82	0	10.564	12451	1207.63
1810058I24Rik	7851.04	4076	8710.85	6408.33	3544.19	4781.05	5996.72	5977.22	5487.75	2445.32	3981.37	5051.86	5357.82	4538.38	7438.75	2468.62	10610.2	12495.4	5752	9869.21	10659.7	8942.97	5234.84	5479.79	6727.95	6474.99	6214.01	18567.2	6125.33	4571.04	4303.74	8056.99	18585.4	5643.37	4346.34	4701.27	4994.49	6959.78	4182.86	5378.92	7452.12	5527.5	10653.9	15887	5225.66	7823.69	4558.35	7717.62	6934.68
1810062G17Rik	455.213	140.434	405.942	140.464	0.257793	0	58.309	27.9332	256.201	2.22544	0	0	123.737	227.766	689.323	18.9457	0	0	231.906	550.774	0	11.5032	1.02014	0.778379	2.15381	42.9742	46.3466	46.3229	378.739	0	0	0	0	0	235.608	1180.87	122.414	14.5838	313.034	126.191	0	0	9.57227	457.112	0	0	0	478.513	87.9394
1810062O18Rik	156.972	21.9993	69.7755	317.509	83.2672	351.731	544.369	402.337	214.201	354.736	128.976	278.79	7.61459	0.99679	175.447	1.89457	0	0	104.285	168.129	203.79	2.21215	72.4298	110.53	58.9604	1.22784	463.466	173.711	256.29	0	0	0	0	0	131.994	280.96	24.4828	61.9124	0	215.119	57.7067	85.301	0	46.025	91.1843	0	0	173.247	23.0841
1810063B05Rik	2287.5	2030.67	1833.37	748.983	1491.51	1020.95	2207.54	2060.81	2333.11	3315.47	2660.55	1408.37	2300.56	699.746	1220.94	554.161	1914.85	731.686	2393.4	2057.29	2158.72	1663.83	1335.62	1921.43	1545.89	1494.28	3018.95	4734.87	3946.86	912.308	1648.49	3819.93	14761	0	3706.85	2854.62	2515.6	2565.93	2418.07	417.087	883.509	494.746	3412.51	7800.19	1602.43	1056.68	3227.29	1812.74	2380.08
1810063B07Rik	4155.26	4340.19	2179.27	1105.42	8960.08	4504.02	1680.03	2682.08	6116.28	4090.37	2708.5	1422.79	2414.78	1578.91	2579.93	2699.76	6071.3	3831.65	3787.72	3320.41	2343.59	2337.65	2746.21	3401.13	3269.21	3079.41	3740.53	4389.1	7936.44	1368.46	8315.07	1018.82	6099.1	1970.97	4916.16	5446.9	9517.68	7311.17	8234.15	1194.9	2099.33	3667.94	2474.43	7713.37	4033.56	1883.88	2239.56	3729.86	12992.4
1810064F22Rik	0	0	0	112.089	0	0	0	0	0	0	0	0	0	0	0	0	0	0	3.9236	0.165971	0	0	0	0.389189	0	0	0	0	0	0	0	0	0	0	126.207	8.40478	250.948	15.4093	0	0	0	0	0	220.711	321.827	0	0	0.438601	123.335
1810065E05Rik	31.0791	1.30589	3.24537	24.8567	5.92925	0	10.9329	15.4368	7.14003	8.0116	1.35053	9.61343	3.80729	2.99037	5.27299	9.47284	0	0	10.3253	10.0412	0	28.6104	9.43628	5.05946	2.69226	0.613918	0	0	0	0	1.96249	10.1123	5.64906	0	17159.2	702.4	3292.93	709691	6755.18	0	0	0	0	0	0	0	0	4.38601	2.85803
1810074P20Rik	6885.75	6738.72	8009.85	3950.8	10753.8	4423.09	12137.8	7935	6281.34	7046.2	6727.01	11930.3	9802.83	3640.77	7956.94	6752.24	6137.16	1675.41	7124.65	6469.63	4203.91	3236.96	4306.26	3376.22	3834.85	5453.43	11313.6	7108.92	3676.34	2337.79	4376.35	12314.3	6842.9	2021.5	4168.16	6075.16	5086.3	2555.2	5344.26	2026.25	5535.86	4985.84	4484.61	5116.09	11289.4	4130.65	6032.02	9218.95	5904.69
2010001M06Rik	231.812	0.100453	62.203	10.0834	90.7862	31.1266	69.2419	108.793	4.20002	1207.53	10.129	350.89	14.2774	2.49197	349.455	0	0	0	16.1074	720.646	0	26.9882	0	0.778379	57.0759	1461.12	0	0	0	0	11.7749	0	195.834	67.3835	4320.63	3993.77	11060.1	39497.9	4164.71	0	0	0	167.515	1.04602	26.8189	1152.74	0	160.966	4.17712
2010001M09Rik	3.08819	3.71678	2.43403	7.03491	2.10531	0	28.2434	34.4265	3.99002	0.890178	46.5934	0	0.951824	1.49518	5.27299	0	62225.1	11.9459	17.553	16.929	0	426.207	26692.2	191.87	266.803	3.68351	2.13907	357.348	0	0	0	0	0	0	3.56139	1.80102	0	17.3355	0	5.63631	28930.9	0	0	2.09204	2.68189	613.727	21059.2	2.6316	1.53894
2010002M12Rik	110.387	21.2961	45.1648	0.234497	15.0379	174.309	0	5.26811	281.191	0.445089	51.9955	9.61343	0.951824	0	98.2693	1126.32	291.281	0	58.2346	137.756	0	404.97	66.564	30.3568	11.5767	288.541	30.6601	1138.22	0	0	11.7749	217.415	0	0	63.6598	14.7084	42.8449	9997.9	0	2.50503	0	8.5301	1407.12	12.5523	0	2011.96	0	353.512	464.54
2010002N04Rik	4737.68	153.895	19940.4	5769.09	4978.93	9689.71	12270.9	908.688	361.412	171.804	1266.13	2066.89	8448.39	15045	14173.8	2104.87	1276.57	12668.6	366.96	1987.09	5564.94	6202.86	1061.96	715.33	4768.8	1375.79	1505.19	1651.08	0	2746.43	5.88747	677.526	378.487	0	1256.17	2603.38	18.3621	284.247	226.836	20973	3032.59	1565.27	38.2891	229.079	4.02283	3154.02	205.997	3756.18	848.615
2010003K11Rik	0	0	0.270448	107.634	0	0	0	0	0	0	0	0	0	0	0	0	0	0	0	0	0	0	0	0	0	0	0	0	0	0	0	0	0	0	134.999	434.347	275.431	14420.4	390.158	0	0	0	0	3706.06	0	0	0	0	0
2010003O02Rik	1268.79	749.784	1078	630.562	666.568	1027.18	651.876	660.106	931.144	288.863	404.485	855.595	835.701	674.827	776.567	379.861	1046.08	447.971	1141.77	1003.29	713.267	728.681	901.292	477.925	667.141	935.61	1147.26	1482.33	492.646	370.625	814.433	447.47	777.687	0	942.544	989.663	3470.43	627.104	666.898	399.865	616.864	452.095	679.631	1638.07	335.236	597.717	649.683	753.954	629.866
2010009K17Rik	9.72453	2.10952	6.49075	38.223	38.4542	0	0	1.10263	0.420002	7.12142	39.1655	0	0	0	7.6698	42.6278	0	0	6.19517	11.7009	0	80.9646	0	0	4.57684	0.613918	27.808	0	0	0	0	0	0	0	266.325	49.8283	0	22.2885	0	23.4846	0	0	0	0	0	0	0	0.438601	28.8002
2010011I20Rik	1864.61	3503.21	2440.25	2695.31	2168.08	2427.88	4712.55	974.6	4829.18	2188.06	669.865	1547.76	3743.52	1822.63	1161.97	4321.51	1998.44	146.337	3736.1	877.405	3892.4	1135.57	1356.02	2065.04	2129.84	5321.44	3881.71	1747.04	7953.53	85.5289	2494.32	7675.25	924.563	0	3359.73	3951.45	4908.8	3613.21	5462.21	1877.52	1727.22	1872.36	2469.64	17576.3	5220.3	3687.7	5519.67	7103.14	4101.93
2010012O05Rik	2394.4	983.439	2697.18	1897.31	2331.74	2069.92	2884.93	2349.58	1523.35	2602.88	3219.67	1182.45	1027.02	2900.66	2432.76	1269.36	4640.23	3464.31	1562.83	2569.15	4346.56	1530.22	1095.37	887.741	1540.78	2193.53	2550.49	2613.94	304.7	826.779	934.145	5053.63	2084.5	7243.72	2322.92	1800.72	2901.21	1826.83	998.078	1673.67	1504.35	452.095	2359.56	4048.11	1092.87	757.819	1288.8	2127.21	1481.12
2010015L04Rik	453.045	410.654	1609.98	27.2016	4775.19	1111.22	662.354	108.303	155.821	712.142	360.592	668.134	104.701	150.017	817.313	8.52556	281.149	104.527	99.5357	726.787	0	134.351	369.29	315.633	480.299	57.7083	51.3378	387.127	0	475.161	547.535	0	0	0	201.886	226.329	550.862	845.036	272.203	232.341	0	0	9.57227	57.5312	91.1843	5.33676	0	799.13	111.023
2010016I18Rik	6.17639	29.5333	0.540895	1373.92	81.7635	619.42	0	5.02308	6.09003	1.33527	0	0	0.951824	5.98074	0	113.674	1618.51	0	21.0636	1.1618	1772.98	280.795	586.324	4353.86	769.986	0	931.923	4.96317	0	0	5.88747	207.303	13.1811	3857.7	1139.87	1528.17	2393.19	3076.64	2340.95	73.8982	839.732	3808.69	4331.45	26.1506	1912.19	5.33676	776.451	0.438601	75.8477
2010106C02Rik	0	0	29.2084	0	4.38249	0	0	0	0	0	0	0	0	0	0	0	0	0	37.997	3.07046	0	0.589906	12.2417	0	0	0	0	0	0	0	0	0	0	0	38.8414	29.4167	0	53.1071	136.102	0	0	0	0	0	0	0	0	0	0
2010106G01Rik	13300.2	23134.6	19758.6	12257.6	36605.4	24403.3	10529.8	7567.46	13432.3	3191.29	16273.3	12372.5	6505.71	13116.8	19896.9	38009.8	14168.9	17348.4	24011.6	15782.2	10016.3	16860.1	10707.4	10650.2	17131.6	10305.8	13072.6	9062.75	3790.24	22836.2	30567.7	11753	15661.1	16003.6	11707	22124.4	3348.02	71034.8	9577.01	10337	9338.53	5557.36	6183.68	17736.4	18269	33226.6	7664.15	14536.1	16812.7
2010107E04Rik	5327.13	4915.59	4677.93	6281.47	2598.34	4918	14258.8	7676	4698.35	17720.8	5212.38	13391.5	7760.22	4730.76	4815.2	2718.71	9427.36	12235.6	4240.38	4902.45	4521.24	7607.87	4244.8	4589.71	5669.89	6377.38	5993.68	66559.4	7665.91	3677.74	3830.78	43040.6	32903.9	2813.26	24411.8	21145.5	33186.4	47068.3	12535	3820.48	4314.07	4525.22	6968.61	31967.5	6055.71	12984.3	5350.64	3146.52	4788.08
2010107G23Rik	34.89	144.753	25.6925	1659.77	27.412	0	300.2	547.883	83.7904	3597.21	2938.76	4604.83	7.61459	111.142	19.6539	0	0	8.95942	300.053	31.7834	0	10.0284	40.5505	175.135	0	0	0	236.578	0	0	0	1653.36	124.279	0	2339.5	2732.15	1879.05	1626.51	4123.88	0.626256	0	400.914	363.746	342.049	0	0	0	327.196	29.6795
2010107H07Rik	1007.87	521.655	1016.07	1120.19	548.971	326.829	2550.56	831.871	470.822	1387.79	625.972	1821.75	791.917	1005.76	910.309	1055.27	1304.43	1340.93	906.559	1287.1	2164.55	1895.66	1192.54	1975.91	1184.59	1257.92	520.508	4349.39	1181.78	465.657	278.674	6107.84	5195.25	1044.44	1722.93	1457.63	1493.45	924.009	1723.95	226.392	459.664	1416	1191.75	2457.11	970.844	1536.99	876.808	4445.22	916.548
2010109A12Rik	30.422	3.91768	22.7176	42.9129	378.14	177.422	1.36662	37.3668	15.7501	131.746	6.75267	134.588	0	0	40.7458	49.2588	0	0	85.9063	51.119	0	159.717	47.6915	13.2324	0	1.22784	0.713024	6.61756	0	0	0	0	0	0	161.042	54.3309	397.845	240.22	49.9039	229.21	0	0	0	7.32216	160.913	0	0	29.8248	12.5314
2010109I03Rik	0.0657063	39.0764	0.270448	68.0041	177.534	0	0	0	0	0	0	0	0	0	0	0	0	0	0.206506	8.46452	0	85.3889	411.371	0	9.15367	0	0	0	0	0	0	0	0	0	2.67104	1105.83	0	29466.5	0	0	0	0	0	0	0	0	0	1.7544	0
2010109K11Rik	3566.54	2523.99	943.592	6365.42	1706.12	597.631	315.689	842.408	1249.09	462.892	1347.83	365.31	1320.18	1410.46	4147.92	561.74	2418.9	2475.79	2368.41	3233.94	4736.67	2684.51	1734.75	2121.47	2355.46	2055.4	3155.13	708.079	1426.68	1254.42	1224.59	15.1685	766.389	4278.85	2479.06	4544.29	3029.74	21039.2	848.367	2438.64	4274.27	2170.91	3536.95	577.404	3532.05	4402.82	3707.95	2153.97	3247.6
2010110P09Rik	0.197119	106.28	831.627	0.234497	0.38669	971.15	677.387	26.9531	179.761	0.890178	0.675267	14.4201	0.951824	6.47913	162.504	1827.31	10.1315	3541.96	4207.34	8.13257	0	2300.34	0	0	5342.25	0	2084.88	0	0	0	0	0	0	0	1678.53	898.411	6.12069	16731.8	1256.67	0	0	0	14.3584	16.7364	611.471	6596.23	0	0.877201	248.209
2010111I01Rik	3784.88	6343.63	3765.71	2969.9	528.949	1394.47	183.127	4201.26	5663.52	1917.44	1652.38	1764.06	32223	7143.49	3195.91	7219.25	220.36	6847.98	4810.34	1392.08	288.218	765.845	1111.19	2238.23	3607.62	7173.63	7366.97	4337.81	26662.7	19.0064	13768.8	4633.97	615.748	10478.1	7227.06	5083.39	7871.21	2978.4	10665.8	15577.5	236.796	925.515	8844.77	3389.11	8677.25	1483.62	1600.44	13793.6	8865.39
2010204K13Rik	200.01	19.7893	300.197	385.044	82.4079	0	888.757	379.794	24.7801	2096.81	557.77	28.8403	414.043	651.9	99.7074	11.3674	587.627	68.6889	42.1271	244.724	192.145	17.1073	277.988	100.411	66.4988	340.724	9.98234	997.598	51.258	0	11.7749	0	581.853	0	272.891	200.214	0	10.1812	3529.57	516.035	242.766	0	86.1504	61.7153	0	0	105.64	683.34	167.964
2010300C02Rik	25.494	109.293	0.270448	291.245	135.384	0	219.57	99.359	37.5902	3878.5	242.421	0	47.5912	0	0	0	0	0	2.06506	7.9666	1144.14	0.737382	0	443.287	25.3072	1.22784	0	61.2125	0	0	0	0	0	0	2171.33	2191.55	1775	1427.01	3398	0	0	0	0	0	0	0	0	41.6671	107.946
2010305A19Rik	1443.3	1400.12	694.51	1257.61	905.327	1142.35	1688.68	1016.26	2110.3	1518.2	1119.59	2922.48	1294.48	438.587	569.483	571.212	5638.18	1000.47	1202.69	851.348	574.98	670.428	4234.08	2361.99	1520.59	1677.22	1726.23	3322.02	2710.98	0	2109.68	1817.69	7989.66	0	2701.2	2109.3	838.535	2797.89	3003.31	778.437	4909.05	571.516	1651.22	7756.26	744.224	1691.75	369.738	1288.61	1828.04
2010308F09Rik	0	0	99.7952	10.7869	0	0	55.1202	17.642	0	138.868	0	0	2.85547	0	0	0	0	0	0	0	0	0	0	0	0	0	0	0	0	0	0	0	0	0	54.4225	107.761	0	44.3018	263.13	0	0	0	0	27.1966	0	0	0	0	0
2010310C07Rik	4.33661	23.1043	99.2543	91.6883	9.23759	0	0	23.1552	0.630003	0	0	0	16.181	58.3122	207.564	289.869	0	0	59.6801	140.743	0	103.086	0	0	22.3457	0	7.84327	0	0	0	0	0	0	0	43.4044	40.2229	0	39.8991	0	0	0	0	0	0	0	0	0	134.65	56.2812
2010315B03Rik	1673.34	1666.22	953.869	718.029	3683.69	1578.12	2817.97	450.975	774.694	1290.31	1953.55	1547.76	326.476	129.084	1015.77	566.476	2621.53	223.986	757.049	991.344	723.456	823.804	1489.66	431.611	2006	1721.43	1189.32	908.26	8.54299	902.805	871.345	4666.84	700.484	353.763	1928.27	2490.22	911.983	2607.75	1710.34	105.211	298.483	8.5301	1225.25	3199.78	1287.31	0	1991.31	1391.24	1784.29
2010317E24Rik	0.0657063	49.2222	9.73612	214.33	0.300759	2639.54	16.3994	153.143	0.630003	2041.18	18794	0	0	0	0	0	0	0	26.2262	35.2688	0	131.696	87.4769	48.6487	0.269226	76.1258	0	0	0	0	0	0	0	0	2430.54	28.2161	0	89.1539	36.2938	0	0	0	0	0	0	0	0	0.438601	0
2010320M18Rik	739.261	532.403	1130.74	729.051	817.033	1472.29	1075.98	1076.9	633.783	436.187	1116.22	2561.98	811.906	349.375	720.482	521.954	70.9205	1045.27	456.171	625.046	0	337.426	81.101	119.092	288.072	978.585	130.483	901.643	1067.87	864.792	573.047	477.807	1088.39	353.763	2126.59	2387.86	2601.29	1309.79	2041.52	253.947	196.999	358.264	38.2891	1718.61	860.887	122.745	924.346	1006.59	794.752
2010321M09Rik	3305.88	4212.01	2278.52	2739.86	5177.99	3131.34	4130.83	2625.48	2463.73	2639.82	9538.14	2138.99	4151.85	2167.02	1659.55	1915.41	899.171	3960.06	2557.57	3208.96	2382.89	2585.85	2612.83	3657.6	3519.32	2229.75	3381.88	2865.4	3869.98	3022.02	3355.86	3716.28	1303.05	0	2805.26	2125.81	140.776	1435.27	1846.44	2816.9	1546.14	2938.62	3694.89	2001.04	2255.47	4082.62	4906.96	4299.6	2499.02
2200002D01Rik	336.679	276.046	207.974	9707.47	81.2049	0	3.18877	4.65554	175.771	3.11562	1.35053	0	1178.36	8.47271	189.348	1968.46	182.367	32.8512	1277.65	175.597	196.512	136.711	78.5506	48.2595	21.8073	777.22	1088.79	385.473	1295.69	0	170.737	27.8089	372.838	0	14323.7	7889.09	39576.4	228401	2626.76	2.1919	5.96966	0	502.544	2528.24	1092.87	69.3778	0	382.021	225.565
2200002K05Rik	34.2987	53.4412	592.821	69.6456	0	0	20.4993	39.8171	0	1255.15	4678.25	0	0	0	0	0	0	0	3.9236	206.551	0	3.53944	0	2.72433	0.538451	0	1634.25	0	0	0	0	0	1094.03	0	1248.38	178.301	0	5730.89	154.248	0	0	0	0	7.32216	918.547	0	0	55.7023	651.631
2210009G21Rik	188.314	350.783	329.405	259.354	596.534	214.774	51.4759	775.147	274.891	579.061	567.224	0	534.925	47.8459	558.937	123.147	45.5918	409.147	106.557	144.229	16.0121	515.135	466.458	298.897	560.259	124.011	280.932	59.5581	0	855.289	404.273	20.2246	1.88302	0	606.438	418.738	73.4483	989.498	444.598	106.777	11.9393	409.445	71.792	177.824	198.46	0	0	356.144	224.905
2210010C17Rik	77.4677	3.61632	55.9827	0.234497	0	0	0	2.81783	0.210001	0	0	0	0	0	7.19044	15.1566	0	0	75.168	20.1655	0	63.2674	0	1928.82	91.806	0	1136.56	4802.7	0	0	0	0	0	0	1000.86	2087.69	8844.4	1709.88	1184.08	0	0	3557.05	871.076	17.7824	3916.9	5.33676	0	70.1761	24.1833
2210012G02Rik	2875.57	1391.78	2567.63	1216.1	2929.56	2823.18	941.599	2508.23	1342.96	1320.58	2083.87	259.563	1698.05	1755.85	1424.19	2917.64	6803.3	2353.34	1162.42	2162.68	2880.72	2110.98	1376.17	1642.38	2743.14	2292.98	1905.2	2226.81	1346.95	3012.52	1263.84	1655.89	3127.7	8877.77	2745.94	3200.72	679.397	2083.28	1052.52	724.892	3965.84	1646.31	2598.87	2480.12	716.065	2801.8	6190.48	2603.53	2337.65
2210013O21Rik	5659.54	7824.92	9778.58	3931.11	2534.37	1593.68	3509.47	3618.58	10414.8	7621.7	4579.66	2225.51	11115.4	2747.15	5549.58	8910.16	1676.76	4282.6	8700.28	5977.94	1.45565	3316.16	943.628	2934.49	4514.11	8680.18	7399.05	6417.38	6253.47	921.811	8248.34	5726.1	465.106	1094.98	2565.42	3662.68	2974.66	635.91	3184.78	1955.17	1864.52	1049.2	3063.12	378.66	6270.26	2983.25	427.84	4156.62	7879.15
2210015D19Rik	3863.72	1642.71	1815.52	999.191	1509.38	1739.98	3243.44	4622.58	1938.94	1701.57	2324.94	1115.16	2183.48	1866.49	1948.13	748.355	787.724	397.201	2076	2104.59	729.279	1629.91	668.956	1376.95	1604.05	881.586	1207.86	5628.24	1796.88	1263.93	2229.39	3514.03	2600.45	269.534	1556.22	1563.29	1065	1207.98	381.084	1277.25	352.21	0	1751.72	4470.7	1434.81	539.012	1674.39	3082.92	880.713
2210016F16Rik	9301.25	2628.56	7542.52	8755.64	10712.7	11395.5	5609.96	2676.08	1219.06	3432.97	4685.68	6325.64	6825.53	3960.74	5208.75	1293.04	7649.28	9111.73	4381.43	8597.13	7387.4	8526.94	4642.14	5357.97	10543.7	14006.5	5560.16	7901.37	17968.8	20488.9	1801.57	7943.23	28962.7	623.297	11514.4	11025.6	12859.6	24025.6	10071.5	3643.25	3804.66	6282.42	13181	15109.8	4244.09	7108.56	4563.63	7572.88	7940.27
2210016L21Rik	4967.06	3524.91	3818.99	2143.07	1689.71	1556.33	5131.65	7610.34	4505.78	12912.5	5593.91	7628.26	5045.62	2582.68	2819.13	2031.93	4896.05	1290.16	3748.69	3819.57	1617.22	2042.55	1809.98	2370.94	2629.26	4567.55	4122.71	2987.83	3519.71	874.295	2146.96	6590.71	6323.18	235.842	3846.08	4712.38	41418.7	3928.55	2858.13	2959.06	2031.67	2115.46	3168.42	2126.56	4284.32	1563.67	4125.22	2921.52	3555.83
2210018M11Rik	1912.38	2657.39	1948.85	1114.33	1662.85	1739.98	2107.78	3205.09	3004.9	3640.38	2376.94	2802.32	2975.4	2211.88	2185.89	4008.91	1502	1042.28	2171.61	2120.44	387.202	1976.77	2221.86	2880.39	2248.03	6079.63	4077.79	1841.34	4154.74	522.677	1976.23	151.685	689.185	218.996	1528.06	1536.57	3696.9	2453.11	2141.33	1820.84	2807.73	1079.06	770.567	1348.32	2067.74	1937.24	1309.93	3264.5	986.46
2210020M01Rik	1005.7	71.0206	25.4221	646.039	68.2723	1011.61	802.66	83.0646	55.8603	142.874	2.70107	0	21537.9	2.99037	73.8218	5.68371	0	23.8918	272.174	471.855	0	1095.6	0	1.94595	340.84	81.651	936.914	12178	17273.9	0	3.92498	6686.77	320.113	0	459.976	7346.38	79.569	590.507	1410.92	0.939384	204.958	0	0	12.5523	0	1211.44	4769.63	1190.36	0.879394
2210021J22Rik	1915.73	1526.59	2138.97	1598.33	1729.97	1911.17	2592.47	1441.5	2470.87	1461.23	1802.29	3773.27	3951.02	911.564	1202.24	2273.48	1681.83	286.701	1533.92	1847.01	563.335	1370.65	1330.26	1955.29	2084.88	1854.03	1321.23	4537.99	2107.27	570.193	2798.51	1534.54	10744.5	16.8459	4289.81	6384.63	4033.54	2434.67	1864.59	190.069	1550.12	848.744	4384.1	2424.68	1921.57	1344.86	501.788	3092.57	2426.25
2210039B01Rik	3.21961	0.100453	0.811343	251.146	0	0	0.455539	14.0891	4.20002	0	1.35053	38.4537	0	0	33.5554	0	0	0	0.619517	8.29855	0	0	0	0.778379	0.269226	0	0	0	0	0	0	0	0	0	1910.91	823.368	220.345	588.306	385.621	13.7776	0	0	0	54.3932	0	0	0	0	0
2210403K04Rik	3717.4	761.839	10756	16821.2	749.491	1895.61	1553.39	523.136	1178.95	3025.71	231.617	28.8403	7484.19	39573.5	13741.9	13162.5	5116.41	14974.2	3385.04	7179.98	5241.78	14589.8	2356.01	937.946	2444.57	3550.9	3202.19	899.988	2483.16	1872.13	2529.65	169.381	2719.08	8439.78	1656.71	5682.53	165.259	11105.2	2908.04	32795.8	427.825	2239.15	1330.54	5921.53	1634.61	1243.46	8567.37	5120.66	1421.32
2210404J11Rik	594.904	412.462	684.503	596.091	743.648	333.055	1303.75	691.225	308.911	854.126	1055.44	615.26	693.879	193.876	349.455	90.9393	98.7821	283.715	258.132	1015.16	553.146	1002.99	1045.13	505.168	564.297	438.951	496.265	461.575	256.29	3715.76	0	111.236	875.604	202.15	784.73	560.719	673.276	373.951	562.553	247.058	0	447.83	224.948	1041.84	725.451	1206.11	1230.7	1134.66	375.721
2210404O07Rik	695.172	381.12	431.094	427.957	373.457	46.6899	225.036	36.0192	442.472	68.0986	49.9697	4.80672	1.90365	30.4021	436.699	185.668	985.289	501.728	225.917	386.961	36.3912	814.808	74.7251	190.703	1466.74	5.52526	1287.01	239.887	313.243	836.283	123.637	280.617	27590	0	19874.1	13347.7	10607.2	97665.1	15075.5	14.0908	5.96966	0	33.5029	201.882	187.732	208.134	1183.16	147.37	298.115
2210404O09Rik	827.439	648.226	692.617	442.261	526.414	703.461	368.987	135.256	65.5203	1148.77	509.826	365.31	183.702	7.47592	332.678	6.63099	174.768	14.9324	463.605	936.823	0	1030.42	126.497	601.298	678.18	1473.4	627.462	119.116	130.993	0	64.7622	0	141.227	0	878.773	670.582	0	1857.1	2513.34	73.5851	0	665.347	2383.49	320.083	1033.87	80.0513	654.965	456.583	615.136
2210407C18Rik	0.0657063	12.0544	0	1309.2	0	0	0	0.245028	0	0	0.675267	0	256.992	0	0	0	0	0	0.619517	0.248956	0	0.147476	0	0	0	0	0	277.938	1529.2	0	0	0	0	0	2270.16	3826.88	6.12069	19883	1483.51	0	0	0	0	0	0	0	0	0	0
2210408F21Rik	675.855	465.702	692.076	1959.22	290.748	871.545	1721.03	160.126	535.292	1078.9	437.573	653.713	713.868	991.806	879.151	495.43	0	134.391	1070.32	1178.48	0	501.125	1.02014	46.3135	200.304	1114.87	968.287	4433.77	1301.38	0	1018.53	4651.67	1641.99	0	7.23407	14.7084	0	103.738	1292.97	497.874	0	0	0	2828.44	927.934	1494.29	42.2558	910.535	304.27
2210408I21Rik	652.463	213.463	756.172	266.857	411.051	3.11266	813.593	984.892	521.432	1485.26	904.182	586.419	1357.3	525.308	952.493	169.564	590.16	0	473.517	778.072	0	339.491	107.625	68.8865	180.381	57.0943	352.234	825.541	358.806	0	1118.62	5.05616	58.3736	0	337.887	372.212	67.3276	188.764	1678.59	269.916	0	0	0	680.96	846.136	795.177	596.864	666.673	354.835
2210411K11Rik	913.383	1752.21	1448.25	4349.21	172.12	1251.29	920.645	1811.86	2786.08	380.551	873.795	192.269	537.78	307.011	879.151	1904.04	957.427	674.943	3426.75	908.027	777.315	1258.12	842.124	555.762	939.329	104.366	977.557	415.252	179.403	247.083	896.858	7283.4	2587.27	892.831	7050.11	9142	14132.7	6183.81	3924.26	270.856	25.8685	174.867	258.451	4017.77	596.721	955.279	491.224	794.306	2450.87
2210415F13Rik	85.1553	17.0771	32.9946	143.747	41.118	6.22532	63.3199	123.617	41.7902	63.6477	42.5418	43.2604	63.7722	43.3604	59.4409	129.778	113.979	14.9324	40.0621	16.929	48.0363	20.4992	28.0538	62.2703	19.9227	14.734	7.13024	24.8159	2.84766	47.5161	13.7374	58.1459	18.8302	0	235784	373320	83523	3.75728e+06	75509.2	0	0	0	2507.93	8.36818	1.34094	5.33676	0	32.4564	16.4886
2210416O15Rik	40.935	39.88	5.94985	9.14538	0	0	838.192	54.3963	21.6301	9.79196	498.347	201.882	39.0248	34.3892	22.0507	25.5767	0	0	67.5273	9.29437	0	0	2.29531	0	0	108.05	4.99117	0	227.813	0	194.286	88.4828	0	0	3.67268	12.6072	18.3621	1.651	36.2938	6.88882	0	0	0	2.09204	171.641	0	0	66.2287	94.0952
2210417K05Rik	22.603	9.14126	97.6316	225.82	34.5443	413.984	291.089	65.6676	101.43	35.6071	70.2278	28.8403	108.508	0	0	0	0	0	28.0847	60.9113	30.5686	51.0269	19.6377	75.5027	128.69	77.9675	0	36.3966	0	0	0	0	0	0	215.353	149.185	97.9311	73.7446	136.102	0	0	0	172.301	0	2.68189	0	26.4099	32.0178	44.1895
2300005B03Rik	2.62825	1.30589	2.43403	0.937987	0	0	0	0	0	0	0	0	0	0	0	0	0	0	0	8.21556	0	0	0	10.1189	6.19219	0	0	0	0	0	0	0	0	0	0.222587	0	0	1.651	0	0	0	0	0	0	0	0	0	0	0
2300009A05Rik	728.354	1138.24	1240.27	591.636	796.71	952.474	2287.72	975.213	1822.81	1830.65	1233.04	2792.7	1918.88	763.043	731.507	1110.22	1198.05	391.228	1874.04	1110.76	962.182	764.223	1534.54	1143.44	1009.6	882.814	891.994	2144.09	845.756	351.619	1159.83	5612.34	7417.22	202.15	1809.19	1964.62	5673.88	2160.88	2055.13	636.59	1591.91	678.143	2072.4	4123.42	1713.73	1115.38	2265.97	1141.68	1934.23
2310001A20Rik	4225.37	7382.62	2454.85	4944.84	4657.72	10514.6	8550.01	8056.17	4735.52	4774.91	13462.1	7162.01	5468.23	3075.1	3728	4501.5	1258.84	2051.71	5193.61	4088.53	13234.7	3374.26	2269.04	5022.88	3579.63	9083.53	9121.72	7759.09	2289.52	1672.57	13417.5	1385.39	17527.2	6620.43	4904.92	4817.44	1181.29	1259.71	2141.33	5230.49	1806.82	3680.74	6202.83	5122.37	6675.22	1184.76	2096.95	6857.08	6676.36
2310001H17Rik	415.066	793.281	42.1898	84.4189	112.097	361.069	0.911078	12.0064	885.154	113.498	2.0258	0	263.655	665.856	75.7393	1165.16	1978.18	2147.27	694.065	322.647	1378.5	3368.95	1103.02	837.925	1177.59	10.4366	367.921	115.807	62.6486	3088.54	1878.1	2672.18	871.838	320.072	1379.93	916.722	4119.23	1374.18	680.508	182.241	262.665	1424.53	933.296	5442.45	1669.48	1766.47	924.346	732.024	2219.59
2310001K24Rik	5.65074	0.401814	0	14.7733	0	0	5.01093	1.7152	1.47001	7.56651	12.8301	0	3.80729	0	0	0	0	0	0	5.56003	0	0	0	0	0	0	1.42605	109.19	0	0	0	0	0	0	22.8152	17.7101	0	6.05366	0	0	0	0	0	0	0	0	0	10.5264	0.659545
2310002D06Rik	1.83978	1.90861	0	55.3413	0	0	15.4883	0	0	47.1794	12.1548	57.6806	0	0	0	0	0	0	0	0	0	0	0	0	0	0	0	46.3229	0	0	0	0	0	0	0	5.1029	0	3.02683	9.07344	0	0	0	0	0	0	0	0	0	0
2310002J15Rik	0	0	1.89313	184.549	0.300759	0	0.455539	0.245028	0.210001	0	1.35053	115.361	0	0	0	0	0	0	1.65204	0.414927	7.27823	0.737382	0	0.389189	0	0	0	0	0	0	0	0	0	0	28.7137	0.300171	0	22.8388	0	0	0	0	0	0	0	0	0	0	0
2310003C23Rik	1726.1	2485.32	1642.7	3094.42	2763.42	1503.42	1926.47	1387.84	2847.19	2259.72	1405.91	2648.5	2924	975.857	1231	347.653	3796.78	2036.78	2195.98	1650.58	2634.72	2066.29	2394.77	2191.14	2455.61	1621.36	1326.94	5658.02	2112.97	85.5289	2926.07	4944.93	3517.48	4026.16	3772.51	6102.47	9132.07	8429.45	4854.29	885.526	4278.25	2618.74	1076.88	6729.06	3077.47	3634.33	5229.16	1996.51	1768.24
2310003F16Rik	6509.65	5204.89	7258.55	5384.52	3296.7	3414.59	3382.38	3826.36	6004.98	8821.22	4101.57	4657.71	4454.53	5005.88	6520.77	3566.53	16364.9	4891.84	5653.5	6933.1	8222.94	6142.84	6034.88	6498.29	4474.26	3932.76	5806.16	15538	4137.66	7070.39	3516.78	8433.68	9981.89	3335.48	8308.61	9455.08	25015.3	7536.53	4641.06	4579.5	5362.74	4550.81	5982.67	13351.4	2962.15	6580.22	6919.39	4390.39	6582.92
2310003H01Rik	3211.72	2710.23	1137.77	4975.79	2908.85	2779.61	3597.39	3310.21	2326.39	2484.04	4217.04	807.528	2784.08	1106.93	1432.81	949.179	1160.06	931.78	2613.53	2516.12	3327.61	2073.81	2227.98	1531.07	3051.94	2445.23	3503.8	1024.07	11.3907	5758.95	661.359	4871.61	760.74	18244.1	3195.23	2142.92	8715.87	2574.73	1787.47	2078.86	917.337	1044.94	4207.01	950.834	2106.62	1323.52	1906.79	3481.61	2097.13
2310003L22Rik	772.64	839.489	1545.34	1378.84	503.513	1378.91	1220.39	1994.53	1136.95	4782.93	2993.46	3720.4	1136.48	571.16	1389.19	707.621	321.675	567.43	1006.92	978.896	2441.12	600.672	729.144	639.049	853.715	928.243	424.25	3388.19	2941.64	532.18	394.46	834.267	907.616	1010.75	2282.52	1760.8	569.224	920.982	1165.94	693.579	988.973	934.045	1411.91	1619.24	1209.53	458.961	2873.4	734.217	593.811
2310004I24Rik	2321.34	2812.29	1979.14	3326.81	1968.6	1332.22	1982.96	1417.37	2168.05	1973.97	2306.04	437.411	2082.59	1115.91	1491.3	752.144	3242.08	824.267	3248.13	2038.37	2786.11	1361.8	1653.39	2139.76	2048.27	2493.12	4943.4	1201.09	899.862	3772.77	3296.98	280.617	1660.82	774.91	1708.47	1566.29	544.742	10442	2222.99	811.941	1114.34	5096.73	2498.36	5913.16	2526.34	2572.32	2810.01	2635.11	2241.14
2310004N24Rik	3147	1077.46	3719.47	6453.82	4521.44	2901	5831.81	7348.89	341.882	5176.38	7238.86	7407.15	1519.11	2178.48	3930.29	398.807	5876.27	7373.6	1016.42	3635.01	3439.69	5363.42	3964.26	3839.35	5272.79	3569.32	444.214	3274.04	1147.61	2299.78	1579.8	3187.91	280.57	0	7735	9085.87	60319.4	5045.73	8438.3	1837.12	3018.66	4559.34	6308.12	767.78	1829.05	4530.91	1954.33	1843	4191.85
2310007L24Rik	0	25.6156	3.24537	3.28296	0	0	159.439	0	13.8601	0.445089	0	0	0.951824	0	0	0	0	0	23.1286	0.0829855	0	0.147476	0	35.027	40.9223	0	0	8.27195	0	0	0	0	0	0	4.22915	30.9176	0	0	40.8305	0	0	0	0	0	0	0	0	0	58.04
2310008H04Rik	2865.98	1397.01	1887.73	619.775	1329.27	1366.46	522.503	1105.2	1359.97	379.216	691.473	14.4201	422.61	5988.71	1900.67	581.633	58.2561	878.023	1214.25	2176.29	218.347	1588.91	1148.68	1300.28	2535.03	1408.94	1187.19	211.762	1557.67	104.535	1560.18	2.52808	463.223	8962	964.024	597.64	997.673	608.118	807.536	3490.75	69.646	0	306.312	836.818	785.794	213.47	2287.1	4218.02	1754.17
2310008H09Rik	2224.09	3912.76	928.988	2549.22	3043.77	1596.8	1725.13	2111.9	3767.84	2279.75	1667.91	2446.62	3726.39	1867.49	1506.64	2792.59	2801.36	1460.39	3401.15	2244.84	2775.92	2092.54	1411.36	1463.35	2397.45	1079.88	2153.33	1371.49	5120.1	1482.5	441.56	3766.84	3385.67	505.376	4407	2474.31	12119	1245.13	1941.72	1648.93	3179.84	870.07	1158.24	3913.17	3612.51	3580.96	1441.98	1275.01	1770
2310008N11Rik	0	0	0.270448	18.2908	0	0	0	0	0	0	0	0	0	0	0	0	0	0	0	0	0	0	0	0	0	0	0	0	0	0	0	0	0	0	59.6533	5.70324	0	6.05366	0	0	0	0	0	0	0	0	0	0	0
2310009A05Rik	1396.85	1127.49	1441.49	771.26	1428.3	1070.76	910.623	705.192	1134.22	1351.29	731.989	1845.78	834.749	454.038	1243.47	959.599	1580.51	1857.59	1678.06	1369.01	1320.27	1083.51	735.01	779.546	1169.52	1412.62	1464.55	3128.45	831.518	1320.95	814.433	1916.29	2092.04	1330.82	1912.8	3998.88	5900.35	2997.11	1057.06	294.654	318.382	528.866	1459.77	3388.07	1197.46	1830.51	956.038	823.692	2063.5
2310009B15Rik	1085.07	485.692	779.701	1306.38	400.052	270.802	1357.05	1547.72	613.413	1053.53	1064.9	110.554	296.969	597.575	1249.7	123.147	511.641	1107.98	721.737	1017.65	163.032	1312.25	451.666	696.26	818.715	935.61	909.819	1015.8	213.575	627.212	302.223	1132.58	689.185	0	1112.93	983.359	1101.72	1168.63	249.52	510.712	302.463	302.818	248.879	1691.42	856.864	218.807	0	696.059	710.111
2310010J17Rik	287.859	874.145	252.328	289.369	369.719	295.703	269.679	464.084	373.802	256.371	222.163	173.042	691.976	103.168	266.046	838.347	17.7301	188.148	1197.11	200.991	371.19	681.341	308.337	324.195	305.302	63.2335	301.609	100.918	458.474	456.154	553.422	1602.8	310.698	0	251.078	393.524	569.224	255.905	789.389	178.483	55.7168	8.5301	282.382	867.152	241.37	699.115	295.791	129.826	213.473
2310010M20Rik	0.394238	28.4283	1.08179	11.9593	2.06235	0	2.2777	0.612571	0.420002	12.9076	0	0	0.951824	33.8908	1.43809	1.89457	0	2.98647	3.7171	3.31942	0	1.17981	0	0	0.807677	0.613918	0	3583.41	0	0	0	0	0	0	3.67268	0.600342	0	2.4765	0	1.25251	0	0	0	0	0	0	0	0.438601	1.09924
2310011J03Rik	5409.92	2745.69	2589	3029.93	4223.69	2508.8	4897.5	6163.44	4529.09	3210.87	2254.72	5917.07	4054.77	1983.11	1812.47	2153.18	4979.63	4076.54	3381.53	3259	4899.7	4453.35	4487.84	2980.02	3911.04	4627.1	4037.14	2443.53	871.385	4989.19	2419.75	1446.06	3914.8	13341.9	3517.21	3350.81	9021.9	7236.88	2095.96	1508.96	2962.94	5143.65	5298.25	3394.34	2280.95	6510.84	5281.98	2831.61	4985.06
2310014F07Rik	0.197119	58.3634	7.30209	247.629	77.1232	0	101.585	202.516	29.8201	0	124.924	124.975	0	0	0	0	0	0	2.27156	42.9035	0	12.2405	0	0	0	0	0	1010.83	0	0	0	0	0	0	48.6352	142.581	0	11.557	0	0	0	0	4.78613	87.8659	5956.48	80.0513	0	0	75.8477
2310014L17Rik	15.3096	59.6693	12.711	235.669	39.958	0	25.9657	861.765	41.1602	40.058	0	0	0	86.7207	187.431	7.57828	0	0	44.6052	203.646	0	72.8534	9.94635	2.72433	0.269226	11.0505	5.7042	0	8.54299	0	0	0	0	0	86.475	262.649	67.3276	114.744	0	280.563	0	0	0	32.4267	4.02283	0	0	172.37	0.659545
2310015A10Rik	653.777	335.916	826.488	273.658	778.364	432.66	1921.92	2044.27	408.242	125.07	1991.36	870.016	933.739	845.278	493.743	34.1022	775.06	866.077	301.292	402.977	1002.94	971.723	1517.2	613.752	982.405	760.644	424.25	2354.2	287.614	0	0	0	0	0	261.54	568.523	1450.6	494.199	294.887	861.102	1745.13	499.011	0	225.941	443.853	2865.84	1140.91	332.021	454.427
2310015B20Rik	84.5639	1.90861	0.540895	49.4788	0.429656	0	182.671	36.5092	0	12.4625	0.675267	0	0	2995.85	67.5901	61.5735	0	0	1.03253	106.719	0	2.65458	0	0	0	1.22784	20.6777	137.314	0	0	0	0	0	0	12.7987	8.10461	0	13.208	793.926	1446.65	0	0	0	0	0	0	0	79.3867	24.8429
2310016M24Rik	8803.85	7313.61	6669.78	7903.01	6053.42	8615.85	12966	9175.82	8322.76	19324.9	9173.5	25792.8	7215.78	7925.97	5612.38	4702.32	10445.6	8529.37	6707.71	7276.33	6505.28	9478.46	9089.94	7583.74	8212.46	8724.38	8475.01	47664.6	7002.41	6756.78	7306.35	27856.9	13591.6	8220.79	18597.8	18619.9	39117.3	31336.8	15656.2	4524.39	5585.61	9046.17	9629.7	12349.3	5322.21	13667.4	9312.13	6612.78	8680.28
2310021P13Rik	1779.59	2485.82	2639.03	1539.47	1932.16	2829.41	3181.03	2758.65	2298.25	2926.01	2227.71	3331.05	3395.15	1467.77	2455.77	2705.44	316.609	2374.25	2341.57	3247.97	1262.05	2779.78	1021.67	534.357	1517.89	4042.65	1568.65	2302.91	1423.83	988.334	3893.58	1504.21	2186.19	1381.36	904.816	1318.05	4321.21	2555.75	4309.88	2456.18	2135.15	524.601	550.405	1048.11	4867.63	3623.66	2128.64	3446.96	2046.13
2310022A10Rik	1152.29	639.386	481.127	948.774	1522.48	2023.23	886.024	1312.25	1125.61	2585.52	2158.83	677.747	2473.79	982.336	485.594	245.347	552.167	9894.19	1191.74	819.896	1732.22	3896.92	1533.01	979.2	2296.5	1755.8	1223.55	7269.39	541.056	4190.92	1098.99	399.437	90.385	0	857.293	681.087	183.621	745.426	798.463	803.174	1357.1	1108.91	2043.68	690.375	1225.62	1488.96	771.169	1233.78	959.859
2310022B05Rik	2195.25	861.689	2595.22	833.871	314.293	133.844	13799.6	4641.82	3344.9	788.252	2254.72	4878.82	11623.7	733.637	1198.41	1905.94	805.454	1191.6	999.074	2744.58	26.2016	610.848	335.625	36.5838	490.529	1778.52	1622.84	4321.27	4507.85	123.542	2154.81	30.337	2220.08	168.459	590.634	1698.97	85.6897	1525.8	1356.48	731.78	69.646	0	0	998.951	1751.27	384.246	1405.01	2318	505.871
2310028H24Rik	816.663	2009.97	292.624	72.4595	966.682	0	2920.92	2095.24	1022.49	1593.86	2125.74	1889.04	361.693	212.316	340.347	1211.58	0	713.767	1793.5	556.749	2.91129	1054.6	630.19	504	1335.36	473.33	786.466	617.088	1540.59	152.051	1399.26	10.1123	0	977.061	52.3079	75.3429	104.052	342.032	2395.39	696.084	0	0	550.405	79.4977	3123.06	1536.99	1246.55	972.378	2126.81
2310030G06Rik	135.289	0.703174	217.981	971.286	0.644483	0	28.2434	3.30788	39.2702	340.493	0.675267	0	1728.51	3.48876	261.253	0.947284	0	0	76.82	107.217	0	1.03234	0	47.8703	1.0769	223.466	0	1348.33	1768.4	0	1.96249	10284.2	7855.96	0	1859.49	3925.33	2307.5	3140.75	1733.03	4.38379	0	0	14.3584	6087.85	0	0	0	554.391	82.8829
2310030N02Rik	1431.35	843.407	1354.67	1104.01	926.08	329.942	1966.56	937.479	1144.72	2301.11	1112.16	1903.46	871.87	219.792	1028.23	713.305	775.06	131.405	1234.28	1028.85	669.597	893.118	827.842	658.898	1191.05	685.746	1115.88	4974.75	566.685	380.128	1314.87	826.682	5884.44	2038.35	2927.69	830.272	1438.36	1141.94	517.186	1040.84	230.827	853.01	344.602	7514.62	981.572	5.33676	274.663	691.235	1365.92
2310033E01Rik	0	0	0.270448	282.569	0	0	0	0	0	0	0	0	0	0	0	0	0	0	0.206506	0.497913	2.91129	2.65458	0	0	0	0	0	0	0	0	0	0	0	0	15.4698	0.900512	0	5.22816	249.52	6.88882	0	0	0	0	0	0	0	0	0
2310033P09Rik	2131.77	2325.6	1692.46	1198.51	3049.7	2798.28	2612.52	2208.81	2267.59	3349.74	1785.41	1317.04	3795.87	2931.06	1478.35	1828.26	3561.22	3607.66	2698.61	1653.82	5365.51	2269.52	4266.47	2392.35	2045.31	2087.93	3287.76	2241.7	3872.82	1197.4	1919.31	184.55	5033.31	1600.36	4961.24	1973.02	9113.71	3689.98	5366.94	1995.57	5161.76	2175.17	2790.32	1879.7	2924.6	912.585	2345.2	2404.85	3874.61
2310034G01Rik	156.447	175.09	183.093	419.984	132.248	317.491	445.062	86.7401	275.101	106.376	413.263	115.361	43.7839	0	3.35554	0	0	0	30.1498	58.5047	0	203.518	0	0	0.538451	0	135.475	307.717	0	0	0	0	0	0	824.684	586.834	428.449	400.092	1946.25	108.655	0	0	4.78613	10.4602	1.34094	0	0	163.159	14.0703
2310035C23Rik	1199.99	1743.77	1080.71	2054.43	1820.06	1444.27	1391.67	2282.93	934.714	2604.21	1513.27	1744.84	830.942	1265.42	1406.93	2808.7	2173.21	2478.77	1175.02	1320.46	425.049	1950.67	1862.26	2773.36	1747.54	1542.77	1176.49	678.3	321.786	1777.1	1020.49	1251.4	1532.78	0	2942.38	3367.62	11219.2	9108.28	6936.64	757.457	1627.73	3902.52	368.532	2064.85	1804.91	3917.18	966.602	1307.91	1573.68
2310035K24Rik	3981.86	2141.47	2197.66	1302.63	4058.74	3981.09	5618.62	2351.41	2695.57	5168.82	4994.95	2095.73	3217.16	842.786	1517.66	1118.74	2249.19	537.565	3279.51	2695.37	2133.98	4025.67	1765.6	1336.09	3859.62	4079.48	6313.12	8248.79	1329.86	3269.1	461.185	5829.75	1188.19	0	2716.23	3059.04	1585.26	6165.93	1097.89	914.96	258.685	3979.29	0	4689.32	1898.78	1270.15	2778.32	3845.21	2748.99
2310036O22Rik	5287.58	7048.11	5162.31	7330.61	4725.61	9291.29	6411.71	6201.91	8645.11	8061	6849.91	7176.43	6964.49	6232.93	5290.72	6730.46	10731.8	6928.62	9029.25	6109.14	9557.77	7959.9	7936.17	8699.55	5736.66	7141.09	8147.73	5022.73	4675.87	5122.23	7037.49	11588.7	9347.31	15531.9	7089.06	9890.03	26202.7	12718.2	8710.5	5806.02	7549.63	5203.36	12989.6	9107.72	8694.69	7145.92	9729.4	5413.21	10792.8
2310037I24Rik	2242.16	2568.29	2300.16	3372.06	3462.81	2767.16	3609.69	3290.24	2314.42	3609.23	6251.62	2667.73	2340.53	2257.23	2234.79	2117.18	1724.89	889.969	2433.05	2594.87	1968.03	1599.38	2981.35	2155.33	3664.7	3928.46	3200.05	5153.43	7477.97	2328.29	2900.56	5794.36	3041.08	13510.4	3343.03	2611.79	1854.57	1324.1	3148.48	3576.86	2553.02	2396.96	4192.65	2398.53	2302.4	1094.04	5223.88	2939.94	2853.85
2310039H08Rik	3271.71	1851.36	2774.25	1757.32	1435.78	1960.98	1838.1	868.748	1675.18	1036.61	573.302	1711.19	1593.35	2300.09	2086.66	828.874	1998.44	731.686	2788.65	2613.29	1218.38	1882.68	2266.24	2166.62	801.216	1721.43	1607.87	6291.65	4319.91	1330.45	606.409	2937.63	6767.58	1431.9	5891.43	8187.16	9738.02	5169.28	3225.61	2041.6	1456.6	797.564	2728.1	22614	1968.51	1536.99	1653.26	2104.41	1658.76
2310040G24Rik	113.803	1147.28	149.558	95.4402	2431.03	691.011	206.359	35.2841	446.252	97.0294	167.466	225.916	228.438	295.05	66.152	16.1038	0	343.444	855.552	163.73	2.91129	974.525	0.510069	14.0108	1220.94	458.596	0	2350.89	0	1900.64	600.522	0	1.88302	0	875.434	1497.55	1946.38	49.2548	1864.59	335.986	69.646	0	4.78613	959.202	45.5921	101.398	834.553	16.6668	39.3529
2310042D19Rik	20.5004	194.277	12.1701	472.042	129.455	0	318.422	112.591	119.701	98.8097	230.941	0	607.263	0	28.7617	10.4201	0	0	192.257	45.642	4.36694	110.165	303.746	12.8432	220.765	40.5186	1.42605	14494.1	2.84766	0	0	0	0	0	77.4602	63.336	6.12069	153.543	467.282	25.0503	0	0	0	0	0	0	0	19.737	557.316
2310043J07Rik	0	0	1.35224	8178.31	3.09352	0	0	0	0	0	0	0	0	0	0	0	0	0	2.47807	8.5475	0	1.76972	0	0	0	0	0	0	0	0	0	0	0	0	16.1375	505.788	12.2414	3.57716	4.53672	0	0	0	0	0	0	0	0	0	0
2310044G17Rik	2108.32	2084.31	1903.14	1852.06	1866.98	703.461	7040.81	11221.9	2564.53	6136.44	9245.08	15900.6	2770.76	1243.99	791.427	6153.56	306.478	495.755	1681.16	1662.61	8179.28	654.943	2793.39	938.725	1255.4	2270.88	447.779	3762.08	3821.57	114.039	1456.17	846.907	2257.74	7496.41	4305.94	4773.32	19500.5	21522.7	1252.13	1720.64	2471.44	5399.55	851.932	3834.72	568.561	1147.4	1542.34	2325.46	2432.18
2310044H10Rik	12790.9	9352.51	16611.4	5490.04	10655.4	10159.7	13714.5	40612	10992.5	15796.2	23786.3	6186.24	17523.1	8501.62	14669.4	8349.36	9181.67	6190.96	10544.4	14586.9	6687.24	6724.78	9309.02	10706.2	8210.31	10500.4	11843.3	9749.32	11598.5	6595.23	7577.17	12711.2	7823.95	7159.5	9597.61	9834.5	5202.59	8456.96	10543.3	5215.15	8343.59	5318.51	12391.3	7413.16	10652.5	10764.2	9185.36	13905	12453.8
2310045N01Rik	2828.92	3081.31	3457.4	2181.52	1539.37	3093.99	3607.41	4508.15	2805.19	3091.59	2657.17	3186.85	7400.43	1984.61	2071.8	1151.9	5422.89	1164.72	1396.39	3126.97	2167.46	2632.6	2436.35	4044.85	2218.69	2544.07	3628.58	5222.91	3747.53	1168.89	2400.12	4765.43	3882.79	2745.88	3108.87	2437.39	11923.1	4232.61	1501.65	1471.39	2274.44	3040.98	7552.52	5815.88	3105.63	2294.81	897.936	2968.45	3782.49
2310046A06Rik	7.81904	124.361	32.9946	0	0.257793	0	191.326	705.927	0	906.201	95.8879	0	11.4219	0	0	1028.75	0	0	0	0	0	0	0	0	21.8073	3.68351	39.2163	22410.4	0	0	0	0	0	0	21.3683	8.10461	2019.83	14.859	0	284.32	0	0	0	0	0	0	0	0	0
2310046O06Rik	8056.11	12320.6	4930.26	3664.48	13799.4	5073.64	1871.35	5185.29	18213.6	2898.86	6569.67	6402.55	3247.62	4338.03	4084.65	10990.4	10349.3	3652.46	13138.7	5848.57	4554.72	4744.91	5238.92	3512.82	6851.53	5228.12	10838.7	4731.56	6196.52	9123.08	12275.4	15.1685	1280.45	0	2678.61	4059.81	9364.66	2432.75	4015	3056.44	5412.49	302.818	2555.79	1084.73	7525.38	928.596	2329.35	6342.6	14099.1
2310047B19Rik	1244.87	727.584	655.565	1081.5	1472.73	787.503	900.601	1203.46	1689.04	1347.28	1650.35	557.579	2276.76	464.504	348.017	197.035	0	149.324	1355.5	1096.9	0	447.296	1043.6	433.946	1237.63	377.559	2508.42	3745.54	0	0	851.72	1552.24	1449.93	370.609	1271.86	1775.51	1266.98	627.655	685.045	641.913	1176.02	0	2742.45	1447.69	413.011	0	0	2307.04	1263.91
2310047M10Rik	690.836	508.997	938.724	397.707	1714.24	1584.34	808.126	1279.17	1060.29	702.795	763.727	908.469	1360.16	1002.77	618.857	1243.78	276.083	1323.01	983.586	667.286	1430.9	2785.98	762.298	251.416	2329.88	1098.3	658.122	1480.68	1272.91	1178.4	885.083	2199.43	346.476	0	628.14	1556.09	440.69	1406.93	489.966	890.85	1323.27	1181.42	1043.38	606.693	623.539	1542.32	126.767	771.06	712.309
2310050B05Rik	0.459944	21.5975	20.8245	0.468994	0	0	0	11.0263	5.04002	3.11562	10.8043	4.80672	796.676	0	5.75235	1.89457	0	17.9188	28.0847	133.026	0	35.5418	31.1142	0	0.538451	76.7397	0	3077.17	797.346	0	0	0	0	0	5.56467	3.00171	171.379	9.90599	0	5.32318	218.887	0	0	0	0	0	0	0	0
2310057M21Rik	1528.72	1902.59	910.057	1386.35	1255.58	1080.09	815.415	1628.83	1151.02	2608.22	957.528	105.748	2149.22	1173.72	1299.07	329.655	547.101	370.323	1376.15	1714.15	328.976	440.07	930.876	755.417	792.601	741.612	1897.36	2757.87	5214.07	1577.53	1173.57	4383.69	274.921	0	1215.32	1258.02	612.069	359.092	1388.24	2293.35	31.8382	1079.06	693.989	570.082	1772.73	16.0103	0	1092.99	1985.23
2310061C15Rik	1294.48	1259.08	1013.91	483.298	579.133	1584.34	1438.59	1205.42	1740.91	1635.26	1731.38	1432.4	1289.72	242.718	1253.53	301.236	2958.4	916.847	1224.58	1386.44	2329.03	1493.35	765.869	1164.45	944.713	2389.37	1220.7	12608.1	3878.52	209.071	294.373	6004.19	1807.7	707.527	2863.25	1515.26	771.207	1651	662.361	388.905	264.655	1497.03	1608.14	5835.76	3117.7	800.513	95.0756	2200.02	1862.56
2310061I04Rik	1638.65	1660.29	1109.38	1923.58	2132.81	2004.55	5353.5	1654.19	2178.97	5125.64	3740.3	3085.91	1980.74	332.429	1281.82	531.427	2087.09	624.173	2241.82	1700.54	684.154	1321.98	1736.28	1394.47	1308.44	884.655	1311.25	18712.8	3946.86	3136.06	2429.56	17011.5	6422.98	0	6068.72	7493.16	1860.69	8584.09	3243.75	511.338	979.024	2674.18	3924.63	6375.51	2750.28	1136.73	3533.64	1553.52	1911.8
2310061J03Rik	693.792	504.778	652.59	350.104	996.242	357.956	586.279	471.19	787.504	672.084	191.776	1182.45	852.834	437.092	365.274	609.104	1129.66	642.092	1227.88	742.637	328.976	596.837	687.828	760.865	582.066	583.836	774.345	281.246	1076.42	1178.4	576.972	735.671	932.095	0	427.144	426.843	593.707	289.475	544.406	416.147	1377	1185.68	387.677	673.638	691.928	202.797	1880.38	918.868	1159.04
2310067B10Rik	1110.96	1517.55	524.398	1067.66	1920.52	1108.11	9969.02	2217.51	1967.5	3042.63	3920.6	1278.59	5752.82	393.234	1211.35	1726.9	22.7959	137.378	2132.58	1464.86	1448.37	733.548	792.902	1315.85	1801.66	13092.4	3026.79	9855.2	4356.93	5207.76	5204.52	8524.69	2218.2	0	4088.7	2620.49	2944.05	8038.44	1755.71	649.428	437.775	2030.16	134.012	3203.97	1582.32	720.462	2651.55	1406.15	2667.64
2310068J16Rik	20.1718	33.8528	20.554	45.7269	90.3995	0	51.4759	20.9499	11.3401	81.0062	0.675267	0	82.8087	0	19.1745	0	0	26.8783	29.1173	18.2568	43.6694	17.6972	4.33559	20.2378	1.34613	23.9428	0	41.3598	0	0	0	0	0	0	185.637	114.365	465.173	42.926	0	22.5452	0	0	23.9307	16.7364	14.7504	144.092	316.919	6.14041	3.07788
2310069B03Rik	0	0	42.7307	117.248	0	0	0	0	0	0	0	0	0	0	0	0	0	0	0	0	0	0	0	0	0.269226	0	0	64.5212	0	0	0	0	0	0	243.287	73.842	0	197.019	13.6102	0	0	0	0	0	0	0	0	0	0
2310079F23Rik	622.567	531.599	145.23	359.015	1127.67	684.785	167.638	374.648	825.094	826.085	388.954	456.638	355.03	897.609	286.179	388.387	0	268.783	513.992	487.954	0	437.12	512.364	404.368	369.647	922.104	724.433	86.0283	19.9337	0	602.484	146.629	5.64906	84.2294	565.816	385.419	477.414	324.696	3570.4	487.854	3555.93	481.95	114.867	384.936	564.538	0	2493.09	252.195	368.686
2400001E08Rik	8422.03	8469.53	9223.62	7929.98	16252.3	17558.5	15916.1	16581.1	9269.23	7973.77	11345.2	15828.5	8162.84	5693.16	5482.47	3860.18	11116.8	16569	8025.01	8602.27	6422.31	17483.2	10283.8	7049.39	16573.5	8435.84	8208.34	16993.9	9511.2	17495.4	7948.08	7531.15	13098.3	5744.44	8940.31	10958.6	27157.5	13619.6	6024.76	2436.76	10158.4	3535.72	9782.85	11247.9	18494.3	21976.8	6940.52	7677.7	12073.9
2400003C14Rik	8463.29	9857.99	6447.74	17403.2	7488.77	5552.99	10249.2	11473.9	10027.1	6528.12	10673.3	4575.99	10797.5	9540.27	10003.8	12641.5	6438.57	23924.6	10787.2	9255.12	11207	14974.3	11147.8	9015.18	9081.25	9015.99	7325.61	8793.09	20372.2	16953.7	11427.6	14971.3	9840.66	10073.8	9564.34	10388.3	4266.12	23434	8483.67	24876.5	13909.3	10483.5	10098.7	9904.78	7336.31	4653.65	5894.69	7812.79	6186.1
2400009B08Rik	148.693	6.62992	123.865	19.6977	4.46842	485.575	118.44	1585.82	41.7902	627.575	425.418	0	8.56641	0	35.9522	0	0	937.753	104.905	160.909	0	732.516	0	0	113.882	15.9619	35.6512	39.7054	0	0	0	0	0	0	74.7892	78.0444	0	8.80533	0	14.717	0	0	0	310.669	115.321	341.552	68.6657	38.5969	32.0979
2410001C21Rik	7804.79	7838.58	6608.93	8268.12	14045.5	13213.2	8001.09	12916.4	10284	7054.21	9625.25	13083.9	9843.76	8489.16	4585.1	9182.03	6664	6624	10439.3	6994.18	17847.7	16084.5	11072.1	7842.55	16968.2	7270.01	11251.5	7156.89	15340.4	22684.2	6164.18	13537.9	9170.31	28604.3	8076.34	7785.53	4786.38	14064.3	8247.76	4270.13	15855.4	3770.3	11907.9	15794.9	11140.6	14964.3	15713.9	9124.21	10929.5
2410002F23Rik	2906.91	1813.38	3063.36	3191.5	1958.67	3420.81	2790.18	6030.03	1387.27	6218.34	8110.63	1153.61	2627.99	3504.71	2382.91	4394.45	2292.25	1134.86	2295.52	3305.39	2391.63	1453.68	1411.62	3697.69	1142.59	3227.36	3017.52	3222.75	4408.18	456.154	2115.56	2368.81	975.405	3065.95	4601.2	4760.71	4051.9	648.842	26190.5	5336.02	2527.15	2072.81	2967.4	889.119	345.964	869.891	3301.24	1604.4	1483.32
2410002I01Rik	636.365	914.93	299.386	1039.06	1699.33	1117.45	869.624	691.96	707.283	618.228	2210.15	629.68	596.793	301.529	569.483	599.631	0	433.039	930.307	789.026	633.206	847.547	687.318	675.633	873.637	1157.23	1446.73	914.878	0	4941.67	2139.11	948.03	643.993	0	1486.55	1632.63	238.707	3423.9	99.8078	10.0201	370.119	0	3493.88	2281.37	999.004	1937.24	264.099	621.497	442.335
2410002O22Rik	4940.26	5820.37	4573.81	5374.9	4526.85	6402.74	8207.9	6123.38	5702.79	7991.13	7140.27	13492.5	4391.71	3170.79	3887.15	2978.26	5377.29	1785.91	5113.08	4522.21	2043.73	2805.15	2721.73	5009.65	3420.51	7368.85	7612.96	5773.82	8306.64	1320.95	3518.74	11543.2	5451.34	8406.09	5726.94	5180.95	1554.66	3805	3720.11	3083.37	3321.12	6551.11	291.954	7993.7	7680.93	2593.66	1853.97	6136.9	6812.88
2410003K15Rik	3104.75	2040.81	3975.58	3459.3	2620.17	1593.68	3132.29	1959.98	2603.38	1953.05	2543.05	3364.7	2352.91	6873.36	5145	1168.95	3819.58	1305.09	2226.13	2989.8	711.811	2132.8	2796.2	2163.5	2380.76	1402.8	2727.32	5373.46	3451.37	180.561	1232.44	3976.67	8016.02	2830.11	3740.91	3543.22	2136.12	2965.74	1701.27	4344.34	1380.98	2789.34	1507.63	6580.53	2398.95	3095.32	3776.61	4843.03	3448.1
2410004B18Rik	2904.87	3325.01	2774.79	3480.4	3206	1581.23	6545.19	6703.73	3369.47	4447.33	4928.1	16871.6	2055.94	2718.25	4145.05	2091.6	3143.3	3506.12	2622.83	2658.77	2158.72	1650.41	2955.34	2685.41	1581.16	1573.47	3858.89	3128.45	4450.9	912.308	3436.32	3514.03	2169.24	0	2578.11	2410.37	7057.16	2169.69	5711.73	3537.1	3040.54	4269.31	1320.97	1284.52	4063.06	4952.51	1193.73	3703.11	4318.04
2410004N09Rik	172.019	491.217	210.138	611.568	249.028	49.8026	336.643	413.608	229.531	291.088	415.964	33.647	138.966	1261.94	268.443	589.211	600.291	373.309	161.694	142.901	37.8468	238.617	337.411	472.476	208.381	142.429	206.064	175.365	108.211	190.064	802.658	303.37	506.532	2914.34	964.024	430.145	67.3276	253.153	353.864	1486.42	1418.79	234.578	885.435	1096.23	136.776	1051.34	295.791	189.475	271.953
2410004P03Rik	728.091	0.803627	212.572	2.34497	0	0	3284.89	0.122514	0.420002	101.035	146.533	245.143	30.4584	0	327.884	265.24	0	0	66.7013	486.046	0	294.068	139.759	0	35.807	0	0	277.938	0	0	0	0	0	0	30.1605	119.468	0	17.0603	0	430.238	0	0	0	0	0	0	0	138.598	182.474
2410006H16Rik	3556.55	1453.66	9509.75	4699.79	2088.9	5789.55	1226.77	2587.62	1744.48	2480.93	1637.52	644.1	2170.16	13697.9	3653.7	4795.15	13644.6	4646.95	2986.48	6027.81	4675.54	6945.26	8284.29	6796.8	3962.46	2394.28	6150.55	1798.32	1702.9	9769.3	2227.43	106.179	4607.75	9720.07	8724.07	4991.54	6953.11	1807.29	5539.33	9248.55	7511.82	9404.43	1407.12	2719.66	1111.64	3271.43	3840	2428.09	1740.98
2410015M20Rik	6280.6	5308.46	6849.36	11849.4	3954.81	4572.5	11920.1	7217.8	4355.63	9501.31	4398.69	13348.3	5375.9	7493.86	4874.16	3613.89	16755	7436.32	4841.11	5728.73	3058.31	6372.02	6371.78	6658.25	5460.97	6912.1	6904.93	33206.9	6094	7003.87	3569.77	29209.4	21170.8	3840.86	18836.1	15567.8	40831.1	22243.9	10806.5	5484.13	7708.82	5621.33	4503.75	29768.7	5308.8	7033.85	9935.4	4722.85	7017.56
2410016O06Rik	1363.34	2098.67	585.79	3512.76	6257.42	2639.54	659.165	1102.87	1425.49	1508.41	2277	845.982	3175.28	4026.03	2268.82	1356.51	4625.03	940.739	2200.11	692.68	4381.49	1098.4	2998.95	4391.61	1793.04	1312.56	2220.36	296.136	820.127	2223.75	4499.99	998.592	860.54	151.613	3096.07	1743.09	4002.93	1422.34	3969.63	4327.12	2644.56	6751.57	4384.1	802.299	5235.05	1483.62	1690.23	1606.59	9650.03
2410017I17Rik	109.467	0.100453	88.166	7.2694	0	0	0	0	0	0	0	0	0	277.606	34.9935	0	0	0	0.413011	31.4515	0	0.884859	0	0	0.807677	2.45567	0	0	0	0	0	0	0	0	7.01149	0.900512	0	171.154	0	60.1206	0	0	0	0	0	0	0	0	17.8077
2410017P09Rik	1167.93	1371.59	1067.46	1256.67	1220.09	650.546	1336.1	1027.4	1064.28	1707.81	989.941	240.336	517.792	439.584	711.374	604.367	2056.69	1221.47	714.716	1011.51	112.085	2022.05	869.158	738.681	1582.24	702.936	1505.19	1776.82	617.943	883.799	2154.81	1307.02	883.137	0	1651.37	1859.86	1934.14	1753.09	925.491	456.854	766.106	1019.35	416.394	3339.95	1058.01	2801.8	718.349	935.974	1922.36
2410018L13Rik	59.1356	76.9473	52.7373	135.07	0	0	0	6.98331	8.61004	139.313	74.2794	0	3.80729	0	0	0	0	0	81.3632	57.4259	8.73388	0	0	39.6973	0.538451	15.3479	44.9205	11.5807	11.3907	0	0	0	0	0	78.5732	3.60205	0	13.208	154.248	0	0	0	0	0	0	0	0	1.7544	45.0689
2410018M08Rik	464.543	46.7108	387.552	124.752	465.79	510.476	27.3323	116.266	161.071	564.373	211.359	19.2269	48.543	174.937	171.132	23.6821	50.6575	44.7971	115.85	315.345	34.9355	86.8636	43.3559	9.34054	103.383	85.3345	255.263	51.2861	17.086	19.0064	21.5874	4075.27	45.1925	0	127.431	447.254	6.12069	79.5231	195.079	568.641	9.94943	162.072	0	410.041	10.7276	16.0103	755.323	366.67	95.4142
2410021H03Rik	23.9171	0	0	72.9285	112.613	52.9152	0	720.629	0	259.042	229.591	0	1.90365	0	64.2346	0	0	0	0	44.0653	0	0.294953	1.02014	0.778379	0	21.4871	0	0	1238.73	0	0	0	0	0	95.0446	46.2263	244.828	402.018	322.107	271.169	0	0	0	0	0	0	0	0	0
2410022L05Rik	607.454	815.28	1311.13	1615.68	1619.67	933.798	2807.49	2568.27	1636.96	6338.96	5471.69	2153.41	1241.18	681.804	498.058	832.663	0	1361.83	1001.55	1192.09	339.166	776.906	75.2352	135.049	856.138	323.535	1148.68	2456.77	1008.07	0	771.258	1939.04	3005.3	0	1783.48	1403.6	39166.3	3789.32	2536.03	503.51	5.96966	0	0	1834.72	3368.45	955.279	1378.6	957.904	930.179
2410042D21Rik	1108.86	2997.13	931.692	1896.85	863.006	865.32	1516.95	1410.38	2269.06	1378.89	2651.77	3042.65	818.568	1534.56	1213.75	2629.66	1079	480.822	1534.75	2180.94	1066.99	915.829	1048.7	1775.87	1018.21	1634.25	2119.11	440.068	412.911	532.18	1365.89	1473.87	591.268	33.6917	1278.54	1086.62	2466.64	473.561	1347.41	2224.15	2475.42	1066.26	291.954	1072.17	1186.74	672.431	2281.81	1352.21	1605.77
2410066E13Rik	2400.71	611.962	1423.1	121.938	95.8562	15.5633	133.017	856.007	960.334	1613.89	326.829	197.075	1859.86	342.896	2143.71	298.395	141.841	0	1665.26	1937.88	186.323	257.051	103.799	781.103	485.952	1327.29	452.771	220.034	341.72	0	64.7622	3119.65	419.914	0	72.6746	32.1183	116.293	26.1408	412.841	940.637	43.7775	1002.29	1612.93	116.108	0	0	0	575.444	592.712
2410075B13Rik	523.679	1658.39	332.651	158.52	1471.27	1699.51	2.73323	552.784	1744.27	1205.75	3201.44	0	1261.17	0.498395	39.7871	535.216	496.444	0	1058.13	361.734	315.875	276.518	504.203	626.206	1375.47	1169.51	2936.23	100.918	862.842	0	1234.41	2.52808	1137.34	0	2000.28	1386.79	569.224	761.385	7458.37	0.626256	195.009	1194.21	1244.39	794.977	973.526	0	10.564	701.761	1334.04
2410076I21Rik	65.3777	77.1482	111.965	51.1203	346.646	964.925	73.7973	20.8274	130.621	316.458	57.3977	0	57.1094	57.3154	264.608	99.4649	0	71.6754	94.1665	372.522	253.282	311.913	58.1479	77.8379	227.227	3.06959	56.3289	4.96317	877.081	0	0	0	0	0	58.7629	65.7374	0	42.3756	113.418	82.3527	0	0	0	232.217	630.244	0	480.66	118.422	30.7788
2410089E03Rik	1869.01	930.299	1407.68	610.395	1424.52	1201.49	2072.25	1646.96	972.305	4053.42	2425.56	3456.03	1539.1	1964.67	1843.63	1943.83	329.274	1445.45	1205.79	1587.43	244.549	783.395	1053.55	1642.77	1019.56	2013.65	1388.26	870.209	512.58	1539.52	3200.82	3233.42	922.68	5542.29	393.979	125.171	1022.16	692.594	2409	1695.59	959.125	341.204	531.261	874.475	1516.61	80.0513	596.864	2160.99	1495.19
2410091C18Rik	4738.93	1991.09	3163.7	3175.56	8112.07	9095.2	4349.49	4409.16	8830.96	5080.69	6038.24	2057.27	4422.17	1614.3	3168.11	2972.58	916.901	6919.66	2318.44	4282.55	3829.8	4133.77	2762.79	1508.11	2989.48	3181.32	2349.42	7630.05	757.479	2698.91	6173.99	5928.35	5061.56	16071	3807.46	5603.29	1603.62	1849.67	2272.9	1276.31	2819.67	4158.42	1521.99	4604.59	2825.37	3009.93	2192.02	2622.83	3766.88
2410127L17Rik	2146.16	1212.77	2074.6	1461.85	992.032	1550.11	1675.02	1079.84	957.814	1398.47	3623.48	2586.01	1285.91	2269.19	2607.25	2019.61	1350.02	785.443	1250.8	2025.67	2656.55	876.748	1293.54	2052.58	917.521	1550.76	1449.58	4407.3	1913.63	1748.59	229.611	2411.79	1568.56	488.53	2526.14	2077.18	153.017	1072.6	3461.52	2046.29	2119.23	2849.05	5709.86	2495.81	603.425	576.37	961.32	1304.4	828.169
2410131K14Rik	959.311	460.78	973.341	1586.37	1235.56	155.633	2551.02	1388.58	466.202	1419.39	2439.06	2451.43	3135.31	163.972	292.89	486.904	1942.72	513.674	524.73	617.744	8.73388	433.433	2386.36	798.617	1850.39	4965.98	60.6071	1495.57	2278.13	9436.69	1713.25	2510.38	1534.66	0	887.899	855.787	6.12069	351.112	1451.75	928.738	1142.19	2128.26	33.5029	1632.84	492.127	0	31.6919	1555.28	632.944
2500003M10Rik	7605.1	8599.21	7989.03	10875.3	6217.16	2051.24	9509.83	11925.2	7288.5	11401.8	14560.1	5599.82	7724.05	15376	9069.54	9503.16	6484.16	3604.67	8946.64	7014.35	8633.44	5698.64	8690.56	9028.03	5959.31	8402.08	8126.34	4475.13	13153.4	6737.78	9200.15	5882.84	6070.86	13678.8	6601.48	6048.74	2748.19	6907.78	7145.33	18652.4	11282.7	4798.18	9754.14	6062.75	5397.3	3287.44	5461.57	7224.19	7726.8
2500004C02Rik	520.196	566.859	459.491	398.879	1024.64	0	865.069	1133.01	1063.23	972.964	1115.54	1557.38	1121.25	690.775	206.126	2.84185	119.045	2.98647	532.991	264.475	772.948	144.969	213.719	238.573	144.574	426.059	2521.25	406.98	0	4095.88	9.81245	490.448	536.661	0	1419.99	1430.31	6738.88	1040.68	789.389	175.352	5.96966	0	9.57227	523.011	281.598	0	79.2297	687.287	1570.6
2510002D24Rik	3605.43	4181.17	2720.43	4298.56	3071.65	2219.33	4639.67	1342.02	9767.99	7321.71	2447.17	980.57	5587.2	3164.31	2659.98	2126.65	13092.4	155.297	5834.19	3148.47	3126.73	1649.97	6032.59	5582.53	1952.16	1243.18	3975.11	6715.17	5715.26	38.0128	2090.05	9583.95	4916.57	4801.07	11810.2	12510.5	8146.64	7272.1	20433.4	2887.04	5531.88	1279.51	11089.5	5625.51	2562.55	1174.09	5936.94	2988.62	3604.2
2510003E04Rik	7269.81	4816.24	3687.83	2999.68	8243.33	5440.93	19915.7	35875.2	3266.36	12750.9	14618.9	30618.8	6290.6	5977.25	4418.28	2843.75	395.129	2460.85	4316.58	5076.55	605.549	2695.43	1112.46	2701.36	4854.68	6317.21	7369.82	5444.6	8246.84	4000.85	4656.99	10774.7	2745.44	17267	3000.36	2894.55	10013.5	2221.14	3638.45	2783.08	670.591	2170.91	2000.6	2028.24	3169.99	4093.29	5165.77	7423.75	3964.31
2510006D16Rik	13783.7	14970.1	11794	12841.5	13017	8394.85	6803.02	14651.1	15315.6	8581.76	8648.82	13886.6	8095.26	18287.6	14739.4	9909.54	17193.2	14738.2	13920.9	13337.9	12611.7	15196.6	9933.09	15425.9	12419.1	12714.8	16420.2	10743.6	16132	7460.02	9714.32	11310.6	22494.6	4043.01	17492	24340.5	22744.5	24443.9	12902.4	10896.9	7871.99	19013.6	7877.97	9292.86	14460.8	8923.06	9285.72	12419	19796
2510009E07Rik	2399.13	2088.53	3922.84	220.896	3284.8	2627.09	9518.03	3835.43	4170.62	4127.75	6468.38	2638.89	2909.72	1364.11	4471.49	3032.26	0	2514.61	1884.36	4349.18	13.1008	1148.69	22.443	275.157	4327	3043.8	3084.54	2747.94	5683.94	1748.59	5675.52	217.415	1681.54	16.8459	989.176	2050.77	3011.38	853.566	1801.08	682.932	0	0	1124.74	688.283	9892.15	9019.12	0	4418.02	4025.21
2510012J08Rik	2948.7	5292.99	1895.57	1694.24	2154.42	1360.23	2018.49	2544.62	3827.69	1410.49	2657.17	1576.6	2905.92	638.942	1317.77	2934.69	2869.75	883.996	3320.4	2077.54	3860.37	1641.27	4650.3	1944.78	1987.42	1311.33	2635.34	415.252	3850.04	969.327	8882.23	2113.48	1585.5	1196.06	2006.95	1798.32	2999.14	1516.72	1900.89	2036.27	4099.16	1573.8	8562.39	2936.18	1855.87	2668.38	2630.43	1937.3	2295.44
2510039O18Rik	3681.19	5774.06	3338.95	6969.72	16863.3	18103.2	1736.97	6126.44	4421.78	1778.13	5369.72	2835.96	6098.33	2742.17	2835.43	1952.35	4283.09	2637.06	6613.96	4381.22	4224.29	5897.88	4558.74	6152.69	8136	5415.98	4063.53	2228.46	7993.39	19111	5687.29	596.627	1615.63	12651.2	7440.3	7951.82	12382.2	10572.2	5371.48	2141.17	9822.07	2298.86	12506.2	1645.39	8403.7	10145.2	9666.02	8693.94	5303.19
2510049J12Rik	7.49051	0.60272	33.5355	0.937987	26.3809	15.5633	63.7755	16.0494	0.420002	23.1446	12.8301	0	15.2292	0	0	0	0	0	92.308	94.7694	0	2.21215	2.55035	0	4.57684	2.45567	0	167.093	0	0	0	2169.09	2849.01	0	3523.22	6922.24	18711	16551.5	6868.59	0	0	0	985.943	8116.09	0	10.6735	5.28198	0	0
2600006L11Rik	33.4445	73.5319	69.7755	0	0	0	0	3.79794	11.5501	6.23124	0	0	0	0	0	0	0	0	21.0636	70.7036	0	3.39196	0	0	0	27.0124	89.1281	0	0	0	0	0	0	0	3.22751	0	0	2.20133	0	0	0	0	0	0	85.8205	0	0	12.7194	378.799
2610001J05Rik	15298.5	8319.95	9429.97	7941.24	8474.66	6592.62	10709.3	12189.5	12714.5	6030.95	13115	26100.5	5909.87	6891.8	10163	8977.41	9060.1	12976.2	8124.75	10804.2	5627.53	7850.47	4822.19	4634.47	12661.4	8638.43	12189.9	9168.63	8266.77	4856.14	5259.47	3994.37	6411.68	4059.85	5061.96	4017.49	4015.17	2951.16	4935.95	5323.18	3995.69	6525.52	2115.47	4277.19	9542.16	12242.5	7875.43	7055.77	9932.97
2610002D18Rik	30.5534	24.2093	2.43403	64.7211	31.9234	1092.54	0	11.7614	1.26001	425.505	19.5827	0	0	0	0	0	0	0	130.305	71.8654	0	37.6065	59.4231	63.4379	79.1524	0	0	31.4334	0	0	0	0	0	0	754.681	39.3224	12.2414	21.463	626.067	0	0	0	0	0	0	0	0	0	0
2610002I17Rik	1263.73	1355.92	1661.9	941.036	680.016	1621.7	3003.37	2764.17	1357.24	2037.17	6069.97	2811.93	589.179	618.01	865.729	622.366	415.392	406.16	924.319	1441.46	0	576.043	1961.98	519.957	391.993	295.294	813.561	332.533	2224.03	1225.91	1779.98	2050.27	1212.67	0	1421.44	1841.55	4449.74	1229.72	1252.13	1241.87	654.672	882.865	0	2637.02	1520.63	112.072	1109.22	1192.12	1392.74
2610002J02Rik	5940.5	2888.64	4510.26	3084.1	4584.42	4899.33	5937.5	1555.81	4217.45	4935.59	5702.63	1379.53	5838.49	3543.09	3215.08	2849.43	7130.04	5265.15	5622.53	4752.74	2877.81	3651.96	3838.53	4927.53	4212.31	7633.45	9158.09	2675.15	2628.39	4428.5	3293.06	1812.63	4080.51	2442.65	3875.91	3423.15	134.655	2094.57	5058.44	1973.65	2765.94	1863.83	5460.98	3647.48	1669.48	6633.59	1378.6	4152.23	4739.05
2610002M06Rik	1735.83	1139.64	1539.93	1315.53	633.613	1151.68	1264.12	817.047	1786.06	2368.32	1399.15	38.4537	2285.33	259.664	1667.7	574.054	2624.06	794.402	1489.32	1809.83	1909.81	952.403	1055.33	2122.25	1284.21	1090.32	714.451	2513.02	2594.22	28.5096	1566.07	740.728	282.453	572.76	1324.95	1988.93	1113.97	1817.47	3103.12	388.279	2061.52	4132.83	3307.22	2360.87	1770.05	336.216	0	1324.14	2309.29
2610005L07Rik	1098.87	1080.18	725.611	805.028	1414.17	1136.12	1550.66	1599.42	878.434	1634.37	2259.44	2004.4	1046.05	1186.18	895.928	871.502	1618.51	761.551	771.918	656.913	590.992	384.029	1073.19	927.049	730.409	1054.1	931.21	415.252	1099.2	294.6	539.685	616.852	289.985	16.8459	797.863	837.176	2093.28	1539.28	1769.32	1393.42	541.249	1057.73	1143.89	493.723	1492.47	192.123	1193.73	1186.41	765.073
2610008E11Rik	1647.06	1309.61	1133.72	418.342	1802.23	62.2532	3662.53	1145.88	1007.58	1529.77	4520.24	884.436	1856.06	471.482	290.973	209.35	2079.49	229.958	700.467	1207.11	2.91129	683.259	644.727	581.449	451.222	1360.44	9047.57	2961.36	1406.75	2508.85	682.946	126.404	3.76604	202.15	759.912	482.975	1224.14	428.984	721.338	1051.17	3078.35	230.313	100.509	623.429	2577.3	202.797	316.919	1650.45	953.483
2610015P09Rik	1324.51	841.297	928.988	758.363	1008.7	731.475	1531.07	801.243	777.004	736.177	542.915	9166.41	959.438	967.883	676.38	874.344	620.554	2281.67	886.941	874.086	489.097	658.777	671.251	675.633	752.217	1695.64	1140.13	794.107	640.725	361.122	343.436	6785.37	996.118	0	2071.5	1269.42	4982.24	610.594	4473.21	444.329	670.591	0	3316.79	785.563	301.713	122.745	0	585.532	620.193
2610017I09Rik	1.64266	0.200907	44.6239	0.937987	6.65966	3.11266	22476.3	6009.32	480.272	4271.52	3308.13	2879.22	46.6394	1.49518	1.43809	0	0	0	0	0.0829855	1.45565	0.442429	0	0.778379	0	0.613918	0	3.30878	0	0	0	9892.38	3.76604	0	0.222587	0.900512	0	1.651	0	0	0	0	0	0	0	0	0	31.5792	0.659545
2610018G03Rik	373.737	6.52947	21.0949	2793.09	607.92	1157.91	2.2777	18.6222	0.630003	448.65	65.5009	0	0	72.2673	769.377	1.89457	4500.92	400.187	14.4554	479.656	4451.37	177.267	1654.41	5457.21	327.917	0.613918	573.272	0	894.167	0	3.92498	434.83	0	2880.64	268.106	651.371	471.293	19.2616	81.6609	138.403	1327.25	2640.06	6375.13	4.18409	0	891.238	52.8198	63.5971	0.659545
2610019E17Rik	42.3805	11.753	67.6119	79.7289	42.6648	65.3659	122.996	38.2244	70.5603	215.868	42.5418	19.2269	61.8685	169.953	55.1267	100.412	159.571	0	76.82	72.1973	11.6452	66.5119	68.8593	89.1244	81.8446	4.91134	49.9117	1.65439	5.69533	0	127.562	285.673	1278.57	0	239.058	81.0461	312.155	134.832	122.491	127.443	33.8281	55.4456	38.2891	55.4392	14.7504	5.33676	36.9738	68.4217	22.4245
2610019F03Rik	211.574	4361.28	522.235	2536.32	2.19124	3.11266	151.695	181.076	32393.1	1337.49	1393.75	466.251	152.292	0	188.869	4540.33	2130.15	0	4940.85	436.255	0	156.03	17.5974	12935.1	150.228	3.68351	1520.17	1060.46	2.84766	0	9814.41	63.202	3694.49	0	42.6254	5.70324	0	289.75	81.6609	0.939384	0	6521.26	311.099	3641.2	3475.73	5.33676	0	482.022	2588.28
2610020C07Rik	123.331	76.8469	184.445	84.8879	160.82	21.7886	4.09985	124.719	61.7403	170.024	366.67	1014.22	73.2904	64.7913	165.859	0	0	283.715	43.5727	41.2438	566.246	14.7476	56.1076	8.17298	25.3072	403.958	12.1214	1.65439	0	0	180.549	0	9.4151	0	114.521	93.9535	0	41.5501	31.757	172.22	0	115.156	33.5029	21.9665	5.36378	0	0	76.3165	80.0249
2610020H08Rik	258.094	421.101	454.082	324.544	424.5	526.04	191.326	333.606	307.441	401.47	216.085	134.588	172.28	280.596	1137.05	1084.64	0	0	350.853	719.484	1598.3	274.159	225.451	1047.31	672.257	504.64	0.713024	109.19	17.086	4970.18	96.162	7.58424	13.1811	0	493.698	285.763	728.362	389.085	2268.36	610.913	0	1838.24	1033.8	351.463	175.664	90.7249	0	675.884	337.687
2610021K21Rik	12.4842	0	45.7057	48.7753	12.1163	1297.98	126.64	9.43359	0	438.858	0	0	293.162	0	0	0	0	0	30.9758	36.2646	0	111.787	19.3826	213.665	114.152	115.417	0	0	0	0	0	0	0	0	407.111	26.7152	12.2414	28.067	18.1469	0	0	0	0	0	0	0	0	0	0
2610027L16Rik	2566.95	3784.98	1506.12	3364.56	3822.09	3237.17	1711	2011.19	3599	1681.1	2385.72	552.772	3865.36	3586.45	1519.58	2899.64	3720.79	1125.9	2424.58	2174.55	5016.16	3185.49	4874.48	4534.06	3964.89	1428.59	892.707	1581.6	2770.78	0	5628.42	10.1123	1901.85	0	3080.38	2574.56	324.397	2184.82	653.288	4551.32	16438.4	9374.57	8490.6	4149.57	1526	4936.5	9338.54	3192.57	2645.22
2610028E06Rik	0.0657063	0.60272	740.486	4.68994	0	0	0.455539	0.122514	0	8.90178	98.589	0	0	0	0	0	0	0	0	0	0	0	0	0	0.269226	0	0	0	0	0	0	0	0	0	0.222587	0	0	7.97983	0	0	0	0	0	0	0	0	0	0	0
2610029G23Rik	4607.19	3625.26	5953.1	3402.55	1846.66	4687.67	3410.62	3695.64	2694.73	3061.77	2347.23	3532.94	2595.62	6201.03	5206.36	2172.12	13771.2	8777.25	3413.54	4888.26	3957.9	3772.01	5721.7	5360.69	2311.84	1841.75	3432.5	4321.27	1104.89	2565.87	3143.91	1799.99	1677.77	3857.7	4090.26	4289.74	1346.55	1651.82	3597.62	6186.16	7101.9	2158.11	5025.44	5102.5	1803.57	2753.77	1336.34	3089.5	4341.79
2610029I01Rik	530.775	493.025	794.575	109.276	651.1	1652.82	969.387	683.262	510.092	1584.96	2426.91	5998.78	810.002	6.47913	738.218	128.831	1334.83	1325.99	989.368	985.701	1624.5	1938.28	793.668	387.633	1024.67	535.95	778.623	7370.31	2426.21	351.619	2890.75	508.144	359.657	0	622.353	859.989	960.949	937.217	939.101	1.87877	31.8382	2559.03	2292.56	7469.64	1158.58	709.789	459.532	687.287	920.506
2610034B18Rik	8600.23	3045.04	7678.28	3239.11	75.7912	6.22532	3697.16	2375.8	3505.97	2383.01	3767.99	3792.5	4982.8	1918.32	6403.8	928.339	7.59863	289.688	3934.76	6621.08	0	1052.54	9.18124	68.1081	2274.42	6782.56	4299.54	1422.78	4075.01	161.555	3208.67	3412.91	1649.53	0	5846.91	6239.05	1175.17	4162.17	3420.69	1675.24	9.94943	0	14.3584	1887.02	1363.74	0	5.28198	6157.95	4106.33
2610035D17Rik	4282.01	4301.41	1584.82	24935.5	2214.02	12.4506	6707.36	7543.81	4840.1	2870.38	16366.4	4941.3	3645.48	3317.32	908.871	1741.11	5187.33	170.229	4073.53	1810.24	3311.59	1053.87	4335.59	2560.09	2013.54	4903.97	4774.41	2531.22	2665.41	19.0064	3457.91	2914.88	7419.1	6131.9	6971.2	6857.7	28008.3	14857.6	19489.7	1157.32	5249.32	3360.86	3393.37	205.02	1019.12	10.6735	5329.52	2955.29	3093.49
2610039C10Rik	1190.66	3182.87	623.382	512.376	1413.18	2256.68	256.469	448.769	2752.69	1378.89	1125.67	24.0336	1235.47	249.197	586.74	2132.34	1005.55	2395.15	3117.41	846.701	5530	2543.67	2871.18	3512.82	3342.44	1556.28	3008.96	339.15	3815.87	3763.27	1728.95	2.52808	80.9699	0	1720.26	522.897	73.4483	427.609	27.2203	198.523	1886.41	545.926	3747.54	695.605	2728.82	208.134	4341.79	1489.93	2409.32
2610044O15Rik	1297.83	1123.57	1299.5	302.032	904.855	130.732	1649.05	1002.41	3534.11	1511.97	1639.55	538.352	451.164	240.226	861.414	796.666	1426.01	1379.75	2176.36	1352.33	829.718	642.408	1565.91	1437.67	564.297	2297.28	1982.92	1450.9	1668.73	0	9.81245	161.797	33.8944	0	961.575	587.734	0	568.494	272.203	286.825	455.684	844.479	1799.59	1096.23	1125.05	640.411	522.916	1821.51	1854.86
2610101N10Rik	6455.11	7795.38	4761.5	5416.41	5879.28	5163.9	7513.21	5180.88	6358.83	10151.1	5007.1	12752.2	8248.5	6997.46	4190.59	6017.15	7821.52	4402.06	6843.18	5170.24	9425.31	4284.78	6287.11	6192.78	4730.3	6443.07	6689.6	8381.14	7552.01	5635.4	7235.7	9166.82	9294.59	8170.25	6556.3	4768.81	9370.78	5615.6	5013.07	6517.76	6660.15	6947.76	8758.62	7847.26	6102.64	7695.6	2265.97	5793.48	6013.74
2610203C20Rik	4251.39	49.3226	510.876	0.937987	0.472621	0	9736.69	828.196	15.1201	2246.81	1948.82	4153	62.8204	2200.91	1319.21	71.9936	0	0	2.27156	536.833	0	0.294953	2.55035	2.72433	27.7302	645.227	452.058	157.167	284.766	0	0	0	0	0	1.6694	0.300171	73.4483	3.02683	0	2335	0	0	4.78613	0	272.212	5.33676	0	1753.09	285.363
2610203C22Rik	98.2308	1122.97	316.424	6.56591	2469.75	1621.7	440.962	0.735085	0	67.2084	2.0258	0	0	0	273.716	2087.81	5.06575	892.956	177.388	124.395	0	760.684	0.255035	1.55676	3109.02	323.535	0	102.572	0	1568.03	213.911	0	1052.61	0	16.4714	21.3121	0	2.75166	612.457	0	0	0	0	212.343	805.908	2241.44	31.6919	158.335	1059.67
2610204G22Rik	435.501	341.14	144.69	82.7774	1009.86	3103.32	419.096	390.33	280.981	451.765	754.948	2215.9	39.0248	48.3443	249.748	431.962	1306.96	0	53.0719	219.745	0	125.65	172.403	41.6433	67.0372	1113.03	558.298	3.30878	0	76.0257	478.847	321.066	156.291	0	236.721	209.519	110.172	105.114	117.955	170.968	0	503.276	4.78613	358.786	120.685	0	63.3837	298.248	638.22
2610206C17Rik	51.5794	9.34217	30.2901	30.7191	61.7415	31.1266	8.65524	12.864	25.2001	4.89598	8.1032	9.61343	44.7357	44.8555	19.1745	10.4201	2.53288	71.6754	19.8245	16.3481	32.0242	21.3841	46.9264	40.4757	40.9223	7.36701	6.41722	4.96317	11.3907	228.077	1.96249	2.52808	642.11	0	41.0673	76.8437	79.569	46.5031	13.6102	257.704	17.909	68.2408	62.2197	19.8744	1.34094	0	58.1018	14.4738	93.4356
2610301B20Rik	3298.06	845.014	2431.05	427.722	1645.49	669.222	6197.61	2399.56	1238.8	4144.67	5084.76	4912.46	2111.14	1204.12	1499.92	592.053	0	35.8377	978.836	2741.34	764.214	531.948	1349.13	1009.56	263.303	2454.44	1909.48	1783.43	236.356	446.651	2684.69	556.178	2743.56	0	791.074	342.795	985.432	275.717	1351.94	1547.79	1112.35	870.07	1311.4	1109.83	356.691	256.164	390.866	2145.63	591.392
2610301G19Rik	2166.6	1733.73	1019.32	1229	1187.44	90.2672	2197.98	3879.17	1433.05	3574.51	3628.21	2297.61	2676.53	1373.58	1125.54	736.987	324.208	17.9188	1351.17	2088	1963.67	1270.36	963.521	1785.6	2014.62	1095.84	2027.84	962.855	916.948	1986.17	4264.49	6686.77	3622.93	6536.2	2522.35	2403.77	2436.04	1089.93	4314.42	644.105	1100.41	12.7951	1517.2	1270.92	2162.94	2876.51	760.605	1829.4	2118.68
2610305D13Rik	856.81	10139.1	328.324	2.57947	1.46083	0	23.688	45.5753	2217.82	6.23124	220.812	1980.37	0	5.98074	117.444	8972.68	0	95.5672	4244.72	170.369	0	20.0568	1.27517	2.33514	116.575	1052.87	138.327	549.258	37.0196	0	2341.25	0	0	0	1.00164	1.20068	24.4828	4.67783	40.8305	2.50503	3.97977	0	0	11.5062	1.34094	0	0	294.74	965.794
2610306M01Rik	752.337	507.892	445.968	326.654	820.728	9.33798	2300.93	1379.75	987.635	1602.77	1347.16	1884.23	619.637	278.603	354.728	0	552.167	2.98647	705.423	471.191	0	297.902	90.2822	172.8	562.951	1069.44	1049.57	1596.49	566.685	0	559.31	202.246	2698.37	0	657.41	381.517	869.138	923.734	2218.46	196.644	115.413	4.26505	0	325.313	624.88	5.33676	924.346	955.711	1002.07
2610307P16Rik	53.5506	193.172	834.061	143.981	21.1391	0	102.952	22.2976	188.581	527.875	0	0	5.71094	999.282	109.295	188.51	27.8616	0	120.186	146.303	0	0.442429	0	0	0	126.467	47.0596	0	0	0	35.3248	0	30.1283	0	1.11293	6.90393	391.724	4.67783	0	885.213	0	0	0	0	0	0	0	220.178	861.147
2610507B11Rik	4806.15	4844.26	8037.17	7321.93	3910.42	10589.3	9047.92	4337.86	5089.37	5090.48	4115.75	14492.2	2362.43	5491.31	6189.53	9788.29	8611.78	9786.67	4487.78	4575.24	4515.41	4555.84	3295.56	3449.39	13134.4	3704.99	6323.81	14259.2	7700.09	8258.29	3950.49	11601.4	7865.38	2779.57	5505.35	4657.15	10460.3	7395.65	5421.38	4592.96	4841.39	818.889	3479.52	7005.21	11390	21277.6	6238.02	5612.77	3285.42
2610507I01Rik	1123.58	989.265	570.374	661.75	2728.57	283.252	3587.37	1879.86	1101.25	1484.37	2780.07	3225.31	738.615	633.958	940.03	1286.41	640.817	486.795	1446.36	998.398	58.2258	1212.55	475.895	460.022	1376.01	1676	1970.8	1667.63	506.884	0	355.211	6565.43	2043.08	2611.11	1398.74	831.173	1144.57	957.854	1415.46	413.955	0	1275.25	0	4353.54	665.109	277.511	47.5378	2552.66	9308.17
2610524H06Rik	1319.38	756.414	2070.55	657.998	351.458	115.168	1458.18	1439.66	381.152	2163.58	2605.85	3826.15	1145.04	185.901	889.217	2.84185	990.354	361.363	625.505	2027.42	873.388	1217.86	1102.51	842.595	1211.78	1536.64	259.541	211.762	370.196	0	818.358	2768.25	5.64906	7496.41	392.866	349.099	0	30.5435	3506.88	373.562	694.47	972.431	1517.2	79.4977	0	10.6735	2693.81	1651.33	532.253
2610528A11Rik	2.82537	1.10499	25.963	74.3355	1793.34	252.126	56.0313	46.3104	54.3903	45.8442	13.5053	9.61343	29.5065	4.98395	96.8312	16.1038	17.7301	0	5.98866	29.2939	10.1895	236.7	5.10069	0	182.804	1.22784	1.42605	1.65439	31.3243	1216.41	52.9872	0	15.0642	33.6917	50744.1	5639.01	1199.66	208365	6283.36	53.5449	1.98989	0	574.336	3.13807	0	1078.02	0	2.6316	1.53894
2610528E23Rik	1277.2	817.791	1023.1	1742.55	415.563	12.4506	668.731	786.541	617.193	1825.31	1079.08	96.1343	15346.3	2568.23	911.268	657.415	957.427	59.7295	803.719	724.38	267.839	301.147	297.88	639.438	324.686	1088.48	1163.66	15892.1	299.005	465.657	231.574	1754.49	561.14	606.451	1546.53	980.658	367.242	110.617	843.83	1375.26	5.96966	98.0961	622.197	1304.39	610.13	0	1272.96	2108.79	1214.66
2610528J11Rik	0.459944	0.401814	0.270448	1974.23	0.343724	0	2.2777	0.857599	0.840004	0.445089	0	0	0	0	0	0	0	0	1.03253	0	0	1.03234	0	0	0.269226	0	0	3.30878	0	9.50321	0	6980.03	9823.72	0	5116.16	6091.97	10809.1	10193.5	4346.18	0	0	0	0	2365.06	34.8646	0	755.323	6.14041	0
2700007P21Rik	8245.81	5339.7	4032.11	4422.85	9810.97	6710.9	5015.03	5306.7	4198.97	5475.04	15279.3	4614.45	3648.34	2417.71	3346.43	4202.15	3221.82	1824.74	3795.36	5244.35	1943.29	2634.96	1167.8	2186.86	4490.68	6457.19	8084.27	1614.69	2374.95	9949.86	6495.84	2325.83	1344.48	0	2659.25	4818.94	795.69	1523.32	2694.81	2337.81	861.62	481.95	2814.25	1907.94	5571.63	933.932	966.602	5641.72	5920.96
2700023E23Rik	328.203	478.058	303.983	652.37	411.997	168.084	1056.85	436.396	480.692	639.593	369.371	211.496	321.716	1164.25	477.445	991.807	574.963	149.324	722.356	138.088	298.407	136.268	266.256	386.854	116.306	113.575	573.272	241.541	261.985	0	225.686	0	173.238	16.8459	726.078	574.227	1132.33	339.005	376.548	1398.43	861.62	0	0	240.585	170.3	0	47.5378	484.215	697.14
2700029M09Rik	2405.97	1655.37	2110.57	1950.78	2867.39	4198.98	3140.03	2472.7	2570.62	5495.96	3585.67	3239.73	6498.1	3155.34	3219.4	2344.53	2689.91	3279.15	2244.3	2338.94	2077.21	2344.14	2305.51	3027.89	2385.34	2810.51	1927.31	3738.92	4274.34	1872.13	998.907	4108.13	3389.44	2173.12	2960.07	1634.73	13398.2	723.963	812.073	2366.94	1211.84	2072.81	2168.12	1971.75	1000.34	795.177	1309.93	1127.64	2279.39
2700038G22Rik	98.3623	343.752	687.749	589.056	416.465	90.2672	46.9205	86.1275	98.9105	421.944	163.415	0	132.303	3546.08	1729.54	1620.8	2158.01	651.051	133.403	482.394	8.73388	352.616	1315.21	339.373	50.6144	49.1134	111.232	3.30878	56.9533	0	29.4373	0	75.3208	16.8459	618.458	928.128	61.2069	440.266	757.632	4106.68	330.321	558.721	43.0752	1.04602	4.02283	298.858	5.28198	201.756	290.86
2700046A07Rik	59.5299	0	223.66	0	3.00759	0	349.854	821.213	861.424	24.925	0	0	0	0	0	0	0	0	182.344	26.6383	0	0	0.510069	0	0	0	3449.61	28.1246	0	0	0	0	0	0	0	0.600342	0	5.50333	0	0	0	0	0	0	0	0	0	17.544	392.43
2700046G09Rik	68.663	150.781	117.915	351.98	716.494	3.11266	636.844	464.206	39.6902	553.245	158.012	1038.25	53.3021	65.2897	115.047	0	0	220.999	18.5855	102.404	0	112.525	0	0	61.9219	70.6005	535.481	244.85	0	0	39.2498	1519.38	342.71	0	213.016	424.742	679.397	513.736	158.785	97.3829	0	119.421	0	246.861	378.146	0	0	227.195	225.784
2700049A03Rik	1418.86	1758.44	1213.5	676.992	1341.77	286.365	940.233	647.61	848.404	1525.32	1520.7	1417.98	1421.07	1123.88	900.243	834.558	638.285	1463.37	1150.24	1145.78	1372.67	692.992	984.433	967.914	570.759	2056.01	555.446	979.399	3662.1	85.5289	1679.89	17.6966	1.88302	16.8459	1091.12	718.009	2558.45	374.501	258.593	824.466	1810.8	844.479	3924.63	801.253	602.084	250.828	871.526	1601.33	874.997
2700050L05Rik	976.001	1332.72	1050.15	1060.39	1615.98	3520.42	466.017	808.961	718.413	1873.82	969.008	706.587	836.653	1910.85	1397.82	579.738	43.0589	486.795	523.904	1187.94	417.77	971.87	2013.24	821.579	847.792	2563.11	424.963	1341.71	1719.99	3658.74	588.747	4042.4	1402.85	926.523	1159.23	880.401	2142.24	1241	1283.89	2613.37	2608.74	4687.29	1191.75	2390.16	630.244	2476.26	147.895	956.588	768.151
2700054A10Rik	116.76	130.389	72.2095	14.7733	0.515587	0	66.9643	201.781	78.9604	98.8097	546.966	0	0	0	0	3.78914	0	0	29.7368	28.796	0	3.39196	0	0	0	0	374.338	31.4334	0	0	0	0	0	0	87.1428	96.0546	244.828	169.503	272.203	0.626256	0	0	0	0	0	0	0	56.5795	299.214
2700060E02Rik	13849.4	12042.9	16641.2	23985	11205.4	12341.7	6280.97	10775.9	13122.3	14278.5	9968.96	12603.2	16328.5	22070.4	15091.3	17099.4	31531.8	11996.7	14577.4	15461.9	9396.2	15006.3	11762.2	16752.3	11759	11299.8	14687.6	29064.3	13102.1	13988.7	6658.73	11406.7	20511.7	13409.3	21309.2	19482.6	19084.3	16311.6	9635.99	14034.1	14701.3	12466.7	15023.7	23794.9	13632	26235.5	14525.4	12693.5	14361.4
2700062C07Rik	2902.84	610.857	1723.83	1332.88	2701.07	1325.99	1797.56	2074.66	752.224	2190.28	740.768	1345.88	2991.58	535.774	994.677	5.68371	2953.33	1221.47	663.089	2384.84	379.924	1094.57	1663.08	919.654	1370.36	3627.03	2602.54	2405.48	953.968	9.50321	27.4749	3246.06	2297.28	640.143	1737.29	1955.91	1750.52	1483.42	1905.42	206.978	5.96966	848.744	33.5029	2899.57	535.037	69.3778	385.584	1823.7	2043.27
2700078E11Rik	1069.24	981.43	1559.4	1747	1830.93	2079.26	1840.38	2500.02	1450.48	1623.24	1270.18	946.923	1731.37	1105.94	1987.92	1519.44	1464	4157.17	1389.58	1360.3	1349.38	2639.39	1328.99	1764.97	2356.8	2175.72	1205.01	823.887	264.833	636.715	1098.99	3733.97	8430.28	0	1460.73	1949.31	569.224	2442.93	2676.66	1405.32	4041.46	2853.32	3603.96	3852.5	2085.17	1376.88	4399.89	1070.19	891.486
2700081L22Rik	2.49684	5.8263	0.540895	15.2423	64.1476	0	26.8768	23.1552	0	24.0348	62.1245	0	0	0	0	0	0	0	1.44554	28.796	0	5.45663	8.92621	0	0.538451	0	0	3.30878	0	0	0	0	0	0	31.6073	9.30529	0	9.63082	4.53672	0	0	0	0	0	0	0	0	27.1932	8.13439
2700081O15Rik	928.692	1242.31	948.19	124.049	220.886	93.3798	752.095	87.5977	271.531	494.494	507.125	81.7142	1126.01	722.174	1513.83	918.866	0	128.418	1192.57	1611.74	0	97.0395	160.162	2.33514	47.9222	711.531	1058.84	172.057	5.69533	0	765.371	50.5616	88.502	0	120.308	12.9073	0	14.3087	521.723	621.246	306.442	0	593.48	66.9454	1585	85.3881	0	1065.36	1051.32
2700086A05Rik	0.197119	15.1685	15.9564	38.4575	0	0	0	0	0	0	0	0	0	133.071	14.8602	101.359	0	0	451.834	58.7537	0	2.94953	0.510069	1.94595	0	0	0	0	0	0	0	0	0	0	2423.41	6038.54	1248.62	258.106	1379.16	46.343	0	290.023	0	0	0	0	0	157.458	58.6995
2700089E24Rik	15989.1	16787.1	7734.81	9530.42	10518.4	11709.8	18368.2	15999.7	23113.1	24981.1	21394.5	19750.8	14132.7	10177.7	12360.4	17255.7	2350.51	6286.53	17534.2	11282.6	3773.03	4597.14	2178.25	3792.26	7961.27	16446.9	14427.3	26873.9	14870.5	4209.92	17167.9	36745.7	8998.95	4632.61	13870.2	19202.5	17768.4	10472.6	12367.1	10201.7	1359.09	7856.22	4881.86	12624.4	14222.1	2855.16	2773.04	13496.2	13243.5
2700090O03Rik	22.2087	4.82176	30.831	21.5737	0	0	0	6.0032	0.210001	3200.19	0	0	1.90365	0	0	0	0	0	0	39.0032	0	1.03234	0	0	0	0	0	4.96317	0	0	0	0	0	0	1.00164	31.2178	6.12069	0.275166	0	0	0	0	0	0	0	0	0	0	0
2700094K13Rik	1760.53	1632.77	2805.9	2750.41	1311.35	3290.08	559.858	1802.67	2722.87	4842.57	2435.69	1716	945.161	505.372	1275.1	556.056	4817.53	2096.5	1673.52	1874.48	2256.25	2273.35	3683.97	3017.39	2317.76	1678.45	2466.35	2769.45	766.022	1197.4	3455.94	364.044	1223.96	2375.27	4589.41	2428.98	2136.12	445.219	1356.48	678.862	2019.73	1885.15	3771.47	1278.24	2388.22	3180.71	3375.18	1189.92	2026.56
2700097O09Rik	1113.72	498.852	582.544	1452.24	1065.8	127.619	1021.77	2499.9	651.843	1345.06	2715.25	2989.78	861.4	3041.21	1155.26	239.663	3201.55	2454.88	1444.3	1011.68	0	482.838	913.279	1187.81	1181.36	540.248	755.806	3012.65	1429.53	0	539.685	68.2582	2387.67	5053.76	1393.84	1074.61	146.897	1483.7	866.513	1883.47	592.986	1053.47	2804.67	2286.6	225.279	0	10.564	1397.82	1201.91
2700099C18Rik	28.1223	144.05	134.413	117.717	22.2991	255.238	56.9424	81.8395	109.411	786.917	230.941	0	0	275.612	102.104	452.802	1162.59	0	69.7989	64.8946	49.492	143.347	146.39	220.281	67.3064	40.5186	0	0	0	0	0	0	0	0	561.587	48.3275	67.3276	28.3421	13.6102	38.2016	272.614	157.807	0	35.5648	30.8417	0	0	0.877201	105.088
2810001G20Rik	881.121	584.538	747.247	359.718	464.587	803.067	2437.59	462.369	1183.99	3192.62	2148.02	1653.51	1222.14	699.746	833.132	622.366	656.015	274.756	1016.21	772.926	1563.36	273.716	485.841	1952.56	161.266	1392.37	1237.81	903.297	310.395	0	739.859	257.864	3.76604	1937.28	1301.35	997.768	869.138	323.596	730.412	733.659	734.268	5160.71	38.2891	672.592	438.489	0	126.767	785.972	1758.35
2810002D19Rik	2355.57	1685.01	1893.4	608.754	2077.08	1873.82	1368.9	1503.25	1514.32	1456.78	2110.88	874.822	2310.08	1186.18	1712.76	1916.36	2730.44	307.607	1556.43	1733.9	994.206	1270.8	843.909	585.73	1180.82	2381.39	1411.79	1376.45	4579.04	1691.57	0	2224.71	346.476	3183.87	578.281	398.627	367.242	249.851	353.864	308.118	0	430.77	660.486	559.622	860.887	1915.9	2366.33	2197.83	2059.76
2810002N01Rik	4117.75	3982.78	3838.46	3120.22	1872.27	2960.14	3871.17	3886.52	4576.76	2220.55	1819.84	3071.49	4102.36	2957.47	4647.9	2030.03	2132.68	2063.65	4378.54	3660.99	422.137	3398.89	1663.08	2837.97	2716.76	2640.46	4683.14	3442.79	2796.41	2261.76	3071.3	1499.15	8066.86	3503.94	3246.32	2838.11	1260.86	1813.9	1243.06	1877.83	1866.51	2998.33	3182.78	3171.54	2165.63	3901.17	6618.32	3278.1	5267.13
2810004N23Rik	1259.26	728.589	852.451	1699.16	1303.79	936.911	1355.23	1242.29	1419.61	1446.98	1430.22	2667.73	962.294	2186.46	722.399	101.359	3546.03	322.539	790.297	1258.72	1266.41	1042.81	2066.29	1020.45	1057.79	1067.6	1194.32	6486.87	2859.06	807.773	961.62	3339.59	2530.78	168.459	3401.13	1662.35	8195.61	919.606	1687.66	1107.85	1406.85	1151.56	382.891	2988.49	533.696	645.748	813.425	778.078	1157.5
2810006K23Rik	1550.4	1221.51	1144.26	390.437	3057.64	2076.14	818.148	969.332	1850.53	1548.91	1486.26	4172.23	432.128	1932.78	1249.7	862.976	681.343	238.918	1502.74	1349.76	2732.25	839.584	825.547	539.416	975.943	2631.25	1289.86	2122.58	822.975	845.786	1840.82	1150.28	173.238	0	1162.24	957.845	0	698.923	1760.25	357.592	0	0	201.018	2807.52	394.238	1110.05	3031.86	1304.4	1394.06
2810008D09Rik	885.589	1980.84	317.506	862.479	4426.31	1354.01	6148.87	1287.38	1173.07	3254.93	2981.3	3105.14	676.747	1346.16	480.321	648.89	3077.44	2320.49	757.462	229.538	532.766	322.531	1072.93	1026.68	1137.48	1716.51	3495.96	714.697	1176.09	703.238	686.871	894.941	502.766	589.605	1406.75	551.114	9585.01	1154.87	6823.23	2092.64	1806.82	2371.37	760.995	402.719	985.595	1222.12	1753.62	1780.28	3187.14
2810008M24Rik	7280.06	6824.9	6926.98	9694.57	7360.52	6296.91	8564.59	14603.9	4478.48	4476.7	8751.46	4350.08	5715.7	5130.97	4026.64	7367.98	4164.05	3733.09	6078.49	5240.28	4353.84	4206.62	4098.41	4762.51	9182.75	5691.02	7009.74	1981.96	7836.77	8714.44	7357.37	24004.1	5242.33	9939.06	7797.44	7435.23	1695.43	19476	3983.24	3873.71	1699.36	3109.22	8203.43	2349.37	8254.86	8634.87	5884.12	6436.46	5989.99
2810013P06Rik	1984.99	2937.96	1343.58	1447.55	4569.26	1926.74	5051.47	4461.35	5290.76	5353.53	9602.29	1499.7	4414.56	1499.67	1261.2	4582.96	5790.15	2550.45	9126.3	1362.62	3588.17	4090.11	5228.21	5103.83	4121.85	5587.88	2397.9	2024.97	1993.37	12895.9	1989.96	1860.67	907.616	14706.4	6740.04	4878.68	10399.1	8011.2	17275.8	1293.53	2236.63	10202	3757.11	1059.62	3275.93	3885.16	1626.85	3573.72	3592.54
2810021B07Rik	1851.54	2528.51	2034.85	1868.94	3079.34	3230.94	2048.1	1573.82	2051.5	1564.04	2220.95	3114.75	1109.83	2048.4	1304.82	1208.73	4850.46	1323.01	2380.8	1932.65	1614.31	2089.74	3077.76	1870.05	2074.92	1569.79	1566.51	531.059	785.955	598.702	1670.08	702.806	2777.46	1785.66	2813.39	3131.08	2209.57	1955.88	3044.14	2567.96	2371.94	1032.14	3417.3	2038.7	2679.21	1563.67	3544.21	2943.89	2802.41
2810021J22Rik	617.113	122.654	115.211	137.181	720.618	6.22532	945.699	593.704	98.7005	1333.04	838.681	4580.8	72.3386	1.99358	114.568	0	1504.53	0	83.0152	694.422	0	95.8597	0.510069	388.8	377.724	187.245	0	1728.84	0	19.0064	178.587	2.52808	611.982	202.15	537.213	215.222	410.086	342.307	898.27	252.381	0	0	47.8613	307.531	0	256.164	0	457.46	103.549
2810025M15Rik	1171.08	19564.5	1769	1301.46	5937.54	5811.34	1345.21	3052.56	12117.7	2033.17	2823.97	3484.87	4634.43	827.834	1815.82	9665.14	245.689	2410.08	19350	1203.04	0	1886.81	477.17	68.4973	2900.91	6047.09	7115.98	4048.29	5478.91	2689.41	8434.78	391.852	4647.29	84.2294	2013.74	1249.61	7387.68	193.717	10448.1	1849.65	17.909	0	2431.36	913.177	19139.3	1798.49	945.474	1623.7	18043.4
2810029C07Rik	77.2048	89.1022	116.563	87.9363	87.3919	0	1322.89	73.0185	983.435	1692.67	1170.24	76.9075	1.90365	0	0	0	0	0	17.7595	65.1436	0	21.0891	0.255035	0	0.269226	0	198.934	0	0	0	1261.88	40.4493	692.951	0	126.541	90.3514	0	61.3621	1524.34	0	0	0	0	8.36818	399.602	0	0	243.862	253.925
2810030E01Rik	581.04	588.155	107.909	26.7326	27.6698	0	1154.79	70.3231	317.101	997.444	497.672	870.016	1.90365	0	0	0	0	0	322.355	185.307	0	0.884859	0	23.7406	2.42303	47.8856	389.311	76.102	0	0	1291.32	126.404	999.884	0	80.6877	42.3241	587.587	85.8519	49.9039	0	0	0	0	35.5648	17.4323	0	0	53.5093	268.655
2810046L04Rik	619.413	892.528	410.81	659.171	1184.17	4809.06	2320.06	860.907	1032.15	1472.35	1306.64	711.394	842.364	289.567	541.2	1910.67	1375.35	1890.44	1168.41	734.172	1969.49	1536.26	2302.2	1672.74	1017.4	1884.73	896.985	952.929	133.84	0	1434.58	214.887	229.728	8793.54	1292.56	992.665	1009.91	1203.85	2871.74	1016.73	2487.36	631.227	813.643	479.078	2541.09	64.0411	1156.75	964.483	1287.43
2810047C21Rik1	217.028	132.498	134.142	259.588	137.919	0	207.27	4.53303	29.8201	21.8094	211.359	187.462	0	0	33.076	0	0	0	3.7171	124.976	0	14.8951	0	0	67.0372	109.277	299.47	1.65439	207.88	0	0	0	0	0	38.9527	73.2417	0	22.0133	0	0.626256	1.98989	0	0	67.9914	0	0	0	0	0
2810055F11Rik	6239.66	342.245	4631.15	926.497	312.66	0	1179.39	138.441	962.224	1110.5	585.456	0	118.978	866.709	3671.44	1028.75	12.6644	624.173	534.849	5102.69	458.529	32.1499	3.06041	3.11351	469.26	1912.35	449.918	2461.73	1264.36	9.50321	1118.62	37.9212	7213.85	0	658.857	1139.15	0	26.416	430.988	1585.37	3.97977	0	0	8363.99	0	0	0	4592.59	151.915
2810055G20Rik	602.001	40.3823	623.923	41.9749	970.635	504.251	3578.72	278.842	27.0901	393.904	634.751	2691.76	73.2904	716.193	810.602	55.8898	0	2018.86	6.19517	668.199	4.36694	205.877	1.53021	0.778379	247.149	203.821	1322.66	2102.73	0	161.555	284.561	0	1169.36	825.448	32.8316	0.600342	0	21.463	9.07344	934.374	0	0	0	150.627	119.344	0	0	757.463	57.3805
2810403A07Rik	3675.21	5606.81	2485.69	7446.68	4671	3788.11	5449.61	2578.07	4128.83	4946.27	5209.01	5979.55	2481.4	7362.29	3280.76	8564.4	3254.74	3544.94	4921.23	2949.72	4818.19	2716.81	6547.5	6701.06	3474.63	3199.12	6912.77	4053.26	3072.63	5549.88	9694.7	2512.91	655.291	10478.1	3199.13	3774.35	6800.09	4415.6	6292.43	13734.7	4789.65	6657.74	3962.92	3352.5	3187.43	581.706	3327.65	3625.47	5539.96
2810403D21Rik	175.304	225.819	351.312	381.995	357.516	31.1266	471.027	202.638	110.461	109.047	278.21	379.731	72.3386	384.262	196.539	12.3147	126.644	271.769	200.31	291.528	52.4033	250.12	87.2218	307.46	235.842	52.7969	42.7815	259.739	290.462	0	1016.57	816.57	26.3623	623.297	359.478	393.224	12.2414	214.079	195.079	151.554	600.945	119.421	555.191	190.376	18.7732	256.164	0	171.931	177.638
2810405F15Rik	9.79023	0	8.92478	0	0	0	85.6414	0.245028	0	88.5727	4.0516	0	0	0	0	0	0	0	0	18.4228	0	0.147476	0	0	0	0	59.181	0	0	0	0	0	0	0	0.111293	0	6.12069	1.10067	0	0	0	0	0	0	0	0	0	0	0
2810405K02Rik	3967.15	1307.8	3817.91	2171.91	4037.04	5668.16	3297.19	7741.43	1750.15	8209.22	5233.99	7599.42	1950.29	1863.5	1535.88	155.355	851.046	8024.66	742.594	2024.6	11.6452	5531.84	301.961	725.838	6518.49	1440.86	1636.39	23293.8	7102.08	4048.37	679.021	156.741	4796.05	589.605	4227.37	813.763	24.4828	5505.53	3035.07	1703.42	0	699.468	14.3584	8567.97	1210.87	2689.73	876.808	2168	1460.67
2810407C02Rik	6028.09	8935.53	5563.38	8584.46	6819.97	6290.69	17470.8	16925.8	7193.58	8048.99	14448	30267.9	6789.36	2365.88	6529.4	7299.77	6532.29	3386.66	7330.95	4738.72	6179.22	7201.72	10732.6	6676.93	9125.94	6986.38	8144.17	7148.62	10826.8	24062.1	6486.03	11406.7	27258.6	8827.24	4941.43	5052.17	4339.57	8114.11	5807	6688.42	11991	11285.3	4977.58	7480.11	11391.3	12957.6	8805.06	6933.84	6885.43
2810408A11Rik	111.372	44.7018	71.3982	243.877	0	0	16.3994	94.2134	39.2702	526.54	361.943	0	0	0	0	0	0	0	140.837	69.7908	0	270.029	7.90607	2.72433	0	0	0	550.912	19.9337	0	0	0	0	0	1158.23	212.821	183.621	587.755	113.418	0	0	0	0	0	0	0	0	0	236.557
2810408I11Rik	39.0295	55.1489	189.584	361.594	2.70683	1114.33	0.455539	43.6151	34.8602	97.4745	141.131	0	75.1941	284.583	127.99	162.933	0	176.202	63.8102	224.808	82.9718	193.194	121.907	121.038	9.69213	44.2021	0	3.30878	0	0	139.337	20.2246	659.057	84.2294	614.117	211.62	263.19	421.555	22.6836	71.0801	0	0	0	889.119	38.8874	0	5.28198	0.877201	27.2612
2810408M09Rik	3064.47	3663.23	957.115	1277.54	5014.47	4292.36	3672.1	4261.04	3140.56	2808.96	4807.22	4883.62	2763.14	2605.61	1345.57	2481.89	1821.14	1463.37	3240.28	1752.49	1301.35	1279.95	1895.67	1488.65	2064.96	2431.73	3433.93	1394.65	2084.49	1339.95	3958.34	1473.87	1442.39	4851.61	2274.17	2661.61	232.586	929.787	1179.55	2149.94	2365.97	725.058	4427.17	976.985	1709.7	3394.18	2456.12	2951.78	2997.63
2810410L24Rik	114.657	543.152	83.0275	85.5914	24.0607	3.11266	558.035	1030.96	282.451	321.354	829.228	273.983	37.1211	91.7047	16.7777	558.898	0	0	262.675	63.9818	0	0	0.765104	2.72433	4.03839	136.29	173.978	0	914.1	0	571.084	346.347	0	0	182.299	88.2502	446.811	169.778	77.1242	12.5251	0	0	0	41.8409	860.887	0	0	59.2111	289.54
2810417H13Rik	217.685	283.982	125.217	311.646	236.225	3691.62	196.337	143.464	5.25002	4118.41	240.395	245.143	66.6277	6.97753	102.104	56.8371	1562.78	229.958	68.5598	181.738	141.198	1689.93	359.599	1312.35	452.568	422.375	56.3289	8.27195	0	9.50321	129.524	40.4493	41.4264	2088.89	6639.54	203.216	189.741	107.04	1302.04	252.381	9.94943	405.18	3800.19	5.23011	211.869	448.288	1119.78	22.3686	1.75879
2810422J05Rik	6536.33	4268.06	5897.38	8281.73	7181.52	8877.31	6685.95	6839.6	5753.82	2951.83	4838.29	11238.1	8134.28	11240.8	6061.54	4216.36	15265.6	9619.43	7165.12	8209.25	6499.46	12665.1	12372.2	9737.91	9206.44	3286.3	6680.33	21361.5	7290.02	10643.6	4739.41	19683.6	13789.4	2122.58	11572.6	8775.79	3146.04	10818.2	3987.78	5759.05	3890.23	4222.4	6834.6	13964.4	5963.18	6708.3	4769.63	4466.27	7412.63
2810422O20Rik	807.07	676.051	72.2095	371.443	1551.79	3.11266	322.522	292.319	584.223	790.923	1209.4	562.386	790.965	212.815	65.6727	0	759.863	2.98647	1072.38	447.458	131.008	299.377	1973.46	720.39	528.759	535.336	1451	269.666	495.494	1007.34	1252.07	5.05616	269.272	0	609.888	542.709	18.3621	254.529	861.977	92.9991	1532.21	678.143	2225.55	3164.22	856.864	37.3573	2350.48	1677.65	1056.15
2810428I15Rik	6285.46	4395.54	5935.25	3791.58	2892.23	5356.89	7282.25	7932.43	4520.9	5403.82	7001.84	7484.06	12354.7	3397.06	5583.61	2891.11	4759.27	8881.77	4460.11	6230.3	5793.47	5849.95	2944.12	3408.13	5402.82	5916.94	3861.03	12290.5	10035.2	7574.06	2961.4	6573.01	5647.18	758.064	9479.53	5800.8	10466.4	10794.5	6986.55	2063.51	2043.61	1445.85	6557	10747.9	4421.1	5235.36	2392.74	5306.19	5935.47
2810432D09Rik	5438.7	2635.19	1889.89	2162.3	3920.48	1811.57	3871.63	2937.77	3264.89	3620.35	5198.2	3499.29	3075.34	1225.55	1802.88	1839.63	2836.82	2640.04	3092.01	2973.53	2949.14	1667.81	5336.34	2519.22	2374.03	2668.7	3022.51	6771.42	1432.38	2537.36	663.321	9055.58	15533	12011.1	4380.73	7405.51	2344.23	2615.73	3434.3	1968.95	6751.68	2324.45	2933.9	6063.79	5956.48	3041.95	1875.1	5020.22	4666.06
2810432L12Rik	5729.39	2903.3	1166.17	6792.2	24.5333	423.322	25291.1	9903.56	3929.54	12711.3	24025.3	11925.5	14674.3	3080.58	1316.81	1027.8	0	47.7836	2911.31	2226.91	0	48.8147	2.29531	1.94595	2266.88	8432.16	4591.16	12953.9	12096.9	0	647.622	9245.19	1645.76	690.681	7256.22	5083.69	8165	12412.8	6864.06	1775.12	9.94943	0	62.2197	9.4142	3467.68	10.6735	5.28198	3149.59	5999.89
2810433D01Rik	386.024	0.100453	794.035	14.5388	0	0	0	0	33.3902	0	74.9546	0	0	0	0	0	0	0	0	303.395	0	17.5497	0.255035	0	0.807677	0	0	0	0	0	0	0	0	0	0.556467	0	0	3.02683	0	0	0	0	0	0	0	0	0	295.617	0
2810442I21Rik	4.2052	3.41542	25.1516	52.7618	20.8813	345.505	27.3323	1.47017	0.420002	112.607	16.2064	0	232.245	693.267	2322.51	33.155	0	430.052	27.2587	2477.28	0	419.128	0	11.2865	12.3844	34.3794	0	69.4844	0	0	0	0	0	0	712.501	127.873	0	9.08049	9.07344	101.454	0	0	0	0	0	0	0	0.877201	0.659545
2810442N19Rik	54.7333	52.9389	22.1767	0	62.0423	0	14.5773	418.754	166.321	107.712	301.169	96.1343	0	0	3.35554	1.89457	0	0	17.3465	26.3064	0	45.1278	0	0	0.538451	0	37.0773	0	0	0	0	0	0	0	16.2488	107.161	12.2414	13.4832	0	20.9796	0	0	0	71.1295	0	0	0	199.125	111.683
2810453I06Rik	8139.89	3815.02	5197.46	8160.02	3333.61	5092.31	2961.46	5195.34	4374.53	5903.66	6458.25	2004.4	6541.88	3758.4	7180.85	4796.1	1144.86	979.563	3867.44	6306.4	3774.49	2106.26	3395.28	3345.08	2444.03	7799.82	3880.28	9924.69	4109.18	3212.09	6431.08	2573.59	557.374	3672.4	1278.76	990.864	269.31	678.285	1333.8	4519.69	4150.9	1262.45	2680.23	1446.65	1703	2017.29	2767.76	4782.5	2059.98
2810454H06Rik	269.067	322.958	202.836	122.642	568.305	43.5773	126.64	283.375	300.301	364.973	324.128	764.268	164.665	361.336	126.552	393.123	962.493	29.8647	985.651	415.757	93.1614	178.741	138.484	243.633	373.685	84.7206	47.7726	95.9547	834.366	1615.55	1016.57	2.52808	58.3736	0	809.215	521.096	3188.88	796.332	2490.66	135.271	9.94943	63.9757	14.3584	47.071	109.957	106.735	10.564	565.356	410.457
2810468N07Rik	3603.73	5.12312	2243.09	23.2152	610.326	3.11266	7855.77	83827.5	72.8703	3108.5	43572.9	2268.77	709.109	2022.98	1827.33	101.359	2.53288	683.903	116.882	2772.21	0	174.465	203.263	3.11351	427.261	3048.71	102.676	234.923	1711.45	9.50321	1.96249	35.3931	22.5962	0	7.45666	22.813	1273.1	9.08049	4.53672	501.631	222.867	0	9.57227	11.5062	9.38661	5.33676	15.8459	723.252	572.925
2810474O19Rik	12987	7743.75	7349.96	8549.99	18115.5	11625.8	4513.94	2623.76	4551.35	3710.71	3595.8	8546.34	13792.9	17864.5	4742.81	12980.6	26091.1	19310.5	8610.45	12663.3	14019.3	34712	16903.4	18524.2	15680.5	9697.44	13715	3965.57	6563.87	19282	22445	2621.62	2899.85	34315	7589.77	3909.42	4902.68	13841.4	6700.73	14993.2	14116.2	23236	21274.4	2670.49	13414.8	27495	19818	18398	9356.09
2900002K06Rik	93.2372	148.571	117.104	64.0176	122.452	0	13.2106	277.617	25.2001	57.4165	257.277	0	90.4232	173.94	78.1361	71.0463	0	80.6348	189.779	113.109	75.6936	188.18	320.323	117.146	36.3455	29.468	0	0	0	1197.4	206.061	0	0	0	145.461	137.478	783.449	66.5903	326.644	14.0908	59.6966	140.747	0	69.0375	253.439	0	1743.05	87.2815	102.449
2900005J15Rik	847.808	139.028	159.564	348.228	2092.34	2334.5	612.245	3.67543	186.901	747.304	865.017	4.80672	1.90365	576.144	226.738	0.947284	838.382	319.553	204.234	312.44	0	176.087	62.7385	1095.18	859.907	0	1008.22	0	0	0	0	0	0	0	573.161	531.602	0	186.838	362.938	209.17	0	0	0	301.254	0	0	808.143	2077.21	181.595
2900006K08Rik	28.9765	56.9571	31.9128	192.522	17.6159	0	384.019	113.938	10.9201	274.62	16.2064	1177.65	227.486	36.8812	34.0347	0	0	2.98647	14.0424	37.6754	2.91129	9.88092	76.5104	67.7189	6.99987	3.06959	3.56512	325.915	2.84766	0	23.5499	53.0897	148.759	0	106.953	180.102	373.362	32.1945	113.418	0	0	0	19.1445	17.7824	26.8189	0	5.28198	30.2634	0
2900008C10Rik	178.13	108.49	153.885	73.163	374.617	0	30.5211	77.3065	12.8101	210.082	119.522	0	181.798	173.441	140.453	114.621	0	277.742	42.3336	110.371	323.153	258.379	152.001	259.2	258.457	236.972	490.561	904.952	111.059	0	0	0	0	0	70.1149	439.75	716.121	100.161	254.056	234.533	0	208.987	81.3643	994.767	128.731	26.6838	100.358	103.51	153.894
2900009J06Rik	9.59311	3.51587	14.0633	22.0427	0	0	28.699	6.86079	58.8003	157.116	5.40213	33.647	34.2657	0	0	0	0	0	19.618	29.0449	0	0.442429	0	0	0	17.1897	14.9735	29.779	242.051	0	0	0	0	0	32.4977	14.4082	0	9.08049	0	0	0	0	0	151.673	69.7291	58.7043	0	2.193	0.219848
2900010M23Rik	3756.03	3815.62	3115.29	3644.78	2029.61	3573.33	5502	3917.27	6462.78	8662.32	4901.09	4441.41	3004.91	1807.68	6256.64	2401.37	3485.24	5510.04	3221.69	5462.85	2256.25	4086.13	1563.11	2148.71	2950.71	1458.67	1903.78	22704.9	1161.85	2537.36	4813.99	9027.78	5490.89	859.139	6320.8	4042.4	35291.9	7855.18	3792.7	1931.37	2369.95	1117.44	2795.1	9056.46	3427.46	5043.24	2017.72	2163.18	3570.12
2900026A02Rik	1021.73	6910.59	401.885	2269.93	342.478	46.6899	281.068	108.058	7698.43	968.958	10.8043	5244.13	26412.2	284.085	1209.43	15071.3	2.53288	20.9053	9264.46	1121.96	963.638	142.905	87.4769	109.751	101.767	739.157	4589.03	1181.23	7691.54	47.5161	4872.86	927.806	1387.79	50.5376	1884.53	2453	924.225	14421.7	3534.1	258.957	51.737	0	95.7227	4403.75	1173.33	0	0	414.039	5698.69
2900041M22Rik	710.613	127.174	36.24	8.67638	0	0	0.911078	20.2148	64.6803	7.12142	0	0	19.9883	0	563.73	118.411	0	0	575.324	469.781	0	0	110.175	0	36.3455	136.29	0	14.8895	1130.52	0	0	0	0	0	34.8348	8.40478	0	2.4765	0	1.25251	0	0	0	0	0	0	0	359.653	1129.14
2900053A13Rik	1124.63	1539.95	821.35	1247.05	1142.11	1687.06	1857.69	2107	1291.3	1584.07	1077.73	1076.7	568.239	595.083	814.437	849.714	3381.39	3088.01	2553.23	1075.66	1125.21	2915.61	1450.89	1326.36	1633.66	757.574	1038.16	1328.48	649.268	2917.49	889.008	4621.33	2551.49	1650.9	2462.7	3299.78	8238.45	6309.84	5212.69	339.118	813.863	486.215	895.007	3316.94	1288.65	2604.34	966.602	618.427	1938.84
2900056M20Rik	1908.64	705.585	739.134	563.965	1429.08	4606.74	2833.91	722.589	570.573	4632.04	1993.39	1768.87	1396.33	609.537	1119.31	916.024	1177.79	277.742	1005.89	1310.09	1149.96	798.29	988.769	1109.97	932.598	986.566	1530.15	129.042	1355.49	1853.13	1593.54	1425.84	1538.43	0	344.008	221.826	67.3276	123.55	1097.89	656.943	1771	85.301	1258.75	262.552	308.417	160.103	993.012	1408.35	924.463
2900057B20Rik	39.4895	0	70.046	16.6493	0	0	0	0	0	0	0	0	0	0	0	0	0	0	0	53.3596	0	0.147476	0	0	0.269226	0	0	0	0	0	0	0	0	0	0	0	0	0	0	0	0	0	0	0	0	0	0	0	0
2900060B14Rik	80.3587	86.9926	510.605	645.57	303.981	102.718	13.2106	108.303	420.422	167.799	3.37633	0	59.9649	238.233	565.168	891.395	10.1315	1767.99	607.746	209.87	126.641	228.294	175.974	244.411	105.267	168.213	81.9978	14.8895	25.629	9.50321	76.5371	0	33.8944	0	1410.42	472.469	4878.19	1387.39	3865.28	301.856	37.8078	870.07	923.724	38.7028	316.463	10.6735	507.07	155.265	193.467
2900064A13Rik	18194.3	17273.3	17268.1	14361.5	20350.1	14825.6	40899.7	32559.9	13106	15307.9	22133.2	32873.1	15184.4	20214.4	22714.6	13127.5	18011.3	19119.4	13184.6	18877.6	13399.2	10354.3	8655.36	8915.16	11038.5	17888.3	17531.1	13774.5	12848.7	4152.9	22462.7	28400.5	16312.6	791.756	8385.29	13600.1	7124.49	6096.59	12058.6	14351	13911.3	8636.72	5925.23	18488.4	24170.5	13694.1	13506	22613.8	22395.5
2900076A07Rik	377.351	182.825	218.792	49.4788	392.662	227.224	1112.43	736.188	353.012	540.783	736.716	894.049	613.926	198.86	157.231	280.396	93.7164	11.9459	134.229	269.454	1136.86	145.412	427.948	450.292	233.688	730.562	794.309	1700.71	412.911	570.193	202.136	27.8089	1212.67	2240.5	304.276	787.048	257.069	413.025	22.6836	182.554	73.6258	921.25	9.57227	403.765	155.55	0	95.0756	467.548	298.334
2900092E17Rik	3803.47	4480.42	3383.57	1104.25	6921.58	5509.41	2771.96	5287.59	4953.5	3795.72	3327.04	6421.77	3695.93	1807.68	2294.23	1079.9	2140.28	3768.93	4933.21	2764	280.94	4062.24	5300.64	2876.5	3854.5	5950.7	5163.01	3477.53	4351.23	2109.71	2890.75	9730.58	3944.93	539.068	3881.8	2757.67	8746.47	4288.19	4387.01	1687.13	7607.33	1748.67	4685.62	5631.78	4784.49	3628.99	4669.27	5432.07	5854.79
2900097C17Rik	19965.4	9475.17	24693.5	17925.2	7267.11	15616.2	21670.9	17124.8	7576.84	36004.1	13961.1	37977.9	14489.6	14158.9	12483.6	5410.89	4928.98	5295.02	6420.67	15574	5436.84	7684.11	3554.16	4354.64	10086.8	10990.4	11009.8	25462.7	19797	3250.1	15484	9932.83	5221.62	6317.2	7050.66	8792.9	17866.3	5163.22	6414.92	15439.7	7044.19	9830.93	4393.67	8854.58	9186.81	6585.56	5889.41	15133	6704.72
3000002C10Rik	185.423	193.473	58.6872	96.1437	555.845	28.014	789.449	192.96	61.5303	455.326	728.613	4.80672	182.75	120.113	63.7552	0	0	5.97295	43.1597	48.2975	0	29.3478	1.78524	136.995	4.57684	1216.78	74.1545	274.629	1252.97	0	0	0	553.608	0	393.534	207.118	0	100.986	31.757	75.777	0	0	0	268.828	99.2299	1013.98	31.6919	123.247	422.329
3010001F23Rik	238.448	0.703174	246.378	0	0	0	129.829	86.3725	13.0201	336.487	584.106	14.4201	80.905	0	265.087	0	0	0	0.826022	143.316	0	0.294953	0	0	0	291.611	139.04	67.83	384.435	0	0	0	0	0	0.111293	1.20068	6.12069	0	90.7344	123.372	0	0	0	0	0	0	0	15.351	29.8994
3010026O09Rik	697.866	238.476	2107.06	1970.48	985.673	298.815	552.569	1456.2	1377.61	1764.78	1204	312.437	1124.1	1440.36	1275.1	3246.34	1223.38	1872.52	2213.74	4025.29	1561.91	4504.08	640.902	505.168	705.371	317.395	982.548	509.552	2238.26	7878.16	2523.76	5.05616	6814.65	252.688	2155.09	2175.04	30.6035	2127.86	2222.99	1702.16	449.714	435.035	650.914	2726.98	710.701	0	0	2443.88	1208.95
3110001D03Rik	1969.94	1979.94	1423.1	758.597	1605.06	3657.38	1946.97	1411.36	2339.41	2607.78	2206.1	2427.39	2837.39	1202.13	1310.1	574.054	3112.9	2156.23	1059.99	1848.17	857.376	3676.15	1986.46	1272.26	4142.85	1519.45	1636.39	4003.63	2753.69	4076.88	290.448	3804.76	1967.76	4043.01	1948.53	1645.24	1781.12	858.244	467.282	1011.09	2517.21	959.636	1512.42	3370.28	2223.29	3495.58	2994.88	2009.67	1927.63
3110001I22Rik	369.795	255.353	1283	553.178	815.143	1058.3	390.397	189.407	593.253	249.695	925.116	0	838.557	2548.29	1214.7	983.281	1919.92	2460.85	563.76	583.637	120.819	1176.57	2188.71	2002.38	451.222	22.101	2.8521	213.416	0	722.244	474.922	2.52808	5.64906	185.305	1175.7	1715.48	104.052	1329.05	1165.94	3092.14	1269.55	1317.9	33.5029	362.97	407.647	1520.98	5.28198	407.899	557.096
3110002H16Rik	2532.65	4004.07	2559.52	4634.13	3345.13	1466.06	2695.88	5352.16	1722.43	3570.95	2690.26	5013.4	2235.83	1653.67	2340.73	4174.68	762.395	3625.58	4348.18	3663.81	6786.22	4182.29	4379.45	6357.41	4409.65	1609.08	2808.6	10444.2	1412.44	7659.59	7.84996	16270.7	2728.5	23820.1	3536.91	4782.62	2001.47	5035	2522.42	1609.79	1369.04	1910.74	3556.1	6805.42	3730.51	1382.22	5561.92	2396.51	4922.63
3110003A17Rik	2480.02	4455.81	4761.77	4005.44	2653.17	3352.34	25.0547	170.662	1779.97	1955.72	781.959	105.748	3494.14	1464.78	3291.78	3328.76	17423.6	13376.4	4316.58	4005.87	13504	8873.51	5778.06	8426.34	6035.77	1719.58	1634.25	3199.59	3291.9	6614.23	1872.22	5281.16	2929.98	3150.18	5143.54	9347.02	1970.86	3535.89	4491.35	1330.48	6166.65	11515.6	9323.39	3085.77	2364.09	7722.29	5281.98	2428.97	4245.05
3110007F17Rik	322.749	377.504	146.312	4.22094	72.7407	267.689	233.236	640.382	384.092	60.087	287.664	9.61343	113.267	340.902	211.878	329.655	0	140.364	238.101	221.654	84.4275	21.0891	20.6578	86.4	167.997	561.121	445.64	177.02	99.6683	0	578.934	0	92.268	0	40.1769	1.50085	0	3.85233	0	317.512	95.5145	0	76.5781	36.6108	360.714	0	0	339.915	495.758
3110009E18Rik	351.463	108.49	167.948	186.191	282.67	267.689	163.083	272.472	55.6503	206.966	374.098	120.168	286.499	246.207	259.814	221.665	225.426	146.337	47.4963	315.511	652.129	215.463	386.887	346.768	229.38	205.662	152.587	130.697	236.356	57.0193	72.6121	27.8089	73.4378	0	213.906	114.365	263.19	116.946	13.6102	135.271	254.705	140.747	670.059	210.25	91.1843	250.828	227.125	567.549	154.553
3110021A11Rik	49.8053	75.1391	248.271	147.733	11.171	0	624.544	30.3835	64.8903	277.29	83.7331	0	0	1162.76	61.3584	866.765	243.156	0	427.466	48.4635	0	4.57177	3.06041	0.778379	16.1535	0	774.345	66.1756	0	0	0	0	0	0	354.247	147.984	0	141.986	471.819	315.633	0	0	0	0	0	0	0	76.7551	178.957
3110021N24Rik	2071.85	1889.43	1536.41	918.29	878.86	385.97	2764.21	1972.23	1936.42	3722.72	2707.14	1220.91	1609.53	3314.33	2041.13	1295.89	10.1315	0	1661.34	1122.38	0	734.58	0	42.0325	290.764	834.928	1711.97	1285.46	469.865	1073.86	1018.53	3253.64	581.853	0	1028.69	470.968	1573.02	1717.31	485.429	4430.45	0	0	38.2891	419.455	665.109	1083.36	887.372	2239.49	1819.03
3110035E14Rik	43.7604	33.0492	6.49075	0.703491	395.412	43.5773	32.7988	248.826	4.20002	808.726	37606.3	19.2269	14.2774	0.498395	2.87617	0	0	8.95942	6.60818	21.6592	0	22.2689	0.255035	0.778379	70.2679	31.3098	0	11.5807	0	142.548	115.787	0	0	0	1.11293	0.600342	36.7242	7.70466	9.07344	0	0	0	0	2.09204	276.235	10.6735	10.564	0.877201	175.219
3110039I08Rik	102.962	37.9714	282.347	0	0	0	237.336	25.3604	76.8604	113.943	0	264.369	0	0	0	0	0	0	26.4327	81.2428	0	0	0	0.389189	0	3.68351	0	0	0	0	0	0	0	0	0	0	0	0	0	0	0	0	0	0	0	0	0	175.879	6.15576
3110040N11Rik	1948.26	1937.44	2350.73	1903.18	1473.68	1232.61	1369.81	1088.29	1404.91	1540.01	1135.8	1105.54	1766.58	497.398	1467.33	882.869	4609.83	2126.37	1563.45	2543.75	1390.14	1793.46	2587.33	2181.02	1559.36	1079.88	1965.1	4003.63	472.712	988.334	1740.73	1415.73	1141.11	2695.34	2935.03	4642.14	2093.28	2570.33	2835.45	803.174	1540.17	840.214	1976.67	5198.73	1074.1	394.92	1283.52	2034.23	2102.63
3110043O21Rik	979.417	1204.24	1141.83	4104.4	3400.81	1749.32	1417.18	1691.8	807.664	3153.45	2947.54	1201.68	2331.97	293.056	820.668	1539.34	1157.52	683.903	1579.97	1451.42	0	3081.23	1007.64	1417.82	2938.87	1168.29	1413.93	7380.24	3189.38	2214.25	1136.28	649.717	619.514	0	577.724	1527.57	24.4828	893.19	1601.46	1595.39	17.909	1949.13	119.653	3161.08	1619.86	2924.54	248.253	1653.09	594.031
3110045C21Rik	336.285	96.4353	211.761	68.0041	10.4406	594.518	166.272	474.13	69.9303	142.428	157.337	658.52	94.2305	496.401	638.511	36.9441	0	0	86.3193	495.091	0	32.8873	72.6849	139.33	3.76916	0	225.316	97.609	2.84766	0	47.0998	0	868.072	0	340.001	413.635	642.673	139.509	1161.4	549.54	0	0	0	771.964	0	0	0	392.986	83.5424
3110052M02Rik	1162.21	206.231	544.952	239.656	1102.84	49.8026	2133.29	1009.88	414.542	2044.29	1027.76	562.386	508.274	84.2287	543.597	19.893	1735.02	453.944	408.261	549.447	730.734	420.603	606.472	572.498	652.603	585.677	1565.09	1249.06	0	85.5289	115.787	169.381	129.928	0	520.186	898.711	0	807.063	435.525	88.3021	1134.23	392.384	1746.94	1510.46	1082.14	555.023	42.2558	1110.54	260.081
3110056K07Rik	520.788	549.179	505.737	499.947	1118.61	603.856	1368.44	550.334	876.544	855.906	1310.02	557.579	1343.02	1012.24	610.708	1487.24	1912.32	746.618	793.601	416.504	531.311	546.548	636.311	1001.38	802.023	1067.6	830.673	433.45	774.565	2328.29	482.772	826.682	1894.32	1347.67	884.56	490.179	1713.79	379.454	657.824	808.497	1104.39	759.178	449.896	112.97	897.092	80.0513	95.0756	844.306	871.479
3110056O03Rik	2947.25	1989.38	2421.05	716.622	3151.78	2427.88	3353.68	9263.67	2412.91	2214.76	15406.2	5455.62	1986.46	728.155	3068.4	689.623	752.264	20.9053	2419.42	3016.02	2742.44	2021.61	588.62	1391.35	1940.04	3627.03	2047.81	1093.55	2836.27	19.0064	2712.16	2538.19	3425.21	0	3232.96	3174.91	2650.26	4083.74	3184.78	1818.02	1024.79	1207.01	0	1855.64	1519.29	2209.42	1896.23	1357.91	2324.9
3110057O12Rik	150.007	437.475	325.619	164.382	351.931	62.2532	697.886	649.57	456.542	384.557	415.964	177.848	288.403	71.2705	276.592	13.262	15.1973	0	104.905	278.416	10.1895	81.5545	279.773	288.389	99.0751	303.889	596.801	6103.05	54.1056	0	0	394.381	382.253	0	354.247	335.291	2142.24	819.996	213.226	80.4739	15.9191	34.1204	0	2786.6	756.293	0	1008.86	380.705	169.283
3110062M04Rik	435.632	1344.57	395.935	305.549	1724.64	526.04	429.573	456.855	729.963	327.14	762.376	639.293	893.762	345.388	235.367	667.836	93.7164	424.079	1076.1	347.045	978.194	648.307	1061.71	115.2	677.372	1305.8	754.38	312.68	478.408	427.644	523.985	30.337	451.925	16.8459	289.808	335.291	171.379	277.918	244.983	118.989	185.059	12.7951	191.445	261.506	1893.41	613.727	1051.11	417.986	1486.62
3110070M22Rik	458.498	186.642	188.773	178.687	125.202	87.1545	129.829	188.672	286.441	195.839	343.711	615.26	571.094	102.171	137.098	0	0	134.391	89.2104	224.393	0	16.9598	14.792	35.8054	51.6913	563.576	305.174	354.04	635.029	0	527.91	0	71.5548	0	125.205	182.804	0	272.69	122.491	17.8483	0	0	0	498.953	4.02283	0	0	60.9655	423.868
3110082I17Rik	1802.39	2127	1629.72	1375.09	1585	2138.4	476.949	449.995	1902.82	798.489	1445.07	62.4873	3278.08	1941.75	1516.7	4262.78	0	301.634	2815.7	1576.56	0	2384.84	271.867	723.114	2119.34	539.634	2630.35	90.9915	390.13	9.50321	2264.71	0	201.483	0	2197.71	1724.48	42.8449	30.8186	2118.65	1063.07	571.097	17.0602	363.746	1013.6	105.935	5358.1	10.564	1553.08	3664.21
3200001D21Rik	17.1493	35.3596	138.469	84.6534	58.605	80.9292	17.3105	101.564	66.7803	64.0928	194.477	0	218.919	0	0	0	0	0	282.5	21.6592	141.198	42.1783	98.6984	15.5676	76.7293	109.891	37.7903	89.3371	85.4299	0	0	0	0	0	63.6598	59.734	201.983	40.9998	136.102	0	0	0	9.57227	276.15	10.7276	0	0	0	59.7988
3200002M19Rik	522.956	905.788	958.737	1395.02	1192.38	538.49	712.919	1733.7	684.393	2203.19	380.175	432.604	610.119	818.364	557.498	69.1518	4204.57	1684.37	1737.12	694.422	2365.42	2444.42	2176.47	1167.96	1943	618.215	207.49	3140.03	612.248	788.766	1532.7	0	1803.93	3773.48	2263.82	1634.73	936.466	1048.66	2508.81	978.839	1778.96	34.1204	1411.91	1937.23	4328.57	4023.91	343.329	210.09	630.086
3230401D17Rik	4909.97	6051.51	8555.34	8371.3	6064.55	7280.51	1868.17	6393.89	4834.43	2374.1	1809.72	2720.6	5988.87	12983.7	7088.81	12232.3	6370.18	10754.3	6715.35	5576.04	11508.3	8684.89	14224.3	7986.55	4711.99	3362.43	3225.01	2734.71	3966.8	10339.5	10055.8	2169.09	1734.26	9282.08	3494.06	5672.33	1475.09	4954.37	7608.08	11954.9	9752.43	9221.03	4810.06	4693.5	4984.29	2273.46	10120.3	4121.97	6958.2
3300002I08Rik	156.249	60.6739	120.079	69.4111	236.525	220.999	276.512	117.491	92.1904	160.232	473.362	0	97.086	89.7111	37.3903	76.73	63.3219	74.6618	123.697	145.805	93.1614	60.9078	129.813	238.184	140.536	260.301	179.682	208.453	304.7	0	0	0	0	0	51.4176	83.1473	55.0862	61.3621	22.6836	69.5144	0	183.397	741.851	137.029	325.85	0	327.483	160.966	42.2109
3632451O06Rik	13474.4	208.742	92544.2	1798.12	6.70263	24.9013	334.821	2764.29	122.641	8166.49	59272.9	9.61343	18.0846	42.862	12924.6	14.2093	0	2.98647	164.791	15075.6	1.45565	2.21215	3.06041	2.33514	2.15381	164.53	19.2517	3151.61	0	0	208.024	2.52808	5792.17	0	1253.61	1602.61	2007.59	119.697	1106.96	340.057	0	0	0	3.13807	1.34094	26.6838	0	10182.6	3.73742
3830403N18Rik	78.3876	48.6194	211.22	0	891.879	56.0279	0	0	225.541	0	0	0	173.232	0	314.941	0	0	0	0	367.294	0	164.731	84.6715	76.2811	36.8839	0	89.1281	373.892	0	0	0	0	0	0	13.6891	257.246	0	0	0	0.313128	0	0	0	0	0	0	0	53.0707	273.711
3830406C13Rik	3598.14	2898.08	3854.69	2678.66	2413.59	1559.44	6798.47	4127.99	3578.42	2324.25	3800.4	8166.61	6615.17	2996.85	3279.32	988.018	2748.17	3270.19	2430.16	3471.86	3938.98	3568.78	1216.51	2394.68	3747.62	4542.99	2993.99	4107.85	4023.75	2347.29	3807.23	16136.7	3099.45	4194.62	3507.75	4654.15	679.397	3065.63	3593.08	911.516	1259.6	55.4456	5949.16	3661.08	1847.82	2620.35	1447.26	2523.27	3098.1
3830408C21Rik	152.767	97.038	124.406	28.1396	78.1114	0	259.657	161.229	263.761	167.799	406.511	177.848	175.136	2.99037	378.696	0	0	0	53.6914	314.266	0	2.35962	327.209	12.8432	30.1533	177.422	89.8411	1877.73	0	0	0	0	0	0	126.207	8.40478	183.621	97.6841	54.4406	86.7365	1.98989	0	0	51.2551	0	0	15.8459	222.371	67.4935
3830431G21Rik	0	0	0	51.3548	0	0	125.729	0	0.210001	16.4683	5.40213	0	29.5065	0	0	0	0	0	0	0	0	0	0	0	0	0	0	0	0	0	0	0	0	0	133.107	456.56	489.655	25.3153	117.955	0	0	0	0	0	0	0	0	0.438601	0
3930402G23Rik	104.21	0.200907	225.824	15.4768	8.72201	6.22532	36.4431	0.122514	0	0	0	682.554	799.532	360.838	262.691	0.947284	0	0	102.22	185.141	0	3.83439	0	0	0	8.59485	0	0	0	0	0	0	0	0	91.1493	87.3497	0	91.0801	0	138.09	0	0	0	268.828	0	0	0	126.756	0.439697
4430402I18Rik	150.139	336.921	51.3851	101.772	101.055	0	532.981	59.7869	299.041	204.741	247.823	134.588	375.97	0.498395	19.1745	1547.86	0	0	548.479	192.858	0	3.68691	122.417	0.778379	4.84606	333.357	65.5983	4448.66	0	0	0	2262.63	1866.07	0	51.5289	129.073	48.9655	233.616	780.316	206.351	13.9292	4.26505	0	1057.53	17.4323	0	0	235.529	95.8539
4632411B12Rik	3194.7	3243.14	4062.13	2527.17	2530.97	1185.92	2535.99	1816.76	3670.4	4161.58	2136.54	6666.92	5826.11	5007.37	4828.62	9409.38	1603.31	2141.3	4437.39	3903.97	3193.69	2658.41	2100.97	2189.97	1992.54	3722.18	4076.36	5629.89	3140.97	6775.79	4119.27	15567.9	2540.19	724.372	3227.51	3333.7	814.052	9251.09	4967.71	5329.44	1623.75	2166.64	1751.72	2651.67	3930.31	3175.37	2234.28	1896.07	2326.22
4632415K11Rik	1066.28	188.651	511.146	502.058	779.051	2110.38	449.617	548.986	294.421	815.403	922.414	2456.23	311.246	14.9518	656.247	426.278	106.381	0	209.19	535.671	404.67	258.674	3.31545	688.865	877.137	801.163	221.038	1025.72	953.968	1587.04	17.6624	1577.52	971.638	0	955.12	1278.73	0	837.331	2091.43	373.875	0	0	0	1668.41	520.287	613.727	0	1102.64	243.592
4632415L05Rik	1659.67	694.836	569.563	104.351	2587.39	1419.37	2348.76	1382.94	1987.45	2966.52	2544.41	2057.27	2331.02	73.264	514.835	536.163	458.45	0	984.825	1011.34	17.4678	628.692	73.705	214.054	693.525	1881.66	1288.44	670.028	1685.82	959.824	2437.41	432.302	743.793	0	1321.05	428.344	85.6897	1345.56	190.542	274.3	413.896	85.301	28.7168	355.648	838.091	85.3881	718.349	1647.38	1329.42
4632427E13Rik	2675.03	2719.37	845.69	1654.14	10065.6	5104.76	4255.19	1263.37	1696.81	2990.55	3732.88	10195	1866.53	6079.42	2206.03	1988.35	1709.69	394.215	1795.15	1157.98	2871.99	904.178	3114.74	2556.2	1598.39	3860.31	2163.32	1035.65	2716.67	1415.98	1448.32	3299.15	295.634	0	1275.09	1425.51	3127.67	2494.66	3094.04	4537.54	3311.17	1377.61	1770.87	359.832	3112.33	1739.78	3834.72	4339.95	2238.5
4632428C04Rik	11.8928	47.9163	10.5475	74.8045	107.844	0	0	0	48.0902	25.3701	0.675267	0	0	0	0	0	0	0	0	14.1075	0	121.963	47.1814	2.72433	107.421	0	74.8676	177.02	0	0	0	0	0	0	112.406	20.1114	459.052	320.569	36.2938	0	0	0	0	138.075	168.959	0	0	28.509	0
4632428N05Rik	3462.46	7873.34	6656.26	314.226	281890	102964	4981.32	298.812	6231.15	62.7575	1763.12	57.6806	317.909	3125.93	4723.64	10769.7	4804.86	21756.5	10231.5	7530.27	14670	46570.7	3053.78	27909.2	61198.5	107.436	1264.91	491.354	59.801	100373	5210.41	123.876	10465.8	235.842	34.2784	15.6089	12.2414	134.006	889.197	1129.77	135.312	10880.1	41486.2	191.422	17449.7	30526.2	1399.72	6342.6	13086.5
4632434I11Rik	31.0791	154.296	137.658	38.223	64.2765	958.7	0	26.0955	23.5201	368.534	94.5374	86.5209	18.0846	0	14.8602	0.947284	0	301.634	69.3859	293.851	247.46	308.816	106.859	644.498	77.8062	53.4108	0	0	0	0	0	0	0	0	527.086	54.6311	122.414	30.8186	458.209	169.089	0	0	0	190.376	0	0	0	525.444	0.879394
4732415M23Rik	45.4687	19.1866	64.637	40.568	16.3699	0	191.782	18.0096	0.210001	183.377	90.4858	499.898	12.3737	0	62.3171	0	0	0	0.413011	60.6624	0	1.62224	0	80.5622	5.38451	0	0	3235.99	8.54299	0	158.962	1660.95	418.031	0	49.5256	19.5111	146.897	26.6911	58.9774	59.1812	0	0	0	26.1506	0	0	0	140.352	12.9711
4732416N19Rik	47.4399	34.4555	17.5791	26.0292	98.6919	0	71.5196	61.5021	26.6701	90.353	141.806	62.4873	77.0977	0	0	0	0	0	25.1937	21.0783	0	20.7942	29.329	15.5676	26.9226	16.5758	126.918	0	125.297	0	0	0	0	0	91.1493	44.1251	550.862	76.2211	0	0	0	0	114.867	20.9204	0	0	15.8459	27.6318	53.8629
4732418C07Rik	12089.6	14868.6	9901.9	9098.95	11574.7	9104.53	14278.4	48818.1	11020.2	4566.61	12181.8	19919	8894.79	14829.7	13653.7	16324.6	3599.22	5784.8	11200.7	10189.2	5691.58	3628.95	5185.11	5698.9	5934.81	11071.4	10139.9	7942.73	7309.96	10292	12153.7	5346.89	3880.9	5340.14	7772.29	13341.7	5820.78	6541.53	8583.47	6608.88	6540.75	1113.18	4977.58	3587.86	16689.4	357.563	2799.45	13085.2	12379
4732471D19Rik	319.201	347.77	473.013	299.452	539.991	451.336	573.524	513.212	871.504	923.559	966.307	504.705	263.655	2237.29	1529.17	588.264	227.959	561.457	509.862	830.684	519.666	569.554	607.492	1316.63	247.149	60.1639	522.647	191.909	0	0	1138.24	91.0109	165.706	2139.43	1008.99	426.843	3721.38	782.848	1578.78	2298.99	786.005	1343.49	416.394	946.65	697.291	0	433.122	1048.69	563.252
4732471J01Rik	109.992	71.7237	183.634	143.747	335.905	317.491	721.118	548.129	557.133	1485.26	941.322	216.302	107.556	59.8074	30.6792	48.3115	0	11.9459	187.92	145.888	0	133.761	7.396	28.0216	113.344	71.2144	225.316	47.9773	0	104.535	194.286	78.3705	619.514	741.218	179.182	60.3343	1897.41	122.999	204.152	210.422	0	358.264	0	163.179	124.708	0	0	375.881	220.508
4732490B19Rik	0	0	5.6794	159.692	0	0	0	0	0	0	0	0	0	0	0	0	0	0	14.4554	1.1618	0	0	6.12083	0	0	0	0	0	0	0	0	0	0	0	273.559	215.222	238.707	64.9393	208.689	0	0	0	0	0	0	0	0	0	0
4732491K20Rik	763.31	317.835	228.799	50.4168	235.666	971.15	453.717	277.985	87.9904	746.859	842.058	326.857	385.489	668.846	261.732	24.6294	0	265.796	96.4381	379.741	0	17.1073	6.88593	0	159.382	299.592	111.232	1086.93	560.99	0	635.847	300.842	1555.37	0	335.327	213.722	238.707	500.253	222.299	31.6259	0	0	157.942	326.359	33.5236	0	274.663	339.915	345.822
4831426I19Rik	311.382	472.432	1257.04	35.409	0.77338	401.533	620.9	613.061	186.691	35.162	0.675267	0	439.743	1481.73	546.473	569.318	1458.94	361.363	885.702	411.525	2965.15	657.303	375.921	573.665	1113.25	251.706	481.292	188.601	0	171.058	361.098	0	1.88302	0	57.0935	126.672	1591.38	330.75	0	823.527	360.169	1023.61	0	91.0039	0	0	792.297	624.567	214.572
4831440E17Rik	316.638	347.77	116.293	130.849	395.67	0	1316.51	266.223	116.131	891.068	72.9288	346.084	372.163	87.7175	123.196	998.438	0	14.9324	642.645	289.121	0	119.014	22.6981	221.449	6.46142	535.336	607.497	1462.48	48.4103	0	68.6871	55.6178	15.0642	0	446.621	218.824	257.069	220.408	1161.4	72.9589	0	4.26505	0	199.79	335.236	266.838	0	809.657	614.916
4833403I15Rik	523.35	2.8127	62.203	0	0	0	0	0	0	0	0	0	0	0.498395	3733.27	57.7843	0	0	8.05371	1940.45	1.45565	0	0.765104	0.389189	4.03839	0	0	0	481.255	0	0	0	0	0	0.667761	0.900512	0	17.8858	0	0	0	0	0	0	0	0	0	628.515	0
4833412C05Rik	81.0815	0	270.718	0	0	0	0	0.245028	209.371	8.90178	0	0	0	0	0	0	0	0	0	36.1817	0	71.5261	0	3.5027	0	13.5062	0	62.8668	0	0	0	0	0	0	0.222587	0	0	0.550333	0	0	0	0	0	0	0	0	0	592.549	20.8856
4833417C18Rik	120.045	296.438	19.2018	54.1688	671.509	277.027	34.621	64.81	141.961	204.296	326.154	0	6.66277	45.3539	128.948	19.893	554.7	0	135.674	73.5251	46.5807	25.366	59.9331	14.7892	152.651	198.909	74.8676	52.9405	908.405	0	0	0	0	0	73.6763	66.3377	306.035	186.288	90.7344	139.029	65.6662	0	100.509	135.983	14.7504	5.33676	132.049	149.124	72.55
4833418N02Rik	168.734	45.8068	519.53	325.247	652.948	21.7886	104.774	101.197	63.8403	61.8674	67.5267	0	644.385	488.427	375.82	0	0	0	142.076	309.868	1.45565	289.644	262.686	5.83784	140.536	26.3985	161.857	216.725	88.2776	209.071	5.88747	298.314	18.8302	0	522.634	807.459	3819.31	437.239	263.13	222.947	113.423	0	0	1516.73	147.504	192.123	544.044	328.073	192.807
4833419F23Rik	356.391	265.699	358.343	13.1318	78.3692	6.22532	0	33.9364	620.973	0.445089	0.675267	0	507.322	82.7335	647.139	228.296	0	869.064	324.007	262.815	0	417.801	238.967	46.3135	478.414	98.8407	161.857	807.343	11.3907	0	0	0	0	0	40.0656	33.9193	391.724	21.463	172.395	133.393	0	0	0	70.0835	126.049	0	0	121.054	430.903
4833420G17Rik	3287.28	4081.42	1886.1	1753.33	5846.07	2309.59	2296.83	2530.65	3698.33	4929.36	3736.93	3811.73	1403.94	3161.32	2337.85	2124.76	4083	3622.59	3012.3	2510.39	4068.53	3066.04	4724.26	3708.2	3178.48	3530.03	3543.02	2066.33	683.44	3155.07	2680.76	250.28	2297.28	7159.5	3617.37	2721.35	6383.88	4025.41	7857.6	1814.58	1854.57	6905.11	1617.71	3269.87	4151.57	3378.17	4748.5	3838.63	3952
4833422C13Rik	73.7881	46.2086	53.8191	10.7869	26.7246	0	147.595	12.7415	18.0601	272.839	1505.85	0	142.774	0	115.047	0	0	0	152.608	69.8737	0	31.1175	0	108.584	0	6028.67	44.2075	0	148.079	0	0	0	0	0	4.11786	0	42.8449	28.6173	281.277	585.236	0	0	0	263.598	0	0	0	171.054	391.99
4833423E24Rik	0	0.401814	0.811343	102.241	0.214828	0	0	0	0	0	0	0	0	0	0.479362	2.84185	0	0	0	0.331942	0	3.09701	0.765104	4.67027	7.80755	0	0	0	0	0	0	0	0	0	9.12606	1.50085	201.983	20.9126	0	1.56564	0	4.26505	0	0	0	0	0	0	0
4833424O15Rik	3.21961	0.30136	1670.29	0.937987	0.343724	0	673.742	606.2	21.4201	2030.5	17645.4	298.016	4.75912	0	0	0	0	0	0	65.0606	0	0	0	0	0	0.613918	634.592	349.076	0	0	0	0	0	0	0.33388	0	0	2.4765	0	0	0	0	0	7.32216	1240.37	5.33676	0	0	0
4833427F10Rik	25.2312	1.5068	50.5737	97.7852	27.9276	0	0	0.122514	59.0103	0	29.7117	0	0	0	0	0	0	782.456	0	3.07046	0	268.407	0	0	114.152	0	0	72.7932	0	0	0	0	0	0	13.2439	12.0068	6.12069	7.97983	4.53672	0	3.97977	0	0	0	0	0	0	0	0
4833439L19Rik	13461.1	20612.6	7736.43	11421.6	15910.7	10704.4	34861	32226.5	20690.1	12614.7	25381.9	23687.5	27255.5	7041.82	11899.2	15570.5	3794.25	4366.22	12134.9	9637.6	4414.97	6240.32	6456.46	5001.47	7812.12	15279.2	10503.6	39639.2	28619	8971.03	16457.4	78360.4	175430	20518.3	10618.5	15306.6	7975.26	28413.7	11954.3	11226.9	3695.22	4452.71	5470.55	16714.4	13641.4	9088.5	4510.81	8175.08	13277.5
4833442J19Rik	5874.47	261.179	2584.67	2231	888.227	376.632	2000.27	785.316	735.213	404.141	430.82	9.61343	2103.53	1783.76	2637.45	1092.22	1279.1	901.915	1001.55	7679.39	343.532	1132.03	1077.52	2996.76	1015.79	3366.11	3011.1	5029.35	3121.04	5027.2	6872.64	2110.95	5801.59	2762.72	6333.15	1882.67	3972.33	2477.87	712.265	2333.74	2288.37	2580.35	1440.63	10780.3	858.205	1915.9	6554.93	6421.11	1423.96
4921506M07Rik	0	0	0	1437.7	0	0	0	0	0	0	0	0	0	0	0	0	0	0	4.13011	0	0	0	0	0	0	0	0	0	0	0	0	0	0	0	215.353	352.4	12.2414	112.818	36.2938	0	0	0	0	40.7949	0	0	0	0	0
4921507L20Rik	4.46803	3.31496	106.286	10.0834	88.552	0	13.6662	15.1918	15.9601	8.90178	0	0	0	0	0	0	0	0	1.65204	4.5642	0	0	6.88593	0	9.15367	1.22784	0	0	0	0	0	0	0	0	10.9068	4.80273	0	7.42949	0	0	0	0	0	26.1506	6.70472	0	0	0	0
4921507P07Rik	65.5748	219.591	2.43403	109.979	82.1072	6.22532	168.094	10.0462	376.532	236.342	2.70107	14.4201	301.728	0	5.75235	0	0	746.618	579.041	30.2067	0	8.40616	129.047	100.022	9.69213	0	746.537	8.27195	0	0	0	0	0	0	234.718	124.271	0	65.2144	2095.96	124.312	0	0	0	56.4852	0	0	0	21.4914	74.0889
4921511C10Rik	530.775	2057.49	807.557	366.753	1254.98	647.434	307.489	646.875	1564.3	375.655	778.583	0	723.386	473.475	647.139	1453.13	172.236	35.8377	738.464	602.972	574.98	219.887	194.081	379.07	637.526	539.02	534.768	18.1983	592.314	9.50321	3071.3	0	0	0	1060.74	462.863	0	1004.36	812.073	1234.35	676.561	1241.13	574.336	39.7488	1633.27	0	0	1634.66	1362.84
4921511I17Rik	7.49051	0.60272	4.05672	10.5524	22.2132	0	0	0	0	0	0	0	0	0	21.0919	5.68371	0	0	0	3.48539	0	4.86672	5.8658	0	4.03839	0	0	0	0	0	0	0	0	0	1.22423	0	0	19.5368	36.2938	16.2827	0	0	0	0	0	0	0	204.388	0
4921513D23Rik	18607.7	18855	9317.19	8068.33	23811.6	15264.5	7161.99	13219.4	10335.8	9020.62	8475.95	8373.3	8330.36	20393.3	16823.2	19986.8	36121.3	14714.4	18834.3	12860.4	17932.1	10600.6	21733.5	12148.9	10016.3	12064.7	20670.6	4243.51	17837.8	24432.8	27841.8	7288.46	4063.56	24645.5	11418.3	21275.2	23797.3	15483.6	6927.57	8761.64	17511	13157.7	5690.71	3387.02	8262.9	2903.2	12544.7	24366.5	36975
4921513I03Rik	53.2221	16.7757	17.3087	0	0	0	0	3.79794	3.78002	0	143.157	0	340.753	60.3058	350.414	733.198	0	0	100.362	46.7208	0	0	0	0	1.0769	154.707	0	24.8159	34.172	0	0	0	0	0	0	0	0	3.85233	0	88.3021	0	0	0	0	513.582	0	0	422.811	205.998
4921515J06Rik	1.90548	56.5553	133.06	40.099	87.6068	0	53.2981	0	4.41002	208.747	176.245	0	1.90365	0	417.045	131.673	0	14.9324	117.708	497.166	0	74.6231	15.5571	78.2271	1.88458	0	0	3.30878	0	0	0	0	0	0	7.45666	191.509	0	25.3153	18.1469	8.14133	0	0	0	0	0	0	0	17.9826	36.9345
4921517L17Rik	241.996	353.094	832.979	330.172	267.031	379.745	315.689	294.157	513.032	323.135	605.714	3484.87	214.16	472.478	587.698	749.302	225.426	179.188	532.784	382.646	691.432	770.27	750.567	581.838	277.302	120.328	309.453	100.918	2.84766	1482.5	365.023	63.202	220.313	623.297	306.28	175	918.104	465.306	408.305	442.45	915.347	17.0602	1723.01	13.5983	400.943	811.187	332.765	467.11	735.393
4921523A10Rik	11.8271	26.6202	135.224	62.6107	114.804	588.293	0	102.789	123.061	12.9076	14.8559	0	79.0014	0	150.999	19.893	0	0	118.328	153.855	0	196.734	0	135.049	0.538451	0	0	0	0	0	0	0	0	0	93.3752	178.902	0	89.4291	1106.96	225.452	0	0	0	23.0125	496.15	0	0	111.843	7.6947
4921524J17Rik	1701.92	2682.71	1668.39	691.297	831.77	1179.7	719.752	885.778	2757.31	2781.81	2247.96	302.823	2428.1	1441.36	1441.92	1904.04	501.509	761.551	2759.33	1553.57	3390.2	914.944	2461.59	2212.93	1096.02	2571.7	3171.53	2339.31	1754.16	2166.73	1568.03	194.662	1005.53	1583.51	1769.68	1152.36	1707.67	938.868	2009.77	1502.08	230.827	2985.53	449.896	1327.4	4104.63	138.756	375.02	1064.92	2789.44
4921530D09Rik	29.5678	0.502267	82.2161	5.39343	9.79615	0	286.534	9.92365	34.4402	137.532	119.522	0	19.0365	0	0	0	0	0	10.7383	10.5392	0	0	0.255035	0	29.3456	6.13918	0	94.3003	0	0	0	0	0	0	28.825	31.8181	30.6035	14.5838	381.084	0	0	0	0	0	0	0	0	19.2984	18.907
4921530L18Rik	13.7983	0	65.4484	197.915	127.522	999.164	326.166	70.0781	61.1103	48.9598	36.4644	0	177.991	80.74	15.819	17.9984	0	161.27	73.516	78.0893	0	147.476	18.1075	0.778379	87.7676	179.878	74.1545	24.8159	0	0	245.311	2391.56	197.717	0	419.465	346.097	208.104	370.099	1120.57	74.8376	0	0	0	593.095	0	10.6735	0	24.5616	21.5452
4921531C22Rik	1155.9	988.16	3641.85	772.667	2659.31	3588.9	589.923	744.029	875.074	1228	704.979	1518.92	1883.66	2743.17	2161.92	3863.03	975.157	3037.24	12189.4	10648.9	312.964	4016.08	1040.54	1747.07	897.329	1183.63	101.962	954.583	1440.92	5283.79	2641.51	32.865	1996	13998.9	4059.65	3469.67	9064.75	5668.7	3175.7	391.41	19.8989	4.26505	2637.16	334.727	560.515	410.93	897.936	1003.52	471.135
4921536K21Rik	11.4329	1.10499	90.0591	78.5564	66.124	0	88.8301	18.8672	3.36002	8.90178	31.7375	14.4201	156.099	0	0	0	0	0	29.7368	35.6008	0	57.5158	0	0	2.96148	0	0	43.0142	0	0	0	0	0	0	510.948	477.272	85.6897	370.649	508.113	0	0	0	0	0	0	0	0	65.7901	3.07788
4922501C03Rik	1129.75	2268.74	747.247	539.812	901.847	199.21	1975.22	538.082	1022.07	869.259	859.615	2706.18	1165.98	956.42	1301.47	331.55	889.039	552.498	666.806	1131.42	1136.86	504.959	1283.33	756.195	721.525	1178.72	960.444	425.178	697.678	503.67	1175.53	571.346	871.838	0	1462.06	1437.22	4523.19	1006.28	2077.82	80.1608	252.715	319.879	1100.81	440.375	890.387	800.513	470.096	1748.26	714.068
4922505G16Rik	12.09	33.7523	7.57254	55.8103	84.0836	0	126.184	39.4496	20.7901	86.3472	125.6	105.748	0	65.2897	57.5235	1.89457	0	2.98647	5.57565	15.5183	106.262	10.6183	86.9668	331.979	22.3457	0	4.27815	3.30878	207.88	0	0	0	0	0	150.135	61.2348	556.983	49.8051	208.689	70.1407	216.898	0	4.78613	7.32216	5.36378	64.0411	153.177	26.7546	15.3894
4930402H24Rik	1856.6	5118.1	2029.98	5438.69	1076.2	1914.29	15093.4	14637	3268.67	4919.12	2805.06	21500.4	2225.36	3608.88	2899.66	3841.24	10.1315	346.431	4636.87	4279.89	471.629	1360.91	319.048	1211.55	2396.38	2884.8	5317.74	3189.67	1594.69	1530.02	5858.03	1815.16	2543.96	1617.2	761.915	380.617	3133.79	1084.98	8578.94	1788.9	340.27	946.841	732.278	2555.43	4720.13	1104.71	628.555	3145.21	6062.54
4930404H11Rik	466.12	21.6979	39.7558	0.703491	0	0	0	0	0	0	0	0	0	0	662.958	0	0	0	0	431.607	0	1.17981	0	0	2.15381	0	0	87.6827	0	0	0	0	0	0	0	0	0	0	0	80.4739	0	0	0	81.5897	0	0	0	138.598	0.219848
4930404I05Rik	18.0035	3.0136	25.963	34.002	104.535	3.11266	66.0532	30.8736	4.20002	158.452	40.516	0	5.71094	0	0	0	0	0	103.253	6.05794	36.3912	127.125	21.1679	18.6811	143.228	6.75309	0	23.1615	0	1292.44	43.1748	0	15.0642	0	22.2587	31.8181	0	42.3756	77.1242	0	0	0	335.029	18.8284	0	26.6838	0	3.5088	15.6092
4930404N11Rik	255.335	140.936	384.577	60.5002	957.101	1456.73	103.407	131.58	126.421	409.037	346.412	19.2269	29.5065	232.75	337.95	4.73642	7.59863	313.58	31.5953	439.159	0	692.107	70.3895	73.946	301.802	169.441	269.523	155.513	259.137	190.064	0	384.268	248.559	0	228.04	727.914	0	877.781	231.373	50.7268	151.231	0	0	92.05	379.487	528.339	184.869	228.072	230.181
4930405A10Rik	0	0	46.517	11.0214	28.4432	0	0	0	0	0	0	0	0	0	0	0	0	0	4.74963	1.57672	0	16.3699	0	0	0	0	0	0	0	0	0	0	0	0	0	0	0	0	0	0	0	0	0	0	0	0	0	0	0
4930405A21Rik	51.7765	73.8332	94.9272	126.394	162.066	105.83	231.869	107.69	64.6803	672.529	211.359	259.563	389.296	0	0	0	0	0	93.96	97.8398	526.944	151.163	248.149	32.6919	49.5375	0	0	11.5807	0	0	0	0	0	0	123.981	81.0461	0	81.1741	0	0	0	0	784.926	5.23011	319.145	0	0	22.8072	141.363
4930405J17Rik	0	0	2.16358	18.9942	0	0	0	91.2731	0	0	0	0	0	0	0	0	0	0	0	0	0	0	0	0	0	0	0	0	0	0	0	0	0	0	57.0935	54.3309	0	30.2683	22.6836	0	0	0	0	0	0	0	0	0	0
4930405P13Rik	2.43113	15.3694	62.7439	28.1396	12.8897	0	0	5.88068	3.57002	15.133	2.0258	0	0.951824	0	0	0	0	0	0	10.7051	0	36.8691	46.6713	0	15.0766	0.613918	0	0	0	0	0	0	0	0	18.8086	0.900512	30.6035	7.15433	0	0	0	0	0	0	0	0	0	0	0
4930412C18Rik	286.742	155.1	86.2728	171.652	58.3043	0	457.817	0.490057	44.9402	592.413	0	76.9075	186.557	0	0	0	0	0	70.4184	219.58	0	6.48896	0	0	0	3.68351	720.155	201.836	0	0	251.199	0	514.065	0	53.6434	19.5111	146.897	40.9998	0	0	0	0	0	521.965	0	0	0	376.758	0
4930412F15Rik	2.29972	0.100453	11.6293	0	0.300759	0	3.64431	25.728	0.420002	168.689	0	0	0	0	168.736	736.987	0	0	2.47807	17.6759	0	0.147476	1.53021	0	0	0	0	11.5807	0	0	0	0	0	0	9.34865	0	0	1.92616	90.7344	38.2016	0	0	0	0	0	0	0	125.878	69.692
4930412O13Rik	0.0657063	16.8762	0	387.858	0	0	0	0	0	0	0	0	0	0	0	0	0	0	0	0	0	0	0	0	35.5378	0	0	0	0	0	0	0	0	0	0.779054	5.40307	0	2.75166	0	0	0	0	0	0	0	0	0	0	0
4930413F20Rik	6.57063	0.703174	15.1451	68.7076	0	0	28.2434	0	11.5501	225.215	90.4858	0	26.6511	0	0	0	0	0	0.206506	16.0992	0	0	0	0	0	2.45567	132.623	0	427.15	0	0	0	0	0	59.7646	185.205	183.621	87.2278	353.864	0	0	0	0	0	0	0	0	15.351	43.53
4930413G21Rik	48.4255	51.0303	117.915	132.96	117.64	12.4506	64.231	100.094	155.401	86.3472	129.651	28.8403	147.533	104.663	46.4982	51.1534	210.229	53.7565	109.241	69.1269	53.8589	168.861	120.886	140.497	47.653	112.347	72.0155	291.173	62.6486	47.5161	64.7622	65.7301	11.2981	134.767	180.629	192.109	1058.88	135.932	108.881	108.969	145.262	174.867	38.2891	19.8744	142.14	69.3778	279.945	96.4921	144.44
4930414L22Rik	1242.83	2343.08	8455.28	1334.76	2520.4	1403.81	1214.01	2717	6205.32	1900.08	1815.12	1610.25	1643.8	4295.17	3261.58	8347.47	2370.77	1072.14	5899.86	2127.17	724.912	1443.35	1674.81	2986.25	1314.09	2433.57	3821.1	393.745	3451.37	4580.55	8703.64	55.6178	1352.01	3840.86	2314.12	2408.27	15699.6	9366.66	3742.79	4768.32	5856.23	8709.23	2211.19	105.648	2172.33	213.47	1135.63	10497	3284.54
4930414N06Rik	24.5084	0	35.9695	3.28296	160.863	0	1.82216	14.9467	0	0.890178	75.6299	0	0	0	0	0	0	0	9.49925	25.7255	0	60.3179	7.65104	0	53.3067	208.118	0	125.734	11.3907	0	0	0	0	0	15.1359	4.80273	0	12.1073	0	47.2823	0	0	177.087	5.23011	89.8433	0	26.4099	25.4388	43.3102
4930415F15Rik	0.459944	2.41088	6.76119	28.6086	0	0	0	0	0	0	0	0	0	0	0	0	0	0	18.792	10.2902	0	20.4992	9.43628	0	7.53832	0	0	76.102	0	0	0	0	0	0	0.111293	0	0	2.75166	22.6836	0	0	0	0	0	0	0	0	0	0
4930415O20Rik	17.4122	1.20544	8.38388	27.4361	0	0	28.2434	0.980114	13.2301	31.6013	20.258	0	36.1693	0	0	0	0	0	10.3253	23.07	0	3.39196	3.31545	0	0	451.843	2.13907	31.4334	2.84766	0	0	0	0	0	193.762	80.4458	91.8104	453.199	13.6102	0	0	0	0	0	0	0	0	23.6844	0
4930419G24Rik	13.864	0	140.092	0	0	0	29.61	1530.08	0.210001	227.886	90.4858	0	235.1	0	0	0	0	0	0	0	0	0	0	0	0	0	0	0	0	0	0	0	0	0	1.11293	59.4338	6.12069	4.67783	480.892	0	0	0	0	0	0	0	0	0	0
4930420K17Rik	844.26	1981.64	692.346	996.377	7814.66	6751.36	3658.89	3295.02	3804.59	421.499	1301.24	1523.73	1215.48	2435.16	1022	3012.36	15762.1	8648.83	2506.36	720.729	8998.8	4258.38	17732.8	5053.23	5673.12	1432.27	1622.84	522.787	1028.01	8837.99	2829.91	171.909	2108.98	12028	1388.16	1244.21	6438.97	7955.61	1288.43	3864.31	10916.5	10662.6	5087.66	11173.6	2778.44	5987.84	15634.7	1587.73	6945.89
4930422G04Rik	119.52	61.9797	92.4931	48.5408	88.8098	516.702	263.757	127.292	70.3503	285.302	305.896	1504.5	194.172	184.904	9.58725	8.52556	243.156	125.432	51.2134	87.9646	200.879	175.497	153.276	295.006	40.6531	63.2335	45.6336	8.27195	0	380.128	0	0	0	218.996	255.53	71.4406	428.449	117.496	45.3672	316.886	45.7674	720.793	1675.15	7.32216	501.513	0	47.5378	48.6847	110.364
4930427A07Rik	64.5235	104.17	217.44	339.082	47.2191	2303.37	0.455539	477.438	19.3201	1477.25	639.478	0	154.195	149.02	40.2664	0	7.59863	2.98647	117.708	178.502	17.4678	536.962	419.022	647.222	394.685	151.638	46.3466	0	0	0	0	0	0	0	2064.49	394.424	9223.88	298.556	0	100.201	1.98989	136.482	0	0	0	0	0	6.14041	101.79
4930429B21Rik	58.4786	0.904081	17.5791	24.8567	55.8552	0	128.918	52.9261	0.210001	541.673	144.507	0	17.1328	0	0	0	0	0	0	23.6509	1.45565	0	0.765104	22.1838	53.5759	292.839	0	263.048	0	0	0	0	0	0	181.52	174.699	924.225	89.1539	680.508	0	0	0	0	0	0	0	0	71.0533	14.9497
4930429F24Rik	57.493	371.778	30.0197	5.86242	31.7945	0	10.9329	8.20845	152.671	32.4915	0	0	697.687	1.49518	10.546	110.832	0	0	547.446	46.3889	0	7.37382	0	5.05946	0	98.2268	0	949.62	0	0	0	0	0	0	13.5778	16.5094	0	12.3825	0	0.313128	0	179.132	0	0	0	0	0	82.8955	48.1468
4930430F08Rik	496.805	538.229	265.309	248.567	567.704	59.1406	1357.51	1963.04	517.022	1127.41	1510.57	624.873	455.924	310.998	619.816	0	531.904	32.8512	531.545	410.363	144.109	175.939	44.121	387.633	519.875	854.573	347.956	339.15	2204.09	0	1098.99	3514.03	3.76604	0	281.35	102.658	495.776	150.241	104.345	265.846	378.078	0	4.78613	1174.68	242.711	1627.71	31.6919	998.694	269.974
4930432K21Rik	102.436	323.46	0.811343	98.2542	246.236	0	439.595	352.596	357.842	214.533	346.412	52.8739	38.0729	0	0	0	0	0	225.091	87.3837	234.359	49.2571	2.80538	395.027	14.8074	459.21	2.13907	0	0	0	0	0	0	0	248.741	75.3429	6.12069	205.549	99.8078	0	0	0	0	0	0	0	0	982.465	42.8705
4930433N12Rik	6.50492	0.200907	1.89313	26.4981	0	0	0	0	0	0	0	0	0	0	0	0	0	0	3.51059	3.81733	0	0	0	0	0	3.68351	0	0	8.54299	0	0	0	0	0	46.0755	53.7306	0	8.80533	0	0	0	0	0	0	0	0	0	0	0
4930441O14Rik	137.917	62.5825	37.8627	14.0698	266	0	61.9533	79.8793	10.08	157.116	468.635	0	35.2175	0	1.91745	16.1038	0	0	60.9191	116.927	0	60.1704	62.2284	62.6595	118.19	133.834	2.13907	0	2.84766	0	0	0	0	0	194.986	42.0239	48.9655	114.194	4.53672	0	145.262	0	0	104.602	26.8189	0	0	214.914	0.219848
4930443O20Rik	61.7639	179.008	37.5922	32.1261	15.4246	0	26.4213	3.67543	140.491	5.34107	0	0	25.6992	0	23.9681	306.92	0	44.7971	34.2799	54.0235	0	0.294953	0	0	0.269226	49.1134	0	1.65439	0	0	0	0	0	0	33.0541	4.80273	12.2414	3.85233	0	8.45446	0	0	0	0	0	0	0	139.475	34.9559
4930444A02Rik	2915.19	1015.38	2322.06	510.5	2862.92	9229.04	3740.43	1811	1817.56	3064.44	5849.16	2831.16	2343.39	20.9326	1173.96	74.8355	68.3876	50.7701	766.755	2469.4	1679.82	784.87	593.72	711.438	2034.27	2539.16	2598.97	1831.41	3596.6	57.0193	376.798	4621.33	847.359	0	1599.18	1674.65	556.983	305.16	571.627	238.291	3.97977	844.479	9.57227	1728.03	36.2055	5619.6	1510.65	1653.52	1187.18
4930444M15Rik	0	0	123.324	0	0	0	0	5.1456	60.2703	23.5897	0	0	117.074	0	0	0	0	0	202.788	24.7297	0	0.147476	0	0	0	0	0	0	0	0	0	0	0	0	247.183	351.5	1205.78	425.132	0	0	0	0	0	0	0	0	0	51.3163	0
4930447N08Rik	14.7182	0	5.94985	5.39343	0	0	0	0.490057	0	11.1272	0	0	77.0977	0	0	0	0	0	0	0	0	0	0	0	0	184.175	0	0	0	0	0	0	0	0	18.3634	7.50427	0	24.4898	0	0	0	0	0	0	0	0	0	0	0
4930452B06Rik	0.197119	18.383	1.08179	2054.43	0.300759	3.11266	2.2777	72.7734	32.9702	980.086	213.384	4.80672	2.85547	0	0	0	0	0	42.7466	0.0829855	0	19.7618	1.27517	0	0	0	0	172.057	0	0	0	0	0	0	194.096	131.775	0	13.208	0	0	0	0	0	257.321	0	0	2170.89	0.877201	975.028
4930453N24Rik	3589.86	3342.89	2582.78	4378.29	3366.57	554.054	3709.46	3043.25	4088.09	2136.43	2775.35	1562.18	3825.38	7980.8	3426.96	2063.19	2583.53	4294.55	2700.27	3269.63	12996	2009.37	3735.24	5477.06	2760.91	2109.42	3931.62	3510.62	5185.6	2309.28	2796.55	16713.1	2818.88	6199.28	1954.54	2827.31	1169.05	1795.19	2608.61	4462.08	2811.71	3872.66	9682.35	3434.09	2856.21	3084.65	4283.68	4030.3	2931.68
4930455C13Rik	6.04498	9.44262	18.12	31.4226	19.3775	0	3.18877	4.77805	0.210001	53.4107	38.4902	0	31.4102	0	0	0	0	0	23.9546	6.22391	32.0242	15.1901	0.765104	59.9352	4.57684	62.0057	0	1.65439	0	0	0	0	0	0	10.0164	52.5299	0	26.416	0	0	0	0	0	7.32216	1.34094	0	0	40.7899	21.9848
4930455C21Rik	2936.35	2022.33	1627.55	1551.9	3301.82	2994.38	2915.91	1671.83	1159.42	2606	2104.81	3730.01	2131.13	2809.45	2190.21	656.468	2583.53	2380.22	1397.22	1921.94	2157.27	2052.14	2231.55	784.995	1122.94	1501.03	1783.99	3191.32	2429.06	1530.02	1893.8	3802.23	4231.15	404.301	2955.73	3974.26	4076.38	3233.21	3656.6	1399.37	650.693	1795.59	1603.35	3233.25	639.631	1649.06	205.997	2654.85	2064.16
4930455D15Rik	0	0	12.9815	0	0	0	0	0	0	0	0	0	0	0	0	0	0	0	5.98866	2.07464	0	20.9417	0	0.778379	0	0	0	0	0	0	0	0	0	0	1.89199	1.80102	0	6.60399	18.1469	0	0	0	0	0	0	0	0	0	0
4930455F16Rik	0	0	108.179	10.3179	0	0	0	0	0	0	0	0	0	0	0	0	0	0	0	0	0	0	0	0	0	0	0	0	0	0	0	0	0	0	0.111293	0.900512	0	10.7315	0	0	0	0	0	0	0	0	0	0	0
4930455F23Rik	1323.06	1158.03	848.665	1114.56	769.04	2132.17	3229.77	1513.42	1357.03	3123.19	2191.92	9099.11	956.583	389.246	824.024	493.535	1788.21	5.97295	1797.42	1383.95	2183.47	709.214	706.701	212.108	1138.82	7.98093	787.179	1080.32	170.86	1330.45	412.123	5281.16	3628.58	0	1181.27	1418.31	1554.66	895.392	1887.28	263.654	1038.72	12.7951	153.156	1473.85	122.026	3698.37	5.28198	366.232	401.443
4930455H04Rik	0.0657063	450.433	21.3654	13.1318	0	0	98.3965	1.10263	602.283	22.6995	26.3354	0	0	0	0	456.591	0	0	128.859	0.165971	0	0	0	0	0	0	12.8344	51.2861	0	0	0	0	0	0	0	0	0	0	0	124.312	0	0	0	18.8284	0	5.33676	0	0	419.691
4930471G03Rik	0	0	20.8245	0	0	0	190.415	3.79794	0	61.8674	253.9	0	0	0	0	0	0	0	0	0.663884	0	35.0994	0	0	0	0	0	0	0	0	0	0	0	0	4.89691	0	0	3.02683	0	0	0	0	0	0	0	0	0	115.791	0
4930471I20Rik	11.1044	0.904081	1.62269	26.7326	13.706	0	169.916	8.45348	0.630003	0	9.45374	0	0	0	0	0	0	0	0	0	0	0	0	0	0	0	0	6.61756	0	0	0	0	0	0	58.0952	67.5384	55.0862	24.765	0	0	0	0	0	27.1966	0	0	285.227	0	0
4930471M23Rik	3466.99	3198.44	2408.88	5000.18	9012.71	4002.88	10734.3	6783.24	2739.46	1600.98	6352.91	9647.08	3965.3	1638.22	2092.42	3363.81	942.23	13262.9	2408.06	2835.94	1243.12	4493.9	1946.68	1944.39	6822.45	14915.7	1533.72	9800.61	4929.31	7250.95	1978.19	7753.62	5212.2	16.8459	2128.49	2227.57	250.948	4220.5	1283.89	1495.81	4286.21	1863.83	469.041	3914.22	3824.37	2540.3	1199.01	7796.56	3444.59
4930473A02Rik	89.8204	234.659	149.558	94.5022	194.634	18.676	282.89	156.083	8.19004	98.8097	66.8514	4.80672	8.56641	19.9358	194.142	36.9441	0	203.08	103.872	113.607	0	142.905	153.276	97.2973	72.6909	36.2211	84.8499	3.30878	2.84766	0	0	0	0	0	55.3128	23.4133	214.224	21.7381	0	140.595	0	302.818	0	10.4602	836.75	0	0	121.492	88.5989
4930473A06Rik	282.011	81.8695	290.461	219.255	265.828	93.3798	373.542	328.583	20.3701	79.6709	137.079	0	0.951824	172.445	346.1	78.6246	182.367	8.95942	0.619517	341.734	85.8831	371.198	277.733	190.314	64.8834	612.69	137.614	41.3598	0	0	7.84996	1286.79	9.4151	0	300.937	229.03	165.259	155.744	526.259	278.997	1697.37	0	1943.17	1157.95	72.411	688.442	21.1279	546.058	10.7726
4930474M22Rik	66.2976	0	27.0448	0.468994	0	0	0	0	0	0	0	0	0	0	119.841	0	0	0	0	18.5887	0	0	0	0	0	0	0	0	0	0	0	0	0	0	37.6172	9.60546	0	2.75166	0	0	0	0	0	0	0	0	0	0	0
4930478L05Rik	9.85594	7.73491	281.536	167.665	50.7853	0	0.911078	258.137	34.4402	23.5897	41.1913	0	76.1459	27.4117	169.694	39.7859	1246.17	2.98647	37.584	177.672	382.835	407.772	502.673	569.773	76.9986	0	0.713024	16.5439	0	0	0	0	0	0	9.68253	0.300171	0	3.302	331.181	279.623	212.918	277.228	516.902	1.04602	0	16.0103	0	94.2991	249.968
4930481A15Rik	1057.15	907.195	420.276	692.469	1898.6	775.053	1603.95	580.227	809.344	487.372	555.069	615.26	2777.42	1581.41	646.181	545.636	1512.13	65.7024	814.045	1152.34	397.391	677.949	1611.05	766.703	1120.52	2632.48	1464.55	5466.11	4203.15	9.50321	1407.11	5799.42	1478.17	33.6917	1646.92	1611.92	875.259	2395.87	3044.14	1400.31	411.906	1266.72	492.972	2544.97	2150.88	517.665	2276.53	1000.45	1246.98
4930483K19Rik	3.1539	0	2.16358	7.2694	0	0	33.2544	48.0256	0	0.445089	11.4795	0	6.66277	0	0	0	0	0	0.826022	2.07464	0	0	0.510069	0	2.15381	0	0	0	0	0	0	0	0	0	17.5844	31.5179	55.0862	18.161	9.07344	0	0	0	0	10.4602	0	0	0	6.57901	0.879394
4930486I03Rik	0	0	0	7.97289	0	0	0	0	0	0	0	0	0	0	0	0	0	0	0	0	0	0	0	0	0	0	0	0	0	0	0	0	0	0	0	0	0	0	0	0	0	0	0	0	0	0	0	0	0
4930487H11Rik	7.62193	771.984	142.526	0	236.869	12.4506	95.6632	11.8839	14.4901	155.781	47.2687	0	1.90365	0	112.171	2302.85	0	1564.91	605.681	28.381	0	48.6672	0	0	13.1921	0	234.585	52.9405	0	0	510.247	75.8424	5.64906	0	79.0183	58.2331	0	22.0133	308.497	0.626256	0	0	0	7.32216	764.339	0	0	292.547	382.756
4930502E09Rik	1.51124	15.8716	83.2979	30.7191	64.6202	0	35.9876	150.325	76.0204	357.406	0.675267	0	13.3255	0	9.58725	622.366	0	0	147.858	75.5168	0	35.2469	28.5639	0	22.3457	0	0	0	0	0	0	0	0	0	66.5535	72.3412	0	277.093	0	111.787	0	0	0	0	0	0	0	0	0
4930503B20Rik	5.19079	0	6.2203	1.40698	0	0	34.621	0	0	0	0	0	203.69	376.288	45.0601	0	0	0	27.4652	4.81316	14.5565	3.09701	0	0	0	342.566	0	29.779	122.45	0	0	0	0	0	52.1966	67.2383	0	1.37583	18.1469	56.3631	0	0	0	0	0	0	0	0	0
4930503E24Rik	0.854181	0.200907	2.16358	0.234497	0	0	0	0.245028	1.05	0.890178	0.675267	4.80672	0	0	0	0	0	0	0.619517	0.746869	0	0.589906	0.255035	0.778379	0.538451	1.22784	1.42605	0	0	0	0	0	0	0	2.89363	2.70154	0	6.60399	0	0	0	0	0	0	0	0	0	0.438601	1.09924
4930503L19Rik	888.02	2248.25	718.85	21.5737	350.857	762.602	224.581	520.563	1329.73	882.611	1472.76	586.419	1124.1	286.577	960.163	1395.35	853.579	973.59	1204.13	546.708	525.488	481.068	535.318	266.595	615.719	1153.55	358.651	368.929	589.467	589.199	1862.4	2.52808	489.585	842.294	6.00985	39.6225	30.6035	8.53016	0	702.346	610.895	605.637	2340.42	31.3807	4488.14	0	353.893	899.57	1353.17
4930505A04Rik	59.267	0.100453	2.43403	31.1881	0	0	12.2996	43.0025	9.24004	26.2602	220.137	0	0.951824	0	0	0	0	0	0	24.3977	0	0	0	0.389189	0.269226	0	0	0	0	0	0	0	0	0	0.33388	0	0	3.85233	40.8305	0	0	0	0	0	0	0	0	0	1.53894
4930506M07Rik	278.463	240.184	80.8639	782.047	34.4154	1624.81	23.2325	5118.64	151.831	1373.99	535.487	211.496	49.4948	0.99679	22.0507	974.756	98.7821	1042.28	233.764	4.31524	1.45565	3697.38	0.510069	74.3352	1996.04	0.613918	0	71.1388	0	3060.03	7.84996	338.763	1056.37	0	1193.73	521.697	1542.41	1419.31	1125.11	0.626256	5.96966	0	14.3584	2456.06	147.504	1099.37	1758.9	77.1937	230.181
4930507D05Rik	63.6694	42.1904	200.402	87.2328	79.7441	133.844	139.851	73.386	38.8502	555.916	197.178	288.403	13.3255	472.977	36.9109	0.947284	0	274.756	12.8033	108.545	59.6815	417.801	4.84566	305.124	23.1534	14.734	208.916	11.5807	5.69533	9.50321	9.81245	12.6404	0	16.8459	276.787	117.067	67.3276	62.7379	0	114.918	0	0	598.267	37.6568	172.982	0	649.683	69.7375	60.6782
4930509E16Rik	0.591356	66.6006	0	137.415	0	0	0	0.122514	102.69	27.1504	0	0	0	0	0	0	0	0	31.1823	18.6717	0	2.5071	0.510069	0	23.1534	0	298.044	0	0	0	0	0	0	0	320.525	60.6345	0	41.8253	9.07344	0	0	0	0	0	0	0	0	0	0
4930512B01Rik	104.144	265.297	175.791	348.697	173.624	18.676	363.52	428.555	119.071	202.07	116.821	0	83.7605	38.3764	171.132	70.099	666.146	0	379.97	87.7986	0	49.4046	34.9397	0	26.6533	91.4737	151.874	26.4702	14.2383	0	151.112	171.909	141.227	0	149.022	20.1114	330.517	137.583	0	228.584	0	0	210.59	15.6903	1009.73	576.37	0	95.1763	86.4005
4930513D17Rik	0	0	0	44.0854	0	0	0	0	0	0	0	0	0	0	0	0	0	0	0	0	0	0	0	0	0	0	0	0	0	0	0	0	0	0	9.34865	0	0	0.825499	0	0	0	0	0	0	0	0	0	0	0
4930513N10Rik	38.8324	41.0854	35.6991	76.446	74.5452	0	17.3105	37.9794	2.10001	38.2776	60.0987	0	16.181	0	4.79362	1.89457	0	0	468.974	158.004	0	45.5702	17.0873	217.168	26.6533	508.324	1.42605	5667.94	0	237.58	421.935	0	0	0	247.85	127.873	171.379	173.905	31.757	2.81815	0	0	0	0	0	0	0	0	2.41833
4930515G01Rik	89.6233	148.169	20.554	74.8045	301.489	846.644	64.6866	41.5323	116.131	4.45089	163.415	0	11.4219	0	0.958725	0.947284	0	0	178.834	30.7876	2.91129	86.5687	61.2083	109.362	352.416	3.68351	249.559	1.65439	0	570.193	1.96249	0	0	16.8459	237.5	148.885	2999.14	317.542	308.497	1.87877	0	0	4.78613	59.6233	292.326	795.177	274.663	22.8072	216.771
4930519G04Rik	0	0	1.35224	1.64148	0.300759	0	0	0.122514	0.210001	13.3527	16.8817	0	0	0	0	0	0	0	0.826022	0.414927	0	139.513	13.2618	0	0	0	0	0	0	0	0	0	0	0	1.44681	17.7101	55.0862	36.0468	0	0	0	0	0	0	0	0	0	0	0
4930521E06Rik	18.332	6.83083	17.8496	0	0	0	12.2996	0	5.88003	0	0	0	0	0	6.71107	24.6294	0	0	0.619517	3.90032	0	0	0	0	0	0	0	0	37.0196	0	0	0	0	0	6.67761	1.20068	0	3.85233	0	0.939384	0	0	0	0	0	0	0	12.7194	2.41833
4930523C07Rik	14627.9	25062.9	5315.38	5708.12	502.138	1553.22	2293.18	472.782	7951.27	487.372	246.472	1225.71	37453.3	8024.16	17509.7	29174.5	50781.6	5925.16	15735.9	11717.5	16033.9	6876.83	35024.7	22238.7	4282.57	33386.7	8539.89	1783.43	36726.3	332.612	12875.9	13628.9	37.6604	5677.06	2245.01	4241.11	177.5	243.247	1292.97	6357.13	29794.6	34026.6	12482.2	1453.97	5888.09	4445.52	19062.7	21054.1	14179.3
4930524L23Rik	114.657	36.565	33.5355	48.0719	389.698	105.83	43.2762	89.5579	2.52001	111.717	117.496	0	0	0	61.8378	353.337	0	0	18.1725	102.404	0	47.1925	99.9736	220.67	71.8833	0	354.373	3.30878	5.69533	0	0	0	0	0	50.9724	37.8215	0	9.90599	2744.72	158.756	0	4.26505	0	99.3721	88.5024	0	0	200.002	112.562
4930525G20Rik	52.1051	0	40.8376	7.2694	69.6042	6.22532	0	88.8228	0.840004	125.07	10.129	0	0	0	0	0	0	0	0	37.0115	0	23.8912	0	0	0	0	231.02	6.61756	0	0	0	0	0	0	65.3292	57.6328	6.12069	6.32883	0	0	0	0	0	0	0	0	0	0	0
4930526I15Rik	429.456	341.642	886.257	976.914	901.761	220.999	160.35	340.222	456.332	509.182	434.197	269.176	896.618	551.723	582.905	937.812	448.319	253.85	1100.05	751.765	128.097	818.642	426.163	219.114	409.223	416.236	397.868	716.351	179.403	1235.42	516.135	384.268	340.827	67.3835	1303.36	2186.74	7767.16	6263.61	5475.82	409.885	79.5954	106.626	167.515	403.765	240.029	170.776	802.861	718.428	585.017
4930528A17Rik	34.5615	16.6753	27.8561	60.7347	81.5916	77.8165	17.3105	72.2834	31.9201	23.5897	28.3612	0	31.4102	38.8748	77.6567	99.4649	0	8.95942	28.2913	30.4557	0	50.5844	82.3762	21.4054	89.1137	42.9742	3.56512	0	0	0	0	0	0	0	129.768	42.6243	899.742	105.939	86.1977	17.5352	83.5752	409.445	19.1445	56.4852	85.8205	0	0	36.8425	20.4459
4930528F23Rik	88.2435	2.41088	1166.71	37.285	0	0	0	0.245028	0	17.3585	0.675267	0	0	0	120.32	1.89457	0	0	6.19517	617.246	0	0.147476	0	0	0	693.727	0	0	0	0	0	0	0	0	24.7071	5.70324	24.4828	35.7716	0	0	0	0	0	1534.51	0	0	0	0	0
4930533B01Rik	0	0	15.4155	20.6357	20.7953	0	0	8.57599	0.210001	4.0058	4.72687	0	0	0	0	0	0	0	0.413011	10.2902	0	29.9377	0	0	30.6917	0	0	13.2351	0	0	0	0	0	0	27.7121	51.9295	24.4828	100.161	163.322	0	0	0	0	25.1045	316.463	0	0	0	0
4930534B04Rik	718.761	452.844	243.673	105.524	191.154	1394.47	4139.48	515.172	364.352	632.916	101.29	0	3.80729	5320.36	123.196	406.385	255.82	427.066	353.124	469.283	966.549	635.181	585.814	251.027	741.717	105.594	896.272	688.226	0	0	0	0	0	0	527.865	83.4475	801.811	52.0065	22.6836	3251.21	41.7876	980.961	90.9365	67.9914	147.504	336.216	470.096	339.477	3.29773
4930538K18Rik	20.7632	20.2916	2.70448	20.4012	10.6555	0	0	19.8473	0	89.908	0.675267	0	0	0	0	0	0	0	17.14	28.63	0	1.32729	0	0	0	0	0	0	62.6486	0	0	0	0	0	21.9248	13.2075	0	3.57716	0	0	0	0	0	0	0	0	0	26.316	25.7223
4930539E08Rik	90.5432	2.10952	90.0591	19.6977	52.332	0	0	0.122514	0	19.1388	0	4.80672	0	0	0	0	0	0	0	27.8001	0	82.5868	1.27517	3.11351	5.92297	23.3289	0	0	0	0	0	0	0	0	530.091	2640.3	29899.6	21229.1	21476.8	0	0	0	0	0	0	0	0	0	0
4930539J05Rik	15.0467	14.4653	34.0764	19.6977	22.0413	0	20.0437	16.907	7.98004	27.1504	8.77847	81.7142	10.4701	52.3315	29.2411	29.3658	2.53288	14.9324	27.0522	30.9536	10.1895	16.8123	15.047	8.17298	8.07677	3.68351	10.6954	167.093	62.6486	0	1.96249	0	13.1811	16.8459	49.303	38.722	110.172	77.8721	31.757	70.767	13.9292	17.0602	9.57227	61.7153	6.70472	0	10.564	8.77201	10.7726
4930544O15Rik	0	0	96.5498	89.5778	0	0	358.965	8.20845	16.5901	0	0	0	18.0846	0	0	0	0	0	3.9236	0.0829855	0	3.24448	0.255035	0	0	0	0	246.504	0	0	0	0	0	0	74.9005	11.1063	0	13.4832	0	0	0	0	0	0	0	0	0	0	0
4930545L23Rik	0	125.868	47.0579	0	0	0	337.554	3.67543	194.881	211.862	101.29	288.403	4.75912	0.498395	2.39681	81.4665	0	0	100.155	11.286	0	107.51	0.765104	0	0	0	33.5121	16.5439	0	0	0	0	0	0	1.44681	60.9347	12.2414	1.92616	0	0	0	0	0	17.7824	0	0	0	0.438601	323.397
4930546K05Rik	16.7551	1.20544	13.7928	221.6	0	0	0	0	0	0	0	0	0	0	0	0	0	0	0	0	0	0	0	0	0	53.4108	0	0	0	0	0	0	0	0	3.89527	0.900512	6.12069	10.7315	95.2711	0	0	0	0	0	0	0	0	0	0
4930547E08Rik	0	0	3.24537	16.1803	15.7254	0	22.777	1.10263	7.35003	14.6879	0	0	0	0	0	0	0	0	0	0	0	0	0	0	0	0	0	0	0	0	0	0	0	0	8.90347	14.108	0	2.75166	0	0	0	0	0	0	0	0	0	0	0
4930547N16Rik	7.55622	51.4321	51.926	72.9285	2.70683	526.04	51.9315	9.43359	0.420002	832.316	37.8149	0	0	0	0	0	0	0	0.206506	47.7996	0	262.213	23.9732	63.0487	92.6136	545.159	0	218.38	0	0	0	0	0	0	573.272	9.00512	73.4483	53.9326	77.1242	0	0	0	0	0	0	0	0	35.5267	0
4930549G23Rik	255.335	195.985	243.133	272.72	474.297	217.886	68.3309	106.342	18.2701	54.3008	56.7224	19.2269	86.616	1709.49	609.27	452.802	306.478	155.297	221.787	127.466	299.863	153.818	451.156	53.3189	31.7686	65.6892	69.1634	26.4702	560.99	617.709	184.474	0	15.0642	0	227.484	211.32	6.12069	147.214	4.53672	322.209	497.471	0	100.509	8.36818	38.8874	0	147.895	653.515	134.987
4930550C14Rik	192.519	65.4956	244.214	25.3257	44.3405	18.676	130.74	33.2013	124.111	18.6937	143.832	0	981.33	56.3186	96.3518	0	0	0	207.538	254.101	0	24.776	14.537	42.8108	0	198.909	516.943	327.569	637.877	0	0	0	0	0	43.4044	154.888	36.7242	52.0065	13.6102	308.118	0	0	0	0	0	0	0	196.054	82.0035
4930552P12Rik	1.24842	6.12766	70.5869	67.7696	25.3926	0	0	48.2706	29.4001	76.5553	334.932	0	0	0	0	0	0	0	81.5697	85.807	0	117.981	180.82	0	154.805	0	0	29.779	0	0	0	0	0	0	73.8988	12.0068	0	235.818	0	0	0	0	4.78613	3.13807	32.1827	5.33676	0	14.0352	63.5362
4930555I21Rik	17.3465	2.10952	10.277	98.4887	47.8636	3.11266	93.3855	37.3668	27.5101	0	62.7998	317.243	0	0	0	0	0	0	0	1.32777	0	27.8731	0	0	43.6146	0	0	44.6685	0	0	0	0	0	0	142.678	69.0393	48.9655	138.684	0	0	0	0	0	0	0	0	0	0	26.3818
4930556M19Rik	52.1051	811.463	205.54	1844.08	131.775	0	94.2966	0.245028	1101.04	0.445089	1.35053	0	363.597	74.7592	59.9203	776.773	0	0	1096.96	90.5371	0	66.5119	0	0	23.1534	0	583.254	1.65439	0	19.0064	1573.92	0	698.601	0	431.262	154.288	893.621	588.306	449.135	0	0	0	43.0752	973.847	762.998	5.33676	0	344.74	1682.28
4930558J18Rik	0	0	0.270448	34.94	0	0	0	1.59268	0.210001	213.643	160.038	0	0	0	0	0	0	0	1.03253	1.32777	0	42.7682	10.7115	0	0	0	0	0	0	0	0	0	0	0	85.2508	3.00171	104.052	5.77849	0	0	0	0	0	0	0	0	0	0	0
4930558K02Rik	1.77407	0	10.0066	8.91088	11.257	0	0	56.479	0.420002	16.9134	61.4493	0	19.0365	0	0	0	0	0	10.5318	9.21139	0	3.53944	0	0	7.80755	0	0	0	0	0	0	0	0	0	23.5942	13.5077	73.4483	33.5703	45.3672	0	0	0	0	0	0	0	0	0	0
4930562C15Rik	110.321	39.0764	200.672	134.132	23.2444	0	0.911078	24.5028	155.401	92.5785	85.7589	0	638.674	0	78.1361	123.147	0	0	274.033	171.946	2.91129	195.996	141.544	66.1622	0.538451	44.2021	141.892	6.61756	0	0	0	0	0	0	365.822	466.165	238.707	181.885	2023.38	445.581	0	0	0	0	0	0	0	185.528	519.062
4930562F07Rik	77.5334	121.85	75.7254	73.3975	14.0497	9.33798	33.7099	1.10263	13.8601	31.6013	0	0	572.998	0.498395	218.11	219.77	35.4603	2.98647	41.0946	102.57	1099.01	108.69	558.271	715.719	31.4994	54.0248	17.8256	1.65439	54.1056	0	0	0	0	0	14.802	52.8301	0	0	372.011	3.44441	222.867	8.5301	0	23.0125	20.1142	0	58.1018	152.194	17.5879
4930563E22Rik	305.731	300.155	202.295	167.9	518.293	0	575.346	203.986	148.471	496.274	1256	389.344	154.195	0	0.958725	811.823	0	0	301.085	138.669	0	244.958	474.364	169.687	64.0757	221.624	7.13024	90.9915	680.592	0	1040.12	0	0	4278.85	408.892	344.296	6.12069	140.06	4.53672	61.3731	268.635	0	4.78613	33.4727	210.528	0	797.579	85.5271	179.836
4930563F08Rik	69.6486	111.001	156.319	2.34497	0	0	439.595	192.592	6.51003	391.678	190.425	1172.84	59.9649	161.978	402.664	406.385	119.045	0	67.9403	188.045	0	0	0.255035	31.1351	4.03839	655.664	0	0	0	0	0	0	0	0	3.00492	0	0	0.825499	0	23.4846	0	0	0	0	0	0	0	283.775	185.112
4930565N06Rik	5.2565	68.7101	4.86806	9.14538	28.6151	0	160.805	39.5721	1.26001	9.79196	0.675267	0	25.6992	0	48.895	0.947284	0	0	26.6392	25.5595	0	19.4669	19.6377	69.6649	6.73064	1.22784	0	0	150.926	0	0	0	0	0	26.933	48.6277	0	60.8118	13.6102	0.313128	1.98989	0	0	42.8869	203.824	218.807	0	6.57901	65.295
4930568K20Rik	0.854181	3.21451	29.2084	4.45544	0	0	0.455539	0	16.8001	132.191	47.2687	0	0	0	32.5966	290.816	0	0	133.196	20.7464	0	0.737382	0	188.368	0.269226	0	7.84327	0	0	0	0	0	0	0	2.89363	0.300171	0	7.70466	0	43.2117	3.97977	0	0	18.8284	0	0	0	0	57.8202
4930570G19Rik	236.871	1.70771	282.347	0.468994	0	0	570.791	60.522	0.210001	1345.5	420.691	1148.81	0	0	40.2664	0.947284	0	0	0	66.8033	0	43.8005	0.510069	0	26.6533	0	0	0	0	0	0	0	0	0	0.445174	1.80102	0	5.77849	122.491	0	0	0	0	0	0	0	0	199.563	0
4930572J05Rik	61.8953	5.72584	17.0382	73.8665	14.6513	0	205.904	39.2045	145.111	339.603	93.1868	0	66.6277	0.498395	1.91745	6.63099	5.06575	0	1.65204	21.1613	0	13.8628	402.19	169.297	1.88458	301.434	0.713024	243.195	2.84766	0	0	0	0	0	35.9478	21.9125	508.018	1.10067	0	0	0	0	397.249	46.025	8.04567	0	0	50.4391	4.61682
4930578I06Rik	0	0	0	27.9051	0	0	0	0	0	0	0	0	0	0	0	0	0	0	0	0	0	0	0	0	0	0	0	0	0	0	0	0	0	0	5.23079	0	0	7.70466	0	0	0	0	0	0	0	0	0	0	0
4930578M01Rik	103.553	4.92222	29.4788	28.1396	150.294	43.5773	384.019	135.011	38.4302	406.811	83.0578	0	8.56641	22.4278	21.5713	43.5751	121.578	0	100.568	57.8409	0	135.088	121.651	119.481	74.0371	58.9361	0	1265.61	105.364	0	0	0	0	0	17.3618	59.1336	128.535	36.5971	49.9039	47.9086	0	0	0	0	0	0	0	37.7197	9.45349
4930578N16Rik	211.377	136.516	163.08	71.756	216.46	0	447.339	351.738	90.0904	353.846	510.502	1547.76	199.883	146.03	254.062	7.57828	0	0	23.3351	183.813	160.121	102.791	101.504	0.778379	82.6523	103.752	131.91	92.6459	34.172	9.50321	1.96249	0	41.4264	0	187.529	86.7494	232.586	64.9393	580.7	133.706	113.423	200.457	143.584	117.154	195.778	0	0	264.476	153.674
4930579G18Rik	51.7765	51.834	18.3904	64.2521	185.439	320.604	208.181	111.243	28.9801	141.538	7.42794	67.294	407.381	72.2673	40.7458	821.296	334.34	0	89.8299	33.7751	164.488	97.7769	184.39	173.189	21.8073	103.138	4.27815	38.051	8.54299	0	200.174	0	16.9472	0	51.8627	67.8386	0	187.663	353.864	95.8172	264.655	294.288	315.885	7.32216	56.3197	122.745	47.5378	124.124	63.5362
4930579G22Rik	81.9357	121.649	110.343	228.165	146.856	196.098	273.779	54.8864	109.201	52.9656	89.1352	211.496	166.569	0	0	0	0	0	376.047	49.1274	14.5565	121.078	0	1.55676	44.9607	194.612	135.475	191.909	0	361.122	117.749	121.348	16.9472	0	58.7629	94.854	801.811	88.6036	254.056	0	0	0	4.78613	36.6108	189.073	0	31.6919	50.8777	85.7409
4930579G24Rik	1399.81	443.301	500.869	315.398	146.384	2991.27	102.041	1509.86	407.402	587.962	937.27	0	433.08	193.876	510.521	323.971	1256.31	35.8377	762.831	589.28	433.783	385.209	571.532	317.189	441.53	3844.97	1095.92	266.357	1247.28	1396.97	396.423	0	139.344	0	474.666	168.396	61.2069	137.308	412.841	575.843	31.8382	1070.53	67.0059	530.333	473.354	0	285.227	1093.87	465.859
4930579K19Rik	105.196	15.1685	61.3916	105.758	133.666	93.3798	109.329	42.0224	131.041	245.689	168.141	158.622	82.8087	0	0	0	0	0	104.905	156.179	0	92.0253	81.6111	131.546	41.73	124.625	36.3642	14.8895	0	0	280.636	1425.84	1.88302	0	227.929	156.689	691.638	116.395	1406.38	0	0	0	0	24.0585	455.921	0	0	210.528	109.265
4930581F22Rik	232.6	520.248	233.396	44.3199	302.649	102.718	1799.38	400.989	504.002	311.562	66.8514	4.80672	17.1328	509.36	144.767	1896.46	162.104	20.9053	395.871	96.4291	2018.98	339.638	13.7719	204.324	104.998	213.643	697.338	395.399	111.059	0	23.5499	108.707	1.88302	0	22.4813	87.3497	532.5	358.267	9.07344	252.381	0	0	76.5781	1592.05	619.517	42.6941	0	49.1233	859.827
4930583H14Rik	852.933	78.1527	4944.6	223.944	0.816346	0	0	0	0	0	0	0	0	1150.3	662.958	0.947284	0	0	6.81468	665.709	1.45565	0.294953	1.78524	0	0	0	0	0	0	0	0	0	0	0	0.890347	0.900512	0	8.80533	0	3783.84	0	0	0	0	0	0	0	403.074	0
4930588N13Rik	21.3545	1.5068	65.9892	0.937987	0	0	107.052	2.69531	3.78002	31.6013	0	1158.42	0	81.2384	262.211	0	0	0	0.206506	104.396	0	0.147476	0	0	0	0	0	104.227	0	0	0	0	0	0	5.56467	1.50085	0	1.10067	0	74.5245	0	0	0	0	0	0	0	23.2458	0
4930590J08Rik	10.7758	23.8075	69.2346	24.6222	13.4912	0	52.387	45.8203	20.7901	260.377	96.5632	0	68.5313	0	57.0441	112.727	0	0	41.5076	127.051	0	42.3257	17.0873	108.195	47.3837	0	0	0	0	0	0	0	0	0	31.9412	45.626	0	112.818	0	46.0298	0	0	0	1.04602	238.688	0	0	25.8774	122.236
4930592A05Rik	68.2688	0	58.9576	32.5951	9.83911	6.22532	48.7427	5.1456	0.420002	0.445089	0.675267	0	0	59.8074	225.3	0	0	5.97295	19.4115	41.3268	1.45565	5.45663	0	0	89.9214	1.22784	79.8587	0	0	0	0	0	0	0	78.5732	27.0154	0	11.2818	0	32.2522	0	0	0	11.5062	0	0	0	167.984	2.41833
4930592I03Rik	0	0	29.7493	11.0214	0	0	0	1.7152	69.3003	0.445089	0	0	0	0	0	0	0	0	0	11.203	0	13.8628	0	26.8541	0	0	0	0	0	0	0	0	0	0	5.1195	0.600342	0	1.37583	0	0	0	0	0	0	0	0	0	0	0
4930593A02Rik	2.62825	1.20544	0	2.57947	2.87869	0	0	55.989	0	30.7111	18.9075	0	9.51824	0	0	0	0	0	59.8866	5.06211	0	15.0426	0	0	3.76916	0	0	0	0	0	0	0	0	0	13.4665	7.50427	0	25.3153	0	0	0	0	0	8.36818	147.504	0	0	6.57901	0.439697
4930594C11Rik	9.85594	221.399	124.947	241.766	1326.39	52.9152	0	36.6317	78.5404	52.9656	24.3096	0	1.90365	0.99679	72.3837	772.984	250.755	0	238.101	25.8915	459.984	193.342	346.337	121.427	254.957	157.777	12.1214	6.61756	495.494	0	0	0	0	0	393.422	208.619	122.414	2031.28	199.616	0.939384	507.421	0	0	0	0	0	0	38.1583	29.8994
4930599N23Rik	263.022	708.096	146.853	122.407	1885.33	404.646	51.9315	7.96342	309.331	67.6535	20.258	0	59.0131	222.782	484.635	1438.93	0	707.794	553.228	156.013	58.2258	298.197	1.02014	87.5676	467.107	146.726	355.086	1.65439	0	1016.84	920.408	0	11.2981	0	10.3503	27.9159	12.2414	197.845	0	461.551	3.97977	170.602	0	50.2091	379.487	10.6735	0	190.791	514.885
4931402G19Rik	6.63633	0.100453	12.1701	4.68994	543.042	21.7886	0	0	0	0	0	0	0	0	0	0	0	0	0	3.81733	0	28.6104	6.6309	0	0.269226	1.84175	0	90.9915	0	0	0	0	0	0	2.11458	33.9193	0	47.879	0	0	0	0	0	0	0	0	0	0	0
4931403E22Rik	11.9585	0.30136	11.0884	4.22094	34.6732	0	63.7755	9.80114	62.7903	6.67633	15.5311	0	4.75912	0	0	0	0	0	0	9.46034	16.0121	37.9015	0	3.11351	0	0	0	0	0	0	0	0	0	0	4.56303	0	36.7242	1.10067	18.1469	0	0	0	0	30.3346	108.617	0	0	7.01761	105.088
4931403G20Rik	49.1483	76.6459	51.1146	158.051	107.887	0	53.2981	329.196	17.0101	103.261	114.12	331.663	134.207	21.431	67.1107	12.3147	0	0	20.444	36.0987	0	5.75158	61.4633	81.3406	27.461	22.101	0	19.8527	96.8206	0	0	0	0	0	26.2653	34.2195	12.2414	67.1406	9.07344	61.9994	99.4943	0	0	13.5983	231.983	0	36.9738	177.633	242.273
4931406C07Rik	1515.05	908.3	1700.3	6061.98	3950	2885.44	8077.16	2979.55	1306.63	4740.2	3025.2	2667.73	985.137	397.719	1237.71	373.23	268.485	259.823	2263.92	1751.82	314.42	3718.18	125.732	505.168	2445.11	1435.34	735.841	365.62	518.275	3535.19	1646.53	6939.58	118129	0	10434.6	3311.48	1799.48	47808.5	3053.21	974.142	157.201	68.2408	19.1445	19164.2	1772.73	672.431	3913.95	2382.04	1300.62
4931406H21Rik	655.288	708.699	901.673	704.663	1839.44	192.985	1080.99	413.73	1690.51	907.091	2329.67	0	711.012	925.519	702.745	3283.29	704.139	4258.71	1561.39	1070.1	1000.03	2053.76	446.055	283.719	913.752	972.446	824.969	397.054	5.69533	1149.89	777.146	7.58424	506.532	842.294	810.105	1067.11	30.6035	6918.78	1433.6	882.082	1627.73	0	698.775	143.305	2535.73	683.105	2123.36	2989.06	2912.33
4931406P16Rik	1799.56	16005.3	1983.46	1417.53	1913.04	1462.95	1709.18	7509.26	19138	2270.84	3604.57	2119.76	6901.67	2148.08	1281.82	22683.7	1950.31	2451.9	13724.4	2589.81	417.77	1658.82	552.66	1106.47	1315.98	4508	9173.77	3009.34	6905.59	779.263	12577.6	1504.21	1144.88	0	1049.94	991.164	1481.21	2177.67	499.039	2136.47	2560.98	55.4456	1828.3	992.675	23618.1	2518.95	1600.44	3121.08	17412.2
4931408A02Rik	676.512	401.311	604.721	604.298	0.515587	0	714.741	125.087	701.403	162.903	425.418	1148.81	1747.55	982.336	237.284	2030.03	0	0	1492	450.86	2.91129	15.9275	0	1.16757	0.807677	1464.81	3358.35	9.92634	1523.5	0	708.459	250.28	0	0	86.1411	100.557	0	236.643	77.1242	665.084	0	0	0	77.4056	4834.11	10.6735	0	1890.37	1924.99
4931408D14Rik	84.2354	14.2644	45.7057	13.8353	4.59731	18.676	11.844	20.2148	31.7101	30.7111	1.35053	0	1.90365	14.4535	34.0347	45.4697	32.9274	0	50.5938	135.349	8.73388	12.2405	9.69131	10.1189	5.11529	1.22784	11.4084	0	2.84766	665.225	158.962	0	5492.77	16.8459	17.6957	18.3104	538.621	22.5636	13.6102	10.9595	13.9292	0	14.3584	1214.43	46.9331	0	15.8459	25.0002	4.83667
4931414P19Rik	518.028	196.185	317.506	216.675	653.162	6.22532	126.184	288.888	64.0503	244.354	779.933	14.4201	996.559	0	0	0	0	0	835.934	296.341	0	176.972	23.9732	135.438	158.574	1311.33	1177.92	2511.36	461.322	1644.06	259.049	83.4267	376.604	0	563.924	449.656	55.0862	118.322	1583.32	0	0	0	67.0059	196.652	233.324	42.6941	0	380.705	623.051
4931417G12Rik	4.27091	0.100453	0.540895	19.6977	15.3817	34.2393	34.1654	0.122514	0	23.1446	4.0516	0	0	0	0	0	0	0	1.03253	10.3732	0	11.5032	0	1.55676	6.99987	0	0	0	0	0	0	0	0	0	42.2915	0	0	11.0067	4.53672	0	0	0	0	0	0	0	0	0	0
4931428F04Rik	102.896	87.294	100.336	250.677	167.437	3.11266	444.151	435.66	139.651	1528.88	1117.57	86.5209	819.52	85.7239	59.9203	178.089	0	0	63.1907	99.1676	563.335	17.6972	136.188	0	0	261.529	267.384	129.042	0	0	339.511	275.561	7.53208	724.372	491.472	372.512	24.4828	121.073	675.971	220.129	0	72.5058	0	125.523	413.011	0	221.843	634.217	173.021
4931429L15Rik	12.1557	31.6428	3.51582	7.97289	0	0	85.1858	4.41051	0	0	8.1032	0	0	0	0	0	0	0	15.0749	17.261	0	1.76972	0	0	3.23071	0	0	0	0	0	0	0	0	0	25.2636	22.5128	0	11.8322	36.2938	0	0	0	0	0	0	0	0	0	0
4931431C16Rik	70.3714	179.51	1263.26	48.7753	3067.83	1852.03	330.721	778.455	942.904	182.486	393.681	9.61343	124.689	114.132	587.698	2745.23	1339.89	286.701	1708.83	851.597	541.5	936.623	625.09	239.741	645.603	108.05	73.4415	1.65439	4499.31	9094.57	2260.79	0	303.166	0	649.397	525.299	0	571.245	190.542	446.521	519.36	0	0	11.5062	18.7732	1446.26	2588.17	281.582	598.867
4931440F15Rik	3.28531	85.5863	23.2585	7.97289	107.629	0	29.1545	42.2674	31.9201	309.782	24.3096	4.80672	5.71094	0	0	0	0	0	60.5061	23.4849	50.9476	27.5781	1.27517	1.16757	118.729	0	10.6954	19.8527	0	0	0	0	0	0	1372.69	8.40478	1211.9	302.958	0	0	0	0	0	6.27613	6.70472	0	0	0.877201	181.375
4931440J10Rik	22.6687	0	11.0884	6.33142	0	0	105.685	25.483	8.61004	43.6187	91.8363	0	0.951824	0	0	0	0	0	6.81468	20.3314	0	3.24448	0	0	0	0	0	16.5439	0	0	0	0	0	0	11.6858	12.307	36.7242	32.7448	13.6102	0	0	0	0	0	0	0	0	0	0
4931440P22Rik	282.734	38.775	777.267	389.968	167.652	379.745	242.347	111.978	107.731	74.3298	174.894	499.898	458.779	397.719	321.652	315.446	283.682	651.051	274.239	299.66	1.45565	530.915	635.546	252.195	323.071	28.2402	44.2075	59.5581	168.012	741.25	215.874	389.324	220.313	0	417.684	270.454	2032.07	383.582	294.887	262.088	304.452	72.5058	76.5781	58.5772	222.597	5.33676	1008.86	293.424	201.161
4932411E22Rik	0	0	0	655.184	0	0	15.9439	18.2546	0.420002	170.914	484.842	0	0	0	0	0	0	0	0	0	0	1.17981	0	0	0	0	0	0	0	0	0	0	0	0	0	8.10461	0	11.8322	13.6102	0	0	0	0	0	0	0	0	0	0
4932412H11Rik	22.603	20.5929	22.9881	23.6842	10.9133	0	5.01093	27.4432	0.210001	215.423	2.70107	0	1.90365	0	0	0	0	0	29.5303	10.3732	0	51.0269	0.765104	0	6.46142	0	0	8.27195	0	0	0	0	0	0	8.23571	27.6157	18.3621	32.7448	0	0	0	0	0	72.1755	100.571	0	0	149.563	0.219848
4932415G12Rik	641.556	564.749	597.149	507.217	1217.21	1970.31	1226.31	1244.5	536.973	2404.82	1050.04	1062.28	2180.63	1.99358	635.635	1788.47	309.011	0	633.559	510.775	10.1895	412.787	686.298	728.173	424.569	69.3727	621.757	1111.75	1899.39	617.709	60.8372	4755.32	0	2577.42	766.033	569.124	6683.8	331.576	957.248	108.969	449.714	12.7951	603.053	254.183	343.282	0	1272.96	1015.36	559.734
4932416H05Rik	866.6	74.2351	562.802	565.372	504.888	451.336	294.278	262.303	248.641	393.013	667.164	96.1343	718.627	900.599	487.512	1.89457	20.263	89.5942	259.371	804.793	0	313.093	26.7786	102.357	107.96	846.592	657.409	1029.03	811.584	0	461.185	1822.75	608.216	33.6917	359.366	543.909	801.811	423.206	167.859	283.068	0	4.26505	4.78613	291.84	68.3882	0	10.564	1024.13	808.383
4932425I24Rik	52.4336	0.502267	75.7254	17.8218	3.65207	3.11266	1619.44	0.245028	0.210001	12.0174	11.4795	490.285	158.955	0	0	0	0	0	2.68457	22.987	0	4.71925	0	0	0	0.613918	0	0	0	0	0	0	0	0	165.382	110.163	24.4828	173.63	1764.78	0	0	0	0	0	0	0	0	489.478	0.879394
4932438A13Rik	1866.85	2499.58	4368.54	2878.92	2535.18	2505.69	3699.89	3302.25	2837.32	8767.36	2272.95	3633.88	3814.91	5749.48	4002.2	4875.67	3041.98	2657.96	2269.08	2311.48	5048.18	2718.58	2713.57	6555.12	2848.95	5689.79	4652.48	5219.6	2540.12	807.773	5408.62	23635	2250.21	3605.02	2612.84	2205.05	5282.16	5088.38	2440.76	3727.48	3945.94	11929.3	5939.59	3904.8	9019.2	3698.37	3871.69	2837.31	3203.19
4932438H23Rik	204.544	0	97.3612	81.8394	0	0	1296.92	171.397	0	106.821	0	1091.12	0	55.8202	137.577	207.455	306.478	7576.68	0	121.242	0	284.63	0	452.238	173.112	0	0	0	0	0	0	0	0	0	894.688	410.333	2699.23	640.312	0	405.814	0	2102.67	3110.99	2.09204	1.34094	0	0	44.2987	0
4932441J04Rik	25.494	1.5068	132.79	64.9556	0	0	52.387	76.3263	2.73001	62.3124	112.094	81.7142	0	31.8973	54.168	0	0	0	4.33662	77.0935	0	3.09701	0.255035	1.16757	5.92297	1.84175	173.265	97.609	0	0	0	0	0	0	0	0	0	0	0	84.2315	0	0	0	0	0	0	0	14.0352	19.1268
4933400A11Rik	156.184	5.52494	13.7928	9.61437	0	0	0	0	0	0	0	0	0	0	397.871	0	0	0	2.89108	115.765	2.91129	0	0	0	0	0	0	0	0	0	0	0	0	0	74.9005	17.1097	0	142.536	90.7344	0.313128	0	0	0	0	0	0	0	14.0352	4.61682
4933400F21Rik	312.499	638.18	289.109	173.762	171.905	3.11266	395.863	1863.2	409.082	1733.62	850.161	100.941	305.535	1870.48	1184.03	1240	22.7959	355.39	396.491	667.037	0	264.13	0	0.389189	249.841	225.308	99.8234	28.1246	0	0	272.786	0	15.0642	0	425.364	734.218	2613.54	418.253	576.163	522.924	0	4.26505	0	20.9204	234.665	208.134	0	982.027	1203.67
4933403F05Rik	2824.97	1464.81	4117.3	5476.91	4023.81	2253.57	2663.54	2608.94	1047.69	4000.01	2823.97	696.974	3302.83	2446.62	3237.13	688.676	3148.36	722.727	1193.81	2789.39	1640.51	1272.13	1568.97	2439.05	1887.54	4619.12	3010.39	17680.5	1665.88	2347.29	3212.6	14078.9	12742.4	84.2294	3530.9	1883.57	905.863	1291.08	3774.55	2561.7	1074.54	3352.33	1459.77	8244.75	2408.34	266.838	1806.44	2535.11	2578.6
4933403G14Rik	551.998	784.742	189.043	327.123	2073.17	0	1322.89	1035.74	616.773	733.506	883.249	447.025	1388.71	178.924	325.008	654.574	63.3219	2.98647	151.369	267.711	0	218.708	159.397	167.351	562.682	520.602	1537.99	752.748	1725.68	0	0	0	0	0	230.377	277.958	201.983	827.976	0	82.0396	0	0	4.78613	24.0585	171.641	0	0	1525.01	467.398
4933404M02Rik	12.6813	13.7621	281.536	15.7113	0.214828	3.11266	411.352	0.245028	82.7404	110.827	292.391	0	0	0	0	0	0	0	124.11	17.344	0	0	0	0	0.269226	0	525.499	0	0	0	0	60.6739	321.996	0	41.0673	150.686	12.2414	15.4093	136.102	0	0	0	0	0	0	0	0	30.702	215.232
4933404O12Rik	141.663	8.43809	67.3415	29.7811	23.0295	305.041	183.582	411.648	276.361	443.754	1161.46	480.672	643.433	2.49197	115.047	463.222	0	0	344.864	248.624	336.254	85.6838	10.9665	10.5081	114.959	39.9046	0	0	5.69533	0	0	0	0	0	47.0771	16.8096	91.8104	400.092	0	2.50503	0	0	0	516.735	0	0	987.73	0.438601	107.066
4933405D12Rik	5.78215	1.40635	54.6304	28.6086	1.33193	3.11266	24.5991	0	0	10.6821	32.4128	370.117	3.80729	0	0	0	0	0	12.1838	18.2568	0	0.147476	0	1.55676	0.269226	0	0	11.5807	0	0	0	0	0	0	62.9921	103.559	0	334.602	0	0	0	0	0	0	0	0	0	0	0
4933406C10Rik	41.0664	20.2916	17.8496	37.9885	20.2368	0	38.7208	39.3271	6.30003	89.4629	18.9075	0	278.884	6.47913	62.7965	5.68371	0	0	16.7269	18.5058	0	9.43849	0	3.11351	3.49993	0	15.6865	44.6685	37.0196	0	0	0	0	0	509.613	718.309	12.2414	42.1005	208.689	0	0	0	0	0	0	0	0	7.01761	22.4245
4933406I18Rik	115.314	8.53854	199.861	26.9671	4321.09	1780.44	0	0.245028	0.210001	168.689	216.761	0	0	74.2608	40.7458	0	514.174	0	116.882	21.7422	566.246	33.0347	677.627	455.352	412.723	0	0	0	0	0	0	0	0	0	9.90512	0.600342	403.966	6.60399	558.016	243.614	1456.6	1177.15	880.648	362.97	164.936	0	211.279	165.791	52.1041
4933406J10Rik	13.2727	0	5.6794	40.568	281.124	0	53.7536	28.9134	0	14.2428	0	0	0	0	0	0	0	0	2.06506	19.7505	7.27823	53.6814	0	0	0.538451	0	0	0	0	0	0	0	0	0	12.91	1.80102	0	53.3823	27.2203	0	0	0	0	20.9204	132.754	0	0	0	0
4933407C03Rik	2970.91	9996.62	11953	15771.8	4343.86	7529.53	5294.28	9638.56	1206.88	10290	7305.71	7320.63	352.175	1396	9367.7	36638.1	2041.5	8601.04	18539.9	5016.97	4742.5	12448.9	3301.42	4950.49	7356.05	4585.35	11434.8	904.952	1284.3	11014.2	27847.7	8405.87	27126.8	6334.05	5714.92	6097.37	37275	23089.8	13732.6	4352.48	6743.72	4785.38	5384.4	2044.97	7727.87	17285.8	6982.77	4644.78	17775.8
4933407H18Rik	3778.37	4456.92	3423.06	2362.09	6444.58	5867.37	3144.13	1287.99	4495.7	1976.64	3294.63	1629.48	2990.63	4593.21	4111.01	3656.52	2441.69	1544.01	4930.94	4644.11	3046.67	2308.15	4938.23	2671.01	2169.15	3320.07	7065.36	559.184	2836.27	7079.89	4219.35	1367.69	1837.83	21427.9	2985	3945.14	728.362	3993.77	2291.04	2423.3	1973.97	558.721	2081.97	1027.19	2287.65	2257.45	2651.55	5370.23	7154.97
4933407K13Rik	479.787	462.487	183.904	137.884	636.664	239.675	747.995	468.127	443.102	366.308	737.391	9.61343	130.4	464.504	503.331	1379.25	0	0	308.932	247.961	36.3912	113.999	700.07	58.3784	115.498	634.177	681.651	61.2125	598.01	0	0	0	0	0	235.497	428.344	1175.17	715.433	671.434	284.32	109.444	0	43.0752	38.7028	422.398	0	338.047	921.939	372.423
4933408B17Rik	93.8942	146.762	6.49075	176.342	61.6126	96.4925	95.6632	18.7447	73.5003	277.29	29.0365	0	56.1576	19.4374	816.354	6.63099	113.979	98.5536	68.5598	608.2	132.464	279.173	45.9062	64.9946	98.8058	8.59485	110.519	16.5439	39.8673	0	641.734	513.2	0	4295.7	191.313	178.301	85.6897	31.6441	807.536	78.5952	19.8989	0	0	0	0	0	0	64.0357	366.487
4933408J17Rik	8.08187	2.8127	44.6239	22.2772	26.0371	9.33798	27.3323	2.69531	2.10001	13.7978	2.70107	0	55.2058	268.635	11.5047	2.84185	2.53288	2.98647	23.9546	4.48121	0	10.1759	2.04028	128.822	1.0769	3.06959	1.42605	1.65439	0	0	0	0	0	0	50.5272	22.813	18.3621	13.208	0	65.4438	0	0	4.78613	6.27613	10.7276	0	42.2558	0	20.6658
4933409K07Rik	56.6388	0.904081	2.43403	0	1.80455	0	3.64431	0.857599	1.89001	9.79196	0	0	2.85547	20.4342	6.23171	6.63099	0	0	1.03253	7.80063	0	0.884859	1.02014	1.16757	0	6.75309	0	1.65439	0	0	0	0	0	0	1.78069	1.80102	0	2.75166	0	23.4846	0	0	0	0	0	0	0	50.8777	2.19848
4933411K20Rik	1772.43	1143.36	1217.01	540.984	1893.96	1129.9	1185.77	732.39	1642.63	2759.11	1549.74	3629.07	1484.84	568.669	903.119	426.278	504.042	1397.67	832.837	1614.07	1842.85	904.031	1561.32	795.892	1063.44	305.117	1739.78	1373.14	891.319	285.096	1155.91	7495.76	2334.95	6519.35	1018.33	1001.97	3654.05	1425.64	1388.24	222.634	887.489	490.48	895.007	1354.6	1138.46	1227.45	438.404	1008.78	1082.09
4933412E12Rik	1620.58	1328.9	1893.4	72.225	865.541	606.969	31.8877	43.4925	263.551	255.926	270.782	153.815	0.951824	434.102	793.345	1383.98	2028.83	71.6754	922.46	1040.06	1.45565	842.091	82.6312	769.038	285.379	68.7588	375.764	89.3371	0	1140.39	251.199	2.52808	77.2038	0	67.1099	3.60205	0	6.05366	154.248	430.864	487.522	409.445	0	118.201	757.634	592.38	1817	2782.92	1393.62
4933413J09Rik	1.51124	59.6693	236.912	76.446	86.103	0	0	18.7447	14.2801	28.0406	155.311	0	57.1094	0.498395	193.662	0	0	0	168.922	192.111	0	344.8	1.02014	477.146	1.61535	0	0.713024	13.2351	0	0	0	0	0	0	75.7908	109.863	30.6035	32.4696	58.9774	111.787	0	0	0	0	0	0	0	41.6671	218.529
4933416M06Rik	0	0	0	75.508	0	0	0	0	0	0	0	0	0	0	0	0	0	0	0	33.6921	0	0	0	0	0	0	0	0	0	0	0	0	0	0	0.667761	0	18.3621	7.70466	0	0	0	0	0	0	0	0	0	0	0
4933416M07Rik	0	0.100453	14.3337	768.915	0	0	0	6.24822	179.761	12.9076	0	0	0	73.7624	0	0.947284	245.689	391.228	0	9.62631	52.4033	400.989	1.27517	186.811	5.92297	0	0	9.92634	0	0	0	0	0	0	303.052	806.259	110.172	668.654	190.542	8.45446	0	123.686	0	0	0	0	0	0	0
4933417D19Rik	36.0727	22.0997	36.7809	49.4788	96.6725	3.11266	92.4744	36.7543	6.93003	55.6361	0	0	0	0	67.5901	0	0	152.31	0	35.1028	0	42.0308	6.12083	0	37.9608	0.613918	0	9.92634	0	0	0	0	0	0	38.8414	52.5299	0	39.3488	145.175	13.1514	0	0	0	47.071	30.8417	0	0	74.1235	2.41833
4933421E11Rik	1923.02	2324.49	766.449	1450.13	3301.47	1319.77	833.181	1876.79	1297.81	1994	2743.61	1249.75	712.916	2028.47	686.926	948.232	2107.35	949.699	1806.1	1685.19	5169	2043.29	4557.72	2617.69	2188.81	2334.11	3042.48	1383.07	1176.09	2100.21	1098.99	6077.51	346.476	50.5376	1052.06	1105.53	556.983	1742.08	1170.47	1524.93	893.459	4090.18	2938.69	856.692	1766.02	2188.07	5889.41	1560.54	1379.33
4933421O10Rik	562.577	299.954	1134.8	217.613	1538.42	152.52	645.499	509.782	276.781	626.24	321.427	576.806	1482.94	741.612	705.621	32.2077	212.762	232.945	187.094	918.317	200.879	750.803	370.31	504.779	340.301	815.897	467.031	163.785	14.2383	788.766	590.709	0	645.876	0	403.773	1029.29	13710.4	439.991	3416.15	520.419	220.877	1531.15	52.6475	373.43	745.565	74.7146	290.509	864.92	732.755
4933424B01Rik	1629.98	2287.32	1927.75	1592.94	909.624	133.844	938.411	2019.52	1659.43	1241.8	3052.21	687.36	3209.55	3336.26	2576.09	3005.73	369.8	44.7971	2381.42	1476.98	3442.6	1016.26	2215.49	2243.29	1562.86	1365.97	3863.17	2321.11	4505.01	6414.67	1624.94	1875.84	2180.54	7664.87	1885.31	1630.53	2711.47	865.123	1646.83	4442.35	403.947	4265.05	2775.96	4540.78	462.626	266.838	0	1860.54	858.289
4933424G05Rik	0.657063	0.30136	0	37.9885	0	0	40.543	0.612571	2.73001	249.25	0	0	9.51824	0	56.0854	0.947284	0	0	0	0	0	0	0	0	0	0.613918	0	51.2861	0	0	0	0	0	0	2.55975	0	0	4.67783	0	7.8282	0	0	0	0	0	0	0	0	0
4933425H06Rik	13.9297	0.200907	18.12	0	0	0	3.18877	0	0.840004	0.890178	2.0258	0	30.4584	0	0	0	0	0	0	13.7756	0	0	174.954	0	0	234.517	0	19.8527	0	0	0	0	0	0	0	0	0	0	0	0	0	0	0	0	0	0	0	36.8425	0
4933426D04Rik	108.152	74.1346	259.089	92.3918	167.695	566.504	391.308	9.55611	192.361	186.937	289.689	105.748	306.487	34.8876	150.52	112.727	0	943.726	256.686	158.585	256.194	427.977	193.826	504	142.959	148.568	143.318	329.224	589.467	152.051	498.472	0	1478.17	33.6917	232.715	279.759	36.7242	152.442	231.373	156.251	165.16	0	0	114.016	99.2299	80.0513	0	376.758	429.144
4933426M11Rik	2395.65	5257.13	3222.11	1593.88	3156.72	1568.78	1311.95	1547.97	3853.73	1372.65	1045.31	5542.14	2708.89	2785.03	3612.48	4209.73	742.132	4844.06	3631.19	2567.57	2493.52	3805.48	2481.49	3555.63	3950.62	2627.57	4176.9	4794.42	575.228	10082.9	4009.37	467.695	3204.9	741.218	1175.7	1343.56	3029.74	12003.9	1955.33	4898.58	2161.02	4538.01	1981.46	1843.09	5952.45	4055.94	5440.44	3800.04	4525.14
4933427D14Rik	703.911	535.015	809.18	287.493	618.017	1024.07	1478.68	688.53	994.565	1483.04	409.212	201.882	696.735	293.555	731.986	342.917	980.223	618.2	830.772	794.586	302.774	389.485	268.551	708.325	401.685	748.98	248.133	420.215	159.469	380.128	906.67	15.1685	88.502	859.139	716.173	558.318	1885.17	1320.52	1274.82	161.887	0	375.324	880.648	724.893	480.058	58.7043	10.564	467.987	1306.78
4933427E11Rik	0.788475	77.4496	14.0633	47.6029	0	0	78.8083	4.77805	0	2.67053	99.2642	1297.81	0	0	0	0	0	0	0	0	0	0	0	0	7.80755	0	0	0	0	0	0	0	0	0	23.3716	25.2143	0	2.20133	0	0	0	0	0	0	0	0	0	0	0
4933427G17Rik	60.7783	0	27.5857	11.9593	48.9378	0	75.6195	567.976	96.3904	14.6879	0	0	0	0	0	0	0	0	98.0901	12.2818	0	58.6956	0.255035	0	171.228	34.3794	0	0	0	0	0	0	0	0	65.8857	200.814	208.104	73.1943	0	0	0	0	0	0	0	0	0	50.8777	228.423
4933430H15Rik	37.7811	41.0854	43.0012	20.8702	39.2276	0	293.367	6.73828	155.611	0	0.675267	0	97.086	0	0	0	0	0	169.541	99.4996	0	11.6506	1.53021	28.0216	1.0769	506.482	0.713024	0	441.388	0	0	0	0	0	33.388	6.00342	12.2414	114.194	612.457	0	0	0	0	0	0	0	0	252.634	115.86
4933430I17Rik	21.4202	0	3.78627	69.1766	0	0	32.7988	7.59588	30.0301	154.891	0	0	0	0	0	0	0	0	0	84.7281	0	3.53944	1.27517	0	0.538451	0	0	0	0	0	0	0	0	0	91.1493	61.8352	48.9655	23.3891	27.2203	0	0	0	0	0	0	0	0	0	0
4933431E20Rik	2342.03	283.078	100.607	9.14538	68.0574	12.4506	15152.1	9934.43	694.683	1757.21	3573.51	3561.78	421.658	135.065	331.239	0	0	2.98647	121.838	645.959	0	2.35962	0	21.0162	147.266	782.131	906.967	423.524	202.184	0	1.96249	32.865	3065.56	0	2065.27	4098.23	2442.16	8202.16	689.581	281.189	0	0	0	923.638	4.02283	0	0	280.266	17.5879
4933432B09Rik	132.464	229.737	60.8507	52.7618	96.4147	0	502.915	55.744	56.4903	820.299	23.6343	43.2604	0	185.901	26.3649	69.1518	0	0	52.2459	140.826	0	6.63644	1.27517	1.16757	14.269	28.2402	213.907	0	0	0	0	0	0	0	98.1608	77.7442	1407.76	59.1608	385.621	8.14133	175.11	0	0	12.5523	26.8189	0	0	147.808	156.532
4933433C11Rik	0	0	28.397	0	0	0	0	0	0	0	0	0	0	0	0	0	0	0	81.7762	71.2845	0	15.6325	0	0	0	0	0	0	0	0	0	0	0	0	10.1277	2.40137	6.12069	20.0871	0	0	0	0	0	0	0	0	0	0	0
4933433G15Rik	31.4076	61.9797	259.63	11.7248	217.019	71.5912	183.127	27.3207	51.6602	166.463	58.7482	0	0.951824	0	0	0	0	0	115.643	41.6587	0	799.617	36.2149	236.238	248.765	12.8923	0	0	0	0	0	0	0	0	161.598	155.789	0	150.241	217.763	0	0	0	0	0	0	0	0	46.4917	2.85803
4933433G19Rik	72.2112	84.0795	74.6436	103.648	163.054	164.971	151.695	65.6676	106.89	97.9196	189.075	0	18.0846	112.637	172.57	50.2061	22.7959	0	85.9063	75.1018	0	50.142	2.55035	114.422	51.1529	0	178.969	3.30878	0	133.045	162.887	0	37.6604	0	54.6451	49.8283	97.9311	54.2078	163.322	32.5653	53.7269	25.5903	138.798	7.32216	185.05	5.33676	31.6919	82.0183	64.4156
4933433P14Rik	6947.78	7174.88	3340.57	3240.51	4432.97	1575.01	5398.14	3529.39	5372.46	6419.52	2245.94	6849.57	4216.58	2741.67	3425.52	3252.97	3558.69	2962.58	6078.7	4196.08	3981.19	2547.21	2531.73	2018.34	4386.23	3335.41	5364.08	3763.74	296.157	4590.05	1199.08	4004.48	2647.53	4464.16	1862.72	3246.95	2668.62	4992.07	4237.3	1292.28	5888.07	1833.97	3053.55	2302.29	2166.97	8923.06	8572.65	4818.47	4455.23
4933434E20Rik	15457.8	15266.6	14949	26823.2	23468.8	20126.5	14107.6	26639.7	12318.7	8485.62	17242.9	9382.71	7816.38	25801.9	16899.9	16201.4	37225.7	32695.9	18062.2	15821.5	26494.2	17549.3	31130	15914.3	12839.1	6375.53	21401.4	39028.7	13497.9	18607.3	16192.5	18960.6	15237.4	15346.6	13510.4	23668.2	8342.5	10929.9	9277.59	15819.9	31332.7	18275.7	6025.74	18896.4	10087.9	9744.92	8387.78	17779.6	21605
4933439C10Rik	617.047	408.444	641.232	228.165	601.131	136.957	1028.15	136.481	568.893	462.002	623.271	0	520.648	710.711	367.192	1015.49	0	29.8647	382.448	474.096	0	148.509	243.558	34.2487	162.074	419.92	3592.93	570.765	0	0	370.911	0	75.3208	16.8459	335.216	191.509	61.2069	219.858	108.881	422.723	1026.78	4.26505	0	274.058	891.728	0	755.323	944.746	369.565
4933439F18Rik	7083.33	3928.33	6142.68	2245.07	2175.43	3439.49	4082.54	5528.82	4208	5192.41	4905.14	13886.6	9893.25	6906.26	6143.03	3988.07	2054.16	1609.71	3569.45	5125.02	4509.59	1584.49	4919.11	4086.49	2156.5	4561.41	4919.87	8832.79	9707.69	1634.55	3976	1552.24	6654.59	2510.03	5620.1	3851.49	391.724	2081.63	2971.55	3514.55	5265.24	985.226	1603.35	5713.37	2172.33	2977.91	1225.42	4068.9	4325.52
4933439K11Rik	6.57063	70.7192	28.9379	78.3219	100.368	0	2.73323	43.6151	74.3403	4.0058	0	0	0	0	0	0	0	0	7.22769	11.452	18.9234	95.1223	17.3424	0	151.843	49.7273	0	0	0	0	0	0	0	0	178.737	191.209	0	125.476	176.932	0	0	0	0	0	0	0	0	0	23.5238
5031410I06Rik	0	0	83.8388	0.234497	0	0	33.7099	215.135	0	1.33527	13.5053	0	0	0	0	0	0	0	0	0	0	0	0	0	0	0	0	0	0	0	0	0	0	0	0	0	0	0	0	0	0	0	0	0	0	0	0	0	0
5031414D18Rik	2.75966	3.0136	214.465	3.51745	7873.4	5764.65	9.11078	9.80114	0	0.445089	1.35053	0	0	1.99358	1.43809	3.78914	349.537	444.985	0.413011	61.9901	0	1773.11	6714.3	257.643	1387.05	2.45567	0	297.79	0	3696.75	0	5.05616	9.4151	2392.11	15.5811	4.80273	0	45.1273	58.9774	2.50503	2839.57	8.5301	9.57227	46.025	1185.4	1158.08	5540.79	0.438601	13.4108
5031425E22Rik	719.812	1753.21	612.835	644.866	1059.83	479.35	601.312	385.43	1720.33	804.276	565.198	648.907	842.364	1007.75	784.237	1128.22	762.395	537.565	1777.6	994.83	841.363	1215.35	1828.85	1134.88	981.059	1262.83	999.66	408.634	3291.9	1045.35	1409.07	591.571	2071.32	1111.83	1037.81	1060.2	6022.76	2131.99	2481.59	1191.45	2558.99	1224.07	674.845	525.103	923.911	298.858	1331.06	978.079	1211.15
5031426D15Rik	3735.79	9.54307	1970.21	547.55	1.58973	3.11266	823.615	77.0614	1.26001	3520.21	1148.63	0	10.4701	425.629	9179.31	228.296	0	113.486	9.08624	7404.38	5.82258	1.03234	0.510069	2.72433	153.997	195.226	43.4945	410.289	0	0	0	0	0	0	9.68253	6.00342	575.345	44.3018	512.649	809.436	0	17.0602	0	0	0	0	0	10218.5	54.3026
5031434O11Rik	17.0836	0.30136	22.7176	17.5873	49.0237	0	54.2092	30.3835	57.3303	91.2432	105.342	0	3.80729	0	2.87617	0	0	0	178.834	188.46	0	45.7177	123.692	15.5676	0	136.904	0	0	2.84766	0	0	0	0	0	62.1017	70.5401	0	46.5031	195.079	23.7977	1.98989	68.2408	0	0	0	0	0	21.0528	1.09924
5031439G07Rik	1126.27	862.292	1530.73	2388.35	2750.53	14937.7	7305.94	36251	1611.76	1232.9	4040.8	2090.92	439.743	766.033	1156.7	1989.3	711.738	9607.49	719.259	1306.69	302.774	10425.7	2063.74	165.016	9570.44	911.054	1317.67	1156.42	1170.39	4200.42	1587.65	2212.07	3203.02	0	1431.34	688.892	4431.38	1370.6	1388.24	922.789	3269.38	545.926	1062.52	1164.22	348.646	10017.1	1684.95	1100.89	878.954
5033406O09Rik	104.67	1004.84	180.93	40.568	0.300759	3.11266	0.911078	181.076	1026.48	43.1736	0	0	0	0	0	0	0	0	537.534	27.3852	0	203.96	1.53021	90.2919	141.344	0	904.115	1.65439	2.84766	0	1173.57	0	3.76604	0	2073.29	4275.33	6010.52	3130.02	898.27	0	0	0	0	1860.87	0	1563.67	0	0.438601	1519.81
5033411D12Rik	164.397	69.8151	136.847	641.114	64.2335	0	2432.58	1447.38	123.061	87.6825	544.265	5873.81	629.155	48.8427	167.777	9.47284	0	0	40.0621	267.545	24.746	114.737	48.2015	42.8108	18.3073	4.91134	233.159	218.38	0	9.50321	9.81245	3301.67	26859.4	0	190.868	244.039	716.121	681.312	476.356	27.5553	161.181	55.4456	0	11247.9	470.672	0	0	166.668	188.19
5033414D02Rik	2811.31	1904.09	3621.3	2887.36	2775.83	392.195	3505.83	1647.08	1620.79	1897.41	4520.24	3653.1	1417.27	2228.82	3042.51	2179.7	11833.6	5444.34	2851.02	3369.04	4889.52	3341.82	6589.84	2743.79	2462.07	2461.81	2031.41	3075.51	1514.96	1625.05	2563.01	310.954	2029.9	555.914	9072.08	18851	8385.35	25358.2	6260.67	1629.83	13545.2	3296.88	1991.03	711.295	1306.08	4808.42	2276.53	1874.58	2068.99
5133401N09Rik	4006.77	5947.44	2580.88	2040.59	4453.81	3268.29	3082.18	2166.17	3211.12	2492.94	2062.94	442.218	3409.43	1800.7	3383.82	5097.34	8905.59	1576.86	5038.53	3093.03	6960.9	3943.67	6040.75	7124.89	3518.24	3379.62	4207.56	2496.48	5971.55	7678.59	4199.73	3544.37	3758.51	9804.3	3985.08	4215.9	8960.69	10811	4250.91	1908.52	5967.67	8150.51	7983.27	10935.1	3116.36	5427.48	2424.43	3749.6	8042.06
5330417C22Rik	14.8496	3.31496	63.0143	577.331	30.2478	3.11266	5.46647	11.0263	4.62002	3254.93	222.163	0	16.181	127.091	35.4728	12.3147	15.1973	8.95942	180.073	270.865	8.73388	14.0103	2.55035	8.17298	4.03839	2.45567	4.27815	3.30878	0	731.747	410.16	32.865	1.88302	0	17528.2	70256.2	5018.97	4653.61	51877.4	14.0908	37.8078	0	4.78613	32.4267	10.7276	10.6735	0	21.0528	7.255
5330426P16Rik	3135.5	2508.82	938.183	69.8801	1158.87	1413.15	712.463	2672.4	2316.94	599.09	97.9137	403.764	4998.98	1333.21	1943.34	1341.35	149.44	1099.02	1424.47	1975.8	941.803	649.339	802.594	263.092	1094.13	4806.36	3750.51	1517.08	2018.99	1178.4	2437.41	477.807	0	1549.82	93.0413	62.7357	18.3621	97.9592	485.429	535.449	439.765	3458.95	325.457	49.163	2074.44	2390.87	242.971	3244.77	1736.8
5330437I02Rik	0.197119	0.200907	73.5618	105.289	0	0	38.2653	96.9087	0.210001	203.851	0	0	63.7722	0	0	0	0	0	0	0	0	0	0	0	0.269226	426.673	0	0	0	0	0	0	0	0	145.349	14.7084	0	56.9594	54.4406	0	0	0	0	0	0	0	0	0	0
5430402O13Rik	146.591	47.8158	22.7176	196.274	219.081	127.619	418.185	107.445	110.671	133.527	89.8105	0	48.543	139.551	158.19	0	58.2561	0	48.1158	43.4844	0	44.6854	63.5036	253.751	138.92	0	166.135	489.7	68.344	0	0	0	0	0	99.9415	54.0307	55.0862	86.6774	63.5141	56.6762	0	0	0	355.648	42.9102	0	0	382.021	59.1392
5430405G05Rik	9.06746	0	9.73612	60.0312	0	0	264.213	0	0	1010.35	258.627	384.537	0	0	0	0	0	0	0	51.8659	0	0	0	0	0	0	0	1047.23	0	0	0	0	0	0	12.3536	6.30359	1487.33	22.2885	31.757	0	0	0	0	0	0	0	0	0	0
5430405H02Rik	713.57	954.106	568.752	283.507	1547.92	927.573	1329.72	654.348	837.274	1559.15	1320.15	447.025	1366.82	690.775	341.785	367.546	3041.98	173.215	864.432	463.391	1174.71	672.64	1661.55	450.292	563.489	321.693	928.358	41.3598	435.693	2774.94	2366.76	0	135.577	3638.71	873.208	624.655	8868.88	843.66	548.943	559.56	1004.89	38.3854	875.862	253.137	218.574	74.7146	47.5378	1501.33	826.41
5430407P10Rik	390.229	95.3303	148.746	6033.6	67.4559	0	582.179	181.076	19161.5	322.689	566.549	24.0336	1056.52	479.456	110.733	4.73642	27.8616	2.98647	552.196	83.2344	0	123.733	0.510069	1.94595	76.1909	0	720.868	550.912	0	0	213.911	3387.63	126.162	0	3020.39	2626.19	624.311	748.177	1429.07	20.6665	0	0	14.3584	6633.87	0	0	644.401	904.394	366.268
5430411K18Rik	699.772	358.719	506.549	828.946	758.256	230.337	1298.74	587.701	418.742	1112.72	532.11	259.563	842.364	355.356	346.579	34.1022	2.53288	35.8377	261.849	654.257	2065.56	739.152	725.573	880.346	704.833	851.504	406.424	597.235	207.88	1872.13	859.57	5.05616	2749.21	0	416.794	947.039	5520.87	1651.27	1306.58	371.37	1468.54	2401.22	545.619	1384.93	2455.27	341.552	84.5116	1237.29	532.033
5430416N02Rik	178.852	123.558	1185.37	1999.09	161.379	0	80.6304	516.152	850.714	648.494	301.169	168.235	374.067	1007.26	720.961	548.478	217.827	391.228	689.522	577.828	339.166	422.078	376.431	610.638	130.574	22.101	166.135	29.779	54.1056	0	533.797	442.414	79.0869	3790.32	1070.09	1379.28	2240.17	252.052	1088.81	1353.65	877.539	2281.8	0	1531.38	0	0	581.018	127.633	273.492
5430416O09Rik	1150.32	6949.77	302.361	0	0.77338	0	108.418	1.34766	8383.03	2.22544	0	24.0336	370.259	0.498395	273.237	5787.91	0	0	14471.1	657.162	0	0.884859	4.08055	0.389189	41.4608	5686.72	1969.37	559.184	0	0	3234.18	0	0	0	1.11293	1.50085	6.12069	12.6577	4.53672	0.313128	0	0	0	0	0	0	0	2410.99	543.465
5430417L22Rik	5506.12	6388.43	6024.76	23205.8	11019.3	6847.85	5459.64	6024.51	6400.62	16198.6	6972.13	11031.4	17722	15327.1	3070.32	20099.5	141.841	5435.38	10022.1	4541.63	7474.74	4587.85	9213.12	4129.69	3898.66	14286.5	8629.74	18107.3	27679.3	6034.54	15103.3	22545.4	4344.13	10461.3	7668.9	15671	12982	5167.9	10457.1	11975	4035.49	1437.32	4073	4012.54	12198.6	5198	8651.88	15558.5	43997
5430427M07Rik	0.459944	0.100453	2.16358	138.119	0	0	2.73323	17.0295	0	12.4625	1.35053	0	0	125.596	0.479362	0	0	0	0	5.39405	0	27.4306	0	11.6757	8.346	0	0	0	0	0	0	0	0	0	23.149	105.66	0	3681.18	0	51.0399	0	0	0	0	0	0	0	2.6316	2.41833
5430428K19Rik	22.5372	14.4653	0	58.6242	0	0	0	0	0	0	0	0	0	0	0	0	0	0	0	0	0	0	0	0	0.269226	112.347	29.234	0	0	0	0	0	0	0	0	0	0	0	0	0	0	0	0	0	0	0	0	0	0
5430435G22Rik	10511.9	78.0523	10975.3	178.687	108.961	7193.36	1243.17	1121.13	6.30003	175.81	125.6	24.0336	222.727	760.052	14615.8	115.569	7.59863	85825.3	24.9872	17227.9	13.1008	21127.8	14.0269	14.7892	29840.2	2672.38	4.27815	289.518	2.84766	43667.3	141.299	27.8089	3334.83	0	7.01149	3.00171	42.8449	19.5368	0	1247.82	3468.37	0	0	4.18409	6.70472	3655.68	1093.37	8275.96	16.4886
5430437P03Rik	6277.31	7733	6514.82	5965.37	4310.18	4037.12	5401.78	6566.39	7378.59	6816.09	6016.63	11151.6	7719.29	6539.44	5236.55	5904.42	9305.78	5952.04	7613.86	5591.56	11207	6344.59	6269.26	9246.75	6271.61	7292.73	9573.07	12070.4	5934.53	2755.93	4737.45	4914.59	17898.1	5474.91	6781.78	5561.86	1793.36	8336.17	6138.18	4121.39	3685.27	6350.66	8538.46	13541.8	10298.5	13662.1	6877.14	4383.37	6977.99
5530601H04Rik	1952	668.718	1585.64	431.474	1276.51	983.601	616.8	1259.57	967.265	1982.43	1493.69	793.108	890.907	1548.01	1173	372.283	448.319	220.999	999.487	1262.21	3241.72	876.895	534.552	475.589	997.481	2246.32	1728.37	360.657	0	2223.75	1369.82	343.819	382.253	0	563.479	718.309	6.12069	275.717	303.96	1072.46	1585.94	8.5301	95.7227	820.081	99.2299	1915.9	0	1251.33	1459.79
5730403B10Rik	7479.8	5199.07	2585.21	3172.27	7418.09	3535.98	21749.7	40044.9	7319.58	19406.3	18059.3	15785.3	10196.9	6140.22	4425.95	3006.68	1909.79	5202.44	4693.46	5850.06	4013.22	3257.9	4251.68	2772.2	5063.06	7353.51	8683.92	10828	8850.54	3240.59	11621.9	7245.48	6622.58	4683.15	3011.49	2349.74	238.707	2451.18	2781.01	7721.74	3157.95	4810.97	856.718	9799.14	8925.33	10107.8	4600.6	6113.22	4528.22
5730405O15Rik	63.8008	214.669	9.73612	54.6378	323.144	168.084	639.121	86.3725	252.631	1253.82	131.002	562.386	181.798	0	22.53	0	0	361.363	111.513	29.6258	149.932	46.3076	33.9196	323.806	74.8447	316.781	398.581	107.535	657.811	0	335.586	15.1685	124.279	0	45.4077	31.2178	281.552	59.4359	9.07344	6.57569	413.896	63.9757	67.0059	107.74	119.344	5.33676	126.767	319.74	80.2447
5730408K05Rik	49.2797	34.8573	48.4101	52.2928	136.802	108.943	40.0874	66.7702	79.3804	57.8616	195.152	0	6.66277	161.48	69.5075	125.042	68.3876	1057.21	229.015	53.3596	222.714	73.7382	345.062	461.189	46.576	19.6454	15.6865	21.5071	2.84766	0	0	0	0	0	337.664	98.7562	177.5	141.711	1120.57	324.088	3096.26	106.626	569.55	108.786	1.34094	0	89.7936	9.64921	71.4508
5730409E04Rik	7822.99	3238.82	5196.65	404.976	3301.04	890.221	4123.54	5166.18	4109.72	13713.6	3086.64	11790.9	5110.34	637.945	2877.13	1004.12	782.658	238.918	2448.12	4895.15	307.141	809.351	2.55035	4.28108	2370.53	5393.27	6485.67	3255.84	4168.98	1786.6	3856.29	5.05616	1237.14	0	303.275	215.222	36.7242	28.067	793.926	600.893	0	652.552	1531.56	1155.85	3081.49	6286.7	0	4710.13	2133.63
5730419I09Rik	967.065	935.322	507.901	562.089	458.314	2188.2	1314.23	2571.33	561.753	3426.29	2251.34	43.2604	1718.04	338.41	1073.77	215.034	1000.49	1302.1	868.356	892.177	1093.19	1405.89	1277.98	1268.76	1187.55	710.917	1384.69	904.952	2286.67	9.50321	716.309	1501.68	485.819	0	1137.2	1008.27	7246.9	1496.91	1302.04	562.691	376.088	290.023	1483.7	502.091	974.867	37.3573	1727.21	617.111	281.626
5730420D15Rik	238.119	24.7115	88.7069	14.0698	0	0	0	0.122514	88.2004	206.966	2.0258	0	4.75912	0	35.4728	369.441	0	0	120.186	61.6582	10.1895	38.1964	0	70.4433	16.9612	1.84175	0.713024	72.7932	0	0	0	0	0	0	285.69	150.085	911.983	191.241	208.689	9.08072	0	0	0	284.518	0	0	0	69.7375	22.2047
5730422E09Rik	10.3816	8.23718	23.2585	10.5524	40.4306	3.11266	7.74417	3.67543	2.94001	37.3875	2.0258	9.61343	32.362	0	0	0	0	0	8.46673	0.746869	0	44.2429	0	28.8	6.73064	0	0	0	0	0	0	0	0	0	7.67925	26.415	0	29.4428	18.1469	0	0	0	0	0	0	0	0	8.77201	19.7864
5730435O14Rik	0	0	33.5355	0	123.655	37.3519	0	0	0	0	0	0	0	0	0	0	0	0	0	0	0	0	0	0	0	0	0	0	0	0	0	0	0	0	12.4649	59.734	0	3.85233	0	0	0	0	0	353.556	0	0	0	0	0
5730437N04Rik	5139.67	2183.05	5027.08	2210.6	1456.27	1992.1	5304.75	4130.69	4399.73	3411.16	3474.92	5450.82	4328.89	2772.07	3853.59	2072.66	5162	3470.28	3868.88	4725.27	915.601	2857.65	1826.3	1200.26	2751.76	3115.02	4737.33	7390.16	5538.71	2622.89	2386.39	9012.61	7503.84	0	3773.85	4637.34	6028.88	2423.39	1356.48	2200.98	815.853	1578.07	842.359	5638.06	3093.56	2417.55	2878.68	3429.42	4146.78
5730455O13Rik	1337.06	936.628	1195.38	1247.52	1674.84	463.787	1520.59	1108.88	1405.54	2881.95	948.75	1475.66	1380.14	681.804	858.538	1365.04	1585.58	298.647	1819.93	1326.69	1106.29	643.44	882.93	787.719	1153.9	1725.72	1410.36	2154.02	2261.05	1786.6	465.11	634.548	2103.33	0	1397.07	2048.37	3164.4	1369.5	2109.57	574.277	1772.99	98.0961	402.035	4046.01	993.64	0	929.628	1388.17	1985.45
5730455P16Rik	2505.77	1724.38	3189.66	369.567	2948.55	1671.5	8687.13	7151.28	1690.72	6557.49	4406.12	7753.23	2506.15	1732.42	2659.98	215.034	1390.55	1152.78	1336.3	2620.27	689.976	1190.43	534.042	1024.35	1582.78	1857.1	2089.87	3080.48	583.771	1929.15	3124.28	4373.58	2312.35	67.3835	1204.19	1041.59	55.0862	679.386	471.819	1613.55	1201.89	1194.21	3039.19	2787.65	1811.62	1579.68	1410.29	2122.39	1836.17
5730457N03Rik	0	0	169.03	0	0	0	0	0	0	0	0	0	0	0	0	0	0	0	0	0	0	0	0	0	0	0	0	0	0	0	0	0	0	0	4.22915	0	0	17.8858	58.9774	0	0	0	0	0	0	0	0	0	0
5730469M10Rik	3488.15	139.329	1192.13	7000.2	835.207	3399.03	77820.7	16097.6	3165.34	3968.41	25761.4	153820	1059.38	392.735	1052.68	225.454	2375.84	2078.59	1380.7	1283.29	540.045	1009.03	4605.67	808.346	2245.07	422.989	2018.57	5755.62	694.83	1339.95	2262.75	3096.9	30602.8	202.15	2210.4	2844.42	3146.04	714.882	7698.81	348.825	5818.42	46.9155	28.7168	16212.3	524.309	53.3676	2530.07	3067.13	1592.14
5730480H06Rik	77.9276	60.8748	13.5224	28.1396	185.998	647.434	180.393	44.8402	58.1703	103.261	129.651	129.781	0	0	0	0	0	0	401.447	42.6545	0	18.2871	0	35.8054	21.5381	93.9294	14.2605	49.6317	643.572	0	0	0	0	0	73.0085	30.0171	269.31	124.1	27.2203	0	0	0	0	69.0375	434.466	0	52.8198	210.528	462.781
5730494M16Rik	3552.41	6104.95	3469.57	1511.1	1753.6	445.111	7204.35	4843.35	7415.34	5617.02	6720.93	9661.5	1992.17	1252.47	2899.18	3714.3	3044.52	1845.64	4093.77	3087.72	2228.59	1456.92	2252.72	3835.85	2536.64	2576.61	1990.05	4035.06	9773.19	47.5161	3249.88	6560.37	2805.7	0	1216.33	1209.69	4535.43	501.904	1120.57	936.879	5090.13	264.433	2622.8	2708.15	1556.84	3730.39	100.358	2501.78	7037.79
5730494N06Rik	5736.29	3247.56	5097.13	7156.84	9423.38	7364.56	6353.4	5531.88	3459.35	5710.05	5856.59	6109.34	1812.27	6813.56	5509.31	1150	4531.31	5659.37	3219.21	5889.64	7051.15	6054.79	3920.39	5527.27	4493.92	4303.56	4713.8	5472.72	2486.01	10196.9	49774.6	5298.86	1856.66	1903.58	3880.25	6886.22	110.172	3780.51	5058.44	3954.18	4445.4	2780.81	5901.3	8119.22	4230.68	4915.15	3047.7	5375.05	4111.61
5730507C01Rik	245.61	31.6428	200.131	505.81	52.6328	448.223	15.0328	17.642	39.9002	87.6825	86.4342	0	145.629	17.9422	22.53	71.9936	0	8.95942	35.932	472.768	64.0484	19.0245	23.9732	42.8108	27.461	143.657	44.2075	11.5807	37.0196	0	47.0998	2.52808	1.88302	16.8459	324.086	92.7528	91.8104	324.972	172.395	13.4645	3.97977	21.3252	33.5029	66.9454	26.8189	21.347	5.28198	192.984	27.0414
5730508B09Rik	139.757	1670.84	178.225	2786.76	256.032	1332.22	285.623	1090.62	1388.53	876.38	462.558	0	10112.2	422.639	436.699	3507.79	3470.04	615.214	1939.09	87.1347	318.786	1395.86	754.392	6664.87	1027.1	1752.12	1254.21	223.343	4299.97	1729.58	945.92	93.539	24.4793	0	1715.7	1283.23	1187.41	1091.86	1733.03	754.326	1048.67	7502.22	1282.68	279.288	1000.34	2316.15	353.893	920.623	1863
5730522E02Rik	0	0	2.70448	28.6086	26.8964	3.11266	3.64431	11.6388	1.05	601.76	126.95	0	1.90365	0	0	0	0	0	0.206506	9.1284	0	35.6893	0	0	0	0	0	0	0	0	0	0	0	0	56.5371	33.0188	0	24.765	9.07344	0	0	0	0	56.4852	0	0	0	0	0
5730528L13Rik	920.019	804.23	950.894	1418.94	5.97221	0	2672.65	841.06	1332.04	1214.65	1873.19	418.184	844.268	1411.95	1360.91	423.436	0	2.98647	402.273	958.565	8.73388	225.492	3.57048	0.778379	98.5366	1555.67	76.2936	1275.54	993.835	0	1100.96	2093.25	0	0	290.587	306.174	18.3621	4.953	639.677	821.648	0	0	368.532	71.1295	934.639	416.267	0	1437.29	1228.51
5730559C18Rik	0.854181	0.60272	6.49075	6476.57	1.97642	0	17.766	243.436	4.20002	36.0522	7079.5	0	0.951824	0	1.43809	0	0	0	0.413011	3.31942	0	1.47476	3.57048	1.16757	0.807677	0.613918	0	0	0	0	0	83.4267	5916.45	0	6245.01	6511	3097.07	11008.3	1002.61	0.939384	0	0	14.3584	4.18409	0	0	0	0	1.31909
5730577I03Rik	240.025	206.934	23.7994	103.882	240.564	0	170.372	47.0455	168.841	468.679	486.867	86.5209	85.6641	81.7368	140.453	63.4681	164.637	0	363.45	149.789	751.113	78.1625	135.933	35.4162	48.9991	305.117	22.8168	86.0283	432.845	0	0	0	0	0	189.867	149.485	24.4828	117.496	49.9039	73.272	390.018	0	0	29.2886	85.8205	0	385.584	162.282	73.4294
5730590G19Rik	45.3373	0.30136	95.1976	14.5388	33.5991	1061.42	167.183	61.1346	0.840004	436.632	218.111	543.159	0	0	0	0	0	0	4.33662	53.9405	0	121.521	354.243	104.692	80.7677	5.52526	0	0	0	0	0	0	0	0	971.703	57.933	446.811	67.4158	0	0	0	0	512.116	2.09204	18.7732	0	47.5378	0	324.936
5830415F09Rik	1241.78	1098.26	332.921	461.255	2295.82	3037.96	594.479	859.07	1266.1	379.661	761.701	302.823	345.512	1030.68	653.371	32.2077	3811.98	1615.68	833.043	696.165	4119.48	1259.45	1987.74	1184.69	1657.89	2060.31	600.367	416.906	2224.03	0	131.487	3921.05	1393.44	6788.89	1450.82	1020.88	0	259.207	485.429	1146.05	2117.24	46.9155	1924.03	932.006	1409.33	5.33676	1611	617.988	893.904
5830416P10Rik	6.96486	0.30136	5.13851	319.619	39.5283	933.798	191.782	15.1918	0	35.162	0	0	0	0.498395	0.479362	0.947284	3158.5	2.98647	2.47807	0.663884	4611.49	1232.31	2998.19	718.833	249.572	149.796	1.42605	72.7932	0	0	0	0	0	0	51.974	16.5094	153.017	421.83	81.6609	145.291	2893.29	1087.59	2077.18	0	159.572	48.0308	1177.88	32.895	2.19848
5830417I10Rik	1086.98	463.392	1058.53	578.738	1339.71	2599.07	1793.46	4410.63	501.272	2739.97	2629.49	817.142	1479.13	1160.26	929.963	238.716	225.426	62.716	874.344	985.618	302.774	966.118	908.178	542.141	1297.4	915.965	991.817	1778.47	805.889	446.651	1838.85	2568.53	323.879	168.459	1171.47	754.93	2105.52	946.848	1134.18	567.701	648.703	162.072	363.746	564.852	1063.37	832.534	1632.13	1105.71	1668.21
5830418K08Rik	331.554	420.096	389.174	471.573	785.024	1017.84	639.577	545.433	635.673	1549.35	870.419	571.999	831.894	691.274	620.295	453.749	1897.12	331.499	471.246	484.054	802.061	662.464	782.191	654.617	507.221	647.683	618.192	815.615	2884.68	836.283	794.808	101.123	583.736	16.8459	1212.32	573.026	330.517	572.346	2463.44	524.803	2539.09	1066.26	2187.26	584.726	1178.69	816.524	375.02	409.653	394.188
5830418P13Rik	0	0	0	78.0875	0	0	0	161.229	0.840004	14.6879	10.129	0	0	0	0	0	0	0	2.06506	0.165971	0	27.7256	3.06041	0.778379	0	0	0	0	0	0	0	0	0	0	2.44846	0.600342	6.12069	3.02683	22.6836	0	0	0	0	0	0	0	0	0	0
5830428M24Rik	0.0657063	2.8127	9.19522	19.2287	7.13228	155.633	0.455539	0.245028	15.9601	0	0	0	0	0	1.91745	0	1838.87	77.6483	0	15.2693	733.646	654.943	1487.62	920.433	502.375	0	0	0	0	0	0	0	0	0	268.996	621.053	556.983	323.045	1029.84	11.5857	2348.06	81.0359	1603.35	0	0	1488.96	1325.78	0	0.659545
5830432E09Rik	8.14758	175.492	28.9379	2.11047	928.013	958.7	3.18877	1.22514	51.2402	18.6937	71.5783	9.61343	0	0	74.7805	592.053	15.1973	549.511	196.387	19.7505	1056.8	1097.96	293.8	1009.17	961.405	1429.2	17.8256	34.7422	0	1282.93	3.92498	2.52808	0	1263.44	0.667761	1.20068	0	8.25499	0	0	1.98989	503.276	3000.91	1.04602	22.7961	229.481	1029.99	150.879	35.1758
5830433M19Rik	927.312	1323.88	907.082	3670.81	1245.53	840.419	718.385	926.452	1394.2	915.548	1436.97	1730.42	721.482	183.908	708.018	1207.79	752.264	0	1121.74	906.782	1253.31	885.006	1531.74	1240.74	960.328	974.287	855.629	402.017	34.172	2470.83	979.282	318.538	62.1397	269.534	906.485	691.293	777.328	531.346	1637.76	259.583	1080.51	609.902	95.7227	488.492	725.451	202.797	184.869	964.483	798.49
5930403L14Rik	28.7793	1.5068	0	7.97289	0.257793	0	8183.3	68.6079	147.421	62.3124	103.991	0	974.667	0	33.076	157.249	0	0	39.6491	0.580898	0	0	0	1.16757	3.76916	0	0	165.439	3197.93	0	0	9055.58	0	0	0.667761	0.300171	6.12069	14.859	0	87.6759	0	0	0	0	0	0	0	21.93	50.1255
5930412G12Rik	14.5868	0	81.9457	333.22	0	0	1031.8	31.7312	14.7001	81.4513	0	0	445.453	0	233.449	0	0	0	65.6688	482.643	0	0	0	9.34054	15.3459	0	10.6954	0	0	0	0	0	0	0	19.4764	7.2041	30.6035	40.4495	18.1469	189.756	0	0	0	0	0	0	0	162.721	115.42
5930416I19Rik	3252.85	3632.39	3359.77	2892.28	6266.05	9543.42	2372.45	2776.05	2737.99	4925.8	4581.69	1759.26	2173.01	3710.05	2872.82	4348.98	5574.86	2132.34	3183.08	3192.87	2981.16	2013.35	8226.65	4797.15	2864.56	4590.26	5342.69	1225.9	916.948	1492	2482.55	45.5054	1154.29	1549.82	5587.82	2938.67	2644.14	2240.13	1283.89	1782.95	11326.4	3693.53	2311.7	1537.65	2166.97	949.943	4727.37	5665.84	5833.02
5930434B04Rik	4890.52	1919.46	3137.19	2911.51	1211.37	3691.62	4808.22	4561.08	3176.68	3857.14	6652.73	10815.1	3766.37	1273.4	2072.76	680.15	139.308	1015.4	1242.96	3695.59	1580.83	3651.37	2247.87	851.157	1317.59	7783.86	2449.95	8444.01	1503.57	133.045	1153.94	7589.3	3656.83	14032.6	3589.1	9006.62	4712.93	3492.14	7040.99	1104.72	2722.16	776.239	43.0752	3596.22	190.414	533.676	2493.09	4296.09	2149.68
6030407O03Rik	0	0	38.1331	0	0	0	99.7631	148.365	0.210001	0	927.817	0	17.1328	0	0	0	0	0	24.3676	8.87944	0	2.21215	0	0	0	0	0	0	0	0	0	0	0	0	0.111293	0.300171	0	7.42949	0	0	0	0	0	37.6568	0	0	0	0	0
6030408B16Rik	9432.26	48.8204	1616.74	16.8838	7.51897	0	46.9205	18.0096	16.8001	91.6883	1.35053	0	156.099	0	558.457	0.947284	0	17.9188	164.585	2914.45	0	18.7295	1.78524	3.11351	25.3072	235.744	28.521	0	0	0	0	0	0	0	30.0492	41.7237	91.8104	48.4293	0	0	0	0	0	0	0	0	0	12194.9	2.85803
6030419C18Rik	148.299	1.40635	55.1713	3.04846	0	0	360.331	12.619	0.420002	551.465	169.492	14.4201	40.9284	3.48876	275.633	0.947284	0	0	0	204.642	0	0	0	0	6.19219	15.9619	0	147.241	0	0	0	0	0	0	1.00164	0	0	3.57716	0	1.56564	0	0	0	0	0	0	0	182.458	0
6030422M02Rik	31.1448	23.707	270.718	157.582	35.7903	152.52	12.7551	118.104	1.68001	255.481	96.5632	0	0	146.528	405.061	0	60.789	0	263.914	348.456	0	467.205	435.854	138.551	106.344	14.1201	233.872	3.30878	0	0	0	0	0	0	102.613	49.228	0	57.5098	317.57	149.049	11.9393	0	0	3.13807	194.437	272.175	26.4099	21.4914	148.178
6030429G01Rik	130.821	12.4562	407.294	83.2464	440.955	267.689	922.011	11.1488	153.301	40.058	11.4795	0	62.8204	81.2384	191.266	516.27	0	23.8918	523.078	208.045	200.879	757.439	2.55035	10.1189	364.262	16.5758	55.6159	674.991	76.8869	0	0	0	0	0	82.2458	117.667	153.017	70.4426	54.4406	43.8379	1.98989	0	0	0	0	0	0	89.4745	77.3867
6030446N20Rik	1159.12	1790.38	948.46	593.277	1615.46	410.871	2929.57	961.491	900.274	488.262	1172.26	4965.34	227.486	181.416	1293.8	558.898	12.6644	185.161	1601.04	1449.17	2001.51	863.622	1940.05	2505.21	1156.06	1546.46	2262.43	633.632	672.049	5882.49	912.558	6947.17	3440.28	0	853.175	1188.68	1297.59	1171.11	517.186	329.724	3.97977	1219.8	904.579	4021.96	3084.17	272.175	406.712	2311.86	2274.77
6030458C11Rik	2157.53	2419.12	946.567	1639.37	3435.87	1055.19	3009.29	1808.43	1728.1	1754.54	4179.23	1826.55	1600.02	965.391	1190.26	1612.28	714.271	47.7836	1776.36	1521.7	4611.49	1373.6	1253.49	2542.96	1753.74	1517.6	2618.23	1790.05	1321.32	560.689	1628.87	1883.42	1380.25	774.91	2509.89	3372.42	508.018	2606.38	2817.3	1353.65	831.772	528.866	2129.83	1960.25	2362.74	400.257	348.611	1816.68	2874.96
6230400D17Rik	44.8117	74.6369	77.8889	39.3955	170.874	87.1545	121.629	70.2006	29.4001	132.191	128.301	0	118.026	114.631	69.0282	0	144.374	65.7024	27.6717	17.178	176.133	34.2145	92.3225	4.28108	26.6533	114.803	97.6844	26.4702	5.69533	798.27	17.6624	63.202	1.88302	0	53.3096	90.3514	667.156	3.02683	145.175	285.886	471.603	0	201.018	42.8869	103.253	5.33676	10.564	149.124	123.555
6230409E13Rik	456.199	46.2086	345.091	10.3179	0	0	385.842	265.611	3.78002	1443.42	1243.84	4.80672	234.149	67.2833	154.834	4.73642	2.53288	0	69.1793	203.397	0	0	0	0	0	107.436	0	89.3371	0	0	0	0	0	0	52.4192	1.50085	48.9655	32.1945	1075.2	98.0091	0	0	0	0	0	0	0	156.58	0.439697
6230427J02Rik	1333.57	12232.8	396.206	575.924	25906.5	8232.99	44.6428	398.661	4580.75	106.821	3.37633	0	1027.97	13.9551	452.039	6333.54	420.457	2027.82	15849.5	373.435	1745.32	1251.49	1189.48	231.568	2225.15	2711.06	6424.35	383.819	1742.77	0	6187.73	7.58424	16.9472	6620.43	46.0755	28.8164	12.2414	72.0936	204.152	46.9692	3090.29	17.0602	1086.45	15.6903	3058.7	5.33676	21.1279	206.142	4880.42
6330403K07Rik	6344.46	9.84443	66.8006	11.4903	23.8888	3.11266	11077.3	1520.89	35.2802	35389.9	18091.1	6171.82	221.775	3.98716	736.78	1.89457	0	2.98647	0	443.557	0	0.442429	1.27517	249.081	87.4984	866.852	411.415	137.314	654.963	0	0	0	0	0	17.0279	0.900512	6.12069	3.57716	0	1.87877	0	17.0602	0	0	0	0	0	4264.95	160.929
6330406I15Rik	34779.4	113.814	6683.85	74.57	9.79615	0	34.621	4.90057	40.9502	7339.96	905.533	0	71.3868	23113.6	39375.3	1483.45	91.1835	349.417	552.609	33151.6	11.6452	31.56	17.3424	14.7892	431.03	838.611	119.075	2001.81	17.086	0	190.361	0	9.4151	0	4.34044	21.3121	61.2069	80.0734	9.07344	40735.2	169.14	102.361	0	8.36818	6.70472	0	0	15690.9	266.017
6330407A03Rik	9.13317	501.966	0.270448	34.2365	4117.6	2701.79	21.8659	37.3668	94.7104	0.445089	6.75267	0	19.0365	0	37.3903	2655.24	8806.81	1308.08	91.0689	19.0867	1369.76	3328.69	4442.7	428.108	1910.96	17.8036	489.848	0	0	5987.02	96.162	0	126.162	19086.4	88.8122	117.667	1364.91	44.3018	0	3.44441	6333.81	187.662	86.1504	19.8744	1316.81	1446.26	1167.32	66.2287	811.241
6330408A02Rik	976.461	252.238	341.846	172.121	360.094	532.265	437.773	365.827	888.514	668.969	1164.16	2355.29	1202.15	83.7303	272.757	0	225.426	0	413.424	677.244	1576.46	124.323	190.766	153.73	357.532	463.508	1186.47	842.085	3841.5	0	5.88747	2027.52	214.664	0	515.511	175.3	740.604	270.213	621.531	50.7268	813.863	0	0	101.464	522.969	0	464.814	811.411	289.321
6330409N04Rik	2349.85	2202.94	1748.99	6336.1	1011.02	3753.87	2940.51	6412.76	2328.07	10242.8	4518.21	9075.08	2555.65	2652.96	3523.31	1079.9	493.911	8586.11	2512.97	2891.38	1704.56	1447.33	1017.59	1653.67	2525.07	3171.5	2102.71	6675.47	7438.1	779.263	6788.25	5726.1	3715.2	33.6917	1744.52	2174.44	214.224	10999.8	1773.86	2088.25	1981.93	5109.53	4537.25	6644.33	3469.02	1067.35	5308.39	3764.51	4784.78
6330416G13Rik	367.561	283.279	410.54	104.82	5613.32	2262.9	1077.81	2751.91	323.402	631.136	309.272	543.159	197.979	3.98716	386.845	1222.94	795.323	836.213	404.544	367.211	119.363	2634.22	830.393	1342.7	2121.5	586.905	1.42605	1300.35	11.3907	4200.42	80.4621	5.05616	1144.88	134.767	1416.32	1425.81	24.4828	1378.03	1175.01	8.14133	688.5	4.26505	492.972	633.889	477.376	11079.1	3523.08	1334.66	414.414
6330418K02Rik	108.218	86.0886	119.808	116.076	918.647	364.181	252.369	118.349	35.2802	281.296	224.864	201.882	388.344	12.9583	44.5807	51.1534	108.914	259.823	206.299	111.532	294.041	104.561	82.8862	183.697	156.151	125.853	86.276	196.872	250.594	0	58.8747	15.1685	293.751	185.305	248.073	188.207	220.345	439.991	40.8305	11.2726	3.97977	93.831	330.243	76.3596	10.7276	32.0205	73.9477	249.125	61.5576
6330439K17Rik	562.314	6.32856	367.809	170.948	36.6926	230.337	1112.88	989.057	18.4801	11655.5	1892.77	341.277	395.959	313.49	147.164	0	0	0	15.0749	461.98	0	113.114	0.255035	24.5189	2.15381	1576.54	313.018	172.057	939.729	0	0	0	0	0	18.0295	2.1012	30.6035	38.7985	340.254	276.492	0	0	0	0	0	0	0	182.458	68.3729
6330503K22Rik	654.631	698.252	690.724	275.534	226.128	603.856	1156.16	29249.5	1515.16	2002.01	1553.11	19.2269	640.577	1166.74	267.964	1047.7	58.2561	5.97295	644.917	606.458	1.45565	220.772	250.954	240.519	47.3837	380.015	591.81	110.844	1139.07	0	1367.86	889.884	1205.13	0	242.063	153.087	2876.73	272.415	462.745	588.681	276.594	0	382.891	381.798	453.239	277.511	227.125	486.408	123.775
6330512M04Rik	213.677	742.25	1073.95	1477.8	3200.25	448.223	4214.65	1082.05	1648.09	1271.62	11937.4	6955.32	37.1211	842.786	387.325	630.891	10.1315	382.269	1251.63	84.6452	26585.9	49.4046	0.510069	2357.32	718.294	166.372	7635.78	327.569	0	0	4066.28	0	1.88302	9012.54	11.4632	3.00171	36.7242	7.15433	45.3672	396.107	0	0	17881	25.1045	2840.12	0	0	427.636	15225.4
6330545A04Rik	272.221	236.97	272.882	37.5195	26.4238	0	163.994	256.912	73.0803	432.626	441.625	1951.53	681.506	235.741	68.0695	172.406	245.689	0	116.676	283.644	369.734	105.446	55.5975	79.3946	12.6536	259.073	273.088	153.858	108.211	0	0	0	0	0	124.426	142.881	55.0862	75.9459	294.887	18.4746	49.7471	690.938	0	31.3807	22.7961	0	0	160.089	40.8918
6330549D23Rik	123.199	48.3181	210.138	25.5602	162.367	1469.18	170.827	113.816	142.591	248.805	164.765	48.0672	50.4467	2.49197	198.935	353.337	592.693	0	76.6135	146.303	24.746	111.05	5.8658	2.33514	64.3449	388.61	29.234	4.96317	8.54299	0	818.358	5.05616	1.88302	0	124.203	27.9159	752.845	205.549	117.955	133.706	5.96966	8.5301	19.1445	149.581	69.7291	0	0	219.3	317.022
6330578E17Rik	3454.18	2061.2	2678.78	2622.38	2914.96	5777.1	5670.1	2357.79	2908.09	4822.54	3892.91	3364.7	3813.96	394.729	2962.94	2278.22	1600.78	1735.14	1883.95	3566.71	4266.5	5569.01	3236.9	4227.76	5483.59	1811.67	1324.8	10222.5	3776	6984.86	1772.13	7624.69	5709.32	3925.09	3516.87	3342.1	1713.79	6564.65	2735.64	862.981	4570.77	3838.54	4508.54	10585.7	2746.26	10940.4	4938.65	2332.92	1566.2
6430527G18Rik	5477.34	4940.4	3142.33	7042.64	5288.5	2841.86	3085.37	1487.32	5507.28	4285.76	3209.54	2086.11	2051.18	1677.1	2970.13	6052.2	1063.81	1337.94	4173.48	3738.91	4551.81	973.345	1368.26	2414.92	2127.96	5192.52	2003.6	3024.23	3237.79	4571.04	7740.06	10228.6	1220.2	7277.42	1605.19	1122.04	6243.11	2722.5	6419.46	3161.65	1962.03	3335.27	1249.18	1032.42	3104.29	170.776	2846.99	9951.41	3201.43
6430531B16Rik	433.727	0.30136	373.759	279.52	32.6109	3.11266	292.912	1.47017	11.3401	63.2026	53.3461	0	0	73.7624	143.329	0	0	591.322	68.9728	434.595	195.057	589.316	0	7.3946	544.644	373.876	299.47	18.1983	0	0	0	0	0	0	25.4862	0.900512	0	1.651	4.53672	148.423	5.96966	4.26505	0	0	0	0	0	77.1937	10.7726
6430548M08Rik	405.736	2091.54	1591.04	569.124	755.635	2181.98	2147.87	1550.17	1270.3	12288.5	2077.12	6099.72	173.232	2109.71	1026.79	2713.97	48.1246	7230.25	2176.98	1781.12	78.6049	5236.45	6.88593	49.0379	2829.29	281.174	7.13024	2149.05	672.049	1121.38	7669.41	409.549	88.502	2796.41	1380.48	3790.86	1487.33	2838.07	2776.47	2313.39	5.96966	0	4.78613	1013.6	14668.6	13048.4	10.564	916.675	9126.35
6430550D23Rik	47.3085	2.61179	12.711	57.4517	64.6202	0	305.667	47.9031	20.5801	18.2486	266.73	91.3276	0	0	0	0	0	0	11.3578	34.439	0	10.0284	55.0875	67.7189	34.4609	0	3.56512	28.1246	0	0	0	0	0	0	103.725	115.566	18.3621	147.489	163.322	0	0	0	0	171.548	18.7732	0	52.8198	133.335	13.4108
6430562O15Rik	445.16	5416.75	49.4919	51.5893	26.3809	9.33798	0	0.490057	0.210001	171.804	2.0258	0	1.90365	0	93.4757	3450.96	0	0	392.154	254.599	582.258	26.8407	0.255035	38.1406	0	324.149	274.514	580.691	0	0	0	0	0	0	1.78069	1.20068	0	4.1275	0	348.512	0	0	110.081	8.36818	1422.74	0	0	142.107	769.69
6430571L13Rik	32.2618	29.1315	27.5857	59.5622	29.0017	0	0	44.7177	42.0002	435.297	465.934	1259.36	0	0	0	0	0	0	23.3351	24.4807	0	14.8951	39.0203	1.55676	1.88458	0	0	183.637	0	0	0	0	0	0	29.8266	33.6191	24.4828	23.9395	86.1977	0	0	0	9.57227	605.647	134.094	0	0	0	0
6430573F11Rik	179.969	40.6836	968.203	239.89	21.8265	3.11266	1836.73	386.532	91.1404	1544.01	778.583	1172.84	1005.13	0	0	0	0	0	682.294	147.88	0	0	2.04028	0.389189	0.807677	3121.16	1013.21	51.2861	1514.96	0	98.1245	146.629	207.132	0	399.543	123.971	0	9.08049	739.485	0	0	0	0	1084.73	1780.77	0	5.28198	103.51	235.018
6430598A04Rik	39.358	18.383	41.9194	58.1552	0	0	369.442	31.6087	0	964.508	415.289	105.748	38.0729	0	0	0	0	0	0	37.6754	0	35.3944	1.02014	0	13.7305	66.917	0	206.799	0	0	0	0	0	0	39.7318	11.7067	73.4483	920.707	2105.04	0	0	0	0	0	0	0	0	0	0
6530401N04Rik	4201.13	2533.43	3601.55	1569.02	2063.51	1101.88	3477.59	4821.67	2191.36	2300.22	4228.52	3432	1549.57	854.747	1823.97	2062.24	3211.69	173.215	3270.01	3321.74	569.158	1222.87	1076.76	282.941	1729.51	3084.94	2635.34	751.093	4003.82	4960.68	2553.2	3483.69	5767.69	471.684	3007.71	2370.15	3139.92	1732.17	1379.16	370.431	1687.42	2512.11	1402.34	6573.2	4392.94	731.136	36.9738	3352.22	4258.9
6530402F18Rik	240.091	544.457	333.462	18.0563	150.294	809.292	1047.74	460.898	426.092	548.795	298.468	19.2269	276.981	10.4663	277.551	233.979	0	134.391	622.821	405.799	1342.11	927.627	2.04028	244.8	318.494	114.189	12.1214	62.8668	521.123	1615.55	380.723	0	0	0	5.23079	20.4116	6.12069	2.20133	0	242.987	0	686.673	1593.78	1.04602	1243.06	0	100.358	495.619	155.433
6530418L21Rik	496.017	2420.32	22.4472	47.3684	82.7087	18.676	1295.55	1728.31	118.651	5483.49	8332.12	293.21	5614.81	51.8331	266.046	809.928	0	391.228	1796.18	70.5376	1.45565	249.973	34.9397	12.0649	133.536	4329.35	0	4463.55	6455.66	0	0	0	0	0	75.4569	32.1183	12.2414	130.704	0	114.605	5.96966	0	0	2.09204	195.778	0	1653.26	546.496	525.438
6720401G13Rik	860.489	1144.87	273.693	863.183	860.729	124.506	2793.82	857.477	603.333	1155.45	1328.25	1355.49	414.043	561.193	114.088	2088.76	0	0	797.318	450.445	2.91129	164.436	2.29531	72	192.766	362.211	505.534	2787.65	1062.18	0	164.849	35.3931	88.502	0	1061.07	1102.23	3917.24	2527.95	3543.18	1446.34	0	0	0	889.119	1397.26	0	0	701.761	1504.64
6720456B07Rik	18358.5	19857.8	18322.6	16491	34669.4	35836.1	25254.6	25781.6	22144.4	25881.5	19608.4	25961.1	18025.6	14049.8	15933	12921	42324.3	46505.4	18970.2	17088.4	17549.3	33396.5	18547.9	14566.2	34061.9	17827.6	21584.7	11539.4	14147.2	19519.6	17101.1	45318.4	12781.9	38358	12016.8	12497	6279.83	14512.6	15624.5	11836.6	28304.1	14458.5	16268.1	13844.1	23501.4	42357.8	37491.5	14388.3	25754.4
6720456H20Rik	1646.99	1649.75	2027.28	1382.59	3907.98	6595.73	2709.09	2575.86	1317.13	1169.69	1991.36	2869.61	1460.1	703.235	1894.44	2215.7	2236.53	62.716	1048.43	1527.26	1697.28	1107.25	242.283	1238.79	1594.89	1826.4	3341.95	496.317	1964.89	1064.36	2981.02	3448.3	2242.68	0	1470.07	1804.03	4113.11	910.801	1410.92	1110.98	107.454	754.913	1177.39	2384.93	4450.6	3298.12	739.477	2235.99	1519.15
6720463M24Rik	163.346	329.889	311.556	406.383	291.392	977.376	66.9643	618.574	359.732	1335.71	401.784	0	82.8087	297.043	227.218	587.316	1160.06	298.647	186.268	352.522	336.254	343.915	1048.7	1640.82	71.3448	69.9866	618.192	1124.99	0	959.824	1016.57	0	0	0	2451.46	2036.66	556.983	1124.05	721.338	391.097	1723.24	1616.45	1866.59	243.723	0	0	734.195	178.072	267.995
6720468P15Rik	0	25.5152	71.1278	22.9807	0	0	71.5196	0	8.19004	25.8152	0	0	0	0	0	0	0	0	0	32.9452	0	10.9133	0	0	36.8839	305.117	0	23.1615	0	0	0	0	0	0	81.1329	647.468	12.2414	175.281	136.102	0	0	0	0	0	0	0	0	0	0
6720483E21Rik	33.2474	58.9661	0.811343	33.0641	0	0	454.628	90.538	1.26001	49.85	0.675267	514.319	107.556	0	0	0	0	0	0	19.5846	0	0.147476	0	0	0	1.22784	103.389	0	0	0	0	0	0	0	24.8184	0.900512	116.293	22.2885	0	0	0	0	0	0	0	0	0	28.509	188.63
6720489N17Rik	1120.42	130.991	1633.23	306.487	397.861	3616.91	1307.4	1239.97	348.602	468.679	829.903	374.924	143.725	426.626	877.233	0	83.5849	0	435.314	801.391	0	217.528	211.424	107.027	1309.78	3.68351	233.159	507.898	2.84766	370.625	0	5.05616	278.687	3520.79	431.262	158.79	12.2414	43.4763	9.07344	83.2921	650.693	0	564.764	0	166.277	2273.46	1611	1148.26	285.803
6820431F20Rik	372.16	722.662	221.497	392.782	688.093	105.83	645.499	433.088	467.882	725.05	747.52	149.008	352.175	532.286	348.976	438.593	714.271	262.81	712.651	311.61	75.6936	218.855	623.56	614.53	295.341	1190.39	1169.36	196.872	256.29	760.257	284.561	381.74	69.6718	16.8459	448.513	342.795	2038.19	734.694	1469.9	746.811	690.49	294.288	315.885	310.669	1051.3	26.6838	839.835	692.112	474.653
7420461P10Rik	4.33661	0.200907	23.7994	5.39343	0	0	0	0	0	0	0	0	0	0	59.4409	0	0	0	0.206506	9.1284	0	7.66878	0	0	0	0	0.713024	0	0	0	0	0	0	0	18.586	0	12.2414	23.6643	0	2.81815	0	0	0	0	0	0	0	0	0
7530420F21Rik	309.214	0.200907	646.911	4.92443	0	0	0	0	81.0604	26.7053	0.675267	0	0	34.8876	894.011	8.52556	0	0	0	220.326	0	7.07887	0	0	1.34613	0	317.296	0	0	0	0	0	0	0	0.556467	0.600342	91.8104	9.35566	0	0	0	0	0	0	0	0	0	192.107	25.0627
8030462N17Rik	238.382	532.805	293.436	794.006	508.197	1973.43	500.182	391.555	771.124	487.817	306.571	264.369	1189.78	614.521	575.235	431.962	263.419	0	244.296	318.249	213.98	475.317	542.203	325.751	384.454	497.887	368.634	441.722	706.221	1701.07	176.624	7.58424	1881.14	0	425.809	409.733	1585.26	514.011	1052.52	723.639	1605.84	980.961	880.648	383.89	333.895	0	0	210.967	55.4018
8430403D17Rik	110.846	194.779	202.024	139.76	227.546	0	344.388	289.011	181.861	195.394	202.58	0	267.462	254.181	160.586	748.355	215.294	194.121	174.497	96.4291	0	142.315	69.8795	84.4541	268.956	170.055	42.0684	9.92634	168.012	0	0	0	0	0	62.213	114.665	0	151.066	281.277	89.2415	0	0	0	248.953	331.213	848.544	68.6657	1413.17	322.298
8430406I07Rik	2809.14	2138.75	1415.25	690.828	4727.29	7626.02	2227.59	2936.79	1382.02	1813.74	3086.64	1716	1697.1	883.156	2450.98	700.99	823.184	2490.72	2104.5	2252.39	1761.33	1061.68	1419.01	448.346	3073.21	2374.02	5181.55	5011.15	9246.37	5340.8	912.558	2634.26	653.408	1600.36	2752.4	1554.88	3188.88	579.776	244.983	2425.49	425.835	0	1718.22	1848.32	3562.89	4482.88	2524.79	2293.88	1735.7
8430408G22Rik	319.53	392317	355.639	280536	198.071	43.5773	117.074	60.277	84309.1	52.9656	8.1032	9.61343	3871.07	2339.47	47.4569	160856	2.53288	600.281	359997	50.2892	26.2016	473.399	31.3693	30.746	3463.86	6633.99	8176.96	36682.8	3121.04	28.5096	61351.3	111.236	6588.69	16.8459	9988.47	2032.76	630.431	4707.27	176.932	233.28	99.4943	17.0602	224.948	93722.5	13374.6	2534.96	1193.73	15.351	121025
8430410A17Rik	3349.18	3213.2	3558.28	7820.94	2793.62	1145.46	2074.53	3162.58	3270.56	3565.16	4006.36	1148.81	3736.86	7389.7	3188.24	6733.3	13034.2	13080.8	4822.73	3179.59	2529.91	3022.53	14656.1	3402.68	4062.08	2819.11	3700.6	2284.71	2235.42	1682.07	4851.27	5106.72	1318.11	4363.08	3796.89	2446.69	6445.09	3210.09	11078.7	6049.95	10534.5	10513.3	4111.29	2330.54	3042.6	4178.68	9153.67	4044.34	3763.37
8430410K20Rik	3457.86	3235.1	1409.03	1519.31	1590.16	286.365	5251.45	1863.32	3252.92	6364.77	3756.51	14751.8	2471.89	677.319	544.076	2731.02	509.108	20.9053	2346.73	2176.54	528.4	902.114	264.216	414.876	1829.93	2415.77	5098.12	6157.64	4550.57	171.058	3067.37	6383.4	4142.64	10343.4	1830.78	1486.75	936.466	3052.7	911.881	486.914	758.146	1961.92	177.087	2708.15	5428.15	619.064	153.177	2121.95	1487.49
8430419L09Rik	951.492	777.108	1164.55	264.981	3240.2	2001.44	19320.8	29357.6	907.414	14572.7	20464	28326	1147.9	505.871	1080.96	494.482	0	26.8783	513.992	1092.75	132.464	940.015	821.976	1435.33	1232.25	298.978	623.183	1249.06	501.189	5321.8	1269.73	9996.03	28.2453	0	6.90019	9.60546	1285.35	64.3889	875.587	752.447	658.652	648.287	2196.83	3233.25	286.962	1035.33	5836.59	1021.94	899.84
8430423G03Rik	5.51933	0.100453	40.2967	14.5388	0	0	0	0	0	0	0	0	0	0	0	0	0	0	0.206506	5.31107	0	0	0	0	0	0	0.713024	0	0	0	0	0	0	0	2.22587	0	0	1.37583	36.2938	0	0	0	0	0	0	0	0	15.351	3.07788
8430427H17Rik	362.764	1312.32	110.613	615.32	1058.93	1998.33	1186.68	2285.62	659.193	926.675	2255.39	0	26.6511	273.619	90.1201	377.966	0	14.9324	1634.9	362.231	5.82258	538.732	0.255035	321.47	563.489	624.968	2228.91	170.402	0	845.786	3964.23	17.6966	80.9699	0	1962.99	1974.22	1028.28	5597.16	4536.72	221.068	99.4943	0	1158.24	9.4142	2648.37	0	0	648.252	953.043
8430429K09Rik	356.391	404.626	555.5	514.721	498.443	236.562	1383.93	985.994	473.132	1318.8	754.948	504.705	788.11	315.982	563.251	48.3115	795.323	397.201	696.956	628.615	519.666	104.118	439.935	39.6973	447.453	802.39	1252.07	234.923	56.9533	0	983.207	3637.91	173.238	2762.72	1391.95	656.173	3299.05	3141.85	1764.78	377.946	202.968	76.7709	4.78613	585.772	1414.7	16.0103	0	220.178	545.004
8430431K14Rik	56.9016	0.30136	18.6609	0.234497	40.2587	0	0	0	233.731	19.1388	145.182	634.487	1421.07	0	0	0	0	0	15.4879	114.686	0	0.147476	0	0	44.4222	1320.54	431.38	0	259.137	0	0	0	0	0	1.44681	0.300171	6.12069	2.20133	18.1469	0	0	0	0	0	246.734	0	0	1153.52	316.142
9030025P20Rik	203.755	200.304	404.049	312.819	534.449	756.377	331.177	239.025	238.141	277.29	142.481	312.437	182.75	948.944	580.029	204.613	387.53	591.322	261.023	218.169	334.799	143.937	147.92	151.005	223.996	248.637	243.141	100.918	538.209	0	66.7246	1597.75	384.136	1650.9	219.805	232.632	0	78.1473	172.395	261.462	0	25.5903	0	398.534	340.6	16.0103	427.84	396.495	319.66
9030224M15Rik	420.651	122.151	1328.17	30.7191	0.38669	0	205.448	13.9666	103.53	71.2142	19.5827	605.646	1877	0	597.765	7.57828	0	2.98647	90.6559	1122.21	0	0.147476	0	0	72.6909	0	0	617.088	0	0	6189.69	0	7.53208	0	190.534	177.401	79.569	22.5636	122.491	119.615	0	0	0	0	0	0	0	10699.7	5759.37
9030418K01Rik	6.3078	1619.51	252.869	22.9807	2485.34	1357.12	1820.33	374.036	228.061	1120.73	1029.11	677.747	897.57	0.99679	127.031	2703.55	0	200.094	1050.91	167.299	0	507.909	0.255035	0.778379	478.683	1061.46	409.989	1619.65	2901.77	0	270.824	27.8089	0	0	120.753	80.7459	30.6035	112.268	181.469	27.2421	0	162.072	306.312	2.09204	194.437	474.971	84.5116	263.599	320.979
9030425E11Rik	14092.3	69.5138	30178.2	356.904	450.881	62.2532	133.929	3.67543	772.174	4388.13	2.0258	62.4873	7.61459	2618.57	28533.6	1023.07	43.0589	764.537	343.006	18021.5	5.82258	1197.51	6.12083	286.833	2415.22	523.058	474.161	307.717	153.774	988.334	759.483	0	1131.7	0	508.277	159.091	0	1069.02	1038.91	10645.1	59.6966	29.8553	0	141.213	89.8433	747.146	0	8116.3	144.001
9030612E09Rik	378.994	0.703174	62.7439	0	0.257793	3.11266	1.82216	36.7543	11.9701	158.897	156.662	0	81.8568	0	390.68	0	0	0	56.5825	210.036	0	0	0.255035	0	0	77.9675	119.788	206.799	837.213	0	0	0	0	0	139.117	6.60376	232.586	10.7315	18.1469	50.7268	0	0	0	0	0	0	0	0	0
9030617O03Rik	841.303	839.188	625.816	1595.52	4489.3	6150.62	1977.04	11.7614	500.432	454.881	10.129	206.689	414.995	251.191	245.913	21.7875	167.17	125.432	572.64	725.044	676.875	1749.81	52.7922	797.449	3527.66	577.083	812.135	11812.3	3636.47	1187.9	2492.36	3817.4	12217	21630.1	3390.33	988.763	587.587	964.733	1102.42	974.455	0	379.589	411.607	4496.85	695.95	1536.99	1162.04	815.359	1050.88
9030624G23Rik	176.158	46.7108	280.725	219.02	16.155	12.4506	8.1997	14.8242	26.8801	32.4915	286.988	0	653.903	8.47271	16.7777	14.2093	0	14.9324	54.724	207.298	17.4678	7.5213	5.10069	38.5297	48.4606	163.302	27.808	127.388	11.3907	0	9.81245	0	1.88302	0	239.726	41.7237	342.759	301.032	576.163	10.9595	0	311.348	14.3584	12.5523	12.0685	0	0	132.896	141.363
9030624J02Rik	7255.74	4341.4	3757.6	2913.62	7883.53	2798.28	7663.99	10487.2	3343.64	2802.28	7583.92	5359.49	4486.9	1258.95	3099.56	3147.83	1243.64	2248.81	3164.9	4380.14	4007.39	3252.45	4548.54	3001.04	7032.18	8003.64	3677.78	3642.97	4442.36	11974	4676.61	2500.27	6473.82	673.835	2528.59	1610.42	12247.5	2079.16	2059.67	1820.21	2551.03	1518.36	1416.7	4925.72	2132.1	3645	3734.36	4221.09	2331.05
9030625A04Rik	312.499	69.3128	1116.41	1026.86	5000.68	5711.73	438.684	14.8242	50.4002	6.23124	138.43	187.462	0	3.48876	445.328	0.947284	124.111	2287.64	23.9546	1218.97	0	2420.97	41.5706	83.6757	6607.07	1133.29	3.56512	501.28	0	20584	312.036	5.05616	156.291	0	614.674	204.716	42.8449	227.287	281.277	20.9796	5.96966	0	57.4336	1043.93	418.375	1083.36	961.32	318.424	134.547
9130008F23Rik	1023.64	576.703	676.66	7251.82	0.859311	373.519	22.777	80.0018	68.2503	49.85	0	0	2021.67	588.604	762.666	157.249	0	5.97295	436.759	781.889	1.45565	118.866	0.765104	0.389189	400.339	967.534	129.057	0	777.412	0	0	0	0	0	4147.79	403.43	257.069	4629.95	58.9774	774.992	0	0	0	0	0	0	0	542.11	180.056
9130011E15Rik	602.658	626.628	735.618	509.327	1815.81	597.631	794.916	1150.9	955.714	903.976	1010.2	557.579	847.123	102.171	512.438	382.703	326.741	110.5	933.611	722.139	458.529	611.585	491.197	386.465	1115.4	770.467	423.537	1311.93	2041.78	1748.59	1575.88	1284.26	849.242	623.297	827.355	504.587	275.431	893.741	376.548	294.967	155.211	127.951	890.221	1052.3	170.3	53.3676	0	1286.85	929.739
9130011J15Rik	23958.1	10647.6	21066	13601.8	12240.3	7538.87	11368	16021.4	12888.8	11687.6	13678.2	14348	15095	29983.4	18660.6	17586.3	10600.1	8851.91	9849.69	17624.6	5738.16	9244.86	9999.4	4495.14	9486.44	13975.2	14597	38830.2	16490.8	14615.9	9412.1	11849.1	17755	7176.34	12407	16645.7	11323.3	12104.3	10434.5	25378.4	8216.24	4636.11	4589.9	16255.2	8694.69	7081.88	5128.8	16213.7	10278.4
9130015L21Rik	0	0	90.0591	0	0	0	0	0	0	0	0	0	0	0	0	0	0	0	0	0	0	0	0	0	0	0	0	0	0	0	0	0	0	0	0	0	0	0	0	0	0	0	0	0	0	0	0	0	0
9130017N09Rik	59.9898	0.803627	55.9827	345.883	2.40607	3.11266	3.18877	6.86079	79.8004	8.90178	143.832	0	32.362	10.4663	37.8696	0	0	0	43.1597	66.0564	0	34.8044	0	0.389189	1.0769	0	366.495	3.30878	0	0	74.5746	6272.17	167.589	0	19965.5	23337.4	34067.8	176171	20769.1	0	0	0	81.3643	37.6568	0	149.429	5.28198	8.77201	6.37561
9130019O22Rik	1198.68	1383.04	276.938	308.363	2111.84	6.22532	257.835	637.074	705.603	432.626	821.124	0	696.735	510.855	288.576	2020.56	1443.74	456.93	782.243	561.314	1163.06	326.07	769.439	661.622	541.413	1681.52	646.713	395.399	1680.12	2375.8	804.621	0	1075.2	0	940.318	855.487	36.7242	610.869	1728.49	929.051	646.713	1573.8	4.78613	333.681	999.004	736.472	3544.21	1051.76	2331.05
9130019P16Rik	18.5292	9.74398	45.7057	5.15893	319.535	56.0279	8.65524	713.768	78.9604	440.638	47.2687	0	23.7956	0	0	0	0	0	18.379	0.580898	7.27823	102.496	0.255035	0	31.4994	0	155.439	1.65439	2.84766	0	0	0	0	0	43.5157	36.6208	1530.17	167.301	58.9774	0	0	0	244.093	38.7028	0	0	0	21.0528	42.8705
9130023H24Rik	2113.31	1657.28	1410.93	1414.72	5527.69	1578.12	2051.75	1124.93	1228.09	288.863	1619.29	504.705	779.544	1294.33	556.54	0.947284	932.098	5.97295	1128.55	1580.62	988.384	281.238	283.853	24.9081	687.064	1976.2	2852.81	2479.93	2562.9	940.818	5365.45	80.8986	5142.53	0	1809.3	2400.47	440.69	3022.98	4.53672	399.552	19.8989	12.7951	33.5029	1341	327.191	5.33676	0	1932.04	1893.99
9130024F11Rik	2.03689	2.51134	5.94985	44.7889	1.03117	0	6.83309	0	0	141.093	0	0	3.80729	0	0	0	0	0	2.68457	10.9541	0	1.91719	0	0	0	106.822	0	0	0	0	0	0	0	0	1307.59	1324.65	3819.31	1584.96	1456.29	0	0	0	0	0	0	0	0	0	0
9130206I24Rik	164.594	803.024	171.464	30.0156	47.348	37.3519	19.1326	18.1321	15.5401	0	0	0	257.944	4.48555	443.41	424.383	0	0	775.428	241.073	196.512	146.297	451.411	122.205	403.3	275.035	0.713024	1.65439	0	123.542	418.01	0	0	0	9273.97	3576.53	11666	4074.11	7530.95	53.2318	47.7573	106.626	459.469	6.27613	407.647	0	0	421.495	452.888
9130221H12Rik	202.112	224.212	111.965	65.1901	210.66	6.22532	13.2106	37.3668	49.5602	154.001	16.8817	144.201	190.365	12.9583	67.5901	222.612	0	0	377.286	251.197	181.956	243.336	1.02014	38.5297	13.1921	413.78	464.179	31.4334	583.771	0	92.237	2.52808	33.8944	0	102.279	290.865	159.138	158.496	571.627	0.939384	0	272.963	0	77.4056	252.098	0	26.4099	227.634	388.472
9130230L23Rik	95.8654	0	23.7994	1185.38	96.7155	0	0	0.612571	0.210001	0	0	0	1.90365	0	0	0	0	0	22.0961	14.5225	0	536.814	0	2.33514	129.767	0	221.038	21.5071	0	0	0	0	0	0	2419.85	2576.07	3207.24	3439.31	2758.33	0	0	0	0	0	0	0	0	0	0
9130401M01Rik	5231.47	4446.47	5060.08	3918.44	2817.34	2764.04	3151.42	3370.37	2682.76	5840.46	4770.08	12665.7	2440.48	3101.01	3820.52	4127.32	8629.51	6695.67	3151.69	4333.09	1240.21	4537.11	3994.35	4090.77	3788.01	2973.2	2064.21	2774.41	0	950.321	4046.65	1653.36	2383.9	5407.52	2902.09	2953.68	1775	1351.89	1097.89	2035.96	4123.04	3599.7	7586.02	4557.52	1492.47	7893.06	369.738	3031.61	1869.59
9130409I23Rik	0.0657063	1.5068	9.73612	29.5466	0	0	0	0	0	0	0	0	0	0	0	0	0	0	0	14.2735	0	0	0	0.389189	0	0	0	0	0	0	0	0	0	0	12.2423	6.60376	18.3621	5.77849	0	0	0	0	0	6011.49	0	0	0	0	0
9230102O04Rik	0	0	0	820.739	0	0	0	0	0	0	0	0	0	0	0	0	0	0	0	0	0	0	0	0	0	0	0	0	0	0	0	0	0	0	0	0	0	0	0	0	0	0	0	0	0	0	0	0	0
9230110C19Rik	526.307	66.6006	591.74	764.46	20.1508	0	548.014	32.4663	0.840004	462.892	549.667	1019.02	59.9649	560.196	622.692	11.3674	0	0	2.27156	861.638	5.82258	0	0	0.389189	0	156.549	142.605	3.30878	187.946	0	0	0	0	0	264.878	239.836	30.6035	10.1812	77.1242	432.43	0	0	0	63.8074	4.02283	0	0	288.599	119.598
9230112J17Rik	0.591356	0	28.9379	3.28296	0	0	0	0	18.0601	38.2776	0	0	443.55	0	0	0	0	0	55.963	3.56837	0	0	0	0	2.96148	31.9237	0	1081.97	885.624	0	0	0	0	0	62.5469	49.5282	0	309.562	0	0	0	0	0	0	0	0	0	0	0
9230114K14Rik	467.106	333.706	183.093	419.984	228.491	407.759	1722.85	545.801	277.201	513.187	1006.15	980.57	3260.95	495.903	330.76	819.401	460.983	5.97295	706.042	486.378	61.1371	239.797	60.6982	243.633	229.38	615.145	42.7815	2655.3	3385.87	0	930.22	98.5951	282.453	505.376	198.325	210.42	1462.85	126.577	0	331.916	21.8887	51.1806	162.729	569.036	588.675	0	5.28198	223.248	553.579
9230116N13Rik	19.8433	129.384	190.395	209.171	307.762	6.22532	84.7303	165.639	137.341	26.7053	79.0062	0	0	53.8266	30.1998	1.89457	113.979	301.634	151.988	98.2548	18.9234	228.294	115.531	165.016	130.036	0	0	46.3229	199.337	0	0	0	0	0	142.233	189.108	55.0862	133.456	204.152	22.2321	17.909	0	19.1445	5.23011	2.68189	0	179.587	10.0878	160.05
9330020H09Rik	68.5316	163.639	368.891	280.458	213.754	186.76	124.362	192.715	422.522	436.187	116.146	182.655	203.69	732.142	272.757	1765.74	433.122	23.8918	775.841	284.059	240.182	503.337	548.579	380.238	123.036	139.359	330.13	64.5212	284.766	237.58	722.196	78.3705	131.811	0	451.184	329.888	122.414	788.077	1773.86	489.419	336.291	899.925	938.082	149.581	418.375	160.103	121.485	225.879	313.284
9330133O14Rik	1154.92	1174.4	2915.97	4174.28	6742.58	4289.25	1372.99	1532.41	1127.92	2464.9	1156.73	57.6806	2911.63	324.455	792.865	4463.6	2656.99	830.24	2447.3	1371.33	331.887	2049.48	397.599	1126.7	1445.74	3470.48	1690.58	1354.95	6788.83	1929.15	2421.71	300.842	1220.2	13207.2	3882.36	3322.89	4712.93	3447.01	9481.74	440.258	869.58	0	416.394	630.751	750.929	1131.39	1431.42	1368.43	2049.21
9330151L19Rik	702.794	632.354	316.694	442.261	2595.29	2390.52	2848.03	1150.53	298.411	2694.12	2127.77	19.2269	427.369	458.523	806.767	292.711	212.762	0	183.17	390.032	426.504	333.887	893.896	800.563	286.187	1170.13	2042.1	552.566	34.172	731.747	688.834	133.988	192.068	0	737.096	521.397	7246.9	1112.77	562.553	724.892	636.763	136.482	291.954	370.292	724.11	0	2387.45	451.32	583.038
9330159F19Rik	1333.57	4.21904	2894.06	52.2928	3.65207	0	9963.55	6220.17	20.3701	6810.3	6870.84	6378.51	30.4584	1471.76	1005.7	2.84185	0	212.04	72.0704	2166.42	0	1.32729	1.27517	0	3.49993	0	0.713024	0	11.3907	0	0	0	0	0	1.6694	7.80444	18.3621	20.0871	0	2193.78	0	4.26505	0	0	0	0	0	3525.03	64.6355
9330159M07Rik	152.636	55.9525	118.997	80.1979	353.263	108.943	540.269	67.5053	156.031	151.33	259.302	28.8403	65.6758	0	76.2186	15.1566	0	1296.13	63.1907	138.254	0	213.988	0	0	30.6917	39.2907	27.808	354.04	0	28.5096	5.88747	0	41.4264	0	204.112	110.163	24.4828	141.16	18.1469	0	0	0	0	329.497	13.4094	0	0	114.036	110.144
9330175E14Rik	14.5868	76.445	95.7385	51.3548	57.7457	585.18	0	9.92365	114.241	2.67053	0	0	17.1328	73.264	32.1173	795.719	468.582	241.904	169.128	77.1765	250.371	221.952	257.84	595.849	123.575	6.75309	17.1126	0	0	608.205	206.061	50.5616	0	993.906	12.131	0.300171	18.3621	12.3825	0	45.0905	89.5448	1185.68	818.429	17.7824	84.4795	576.37	987.73	13.158	375.721
9330179D12Rik	426.631	66.902	75.4549	91.9228	0	0	722.485	64.9325	39.6902	239.458	394.356	0	311.246	1.99358	318.776	215.981	5.06575	0	206.712	416.67	16.0121	2.94953	2.55035	10.8973	65.6911	186.631	190.378	21.5071	0	57.0193	127.562	0	0	0	62.6582	15.6089	0	2.4765	0	0	7.95954	68.2408	0	0	0	0	0	239.037	149.497
9430008C03Rik	296.861	301.762	850.288	1211.88	392.404	12.4506	746.173	257.77	428.612	928.01	1515.97	0	790.014	1693.55	994.198	336.286	1053.68	38.8242	193.909	907.363	29.1129	320.024	512.875	612.973	241.765	46.0438	531.916	0	88.2776	0	0	0	0	0	1602.85	878	508.018	110.342	889.197	1543.72	951.165	3113.48	253.665	1813.8	349.987	0	776.451	465.794	475.532
9430015G10Rik	756.673	380.919	461.925	569.124	1133.3	2854.31	1255.01	1457.8	1029.42	1799.05	2298.61	2547.56	856.641	410.179	305.833	674.466	86.1178	26.8783	1082.5	502.228	1.45565	941.49	1392.49	416.433	656.911	1806.76	323	143.932	0	0	25.5124	0	141.227	2526.88	897.693	367.409	391.724	242.697	145.175	169.715	21.8887	1002.29	19.1445	490.584	277.576	133.419	0	1072.38	407.599
9430016H08Rik	1948.32	2256.69	1732.22	3358.46	2234.25	1391.36	2916.36	1253.44	1620.58	1710.03	3209.54	927.696	2738.4	2475.53	633.238	938.759	1722.36	2795.34	2490.25	2096.79	295.496	1399.55	2223.14	1502.27	1047.29	2051.1	2007.16	2747.94	1987.67	883.799	3202.78	1408.14	7356.96	1718.28	2533.93	2338.93	1022.16	1640.82	1038.91	2264.23	1394.91	2192.23	2196.83	4626.56	1736.52	939.269	1700.8	1954.4	1606.43
9430020K01Rik	5789.44	30563.2	3264.57	359.015	3.52318	0	461.006	1843.96	113602	7395.6	806.944	28.8403	10618.5	3519.66	5455.62	20549.4	25.3288	23.8918	14794.3	7489.27	794.783	128.894	9.43628	147.503	326.571	2292.98	26935.2	4341.12	7546.31	9.50321	16167	78.3705	112.981	0	9.23735	14.4082	79.569	13.7583	22.6836	5750.6	29.8483	281.493	3077.48	708.157	6825.41	245.491	184.869	8766.31	13740.5
9430023L20Rik	10390.6	8162.64	7625.27	11305.1	10775.1	9440.7	7227.58	7227.85	11407.9	7859.38	7313.14	7296.6	8459.81	8435.83	5843.91	7406.82	22264	5898.29	7834.41	10204	36040.3	12728.3	40694.8	23518.3	9720.39	4030.37	6429.34	5998.82	5988.64	6813.8	11586.5	1539.6	5323.3	6519.35	16395.6	17884.5	18955.8	12220.1	7222.46	6552.21	12444.7	17823.6	3627.89	14520.9	11773.5	5576.91	4489.68	9362.81	14098.4
9430037G07Rik	13.864	0.100453	22.1767	10.5524	0.859311	0	435.495	6.24822	1.26001	116.613	273.483	67.294	170.376	0	26.8443	0	0	226.972	2.68457	62.986	0	2.21215	2.04028	28.4108	71.3448	4.29742	0	481.428	0	0	0	0	0	0	112.852	84.0478	177.5	50.0803	217.763	0.313128	0	0	0	92.05	5.36378	0	0	65.7901	176.978
9430038I01Rik	971.993	959.43	758.876	1428.79	926.638	865.32	577.168	291.584	1176.64	265.718	1129.72	67.294	402.621	1646.2	893.532	1887.94	6111.83	1173.68	951.577	1226.19	1190.72	1312.25	3380.99	516.843	880.099	1105.05	540.473	727.932	640.725	237.58	147.187	776.121	152.525	0	2390.81	2341.93	1352.67	2435.5	880.124	1253.77	4294.17	8.5301	320.671	2248.95	510.9	3890.5	2461.4	1424.14	789.256
9430060I03Rik	168.405	38.6746	54.0895	107.869	833.704	152.52	565.324	194.798	82.1104	252.81	662.437	57.6806	0.951824	0	13.4221	0	0	0	316.366	168.294	0	292.003	709.761	285.665	21.2688	588.747	516.943	18.1983	227.813	0	0	0	0	0	491.249	523.798	0	770.466	1002.61	130.574	0	0	0	27.1966	1145.17	0	1817	45.1759	99.8112
9430076C15Rik	253.232	173.383	178.496	1.17248	1.97642	0	361.243	142.116	5.88003	4.0058	16.8817	0	0	2281.15	942.906	264.292	0	71.6754	13.2164	809.523	0	42.3257	0.255035	0	150.228	141.815	11.4084	11.5807	0	0	0	0	0	0	6.7889	5.40307	128.535	7.70466	0	2909.59	0	0	0	0	0	0	0	317.985	29.4597
9430083A17Rik	102.173	20.2916	81.6752	219.958	648.823	9.33798	87.4635	195.9	21.4201	1266.28	54.0213	0	992.752	0	0	0	0	0	169.954	121.989	0	130.517	791.372	126.487	138.92	331.516	52.7638	564.147	367.349	0	0	0	0	0	1547.09	1035.59	2754.31	1109.2	1093.35	0	0	0	0	205.02	113.98	832.534	0	435.53	391.99
9430091E24Rik	328.86	175.291	194.181	311.646	437.089	0	432.307	125.332	87.5704	1237.35	503.074	9.61343	1194.54	746.595	161.545	795.719	1261.37	0	276.098	345.717	525.488	343.473	375.156	537.081	268.149	692.499	1929.44	600.544	8.54299	19.0064	996.945	12.6404	0	741.218	498.261	443.953	318.276	602.614	1079.74	410.198	602.935	204.722	497.758	74.2676	493.468	0	1600.44	114.475	438.818
9530008L14Rik	0.52565	2.8127	9.19522	2684.75	1004.19	0	0	0.367543	358.052	2.67053	0.675267	0	0	77.2512	1.43809	0	0	2.98647	295.922	10.9541	0	78.0151	4.33559	2.33514	16.1535	0.613918	0.713024	0	14.2383	0	0	0	19402.6	0	4248.29	838.077	42.8449	11799.1	322.107	78.282	3.97977	0	0	30762.5	13.4094	3105.99	1346.9	5.26321	1.09924
9530026P05Rik	416.381	708.196	526.562	60.7347	0	0	234.603	1.59268	1023.75	7.56651	72.9288	0	1004.17	87.7175	247.351	1188.84	0	0	667.426	157.091	0	0	0	0	6.99987	1302.12	1717.68	413.598	1509.26	0	4745.3	192.134	35.7774	0	4.45174	0.600342	30.6035	60.5366	13.6102	407.693	0	0	0	0	1070.07	69.3778	0	1941.25	765.952
9530027J09Rik	7.22769	28.8301	17.3087	117.483	126.276	220.999	23.2325	24.5028	99.7505	14.6879	97.9137	0	0	274.616	134.701	0	0	14.9324	122.458	28.0491	0	31.56	422.082	21.4054	20.7304	0	0.713024	51.2861	0	0	0	0	0	0	74.1214	49.8283	0	30.2683	0	479.712	0	0	33.5029	41.8409	21.4551	0	0	68.8603	103.109
9530036O11Rik	0	0	0	1319.28	0	0	0	0	0.210001	3.11562	3.37633	0	0	0	0	0	0	0	0	0	0	0	0	0	0	0	0	0	0	0	0	0	0	0	39.843	230.531	177.5	11.0067	0	0	0	0	0	0	0	0	0	0	0
9530048J24Rik	22.7344	17.1775	104.663	54.4033	20.1508	0	43.2762	38.1019	3.78002	61.4223	12.1548	115.361	197.979	0	55.606	0	0	0	24.9872	11.1201	10.1895	11.3557	3.06041	15.5676	20.9996	87.1763	0	8.27195	88.2776	0	0	0	0	0	4.45174	21.012	0	17.8858	0	28.1815	0	0	0	9.4142	142.14	0	0	252.634	69.0324
9530051G07Rik	23.1286	0.502267	1.89313	7.5039	0	0	334.366	0	0.420002	121.509	18.2322	0	151.34	0	0	0	0	0	10.9448	5.47704	0	0.147476	0	0	0	197.681	0.713024	0	0	0	0	0	0	0	2.33716	0.600342	0	6.60399	0	0	0	0	0	0	0	0	0	0	0
9530052E02Rik	12.4842	1.00453	0.270448	13.8353	0	0	0.911078	3.4304	0.210001	7.12142	31.0623	0	0	0	0	0	0	0	8.05371	0.746869	0	6.19401	0	0.778379	0	0	0	41.3598	0	0	0	0	0	0	73.565	112.264	0	1.37583	730.412	0	0	0	0	0	0	0	0	0	0
9530068E07Rik	31869	11304.5	32086.7	14527.1	22749.5	23376.1	9390.48	15292	11963.3	9421.2	15451.5	12843.5	22878	10049.6	24833.4	8939.52	2350.51	7528.9	10145.2	29312.3	9080.32	10955.6	10469.2	7508.63	18970.5	23343	17312.9	18779	20232.7	12202.1	13519.6	17964.5	24388.9	18867.4	11176.4	9142	5508.62	8404.41	5965.79	15043.6	13141.2	9400.17	10711.4	17563.8	10994.4	14985.6	4141.07	28770.9	11292.5
9530077C05Rik	1399.54	48.1172	1012.56	108.103	114.847	0	1890.49	1258.1	239.821	1465.68	1850.23	2888.84	2653.68	887.143	670.628	3.78914	12.6644	0	331.648	980.639	244.549	268.555	167.813	4.28108	32.8455	802.39	462.04	459.921	731.85	0	0	0	0	0	96.8253	41.4236	97.9311	24.4898	186.005	634.711	0	29.8553	660.486	67.9914	0	74.7146	0	1094.75	269.974
9530080O11Rik	0	0	0	44.0854	0	0	2.73323	1.10263	0.630003	604.431	158.012	96.1343	0	0	0	0	0	0	0	0	0	3.09701	19.1276	4.67027	0	0	0	0	0	0	96.162	50.5616	88.502	16.8459	213.016	305.274	697.759	292.227	68.0508	0	0	0	0	133.891	0	0	987.73	0	0
9530082P21Rik	2240.65	7647.62	2235.52	827.07	734.625	189.872	3002.91	3238.66	3707.57	10594	4949.71	3840.57	2662.25	642.431	1213.75	7976.13	45.5918	319.553	5501.31	2417.12	97.5283	547.58	236.672	454.573	434.8	2316.31	2622.5	1040.61	3371.63	883.799	7290.65	1749.43	1939.51	67.3835	954.341	1053.6	1426.12	3532.86	1537.95	828.537	1723.24	2311.66	512.116	1293.93	14749.1	240.154	750.041	1653.96	5536.88
9530091C08Rik	2429.88	363.742	1362.25	937.518	1.97642	0	8581.9	53.0486	146.161	4191.4	5015.88	12372.5	988.945	4941.58	2951.91	937.812	2.53288	322.539	673.621	1542.95	4.36694	3.83439	3.06041	1.16757	1.61535	4449.06	971.852	459.921	279.071	0	3919.09	70.7863	22.5962	0	56.2032	34.2195	36.7242	33.5703	1637.76	8118.16	0	0	0	132.845	3739.9	10.6735	0	2995.2	1382.63
9630013A20Rik	0.197119	39.3777	13.5224	1.40698	0	0	40.543	3171.03	0	162.903	2291.18	0	0.951824	342.397	0.479362	114.621	0	0	215.385	26.7213	0	8.11121	0.255035	0.389189	0.269226	0	1.42605	0	0	0	90.2745	0	120.513	0	114.966	23.1131	1266.98	36.8723	4.53672	82.0396	7.95954	0	0	0	213.21	0	0	0	30.7788
9630028B13Rik	1.0513	0.100453	27.3152	1.87597	1.84752	868.432	0	0	0	0	0	0	0	0	8.62852	1.89457	0	0	42.5401	33.3602	0	23.4488	0	0.389189	2.69226	1.22784	27.808	0	0	0	0	0	0	0	195.876	27.0154	55.0862	4900.99	385.621	120.867	0	0	0	0	0	0	0	0	0
9630033F20Rik	129.244	422.909	103.581	128.739	237.127	56.0279	686.042	107.077	361.622	1714.93	476.063	0	700.542	7.47592	68.5488	575.949	688.942	0	475.376	227.712	221.258	123.143	794.433	379.849	303.956	311.87	248.133	3515.58	578.076	0	237.461	133.988	372.838	0	478.673	104.159	134.655	507.682	335.717	109.282	726.308	1125.97	928.51	755.228	191.755	10.6735	744.759	14.9124	128.392
9830001H06Rik	2621.22	3367.9	3173.43	364.643	22424.7	16002.2	3883.02	7094.67	1590.13	2915.78	7924.93	3773.27	4729.61	2379.84	3141.74	4998.82	2.53288	2239.86	3556.23	3611.61	1.45565	2136.2	3.57048	4.28108	3256.82	7545.05	3818.96	719.66	1133.37	2898.48	2990.83	1787.35	224.079	0	146.796	24.3138	734.483	620.775	1075.2	2397.62	9.94943	0	4.78613	121.339	5873.34	490.982	713.067	7826.83	4214.72
9830147E19Rik	1004.45	551.087	747.788	255.602	944.297	108.943	287.901	85.3924	922.534	566.598	674.592	52.8739	1.90365	258.169	477.445	553.214	0	0	731.029	661.643	1.45565	65.0371	0.255035	2.33514	78.0755	1.22784	805.718	299.445	0	95.0321	0	2.52808	205.249	0	846.943	387.52	948.707	390.186	503.576	23.1715	0	0	0	471.756	878.319	0	0	1295.63	454.207
9930005F22Rik	0	0	7.03164	800.103	0	0	71.0641	11.1488	62.5803	77.0004	0	0	0	0	0	0	0	0	0	9.21139	0	25.9559	0	0	0	0	0	0	0	0	0	0	0	0	28.4911	69.0393	30.6035	5.77849	0	0	0	0	0	0	0	0	0	5.70181	1.97864
9930012K11Rik	324.26	361.431	126.84	28.1396	703.733	504.251	254.191	819.988	936.184	1.33527	27.6859	0	96.1342	0	163.942	141.145	0	0	616.832	69.6248	5.82258	210.301	56.3626	233.514	406.262	126.467	144.744	76.102	0	0	0	0	0	0	216.243	168.696	18.3621	421.555	421.915	112.1	0	0	1584.21	34.5187	1377.15	0	1811.72	29.3862	693.402
9930013L23Rik	9.26458	1.60725	358.884	12.4283	0.343724	18.676	16.3994	1.10263	94.9204	606.211	33.7633	0	4.75912	0	0	0	0	0	1.23903	7.80063	0	0.737382	0	0.389189	0	0	0	11.5807	0	0	0	0	0	0	8.12442	9.00512	61.2069	26.9663	244.983	0	0	0	0	0	0	0	0	61.8427	7.255
9930014A18Rik	513.626	945.568	501.14	81.3704	46.6606	0	137.117	8.57599	151.831	26.2602	226.89	0	474.008	0	0	127.883	0	0	415.283	39.916	0	10.1759	83.1413	28.8	118.998	58.3222	279.506	966.164	85.4299	0	1047.97	0	13.1811	0	439.053	265.651	0	241.046	63.5141	21.919	0	0	0	52.3011	0	0	0	125.001	317.461
9930021J03Rik	2339.73	1769.29	2190.63	2659.66	2687.88	1453.61	5247.36	3419.37	2252.68	4471.36	3921.27	3033.04	3071.53	2541.32	2847.89	2409.89	1223.38	1971.07	1255.55	2404.25	968.005	1430.67	2195.08	2225.77	1113.52	2178.18	3101.66	3039.12	840.061	2147.73	1564.1	834.267	1530.9	15110.7	3874.9	2451.49	2662.5	6184.92	9676.82	1583.8	1416.8	1787.05	4427.17	1621.33	5004.41	1675.74	1389.16	1950.02	1316.01
9930023K05Rik	0.591356	257.462	55.7122	0	0.343724	0	0	0	0	0	0	0	0	0	0	0	0	0	509.243	0.497913	0	0.589906	0	0	0	0	0	6.61756	0	0	0	0	0	0	243.176	63.0359	1689.31	45.1273	108.881	0	0	0	0	0	0	0	0	0	0
9930104L06Rik	535.572	881.679	490.592	158.754	1126.51	1033.4	1636.3	1135.09	683.973	846.114	1243.17	1965.95	1099.36	675.823	330.281	804.244	1519.73	209.053	827.674	642.058	291.129	336.246	859.211	544.865	479.222	1146.18	912.671	430.142	934.034	788.766	604.447	364.044	457.574	0	581.397	315.179	42.8449	168.402	1451.75	650.054	579.057	405.18	196.231	219.665	557.833	48.0308	681.375	620.62	863.345
9930111J21Rik1	122.017	1677.37	247.73	18.5253	3291.12	1976.54	0.911078	318.169	1124.98	3.56071	0.675267	4.80672	101.845	0.498395	14.8602	3090.04	559.765	164.256	1354.47	139.084	125.186	2257.72	2093.58	1324.8	2186.65	894.478	11.4084	173.711	1591.84	1815.11	991.057	17.6966	32.0113	33.6917	24.0394	65.7374	12.2414	48.1541	49.9039	7.8282	200.978	1868.09	1206.11	84.7278	246.734	2839.15	4457.99	134.212	1430.77
9930111J21Rik2	17.8721	315.022	57.6054	0.234497	335.432	202.323	0.455539	0.122514	113.611	6.67633	0	0	106.604	0	8.14916	213.139	0	5.97295	128.033	29.2109	129.553	93.0577	152.001	105.86	281.61	192.156	4.99117	3.30878	0	1349.46	313.998	0	0	84.2294	0.556467	0	6.12069	1.10067	0	0	11.9393	102.361	330.243	0	34.8646	0	5.28198	32.895	53.8629
A030009H04Rik	470.194	771.281	557.122	167.9	839.461	2595.96	816.326	2397.97	214.201	19418.8	2864.48	370.117	84.7123	2.99037	107.377	4.73642	65.8548	2968.56	671.143	238.915	0	486.23	234.632	471.698	681.949	187.245	65.5983	0	0	19.0064	679.021	0	109.215	0	935.755	1269.42	716.121	83.6506	4777.17	82.979	376.088	707.998	0	118.201	69.7291	5.33676	1088.09	280.704	193.687
A130010J15Rik	1351.25	1139.74	452.73	5227.17	3386.33	3732.08	1963.83	737.168	3324.11	1400.69	3290.58	1764.06	843.316	47.8459	511	0	3026.79	1421.56	716.781	959.561	502.198	879.845	2848.99	1805.84	1040.83	1300.28	1328.36	3947.38	0	1140.39	3487.34	2.52808	4451.46	791.756	2655.35	7142.56	1885.17	2111.9	7853.06	14.0908	2338.12	0	483.399	3410.03	842.113	3436.87	2355.76	1787.3	1206.31
A130022J15Rik	867.98	2808.98	452.73	675.585	1006.12	1129.9	4498.9	122.637	13170	402.805	1232.36	0	2049.28	590.598	1147.59	5519.83	286.215	86.6077	1971.51	1322.54	33.4799	339.933	435.344	580.671	878.484	709.689	1066.68	564.147	42.715	1111.88	11223.5	571.346	28.2453	454.839	414.012	138.979	12.2414	279.294	258.593	312.189	37.8078	166.337	2048.46	864.014	1519.29	229.481	137.331	2358.36	2866.82
A130040M12Rik	1054.45	135.813	1210.52	1749.11	45.0709	149.408	8.1997	18.6222	86.1004	4.0058	4.72687	0	19.0365	2961.96	2066.53	1351.77	1299.37	2201.03	116.882	1092.92	209.613	851.972	211.679	1597.23	361.301	429.742	360.79	33.0878	800.194	418.141	294.373	5.05616	105.449	320.072	13.2439	12.9073	12.2414	23.114	789.389	2182.5	372.109	2153.85	837.573	3446.64	1039.23	699.115	808.143	656.585	99.3715
A130049A11Rik	41.1978	65.9979	53.2782	16.8838	714.775	233.45	384.019	39.6946	81.9004	377.88	401.108	466.251	57.1094	17.9422	132.304	0.947284	91.1835	0	6.60818	78.0893	4.36694	34.0671	259.115	147.892	86.9599	0	279.506	102.572	0	0	0	0	0	0	51.5289	34.2195	122.414	52.2816	9.07344	74.5245	0	1872.36	0	57.5312	266.848	0	36.9738	5.26321	8.79394
A130077B15Rik	0.131413	0.100453	1.08179	0.468994	898.453	3215.38	0	0	0	0	0	0	0	0	0	0	0	0	0.413011	0.0829855	0	160.307	0	0	447.184	0	0	3.30878	0	0	0	0	0	0	4.56303	1.20068	24.4828	3.302	0	0	0	0	0	0	0	0	0	0.438601	0.219848
A230020J21Rik	26.7424	36.6655	83.2979	30.9536	85.6733	21.7886	146.684	147.14	26.2501	96.1392	289.014	0	119.93	198.86	89.1614	65.3626	172.236	0	211.875	87.2177	0	95.7122	88.497	312.519	9.15367	1.84175	0	26.4702	222.118	0	0	0	0	0	173.173	63.0359	1615.86	94.6572	0	84.2315	0	486.215	0	0	0	0	0	52.1935	29.2398
A230028O05Rik	39.0295	0	11.0884	1.87597	16.2839	15.5633	216.837	7.22834	0	0	0	514.319	0	0	0	0	0	0	0	2.32359	0	74.7706	0.510069	0	148.882	0	0	0	0	0	0	0	0	0	10.239	1.50085	24.4828	11.2818	4.53672	0	0	0	0	0	0	0	0	0	0
A230046K03Rik	2718.53	3534.15	3011.71	1603.25	11264.4	7037.73	3737.24	6496.19	1706.05	3015.03	3682.23	855.595	1537.2	2116.18	2899.66	2491.36	3092.64	4617.09	2145.59	3157.18	484.73	4240.83	4361.86	4629.41	7002.56	4053.7	3059.59	2595.74	4225.93	7184.43	2733.75	1607.86	5104.87	2122.58	1094.46	1099.23	520.259	1253.66	1170.47	4070.04	4747.87	7493.69	1277.9	1525.1	4500.21	7957.1	2846.99	3936	3153.73
A230050P20Rik	2723.26	1127.39	1640	304.846	1025.76	1522.09	226.403	135.501	1754.77	3480.15	1815.12	1788.1	1122.2	824.843	1207.51	779.615	1428.54	364.35	1520.29	1952.81	187.778	522.214	858.191	499.719	1159.56	3437.32	4278.86	44.6685	0	0	843.871	394.381	212.781	0	289.586	243.739	869.138	37.6978	1882.74	648.175	0	891.395	564.764	3553.34	3628.6	1713.1	1684.95	2198.7	2329.07
A230051G13Rik	559.554	339.934	102.77	1216.34	850.288	989.826	1507.83	1200.03	666.543	533.216	1274.9	1211.29	12.3737	249.696	445.807	1459.77	139.308	474.849	460.094	302.98	541.5	851.529	778.11	995.546	481.645	324.762	212.481	992.634	0	199.567	17.6624	1003.65	3914.8	0	2502.54	1834.04	593.707	2039.53	2885.35	208.856	2119.23	656.817	1574.64	2230.12	435.807	0	0	217.546	908.634
A230056P14Rik	387.535	142.744	168.218	239.656	975.576	0	1714.19	1429.37	265.021	690.778	971.034	812.335	343.608	6.47913	92.0376	15.1566	10.1315	5.97295	32.4214	205.389	0	126.682	114.766	144.778	95.3059	319.237	504.108	289.518	119.602	0	0	0	0	0	278.901	476.371	0	74.2949	322.107	56.0499	9.94943	51.1806	0	154.811	103.253	0	10.564	207.458	59.3591
A230057D06Rik	14.981	1.40635	65.9892	2.34497	8.12049	0	312.955	58.9293	1.26001	1310.79	267.406	14.4201	0.951824	0	0	0	0	0	0	17.095	0	0	0	0	0.269226	0	32.0861	9.92634	0	0	0	0	0	0	0.222587	0.900512	6.12069	0.825499	0	0	0	0	0	0	0	0	0	450.443	0.219848
A230072C01Rik	591.225	428.836	418.653	231.917	226.686	0	1385.75	1062.2	275.311	898.189	1130.4	1124.77	559.672	727.656	358.563	664.046	729.468	98.5536	204.853	316.424	0	367.069	77.2755	187.2	264.38	216.099	183.247	337.496	373.044	0	180.549	0	491.468	0	148.577	142.581	434.569	146.939	426.452	333.168	21.8887	12.7951	0	1009.41	360.714	464.298	36.9738	488.162	363.41
A230072E10Rik	0	0	0	20.6357	25.8223	0	6.37755	5.75817	1.47001	93.0236	51.9955	0	0	0	0	0	0	0	23.3351	0.0829855	0	5.0142	3.57048	73.946	0	0	0	0	0	0	0	0	0	0	51.8627	40.2229	0	9.90599	90.7344	0	0	0	0	0	0	0	0	0	0
A230073K19Rik	38.8981	143.247	42.4603	142.574	295.904	108.943	263.302	195.165	46.6202	4917.34	291.715	1600.64	16.181	57.8138	122.717	0.947284	303.945	104.527	22.3026	24.9786	16.0121	84.9465	49.2217	295.784	55.1913	57.7083	111.945	41.3598	0	9.50321	233.536	5.05616	1.88302	0	73.6763	33.9193	42.8449	151.892	244.983	53.5449	91.5347	4.26505	4.78613	29.2886	81.7976	5.33676	15.8459	63.5971	39.7926
A2ld1	615.47	81.7691	615.809	2005.65	690.585	1724.41	4597.3	190.387	5241.2	527.43	149.234	5806.51	1595.26	395.726	324.528	345.759	714.271	11.9459	453.693	581.894	365.367	110.902	571.788	1487.09	375.031	64.4614	1934.44	904.952	865.69	0	180.549	4861.5	7643.18	33.6917	6117.35	4730.99	16415.7	5739.42	3284.58	400.804	191.029	328.409	71.792	11855.6	659.745	10.6735	2482.53	459.215	312.185
A330009N23Rik	973.504	2511.34	1232.97	60.0312	136.201	214.774	80.1749	178.503	5279.84	1119.4	25.6601	115.361	186.557	412.173	631.32	3280.45	230.492	235.931	1977.08	1036.32	379.924	478.561	1645.74	299.287	81.8446	32.5376	1244.94	152.204	133.84	712.741	5143.69	0	0	0	621.796	132.375	3213.36	292.502	784.852	904.94	101.484	1505.56	641.342	103.556	3141.83	0	58.1018	614.041	2540.35
A330021E22Rik	11.2358	103.367	607.155	37.754	1.07414	0	151.239	12.1289	0	472.684	86.4342	0	51.3985	4.98395	2.87617	50.2061	0	0	5.98866	81.2428	0	0.147476	0	0	0	195.84	0	0	0	0	25.5124	22.7527	48.9585	0	19.4764	1.20068	116.293	18.4361	934.564	0	0	0	0	0	0	0	0	0	221.387
A330023F24Rik	354.157	614.172	133.331	272.251	340.889	308.153	3890.76	563.443	303.871	4417.95	297.793	398.957	1885.56	737.624	237.764	1388.72	32.9274	546.525	474.55	206.385	1480.39	648.454	719.708	175.524	455.53	746.524	595.375	906.606	2856.21	123.542	272.786	42.9774	344.593	0	267.216	387.821	244.828	787.801	1814.69	156.251	1323.27	106.626	62.2197	134.937	415.693	736.472	0	1050.01	1429.45
A330032B11Rik	4.40232	15.068	24.3403	2.81396	51.6876	0	41.9096	109.895	3.36002	210.972	122.899	115.361	11.4219	0	0	19.893	0	0	18.1725	10.6221	0	6.63644	5.10069	0	12.1152	0	0	4.96317	0	0	0	0	0	0	24.3733	13.2075	0	25.8656	22.6836	21.2927	0	0	0	0	0	0	0	4.38601	12.3115
A330035P11Rik	107.955	36.7659	192.018	98.7232	212.937	3.11266	85.1858	32.3437	149.311	57.8616	0	201.882	154.195	0.498395	102.104	391.228	10.1315	0	39.8556	97.5909	110.629	125.797	53.5573	3.89189	86.1522	0	457.762	0	5.69533	0	0	0	0	0	679.558	1495.15	869.138	1511.76	1456.29	171.594	0	0	0	93.096	245.393	96.0616	512.352	64.4743	89.2585
A330040F15Rik	53.9448	73.4314	467.334	69.8801	731.36	775.053	30.9767	3.06285	0	170.024	430.82	0	0	259.664	829.297	333.444	131.71	761.551	16.7269	126.636	1.45565	168.418	339.196	114.811	252.264	0	0	0	0	0	145.224	93.539	1662.71	0	177.179	310.677	5575.95	45.6776	27.2203	10.6464	0	166.337	0	381.798	277.576	0	586.3	27.6318	0
A330041J22Rik	11.0387	6.52947	8.38388	130.615	0	0	540.269	74.7337	0	17.8036	295.092	1850.59	0	0	0	0	0	0	0	3.15345	0	0	0	0	0	27.0124	0	132.351	0	0	0	0	0	0	7.67925	0	6.12069	16.51	313.034	0	0	0	0	254.183	0	0	0	32.0178	60.4583
A330049M08Rik	75.0365	4.5204	1.08179	1980.79	14.0927	3.11266	36.4431	243.313	1.68001	851.9	827.877	0	0	3.48876	8.14916	0	0	337.472	291.586	40.4969	0	15.1901	3.31545	695.092	1.61535	4.29742	0.713024	6.61756	0	0	0	0	0	0	224.59	752.528	0	206.65	3624.84	0	0	0	57.4336	533.471	0	624.401	0	206.581	14.0703
A330050B17Rik	241.405	145.055	21.3654	23.4497	294.185	1273.08	364.887	305.428	113.401	573.274	582.08	0	2.85547	0	0	0	0	0	244.916	20.1655	0	6.48896	130.323	127.265	38.4993	101.91	172.552	178.674	0	0	0	0	0	0	254.862	108.662	0	173.08	1002.61	0	0	0	483.399	266.736	5.36378	0	0	165.352	57.3805
A330069E16Rik	228.592	167.757	73.0209	213.392	160.09	0	157.617	225.794	142.381	259.042	243.771	1422.79	276.029	770.518	317.338	601.526	1524.79	80.6348	173.052	315.594	679.787	102.496	808.715	337.427	125.459	123.397	142.605	292.827	0	0	0	0	0	0	320.525	152.187	73.4483	160.697	131.565	25.6765	2371.94	127.951	4.78613	266.736	0	0	0	193.423	273.272
A330076H08Rik	29.5678	0.502267	109.261	4.22094	1.07414	0	496.082	121.534	0	3388.46	629.349	0	0.951824	0	20.1332	0	0	0	0	17.012	0	0.442429	0.255035	0	0	0	0	9.92634	0	0	0	0	0	0	0.556467	0	0	1.651	0	0.313128	0	0	0	0	0	0	0	835.973	1.53894
A3galt2	0.197119	13.5612	216.088	166.493	55.8982	0	0	18.9897	18.9001	273.73	14.1806	0	0	0	75.7393	254.82	0	2.98647	314.508	74.9359	0	190.687	0.255035	0	41.4608	0	52.0508	0	0	0	0	0	0	0	29.9379	1.80102	0	7.42949	313.034	82.0396	0	0	0	0	474.695	0	448.968	79.8253	105.747
A430005L14Rik	5816.05	5078.92	4117.57	2946.45	4577.46	7377.01	2610.24	4628.83	4809.44	2129.75	3645.09	1985.17	3439.89	3862.06	3623.02	1735.43	10412.7	4927.68	4856.39	4290.6	4746.86	3774.37	4033.12	3260.24	3656.62	3658.34	4713.8	6576.2	5421.95	6281.62	7502.6	1746.9	10814.2	4733.69	6199.71	5599.09	1983.1	2990.78	4323.49	2970.02	2650.53	2286.07	4637.76	12983.2	3361.75	3970.55	5873.56	5607.51	6113.99
A430033K04Rik	836.966	1327.99	479.504	287.962	799.804	1833.36	1344.3	921.429	549.783	2013.58	2410.03	932.503	716.723	10.9647	191.266	276.607	0	0	339.289	515.174	404.67	51.0269	451.156	38.9189	362.647	995.16	946.896	411.943	2115.81	0	2319.66	85.9547	909.499	0	711.388	244.339	91.8104	407.521	535.333	267.411	545.229	0	172.301	731.17	75.0929	1238.13	2218.43	1511.86	317.241
A430035B10Rik	341.935	312.209	113.858	165.789	590.347	21.7886	230.047	1562.18	438.482	530.546	817.748	43.2604	498.756	817.866	324.049	8.52556	987.821	274.756	627.983	134.519	229.992	430.336	916.084	205.103	379.608	263.985	0	183.637	0	408.638	871.345	0	114.864	9517.92	553.796	611.148	195.862	1372.81	4.53672	329.098	423.846	2652.86	1387.98	286.61	140.799	117.409	1906.79	74.1235	243.372
A430071A18Rik	42.3805	0.200907	50.8442	77.6185	611.83	3.11266	197.248	47.9031	4.41002	154.891	2.70107	24.0336	126.593	87.2191	68.5488	136.409	25.3288	2.98647	10.7383	24.3977	0	58.6956	42.0807	80.173	18.5766	102.524	0	0	125.297	0	0	0	0	0	311.288	503.086	0	126.301	1896.35	58.555	0	759.178	0	73.2216	0	0	0	544.742	56.0614
A430084P05Rik	1.31413	1.5068	0.540895	0.703491	560.658	4949.13	4.09985	0.245028	0.840004	0.890178	0.675267	0	5.71094	4.98395	16.7777	0	2765.9	1391.7	2.47807	1.90867	16694.8	3624.82	3652.35	78.6163	9457.09	0	0.713024	0	2.84766	66123.3	1.96249	0	22.5962	0	3.3388	0.600342	18.3621	11.557	0	0.626256	2107.29	0	19.1445	8.36818	240.029	20984.1	5313.67	0.438601	1.53894
A430088P11Rik	21.3545	8.73945	17.0382	288.666	0	0	0	0	0	0	0	0	0	0	102.104	0	0	0	0	58.8367	0	19.7618	32.1344	649.946	53.3067	0	0	0	0	0	0	0	0	0	122.534	132.375	0	268.287	907.344	0	0	0	253.665	10.4602	0	0	0	0	0
A430090L17Rik	164.397	540.037	197.968	131.553	348.923	37.3519	255.557	24.9929	560.493	416.603	36.4644	586.419	73.2904	50.3379	308.23	3446.22	0	8.95942	392.154	301.735	23.2903	219.592	69.1144	183.697	256.303	62.6196	114.797	6.61756	0	0	1175.53	439.886	0	0	139.896	108.061	67.3276	24.2146	1061.59	378.572	224.857	34.1204	674.845	87.8659	1157.24	0	0	494.303	1793.08
A430105I19Rik	104.67	1173.6	325.619	229.103	55.9841	0	773.505	446.319	1451.32	233.227	644.88	639.293	5112.24	0	139.974	560.792	0	0	599.072	614.092	0	35.9843	0.765104	0	135.421	133.834	116.936	2412.1	415.759	0	7.84996	470.223	1250.33	0	283.13	244.639	67.3276	1770.97	3497.81	26.6159	0	0	186.659	23.0125	2641.66	0	0	1775.02	2621.69
A430107O13Rik	9122.79	6430.52	16878.6	184.784	16.0262	9.33798	297.012	54.6413	160.441	0.445089	20.258	466.251	2976.35	1149.8	7290.62	6595.94	0	1872.52	4242.04	8037.47	1.45565	145.412	12.2417	1.55676	484.606	11344.6	9815.49	2297.95	6498.37	9.50321	4545.13	230.055	3.76604	0	180.295	28.5162	863.018	95.7579	9.07344	1201.79	0	0	67.0059	3296.02	54.9787	5.33676	0	10978.6	987.779
A430110N23Rik	2367.59	8.13673	673.685	37.5195	2.01938	0	118.896	2.94034	1.05	62.3124	90.4858	298.016	1.90365	1114.91	10641.8	67.2572	0	0	122.664	6620.75	8.73388	20.4992	2.04028	1.55676	14.269	9.82268	1.42605	1.65439	0	0	0	0	0	0	22.1474	446.354	0	30.2683	72.5875	2970.96	9.94943	8.5301	0	0	0	0	0	2714.5	2.19848
A4galt	5648.37	478.259	27521.8	2324.57	2.06235	9.33798	51.0204	10.7812	8132.29	17.8036	4.72687	0	13964.2	2446.12	9352.36	367.546	0	2353.34	6249.68	8095.89	0	900.344	3.57048	13.6216	894.637	4054.31	289.488	9.92634	6506.91	6604.73	837.983	1799.99	2835.83	0	359.255	1546.18	11127.4	361.294	1356.48	3161.03	0	8.5301	0	2.09204	569.902	0	0	10777.7	5732.99
A530013C23Rik	159.798	1.00453	178.766	145.154	70.2057	3.11266	0	0	0	0.445089	0	0	1064.14	202.348	100.666	11.3674	0	543.538	17.966	404.803	0	686.798	0	0	50.6144	0	0.713024	397.054	0	0	0	0	0	0	64.7728	100.557	0	22.2885	86.1977	242.361	0	0	0	130.753	0	5.33676	0	478.952	70.3515
A530032D15Rik	10.4473	0.100453	0.540895	10.3179	12.6319	56.0279	0	0	0	0	0	0	0	0.498395	0.479362	0	3307.94	38.8242	1.65204	89.7903	4.36694	741.069	1459.31	32.6919	139.997	0.613918	0	0	0	0	0	0	0	0	3.89527	0	6.12069	1.10067	0	0.313128	2692.31	0	0	1.04602	0	37.3573	316.919	0	0.219848
A530046M15	0	0	0	324.075	0	0	58.309	1.10263	0	131.301	0	0	0.951824	0	0	0	0	0	0.206506	44.3142	0	8.11121	0.510069	0	0	0	0	0	0	0	0	0	0	0	0	0	0	0	0	0	0	0	0	0	0	0	0	0	0
A530054K11Rik	917.128	973.494	598.23	425.143	1910.08	224.112	918.822	1494.43	591.993	922.224	1243.17	2076.5	220.823	449.054	387.325	224.506	1438.67	89.5942	1002.79	564.633	109.173	670.87	631.721	1102.18	2396.65	663.031	2405.74	499.626	276.223	9.50321	1.96249	1332.3	312.581	0	764.363	508.789	1377.16	1294.11	989.005	221.068	780.035	200.457	995.516	560.668	2051.65	891.238	232.407	660.094	444.314
A530072M11Rik	51.9079	83.2759	52.1964	161.099	469.485	84.0419	286.534	99.9716	219.031	85.9022	788.712	139.395	679.602	0	36.4315	5.68371	0	77.6483	57.4085	94.3545	104.807	119.456	163.477	363.503	212.15	268.896	507.673	4.96317	370.196	0	0	0	0	0	237.945	305.274	0	110.892	145.175	34.131	0	0	263.237	101.464	160.913	10.6735	153.177	44.2987	53.4232
A530098C11Rik	0.197119	5.32403	29.7493	79.4944	36.3489	0	0	1.10263	2.10001	103.261	58.7482	0	0	0	23.9681	10.4201	0	59.7295	18.5855	19.3356	0	44.0955	14.2819	149.06	0	7.36701	0	1.65439	0	0	0	0	0	0	47.5223	37.2212	12.2414	9.90599	22.6836	105.211	0	0	124.439	3.13807	151.527	0	0	44.7373	2.63818
A630001G21Rik	214.005	661.787	196.075	106.227	5013.87	1562.56	1.82216	8.57599	31.7101	0.445089	1.35053	0	16.181	0	122.237	564.582	7251.62	143.351	365.515	32.4473	3615.82	2425.69	12358.2	1396.8	2669.1	736.087	41.3554	3.30878	0	4409.49	732.009	0	2306.7	3352.33	174.508	271.054	30.6035	113.644	86.1977	0.626256	14462.5	2008.84	47.8613	16.7364	746.906	976.626	5218.59	1.7544	198.743
A630007B06Rik	5073.05	4166.2	7322.91	3187.75	3287.81	2602.18	2353.32	3083.07	4745.39	5733.63	2463.37	10464.2	4574.46	3242.56	4566.41	4735.47	4483.19	2472.8	4465.06	3881.23	1545.9	1821.63	2285.87	1306.9	2923.25	4299.27	3580.81	5327.14	2856.21	2898.48	6278	1539.6	2783.1	0	2363.65	4847.16	3464.31	12613.6	5784.32	4108.24	2115.25	3194.52	2814.25	1585.77	5304.78	1670.4	2091.66	6175.06	4310.57
A630055G03Rik	157.564	35.1587	25.963	88.6398	14.6513	12.4506	0.911078	18.0096	0.210001	316.013	114.795	0	0.951824	0.99679	19.1745	0.947284	50.6575	0	3.30409	27.3022	1.45565	42.9157	92.5775	447.179	18.0381	0	0	1.65439	0	0	184.474	0	9.4151	421.147	758.131	115.566	36.7242	68.7916	0	86.1102	115.413	42.6505	1971.89	7.32216	0	0	126.767	1.3158	0.219848
A630066F11Rik	423.543	222.605	184.716	162.037	1055.23	286.365	768.494	644.057	529.412	567.933	700.927	249.949	785.255	427.124	330.281	237.768	0	958.658	580.487	330.033	37.8468	200.273	330.27	156.843	586.104	1650.82	245.993	282.901	897.014	2774.94	11.7749	0	1007.42	0	724.52	594.038	0	906.949	907.344	1.87877	9.94943	0	4.78613	521.965	198.46	3084.65	36.9738	572.812	514.885
A630072M18Rik	959.64	2974.93	617.162	754.611	1126.26	1721.3	1511.48	424.389	2832.7	1016.58	1366.06	797.915	954.679	1412.95	578.59	1726.9	2560.74	474.849	2223.44	805.042	6385.92	799.028	2532.49	1454.79	507.221	1095.84	2014.29	924.804	541.056	38.0128	1324.68	2.52808	387.902	3487.1	940.207	932.03	6438.97	768.265	521.723	2409.21	1472.52	3821.48	1340.12	531.379	2003.37	10.6735	2165.61	858.78	1975.56
A630075F10Rik	34.8243	3.21451	9.46567	16.8838	0	0	0	0	0	0	0	0	0	0	169.215	180.931	0	0	62.3647	162.071	0	0	0.510069	0	0	120.328	110.519	0	0	0	0	0	0	0	11.4632	0.600342	0	55.5836	0	0	0	0	0	0	0	0	0	38.5969	34.9559
A630089N07Rik	429.653	223.408	382.954	56.5137	392.233	451.336	1475.95	116.021	413.702	726.385	814.372	124.975	498.756	420.645	178.323	327.76	131.71	8.95942	317.812	418.745	1180.53	65.7745	185.665	228.454	424.3	127.081	143.318	243.195	0	589.199	25.5124	0	320.113	0	541.443	241.637	336.638	92.7311	58.9774	329.724	101.484	17.0602	38.2891	169.456	573.924	240.154	137.331	298.248	50.785
A630095E13Rik	0	0	0	125.456	0	0	0	0	0	0	0	0	0	0	0	0	0	0	0	0	0	0	0	0	0	0	0	0	0	0	0	0	0	0	1954.98	0.600342	6.12069	5.50333	0	0	0	0	0	0	0	0	0	0	0
A630095N17Rik	0	0	3.24537	2.11047	0	0	0	0	0	0	0	0	0	0	0	0	0	0	0	14.2735	2.91129	23.4488	0	0	0	0	0	0	0	0	0	0	0	0	72.452	78.3446	0	17.8858	63.5141	0	0	0	0	0	0	0	0	0	0
A730008H23Rik	46.0601	60.7743	48.4101	51.8238	51.8165	65.3659	84.2747	40.7972	55.6503	138.423	89.8105	149.008	20.9401	45.8523	52.2505	50.2061	0	0	39.4426	25.4765	4.36694	20.7942	15.047	24.5189	3.23071	36.8351	29.234	3.30878	37.0196	0	0	0	0	0	82.3571	18.0102	667.156	58.8856	127.028	73.8982	0	149.277	38.2891	127.615	28.1598	53.3676	63.3837	46.4917	99.1517
A730011L01Rik	1062.73	835.27	556.852	968.941	1250.9	370.407	1109.24	1171.36	824.674	848.784	883.249	1350.69	2442.38	470.485	604.955	441.435	438.187	0	1005.06	575.919	599.726	585.482	1155.31	978.422	817.638	611.462	1184.33	360.657	458.474	4285.95	1471.87	0	2323.65	673.835	1839.57	1753.6	636.552	1919.01	1882.74	727.084	0	626.962	4.78613	701.881	1130.42	357.563	84.5116	1222.82	1059.01
A730017L22Rik	313.353	673.239	135.224	2176.13	324.046	743.926	905.612	351.861	217.561	518.974	500.373	461.445	742.422	110.145	254.541	221.665	0	232.945	198.452	207.298	0	171.22	254.78	321.081	238.265	109.277	226.742	413.598	31.3243	19.0064	451.373	0	105.449	0	818.674	171.398	3537.76	545.655	526.259	104.272	115.413	29.8553	373.318	1224.89	1055.32	16.0103	10.564	350.88	428.265
A730020E08Rik	0	0	0	202.136	0	0	51.9315	204.476	31.9201	376.99	1093.26	0	0	0	0	0	0	0	34.0734	43.0694	0	25.9559	0	0	0	0	0	0	0	0	0	0	0	0	228.819	184.605	287.673	96.8586	426.452	0	0	0	0	0	0	0	0	12.2808	63.7561
A730020M07Rik	45.0088	1.5068	83.2979	1.87597	17.8737	619.42	329.355	0.735085	81.9004	1008.57	124.924	4595.22	0	0	444.848	0	0	0	0	880.393	0	0.147476	0.765104	0	0.269226	0	0	421.87	0	0	0	0	0	0	58.8742	32.7186	599.828	7.70466	0	0	0	0	0	0	0	0	0	74.1235	0.219848
A730043L09	0	0	64.0961	0	0	0	0	0	38.6402	69.4339	0	0	4.75912	0	0	0	0	0	0	0	0	0	0	0	0	0	0	0	0	0	0	0	0	0	26.933	0	6.12069	5.50333	322.107	0	0	0	0	0	0	0	0	0	0
A730085K08Rik	0	0	133.872	3.51745	0	0	0	7.71839	13.4401	0	16.2064	0	0.951824	0	66.6314	133.567	0	0	12.8033	113.109	0	1.32729	7.65104	0	0	0	0	0	0	0	0	0	0	0	8.4583	3.30188	0	14.0335	0	5.32318	0	0	0	0	0	0	0	0	0
A730090N16Rik	72.1455	38.0718	124.406	19.2287	64.7061	0	57.3979	50.1083	24.7801	750.42	51.9955	4.80672	273.173	0	310.147	0	0	0	85.2868	72.2803	0	19.6144	35.9599	0	0.807677	3.68351	0	67.83	1876.61	0	0	0	0	0	35.0574	28.5162	0	16.2348	0	8.76759	0	0	0	0	0	0	0	83.7727	16.2688
A730098P11Rik	246.793	165.748	387.822	306.487	195.021	130.732	242.347	212.685	161.491	266.163	203.931	158.622	322.668	425.629	235.367	138.304	108.914	343.444	172.845	302.15	183.411	271.357	158.887	206.27	207.304	262.757	221.751	158.821	546.752	142.548	105.974	161.797	135.577	471.684	93.8204	158.19	293.793	233.341	313.034	609.034	589.006	68.2408	205.804	259.414	380.828	138.756	227.125	301.319	408.698
A830007P12Rik	976.658	5419.06	1991.85	1334.99	12513.8	7744.3	446.884	71.3033	2928.04	39.6129	4.0516	4.80672	1253.55	8.97111	556.06	980.439	1220.85	3398.61	4085.09	1186.77	7361.2	2630.1	3691.63	2370.16	6765.37	10172	10455.8	789.144	4228.78	8952.02	14422.3	93.539	5.64906	15043.4	2766.09	3443.26	11745.6	2940.15	2204.85	4.38379	2332.15	5962.54	3895.91	183.054	3478.41	2038.64	3956.2	1149.13	3606.83
A830010M20Rik	168.602	83.6777	96.2794	60.5002	278.932	59.1406	794.005	1855.85	182.281	6008.25	2692.96	389.344	356.934	51.3347	161.066	0	0	0	377.905	178.17	0	109.428	172.403	40.0865	58.422	85.9485	32.0861	320.952	2.84766	0	0	0	0	0	364.041	247.041	446.811	466.682	6619.07	2.1919	290.523	571.516	0	164.225	812.613	0	79.2297	106.58	266.017
A830019L24Rik	0	0	80.8639	0	0	0	0	0	0	0	0	0	0	0	0	0	0	0	0	0	0	0	0	0	0	0	0	0	0	0	0	0	0	0	0	0	0	0	0	0	0	0	0	0	0	0	0	0	0
A830052D11Rik	50.5938	2.00907	67.8824	162.272	464.544	9.33798	12.7551	1475.07	17.4301	62.7575	130.326	0	0	0	0	0	0	0	0.619517	123.067	0	135.531	1.27517	0	251.726	0.613918	2.13907	0	0	0	0	0	0	0	43.4044	93.9535	6.12069	37.973	0	0	0	0	0	730.124	0	501.655	0	1.3158	0.879394
A830080D01Rik	1428.98	1324.78	813.236	1533.84	1095.66	1136.12	1329.72	1265.82	1818.19	1329.04	1362.69	1091.12	2928.76	2262.71	1501.84	4581.07	1957.91	406.16	1240.27	1383.12	477.452	712.311	393.008	780.714	755.986	509.552	2.8521	172.057	133.84	0	2476.66	7.58424	0	7765.95	768.147	915.521	134.655	669.48	1669.51	2353.47	1488.43	1633.51	1086.45	228.033	311.099	5.33676	702.503	1285.54	917.208
A830082K12Rik	693.727	4.62086	879.226	3.28296	0.687449	0	2920.46	84.7798	112.981	566.153	1122.29	1144	1151.71	36.3828	469.296	0.947284	0	8.95942	51.6264	606.707	0	3.09701	0	1.16757	0	3917.41	307.314	443.377	2651.18	0	0	0	0	0	0.890347	2.1012	0	1.10067	0	0	0	0	0	1.04602	1563.54	0	0	517.11	22.4245
A830082N09Rik	151.322	140.534	32.4537	50.8858	243.658	3.11266	531.159	219.423	24.5701	1402.03	502.399	0	160.858	7.47592	12.9428	70.099	0	8.95942	11.5643	21.9911	0	3.98186	0.255035	110.53	1.34613	14.734	15.6865	39.7054	0	0	0	0	0	0	37.0607	5.40307	0	28.067	0	34.131	1.98989	0	0	0	0	0	0	3.5088	10.5527
A830093I24Rik	135.881	3.21451	134.953	79.4944	58.3472	0	1754.74	963.452	20.7901	267.053	1143.9	1432.4	13.3255	85.2255	139.015	0	15.1973	0	1.65204	59.1686	0	4.86672	0	0.389189	0	1.84175	25.6689	243.195	0	0	0	0	0	0	38.3962	6.90393	104.052	18.4361	0	177.544	0	0	0	120.293	0	10.6735	0	0	0
A930001C03Rik	6.76774	20.8943	10.8179	89.1088	0	0	0	0	0	0	0	0	0	0	0	0	0	0	0.413011	3.15345	0	0	0	0	15.8843	2.45567	8.55629	0	0	0	0	0	0	0	86.3637	55.8318	0	322.22	453.672	0	0	0	0	793.931	57.6606	0	0	0	0
A930001N09Rik	6502.82	6492.91	5394.08	2787.46	4617.98	2446.55	5160.35	8046.73	3567.92	6730.19	6124.67	10651.7	6326.77	10242.5	4054.93	3989.96	19394.2	3607.66	5413.13	3975.5	4320.36	5930.91	8822.41	6567.57	5076.25	9049.76	6026.48	5006.19	5840.56	769.76	7325.97	2146.34	7729.8	11943.7	1209.43	2258.48	1450.6	6653.8	7562.71	6205.57	8944.53	4124.3	2488.79	2229.07	7265.24	13405.9	7674.71	5761.9	3578.47
A930004D18Rik	190.745	387.65	48.1397	13.1318	0.300759	0	270.59	26.7081	448.562	58.7517	22.2838	273.983	263.655	0	0	0	0	0	338.463	159.249	0	2.94953	0.255035	22.1838	0	0	221.038	145.586	1554.82	0	0	0	0	0	9.23735	11.4065	318.276	75.1204	0	0	0	0	0	9.4142	16.0913	0	0	80.7025	174.999
A930005H10Rik	637.876	2143.17	454.352	1127.93	966.338	217.886	5146.23	1057.05	1092.85	1045.96	1461.95	2134.18	657.71	286.079	391.639	569.318	2755.77	1221.47	1755.09	502.975	1618.68	550.53	3509.28	4732.15	990.481	527.355	1842.46	2441.88	65.4963	0	1118.62	677.526	832.295	4144.08	1000.08	596.74	355	1362.9	1093.35	383.895	1448.64	7169.55	851.932	2612.96	1355.7	0	802.861	478.513	2280.05
A930005I04Rik	14.324	103.969	29.2084	17.3528	44.7701	0	411.807	62.1147	103.32	258.152	211.359	0	118.978	22.4278	13.9015	159.144	68.3876	0	0.619517	48.7954	90.2501	92.7627	0	125.708	3.49993	0	126.205	52.9405	0	0	0	0	0	0	526.084	954.843	856.897	48.7045	217.763	0	0	0	0	93.096	0	0	63.3837	3.94741	19.3467
A930007I19Rik	62.3552	84.4813	39.4854	32.5951	242.927	127.619	67.8753	36.7543	24.5701	125.515	43.2171	596.033	71.3868	0	18.6951	0	0	0	106.35	63.3179	628.839	86.2737	252.994	87.5676	107.152	22.715	96.9713	23.1615	0	0	0	0	0	0	60.8775	136.878	226.466	67.9661	31.757	35.6966	1.98989	34.1204	9.57227	316.945	0	0	89.7936	143.422	18.2474
A930009A15Rik	0.0657063	0	64.0961	0	0	0	0	234.125	0	0	3766.64	0	0	0	0	0	0	0	0	0	0	0	0	0	0.538451	0.613918	0	1.65439	0	0	0	0	0	0	55.5354	20.1114	232.586	3.02683	13.6102	0	0	0	0	0	0	0	0	0	0
A930012L18Rik	53.7477	190.359	68.9642	31.4226	2.96462	9.33798	618.622	2.94034	234.991	134.417	5.40213	14.4201	0.951824	26.9133	110.733	115.569	0	2.98647	287.456	72.7782	0	29.0529	0	1.55676	3.23071	3.06959	33.5121	24.8159	0	0	0	0	0	0	301.494	167.795	6218.62	6.32883	748.559	41.0198	0	0	0	0	0	0	0	103.51	589.414
A930013F10Rik	305.994	907.797	329.946	869.749	1343.88	824.855	1575.25	1244.74	462.212	3408.49	1199.27	480.672	898.522	269.632	431.906	1663.43	496.444	337.472	265.153	238.998	29.1129	651.699	1169.59	114.032	683.564	260.301	310.166	51.2861	108.211	0	51.0247	123.876	3.76604	0	290.587	342.195	501.897	420.179	2068.74	874.567	1361.08	1390.41	512.116	218.619	1186.74	0	353.893	1075.45	952.823
A930015D03Rik	228.264	565.854	200.943	371.443	198.888	373.519	501.549	385.062	874.234	888.842	650.282	62.4873	438.791	145.033	284.262	4422.87	50.6575	122.445	356.635	163.813	662.319	212.514	330.015	194.205	179.304	170.669	392.163	64.5212	0	0	898.82	437.358	54.6076	0	255.196	211.62	1762.76	455.951	1914.5	319.704	668.602	238.843	272.81	165.272	367.419	0	36.9738	146.054	224.026
A930018P22Rik	8.54181	0.502267	7.03164	0	0	0	0	0	0	0	0	0	0	0	0	0	0	0	37.171	1.74269	0	0	0	0	0	0	0.713024	19.8527	0	0	0	0	0	0	0	0	0	0	0	0	0	0	0	85.7738	1.34094	0	0	0	0
A930019D19Rik	2.23401	11.6526	4.59761	67.7696	15.1239	37.3519	0	8.08594	2.52001	50.295	33.7633	0	27.6029	0	0	0	0	0	25.6067	17.095	486.186	41.7358	4.08055	98.0757	40.1146	0	64.1722	23.1615	244.899	0	0	0	0	0	72.3407	77.4441	18.3621	196.744	322.107	0	0	0	0	9.4142	728.133	0	0	37.2811	94.9745
A930024E05Rik	27.3338	1.70771	30.831	17.5873	789.707	824.855	30.0656	30.6285	1.26001	496.274	417.315	0	117.074	0	0	2.84185	0	0	5.57565	4.89614	2174.74	10.7658	830.903	1798.05	150.497	1.22784	0	49.6317	0	0	0	0	0	0	110.069	101.458	73.4483	20.0871	226.836	47.5955	1078.52	686.673	2220.77	5.23011	0	0	0	22.8072	0.439697
A930038C07Rik	116.234	9.74398	307.499	53.2308	0.343724	0	1148.87	104.872	13156.8	15945.8	367.345	182.655	19.9883	0.498395	1632.71	20.8403	235.557	555.484	36.5515	432.769	1101.92	1591.57	128.282	191.481	589.066	0	110.519	2322.76	0	0	0	0	0	0	167.608	45.0256	422.328	83.9258	4.53672	2.81815	0	0	0	0	0	0	0	1848.26	4.39697
A930041C12Rik	8.21328	0.200907	4.59761	16.1803	42.4929	0	23.2325	6.24822	0	291.088	70.903	0	0	0	0	0	0	0	73.3095	41.5757	0	0	284.874	8.56217	43.8838	25.1706	0	0	0	0	0	0	0	0	17.4731	171.998	0	7.70466	571.627	0	0	0	0	15.6903	0	0	0	0	136.306
AA388235	98.2966	177.602	94.6567	55.3413	13.749	31.1266	36.4431	676.401	5.88003	195.394	218.786	168.235	22.8438	7.97432	35.9522	1749.63	48.1246	47.7836	1083.33	198.252	4.36694	243.041	53.8123	110.141	222.38	49.7273	94.8323	24.8159	0	1843.62	816.396	0	39.5434	0	92.3735	72.9415	36.7242	717.359	54.4406	107.403	1.98989	1121.71	23.9307	6.27613	105.935	53.3676	73.9477	25.0002	14.9497
AA415398	480.838	500.76	223.119	305.315	521.387	0	131.651	110.508	473.552	335.597	241.746	249.949	495.9	824.345	415.607	341.97	0	648.065	554.054	422.396	192.145	69.019	194.846	43.5892	282.687	125.239	6.41722	1215.98	800.194	0	0	0	0	0	341.782	448.455	483.535	499.702	7853.06	373.875	173.12	0	0	1402.72	83.1386	683.105	0	854.833	212.593
AA465934	52.565	102.161	31.9128	47.3684	149.993	34.2393	229.136	44.4727	27.5101	135.307	95.2126	240.336	42.8321	151.512	43.622	65.3626	172.236	131.405	42.5401	25.9744	13.1008	50.8794	105.329	181.362	26.6533	21.4871	114.084	246.504	0	180.561	241.386	427.246	37.6604	0	119.418	84.6482	0	107.865	68.0508	60.7469	0	12.7951	129.226	32.4267	37.5465	0	26.4099	12.2808	77.8264
AA467197	24.2456	61.377	36.5104	1.40698	0.859311	1609.25	46.0095	104.872	46.8302	140.648	72.2536	0	3.80729	0	186.472	240.61	519.239	5306.96	706.249	74.355	0	1243.23	16.5772	49.8162	193.035	1.22784	0	0	0	0	0	0	0	0	11735.2	6295.78	14769.2	73131.5	1279.35	0.313128	0	0	473.827	2.09204	0	362.899	10.564	1.3158	581.06
AA474331	48.4255	3.91768	40.8376	18.7597	111.796	18.676	17.3105	15.5593	11.9701	47.1794	52.6708	72.1007	41.8802	0	0	0	0	0	0	33.6921	0	12.5355	17.3424	0	45.7684	0	0	6.61756	0	0	0	0	0	0	24.4846	12.9073	263.19	8.25499	127.028	0	0	0	0	38.7028	0	0	0	114.913	14.0703
AA536875	0	0	0	146.795	0	0	0	0	0	0	0	0	0	0	0	0	0	0	0	0	0	0	0	0	0	0	0	0	0	0	0	0	0	0	2.22587	0.300171	6.12069	3.85233	0	0	0	0	0	0	0	0	0	0	0
AA543186	79.5703	44.9027	61.3916	152.657	404.607	46.6899	203.626	51.946	149.101	103.261	86.4342	0	173.232	0	0	0	0	0	55.3435	79.1681	592.448	124.323	292.015	232.346	78.8831	396.591	78.4327	41.3598	153.774	323.109	0	0	491.468	0	206.227	240.137	1407.76	225.636	353.864	0	0	0	0	107.74	347.305	224.144	0	470.618	58.6995
AA960436	2594.87	2332.43	2663.91	3421.54	1817.66	1898.72	1091.93	1264.59	1101.46	1003.23	1561.89	2143.8	1660.93	4619.62	3020.94	3574.1	6253.67	6217.84	2096.24	3366.97	9019.18	4447.01	6846.15	5689.17	3106.6	3636.85	1030.32	2221.85	3593.75	2499.34	1569.99	35.3931	2643.76	0	2463.37	2525.64	110.172	1471.87	1324.72	3946.35	5404.53	2567.56	1742.15	3394.34	977.549	3757.08	4299.53	1856.6	1979.08
AA986860	218.868	38.1723	177.414	10407	106.211	0	348.032	854.537	292.321	237.232	322.778	28.8403	4.75912	29.9037	112.65	634.681	0	0	159.835	245.139	5.82258	77.4252	13.5168	38.1406	115.767	20.8732	0.713024	49.6317	0	0	353.248	6798.01	9.4151	0	9765.78	3632.37	20816.5	9395.83	1106.96	171.594	3.97977	0	234.52	358.786	171.641	0	5.28198	575.444	13.1909
AA987161	1494.88	1493.14	589.306	605.94	3068.64	1506.53	1813.05	1273.17	1048.32	887.952	990.616	24.0336	670.084	854.249	519.149	536.163	3041.98	543.538	1470.32	934.084	1394.51	1126.13	1771.73	1122.42	1571.2	1866.92	1407.51	400.363	1324.16	209.071	522.022	1079.49	615.748	0	817.339	672.683	410.086	1051.69	4087.58	100.514	2481.39	5361.16	722.706	794.977	3656.76	560.359	2577.61	2073.7	1273.36
AB124611	175.041	1.5068	99.5248	623.996	639.843	14315.1	773.961	213.42	24.9901	143.764	126.95	0	121.833	107.653	118.882	4.73642	14913.6	14815.9	82.3957	124.976	4387.32	24724.6	13620.1	6984.78	12156.3	52.183	222.464	29.779	11.3907	10453.5	527.91	937.918	15.0642	22303.9	133.775	36.3207	153.017	34.671	1152.33	87.989	9183.32	5642.66	2991.33	9.4142	355.35	24842.6	11731.3	129.826	45.7285
AF251705	6.04498	8.23718	50.5737	4.22094	63458.2	36097.5	29.1545	12.619	4.20002	3.11562	4.72687	9.61343	1.90365	13.4567	6.71107	17.9984	12.6644	31375.9	26.4327	5.80898	2.91129	23451.3	4.59062	10.8973	34084.8	0.613918	7.13024	23.1615	14.2383	46100.1	7.84996	10.1123	13.1811	16.8459	10.5729	3.60205	73.4483	27.5166	412.841	9.39384	15.9191	8.5301	9.57227	53.3471	431.784	51617.1	739.477	2.193	9.23364
AF357355	7.95046	0	171.464	4.22094	0	0	1.36662	0.612571	0.210001	52.9656	2.0258	0	0.951824	87.2191	86.2852	0	0	0	0.619517	46.1399	0	0	0	0	0	39.9046	0	0	0	0	0	0	0	0	0	0	0	0	0	52.9187	0	0	0	0	0	0	0	0	0
AF357359	14.981	0	44.3534	0	0	0	10.9329	0	0	46.7343	0	0	0	0	27.803	0	0	0	0	12.6138	0	0	0	0	0	0	0	0	0	0	0	0	0	0	0	0	0	0	0	6.26256	0	0	0	0	0	0	0	0	0
AF357425	24.4427	0.803627	275.045	0	0	0	17.3105	0	0	263.493	52.6708	0	1.90365	300.034	273.237	0	0	0	0	136.096	0	0.147476	0	0	0	7.98093	0	0	0	0	0	0	0	0	0	29.4167	0	0	0	92.3728	0	0	0	0	0	0	0	71.0533	0
AF357426	0	0	22.4472	0	0	0	0	0	0	52.9656	0	0	0	0	37.8696	0	0	0	0.206506	6.88779	0	0	0	0	0	0	0	0	0	0	0	0	0	0	0	0	0	0	0	51.0399	0	0	0	0	0	0	0	0	0
AI118078	0.394238	31.7433	12.1701	144.45	0	0	0	5.39062	1.89001	761.992	1497.74	0	3.80729	0	0	0	0	0	0	0.580898	0	4.57177	0	0	0.807677	0	0	19.8527	0	0	0	0	0	0	359.812	236.234	0	72.6439	0	0	0	0	0	156.903	0	0	0	0	0
AI197445	0	0	198.509	3.28296	0	0	75.6195	14.4567	0	181.596	62.1245	0	0	0	0	0	0	0	0	0	0	0	0	0	0.269226	9.82268	0	0	0	0	0	0	0	0	0.33388	7.2041	18.3621	5.77849	22.6836	0	0	0	4.78613	0	661.086	0	0	3.94741	515.984
AI314180	2134.93	1583.65	2120.85	1859.09	1671.7	1266.85	1480.5	1441.26	2204.38	2490.72	1098.66	5095.12	1733.27	2691.33	3066.48	1586.7	959.96	3795.81	1514.3	2385.08	330.432	2212.29	1168.57	1462.18	1752.12	1478.93	1696.29	16894.6	1218.8	617.709	3171.38	8155.59	3666.24	269.534	2158.42	3054.54	3886.64	5522.87	5035.76	2869.82	1975.96	870.07	2000.6	4503.13	2584	3831.79	274.663	2090.81	1110.23
AI314976	4889.01	4313.87	3723.52	3159.38	6629.97	5773.99	4668.82	4661.42	5687.88	3167.7	4335.21	9704.76	11634.1	2516.89	2783.66	1096.96	9080.36	2227.91	4219.11	2741.76	9017.73	4184.5	7885.67	5177.78	4581.41	7417.35	7848.26	6584.47	10419.6	874.295	2235.28	3622.74	8569.63	7479.57	6153.64	7337.67	1322.07	3946.44	3366.25	2087.31	5975.63	5779.14	1124.74	9967.55	2220.6	720.462	8609.62	4804.43	6546.43
AI316807	4348.64	2057.69	3562.61	2094.06	3097.39	5565.44	5532.98	3839.72	1825.33	4142	2938.76	5873.81	2460.46	1926.79	2345.04	1725.95	2651.92	1866.55	2562.53	2942.33	2582.32	2293.55	2077	1788.71	1855.23	2468.56	3066.72	10381.3	1537.74	2556.36	496.51	4151.11	4404.38	572.76	1945.52	2483.61	893.621	2103.65	1719.42	1182.37	1434.71	1219.8	1694.29	5279.27	2111.99	3154.02	2667.4	2878.97	2094.5
AI317395	56.8359	0.803627	52.7373	38.223	12.1163	0	46.9205	137.828	0.420002	109.937	7.42794	0	0	0	0	0	0	0	3.51059	43.7333	0	9.29102	0	0	0	0	0	463.229	0	19.0064	1110.77	11682.3	22731.8	0	3.22751	14.7084	18.3621	4.1275	598.847	0	0	0	0	11230.1	0	53.3676	0	0	0.879394
AI413582	3907.55	3184.37	3173.97	2675.37	8332.65	6468.11	13313.1	8905.43	2316.73	4811.86	4847.07	3662.72	1033.68	733.637	2696.89	1447.45	6803.3	8711.54	2867.33	4682.21	4791.99	7592.83	4239.95	4741.1	6961.64	2896.46	3882.42	2838.93	942.577	5968.02	2898.6	4320.49	1011.18	4565.23	2179.46	2795.79	10386.8	7407.76	3919.73	719.882	7332.73	3569.84	8399.66	921.546	5626.6	7642.24	4051.28	2044.32	3366.32
AI414108	7.09628	29.7342	10.0066	13.3663	0.214828	0	66.9643	489.812	4.83002	1646.38	2890.14	0	121.833	0	34.5141	43.5751	0	0	21.2701	35.0199	0	0	0	8.17298	0	0	0	497.972	1119.13	0	0	0	0	0	244.289	74.4424	434.569	581.977	267.666	0.626256	0	0	0	0	0	0	0	0.877201	21.9848
AI427809	297.715	0.401814	88.166	48.3064	37.0793	24.9013	238.702	4.65554	0.420002	0	0	0	0	0	379.176	0	0	1155.77	206.712	593.595	0	462.044	59.4231	0	1155.52	0	291.627	134.006	0	0	0	0	0	0	1229.79	613.849	140.776	449.347	4.53672	0.626256	0	0	0	0	0	0	0	0	0
AI428936	21.9459	2.71224	0.270448	44.5544	3.39428	0	75.164	4.16548	34.0202	57.4165	21.6085	0	0	0	0	0	0	0	6.81468	11.369	0	10.4708	2.04028	0	27.461	469.033	2.13907	0	0	19.0064	0	2.52808	9352.96	0	351.799	291.766	287.673	21.1878	0	0	0	0	4.78613	421.547	0	0	0	29.8248	1.09924
AI429214	122.017	181.72	19.2018	41.5059	182.045	0	44.6428	13.8441	11.3401	1.78036	99.2642	336.47	447.357	0	0	0	0	0	14.8684	114.105	0	21.2366	0	0	28.8072	142.429	0	16.5439	740.393	0	0	0	0	0	25.3749	11.4065	226.466	4.953	108.881	0	0	0	0	6.27613	0	0	0	140.352	131.689
AI450353	254.677	1274.95	371.325	81.8394	997.789	943.136	600.856	177.156	209.371	614.668	826.527	586.419	90.4232	933.494	188.389	288.922	2054.16	2.98647	142.695	45.642	110.629	312.945	1075.23	500.498	245.803	551.298	1212.14	349.076	922.643	0	0	0	0	0	302.718	134.477	18.3621	300.757	31.757	1093.13	2652.52	2682.71	38.2891	37.6568	207.846	0	1315.21	903.079	1532.56
AI462493	3390.31	4538.18	2368.85	2323.39	4149.61	1693.29	4305.76	4002.05	4736.57	3334.16	2792.23	4460.63	2598.48	1104.44	1526.29	3506.85	5878.8	1947.18	4588.55	3741.23	2112.14	3508.32	3254.75	2644.93	3409.74	3140.19	4845.71	7568.84	2841.97	1149.89	2201.91	9631.99	5530.43	16.8459	5258.95	6675.2	15760.8	5043.25	3511.42	379.198	3183.82	2516.38	3379.01	5702.91	3312.13	4461.53	5155.21	2508.36	6523.34
AI463170	3.61384	0	0.270448	689.89	0	0	1.82216	45.6978	0	0	0.675267	0	531.118	0	0	0	0	0	0.413011	0.580898	0	54.5663	0	0	21.2688	193.384	0	0	0	0	0	0	0	0	272.112	1078.81	2993.02	59.9863	2440.76	0	0	0	0	222.803	0	0	0	0	0.439697
AI464131	3432.3	2.41088	1047.98	4.92443	11.3429	0	38434.7	713.278	1.47001	245.689	2992.78	17929.1	528.262	273.619	1361.87	52.1006	0	2.98647	61.7451	2700.51	1.45565	7.96373	1.78524	0	118.459	3.68351	2.13907	653.484	5.69533	0	0	500.56	885.02	16.8459	1800.17	890.607	1003.79	312.589	9.07344	495.682	0	0	0	2650.62	6.70472	5.33676	15.8459	2911.43	299.434
AI467606	12.8784	362.838	3.24537	4.68994	12897.9	17350	33.2544	109.038	12690.4	80.116	5.40213	0	467.345	6.97753	11.5047	12.3147	9604.66	8278.51	2723.19	7.05376	8286.99	14719.5	21499.7	7557.28	14239.6	1.84175	297.331	6.61756	14.2383	3487.68	1952.68	156.741	30.1283	5744.44	119.418	682.889	2466.64	293.878	598.847	7.8282	15282.3	7024.53	14085.6	12.5523	44.2512	2775.11	22628	3.5088	1184.1
AI480653	2073.69	2211.58	3153.96	726.237	2226.9	927.573	1540.18	2249.73	2429.71	2398.58	2195.29	4177.04	1058.43	146.03	2692.58	734.145	20.263	513.674	996.183	1932.98	0	1380.97	627.895	1728.78	1007.17	1375.18	2293.09	817.269	848.604	1301.94	5065.19	2573.59	1619.4	0	1422.89	826.07	911.983	455.4	1828.3	1126.01	1363.07	72.5058	3484.3	397.488	3105.63	1248.8	4119.94	2418.88	2406.02
AI504432	13.6669	1.60725	26.5039	18.0563	75.6194	1827.13	0.911078	216.973	0.210001	1342.83	241.746	384.537	3.80729	78.248	14.8602	3.78914	493.911	934.766	0.619517	22.1571	238.726	769.237	584.794	1008	786.408	0	0	0	0	2603.88	0	0	0	3554.48	0.667761	0	18.3621	23.3891	18.1469	21.2927	81.5853	1249.66	1531.56	1.04602	0	458.961	253.535	165.791	5.27636
AI506816	388.39	218.185	620.948	68.9421	422.394	989.826	12.2996	258.627	128.731	117.503	602.338	427.798	374.067	803.412	874.836	116.516	1583.05	134.391	147.238	525.464	2297.01	187.443	666.15	1452.45	247.418	273.193	141.892	122.425	609.4	475.161	418.01	37.9212	0	892.831	744.219	275.257	146.897	6.05366	127.028	1476.71	489.512	507.541	1301.83	52.3011	142.14	117.409	755.323	336.845	196.545
AI507597	12.0242	0	13.5224	1.17248	0	0	0	0	0	0	0	0	0	0	0	0	0	0	0	0	0	0	0	0	0	0	0	16.5439	0	0	0	0	0	0	62.8808	32.7186	24.4828	90.8049	113.418	0	0	0	0	44.979	0	0	0	115.352	0
AI593442	20.0404	1.30589	3824.13	0	39.3135	0	978.498	333.116	8.19004	24807	1987.99	0	198.931	0	0	0	0	0	37.3775	26.3064	0	5.16168	0	0	14.5382	22.715	0	476.464	1201.71	0	0	0	0	0	1.22423	0.600342	30.6035	13.4832	0	0	0	0	0	0	0	0	0	652.638	0
AI597468	18219.6	6480.15	18603.3	1412.37	3093.05	1948.53	6976.13	4945.53	5132.21	8278.21	15544.6	8704.96	4326.04	6450.23	19056.6	5836.22	2449.29	770.51	6080.76	18470.7	6460.16	1015.08	5587.04	2723.16	388.762	8400.85	14925.7	7277.66	8169.95	0	6313.33	250.28	137.46	4346.23	2402.71	21187.9	146.897	1258.06	8102.58	9585.79	7105.88	5429.41	4063.43	3595.18	2574.61	2326.83	1088.09	16415.1	6058.36
AI597479	1558.03	1074.45	570.374	469.697	504.33	164.971	1188.96	2249.12	584.223	2030.94	1127.7	2004.4	1738.98	76.7528	347.058	99.4649	1539.99	262.81	527.002	758.072	0	370.166	286.404	586.898	878.484	2235.27	703.042	6394.22	2189.85	9.50321	1277.58	915.165	3858.31	0	833.588	707.803	1077.24	514.561	1202.23	667.276	784.015	98.0961	71.792	1461.29	754.952	37.3573	52.8198	1200.45	420.79
AI607873	5942.74	673.339	63.8257	3.75195	382.866	13982.1	1.82216	4.16548	1.68001	52.9656	1.35053	0	0.951824	21.9294	64906.6	4628.43	63.3219	77325.8	595.355	21422.4	16.0121	28560.1	19.6377	14.0108	22209.8	3348.31	183.96	26.4702	8.54299	58701.3	2482.55	5.05616	28.2453	791.756	2.78234	3.60205	6.12069	9.90599	0	182.554	312.412	29.8553	2215.98	719.663	18637.8	24212.9	3428	2259.23	274.591
AI646023	21.4859	1.30589	418.653	7.97289	8.16346	0	767.128	815.454	0.630003	122.845	1340.4	2326.45	0	0	0	0	0	0	0	76.7615	0	0	0.510069	317.189	0	0	578.263	72.7932	0	0	0	0	0	0	6.90019	4.80273	116.293	85.8519	0	0	0	0	0	0	0	0	0	14.0352	0.219848
AI661453	137.786	17.6798	983.348	569.358	27.9706	0	0	0.612571	65.1003	0	0	0	0.951824	1.49518	69.5075	1.89457	0	0	18.792	193.605	0	5.16168	0	0	49.2683	31.9237	62.0331	0	0	0	29.4373	945.502	9.4151	0	900.03	853.085	8446.56	1776.75	889.197	0	0	0	0	364.016	0	0	5.28198	39.0355	5.93591
AI662270	31.9989	76.3446	3.24537	1.87597	534.492	4491.57	20.9548	162.086	49.5602	1.33527	0	4.80672	0.951824	2.49197	27.3237	143.04	7459.32	8203.84	216.624	2.73852	7006.02	10001.6	6146.84	6468.72	5808.01	0	1.42605	3.30878	2.84766	1425.48	365.023	17.6966	0	1381.36	1.44681	2.40137	0	12.1073	0	4.07067	7265.07	7374.27	7241.42	171.548	1365.08	6585.56	5736.23	148.686	64.4156
AI836003	2.82537	679.567	64.3666	329.703	9.66725	0	179.938	196.023	3170.59	2670.53	2855.7	946.923	70.4349	0	0	0	0	0	124.523	4.48121	30.5686	9.43849	2.80538	87.9568	375.57	0	0	2741.33	0	0	0	0	0	0	11.3519	0.900512	0	6.05366	3348.1	0	0	0	0	1.04602	5.36378	5.33676	5.28198	30.702	6311.63
AI837181	7112.57	3181.46	4550.01	3780.79	5299.03	2421.65	2854.86	3394.87	3816.98	4263.51	3851.05	1932.3	2678.43	8687.52	3714.58	2110.55	2289.72	3688.3	2974.71	6590.12	5174.82	3890.13	3001.76	3433.82	3956.54	5333.72	2886.32	3495.73	4952.09	1387.47	5367.41	3296.62	3948.69	977.061	3246.87	5251.79	2919.57	5120.02	7104.5	7901.48	6236.3	3241.44	3848.05	1753.13	8392.97	6292.04	3338.21	5815.84	3631.68
AI846148	1057.61	2355.83	1458.8	1752.86	763.713	3.11266	1079.17	1261.41	1768.42	1023.26	2464.05	826.755	1634.28	3112.48	1766.93	3056.89	648.416	98.5536	3522.78	1523.94	260.561	656.418	1042.33	928.995	512.606	1793.87	1202.16	967.819	3009.98	0	3373.52	63.202	267.389	0	728.082	1394.89	4388.54	1238.8	1619.61	2203.8	537.269	2145.32	43.0752	369.246	1279.26	10.6735	1177.88	2578.53	1722.29
AI848100	2452.49	1950	5173.12	9108.8	3040.59	5428.48	3148.23	2956.27	2515.39	3749.87	2767.24	3427.19	4594.45	8219.03	6299.3	4883.25	8353.42	6859.93	2336.82	2741.18	7598.47	4773.22	6253.45	5426.08	1691.81	2893.39	3432.5	1485.64	11404.9	3981.85	3530.52	1296.91	5165.12	12179.6	1856.93	3928.33	80193.3	3233.21	6664.44	4545.99	4158.86	5625.6	4106.5	2098.32	4197.16	3645	2656.83	3007.05	1619.62
AI848285	46.5857	0.200907	9.19522	3.51745	14.1786	6.22532	601.767	1922.25	10.08	1244.02	1595.66	0	0.951824	0	0.479362	0.947284	0	0	1.44554	15.3523	0	53.6814	668.956	19.0703	0.807677	8.59485	0	0	0	0	0	0	0	0	7.90183	33.9193	0	16.7852	40.8305	12.212	0	0	0	0	0	0	0	84.2113	1.09924
AI854703	142.123	0	370.243	173.059	43.4382	0	1142.49	32.0987	10.9201	1592.53	1861.71	293.21	57.1094	0	0	0	0	0	0	93.0267	793.327	12.388	109.41	1143.83	111.998	0	9.98234	527.751	0	0	0	232.583	2888.55	0	1389.94	198.113	42.8449	1162.58	1429.07	0	0	0	0	0	0	0	0	319.74	69.0324
AI987944	2311.55	2065.72	1373.6	1251.98	4942.41	9602.56	3513.12	2786.71	1617.85	1919.67	3217.65	1345.88	2432.86	394.23	1458.7	2556.72	5321.57	5.97295	2868.77	2230.4	1474.57	1443.5	4035.67	2370.94	3009.67	1649.6	1918.75	3290.58	1244.43	85.5289	488.66	1537.07	2726.61	33.6917	1401.07	1218.39	1658.71	1280.07	1193.16	738.669	1150.15	0	277.596	3648.53	1806.25	5544.89	417.276	2703.97	907.315
AK010878	1080.93	1364.36	1251.09	1017.95	1353.54	339.28	1609.42	1365.18	1488.7	4081.91	1438.99	1706.38	2414.78	2333.48	1044.05	4277.94	1360.15	1944.19	2124.53	775.416	781.682	1502.05	2597.78	1829.58	1363.63	2254.31	1774.72	2230.12	811.584	864.792	3308.76	121.348	148.759	1684.59	1878.3	1898.88	6169.66	1094.06	2980.62	2016.86	3973.8	934.045	751.423	1711.29	1029.85	1104.71	3190.31	1098.26	2541.01
AK129341	172.479	86.0886	81.6752	136.008	0.472621	0	757.562	162.576	110.461	1474.58	79.6815	206.689	355.03	155.499	16.2983	112.727	0	0	363.656	45.642	0	22.2689	0.510069	2.72433	0.538451	601.639	87.702	84.3739	455.626	0	366.986	568.818	173.238	0	191.87	359.905	1248.62	18.7113	1070.67	251.755	0	0	0	2.09204	378.146	0	0	151.317	85.9608
AU019823	1247.96	2700.69	994.707	1517.43	1328.37	1245.06	1941.96	1563.65	1685.68	2058.98	1765.15	860.402	1432.49	1492.69	1320.16	2709.23	1165.12	749.605	1384.83	1235.9	668.142	1241.75	1149.95	1061.71	1222.28	996.388	660.261	570.765	4345.54	4057.87	1868.29	1248.87	947.159	7782.79	1801.28	1658.74	1695.43	1335.93	2082.35	1501.14	2137.14	307.083	215.376	1965.48	2352.02	149.429	3116.37	1233.78	1906.75
AU021092	155.855	10864.4	230.421	0.937987	13.4912	0	14.5773	47.658	53269.9	101.925	239.72	0	508.274	3.98716	3.35554	13882.5	0	0	5760.68	4.48121	1.45565	1.62224	2.80538	99.2433	13.7305	0.613918	2900.58	1315.24	2.84766	0	90975.1	260.392	24.4793	0	25.3749	42.6243	67.3276	4.40266	0	3.44441	7.95954	0	0	62.7613	17587.8	5.33676	10.564	200.002	19952.6
AU022252	1048.93	1053.35	762.663	453.282	677.782	868.432	921.556	787.154	960.544	1185.27	1773.25	418.184	613.926	530.292	533.051	434.804	519.239	662.997	803.306	801.888	1157.24	363.235	381.787	688.087	517.99	814.055	770.066	984.362	1030.85	0	851.72	621.908	1764.39	0	919.395	867.193	3831.55	1144.69	127.028	410.198	1546.14	140.747	751.423	7939.31	903.797	368.236	322.201	445.18	1468.81
AU022754	7.29339	0.60272	0	257.947	0	0	153.517	0.735085	0	98.8097	126.275	0	0.951824	0	0	0	0	0	0	0	0	0	0	0	0.269226	0	0.713024	3.30878	0	0	0	0	0	0	0.33388	2.1012	0	4.40266	0	0	0	0	0	0	0	0	0	0	0
AU023871	477.027	2.20997	73.0209	119.124	14.4364	0	0	0	0	0	0	0	0	0	84.8471	133.567	0	0	612.495	109.209	0	44.8328	0	0	0.269226	0	0	0	0	0	1148.06	25.2808	0	0	276.008	139.579	97.9311	252.328	181.469	0.939384	0	0	0	0	0	0	0	0	62.437
AU040320	947.418	1827.85	1190.51	2000.49	3450.05	1385.13	4014.67	3659.87	1765.06	2343.84	2882.71	543.159	718.627	543.749	1504.72	1234.31	3186.36	1188.62	2461.34	1329.59	1780.26	2044.32	1830.64	1847.09	1557.2	589.361	1987.91	5596.8	327.481	266.09	1000.87	2421.9	2069.44	0	2991.12	5821.51	3262.33	7525.53	1919.03	714.245	937.236	644.022	2517.51	1896.44	2392.25	1793.15	2398.02	2427.22	1124.96
AU040972	19.1205	101.759	80.323	20.8702	116.394	0	91.5634	141.014	4.62002	51.6303	43.2171	9.61343	0	0	79.0948	94.7284	0	0	5.98866	10.2902	0	64.1523	0	2.33514	2.69226	58.9361	48.4857	1.65439	0	0	0	0	0	0	12.6875	11.7067	6.12069	49.8051	0	33.1916	0	0	0	10.4602	186.391	0	0	28.0704	51.6644
AU041133	366.904	245.508	160.105	548.488	886.68	3156.24	373.998	365.092	183.751	449.54	897.43	370.117	1080.32	18.939	54.168	285.133	514.174	447.971	128.446	295.843	0	274.896	746.741	539.027	303.417	30.082	2.8521	547.603	0	0	47.0998	1329.77	56.4906	842.294	734.091	487.778	1236.38	485.669	1057.06	0	839.732	780.504	995.516	718.617	113.98	0	1019.42	37.2811	858.948
AV039307	41.9206	17.5793	77.8889	14.3043	75.7912	0	54.6647	308.858	98.9105	50.7401	280.236	163.428	81.8568	0	18.6951	0	0	0	16.9335	35.1028	0	25.6609	0.765104	45.5352	0.269226	74.898	0	0	31.3243	0	0	0	0	0	30.4944	50.7289	899.742	50.6306	0	54.7974	1.98989	0	0	13.5983	38.8874	0	0	68.8603	84.4218
AV051173	80.4902	71.8242	204.458	110.683	94.9539	765.715	69.6975	171.03	243.391	27.5955	251.875	19.2269	59.9649	62.2994	228.177	284.185	222.893	403.174	318.225	302.648	4.36694	360.285	14.537	52.1514	77.2678	77.9675	151.161	64.5212	0	399.135	586.784	123.876	244.793	0	436.938	383.618	1762.76	872.278	72.5875	108.969	177.1	98.0961	0	129.707	324.509	1264.81	0	159.651	236.777
AW011738	581.172	986.251	138.469	292.887	254.915	0	1567.97	6.98331	1122.88	234.562	272.808	307.63	10664.2	228.763	83.8884	1030.65	0	44.7971	1032.53	157.34	0	865.244	276.968	2648.82	952.251	2425.59	519.082	107.535	20699.7	0	211.949	0	0	252.688	302.607	9.30529	24.4828	16.2348	4.53672	311.563	0	3245.7	2172.9	256.275	653.04	512.329	0	232.02	490.482
AW046200	39.818	83.979	2.16358	51.8238	152.313	333.055	333.91	252.992	30.8701	14.2428	264.705	0	168.473	0	42.1839	0	0	0	155.912	8.63049	0	11.9456	1.78524	20.2378	12.9228	13.5062	340.113	380.51	0	0	0	0	0	0	28.4911	66.3377	91.8104	22.5636	290.35	62.9388	0	0	0	0	0	0	0	51.7549	23.7436
AW112010	5867.77	61884.6	17078.5	181.735	1509.77	6004.32	22.3214	1371.06	20801.2	8.45669	56.0471	14.4201	23.7956	602.559	14198.7	35466.3	17659.2	2469.81	31999.5	13261.1	451514	12391.7	3574.31	49063.2	18721.1	802.39	13.5475	2415.41	11.3907	7279.46	22841.4	10.1123	37.6604	93898.9	2513.12	17139.8	1609.74	13602.3	2903.5	73.272	3155.96	28737.9	239713	52559.5	29774.3	195443	6311.96	5814.97	22939.9
AW146020	317.69	243.298	196.075	71.287	470.688	709.687	309.311	607.67	467.462	274.175	328.855	129.781	74.2422	406.69	212.358	440.487	455.918	5.97295	222.406	163.979	2333.4	214.578	280.538	223.395	374.762	31.9237	95.5453	387.127	0	0	194.286	0	276.804	1785.66	729.751	468.266	1738.28	70.9929	199.616	132.766	202.968	417.975	76.5781	351.463	363.396	0	1563.47	410.969	280.527
AW146154	1236	545.462	857.59	356.904	1577.82	2767.16	425.929	540.288	1501.09	686.772	716.458	773.881	621.541	74.2608	349.455	5.68371	833.316	0	828.5	890.849	243.093	216.348	524.096	263.481	665.526	454.913	489.848	587.309	2078.8	598.702	2105.75	3953.92	2447.93	0	1031.13	700.899	2399.31	827.15	930.027	95.191	1731.2	1288.04	693.989	991.629	540.401	683.105	1595.16	352.635	405.181
AW209491	2914.66	3448.97	1333.85	2664.12	4773.43	5307.09	3253.92	2552.71	4360.88	5572.07	3925.33	4056.87	4096.65	461.514	683.091	1541.23	1099.27	1054.23	2324.43	2025.92	4831.29	826.901	1607.23	804.065	1797.08	3769.45	7512.43	3914.29	2916.01	0	1982.11	0	3421.45	522.222	3176.09	4111.44	330.517	628.755	1175.01	1216.19	1574	4584.93	38.2891	5871.32	1681.54	3901.17	0	2996.08	4349.04
AW495222	0	0	45.4352	6.56591	0	0	73.7973	384.572	83.3704	97.9196	1138.5	0	0.951824	0	0	0	0	0	0	0	0	0	0	0	0	0	0	0	0	0	0	0	0	0	5.34208	2.1012	0	6.05366	0	0	0	0	0	35.5648	0	0	0	0	0
AW549542	1.64266	53.2403	595.255	267.326	0	0	2.73323	0	32.5502	9.34687	0	0	2640.36	1.49518	24.4475	202.719	0	0	91.0689	56.845	0	0	0	0	0	1305.8	0	0	1947.8	0	467.073	0	0	0	29.8266	19.8113	18.3621	4.67783	18.1469	0	0	0	0	135.983	1.34094	0	26.4099	732.024	1023.39
AW549877	3230.32	2627.16	3556.12	1145.52	3649.37	2633.31	6598.48	4161.68	1718.86	3427.63	4672.85	3513.71	1275.44	3004.32	4478.2	4685.27	8277.44	1741.11	3200.84	3601.4	69.871	1960.26	1631.46	1376.95	1772.04	4612.36	2066.34	2349.23	1563.37	1197.4	1000.87	6752.5	442.51	0	954.341	1498.75	1224.14	3719.97	1202.23	1247.19	1114.34	3945.17	157.942	2905.85	3735.87	1478.28	306.355	3498.28	2283.57
AW551984	237.134	0.60272	4000.19	0.937987	0.558552	0	30.0656	2.94034	21.0001	326.695	1597.68	0	5.71094	1244.49	2524.8	105.149	0	0	15.4879	1968.83	0	31.8549	0.765104	1.55676	152.382	0	1.42605	0	0	0	0	0	0	0	17.9182	167.195	12.2414	33.8455	2980.62	436.188	0	0	0	0	0	0	0	559.654	16.7085
AW554918	524.402	522.559	314.801	290.542	370.922	426.435	206.359	1249.4	466.412	669.859	1003.45	24.0336	386.44	585.614	624.13	156.302	580.028	218.013	436.14	468.785	323.153	401.283	862.782	79.0054	398.723	728.72	265.245	231.615	19.9337	665.225	68.6871	0	779.57	0	369.494	255.145	263.19	225.912	648.751	385.461	417.876	0	86.1504	151.673	505.536	0	1140.91	468.425	216.111
AW555464	1115.5	1637.19	924.661	4205.94	2.36311	3.11266	1005.37	1525.42	448.352	3785.48	959.554	9.61343	1135.53	508.363	1260.72	2193.91	0	394.215	1224.99	970.017	5.82258	107.805	103.799	108.195	179.843	4140.26	17.1126	112.499	82.5823	0	45.1373	882.3	2839.59	1903.58	3667.9	4377.99	16685	8959.42	4772.63	1359.92	5.96966	0	143.584	1587.86	8.04567	0	63.3837	560.97	221.827
AY074887	18.2006	14.7666	36.5104	19.9322	41.2469	21.7886	96.1188	55.4989	8.82004	26.2602	40.516	33.647	2.85547	142.043	46.4982	38.8387	0	8.95942	84.8738	20.5804	2.91129	29.9377	213.209	12.0649	8.61522	12.2784	9.26932	66.1756	2.84766	19.0064	11.7749	7.58424	37.6604	0	63.2147	27.3155	850.776	66.8654	399.231	52.9187	3.97977	0	33.5029	55.4392	6.70472	0	10.564	2.193	18.907
AY358078	0.328531	1.00453	1.62269	2.34497	1.76159	3.11266	0	1.7152	1.26001	0.890178	0.675267	0	1.90365	0	0	0	0	2.98647	0.619517	0.746869	2.91129	0.737382	0.765104	3.11351	1.61535	0	0.713024	8.27195	0	0	0	0	0	0	13.1326	194.811	18.3621	17.6107	4.53672	0.939384	1.98989	0	0	7.32216	0	0	0	0	0.219848
AY512931	0	0	24.3403	23.9187	0	0	0	0	0	0	0	0	0	0	0	0	0	0	1.23903	5.22808	0	0.442429	0	0	0	0	0	0	0	0	0	0	0	0	313.068	650.17	12.2414	53.9326	344.791	0	0	0	0	0	0	0	0	0	0
Aaas	2962.96	4274.89	2109.22	1847.84	2616.9	3156.24	1546.56	2072.08	4316.78	2514.75	3709.24	2360.1	2647.97	3007.81	2318.2	3638.52	4982.17	286.701	2656.9	2392.72	11338	2191.06	7384.27	4037.84	3510.16	3620.89	2898.44	2084.53	2389.19	4285.95	1098.99	8489.29	6552.91	14184.2	3772.85	1982.33	403.966	939.143	3357.17	1647.99	3812.62	865.805	8361.37	3675.72	4174.36	2129.37	8979.36	1981.16	2623.23
Aacs	1856.79	1455.47	1841.21	1953.59	1460.01	4118.05	4665.18	6505.63	658.983	2283.31	3572.84	1014.22	714.82	864.217	3733.75	3483.16	488.845	824.267	1724.53	2429.32	39.3024	3105.85	2416.71	2017.56	1558.01	2470.4	1636.39	3.30878	3408.65	788.766	2551.24	235.111	11130.5	16.8459	7339.02	15617	4125.35	3785.19	9304.81	2735.49	1263.58	34.1204	6518.71	11548.1	2073.1	1115.38	3163.9	1885.54	978.546
Aadac	0.722769	41.1859	1.35224	0.468994	3.22242	9.33798	0.911078	3.92045	10.29	0.890178	0	0	8.56641	1.99358	4.79362	1.89457	5.06575	5.97295	3.7171	0.746869	0	27.4306	2.04028	1.16757	0.538451	0	1.42605	117.462	0	0	5.88747	20.2246	58633.5	0	16286.2	448.455	134.655	3409.86	1919.03	0.939384	3.97977	0	990.729	224051	1098.23	4925.83	4336.5	1.7544	1.53894
Aagab	2155.1	2108.12	1907.47	2799.42	9834.26	8139.61	2254.01	3416.92	3249.98	4423.29	2124.39	6748.63	3445.6	948.944	1604.43	1768.58	172.236	1675.41	2097.27	2515.37	7340.82	4355.72	2360.85	5276.63	5883.39	1488.75	948.323	2929.93	5925.99	3858.3	4203.65	9508.11	2468.64	3908.24	5176.59	4440.43	10184.8	5668.7	5820.61	1861.23	2724.15	1535.42	2168.12	3691.41	1644	4055.94	6111.25	480.268	968.213
Aak1	2143.08	3705.42	4096.47	2401.01	2066.94	2860.54	5210.91	8902	2073.13	10529.9	2518.07	168.235	1274.49	809.892	2774.55	3655.57	3275.01	2114.42	3089.12	3313.53	4697.37	1556.17	913.024	4257.73	1975.04	3812.43	6042.17	5353.61	1765.55	1777.1	2060.61	753.368	3707.67	8608.24	1583.82	2676.32	863.018	4838.8	1075.2	707.67	654.672	4077.39	7653.03	932.006	6049	1574.34	2318.79	2535.11	3148.45
[truncated: 20,098 more rows]
[truncated: 61 more columns]
