# Supplementary material for: Cell type–specific analysis by single-cell profiling identifies a stable mammalian tRNA–mRNA interface and increased translation efficiency in neurons
Source: HighWire-hosted journal article supplement (doi:10.1101/gr.275944.121), 2021-12-02
Supplement: Supplemental_Table_S3.xlsx [file Supplemental_Table_S3.xlsx]

## Sheet: codon_usage
# Table S3. Adult mouse codon usage by cell type matrix
	Heart fibroblast	Heart endothelial cell	Bladder bladder cell	Bladder bladder urothelial cell	Brain microglial cell	Brain macrophage	Brain astrocyte	Brain oligodendrocyte	Brain endothelial cell	Brain neuron	Brain oligodendrocyte precursor cell	Brain Bergmann glial cell	Brain brain pericyte	Muscle skeletal muscle satellite stem cell	Muscle mesenchymal stem cell	Muscle endothelial cell	Muscle lymphocyte	Muscle macrophage	Fat endothelial cell	Fat mesenchymal stem cell of adipose	Fat natural killer cell	Fat myeloid cell	Fat B cell	Fat T cell	Heart leukocyte	Heart myofibroblast cell	Heart endocardial cell	Heart cardiac muscle cell	Heart smooth muscle cell	Kidney macrophage	Kidney endothelial cell	Kidney kidney collecting duct epithelial cell	Kidney epithelial cell of proximal tubule	Kidney leukocyte	Intestine epithelial cell of large intestine	Intestine large intestine goblet cell	Intestine Brush cell of epithelium proper of large intestine	Intestine enterocyte of epithelium of large intestine	Intestine enteroendocrine cell	Muscle skeletal muscle satellite cell	Muscle B cell	Muscle T cell	Liver natural killer cell	Liver hepatocyte	Liver endothelial cell of hepatic sinusoid	Liver Kupffer cell	Liver B cell	Lung stromal cell	Lung lung endothelial cell
AAA	8.67524e+06	9.44247e+06	8.80122e+06	9.08847e+06	8.51312e+06	8.95667e+06	8.50017e+06	8.96745e+06	8.88529e+06	9.96087e+06	8.81256e+06	8.9896e+06	8.91208e+06	1.0064e+07	8.82437e+06	9.20118e+06	1.01871e+07	9.07129e+06	9.18329e+06	8.54603e+06	9.58857e+06	8.9158e+06	9.54097e+06	9.95816e+06	8.84102e+06	9.14542e+06	9.29246e+06	1.44764e+07	9.32151e+06	8.5797e+06	9.04618e+06	8.53916e+06	8.96595e+06	9.63044e+06	9.49276e+06	8.81738e+06	8.72512e+06	8.7755e+06	9.48677e+06	1.00193e+07	9.7378e+06	1.03324e+07	9.69426e+06	9.84884e+06	9.32447e+06	8.91936e+06	9.7901e+06	8.65342e+06	8.66646e+06
AAC	9.27093e+06	8.38494e+06	8.98951e+06	8.60554e+06	8.60275e+06	8.79311e+06	8.79171e+06	8.41229e+06	8.32906e+06	8.03947e+06	8.1607e+06	8.52524e+06	8.57335e+06	8.26021e+06	9.15962e+06	8.50001e+06	8.3368e+06	9.15982e+06	8.43389e+06	9.06557e+06	8.10469e+06	8.82268e+06	8.34802e+06	8.03337e+06	8.9634e+06	8.42546e+06	8.37023e+06	7.21027e+06	8.49134e+06	9.21217e+06	8.429e+06	8.75365e+06	8.47635e+06	8.25961e+06	8.40101e+06	8.57448e+06	8.21434e+06	8.75797e+06	8.1909e+06	8.29202e+06	8.44984e+06	8.12428e+06	7.99254e+06	8.80021e+06	8.6912e+06	8.99641e+06	8.26742e+06	8.73707e+06	8.51598e+06
AAG	1.54358e+07	1.49914e+07	1.51243e+07	1.6855e+07	1.43155e+07	1.48683e+07	1.45664e+07	1.526e+07	1.46998e+07	1.50637e+07	1.41364e+07	1.46334e+07	1.59932e+07	1.62791e+07	1.53334e+07	1.51067e+07	1.6437e+07	1.56226e+07	1.50688e+07	1.51105e+07	1.57783e+07	1.52792e+07	1.55278e+07	1.61283e+07	1.49984e+07	1.49502e+07	1.4877e+07	1.65915e+07	1.62449e+07	1.48291e+07	1.47994e+07	1.40271e+07	1.49237e+07	1.5524e+07	1.62104e+07	1.51569e+07	1.59617e+07	1.50876e+07	1.51008e+07	1.6185e+07	1.59775e+07	1.66427e+07	1.57301e+07	1.55462e+07	1.42475e+07	1.51732e+07	1.56812e+07	1.46614e+07	1.47849e+07
AAT	5.91228e+06	6.11623e+06	5.99276e+06	5.85938e+06	6.08157e+06	6.17564e+06	6.12763e+06	5.88075e+06	6.03217e+06	6.48226e+06	6.24026e+06	6.13891e+06	5.71863e+06	5.94906e+06	5.97655e+06	5.98189e+06	6.08419e+06	6.1572e+06	5.93578e+06	5.83616e+06	6.04209e+06	6.0866e+06	6.05826e+06	6.12916e+06	6.07578e+06	6.18588e+06	6.22892e+06	6.11966e+06	5.94402e+06	5.89778e+06	6.10517e+06	6.14793e+06	6.35308e+06	6.17071e+06	6.0648e+06	5.93711e+06	5.57993e+06	6.18195e+06	5.97793e+06	6.10433e+06	6.03927e+06	6.24517e+06	6.15381e+06	6.35127e+06	6.51091e+06	6.29458e+06	6.20325e+06	5.79268e+06	5.90596e+06
ACA	6.02663e+06	6.14237e+06	5.75493e+06	5.83038e+06	6.09745e+06	6.2175e+06	6.16314e+06	5.89656e+06	5.94705e+06	6.17112e+06	6.27547e+06	6.14775e+06	5.99251e+06	5.87504e+06	5.94952e+06	6.03058e+06	6.02622e+06	5.90919e+06	5.99454e+06	5.81367e+06	6.05062e+06	5.95544e+06	5.99912e+06	6.09629e+06	6.03202e+06	6.0043e+06	6.22011e+06	8.18771e+06	6.02475e+06	5.83908e+06	6.16067e+06	6.56193e+06	5.9723e+06	6.07715e+06	6.14312e+06	6.19377e+06	6.07341e+06	6.01379e+06	6.06346e+06	5.98518e+06	5.934e+06	6.064e+06	6.19563e+06	6.41961e+06	6.46711e+06	6.2733e+06	6.12e+06	5.96004e+06	6.05177e+06
ACC	7.71864e+06	7.63306e+06	7.90331e+06	7.94547e+06	7.86787e+06	7.93075e+06	7.66169e+06	8.59976e+06	7.82756e+06	7.14405e+06	7.53229e+06	7.63111e+06	8.00609e+06	7.64186e+06	7.98819e+06	8.0578e+06	7.91649e+06	8.32881e+06	7.846e+06	7.91233e+06	7.85357e+06	8.19179e+06	7.84977e+06	7.61985e+06	8.0348e+06	7.53962e+06	7.53262e+06	8.1104e+06	7.75189e+06	8.49862e+06	7.78435e+06	7.85353e+06	7.49932e+06	7.68301e+06	7.65733e+06	7.90849e+06	7.91398e+06	7.66524e+06	7.50614e+06	7.69204e+06	7.88344e+06	7.6114e+06	7.63094e+06	8.14475e+06	7.60145e+06	8.00978e+06	7.7152e+06	7.62143e+06	7.95002e+06
ACG	2.07425e+06	2.26442e+06	2.13456e+06	2.14587e+06	2.34454e+06	2.3269e+06	2.34521e+06	2.36667e+06	2.47566e+06	2.22101e+06	2.36638e+06	2.34466e+06	2.30269e+06	2.1523e+06	2.17182e+06	2.42064e+06	2.23567e+06	2.31559e+06	2.34732e+06	2.09978e+06	2.27055e+06	2.31017e+06	2.29475e+06	2.20632e+06	2.27932e+06	2.30849e+06	2.31722e+06	2.32588e+06	2.21265e+06	2.44061e+06	2.4114e+06	2.26169e+06	2.05833e+06	2.22941e+06	2.21182e+06	2.27795e+06	2.36868e+06	2.26196e+06	2.27209e+06	2.192e+06	2.3152e+06	2.26209e+06	2.17485e+06	1.96211e+06	2.37401e+06	2.16164e+06	2.17888e+06	2.14686e+06	2.47304e+06
ACT	5.33125e+06	5.37654e+06	5.49696e+06	5.13339e+06	5.35995e+06	5.45747e+06	5.30638e+06	5.23857e+06	5.44552e+06	5.40159e+06	5.39859e+06	5.39267e+06	5.22022e+06	5.39518e+06	5.38569e+06	5.33099e+06	5.47253e+06	5.59482e+06	5.32313e+06	5.37663e+06	5.36938e+06	5.49387e+06	5.31744e+06	5.44198e+06	5.40448e+06	5.27175e+06	5.29483e+06	7.20788e+06	5.25931e+06	5.2835e+06	5.3509e+06	5.48293e+06	5.34575e+06	5.35292e+06	5.46304e+06	5.34804e+06	5.28549e+06	5.28222e+06	5.22204e+06	5.44595e+06	5.34088e+06	5.49379e+06	5.40345e+06	5.57179e+06	5.39267e+06	5.45669e+06	5.45158e+06	5.33005e+06	5.25794e+06
AGA	3.92258e+06	4.44835e+06	4.31509e+06	4.20485e+06	4.25242e+06	4.32225e+06	3.94352e+06	4.28287e+06	4.32582e+06	4.73385e+06	4.30631e+06	4.1543e+06	4.24416e+06	4.4869e+06	4.16032e+06	4.33057e+06	4.77215e+06	4.1681e+06	4.36333e+06	4.06688e+06	4.57568e+06	4.25985e+06	4.67402e+06	4.67705e+06	4.1509e+06	4.47448e+06	4.36636e+06	5.91064e+06	4.36197e+06	4.2109e+06	4.45523e+06	4.39528e+06	4.14542e+06	4.58673e+06	4.47542e+06	4.1778e+06	4.52635e+06	4.22395e+06	4.97933e+06	4.45273e+06	4.67738e+06	4.7305e+06	4.67944e+06	4.39707e+06	4.54602e+06	4.19324e+06	4.69403e+06	4.12812e+06	4.27515e+06
AGC	7.19988e+06	7.59307e+06	7.39531e+06	7.44678e+06	7.46735e+06	7.36535e+06	7.3694e+06	7.26762e+06	7.77563e+06	7.41339e+06	7.5144e+06	7.11902e+06	7.88237e+06	7.3403e+06	7.3085e+06	7.89518e+06	6.92248e+06	7.3333e+06	7.76735e+06	7.33264e+06	7.14056e+06	7.52955e+06	7.42231e+06	7.03238e+06	7.34332e+06	7.47576e+06	7.37353e+06	6.29573e+06	7.54431e+06	7.6851e+06	7.82583e+06	7.1092e+06	6.86301e+06	7.32729e+06	7.16527e+06	7.35973e+06	8.14841e+06	7.60888e+06	7.96031e+06	7.21257e+06	7.13426e+06	6.85902e+06	6.92301e+06	6.22408e+06	7.61078e+06	6.80815e+06	7.15844e+06	7.43693e+06	7.75448e+06
AGG	4.76794e+06	4.41103e+06	4.1919e+06	4.44924e+06	4.09262e+06	4.21313e+06	4.15617e+06	4.3914e+06	4.40523e+06	4.52321e+06	4.3125e+06	4.20378e+06	4.52052e+06	4.45584e+06	4.55596e+06	4.40274e+06	4.55065e+06	4.28359e+06	4.43685e+06	4.4322e+06	4.41363e+06	4.27313e+06	4.48499e+06	4.44116e+06	4.19692e+06	4.45933e+06	4.27456e+06	4.00751e+06	4.48892e+06	4.26366e+06	4.44335e+06	4.16636e+06	4.15402e+06	4.45682e+06	4.49636e+06	4.20508e+06	4.81785e+06	4.36488e+06	5.03189e+06	4.37369e+06	4.41242e+06	4.41842e+06	4.48778e+06	4.19236e+06	4.40962e+06	4.10457e+06	4.45956e+06	4.51591e+06	4.42405e+06
AGT	4.36753e+06	4.8222e+06	4.47974e+06	4.59218e+06	4.66213e+06	4.60576e+06	4.54867e+06	4.6376e+06	4.92207e+06	5.10241e+06	4.93143e+06	4.73724e+06	4.63202e+06	4.68227e+06	4.41283e+06	4.77704e+06	4.55426e+06	4.27077e+06	4.75218e+06	4.34574e+06	4.54294e+06	4.46989e+06	4.69679e+06	4.73963e+06	4.44327e+06	4.73872e+06	4.61942e+06	4.77608e+06	4.65236e+06	4.36863e+06	4.86062e+06	4.89056e+06	4.50654e+06	4.76083e+06	4.65521e+06	4.57271e+06	4.71186e+06	4.85888e+06	5.10465e+06	4.63575e+06	4.60971e+06	4.74967e+06	4.7104e+06	4.23495e+06	4.94118e+06	4.42251e+06	4.7663e+06	4.52816e+06	4.67291e+06
ATA	2.14642e+06	2.46526e+06	2.17601e+06	2.24853e+06	2.51187e+06	2.59546e+06	2.54982e+06	2.24134e+06	2.3942e+06	2.57153e+06	2.50378e+06	2.54222e+06	2.10904e+06	2.27906e+06	2.12125e+06	2.35589e+06	2.37212e+06	2.34334e+06	2.35554e+06	2.08485e+06	2.35662e+06	2.36054e+06	2.39806e+06	2.37749e+06	2.46346e+06	2.44983e+06	2.51238e+06	3.37428e+06	2.20785e+06	2.37282e+06	2.41805e+06	2.62092e+06	2.66818e+06	2.41547e+06	2.35488e+06	2.37159e+06	2.19603e+06	2.40295e+06	2.3754e+06	2.31616e+06	2.35883e+06	2.38378e+06	2.43459e+06	2.65461e+06	2.62563e+06	2.51806e+06	2.43994e+06	2.22487e+06	2.32131e+06
ATC	9.51926e+06	9.13382e+06	9.18798e+06	9.84209e+06	9.14139e+06	9.12472e+06	9.62016e+06	9.27558e+06	9.34854e+06	8.78512e+06	9.00283e+06	9.62009e+06	9.52511e+06	9.21215e+06	9.32903e+06	9.16478e+06	9.26409e+06	9.60478e+06	9.15696e+06	9.31269e+06	9.26528e+06	9.44891e+06	9.07621e+06	9.20544e+06	9.32013e+06	9.21433e+06	8.94154e+06	9.41588e+06	9.53867e+06	9.25888e+06	9.10252e+06	9.47557e+06	9.8148e+06	9.03482e+06	9.48108e+06	9.44306e+06	9.12998e+06	9.46519e+06	8.47058e+06	9.23573e+06	9.20613e+06	9.26163e+06	9.16709e+06	8.84106e+06	8.95421e+06	9.27046e+06	9.01987e+06	9.04108e+06	9.41424e+06
ATG	8.85635e+06	9.21081e+06	8.66888e+06	9.97051e+06	8.99183e+06	9.50007e+06	9.64896e+06	9.28954e+06	9.12909e+06	9.33456e+06	9.04057e+06	9.47116e+06	9.42972e+06	9.33456e+06	8.71457e+06	9.11114e+06	9.65909e+06	9.715e+06	9.28589e+06	8.66322e+06	9.59056e+06	9.58282e+06	9.48337e+06	9.45992e+06	9.56446e+06	9.13301e+06	9.15023e+06	6.97881e+06	9.52171e+06	9.627e+06	9.16251e+06	9.6483e+06	9.76675e+06	9.46625e+06	9.36548e+06	9.11701e+06	8.93253e+06	9.28882e+06	9.00298e+06	9.32171e+06	9.51177e+06	9.49292e+06	9.53305e+06	9.33456e+06	8.88351e+06	9.61863e+06	9.58736e+06	8.69535e+06	9.29966e+06
ATT	5.46969e+06	6.21319e+06	5.88907e+06	6.37487e+06	6.07445e+06	6.01252e+06	6.32378e+06	6.22953e+06	6.03389e+06	6.50963e+06	6.26902e+06	6.57158e+06	6.03366e+06	6.50931e+06	5.78872e+06	6.07951e+06	6.42466e+06	6.05683e+06	6.00125e+06	5.59936e+06	6.28896e+06	6.006e+06	6.2274e+06	6.51561e+06	5.93318e+06	6.3504e+06	6.17563e+06	8.2918e+06	6.3067e+06	5.78115e+06	6.024e+06	6.62923e+06	6.88861e+06	6.28577e+06	6.48561e+06	6.04699e+06	5.62622e+06	6.14332e+06	5.82706e+06	6.72145e+06	6.37751e+06	6.70721e+06	6.37687e+06	6.4409e+06	6.1812e+06	5.99617e+06	6.34653e+06	5.69956e+06	5.92566e+06
CAA	4.37336e+06	4.42254e+06	4.39725e+06	3.96273e+06	4.21555e+06	4.59772e+06	4.46255e+06	4.2697e+06	4.4906e+06	4.55452e+06	4.29241e+06	4.51905e+06	4.38422e+06	4.07919e+06	4.27743e+06	4.37842e+06	4.2857e+06	4.36376e+06	4.31987e+06	4.25325e+06	4.15271e+06	4.39657e+06	4.36994e+06	4.19856e+06	4.51482e+06	4.42243e+06	4.41511e+06	4.54337e+06	4.40855e+06	4.41438e+06	4.43894e+06	4.22278e+06	4.33291e+06	4.33562e+06	4.19411e+06	4.28534e+06	4.39663e+06	4.24823e+06	4.74872e+06	4.09701e+06	4.29949e+06	4.1908e+06	4.26688e+06	4.68431e+06	4.73409e+06	4.64973e+06	4.45839e+06	4.447e+06	4.22004e+06
CAC	5.67449e+06	5.60733e+06	5.51954e+06	5.67861e+06	5.60359e+06	5.65346e+06	5.67046e+06	5.94822e+06	5.663e+06	5.46347e+06	5.67862e+06	5.56193e+06	5.79683e+06	5.35357e+06	5.49635e+06	5.68483e+06	5.5144e+06	5.63476e+06	5.67274e+06	5.56476e+06	5.54441e+06	5.66726e+06	5.55022e+06	5.44912e+06	5.64007e+06	5.60865e+06	5.53981e+06	4.00648e+06	5.63718e+06	5.75108e+06	5.67423e+06	5.20909e+06	5.56123e+06	5.52293e+06	5.47113e+06	5.633e+06	5.46212e+06	5.64385e+06	5.71228e+06	5.27582e+06	5.47645e+06	5.3852e+06	5.41955e+06	5.58613e+06	5.6524e+06	5.55961e+06	5.51251e+06	5.66593e+06	5.76834e+06
CAG	1.49522e+07	1.41325e+07	1.35899e+07	1.47204e+07	1.35508e+07	1.4407e+07	1.43028e+07	1.37029e+07	1.43779e+07	1.41004e+07	1.38204e+07	1.38769e+07	1.49772e+07	1.39224e+07	1.4056e+07	1.43869e+07	1.39116e+07	1.41964e+07	1.43208e+07	1.40154e+07	1.40373e+07	1.41731e+07	1.41063e+07	1.40232e+07	1.4311e+07	1.40714e+07	1.42723e+07	9.85831e+06	1.48e+07	1.43026e+07	1.45122e+07	1.3449e+07	1.32507e+07	1.42451e+07	1.40376e+07	1.41324e+07	1.57148e+07	1.41861e+07	1.48731e+07	1.37715e+07	1.38782e+07	1.38765e+07	1.4055e+07	1.26631e+07	1.38136e+07	1.45417e+07	1.42251e+07	1.43869e+07	1.46179e+07
CAT	3.69818e+06	3.99277e+06	3.69357e+06	3.67662e+06	3.91142e+06	3.9132e+06	3.85291e+06	4.1158e+06	3.86954e+06	4.03973e+06	3.97992e+06	3.89868e+06	3.81688e+06	3.82348e+06	3.62062e+06	3.84537e+06	3.89641e+06	3.67232e+06	3.90041e+06	3.60597e+06	3.78723e+06	3.76407e+06	3.97662e+06	3.93864e+06	3.77166e+06	3.90398e+06	3.97009e+06	2.98096e+06	3.87944e+06	3.86193e+06	3.9481e+06	3.86954e+06	4.14324e+06	3.95128e+06	3.82792e+06	3.82975e+06	3.79272e+06	4.05612e+06	3.9272e+06	3.83465e+06	3.91792e+06	3.9413e+06	3.92213e+06	4.32478e+06	4.13251e+06	3.86622e+06	4.06791e+06	3.71492e+06	3.9089e+06
CCA	6.58232e+06	6.89272e+06	7.39868e+06	6.63894e+06	6.49021e+06	6.52259e+06	6.12686e+06	6.42647e+06	6.62193e+06	6.69203e+06	6.71166e+06	6.21092e+06	6.56343e+06	6.92161e+06	7.04318e+06	6.90449e+06	6.76938e+06	6.50738e+06	6.8046e+06	7.00147e+06	6.68714e+06	6.56812e+06	6.84107e+06	6.77468e+06	6.46559e+06	6.85601e+06	6.87859e+06	9.41142e+06	6.54487e+06	6.51558e+06	6.8327e+06	6.08458e+06	6.44292e+06	6.88375e+06	6.46329e+06	6.40607e+06	6.37359e+06	6.68487e+06	6.75688e+06	6.93241e+06	6.71153e+06	6.70484e+06	6.6557e+06	6.29267e+06	6.70025e+06	6.30105e+06	6.84144e+06	6.68712e+06	6.58485e+06
CCC	7.5386e+06	7.03901e+06	8.67734e+06	6.8552e+06	6.9595e+06	6.72067e+06	6.88365e+06	7.04076e+06	7.12634e+06	6.64083e+06	7.05068e+06	6.79658e+06	7.31635e+06	7.32107e+06	7.95835e+06	7.40104e+06	6.57555e+06	7.00399e+06	7.30677e+06	7.99995e+06	6.90265e+06	7.07824e+06	6.7319e+06	6.65793e+06	6.77232e+06	7.02094e+06	6.96341e+06	5.96744e+06	6.93423e+06	6.94776e+06	7.14689e+06	6.70688e+06	6.64141e+06	6.82715e+06	6.76237e+06	7.16123e+06	6.98667e+06	6.97412e+06	7.09771e+06	7.21072e+06	6.59659e+06	6.55289e+06	6.56967e+06	6.15626e+06	6.71058e+06	6.42979e+06	6.64795e+06	7.48333e+06	7.15902e+06
CCG	2.25906e+06	2.54253e+06	2.62307e+06	2.45274e+06	2.66106e+06	2.42266e+06	2.47949e+06	2.53979e+06	2.76647e+06	2.43109e+06	2.61338e+06	2.39419e+06	2.63774e+06	2.63725e+06	2.42417e+06	2.80614e+06	2.36245e+06	2.44649e+06	2.74463e+06	2.43224e+06	2.5141e+06	2.51712e+06	2.50864e+06	2.38435e+06	2.41305e+06	2.50596e+06	2.51065e+06	2.05579e+06	2.4758e+06	2.61419e+06	2.7236e+06	2.17012e+06	2.41305e+06	2.46143e+06	2.36247e+06	2.43821e+06	2.57771e+06	2.3937e+06	2.61231e+06	2.51107e+06	2.45458e+06	2.38165e+06	2.34391e+06	1.90819e+06	2.41401e+06	2.20789e+06	2.35861e+06	2.47932e+06	2.76924e+06
CCT	8.50537e+06	7.53445e+06	1.09149e+07	7.30991e+06	7.47397e+06	7.42107e+06	6.74929e+06	7.03734e+06	7.45429e+06	7.22357e+06	7.35444e+06	6.86373e+06	7.45124e+06	7.66678e+06	9.10631e+06	7.57899e+06	7.48897e+06	7.36488e+06	7.5433e+06	9.31925e+06	7.3965e+06	7.47351e+06	7.55279e+06	7.40166e+06	7.33575e+06	7.72551e+06	7.48263e+06	9.11131e+06	7.39479e+06	7.52495e+06	7.47351e+06	6.90934e+06	7.18403e+06	7.69287e+06	7.1405e+06	7.20142e+06	7.01017e+06	7.31782e+06	7.41551e+06	7.68085e+06	7.49079e+06	7.32622e+06	7.35327e+06	6.78298e+06	7.16467e+06	7.07951e+06	7.60178e+06	8.52389e+06	7.28807e+06
CGA	2.8053e+06	2.75893e+06	2.93755e+06	2.79087e+06	2.75336e+06	2.88689e+06	2.67073e+06	2.86134e+06	2.70773e+06	2.84957e+06	2.76617e+06	2.63697e+06	2.80404e+06	2.94523e+06	2.80558e+06	2.69301e+06	2.99387e+06	2.89986e+06	2.77132e+06	2.77852e+06	2.81425e+06	2.82635e+06	2.87178e+06	2.9593e+06	2.88681e+06	2.80125e+06	2.79145e+06	2.57055e+06	2.82636e+06	2.70597e+06	2.77637e+06	2.84848e+06	2.78775e+06	2.83812e+06	3.00153e+06	2.82903e+06	2.93808e+06	2.67345e+06	2.82538e+06	2.92342e+06	2.90028e+06	2.98308e+06	2.88512e+06	2.29681e+06	2.61678e+06	2.75154e+06	2.86742e+06	2.74458e+06	2.7233e+06
CGC	4.51906e+06	3.867e+06	4.15779e+06	4.47526e+06	3.3626e+06	4.30703e+06	4.77706e+06	4.01532e+06	4.00041e+06	3.75882e+06	3.96337e+06	4.1939e+06	4.22394e+06	4.39114e+06	4.09466e+06	4.16343e+06	4.05502e+06	4.37111e+06	4.11923e+06	4.10921e+06	3.95144e+06	4.17314e+06	4.04916e+06	3.93258e+06	4.47025e+06	3.96532e+06	4.25488e+06	2.8829e+06	4.02766e+06	4.32538e+06	4.09087e+06	3.49083e+06	3.77028e+06	3.89529e+06	4.11149e+06	4.10112e+06	4.61575e+06	3.92576e+06	4.04851e+06	4.30708e+06	4.09026e+06	3.97656e+06	3.82045e+06	3.61171e+06	3.79098e+06	4.45913e+06	3.87132e+06	4.10791e+06	4.23119e+06
CGG	4.60144e+06	4.22518e+06	4.03603e+06	4.13593e+06	3.90236e+06	4.15765e+06	4.16222e+06	4.18933e+06	4.38921e+06	4.15614e+06	4.22554e+06	4.0759e+06	4.45205e+06	4.23721e+06	4.2531e+06	4.319e+06	4.34189e+06	4.2531e+06	4.36657e+06	4.259e+06	4.39427e+06	4.26539e+06	4.42347e+06	4.33429e+06	4.22274e+06	4.2531e+06	4.21214e+06	2.95378e+06	4.30401e+06	4.27718e+06	4.35248e+06	4.03371e+06	4.20733e+06	4.3467e+06	4.36232e+06	4.21936e+06	4.83997e+06	4.2531e+06	4.43631e+06	4.15394e+06	4.33291e+06	4.26308e+06	4.31398e+06	3.38057e+06	4.01592e+06	3.96587e+06	4.27055e+06	4.33641e+06	4.54436e+06
CGT	2.35678e+06	2.00775e+06	2.48305e+06	2.30897e+06	1.85025e+06	2.13809e+06	2.14628e+06	1.94212e+06	2.10211e+06	2.04416e+06	1.99001e+06	2.019e+06	2.4061e+06	2.31625e+06	2.30318e+06	2.03453e+06	2.31349e+06	2.31821e+06	2.03878e+06	2.27694e+06	2.25291e+06	2.20401e+06	2.2358e+06	2.27659e+06	2.2117e+06	2.15422e+06	2.08707e+06	2.14137e+06	2.39282e+06	2.13599e+06	2.02292e+06	1.97324e+06	2.01008e+06	2.22847e+06	2.26588e+06	2.19836e+06	2.25692e+06	2.07039e+06	2.07229e+06	2.278e+06	2.23069e+06	2.2676e+06	2.25507e+06	1.87034e+06	1.90824e+06	2.20385e+06	2.24101e+06	2.16485e+06	2.04267e+06
CTA	2.58876e+06	2.81264e+06	2.54883e+06	2.62438e+06	2.93536e+06	2.92256e+06	2.93258e+06	2.74934e+06	2.79165e+06	2.85375e+06	2.85649e+06	2.92332e+06	2.71416e+06	2.60546e+06	2.53334e+06	2.72304e+06	2.59532e+06	2.62674e+06	2.75391e+06	2.49592e+06	2.78559e+06	2.64127e+06	2.71866e+06	2.73169e+06	2.80005e+06	2.7879e+06	2.80726e+06	2.75585e+06	2.73005e+06	2.67063e+06	2.82776e+06	2.81213e+06	2.92745e+06	2.74184e+06	2.7212e+06	2.72782e+06	2.87929e+06	2.83646e+06	2.83652e+06	2.60435e+06	2.60909e+06	2.65676e+06	2.81029e+06	2.89139e+06	2.93347e+06	2.87322e+06	2.77453e+06	2.65732e+06	2.80573e+06
CTC	7.42672e+06	7.24592e+06	7.03786e+06	7.22938e+06	7.53079e+06	7.35324e+06	7.72751e+06	7.45772e+06	7.38698e+06	6.86594e+06	7.36447e+06	7.65318e+06	7.17153e+06	6.79741e+06	7.25301e+06	7.21865e+06	6.86617e+06	7.56541e+06	7.2243e+06	7.19858e+06	7.08618e+06	7.38e+06	7.17118e+06	6.87202e+06	7.37886e+06	7.11537e+06	7.04588e+06	5.53866e+06	7.04591e+06	7.5104e+06	7.32052e+06	6.90308e+06	7.90827e+06	7.02142e+06	6.96521e+06	7.36633e+06	7.3132e+06	7.34164e+06	7.0947e+06	6.76248e+06	6.90776e+06	6.60649e+06	6.91034e+06	7.31241e+06	7.34327e+06	7.31678e+06	6.955e+06	7.28986e+06	7.63428e+06
CTG	1.64716e+07	1.54227e+07	1.53553e+07	1.65023e+07	1.59543e+07	1.63787e+07	1.65684e+07	1.61604e+07	1.59016e+07	1.44953e+07	1.53329e+07	1.59178e+07	1.61421e+07	1.49493e+07	1.5701e+07	1.56876e+07	1.53972e+07	1.69584e+07	1.57867e+07	1.58392e+07	1.57141e+07	1.64701e+07	1.55943e+07	1.51529e+07	1.66622e+07	1.53748e+07	1.55409e+07	1.13038e+07	1.56688e+07	1.69839e+07	1.58062e+07	1.54479e+07	1.58893e+07	1.53775e+07	1.5403e+07	1.59986e+07	1.62792e+07	1.62981e+07	1.5173e+07	1.47242e+07	1.52927e+07	1.47494e+07	1.55782e+07	1.63484e+07	1.52301e+07	1.63564e+07	1.54197e+07	1.58656e+07	1.6508e+07
CTT	4.54721e+06	4.86934e+06	4.84278e+06	4.76298e+06	4.87281e+06	4.84298e+06	4.68414e+06	4.8618e+06	4.93356e+06	5.00868e+06	4.87758e+06	4.79407e+06	4.53051e+06	4.83828e+06	4.66883e+06	4.70898e+06	4.9337e+06	4.67554e+06	4.75782e+06	4.5871e+06	4.86072e+06	4.73015e+06	4.99855e+06	4.93561e+06	4.70196e+06	4.87821e+06	4.79208e+06	4.88034e+06	4.59737e+06	4.87761e+06	4.86958e+06	4.76344e+06	5.2263e+06	4.93421e+06	4.87412e+06	4.75009e+06	4.71826e+06	4.91725e+06	4.87839e+06	4.90054e+06	4.97435e+06	4.95232e+06	4.91548e+06	5.22243e+06	4.80711e+06	4.66226e+06	5.00595e+06	4.64144e+06	4.7997e+06
GAA	1.13415e+07	1.19269e+07	1.18574e+07	1.11647e+07	1.04769e+07	1.11323e+07	1.13374e+07	1.11539e+07	1.16254e+07	1.29183e+07	1.17367e+07	1.17362e+07	1.20932e+07	1.21755e+07	1.1435e+07	1.18048e+07	1.2016e+07	1.0953e+07	1.16147e+07	1.11303e+07	1.17266e+07	1.09336e+07	1.17367e+07	1.19647e+07	1.09517e+07	1.18508e+07	1.19623e+07	1.79257e+07	1.23632e+07	1.07253e+07	1.17578e+07	1.11868e+07	1.10492e+07	1.19711e+07	1.15167e+07	1.09401e+07	1.19266e+07	1.08417e+07	1.3009e+07	1.23459e+07	1.19099e+07	1.2323e+07	1.18899e+07	1.17243e+07	1.16042e+07	1.1129e+07	1.2042e+07	1.13611e+07	1.11733e+07
GAC	1.19339e+07	1.13789e+07	1.16751e+07	1.16945e+07	1.09753e+07	1.11571e+07	1.13126e+07	1.15519e+07	1.1293e+07	1.12658e+07	1.11287e+07	1.12234e+07	1.20151e+07	1.14673e+07	1.19344e+07	1.16005e+07	1.11165e+07	1.16943e+07	1.14779e+07	1.17402e+07	1.14597e+07	1.15018e+07	1.11043e+07	1.11193e+07	1.13816e+07	1.13342e+07	1.10958e+07	1.00216e+07	1.17956e+07	1.13491e+07	1.13085e+07	1.10484e+07	1.10521e+07	1.12622e+07	1.11186e+07	1.148e+07	1.15113e+07	1.13141e+07	1.13154e+07	1.1499e+07	1.11721e+07	1.12353e+07	1.13282e+07	1.10909e+07	1.1069e+07	1.1318e+07	1.11668e+07	1.15822e+07	1.14296e+07
GAG	1.78135e+07	1.73353e+07	1.71e+07	1.80141e+07	1.60101e+07	1.75659e+07	1.76192e+07	1.76785e+07	1.75561e+07	1.76224e+07	1.70191e+07	1.74251e+07	1.93495e+07	1.77087e+07	1.70317e+07	1.78486e+07	1.75739e+07	1.79051e+07	1.75659e+07	1.6923e+07	1.76173e+07	1.75313e+07	1.74213e+07	1.73273e+07	1.77182e+07	1.74106e+07	1.7417e+07	1.76089e+07	1.90356e+07	1.78665e+07	1.74927e+07	1.6103e+07	1.59611e+07	1.74685e+07	1.72284e+07	1.67731e+07	1.93073e+07	1.71398e+07	1.87333e+07	1.75744e+07	1.76252e+07	1.75328e+07	1.75156e+07	1.60416e+07	1.66038e+07	1.75659e+07	1.7487e+07	1.70608e+07	1.75659e+07
GAT	9.87484e+06	9.42977e+06	9.69156e+06	9.3583e+06	8.60574e+06	9.03907e+06	9.19092e+06	9.15228e+06	9.10482e+06	1.00057e+07	9.48266e+06	9.41827e+06	9.43664e+06	9.81982e+06	9.86296e+06	9.36183e+06	9.39162e+06	9.34985e+06	9.28229e+06	9.61949e+06	9.36562e+06	9.0917e+06	9.17162e+06	9.49414e+06	9.14163e+06	9.4235e+06	9.42166e+06	1.0259e+07	9.6002e+06	8.65331e+06	9.18154e+06	9.79149e+06	9.43244e+06	9.48122e+06	9.5306e+06	9.06898e+06	8.87412e+06	9.10337e+06	9.49348e+06	1.0076e+07	9.32305e+06	9.766e+06	9.56397e+06	9.49262e+06	9.2828e+06	9.31032e+06	9.45617e+06	9.53757e+06	8.93741e+06
GCA	6.14003e+06	6.51851e+06	6.14996e+06	6.33491e+06	6.20036e+06	6.29728e+06	6.52198e+06	6.45277e+06	6.54577e+06	6.78719e+06	6.56035e+06	6.57757e+06	6.37308e+06	6.5156e+06	6.15933e+06	6.33568e+06	6.31633e+06	6.17565e+06	6.45819e+06	6.03794e+06	6.4507e+06	6.17826e+06	6.31938e+06	6.48704e+06	6.23833e+06	6.42552e+06	6.35325e+06	7.08821e+06	6.49686e+06	5.89514e+06	6.46413e+06	6.40495e+06	6.7304e+06	6.44532e+06	6.54125e+06	6.40266e+06	6.60622e+06	6.3955e+06	6.72202e+06	6.54572e+06	6.26139e+06	6.44964e+06	6.48591e+06	6.47714e+06	6.31937e+06	6.25568e+06	6.45986e+06	6.15327e+06	6.40808e+06
GCC	1.22357e+07	1.06193e+07	1.11245e+07	1.14008e+07	1.0672e+07	1.08715e+07	1.15231e+07	1.15944e+07	1.0991e+07	1.04235e+07	1.08949e+07	1.11172e+07	1.19052e+07	1.10493e+07	1.14553e+07	1.08401e+07	1.02561e+07	1.12209e+07	1.09838e+07	1.15732e+07	1.06811e+07	1.10205e+07	1.02602e+07	1.05223e+07	1.11312e+07	1.09975e+07	1.0691e+07	9.7613e+06	1.15678e+07	1.05615e+07	1.07776e+07	1.08132e+07	1.12604e+07	1.04394e+07	1.13118e+07	1.14849e+07	1.16031e+07	1.12438e+07	1.09788e+07	1.08216e+07	1.00944e+07	1.03075e+07	1.05521e+07	1.07972e+07	1.03807e+07	1.11459e+07	1.03083e+07	1.1568e+07	1.11292e+07
GCG	2.8128e+06	2.85648e+06	2.77772e+06	2.95261e+06	2.82903e+06	2.77262e+06	2.97304e+06	2.95386e+06	3.30856e+06	2.81848e+06	2.99452e+06	2.81261e+06	2.96072e+06	3.07803e+06	2.82754e+06	3.13098e+06	2.84461e+06	3.04184e+06	3.09826e+06	2.74069e+06	2.94283e+06	2.94873e+06	2.80328e+06	2.87127e+06	2.89986e+06	2.78397e+06	2.95882e+06	2.08395e+06	2.82117e+06	2.89245e+06	3.14986e+06	2.93821e+06	2.74541e+06	2.87903e+06	2.90499e+06	2.82018e+06	2.98061e+06	2.7611e+06	2.96593e+06	2.97141e+06	2.8375e+06	2.95989e+06	2.86373e+06	2.48617e+06	2.74948e+06	2.85138e+06	2.70256e+06	2.75923e+06	3.33475e+06
GCT	9.21124e+06	8.55206e+06	9.83625e+06	9.10095e+06	7.94009e+06	8.52751e+06	8.63256e+06	9.26293e+06	8.47607e+06	8.64742e+06	8.59695e+06	8.74946e+06	9.06422e+06	9.23811e+06	9.23972e+06	8.48367e+06	9.18826e+06	8.79494e+06	8.53662e+06	9.1768e+06	8.94601e+06	8.68096e+06	8.83269e+06	9.22069e+06	8.65108e+06	8.58407e+06	8.48983e+06	9.31033e+06	9.19243e+06	8.42482e+06	8.42809e+06	8.72182e+06	8.90145e+06	8.85758e+06	9.27791e+06	9.20911e+06	8.47691e+06	8.53618e+06	8.74407e+06	9.27719e+06	8.96398e+06	9.29494e+06	9.05831e+06	9.27287e+06	8.13091e+06	8.75148e+06	9.01449e+06	8.96717e+06	8.54116e+06
GGA	7.70008e+06	6.87888e+06	8.98946e+06	6.7666e+06	6.45392e+06	6.53155e+06	6.52275e+06	6.78435e+06	6.50743e+06	6.62233e+06	6.61773e+06	6.5714e+06	6.35129e+06	6.6564e+06	8.21561e+06	6.81346e+06	6.44068e+06	6.61264e+06	6.70561e+06	8.1758e+06	6.46785e+06	6.48666e+06	6.38929e+06	6.48717e+06	6.5462e+06	7.0422e+06	6.73426e+06	6.95358e+06	6.49866e+06	6.3962e+06	6.71361e+06	6.65817e+06	7.31621e+06	6.61515e+06	6.78883e+06	6.82169e+06	6.16706e+06	6.81187e+06	6.65111e+06	6.82278e+06	6.44948e+06	6.52045e+06	6.48777e+06	7.15229e+06	6.89988e+06	6.72202e+06	6.53125e+06	7.64552e+06	6.51402e+06
GGC	1.11965e+07	9.2761e+06	1.15085e+07	9.70738e+06	9.20478e+06	9.17561e+06	9.27097e+06	1.00173e+07	9.49396e+06	8.5432e+06	9.15975e+06	8.97152e+06	9.83099e+06	9.69811e+06	1.11253e+07	9.65317e+06	9.03838e+06	9.82367e+06	9.54078e+06	1.11278e+07	9.16262e+06	9.54121e+06	9.02372e+06	8.99885e+06	9.47078e+06	9.37462e+06	9.13959e+06	7.77576e+06	9.41137e+06	9.44182e+06	9.28086e+06	9.35882e+06	9.68546e+06	9.0544e+06	9.42452e+06	1.00583e+07	9.09952e+06	9.40721e+06	8.86462e+06	9.60632e+06	9.04914e+06	9.00111e+06	8.94973e+06	8.70045e+06	8.93764e+06	9.38198e+06	8.93031e+06	1.05672e+07	9.47466e+06
GGG	5.89583e+06	6.06759e+06	6.22214e+06	5.83819e+06	6.07673e+06	6.09992e+06	6.22624e+06	6.03173e+06	5.94993e+06	5.75669e+06	5.9661e+06	6.06604e+06	6.11115e+06	5.71376e+06	6.12191e+06	6.14119e+06	5.79259e+06	6.27275e+06	6.1246e+06	6.12529e+06	5.91034e+06	6.10104e+06	5.89861e+06	5.70356e+06	6.1709e+06	6.04395e+06	5.94764e+06	5.09202e+06	5.95339e+06	6.29585e+06	6.10212e+06	6.01294e+06	6.43073e+06	5.78637e+06	5.86827e+06	6.1818e+06	6.11336e+06	6.0938e+06	5.94015e+06	5.68038e+06	5.78251e+06	5.5453e+06	5.82479e+06	5.65625e+06	6.01351e+06	6.18935e+06	5.86684e+06	6.04234e+06	6.21131e+06
GGT	5.87002e+06	4.88121e+06	9.17472e+06	5.18532e+06	4.75384e+06	4.95803e+06	4.69727e+06	4.89585e+06	4.82084e+06	4.81006e+06	4.83419e+06	4.66796e+06	4.96839e+06	5.33886e+06	6.77241e+06	4.99427e+06	5.22847e+06	5.04177e+06	4.92594e+06	6.90494e+06	5.12043e+06	4.96076e+06	5.04034e+06	5.18421e+06	5.01116e+06	5.12478e+06	4.9167e+06	5.09848e+06	4.96827e+06	4.9087e+06	4.8093e+06	5.54288e+06	5.13534e+06	5.0865e+06	5.18421e+06	5.30312e+06	4.55494e+06	4.87853e+06	4.72889e+06	5.50487e+06	5.18421e+06	5.32281e+06	5.0941e+06	4.6558e+06	4.75543e+06	5.0614e+06	5.10602e+06	6.08326e+06	4.68049e+06
GTA	2.84738e+06	2.90141e+06	2.67765e+06	2.72841e+06	2.92918e+06	2.87017e+06	2.78653e+06	2.92054e+06	2.80781e+06	2.94331e+06	2.93634e+06	2.90082e+06	2.75231e+06	2.8749e+06	2.80514e+06	2.7808e+06	2.92631e+06	2.73301e+06	2.80906e+06	2.71824e+06	2.89829e+06	2.75302e+06	2.89167e+06	2.95171e+06	2.77142e+06	2.86184e+06	2.93976e+06	3.98683e+06	2.84085e+06	2.71875e+06	2.82894e+06	3.00426e+06	2.89237e+06	2.92402e+06	2.89038e+06	2.80941e+06	2.743e+06	2.90555e+06	2.86828e+06	2.89623e+06	2.8812e+06	2.95326e+06	2.9464e+06	2.86353e+06	2.85381e+06	2.80417e+06	2.93568e+06	2.84809e+06	2.79933e+06
GTC	6.17279e+06	5.99118e+06	6.10881e+06	6.13346e+06	6.42925e+06	6.28125e+06	6.17601e+06	6.0088e+06	6.00405e+06	5.67837e+06	5.9215e+06	6.12241e+06	5.87968e+06	5.91839e+06	6.23816e+06	6.04274e+06	5.93658e+06	6.27117e+06	6.00416e+06	6.21155e+06	5.91864e+06	6.24181e+06	5.92069e+06	5.8868e+06	6.2396e+06	5.92135e+06	6.03711e+06	8.3058e+06	5.88071e+06	6.40585e+06	5.99266e+06	6.21238e+06	6.49371e+06	5.81672e+06	6.16132e+06	6.52099e+06	5.96338e+06	6.21839e+06	5.74068e+06	5.93075e+06	5.86215e+06	5.81269e+06	5.9009e+06	6.50474e+06	6.10889e+06	6.16076e+06	5.87225e+06	6.07326e+06	6.11877e+06
GTG	1.26727e+07	1.17761e+07	1.14076e+07	1.17283e+07	1.18956e+07	1.23181e+07	1.2459e+07	1.23089e+07	1.19461e+07	1.10025e+07	1.165e+07	1.21094e+07	1.17175e+07	1.12159e+07	1.20456e+07	1.1747e+07	1.17834e+07	1.2541e+07	1.18793e+07	1.20398e+07	1.14595e+07	1.22757e+07	1.1672e+07	1.14246e+07	1.24556e+07	1.15626e+07	1.18402e+07	1.21932e+07	1.16089e+07	1.26818e+07	1.16159e+07	1.19797e+07	1.1992e+07	1.14015e+07	1.19024e+07	1.23928e+07	1.191e+07	1.19298e+07	1.09798e+07	1.12448e+07	1.17106e+07	1.13122e+07	1.15144e+07	1.22e+07	1.14309e+07	1.22769e+07	1.16229e+07	1.1987e+07	1.21677e+07
GTT	4.33761e+06	4.49814e+06	4.41119e+06	4.42405e+06	4.24217e+06	4.31576e+06	4.09432e+06	4.2691e+06	4.43846e+06	4.55985e+06	4.40353e+06	4.25726e+06	4.01131e+06	4.6139e+06	4.33636e+06	4.30909e+06	4.69629e+06	4.20606e+06	4.33687e+06	4.25455e+06	4.49585e+06	4.27371e+06	4.5185e+06	4.75667e+06	4.23596e+06	4.35765e+06	4.5132e+06	7.36754e+06	4.24473e+06	4.19924e+06	4.28569e+06	4.43608e+06	4.94645e+06	4.56574e+06	4.68755e+06	4.48616e+06	4.05664e+06	4.44784e+06	4.28471e+06	4.71297e+06	4.62854e+06	4.88265e+06	4.62192e+06	4.42958e+06	4.43949e+06	4.24105e+06	4.6016e+06	4.23156e+06	4.26295e+06
TAC	7.1949e+06	6.39055e+06	6.52987e+06	6.97516e+06	7.17547e+06	6.91781e+06	6.65987e+06	6.89147e+06	6.38165e+06	6.01618e+06	6.44226e+06	6.53507e+06	6.17133e+06	6.27804e+06	6.92355e+06	6.42639e+06	6.49638e+06	6.88994e+06	6.44762e+06	6.90719e+06	6.50814e+06	6.79585e+06	6.55901e+06	6.3618e+06	6.87391e+06	6.42129e+06	6.58429e+06	6.02137e+06	6.09534e+06	7.18204e+06	6.53295e+06	6.75024e+06	6.87492e+06	6.38804e+06	6.47118e+06	6.78783e+06	6.17155e+06	6.50451e+06	6.19727e+06	6.18772e+06	6.46995e+06	6.2383e+06	6.47346e+06	6.74121e+06	6.57336e+06	6.88229e+06	6.40672e+06	6.83639e+06	6.8723e+06
TAT	4.4994e+06	4.48311e+06	4.22366e+06	4.57965e+06	4.7312e+06	4.68346e+06	4.45018e+06	4.93053e+06	4.31671e+06	4.60795e+06	4.61264e+06	4.54535e+06	4.4935e+06	4.36777e+06	4.35675e+06	4.30481e+06	4.64535e+06	4.76175e+06	4.37781e+06	4.29998e+06	4.79664e+06	4.66288e+06	4.6516e+06	4.6308e+06	4.70536e+06	4.61168e+06	4.59069e+06	4.9417e+06	4.61803e+06	4.59614e+06	4.46761e+06	4.49346e+06	5.04797e+06	4.69834e+06	4.65262e+06	4.76286e+06	4.11771e+06	4.57987e+06	4.42762e+06	4.4802e+06	4.66016e+06	4.68605e+06	4.69513e+06	5.29182e+06	4.76368e+06	4.82425e+06	4.66109e+06	4.40011e+06	4.52554e+06
TCA	3.8919e+06	4.28772e+06	4.01188e+06	4.09286e+06	4.20724e+06	4.09191e+06	4.06473e+06	4.16967e+06	4.30805e+06	4.59158e+06	4.43909e+06	4.14875e+06	4.25553e+06	4.24123e+06	3.93124e+06	4.30566e+06	4.14519e+06	3.92023e+06	4.25617e+06	3.86934e+06	4.2594e+06	4.02641e+06	4.25424e+06	4.22467e+06	3.91021e+06	4.33287e+06	4.25133e+06	4.52841e+06	4.25006e+06	3.87451e+06	4.3489e+06	4.19266e+06	3.98196e+06	4.29615e+06	4.24417e+06	4.07975e+06	4.34675e+06	4.3876e+06	4.6281e+06	4.23815e+06	4.20163e+06	4.26189e+06	4.23344e+06	3.93095e+06	4.39069e+06	3.92129e+06	4.31299e+06	4.06145e+06	4.13212e+06
TCC	7.24346e+06	6.84509e+06	6.88856e+06	6.63245e+06	6.927e+06	6.6724e+06	6.81201e+06	7.04333e+06	7.24775e+06	6.6225e+06	6.93745e+06	6.63571e+06	7.26364e+06	6.87279e+06	7.07332e+06	7.17488e+06	6.60208e+06	6.8083e+06	7.128e+06	7.12032e+06	6.90741e+06	6.96046e+06	6.7434e+06	6.66963e+06	6.68646e+06	6.742e+06	6.67503e+06	5.55899e+06	6.89917e+06	6.80488e+06	7.00909e+06	7.07874e+06	6.64838e+06	6.781e+06	6.91e+06	7.03052e+06	7.20612e+06	7.00874e+06	7.28489e+06	6.78687e+06	6.56494e+06	6.58716e+06	6.6707e+06	6.24968e+06	6.90606e+06	6.58537e+06	6.62685e+06	7.06371e+06	6.9656e+06
TCG	1.67864e+06	1.71644e+06	1.7173e+06	1.70381e+06	1.81831e+06	1.5993e+06	1.71402e+06	1.83612e+06	1.81987e+06	1.80174e+06	1.8227e+06	1.74766e+06	1.7873e+06	1.85673e+06	1.70221e+06	1.85847e+06	1.55807e+06	1.64563e+06	1.80266e+06	1.66475e+06	1.70587e+06	1.63819e+06	1.60073e+06	1.64961e+06	1.5613e+06	1.69511e+06	1.70871e+06	1.32501e+06	1.71561e+06	1.60656e+06	1.80909e+06	1.72662e+06	1.58652e+06	1.64163e+06	1.67187e+06	1.66022e+06	1.77303e+06	1.65403e+06	1.83533e+06	1.81944e+06	1.60141e+06	1.68173e+06	1.58732e+06	1.35432e+06	1.63116e+06	1.47456e+06	1.53489e+06	1.67725e+06	1.84348e+06
TCT	6.5e+06	6.4008e+06	6.56875e+06	6.16998e+06	6.21001e+06	6.291e+06	6.13656e+06	6.14489e+06	6.37455e+06	6.57048e+06	6.40392e+06	6.20858e+06	6.35295e+06	6.47775e+06	6.42832e+06	6.45369e+06	6.44152e+06	6.26584e+06	6.40706e+06	6.40667e+06	6.44589e+06	6.27331e+06	6.46808e+06	6.42489e+06	6.17525e+06	6.27193e+06	6.33955e+06	6.47105e+06	6.32797e+06	6.35092e+06	6.44069e+06	6.17127e+06	6.07505e+06	6.49817e+06	6.42064e+06	6.37281e+06	6.51227e+06	6.4836e+06	6.56972e+06	6.53864e+06	6.49102e+06	6.50425e+06	6.41529e+06	5.72721e+06	6.4372e+06	6.17674e+06	6.48866e+06	6.38994e+06	6.30867e+06
TGC	4.91299e+06	4.61867e+06	4.98935e+06	4.05566e+06	4.6325e+06	4.47135e+06	4.50164e+06	4.44656e+06	4.62987e+06	3.82319e+06	4.33521e+06	4.37619e+06	4.46413e+06	4.09112e+06	5.01314e+06	4.70985e+06	3.89001e+06	4.51798e+06	4.62129e+06	5.01727e+06	4.15417e+06	4.48188e+06	4.12752e+06	3.9169e+06	4.49127e+06	4.71655e+06	4.83673e+06	3.33979e+06	4.25005e+06	4.55161e+06	4.78323e+06	5.30405e+06	4.32259e+06	4.0463e+06	3.79131e+06	4.91164e+06	3.5756e+06	3.87004e+06	3.77162e+06	4.0113e+06	3.86464e+06	3.73813e+06	3.98223e+06	4.98629e+06	4.95888e+06	4.53943e+06	3.98189e+06	4.97037e+06	4.97863e+06
TGG	5.21966e+06	4.56895e+06	4.3046e+06	4.46217e+06	5.08329e+06	5.28423e+06	4.93458e+06	4.81881e+06	4.54099e+06	4.28401e+06	4.68057e+06	4.7048e+06	4.26413e+06	4.06252e+06	4.78543e+06	4.41178e+06	4.59934e+06	5.17254e+06	4.51261e+06	4.74876e+06	4.64094e+06	4.99493e+06	4.64467e+06	4.45258e+06	5.26825e+06	4.5576e+06	4.74271e+06	4.88329e+06	4.20916e+06	5.23734e+06	4.59472e+06	4.88649e+06	5.11921e+06	4.47465e+06	4.46061e+06	4.7679e+06	4.20839e+06	4.66246e+06	4.37984e+06	4.04715e+06	4.51865e+06	4.29334e+06	4.61541e+06	4.97077e+06	5.17027e+06	5.50103e+06	4.61541e+06	4.88925e+06	4.90107e+06
TGT	3.82687e+06	3.855e+06	3.83061e+06	3.57048e+06	4.172e+06	4.05862e+06	3.62902e+06	4.36028e+06	3.66701e+06	3.56839e+06	3.75954e+06	3.63019e+06	3.70805e+06	3.54083e+06	3.94339e+06	3.83959e+06	3.56525e+06	4.05534e+06	3.78379e+06	3.9014e+06	3.80532e+06	3.96859e+06	3.6352e+06	3.66592e+06	4.04065e+06	4.01421e+06	4.2097e+06	3.01532e+06	3.66554e+06	3.77045e+06	3.87006e+06	4.4926e+06	3.77145e+06	3.67153e+06	3.59792e+06	4.31628e+06	3.20145e+06	3.64761e+06	3.38673e+06	3.50001e+06	3.46547e+06	3.57409e+06	3.67287e+06	4.35218e+06	4.28132e+06	4.18444e+06	3.62794e+06	3.96858e+06	3.94372e+06
TTA	1.83435e+06	2.32532e+06	1.97851e+06	2.11255e+06	2.31691e+06	2.2739e+06	2.2994e+06	2.32886e+06	2.31838e+06	2.70452e+06	2.45226e+06	2.36952e+06	2.12066e+06	2.31009e+06	1.89298e+06	2.25456e+06	2.333e+06	2.00734e+06	2.21747e+06	1.80148e+06	2.2694e+06	2.10286e+06	2.36264e+06	2.41329e+06	2.10488e+06	2.33428e+06	2.29589e+06	2.37732e+06	2.24405e+06	2.05353e+06	2.32306e+06	2.31342e+06	2.34714e+06	2.41909e+06	2.27264e+06	2.1933e+06	2.23705e+06	2.18576e+06	2.44498e+06	2.307e+06	2.36884e+06	2.49021e+06	2.39193e+06	2.25344e+06	2.37411e+06	2.15647e+06	2.42092e+06	2.06045e+06	2.19966e+06
TTC	8.68004e+06	7.91058e+06	8.23924e+06	8.16834e+06	8.84418e+06	8.36735e+06	8.46804e+06	9.17255e+06	8.03855e+06	7.52347e+06	8.05566e+06	8.26867e+06	7.98819e+06	7.63403e+06	8.46811e+06	7.91186e+06	7.95378e+06	8.34963e+06	7.95011e+06	8.48051e+06	7.99991e+06	8.30705e+06	8.12149e+06	7.79551e+06	8.31702e+06	8.06319e+06	7.86942e+06	6.61597e+06	7.84627e+06	8.64578e+06	7.96527e+06	8.00907e+06	8.55389e+06	7.84399e+06	7.92932e+06	8.26439e+06	7.35538e+06	8.12506e+06	7.40673e+06	7.68574e+06	7.97355e+06	7.66466e+06	7.88857e+06	9.1672e+06	7.98699e+06	8.16517e+06	7.81454e+06	8.35375e+06	8.28852e+06
TTG	4.55485e+06	4.96997e+06	4.58285e+06	5.04008e+06	5.01603e+06	5.02996e+06	5.02435e+06	4.87953e+06	5.07413e+06	5.04358e+06	4.96888e+06	4.96689e+06	4.77508e+06	4.88202e+06	4.61557e+06	4.92986e+06	4.95906e+06	4.87816e+06	4.96426e+06	4.51796e+06	4.89543e+06	4.89455e+06	5.06033e+06	4.94401e+06	4.91248e+06	4.97085e+06	4.97696e+06	3.52265e+06	4.84775e+06	5.08337e+06	5.04849e+06	5.5575e+06	5.19225e+06	4.98288e+06	5.07808e+06	4.93654e+06	4.92926e+06	4.94672e+06	4.99213e+06	4.92986e+06	5.04596e+06	4.92986e+06	4.93507e+06	5.21244e+06	5.12551e+06	4.97562e+06	5.03929e+06	4.65195e+06	5.01416e+06
TTT	6.09195e+06	6.13059e+06	5.89085e+06	6.40999e+06	6.61764e+06	6.18748e+06	6.11405e+06	6.53766e+06	6.00947e+06	6.32733e+06	6.28224e+06	6.29575e+06	5.68899e+06	6.04142e+06	5.95756e+06	5.88051e+06	5.8848e+06	5.85906e+06	6.024e+06	5.96256e+06	6.13196e+06	5.975e+06	6.02411e+06	6.14645e+06	6.00857e+06	6.16582e+06	6.04913e+06	5.34995e+06	5.85988e+06	5.89756e+06	6.07662e+06	6.61652e+06	7.35297e+06	6.17214e+06	6.19591e+06	6.09978e+06	5.47407e+06	6.1441e+06	6.09253e+06	6.15418e+06	5.99984e+06	6.18493e+06	6.1701e+06	7.46527e+06	6.33339e+06	6.18352e+06	6.10318e+06	6.0972e+06	6.08731e+06
[truncated: 61 more columns]
