# Supplementary material for: Cell type–specific analysis by single-cell profiling identifies a stable mammalian tRNA–mRNA interface and increased translation efficiency in neurons
Source: HighWire-hosted journal article supplement (doi:10.1101/gr.275944.121), 2021-12-02
Supplement: Supplemental_Table_S4.xlsx [file Supplemental_Table_S4.xlsx]

## Sheet: AA_demand
# Table S4. Adult mouse AA demand usage by cell type matrix
	Heart fibroblast	Heart endothelial cell	Bladder bladder cell	Bladder bladder urothelial cell	Brain microglial cell	Brain macrophage	Brain astrocyte	Brain oligodendrocyte	Brain endothelial cell	Brain neuron	Brain oligodendrocyte precursor cell	Brain Bergmann glial cell	Brain brain pericyte	Muscle skeletal muscle satellite stem cell	Muscle mesenchymal stem cell	Muscle endothelial cell	Muscle lymphocyte	Muscle macrophage	Fat endothelial cell	Fat mesenchymal stem cell of adipose	Fat natural killer cell	Fat myeloid cell	Fat B cell	Fat T cell	Heart leukocyte	Heart myofibroblast cell	Heart endocardial cell	Heart cardiac muscle cell	Heart smooth muscle cell	Kidney macrophage	Kidney endothelial cell	Kidney kidney collecting duct epithelial cell	Kidney epithelial cell of proximal tubule	Kidney leukocyte	Intestine epithelial cell of large intestine	Intestine large intestine goblet cell	Intestine Brush cell of epithelium proper of large intestine	Intestine enterocyte of epithelium of large intestine	Intestine enteroendocrine cell	Muscle skeletal muscle satellite cell	Muscle B cell	Muscle T cell	Liver natural killer cell	Liver hepatocyte	Liver endothelial cell of hepatic sinusoid	Liver Kupffer cell	Liver B cell	Lung stromal cell	Lung lung endothelial cell
A	2.9324e+07	2.8659e+07	3.02159e+07	2.97063e+07	2.75671e+07	2.79565e+07	2.93532e+07	3.00873e+07	2.9411e+07	2.9054e+07	2.9138e+07	2.92537e+07	3.00966e+07	3.01779e+07	2.94967e+07	2.89441e+07	2.88122e+07	2.8926e+07	2.91716e+07	2.96639e+07	2.90214e+07	2.86816e+07	2.82562e+07	2.93811e+07	2.87406e+07	2.89137e+07	2.8657e+07	2.9792e+07	3.01047e+07	2.739e+07	2.89485e+07	2.8652e+07	2.91356e+07	2.87403e+07	3.01265e+07	2.97602e+07	3.0252e+07	2.90304e+07	2.98456e+07	2.97578e+07	2.83767e+07	2.93208e+07	2.90678e+07	2.8603e+07	2.76884e+07	2.87306e+07	2.85365e+07	2.94457e+07	2.91168e+07
C	8.43057e+06	8.50712e+06	8.91659e+06	7.6049e+06	8.78082e+06	8.37643e+06	8.04911e+06	8.75544e+06	8.3222e+06	7.48884e+06	8.12018e+06	8.00553e+06	8.11647e+06	7.70777e+06	8.90067e+06	8.59507e+06	7.50918e+06	8.48317e+06	8.43247e+06	8.95954e+06	7.95971e+06	8.40743e+06	7.77389e+06	7.65574e+06	8.47888e+06	8.76795e+06	9.09855e+06	6.70347e+06	7.92252e+06	8.20703e+06	8.69198e+06	9.71993e+06	7.95694e+06	7.7499e+06	7.41151e+06	9.1796e+06	6.91072e+06	7.54205e+06	7.26417e+06	7.5473e+06	7.38725e+06	7.39005e+06	7.68356e+06	9.20005e+06	9.27638e+06	8.64151e+06	7.62353e+06	8.93833e+06	8.83246e+06
D	2.1037e+07	2.08908e+07	2.16008e+07	2.09942e+07	1.95284e+07	1.98327e+07	2.02978e+07	2.05834e+07	2.046e+07	2.15514e+07	2.06761e+07	2.06395e+07	2.13056e+07	2.14986e+07	2.16614e+07	2.10742e+07	2.06564e+07	2.08228e+07	2.08278e+07	2.14575e+07	2.08259e+07	2.04886e+07	2.03051e+07	2.08117e+07	2.03956e+07	2.08461e+07	2.06357e+07	2.13923e+07	2.14145e+07	1.9726e+07	2.05817e+07	2.06767e+07	2.01375e+07	2.08297e+07	2.07114e+07	2.04414e+07	2.07875e+07	2.04837e+07	2.11165e+07	2.16783e+07	2.06549e+07	2.12249e+07	2.09699e+07	2.02784e+07	2.04315e+07	2.04336e+07	2.06601e+07	2.11183e+07	2.01619e+07
E	2.81232e+07	2.93778e+07	2.92746e+07	2.90975e+07	2.64158e+07	2.81816e+07	2.86662e+07	2.86641e+07	2.92707e+07	3.09427e+07	2.88462e+07	2.91582e+07	3.12283e+07	3.01811e+07	2.82892e+07	2.98116e+07	2.98039e+07	2.85546e+07	2.92757e+07	2.81818e+07	2.93447e+07	2.832e+07	2.92001e+07	2.95736e+07	2.84916e+07	2.9386e+07	2.95485e+07	3.74824e+07	3.14264e+07	2.81966e+07	2.93812e+07	2.70761e+07	2.65528e+07	2.95619e+07	2.88317e+07	2.75681e+07	3.18501e+07	2.80723e+07	3.22115e+07	3.00636e+07	2.97653e+07	3.01736e+07	2.95148e+07	2.73543e+07	2.83185e+07	2.8424e+07	2.95821e+07	2.84199e+07	2.84497e+07
F	1.42492e+07	1.40966e+07	1.42849e+07	1.45377e+07	1.54202e+07	1.42929e+07	1.44358e+07	1.56185e+07	1.40909e+07	1.40331e+07	1.4383e+07	1.45629e+07	1.35839e+07	1.38113e+07	1.43357e+07	1.3866e+07	1.39387e+07	1.40593e+07	1.40196e+07	1.45092e+07	1.41323e+07	1.42093e+07	1.4166e+07	1.4076e+07	1.42365e+07	1.42896e+07	1.39988e+07	1.26218e+07	1.37182e+07	1.43423e+07	1.41047e+07	1.45111e+07	1.56374e+07	1.40744e+07	1.41678e+07	1.4289e+07	1.30825e+07	1.43155e+07	1.36988e+07	1.39062e+07	1.40823e+07	1.3997e+07	1.41109e+07	1.63859e+07	1.43764e+07	1.42132e+07	1.39428e+07	1.44499e+07	1.4231e+07
G	2.95773e+07	2.72108e+07	3.62881e+07	2.74209e+07	2.6418e+07	2.62833e+07	2.64492e+07	2.75674e+07	2.68539e+07	2.60709e+07	2.66613e+07	2.62741e+07	2.7076e+07	2.76794e+07	3.20342e+07	2.77494e+07	2.66918e+07	2.7459e+07	2.73859e+07	3.2482e+07	2.6662e+07	2.69517e+07	2.63899e+07	2.66274e+07	2.70299e+07	2.77031e+07	2.68922e+07	2.62858e+07	2.68552e+07	2.66688e+07	2.70262e+07	2.73569e+07	2.80838e+07	2.66527e+07	2.7348e+07	2.82164e+07	2.64464e+07	2.72796e+07	2.65719e+07	2.77467e+07	2.66717e+07	2.66706e+07	2.64544e+07	2.5777e+07	2.67106e+07	2.70965e+07	2.6482e+07	3.03362e+07	2.66097e+07
H	9.04099e+06	9.638e+06	9.31404e+06	9.32918e+06	9.48942e+06	9.39447e+06	9.42784e+06	1.00053e+07	9.56164e+06	9.62824e+06	9.6889e+06	9.4596e+06	9.54818e+06	9.26822e+06	9.0601e+06	9.58106e+06	9.47887e+06	9.2092e+06	9.60434e+06	9.21275e+06	9.3319e+06	9.3833e+06	9.54056e+06	9.47804e+06	9.35322e+06	9.55315e+06	9.5647e+06	7.37046e+06	9.52496e+06	9.48014e+06	9.66535e+06	9.00754e+06	9.54009e+06	9.51358e+06	9.32708e+06	9.41321e+06	9.43739e+06	9.73145e+06	9.78199e+06	9.15411e+06	9.46761e+06	9.42578e+06	9.37641e+06	9.76401e+06	9.82321e+06	9.33684e+06	9.59767e+06	9.3802e+06	9.57975e+06
I	1.6529e+07	1.78826e+07	1.74421e+07	1.84141e+07	1.768e+07	1.74135e+07	1.83082e+07	1.76429e+07	1.78309e+07	1.81014e+07	1.78315e+07	1.87319e+07	1.75474e+07	1.81793e+07	1.71315e+07	1.76941e+07	1.81915e+07	1.78156e+07	1.75708e+07	1.70748e+07	1.79114e+07	1.77247e+07	1.77272e+07	1.82726e+07	1.76066e+07	1.80913e+07	1.77311e+07	2.22376e+07	1.80691e+07	1.71722e+07	1.7623e+07	1.85791e+07	1.90435e+07	1.78098e+07	1.83768e+07	1.77681e+07	1.72866e+07	1.80699e+07	1.69195e+07	1.83609e+07	1.80823e+07	1.8548e+07	1.80454e+07	1.76707e+07	1.78306e+07	1.76168e+07	1.78384e+07	1.69643e+07	1.74833e+07
K	2.32578e+07	2.45303e+07	2.41876e+07	2.58713e+07	2.27673e+07	2.33962e+07	2.28352e+07	2.40861e+07	2.36571e+07	2.53538e+07	2.3021e+07	2.36205e+07	2.47355e+07	2.66048e+07	2.4007e+07	2.44376e+07	2.68166e+07	2.44342e+07	2.43311e+07	2.37649e+07	2.53675e+07	2.40718e+07	2.51049e+07	2.63373e+07	2.36912e+07	2.41983e+07	2.43087e+07	3.27709e+07	2.55889e+07	2.30852e+07	2.39522e+07	2.23895e+07	2.3485e+07	2.52589e+07	2.57806e+07	2.38488e+07	2.51738e+07	2.39405e+07	2.49511e+07	2.63299e+07	2.59157e+07	2.72623e+07	2.55189e+07	2.50186e+07	2.36642e+07	2.38651e+07	2.55171e+07	2.33132e+07	2.32151e+07
L	3.60991e+07	3.77945e+07	3.67443e+07	3.81651e+07	3.85223e+07	3.81029e+07	3.88428e+07	3.82134e+07	3.85235e+07	3.74582e+07	3.79715e+07	3.86206e+07	3.71987e+07	3.6744e+07	3.6436e+07	3.77229e+07	3.73526e+07	3.83045e+07	3.78273e+07	3.66072e+07	3.76125e+07	3.80242e+07	3.79603e+07	3.74057e+07	3.83207e+07	3.7621e+07	3.76748e+07	3.20438e+07	3.71665e+07	3.86379e+07	3.83664e+07	3.75015e+07	3.88218e+07	3.76327e+07	3.74267e+07	3.77739e+07	3.91128e+07	3.86509e+07	3.79729e+07	3.64021e+07	3.74887e+07	3.67723e+07	3.76809e+07	3.86589e+07	3.79616e+07	3.79788e+07	3.76831e+07	3.7164e+07	3.8569e+07
M	8.54294e+06	9.24717e+06	8.76385e+06	9.94274e+06	8.96765e+06	9.32907e+06	9.55217e+06	9.23532e+06	9.15696e+06	9.45739e+06	9.06898e+06	9.47015e+06	9.36544e+06	9.42729e+06	8.66021e+06	9.15976e+06	9.72894e+06	9.61284e+06	9.31614e+06	8.70291e+06	9.59083e+06	9.53401e+06	9.49703e+06	9.55088e+06	9.505e+06	9.17192e+06	9.20295e+06	7.36136e+06	9.53006e+06	9.49393e+06	9.20347e+06	9.57274e+06	9.60132e+06	9.50559e+06	9.3937e+06	9.06927e+06	9.10873e+06	9.31896e+06	9.13607e+06	9.36638e+06	9.58593e+06	9.59397e+06	9.5685e+06	9.1962e+06	8.91829e+06	9.52782e+06	9.60463e+06	8.69475e+06	9.20597e+06
N	1.46459e+07	1.45584e+07	1.51464e+07	1.44246e+07	1.46448e+07	1.46993e+07	1.47697e+07	1.42096e+07	1.44051e+07	1.47128e+07	1.44462e+07	1.46626e+07	1.41946e+07	1.43504e+07	1.50418e+07	1.45592e+07	1.45253e+07	1.5156e+07	1.44165e+07	1.497e+07	1.41472e+07	1.48333e+07	1.4427e+07	1.42987e+07	1.49457e+07	1.46736e+07	1.46833e+07	1.40606e+07	1.4448e+07	1.49011e+07	1.45992e+07	1.47849e+07	1.45783e+07	1.44903e+07	1.45094e+07	1.44356e+07	1.40664e+07	1.49884e+07	1.43783e+07	1.44653e+07	1.46021e+07	1.45224e+07	1.41989e+07	1.49269e+07	1.52616e+07	1.51466e+07	1.44967e+07	1.45287e+07	1.42766e+07
P	2.40047e+07	2.41035e+07	2.99384e+07	2.3192e+07	2.35213e+07	2.26714e+07	2.20162e+07	2.29099e+07	2.40422e+07	2.329e+07	2.38047e+07	2.2263e+07	2.38054e+07	2.47906e+07	2.63665e+07	2.48224e+07	2.33641e+07	2.30775e+07	2.44788e+07	2.68755e+07	2.35011e+07	2.35166e+07	2.36684e+07	2.34419e+07	2.28438e+07	2.42111e+07	2.39726e+07	2.80011e+07	2.33702e+07	2.32762e+07	2.42848e+07	2.16996e+07	2.22972e+07	2.39644e+07	2.27971e+07	2.30854e+07	2.34008e+07	2.34463e+07	2.42355e+07	2.44516e+07	2.34348e+07	2.32101e+07	2.30078e+07	2.08268e+07	2.30795e+07	2.18104e+07	2.3492e+07	2.51719e+07	2.35614e+07
Q	1.86416e+07	1.86283e+07	1.81842e+07	1.86311e+07	1.77186e+07	1.86627e+07	1.85771e+07	1.78677e+07	1.89261e+07	1.89004e+07	1.81697e+07	1.8394e+07	1.92294e+07	1.81804e+07	1.8219e+07	1.88654e+07	1.83288e+07	1.8365e+07	1.87014e+07	1.83523e+07	1.81905e+07	1.84751e+07	1.85028e+07	1.83969e+07	1.87087e+07	1.85726e+07	1.87951e+07	1.51911e+07	1.92254e+07	1.84583e+07	1.90359e+07	1.75334e+07	1.72858e+07	1.86579e+07	1.82867e+07	1.83213e+07	2.05081e+07	1.84942e+07	1.99119e+07	1.79542e+07	1.83194e+07	1.82596e+07	1.839e+07	1.70903e+07	1.86203e+07	1.90102e+07	1.87172e+07	1.88326e+07	1.86481e+07
R	2.21601e+07	2.1804e+07	2.23638e+07	2.23028e+07	2.01593e+07	2.16286e+07	2.16367e+07	2.15558e+07	2.19975e+07	2.23561e+07	2.16317e+07	2.12816e+07	2.24964e+07	2.30594e+07	2.20345e+07	2.20604e+07	2.31936e+07	2.20595e+07	2.21681e+07	2.20232e+07	2.24028e+07	2.18898e+07	2.2772e+07	2.28385e+07	2.20017e+07	2.22019e+07	2.21131e+07	2.15886e+07	2.24214e+07	2.16161e+07	2.22402e+07	2.07442e+07	2.07179e+07	2.2445e+07	2.27815e+07	2.1617e+07	2.44682e+07	2.15813e+07	2.37395e+07	2.25966e+07	2.28205e+07	2.28802e+07	2.25253e+07	1.94561e+07	2.13709e+07	2.14735e+07	2.24442e+07	2.19963e+07	2.20166e+07
S	2.97886e+07	3.17903e+07	3.14018e+07	3.05527e+07	3.12079e+07	3.00745e+07	3.0338e+07	3.09177e+07	3.2547e+07	3.25245e+07	3.21497e+07	3.05937e+07	3.19545e+07	3.17837e+07	3.06639e+07	3.26382e+07	3.04422e+07	2.9926e+07	3.2218e+07	3.08803e+07	3.10029e+07	3.07404e+07	3.12305e+07	3.10364e+07	2.99326e+07	3.13895e+07	3.1146e+07	3.05424e+07	3.1417e+07	3.02664e+07	3.24386e+07	3.0925e+07	2.9159e+07	3.14352e+07	3.11608e+07	3.0913e+07	3.33434e+07	3.21056e+07	3.38765e+07	3.13811e+07	3.08416e+07	3.09699e+07	3.06537e+07	2.73103e+07	3.2042e+07	2.91112e+07	3.09438e+07	3.11553e+07	3.13581e+07
T	2.04023e+07	2.15009e+07	2.1523e+07	2.09965e+07	2.16115e+07	2.15378e+07	2.1261e+07	2.19726e+07	2.1762e+07	2.12133e+07	2.16405e+07	2.15139e+07	2.13748e+07	2.12736e+07	2.13611e+07	2.19565e+07	2.18075e+07	2.19155e+07	2.15811e+07	2.12995e+07	2.15447e+07	2.18395e+07	2.1492e+07	2.15699e+07	2.16154e+07	2.12141e+07	2.14879e+07	2.72478e+07	2.12672e+07	2.17569e+07	2.18044e+07	2.19865e+07	2.05221e+07	2.14312e+07	2.154e+07	2.16145e+07	2.20684e+07	2.12921e+07	2.13751e+07	2.14173e+07	2.16409e+07	2.16594e+07	2.14845e+07	2.17707e+07	2.19207e+07	2.16946e+07	2.15043e+07	2.10569e+07	2.15138e+07
V	2.51093e+07	2.52661e+07	2.48748e+07	2.49446e+07	2.54276e+07	2.53212e+07	2.526e+07	2.53584e+07	2.52733e+07	2.45023e+07	2.49897e+07	2.53872e+07	2.41947e+07	2.48677e+07	2.52666e+07	2.50124e+07	2.55258e+07	2.54804e+07	2.5111e+07	2.53397e+07	2.4773e+07	2.54142e+07	2.50389e+07	2.52604e+07	2.55428e+07	2.48086e+07	2.54762e+07	3.35995e+07	2.45968e+07	2.56461e+07	2.48338e+07	2.54317e+07	2.58787e+07	2.48107e+07	2.5719e+07	2.60722e+07	2.51596e+07	2.55843e+07	2.42264e+07	2.49035e+07	2.5278e+07	2.52265e+07	2.50765e+07	2.56126e+07	2.49304e+07	2.52423e+07	2.50776e+07	2.51382e+07	2.50934e+07
W	5.03494e+06	4.58699e+06	4.35175e+06	4.44974e+06	5.06962e+06	5.18912e+06	4.88508e+06	4.79069e+06	4.55485e+06	4.34038e+06	4.69528e+06	4.7043e+06	4.23506e+06	4.10288e+06	4.75558e+06	4.43532e+06	4.6326e+06	5.11815e+06	4.52731e+06	4.77052e+06	4.64107e+06	4.96949e+06	4.65136e+06	4.49539e+06	5.2355e+06	4.57702e+06	4.77004e+06	5.15097e+06	4.21285e+06	5.16495e+06	4.61527e+06	4.84822e+06	5.0325e+06	4.49325e+06	4.47406e+06	4.74294e+06	4.2914e+06	4.67759e+06	4.44458e+06	4.06654e+06	4.55388e+06	4.33904e+06	4.63257e+06	4.89709e+06	5.19051e+06	5.4491e+06	4.62372e+06	4.88892e+06	4.85169e+06
Y	1.12805e+07	1.09166e+07	1.08713e+07	1.15226e+07	1.18747e+07	1.13924e+07	1.09986e+07	1.1753e+07	1.0731e+07	1.07639e+07	1.10896e+07	1.10792e+07	1.05921e+07	1.07516e+07	1.12099e+07	1.07885e+07	1.12223e+07	1.15292e+07	1.08607e+07	1.12585e+07	1.13051e+07	1.14004e+07	1.12268e+07	1.10983e+07	1.15073e+07	1.108e+07	1.12394e+07	1.1564e+07	1.07228e+07	1.16154e+07	1.10497e+07	1.11557e+07	1.17209e+07	1.11324e+07	1.11573e+07	1.14902e+07	1.04922e+07	1.11203e+07	1.0782e+07	1.0719e+07	1.12169e+07	1.10406e+07	1.12101e+07	1.18547e+07	1.13814e+07	1.1596e+07	1.10877e+07	1.12357e+07	1.1283e+07
[truncated: 61 more columns]
