# Supplementary material for: Cell type–specific analysis by single-cell profiling identifies a stable mammalian tRNA–mRNA interface and increased translation efficiency in neurons
Source: HighWire-hosted journal article supplement (doi:10.1101/gr.275944.121), 2021-12-02
Supplement: Supplemental_Table_S5.xlsx [file Supplemental_Table_S5.xlsx]

## Sheet: tRNA_expression
# Table S5. Adult mouse tRNA gene expression by cell type matrix
	Bone_Marrow Hematopoietic progenitors	Bone_Marrow Erythroblasts	Bone_Marrow Monocytes	Cerebellum Inhibitory neurons	Cerebellum Cerebellar granule cells	Heart Endothelial II cells	Heart Cardiomyocytes	Kidney Proximal tubule	Kidney Proximal tubule S3	Kidney DCT CD	Kidney Loop of henle	Intestine Enterocytes	Liver Hepatocytes	Lung T cells	Lung B cells	Lung Dendritic cells	Lung Alveolar macrophages	Lung Type I pneumocytes	Lung Endothelial II cells	Prefrontal_Cortex Inhibitory neurons	Prefrontal_Cortex SOM Interneurons	Prefrontal_Cortex Ex neurons SCPN	Prefrontal_Cortex Ex neurons CPN	Prefrontal_Cortex Ex neurons CThPN	Spleen T cells	Spleen B cells	Spleen Dendritic cells	Testes Sperm	Thymus T cells	Brain Inhibitory neurons	Brain Astrocytes	Brain Oligodendrocytes	Brain Ex neurons SCPN	Brain Ex neurons CPN	Brain Ex neurons CThPN	Brain Cerebellar granule cells
tRNA-Glu-TTC-2-1	38.3237	47.3217	38.855	101.699	85.7545	35.1164	50.2156	21.9114	36.5643	74.1713	62.6533	65.5396	58.4179	72.441	59.3002	32.8947	81.1677	78.4301	42.6491	79.2447	88.7934	65.9032	87.0752	73.3484	67.6224	65.2126	31.4394	37.5131	66.041	69.5203	23.3066	13.3507	57.8993	56.5474	81.3504	75.376
tRNA-Gly-GCC-3-1	29.199	8.87281	8.96655	55.2081	29.193	28.3632	24.8986	28.0466	34.4135	21.1918	43.7116	35.9598	37.3277	27.1654	20.4148	21.1466	28.1602	27.903	24.9457	42.4525	56.7291	61.1391	61.7763	60.995	26.2976	20.7961	34.2975	41.4619	27.8883	50.0058	28.7905	32.0417	62.5313	96.2834	78.9578	23.0921
tRNA-Lys-CTT-7-1	49.2734	9.85868	5.9777	0	0	2.70126	2.09232	5.69697	1.07542	4.23836	1.45705	8.69994	2.98622	0	0.486067	2.34962	4.96945	3.01654	2.4141	0	2.46648	0.794014	1.17669	1.54418	1.8784	1.54045	0	23.6925	2.61453	3.04914	4.11292	1.33507	6.94792	1.52831	1.19633	1.3071
tRNA-Lys-TTT-1-1	80.2974	43.8711	37.3606	72.6422	32.8421	55.3758	72.8127	19.7203	25.8101	40.2644	39.3405	56.2596	47.7795	25.3544	39.8575	65.7894	71.2288	36.9527	49.8914	79.2447	64.1286	80.1955	88.8402	84.9297	39.4464	31.8361	57.1625	120.437	61.0056	65.8613	9.59682	16.0208	97.2709	71.8305	87.3321	39.2129
tRNA-Lys-TTT-1-2	36.4988	26.6184	22.4164	46.491	18.2456	32.4151	48.751	5.25875	11.8296	12.7151	16.0276	37.1198	21.2768	10.8662	21.387	28.1954	43.0686	13.5744	32.188	50.943	46.8632	54.787	56.4812	47.8695	13.1488	19.2557	25.7231	53.3081	23.2402	46.3469	9.59682	10.6806	41.6875	36.6794	61.0128	30.0633
tRNA-Pro-AGG-1-1	113.146	56.6874	85.1822	84.265	102.176	97.2453	87.8774	97.2868	104.316	99.6014	131.135	75.9795	99.8516	77.8741	88.4642	96.3344	74.5418	89.7422	100.588	90.5653	88.7934	85.7536	98.2537	89.5622	88.2848	88.0627	108.609	90.8212	82.7933	89.6446	72.6617	108.141	85.691	93.2268	62.2092	87.5756
tRNA-Pro-CGG-1-1	107.671	67.039	86.6766	55.2081	125.895	128.31	84.5297	120.075	105.391	114.436	126.764	98.5994	94.8124	105.039	95.7552	117.481	104.358	114.629	113.463	67.924	91.2599	61.9331	100.019	84.1576	94.8593	95.2515	114.325	134.257	84.9237	81.7168	105.565	153.533	78.7431	90.1702	87.3321	113.282
tRNA-Asn-GTT-3-1	54.7482	45.8429	29.8885	66.8308	87.579	32.4151	73.8588	62.6667	78.5058	27.5493	42.2546	52.7797	59.5377	67.0079	61.7305	44.6428	36.4426	36.9527	49.8914	76.4145	83.8604	84.1655	84.1334	83.3855	68.5616	70.6042	71.4531	80.9493	61.5866	93.3035	47.9841	32.0417	99.5868	87.1136	98.0991	92.3683
tRNA-Asp-GTC-1-1	45.6235	54.7157	41.8439	87.1706	129.544	47.272	47.7049	50.3963	68.827	31.7877	33.5122	44.0797	44.6066	56.1418	57.842	61.0901	44.7251	42.2316	41.8444	70.7542	73.9945	73.0493	81.7801	64.8554	56.352	54.9429	42.8719	45.4106	52	62.2024	41.1292	24.0312	85.691	79.472	56.2275	98.9038
tRNA-Gly-TCC-1-1	62.048	71.9683	82.1934	98.7934	135.018	90.4922	82.4373	82.8252	98.9388	82.648	62.6533	74.2395	78.2015	72.441	109.851	103.383	101.046	101.054	97.3687	73.5843	69.0615	87.3416	85.3101	89.5622	89.224	92.9408	88.6019	132.283	79.2104	82.9365	72.6617	105.47	90.3229	84.057	69.3871	122.432
tRNA-Leu-CAG-2-1	52.9233	48.3075	52.3049	78.4536	71.158	76.9859	66.3265	67.9255	61.299	61.4562	37.8834	53.9396	69.6162	72.441	77.2847	70.4886	62.9464	65.6098	75.6418	82.0748	71.528	65.9032	73.5432	76.4367	71.3792	74.7121	80.0275	112.539	53.2589	71.9596	61.6939	86.7795	46.3195	68.7739	80.1541	81.0401
tRNA-Gly-GCC-2-1	69.3477	64.5743	86.6766	101.699	140.491	93.1935	68.4188	96.4103	86.0337	95.3631	113.65	74.8195	80.8145	77.8741	78.2568	68.139	71.2288	90.4963	108.635	107.546	86.3269	95.2817	104.137	100.371	86.4064	87.0357	97.1762	154.001	86.6667	87.8151	102.823	100.13	106.535	87.1136	75.3688	105.875
tRNA-Glu-CTC-1-1	12.7746	3.94347	1.49442	5.81138	0	1.35063	4.6031	1.31469	2.15084	2.11918	0	1.15999	2.4263	1.81103	0.486067	0	11.5954	3.01654	4.0235	2.83017	0	2.38204	2.94173	2.31626	2.8176	1.7972	2.85812	9.87187	1.93669	3.04914	1.37097	1.33507	2.31597	0	3.58899	1.3071
tRNA-Gly-TCC-1-2	21.8993	7.39401	13.4498	11.6228	1.82456	1.35063	15.4832	4.38229	2.15084	6.35754	4.37116	11.5999	7.46554	1.81103	2.9164	9.39848	4.96945	3.01654	3.2188	2.83017	4.93297	7.14613	3.53007	6.1767	4.696	4.10788	11.4325	15.795	3.97021	7.31792	4.11292	2.67014	6.94792	6.11323	3.58899	0.871399
tRNA-Asp-GTC-1-2	3.64988	1.4788	1.49442	2.90569	0	0	4.6031	1.75292	0	2.11918	0	1.15999	1.86639	3.62205	0	2.34962	0	0	0.8047	2.83017	0	0	0.588346	0.772088	0.939201	0.770227	0	1.97437	0.774674	0	1.37097	0	0	0	1.19633	0
tRNA-Leu-CAG-1-1	7.29976	1.97174	2.98885	0	0	0	2.72001	0.438229	0	0	1.45705	6.37996	0.746554	0	0	0	0	1.50827	1.6094	2.83017	2.46648	0	2.35338	2.31626	0.939201	1.28371	0	5.92312	0.871508	1.21965	2.74195	1.33507	2.31597	0	1.19633	1.3071
tRNA-Gly-GCC-1-1	14.5995	2.46467	4.48327	0	1.82456	0	10.6708	2.62937	2.15084	0	0	3.47998	1.67975	3.62205	1.4582	2.34962	0	1.50827	2.4141	0	0	3.97007	1.76504	2.31626	2.8176	1.7972	0	3.94875	2.61453	2.43931	1.37097	2.67014	4.63195	1.52831	1.19633	0.871399
tRNA-Glu-CTC-1-2	1.82494	0.985868	0	0	0	0	2.51078	0	1.07542	0	0	0.579996	0.186639	0	0	0	0	0	0	2.83017	0	0	1.17669	1.54418	0	0	0	3.94875	0.581006	0.609827	0	2.67014	2.31597	0	2.39266	0
tRNA-Leu-CAG-1-2	1.82494	0.985868	0	0	0	1.35063	1.88309	0	0	0	0	1.15999	0.559916	0	0.486067	0	0	0.754136	0	0	0	0	0.588346	1.54418	0	0.513485	0	1.97437	0.290503	0	1.37097	0	0	0	0	0.435699
tRNA-Gly-GCC-1-2	27.3741	6.90107	2.98885	2.90569	0	1.35063	17.3662	3.0676	4.30169	0	1.45705	7.53995	1.30647	1.81103	3.40247	2.34962	13.2519	6.03309	1.6094	0	2.46648	3.97007	4.70677	9.26506	0	2.31068	8.57437	15.795	2.80819	6.7081	6.85487	0	9.26389	4.58492	5.98165	1.3071
tRNA-Glu-CTC-1-3	0	1.4788	0	0	0	1.35063	1.04616	1.31469	0	0	0	1.73999	0.933193	0	0	0	0	0	0	5.66033	0	0	0.588346	0	0	1.02697	0	0	0.67784	1.21965	0	0	0	0	1.19633	0.435699
tRNA-Leu-CAG-1-3	0	0.492934	0	5.81138	0	0	0.627695	0	0	0	0	1.15999	0	0	0.486067	0	3.31297	0.754136	0	0	2.46648	0	0	0.772088	0	0.513485	2.85812	0	0.0968343	0.609827	0	0	0	0	0	0
tRNA-Gly-GCC-1-3	3.64988	4.92934	4.48327	0	0	1.35063	8.99697	2.19114	0	0	2.91411	5.79996	2.23966	0	0.486067	9.39848	3.31297	1.50827	0	0	0	2.38204	0.588346	0	0.939201	2.31068	5.71625	3.94875	1.74302	1.21965	2.74195	1.33507	4.63195	1.52831	1.19633	0.435699
tRNA-Leu-CAG-1-4	58.3981	56.1945	38.855	92.982	87.579	31.0645	75.1142	47.3287	80.6566	16.9534	8.74232	55.6796	67.0032	47.0867	36.9411	42.2932	59.6334	41.4775	32.188	53.7732	69.0615	93.6937	70.0131	87.2459	43.2032	43.1327	34.2975	41.4619	41.9292	64.6417	54.839	38.717	101.903	74.8871	62.2092	71.4547
tRNA-Asp-GTC-1-5	45.6235	75.4189	43.3383	98.7934	113.123	60.7783	77.2065	60.0373	86.0337	25.4302	24.7699	71.9195	76.5218	56.1418	67.5633	65.7894	64.6029	55.806	57.1337	42.4525	76.461	65.1092	72.9549	74.8925	63.8656	64.6991	45.73	31.59	62.2644	70.1301	71.2907	62.7483	74.1111	100.868	83.7431	105.004
tRNA-Gly-TCC-1-5	62.048	68.0249	73.2268	72.6422	71.158	70.2328	66.9542	66.1726	92.4863	46.622	37.8834	57.9996	77.455	94.1733	73.3961	39.9435	51.351	63.3474	49.8914	53.7732	69.0615	61.9331	68.2481	67.9437	60.1088	72.4014	88.6019	21.7181	76.6927	58.5434	74.0326	48.0625	64.8472	82.5286	63.4055	80.6044
tRNA-Glu-CTC-1-4	56.5731	68.0249	70.238	55.2081	85.7545	79.6872	80.9727	79.3194	92.4863	42.3836	39.3405	66.6996	83.2408	108.662	81.6593	46.9924	57.9769	58.8226	82.8841	65.0938	81.3939	80.1955	97.077	98.8273	63.8656	80.1037	68.595	31.59	90.54	71.3498	75.4036	60.0781	76.4271	94.7551	58.6202	80.6044
tRNA-Val-CAC-2-1	63.8729	90.6998	85.1822	130.756	98.5264	110.752	87.6681	102.107	106.467	141.985	118.021	104.399	94.2525	92.3623	93.8109	79.8871	84.4807	107.841	119.9	65.0938	91.2599	91.3117	88.8402	84.9297	98.6161	96.7919	94.3181	49.3594	101.192	84.1561	83.6295	114.816	69.4792	79.472	95.7064	84.9614
tRNA-Arg-TCT-4-1	63.8729	0.492934	2.98885	72.6422	116.772	4.05189	1.67385	0.876458	2.15084	0	0	12.7599	1.86639	1.81103	2.43034	9.39848	3.31297	1.50827	1.6094	93.3955	83.8604	103.222	89.4286	95.7389	1.8784	1.54045	0	7.8975	2.22719	84.766	4.11292	5.34028	99.5868	116.151	86.1358	105.875
tRNA-Asn-GTT-3-2	52.9233	29.576	17.9331	78.4536	58.386	70.2328	63.8157	78.0047	44.0923	29.6685	39.3405	41.7597	84.9205	41.6536	27.2198	25.8458	33.1297	7.54136	85.2982	73.5843	96.1928	69.8733	80.015	67.9437	38.5072	33.3765	20.0069	61.2056	62.2644	60.3729	63.0648	62.7483	67.1632	67.2456	83.7431	61.8693
tRNA-Ala-CGC-2-1	114.971	82.32	138.982	104.605	235.369	121.557	110.265	90.2751	92.4863	137.747	142.791	108.459	116.649	153.937	132.696	122.18	117.61	128.957	126.338	124.527	118.391	118.308	109.432	109.636	132.427	111.426	114.325	120.437	122.689	120.136	98.7102	138.847	115.799	128.378	126.811	162.08
tRNA-Gly-GCC-2-2	78.4724	46.8287	68.7435	52.3024	142.316	72.934	61.7234	37.2495	39.7906	74.1713	52.4539	59.1596	53.3786	90.5513	61.7305	65.7894	79.5112	70.8888	59.5478	53.7732	69.0615	82.5775	72.9549	60.995	69.5008	58.794	91.46	59.2312	65.8473	68.9105	46.6131	69.4236	55.5833	71.8305	89.7248	84.09
tRNA-Lys-CTT-13-1	52.9233	1.4788	7.47212	2.90569	0	6.75315	1.46462	3.94406	1.07542	2.11918	2.91411	8.11995	1.30647	1.81103	1.94427	0	1.65648	3.01654	1.6094	2.83017	2.46648	1.58803	0	0	0.939201	1.54045	0	9.87187	1.93669	0.609827	0	0	0	1.52831	0	1.7428
tRNA-Asp-GTC-3-1	47.4484	5.42227	0	14.5284	1.82456	1.35063	2.51078	1.31469	6.45253	2.11918	4.37116	15.0799	5.22588	1.81103	1.4582	0	4.96945	3.77068	1.6094	0	0	3.97007	4.70677	3.86044	0	0.770227	5.71625	39.4875	1.06518	6.09827	2.74195	1.33507	4.63195	1.52831	4.78532	3.48559
tRNA-Ser-GCT-2-1	94.8969	101.544	89.6655	58.1138	80.2808	89.1416	73.4404	93.3427	92.4863	110.197	85.9662	74.8195	87.9067	114.095	84.0896	91.6352	64.6029	90.4963	94.1499	110.376	86.3269	83.3715	88.8402	102.688	82.6496	82.1576	88.6019	211.258	76.2086	89.6446	76.7746	109.476	115.799	77.9437	87.3321	91.0612
tRNA-His-GTG-2-1	124.096	80.3482	76.2157	78.4536	125.895	74.2846	57.5388	71.8695	66.6762	101.721	80.138	74.2395	63.4571	81.4961	85.0617	84.5863	64.6029	76.9218	95.7593	70.7542	98.6593	74.6374	68.2481	76.4367	90.1632	81.1306	82.8856	49.3594	76.3054	75.0087	46.6131	81.4392	83.375	77.9437	58.6202	101.518
tRNA-His-GTG-2-2	149.645	110.417	95.6432	113.322	114.947	106.7	74.4865	95.5339	97.8634	95.3631	68.4815	101.499	79.8813	88.7402	110.823	105.733	101.046	102.562	98.9781	87.7351	73.9945	63.5211	79.4267	77.9809	108.947	89.3464	85.7437	140.181	88.216	70.7399	75.4036	104.135	67.1632	77.9437	87.3321	76.2474
tRNA-His-GTG-2-3	164.245	130.627	103.115	78.4536	93.0527	72.934	93.7359	115.692	132.277	103.84	72.8527	107.879	99.665	115.906	86.0339	79.8871	86.1372	84.4632	85.2982	67.924	76.461	98.4578	82.3684	86.4739	92.0416	76.766	80.0275	104.642	94.8976	94.5232	71.2907	102.8	78.7431	85.5853	75.3688	84.9614
tRNA-Lys-CTT-12-1	25.5492	1.4788	1.49442	0	1.82456	6.75315	3.76617	9.20281	4.30169	0	1.45705	11.5999	2.79958	5.43308	1.4582	0	3.31297	3.77068	7.2423	0	0	0	1.17669	0.772088	0	1.28371	0	3.94875	1.25885	1.21965	1.37097	4.00521	2.31597	1.52831	1.19633	0
tRNA-Lys-CTT-4-1	18.2494	4.92934	2.98885	0	0	2.70126	4.6031	7.01166	3.22627	4.23836	1.45705	6.37996	3.17285	0	1.94427	0	0	3.77068	2.4141	0	0	0.794014	1.17669	0.772088	1.8784	1.54045	0	9.87187	0.67784	0.609827	0	1.33507	2.31597	0	0	0.435699
tRNA-Arg-ACG-2-1	91.247	92.6716	68.7435	63.9251	78.4562	64.8302	69.0465	92.0281	80.6566	74.1713	83.0521	63.2196	66.07	61.5749	64.6469	79.8871	74.5418	75.4136	70.8136	56.6033	44.3967	58.7571	62.953	57.9066	74.1968	68.2935	71.4531	134.257	69.6238	61.5925	61.6939	69.4236	48.6354	77.9437	57.4238	74.5046
tRNA-Tyr-GTA-4-1	135.046	165.133	124.037	136.567	162.386	147.219	119.053	181.427	138.729	137.747	174.846	136.299	111.05	135.827	126.377	159.774	125.893	165.91	166.573	121.697	113.458	130.218	100.019	107.32	142.758	117.331	157.197	217.181	133.244	122.575	174.114	162.878	138.958	117.68	117.24	135.502
tRNA-Tyr-GTA-3-1	156.945	191.258	164.387	95.8877	156.912	197.192	120.518	178.359	133.352	146.223	154.448	166.459	135.126	195.591	142.418	209.116	178.9	189.288	168.987	130.188	113.458	130.218	121.199	115.041	162.482	150.708	185.778	207.309	163.069	120.746	139.839	172.224	141.274	132.963	119.633	134.631
tRNA-Ala-AGC-4-1	135.046	145.415	131.509	84.265	120.421	136.414	96.6651	136.289	101.09	105.959	101.994	131.079	114.596	152.126	130.752	180.921	135.832	144.04	118.291	118.867	106.059	119.102	100.019	104.232	123.035	121.439	142.906	146.104	137.311	97.5723	80.8875	132.172	111.167	123.793	92.1174	103.696
tRNA-Leu-CAG-4-1	23.7242	6.90107	0	2.90569	9.12282	4.05189	1.25539	2.62937	1.07542	2.11918	2.91411	15.6599	3.54613	5.43308	0.972134	4.69924	3.31297	0.754136	0.8047	2.83017	0	1.58803	2.94173	2.31626	1.8784	1.28371	2.85812	9.87187	1.74302	3.65896	2.74195	4.00521	4.63195	3.05662	4.78532	2.1785
tRNA-Val-AAC-1-1	67.5228	116.825	86.6766	92.982	107.649	68.8821	84.9481	91.5898	73.1287	114.436	128.221	91.6394	93.3193	105.039	117.628	70.4886	71.2288	91.2504	90.1264	67.924	78.9275	95.2817	85.8985	83.3855	116.461	110.913	105.751	114.514	96.3501	79.2775	72.6617	98.7951	78.7431	79.472	88.5284	104.568
tRNA-Pro-TGG-2-1	31.024	24.6467	29.8885	5.81138	0	10.805	5.2308	7.01166	13.9805	4.23836	7.28527	51.0397	11.9449	23.5433	22.8452	30.5451	29.8167	4.52481	9.6564	8.4905	7.39945	25.4085	18.8271	19.3022	23.48	23.6203	45.73	19.7437	34.2793	11.5867	16.4517	12.0156	34.7396	12.2265	20.3376	3.48559
tRNA-Pro-AGG-1-2	21.8993	38.9418	41.8439	11.6228	5.47369	12.1557	9.62466	3.94406	16.1313	19.0726	7.28527	73.0795	15.1177	30.7874	34.0247	61.0901	33.1297	8.29549	14.4846	14.1508	19.7319	26.9965	15.8853	24.7068	39.4464	43.1327	48.5881	23.6925	52.4842	20.7341	20.5646	16.0208	18.5278	15.2831	27.5156	6.97119
tRNA-Val-CAC-7-1	12.7746	2.46467	0	2.90569	3.64913	4.05189	1.67385	2.62937	3.22627	0	1.45705	10.4399	3.54613	0	0	0	0	1.50827	0.8047	2.83017	2.46648	3.17606	2.35338	1.54418	0	0	2.85812	13.8206	1.54935	2.43931	2.74195	0	0	10.6982	8.37431	2.6142
tRNA-Gly-GCC-2-3	10.9496	3.45054	4.48327	43.5853	10.9474	18.9088	26.9909	10.0793	13.9805	21.1918	20.3988	21.4599	8.2121	19.9213	14.0959	21.1466	19.8778	21.8699	41.8444	65.0938	27.1313	34.9366	25.8872	38.6044	22.5408	17.972	14.2906	57.2568	21.1099	34.1503	19.1936	13.3507	20.8438	24.4529	53.8349	8.71399
tRNA-iMet-CAT-1-1	82.1223	90.2069	122.543	61.0194	89.4036	56.7265	50.2156	76.69	74.2041	101.721	110.736	54.5196	56.3648	83.3072	86.5199	103.383	66.2594	100.3	103.806	65.0938	88.7934	75.4314	82.3684	57.9066	73.2576	80.1037	94.3181	152.027	82.8901	67.6908	78.1456	106.806	64.8472	87.1136	75.3688	110.668
tRNA-Asn-GTT-2-1	7.29976	2.46467	1.49442	8.71706	1.82456	0	2.51078	1.31469	1.07542	0	1.45705	3.47998	2.4263	0	1.4582	2.34962	3.31297	2.26241	2.4141	2.83017	7.39945	5.5581	4.70677	5.40462	0	0.513485	0	29.6156	4.26071	5.48844	1.37097	1.33507	6.94792	1.52831	4.78532	1.7428
tRNA-Val-CAC-2-2	12.7746	5.42227	5.9777	8.71706	1.82456	0	6.48619	6.1352	3.22627	6.35754	7.28527	12.1799	3.54613	23.5433	16.5263	7.04886	11.5954	3.77068	1.6094	5.66033	4.93297	13.4982	7.64849	15.4418	26.2976	20.0259	11.4325	1.97437	19.9479	13.4162	9.59682	1.33507	13.8958	10.6982	14.356	1.7428
tRNA-Asn-GTT-1-1	12.7746	1.4788	5.9777	17.4341	0	0	3.34771	3.0676	6.45253	6.35754	4.37116	7.53995	1.67975	7.2441	7.29101	11.7481	11.5954	0.754136	4.0235	11.3207	7.39945	7.94014	10.0019	6.94879	6.5744	12.0669	5.71625	9.87187	6.7784	9.14741	10.9678	1.33507	16.2118	10.6982	9.57064	2.1785
tRNA-Asn-GTT-5-1	5.47482	0.492934	7.47212	8.71706	1.82456	2.70126	2.30155	1.31469	3.22627	0	2.91411	4.05997	1.11983	1.81103	0.972134	4.69924	9.9389	0	2.4141	2.83017	17.2654	5.5581	5.88346	8.49297	0.939201	3.33765	2.85812	5.92312	3.29237	7.31792	8.22585	0	11.5799	3.05662	4.78532	1.3071
tRNA-Gln-CTG-3-1	3.64988	4.92934	4.48327	5.81138	3.64913	2.70126	2.72001	5.25875	4.30169	6.35754	7.28527	10.4399	5.78579	9.05513	9.23527	4.69924	9.9389	4.52481	5.6329	0	4.93297	8.73416	10.0019	5.40462	11.2704	8.98599	8.57437	13.8206	11.1359	9.14741	8.22585	2.67014	16.2118	9.16985	8.37431	3.48559
tRNA-Gln-CTG-3-2	9.1247	2.9576	0	5.81138	1.82456	0	6.69542	5.25875	3.22627	4.23836	2.91411	11.5999	5.97243	0	2.43034	2.34962	3.31297	2.26241	1.6094	8.4905	0	5.5581	2.35338	8.49297	0.939201	3.33765	0	25.6669	5.22905	6.7081	8.22585	4.00521	4.63195	6.11323	8.37431	2.1785
tRNA-Asn-GTT-3-3	9.1247	15.7739	10.461	2.90569	1.82456	5.40252	6.06772	4.82052	3.22627	6.35754	0	15.6599	9.14529	3.62205	8.74921	4.69924	11.5954	3.01654	1.6094	2.83017	4.93297	10.3222	5.29511	7.72088	10.3312	8.21576	11.4325	84.8981	14.041	7.31792	4.11292	2.67014	16.2118	9.16985	10.767	1.7428
tRNA-His-GTG-2-4	12.7746	3.45054	7.47212	2.90569	3.64913	0	5.2308	1.75292	4.30169	8.47672	4.37116	17.9799	32.2885	1.81103	7.77707	4.69924	14.9084	0.754136	3.2188	8.4905	2.46648	7.14613	5.29511	6.1767	6.5744	8.4725	11.4325	31.59	5.81006	6.09827	1.37097	1.33507	4.63195	3.05662	4.78532	2.6142
tRNA-Gly-CCC-3-1	5.47482	5.42227	0	14.5284	0	1.35063	2.30155	1.75292	1.07542	2.11918	1.45705	7.53995	2.05302	0	2.43034	2.34962	19.8778	3.01654	0.8047	0	2.46648	6.35211	6.4718	12.3534	0.939201	4.36462	5.71625	3.94875	3.97021	9.14741	2.74195	0	11.5799	3.05662	9.57064	1.7428
tRNA-Lys-CTT-3-1	10.9496	53.7298	8.96655	8.71706	0	2.70126	9.8339	5.69697	13.9805	4.23836	2.91411	6.37996	3.91941	5.43308	7.77707	9.39848	11.5954	5.27895	4.8282	14.1508	2.46648	26.2025	10.5902	10.0371	14.088	10.2697	8.57437	5.92312	9.78026	15.8555	6.85487	2.67014	27.7917	13.7548	16.7486	0.871399
tRNA-His-GTG-3-1	7.29976	13.8021	2.98885	23.2455	1.82456	1.35063	7.11388	4.82052	1.07542	6.35754	1.45705	15.6599	1.67975	5.43308	7.77707	11.7481	8.28242	3.01654	0	25.4715	14.7989	29.3785	10.5902	20.8464	5.6352	8.21576	11.4325	15.795	8.61825	18.2948	2.74195	4.00521	34.7396	12.2265	20.3376	3.92129
tRNA-His-GTG-1-1	12.7746	1.97174	1.49442	2.90569	5.47369	4.05189	2.72001	1.31469	0	0	5.82822	15.0799	1.30647	1.81103	0.486067	0	4.96945	0.754136	0.8047	5.66033	2.46648	0.794014	2.35338	3.08835	0	0.770227	0	25.6669	1.54935	1.21965	1.37097	2.67014	4.63195	4.58492	4.78532	1.7428
tRNA-Gln-CTG-3-3	7.29976	8.87281	5.9777	5.81138	9.12282	1.35063	12.5539	2.62937	2.15084	2.11918	0	12.1799	2.4263	1.81103	1.4582	2.34962	8.28242	5.27895	0	8.4905	7.39945	10.3222	7.64849	7.72088	2.8176	2.05394	5.71625	17.7694	5.13222	2.43931	2.74195	5.34028	9.26389	6.11323	9.57064	4.79269
tRNA-Asn-GTT-3-6	60.223	50.2793	64.2603	78.4536	43.7895	14.8569	67.5819	80.1959	53.7711	50.8603	69.9386	45.2397	74.842	28.9764	53.4674	35.2443	31.4732	52.0354	24.141	48.1128	69.0615	69.8733	75.3083	59.4508	47.8992	55.1996	45.73	39.4875	50.838	54.2746	37.0163	28.0365	50.9514	67.2456	75.3688	57.948
tRNA-Lys-CTT-3-2	78.4724	70.9825	106.104	72.6422	80.2808	97.2453	85.9943	43.8229	58.0728	91.1247	75.7668	62.6396	67.5631	74.252	73.3961	65.7894	57.9769	64.8557	74.0324	79.2447	81.3939	70.6673	70.6015	84.9297	61.048	81.3874	60.0206	65.1543	88.6034	67.081	91.8553	72.0937	53.2674	87.1136	69.3871	79.733
tRNA-His-GTG-2-7	160.595	170.062	210.714	66.8308	182.456	144.517	106.499	122.266	116.146	171.654	163.19	125.859	126.541	188.347	162.346	190.319	154.053	152.335	157.721	121.697	108.525	117.514	110.609	118.129	145.576	148.14	180.062	102.667	137.505	114.038	143.952	161.543	127.379	106.982	99.2954	152.93
tRNA-Gly-TCC-1-6	109.496	143.444	134.498	87.1706	109.474	128.31	93.1082	102.107	73.1287	133.508	122.393	114.259	87.3468	157.559	132.21	117.481	122.58	123.678	115.877	76.4145	138.123	78.6074	98.2537	94.1947	110.826	113.223	120.041	65.1543	111.359	91.4741	111.049	149.528	76.4271	111.567	88.5284	113.718
tRNA-Glu-CTC-1-5	87.5971	98.5868	116.565	127.85	85.7545	101.297	94.3636	82.387	66.6762	122.912	94.7085	86.4194	86.7869	144.882	118.114	115.131	82.8242	122.17	107.83	96.2256	83.8604	73.0493	93.547	95.7389	92.9808	105.778	88.6019	61.2056	93.3482	83.5463	94.5973	125.497	62.5313	96.2834	88.5284	103.261
tRNA-Glu-CTC-1-6	40.1487	23.1679	5.9777	61.0194	47.4386	37.8176	49.5879	28.4849	32.2627	21.1918	20.3988	37.6998	40.5006	16.2992	16.0402	30.5451	51.351	16.591	48.282	62.2637	54.2626	66.6972	66.4831	47.8695	25.3584	16.4315	22.865	51.3337	27.9851	53.6648	49.3551	58.7431	60.2153	55.0191	51.4422	44.877
tRNA-Gln-CTG-4-1	62.048	19.2244	31.3829	34.8683	20.0702	20.2594	15.6924	20.1585	21.5084	14.8343	21.8558	55.6796	27.2492	38.0315	44.7182	82.2367	107.671	24.1323	37.8209	45.2827	49.3297	73.8433	77.0733	47.0974	63.8656	59.3075	82.8856	59.2312	66.622	44.5174	19.1936	13.3507	44.0035	68.7739	53.8349	17.428
tRNA-Arg-TCT-1-1	105.847	45.3499	73.2268	52.3024	102.176	64.8302	68.0003	92.4663	80.6566	72.0521	81.595	64.9596	69.9894	68.819	54.9256	46.9924	74.5418	89.7422	79.6653	48.1128	51.7961	57.963	55.3045	61.767	71.3792	66.2396	40.0137	116.488	57.8101	62.8122	58.9519	74.7639	53.2674	65.7173	57.4238	78.8616
tRNA-Ser-AGA-2-1	56.5731	70.9825	40.3495	52.3024	94.8773	90.4922	49.7972	61.352	56.9974	57.2179	101.994	40.0197	60.0976	83.3072	69.9937	54.0413	72.8853	33.9361	84.4935	67.924	76.461	85.7536	67.0714	76.4367	81.7104	64.1856	82.8856	112.539	75.1434	69.5203	82.2585	68.0885	53.2674	81.0003	76.5651	67.9691
tRNA-Ile-AAT-2-1	40.1487	6.40814	4.48327	0	3.64913	4.05189	3.34771	6.57343	3.22627	6.35754	1.45705	13.3399	3.91941	1.81103	1.4582	4.69924	6.62594	3.77068	3.2188	2.83017	0	6.35211	5.88346	3.08835	2.8176	0.770227	5.71625	13.8206	2.42086	2.43931	4.11292	1.33507	6.94792	1.52831	4.78532	2.1785
tRNA-Gly-CCC-4-1	14.5995	0.492934	0	5.81138	0	1.35063	2.51078	2.62937	1.07542	0	0	11.5999	2.05302	0	6.31887	0	3.31297	1.50827	1.6094	0	2.46648	2.38204	4.70677	1.54418	1.8784	9.24273	0	15.795	1.64618	4.87862	0	1.33507	4.63195	3.05662	7.17798	2.1785
tRNA-His-GTG-2-8	27.3741	6.90107	2.98885	37.7739	34.6667	1.35063	6.27695	7.88812	12.9051	6.35754	5.82822	17.3999	2.61294	1.81103	0.486067	2.34962	1.65648	2.26241	7.2423	28.3017	19.7319	42.8768	30.0056	44.7811	0	0.256742	25.7231	3.94875	1.25885	22.5636	9.59682	4.00521	46.3195	36.6794	41.8716	29.1919
tRNA-Ala-AGC-8-1	14.5995	18.7315	16.4387	14.5284	1.82456	6.75315	12.3447	22.3497	20.433	50.8603	32.0552	26.6798	16.2376	1.81103	19.4427	18.797	11.5954	22.6241	6.4376	14.1508	7.39945	12.7042	14.1203	15.4418	11.2704	23.6203	28.5812	47.385	14.4283	7.31792	12.3388	8.01042	9.26389	12.2265	14.356	4.35699
tRNA-Tyr-GTA-2-1	109.496	164.64	147.948	110.416	175.158	153.972	100.641	134.536	124.749	146.223	169.018	118.899	107.317	126.772	117.142	143.327	127.549	128.203	138.408	135.848	93.7264	92.1057	108.256	108.864	127.731	110.913	128.616	181.642	133.05	110.989	108.307	165.549	97.2709	97.8117	96.9027	138.117
tRNA-Ala-AGC-4-2	125.921	148.866	158.409	136.567	136.842	132.362	108.591	120.075	108.618	91.1247	173.389	99.7593	105.077	144.882	129.294	119.831	127.549	128.203	127.947	130.188	120.858	108.78	117.669	113.497	122.096	119.385	100.034	209.284	139.635	115.867	112.42	146.858	78.7431	113.095	89.7248	128.531
tRNA-Lys-CTT-5-1	12.7746	0.985868	1.49442	2.90569	0	1.35063	0.836927	0.438229	1.07542	0	0	3.47998	0.746554	0	2.43034	0	0	0.754136	0	0	0	0	1.17669	0.772088	0.939201	0.513485	0	5.92312	0.484171	0.609827	1.37097	0	0	1.52831	1.19633	0.435699
tRNA-Asp-GTC-4-1	23.7242	1.97174	0	0	0	4.05189	1.88309	1.31469	0	0	0	6.95995	1.67975	0	0	0	0	0	1.6094	0	4.93297	1.58803	2.94173	3.86044	0	0.256742	2.85812	3.94875	1.06518	6.7081	1.37097	0	2.31597	1.52831	5.98165	1.3071
tRNA-Met-CAT-6-1	31.024	1.4788	0	5.81138	1.82456	1.35063	1.04616	4.38229	3.22627	0	0	4.63997	0.186639	0	0	0	4.96945	0.754136	0	0	0	0.794014	0	0	1.8784	0	0	5.92312	1.45251	1.21965	0	0	0	1.52831	1.19633	0.435699
tRNA-Ala-TGC-2-1	25.5492	35.9842	34.3718	55.2081	10.9474	32.4151	68.628	56.9697	74.2041	33.9069	64.1104	48.7197	63.8304	28.9764	30.1362	25.8458	39.7556	39.9692	45.0632	50.943	61.6621	54.787	55.3045	58.6787	15.9664	30.0389	11.4325	23.6925	34.7635	60.9827	52.097	45.3924	50.9514	61.1323	63.4055	17.428
tRNA-Asp-GTC-1-6	74.8225	93.6574	85.1822	87.1706	62.0351	110.752	97.0836	106.928	104.316	125.032	109.279	91.0594	96.8654	92.3623	88.9503	103.383	110.984	104.071	125.533	104.716	71.528	82.5775	83.5451	88.7901	102.373	87.5492	94.3181	51.3337	99.933	77.448	116.533	142.852	127.379	84.057	101.688	62.305
tRNA-Phe-GAA-1-1	71.1727	90.6998	103.115	92.982	87.579	133.712	103.361	110.872	153.785	163.177	125.307	102.659	103.024	105.039	87.006	115.131	104.358	131.974	137.604	82.0748	96.1928	92.1057	87.6635	106.548	111.765	101.413	100.034	53.3081	100.998	113.428	102.823	174.894	120.431	91.6985	95.7064	78.4259
tRNA-Asp-GTC-1-7	40.1487	65.5602	41.8439	43.5853	7.29825	31.0645	74.905	66.1726	81.7321	38.1452	27.684	60.3196	83.8007	27.1654	35.4829	37.5939	62.9464	33.9361	45.8679	70.7542	71.528	69.8733	70.6015	81.8413	40.3856	32.6063	48.5881	29.6156	58.8752	58.5434	94.5973	56.0729	62.5313	70.3022	68.1908	10.0211
tRNA-Ala-TGC-4-1	32.8489	42.8852	35.8662	40.6796	5.47369	12.1557	68.4188	44.6993	55.9219	31.7877	14.5705	56.8396	65.5101	16.2992	13.1238	9.39848	28.1602	21.8699	26.5551	65.0938	61.6621	66.6972	63.5413	77.2088	20.6624	15.4045	8.57437	23.6925	30.8901	43.2977	80.8875	34.7118	64.8472	45.8492	63.4055	5.22839
tRNA-Asn-GTT-3-7	96.7218	56.1945	65.7547	75.5479	5.47369	68.8821	60.8865	64.4196	58.0728	59.337	80.138	64.3796	50.3924	48.8977	45.6903	75.1879	71.2288	78.4301	66.7901	56.6033	49.3297	50.0229	48.8327	50.1857	30.9936	46.7271	45.73	37.5131	41.6387	48.1763	58.9519	94.7899	67.1632	64.1889	38.2826	30.0633
tRNA-Val-CAC-4-1	21.8993	3.45054	4.48327	0	0	1.35063	1.04616	1.75292	1.07542	0	0	5.21997	1.11983	1.81103	1.94427	0	3.31297	2.26241	4.0235	0	0	1.58803	2.94173	1.54418	2.8176	1.7972	0	1.97437	2.13035	2.43931	4.11292	1.33507	0	3.05662	0	0.435699
tRNA-Pro-AGG-1-3	21.8993	16.7598	2.98885	11.6228	12.7719	48.6227	51.2618	25.8555	27.961	57.2179	23.3129	34.7998	39.9406	1.81103	4.86067	4.69924	6.62594	15.0827	57.1337	11.3207	7.39945	25.4085	17.6504	17.758	3.7568	1.28371	14.2906	29.6156	6.19739	18.2948	23.3066	5.34028	13.8958	19.868	23.9266	17.428
tRNA-Arg-CCT-4-1	182.494	145.908	144.959	90.0763	153.263	112.102	76.1604	126.21	111.844	148.343	144.248	117.159	87.5335	135.827	140.959	129.229	102.702	136.499	143.237	62.2637	64.1286	81.7835	83.5451	88.7901	125.853	121.696	140.048	130.309	110.004	75.6186	123.388	138.847	90.3229	88.6419	80.1541	136.374
tRNA-Cys-GCA-3-1	36.4988	15.281	11.9554	29.0569	18.2456	17.5582	17.157	46.8905	48.394	31.7877	20.3988	24.3598	49.0859	12.6772	17.9845	32.8947	14.9084	33.182	22.5316	14.1508	19.7319	24.6144	20.5921	20.0743	3.7568	11.2967	11.4325	23.6925	21.7877	22.5636	32.9034	28.0365	32.4236	19.868	29.9083	22.6564
tRNA-Cys-GCA-4-1	16.4245	0.492934	0	2.90569	1.82456	0	1.67385	0.876458	1.07542	0	0	5.21997	1.67975	0	0.486067	4.69924	0	1.50827	2.4141	0	0	3.97007	0.588346	0.772088	0	0.513485	0	19.7437	0.484171	1.82948	0	0	2.31597	3.05662	2.39266	1.7428
tRNA-Cys-GCA-16-1	12.7746	1.4788	0	0	0	0	1.25539	0.438229	0	0	0	8.11995	0.559916	3.62205	0.972134	0	1.65648	2.26241	0.8047	0	2.46648	0.794014	0.588346	1.54418	0.939201	0	0	5.92312	0.290503	1.21965	1.37097	2.67014	0	1.52831	3.58899	2.1785
tRNA-Cys-GCA-14-1	5.47482	1.4788	0	5.81138	0	0	1.88309	0.438229	0	0	0	3.47998	0.746554	0	0	0	1.65648	0.754136	0.8047	0	0	0.794014	0.588346	3.08835	1.8784	0	0	0	0.290503	1.21965	1.37097	0	2.31597	1.52831	0	0.435699
tRNA-Cys-GCA-4-2	5.47482	0.985868	1.49442	2.90569	0	0	1.04616	0.876458	0	0	0	1.73999	0.186639	0	0	4.69924	0	0	0	0	0	0	0.588346	0.772088	0	0.256742	0	1.97437	0.193669	1.21965	0	0	0	0	1.19633	0
tRNA-Cys-GCA-4-3	10.9496	0	0	5.81138	0	2.70126	1.04616	0.876458	1.07542	0	0	5.21997	1.11983	0	0.486067	2.34962	0	1.50827	0.8047	0	0	1.58803	0	1.54418	0	0	0	1.97437	0.290503	1.82948	0	0	2.31597	0	0	1.7428
tRNA-Cys-GCA-4-4	10.9496	0.492934	0	0	0	0	0.209232	1.31469	0	0	0	3.47998	0	0	0	0	1.65648	0	1.6094	0	0	1.58803	0	0	0	0	0	3.94875	0.484171	1.21965	0	0	0	0	0	0.435699
tRNA-Cys-GCA-4-5	16.4245	0.985868	0	2.90569	1.82456	0	0.836927	0.438229	2.15084	0	1.45705	8.11995	0.746554	0	0.972134	0	0	0.754136	1.6094	2.83017	0	1.58803	0	3.86044	0	0	0	13.8206	0.0968343	2.43931	4.11292	0	0	0	5.98165	0.871399
tRNA-Cys-GCA-4-6	12.7746	0.985868	1.49442	2.90569	0	0	1.67385	1.31469	0	0	1.45705	8.11995	0.559916	0	0.972134	0	1.65648	0	0.8047	0	2.46648	2.38204	1.17669	2.31626	0	0	2.85812	9.87187	0.484171	3.04914	1.37097	0	0	0	4.78532	0.435699
tRNA-Cys-GCA-19-1	32.8489	0.492934	0	2.90569	3.64913	0	2.92925	0.438229	1.07542	0	0	9.85994	0.933193	0	0.486067	2.34962	3.31297	0	0.8047	0	2.46648	3.17606	3.53007	4.63253	0	0	0	13.8206	0.581006	6.09827	1.37097	1.33507	2.31597	3.05662	2.39266	3.0499
tRNA-Cys-GCA-4-7	31.024	0.492934	0	5.81138	3.64913	0	2.72001	0.438229	1.07542	0	0	8.69994	0.186639	0	1.94427	0	0	0	0.8047	2.83017	4.93297	2.38204	1.76504	4.63253	0	0	0	7.8975	0.484171	3.65896	1.37097	0	0	3.05662	3.58899	2.1785
tRNA-Cys-GCA-25-1	25.5492	0.492934	2.98885	2.90569	1.82456	2.70126	2.92925	1.75292	1.07542	2.11918	0	9.85994	2.05302	0	0.486067	0	0	3.77068	0.8047	0	0	6.35211	2.35338	4.63253	0	0	0	29.6156	0.387337	6.09827	1.37097	0	2.31597	3.05662	0	3.0499
tRNA-Cys-GCA-4-8	1.82494	0.492934	1.49442	0	0	1.35063	1.67385	0	1.07542	0	0	4.05997	0.746554	0	0	0	1.65648	0.754136	0	0	0	3.17606	1.17669	0.772088	0.939201	0	0	7.8975	0.193669	4.87862	0	0	2.31597	4.58492	2.39266	0.871399
tRNA-Cys-GCA-7-1	16.4245	0.985868	0	5.81138	0	1.35063	2.09232	0.438229	1.07542	0	0	20.2999	0.746554	1.81103	0.972134	0	0	0.754136	0	2.83017	2.46648	10.3222	7.06015	4.63253	0	0	0	19.7437	0.290503	4.26879	0	2.67014	11.5799	1.52831	5.98165	3.0499
tRNA-Cys-GCA-4-9	18.2494	0	1.49442	5.81138	3.64913	0	2.30155	2.19114	1.07542	2.11918	1.45705	8.69994	1.30647	0	0.972134	0	0	0.754136	0.8047	0	0	5.5581	2.35338	3.08835	0	0	0	11.8462	0.484171	6.7081	0	1.33507	6.94792	0	4.78532	0.871399
tRNA-Cys-GCA-8-1	9.1247	0.492934	0	0	1.82456	0	2.30155	0.876458	1.07542	0	1.45705	8.11995	0.746554	0	1.4582	2.34962	3.31297	1.50827	0.8047	0	0	2.38204	2.94173	0.772088	0	0	0	3.94875	0.484171	0.609827	0	0	6.94792	0	2.39266	1.3071
tRNA-Cys-GCA-4-10	14.5995	0.492934	1.49442	5.81138	0	2.70126	1.67385	0.438229	1.07542	0	0	5.79996	0.559916	0	0.972134	0	0	0.754136	4.0235	14.1508	2.46648	2.38204	1.17669	4.63253	0.939201	0	0	11.8462	0.193669	5.48844	0	0	0	3.05662	4.78532	2.1785
tRNA-Cys-GCA-4-11	27.3741	1.4788	0	0	1.82456	4.05189	1.25539	1.31469	1.07542	0	0	8.69994	1.11983	0	0	0	3.31297	0.754136	0.8047	5.66033	7.39945	3.97007	4.70677	3.86044	0	0	5.71625	13.8206	0.193669	4.26879	2.74195	4.00521	6.94792	0	1.19633	1.3071
tRNA-Cys-GCA-12-1	20.0743	0.985868	4.48327	2.90569	1.82456	1.35063	1.88309	0.876458	1.07542	2.11918	1.45705	13.9199	0.746554	0	0	4.69924	3.31297	1.50827	0.8047	2.83017	2.46648	1.58803	1.17669	2.31626	0.939201	0	0	21.7181	0.0968343	6.09827	2.74195	1.33507	2.31597	4.58492	2.39266	0.435699
tRNA-Cys-GCA-4-12	5.47482	0.492934	2.98885	2.90569	1.82456	2.70126	2.92925	1.75292	0	0	0	9.27994	2.4263	0	0.486067	2.34962	0	0.754136	0.8047	2.83017	4.93297	10.3222	7.64849	3.08835	0	0.256742	0	23.6925	0.290503	7.92775	2.74195	0	11.5799	7.64154	2.39266	3.0499
tRNA-Cys-GCA-4-13	7.29976	0	1.49442	0	0	0	0.418464	0.438229	0	0	0	5.79996	0.933193	0	0	0	1.65648	0	1.6094	0	0	1.58803	2.35338	2.31626	0	0	0	3.94875	0.0968343	3.65896	1.37097	0	0	0	0	0.435699
tRNA-Cys-GCA-4-14	18.2494	2.46467	1.49442	2.90569	1.82456	1.35063	2.51078	0.438229	0	0	1.45705	11.5999	1.30647	0	0	0	1.65648	1.50827	0	2.83017	2.46648	1.58803	2.94173	0.772088	0	0.513485	0	5.92312	0.193669	3.04914	0	1.33507	0	1.52831	1.19633	0.435699
tRNA-Cys-GCA-4-15	7.29976	1.4788	0	0	0	0	0.836927	0	0	0	0	1.73999	0.373277	0	0	2.34962	0	0.754136	0	0	2.46648	0	0	0	0	0.256742	0	1.97437	0	1.21965	0	0	0	1.52831	1.19633	0.871399
tRNA-Cys-GCA-4-16	25.5492	0.985868	0	5.81138	0	2.70126	1.67385	1.31469	1.07542	0	0	8.11995	1.86639	0	0.486067	0	0	1.50827	0	5.66033	0	2.38204	2.94173	2.31626	0	0.256742	2.85812	13.8206	0.290503	2.43931	4.11292	0	0	6.11323	0	1.7428
tRNA-Cys-GCA-11-1	12.7746	1.97174	0	0	0	0	1.88309	0.876458	2.15084	0	0	3.47998	1.30647	0	0.486067	0	1.65648	0.754136	3.2188	2.83017	0	2.38204	1.76504	1.54418	0	0.513485	0	3.94875	0.290503	1.21965	0	0	4.63195	3.05662	0	1.7428
tRNA-Cys-GCA-6-1	18.2494	0.985868	0	2.90569	3.64913	5.40252	2.51078	0.438229	1.07542	0	0	4.05997	0.933193	0	0	2.34962	1.65648	0	1.6094	0	2.46648	0.794014	1.76504	0.772088	0	0	0	3.94875	0.581006	3.04914	0	0	0	0	2.39266	2.1785
tRNA-Cys-GCA-4-17	7.29976	0.985868	0	0	0	0	1.46462	0.438229	0	0	1.45705	4.05997	0.186639	0	0	0	4.96945	0	0	2.83017	0	2.38204	1.17669	0.772088	0	0	0	3.94875	0	2.43931	1.37097	0	2.31597	0	0	0.871399
tRNA-Cys-GCA-4-18	5.47482	0.492934	0	0	0	0	1.25539	0.438229	2.15084	0	0	5.79996	0.746554	0	0.972134	0	1.65648	0.754136	1.6094	0	2.46648	1.58803	0	2.31626	0	0.513485	2.85812	5.92312	0.193669	1.21965	0	0	0	0	3.58899	0.871399
tRNA-Cys-GCA-21-1	10.9496	0	0	2.90569	0	0	1.25539	0.438229	0	0	0	6.95995	0.559916	0	0	0	1.65648	0	0.8047	0	0	3.17606	0.588346	0.772088	0.939201	0	0	11.8462	0.193669	0.609827	0	0	2.31597	1.52831	0	0.871399
tRNA-Cys-GCA-9-1	5.47482	0.492934	0	0	0	0	0.836927	1.31469	0	0	0	1.73999	0.186639	0	0.486067	0	1.65648	0	0	0	0	0	0.588346	1.54418	0	0	0	3.94875	0.193669	0.609827	0	0	0	0	0	0.435699
tRNA-Cys-GCA-18-1	10.9496	0	0	0	0	0	1.46462	0.438229	0	0	0	6.95995	0.559916	0	0.486067	0	0	0	0	0	0	0.794014	1.17669	1.54418	0	0	0	1.97437	0	1.21965	0	2.67014	0	0	0	1.3071
tRNA-Cys-GCA-15-1	10.9496	0.492934	0	0	0	0	1.67385	0.876458	1.07542	0	0	4.05997	0.933193	0	0	0	1.65648	0	0.8047	2.83017	0	0	0.588346	0	0	0.513485	0	7.8975	0.0968343	0.609827	0	0	4.63195	0	3.58899	0
tRNA-Cys-GCA-4-19	9.1247	0	0	2.90569	0	2.70126	0.836927	0.876458	0	0	0	2.89998	1.11983	0	0	0	1.65648	0	1.6094	0	0	0.794014	0.588346	0	0	0	0	0	0.290503	0	1.37097	0	0	0	0	1.7428
tRNA-Cys-GCA-17-1	10.9496	0	0	0	1.82456	2.70126	0.418464	0.438229	1.07542	0	0	4.05997	0.373277	0	0	0	1.65648	0	1.6094	0	0	2.38204	0.588346	0.772088	0	0	2.85812	7.8975	0.193669	2.43931	0	0	0	1.52831	2.39266	2.1785
tRNA-Cys-GCA-4-20	5.47482	0.492934	1.49442	2.90569	0	0	0.836927	0.876458	1.07542	0	1.45705	1.15999	1.30647	0	0	0	0	0	1.6094	0	2.46648	1.58803	1.17669	0	0	0	0	1.97437	0.193669	0.609827	0	1.33507	0	1.52831	0	0.435699
tRNA-Cys-GCA-4-21	3.64988	0.985868	0	0	0	0	1.25539	0	0	0	0	1.73999	0.186639	0	0	2.34962	0	0	0	0	0	0.794014	1.17669	0	0	0	0	0	0.0968343	0	0	0	0	1.52831	1.19633	0.871399
tRNA-Cys-GCA-4-22	3.64988	0.492934	1.49442	0	0	2.70126	1.46462	0.438229	3.22627	0	0	6.37996	1.86639	0	0	0	1.65648	1.50827	1.6094	0	2.46648	3.17606	1.17669	0.772088	0	0	0	13.8206	0.193669	2.43931	0	1.33507	2.31597	0	3.58899	0.435699
tRNA-Cys-GCA-4-23	1.82494	1.97174	0	0	0	1.35063	0.836927	0	2.15084	0	0	3.47998	1.30647	0	0	0	1.65648	0.754136	0	0	2.46648	0.794014	0.588346	0.772088	0	0.256742	0	1.97437	0.0968343	2.43931	0	1.33507	0	1.52831	4.78532	1.7428
tRNA-Cys-GCA-4-24	12.7746	0.985868	0	0	1.82456	2.70126	0.627695	0	0	0	1.45705	6.37996	1.49311	1.81103	0	2.34962	0	0.754136	0.8047	2.83017	0	0	1.76504	0	0	0.256742	0	1.97437	0.290503	1.21965	0	0	2.31597	0	2.39266	0.871399
tRNA-Cys-GCA-10-1	9.1247	0.492934	0	2.90569	0	0	1.25539	0	1.07542	0	0	2.89998	0.559916	0	0	0	1.65648	1.50827	0.8047	2.83017	0	1.58803	4.11842	3.08835	0	0.256742	0	7.8975	0.484171	1.21965	1.37097	1.33507	0	1.52831	0	0.871399
tRNA-Cys-GCA-24-1	7.29976	0.492934	0	0	0	1.35063	0.418464	0	0	0	0	1.15999	0.186639	0	0	0	1.65648	0	1.6094	5.66033	0	0	0.588346	0	0	0	2.85812	3.94875	0	0	0	1.33507	2.31597	0	3.58899	0.871399
tRNA-Cys-GCA-4-25	12.7746	0.985868	0	0	0	1.35063	1.04616	0.438229	1.07542	0	1.45705	3.47998	0.746554	0	0	0	0	0.754136	0.8047	0	2.46648	1.58803	0	0	0	0.256742	0	5.92312	0.290503	1.21965	0	0	0	1.52831	1.19633	0.871399
tRNA-Cys-GCA-4-26	10.9496	1.4788	0	2.90569	0	0	0.836927	0.438229	0	0	0	5.21997	2.05302	0	0	0	0	1.50827	1.6094	0	0	0	0	0	0	0	0	5.92312	0.0968343	2.43931	2.74195	1.33507	0	1.52831	0	0
tRNA-Cys-GCA-4-27	16.4245	0	1.49442	0	0	0	1.46462	0	0	0	0	7.53995	1.86639	0	0	0	0	1.50827	0.8047	0	0	3.17606	1.17669	0	0.939201	0.513485	0	5.92312	0	1.82948	0	0	0	4.58492	0	0.435699
tRNA-Cys-GCA-13-1	12.7746	0.492934	0	0	0	1.35063	0.627695	0	1.07542	0	0	3.47998	0.746554	0	0	0	0	0.754136	0	0	0	2.38204	0.588346	0.772088	0	0	0	7.8975	0.387337	3.04914	0	0	2.31597	0	0	0
tRNA-Cys-GCA-4-28	3.64988	0.492934	0	5.81138	3.64913	0	0.209232	0	0	0	0	0.579996	0.373277	0	0	0	0	0	0.8047	0	0	1.58803	1.17669	1.54418	0.939201	0	2.85812	1.97437	0.0968343	0.609827	0	0	0	0	0	0.435699
tRNA-Gly-CCC-1-1	43.7986	51.2651	43.3383	72.6422	80.2808	67.5315	73.6496	61.352	58.0728	61.4562	53.911	58.5796	58.4179	28.9764	58.328	42.2932	62.9464	40.7233	74.0324	96.2256	83.8604	94.4877	80.015	89.5622	49.7776	65.2126	94.3181	90.8212	53.743	90.8642	74.0326	89.4496	83.375	88.6419	69.3871	88.8827
tRNA-SeC-TCA-1-1	49.2734	35.9842	115.071	84.265	67.5088	71.5834	66.5357	98.1633	95.7125	52.9795	88.8803	70.1795	77.6416	72.441	54.9256	54.0413	82.8242	74.6594	116.682	87.7351	73.9945	71.4613	88.2519	89.5622	89.224	79.3334	80.0275	106.616	65.6536	87.8151	76.7746	80.1042	113.483	77.9437	92.1174	84.5257
tRNA-Ile-TAT-1-1	208.043	112.882	198.758	104.605	51.0878	164.777	101.477	139.357	110.768	131.389	122.393	124.699	98.3585	105.039	145.334	183.27	124.236	134.99	165.768	67.924	61.6621	63.5211	72.3665	70.26	110.826	131.452	131.474	82.9237	98.4805	93.9134	115.162	121.491	74.1111	88.6419	70.5835	46.1841
tRNA-Lys-TTT-2-1	9.1247	6.90107	14.9442	5.81138	1.82456	6.75315	5.44003	14.0233	8.60337	10.5959	7.28527	11.5999	9.14529	9.05513	12.6377	4.69924	4.96945	5.27895	12.0705	5.66033	0	7.94014	5.29511	6.94879	20.6624	10.2697	5.71625	3.94875	20.3352	10.3671	10.9678	6.67535	6.94792	4.58492	8.37431	2.6142
tRNA-Thr-AGT-1-1	83.9472	40.4206	107.599	133.662	118.597	102.648	92.2712	139.795	144.107	116.555	103.451	82.3595	106.011	106.85	85.0617	86.936	86.1372	89.7422	124.729	127.357	98.6593	101.634	110.021	95.7389	123.035	84.725	108.609	104.642	103.032	110.989	115.162	105.47	94.9549	126.85	107.67	99.7752
tRNA-Glu-TTC-1-1	124.096	16.2668	50.8104	98.7934	89.4036	83.739	59.0034	123.142	94.6371	74.1713	67.0245	103.239	78.7615	90.5513	44.2321	54.0413	87.7936	78.4301	87.7123	104.716	88.7934	73.8433	78.8383	76.4367	103.312	44.4164	51.4462	33.5644	79.9851	84.1561	75.4036	62.7483	92.6389	74.8871	81.3504	80.1687
tRNA-Arg-TCG-1-1	125.921	86.2634	98.632	95.8877	96.7018	109.401	76.7881	122.704	112.919	91.1247	97.6226	92.7994	108.624	99.6064	102.074	119.831	102.702	113.874	125.533	96.2256	103.592	88.9296	96.4887	82.6134	87.3456	85.752	65.7369	150.052	75.6276	96.9625	102.823	78.7691	94.9549	96.2834	70.5835	99.7752
tRNA-Pro-TGG-1-1	87.5971	34.9983	101.621	87.1706	98.5264	98.596	95.2005	81.9488	107.542	82.648	104.908	58.5796	89.7731	85.1182	87.4921	75.1879	69.5723	109.35	108.635	93.3955	91.2599	84.9595	80.6034	83.3855	82.6496	71.6312	108.609	84.8981	80.9535	100.012	105.565	106.806	92.6389	105.453	89.7248	88.0113
tRNA-Pro-AGG-1-4	65.6978	34.9983	85.1822	61.0194	67.5088	58.0771	89.1328	81.9488	84.9583	46.622	72.8527	52.7797	75.0287	68.819	67.0773	77.5375	71.2288	75.4136	80.47	73.5843	83.8604	70.6673	68.8365	70.26	77.9536	52.889	77.1694	65.1543	65.46	87.8151	71.2907	77.434	64.8472	70.3022	62.2092	67.5334
tRNA-Glu-CTC-5-1	21.8993	6.40814	10.461	8.71706	1.82456	6.75315	2.51078	2.19114	2.15084	4.23836	1.45705	17.3999	1.67975	0	1.94427	2.34962	4.96945	4.52481	3.2188	14.1508	7.39945	3.97007	8.82519	6.1767	2.8176	1.7972	11.4325	5.92312	2.32402	14.026	27.4195	1.33507	6.94792	3.05662	2.39266	1.3071
tRNA-Leu-TAG-3-1	169.719	123.233	149.442	104.605	114.947	128.31	89.9697	97.2868	94.6371	125.032	119.478	82.3595	86.227	144.882	123.461	115.131	114.297	105.579	132.776	113.207	54.2626	88.1356	92.3703	86.4739	117.4	119.129	82.8856	29.6156	119.009	98.1822	93.2263	121.491	92.6389	105.453	96.9027	107.618
tRNA-Leu-AAG-2-1	125.921	106.967	110.587	92.982	60.2106	102.648	67.3726	54.3404	66.6762	63.5754	67.0245	78.2995	71.2959	67.0079	95.2691	84.5863	71.2288	47.5106	102.197	84.905	61.6621	49.2289	60.5996	77.2088	77.0144	84.4683	68.595	73.0518	87.2477	64.6417	91.8553	82.7743	69.4792	53.4908	58.6202	60.9979
tRNA-Leu-CAG-3-1	41.9736	2.46467	0	2.90569	0	0	1.67385	7.88812	1.07542	0	4.37116	6.37996	1.11983	1.81103	1.4582	4.69924	1.65648	3.01654	2.4141	0	0	1.58803	2.35338	1.54418	2.8176	1.28371	0	3.94875	2.13035	3.04914	1.37097	1.33507	6.94792	4.58492	1.19633	0.435699
tRNA-Leu-CAG-2-2	74.8225	80.8412	55.2937	87.1706	29.193	63.4796	68.628	65.7343	76.3549	65.6946	49.5398	76.5595	76.7084	32.5985	57.842	72.8382	77.8547	57.3143	79.6653	59.4335	71.528	62.7271	71.1898	64.0833	66.6832	59.0508	60.0206	86.8725	49.676	73.7891	68.5487	90.7847	81.059	70.3022	63.4055	33.1132
tRNA-Leu-CAG-2-3	98.5468	100.066	83.6878	87.1706	111.298	91.8428	77.4158	88.084	103.24	74.1713	87.4232	89.3194	89.2132	63.3859	73.3961	84.5863	102.702	88.2339	90.1264	65.0938	86.3269	69.8733	94.1353	77.9809	71.3792	74.1986	85.7437	138.206	70.3985	84.766	97.3392	113.481	92.6389	65.7173	62.2092	80.1687
tRNA-Gly-GCC-2-4	25.5492	5.42227	4.48327	14.5284	7.29825	63.4796	6.69542	3.50583	4.30169	0	8.74232	24.3598	4.8526	3.62205	1.4582	4.69924	0	1.50827	35.4068	25.4715	34.5308	29.3785	21.1804	20.0743	1.8784	0.770227	0	19.7437	3.6797	13.4162	9.59682	1.33507	23.1597	13.7548	13.1596	6.09979
tRNA-Gly-GCC-2-5	38.3237	3.45054	4.48327	5.81138	5.47369	27.0126	4.39387	2.19114	3.22627	0	8.74232	16.8199	4.47932	0	1.4582	4.69924	3.31297	0.754136	17.7034	5.66033	12.3324	19.0563	12.3553	13.1255	0.939201	1.54045	0	15.795	2.42086	8.53758	12.3388	1.33507	9.26389	13.7548	10.767	5.66409
tRNA-Gly-GCC-4-1	58.3981	25.1396	17.9331	81.3593	49.2632	44.5708	17.157	5.25875	4.30169	6.35754	2.91411	21.4599	21.2768	50.7087	30.6222	37.5939	28.1602	19.6075	45.8679	56.6033	76.461	63.5211	69.4248	62.5391	46.96	36.2007	22.865	59.2312	46.1899	67.081	35.6453	37.3819	55.5833	70.3022	76.5651	55.3338
tRNA-Met-CAT-1-1	78.4724	44.364	50.8104	46.491	67.5088	25.662	75.3235	54.3404	50.5448	63.5754	100.537	91.0594	80.0679	63.3859	47.6346	32.8947	26.5037	79.9384	35.4068	53.7732	41.9302	71.4613	64.718	69.4879	39.4464	47.7541	31.4394	59.2312	70.3017	68.9105	26.0485	29.3715	74.1111	67.2456	59.8165	59.6908
tRNA-Lys-CTT-6-1	38.3237	1.97174	0	2.90569	1.82456	2.70126	3.34771	1.31469	0	0	0	8.69994	2.79958	1.81103	1.94427	0	0	3.01654	4.0235	0	2.46648	2.38204	5.29511	6.94879	1.8784	0.256742	2.85812	7.8975	1.25885	4.26879	0	0	6.94792	3.05662	3.58899	3.48559
tRNA-Gln-CTG-2-1	104.022	79.3624	137.487	72.6422	62.0351	68.8821	78.8804	70.1166	69.9024	110.197	78.6809	83.5195	78.0149	67.0079	79.2289	77.5375	89.4501	73.9053	80.47	67.924	103.592	85.7536	78.25	91.8785	75.136	71.1177	80.0275	132.283	61.0056	76.8382	83.6295	96.125	76.4271	76.4154	90.9211	60.5622
tRNA-Lys-CTT-2-1	52.9233	38.9418	44.8327	46.491	12.7719	32.4151	48.9602	42.07	46.2431	72.0521	64.1104	33.0598	59.5377	77.8741	58.8141	58.7405	34.7862	30.9196	43.4538	79.2447	22.1983	28.5845	35.8891	34.744	73.2576	56.4833	57.1625	15.795	66.041	43.2977	30.1614	44.0573	27.7917	32.0945	29.9083	13.9424
tRNA-Cys-GCA-4-29	23.7242	1.4788	0	5.81138	1.82456	0	2.51078	1.31469	0	0	0	13.9199	0.746554	0	0.486067	0	3.31297	1.50827	0.8047	8.4905	7.39945	15.8803	6.4718	8.49297	0	0	2.85812	13.8206	0.387337	9.75723	1.37097	0	9.26389	12.2265	9.57064	2.1785
tRNA-Cys-GCA-1-1	29.199	1.97174	1.49442	8.71706	0	2.70126	1.88309	0.438229	2.15084	0	0	15.6599	1.11983	0	0.972134	0	1.65648	0.754136	3.2188	2.83017	2.46648	8.73416	1.76504	0	0	0	0	5.92312	0.871508	4.87862	4.11292	1.33507	6.94792	10.6982	10.767	2.1785
tRNA-Glu-TTC-1-2	31.024	2.9576	16.4387	61.0194	9.12282	1.35063	3.9754	13.1469	3.22627	33.9069	10.1994	49.2997	3.54613	7.2441	2.9164	4.69924	33.1297	3.77068	3.2188	45.2827	34.5308	61.1391	38.2425	40.9207	4.696	3.59439	14.2906	33.5644	2.80819	51.8353	4.11292	4.00521	27.7917	41.2643	28.7119	10.0211
tRNA-Arg-ACG-3-1	246.367	151.824	159.903	104.605	105.825	137.764	95.2005	107.366	92.4863	146.223	154.448	120.639	108.624	97.7954	106.935	138.628	129.206	120.662	126.338	135.848	96.1928	96.8698	98.2537	100.371	113.643	86.5222	102.892	110.565	112.909	94.5232	95.9682	104.135	97.2709	90.1702	72.9761	105.875
tRNA-Leu-TAA-2-1	82.1223	80.8412	97.1376	98.7934	104	109.401	66.1173	91.1516	90.3354	127.151	93.2514	96.8594	69.6162	97.7954	82.6314	89.2856	76.1983	62.5933	124.729	87.7351	93.7264	84.9595	81.7801	78.753	68.5616	82.9278	97.1762	45.4106	83.8585	78.0579	89.1134	64.0833	83.375	64.1889	64.6018	79.2973
tRNA-Trp-CCA-6-1	23.7242	0.985868	2.98885	2.90569	1.82456	1.35063	2.30155	2.19114	2.15084	2.11918	1.45705	11.0199	3.73277	1.81103	1.4582	4.69924	1.65648	4.52481	3.2188	5.66033	4.93297	7.14613	4.70677	6.1767	0.939201	0.513485	5.71625	7.8975	3.77654	10.9769	2.74195	1.33507	16.2118	0	8.37431	2.6142
tRNA-Glu-CTC-1-7	47.4484	30.5619	22.4164	72.6422	78.4562	68.8821	37.4525	74.9371	63.4499	59.337	59.7392	48.1397	43.1135	61.5749	35.4829	32.8947	53.0075	47.5106	65.9854	50.943	51.7961	62.7271	50.0094	56.3624	47.8992	44.6732	40.0137	7.8975	40.6704	55.4943	58.9519	54.7378	44.0035	59.604	58.6202	58.3837
tRNA-Ser-TGA-1-1	113.146	77.3906	103.115	101.699	127.719	81.0378	74.6958	94.6574	106.467	118.674	116.564	83.5195	74.4688	132.205	95.2691	84.5863	96.0761	101.054	101.392	104.716	83.8604	84.1655	82.9568	90.3343	118.339	102.44	128.616	124.386	101.966	82.9365	78.1456	121.491	69.4792	90.1702	102.884	101.082
tRNA-Phe-GAA-1-2	131.396	95.1362	118.06	98.7934	133.193	99.9466	79.5081	93.3427	93.5617	146.223	113.65	102.659	90.1464	105.039	105.963	98.6841	86.1372	99.5459	101.392	90.5653	115.925	84.1655	80.015	91.8785	83.5888	90.3734	82.8856	98.7187	80.5661	81.7168	100.081	68.0885	108.851	84.057	74.1725	122.432
tRNA-Asn-GTT-3-8	177.019	121.262	140.476	104.605	140.491	122.907	101.268	121.389	107.542	194.965	164.647	116.579	100.038	141.26	125.891	112.782	129.206	125.187	124.729	135.848	118.391	82.5775	94.1353	91.8785	108.008	105.264	105.751	148.078	96.0596	88.4249	101.452	106.806	120.431	122.265	90.9211	149.009
tRNA-Lys-TTT-5-1	65.6978	2.9576	0	0	0	1.35063	0.627695	1.31469	0	2.11918	1.45705	6.37996	2.05302	0	0	4.69924	31.4732	1.50827	0	2.83017	0	3.17606	2.35338	0	0	0.256742	8.57437	5.92312	0.484171	3.65896	1.37097	0	0	0	2.39266	2.1785
tRNA-Trp-CCA-2-1	129.571	82.32	104.61	63.9251	107.649	105.349	74.4865	97.2868	88.1846	141.985	104.908	91.6394	101.345	94.1733	94.7831	70.4886	99.389	106.333	93.3452	79.2447	73.9945	83.3715	77.0733	77.2088	66.6832	74.9688	85.7437	181.642	84.8268	69.5203	58.9519	93.4549	67.1632	70.3022	62.2092	84.5257
tRNA-Asp-GTC-2-1	111.321	125.698	127.026	139.473	169.684	129.66	103.151	117.007	124.749	158.938	118.021	104.399	105.264	115.906	119.086	124.53	112.641	129.711	180.253	104.716	96.1928	109.574	96.4887	110.409	115.522	120.669	134.332	171.771	125.885	103.061	126.13	149.528	99.5868	103.925	102.884	151.623
tRNA-Asp-GTC-1-8	122.271	73.4471	86.6766	72.6422	93.0527	81.0378	62.1419	86.7693	52.6957	84.7672	84.5091	69.0195	68.4963	90.5513	89.4363	93.9848	109.328	77.676	96.564	67.924	73.9945	79.4014	80.015	73.3484	88.2848	86.0087	77.1694	71.0775	76.5959	75.0087	61.6939	78.7691	69.4792	85.5853	96.9027	93.2397
tRNA-Ser-CGA-2-1	58.3981	62.6026	55.2937	40.6796	56.5615	55.3758	41.0094	67.9255	67.7516	59.337	65.5674	49.2997	54.4984	50.7087	37.4272	39.9435	39.7556	29.4113	41.0397	59.4335	64.1286	63.5211	62.3646	70.26	37.568	39.5383	34.2975	88.8468	57.8101	64.6417	54.839	42.7222	60.2153	62.6606	76.5651	56.2052
tRNA-Asp-GTC-1-9	56.5731	1.97174	1.49442	5.81138	1.82456	0	3.55694	1.31469	0	2.11918	0	5.79996	1.30647	0	3.40247	4.69924	4.96945	0	0.8047	0	2.46648	1.58803	3.53007	1.54418	0	0.256742	2.85812	5.92312	0.67784	1.82948	1.37097	1.33507	2.31597	0	1.19633	0.871399
tRNA-Val-CAC-2-3	104.022	72.9542	91.1599	78.4536	58.386	95.8947	73.6496	49.0816	69.9024	76.2905	74.3097	82.3595	92.3861	81.4961	88.4642	126.88	94.4196	101.808	89.3217	53.7732	78.9275	80.1955	60.5996	58.6787	87.3456	86.0087	91.46	140.181	74.4656	79.8873	72.6617	64.0833	48.6354	68.7739	69.3871	66.2263
tRNA-Lys-CTT-3-3	69.3477	82.32	89.6655	84.265	67.5088	116.154	90.8066	74.9371	83.8829	76.2905	81.595	76.5595	106.197	99.6064	89.4363	91.6352	87.7936	101.054	85.2982	96.2256	98.6593	104.016	110.021	86.4739	92.9808	89.8599	97.1762	53.3081	92.1862	64.0318	98.7102	96.125	90.3229	91.6985	96.9027	72.7618
tRNA-Ala-TGC-3-1	60.223	71.9683	79.2045	95.8877	65.6843	114.804	82.8558	67.9255	70.9778	84.7672	69.9386	64.3796	83.6141	85.1182	87.9781	101.034	69.5723	96.5294	86.9076	84.905	69.0615	82.5775	79.4267	82.6134	80.7712	81.3874	60.0206	39.4875	101.289	62.2024	91.8553	104.135	71.7952	82.5286	63.4055	71.019
tRNA-Thr-TGT-3-1	100.372	64.0814	92.6543	110.416	85.7545	64.8302	93.9451	89.8369	100.014	82.648	36.4263	87.5794	100.412	90.5513	108.879	110.432	104.358	83.7091	90.9311	76.4145	81.3939	78.6074	77.6616	77.2088	81.7104	96.7919	97.1762	31.59	81.7281	71.3498	86.3714	53.4028	55.5833	85.5853	87.3321	86.2685
tRNA-Pro-TGG-2-2	116.796	90.2069	104.61	90.0763	113.123	126.959	113.822	100.354	84.9583	122.912	120.935	100.339	111.61	132.205	127.836	89.2856	112.641	118.399	123.924	90.5653	76.461	100.84	102.372	81.8413	108.947	124.007	117.183	47.385	108.454	96.3527	128.872	125.497	106.535	82.5286	102.884	115.896
tRNA-Val-AAC-1-2	135.046	119.783	162.892	124.945	120.421	140.466	118.425	109.119	105.391	141.985	132.592	107.879	123.368	146.693	176.928	117.481	140.801	136.499	143.237	118.867	98.6593	92.8997	95.9004	87.2459	157.786	136.074	128.616	73.0518	136.246	95.133	135.727	165.549	113.483	96.2834	102.884	139.859
tRNA-Leu-AAG-1-1	98.5468	101.051	138.982	61.0194	58.386	74.2846	88.0866	73.1842	59.1482	101.721	80.138	94.5394	84.9205	101.417	122.489	117.481	127.549	97.2835	78.8606	70.7542	54.2626	78.6074	62.3646	69.4879	126.792	120.412	82.8856	49.3594	113.199	57.3237	85.0004	94.7899	69.4792	64.1889	81.3504	65.3549
tRNA-Glu-CTC-1-8	164.245	123.233	176.342	98.7934	102.176	151.271	126.167	112.187	119.372	169.534	134.049	122.379	103.584	179.292	153.111	126.88	127.549	156.106	142.432	152.829	152.922	109.574	114.139	111.181	129.61	131.452	140.048	155.976	141.184	130.503	148.065	112.146	104.219	122.265	101.688	108.053
tRNA-Leu-CAA-3-1	140.52	111.403	138.982	87.1706	114.947	149.92	113.613	132.783	116.146	135.627	136.963	127.019	114.223	130.394	97.2134	96.3344	107.671	146.302	119.9	135.848	120.858	118.308	106.491	106.548	120.218	110.656	97.1762	140.181	131.888	122.575	139.839	108.141	99.5868	111.567	123.222	122.867
tRNA-Trp-CCA-5-1	49.2734	22.182	49.316	98.7934	98.5264	85.0897	72.185	52.5875	69.9024	57.2179	59.7392	70.1795	65.5101	59.7638	26.2476	82.2367	62.9464	67.1181	82.8841	82.0748	76.461	68.2852	81.1917	82.6134	92.0416	30.8091	48.5881	116.488	45.1248	84.1561	47.9841	85.4444	74.1111	76.4154	84.9394	104.132
tRNA-Trp-CCA-1-1	14.5995	1.97174	2.98885	63.9251	49.2632	21.6101	14.6462	2.62937	4.30169	14.8343	2.91411	20.2999	3.35949	3.62205	6.80494	7.04886	6.62594	11.312	11.2658	31.1318	49.3297	73.0493	52.3628	70.26	2.8176	7.70227	8.57437	55.2825	5.71322	54.8844	9.59682	10.6806	71.7952	58.0757	39.4789	48.3626
tRNA-Pro-TGG-3-1	20.0743	1.97174	0	0	0	0	2.51078	0.438229	0	0	0	3.47998	1.86639	0	0.972134	0	1.65648	1.50827	2.4141	0	4.93297	1.58803	7.64849	1.54418	0	0	2.85812	7.8975	0.290503	4.26879	1.37097	1.33507	2.31597	3.05662	2.39266	3.0499
tRNA-Ile-AAT-1-1	67.5228	76.4048	85.1822	95.8877	78.4562	68.8821	91.4343	70.9931	95.7125	57.2179	85.9662	82.3595	85.6671	76.0631	81.6593	98.6841	79.5112	104.071	79.6653	67.924	88.7934	76.2254	80.015	73.3484	68.5616	89.6031	85.7437	49.3594	65.2663	82.3266	97.3392	76.099	81.059	74.8871	106.473	97.5967
tRNA-Ser-AGA-2-2	69.3477	86.2634	92.6543	84.265	93.0527	103.998	119.053	91.5898	109.693	82.648	100.537	71.3395	107.69	105.039	99.6437	82.2367	89.4501	96.5294	102.197	93.3955	73.9945	84.9595	116.492	93.4226	91.1024	106.805	65.7369	51.3337	103.032	101.841	101.452	85.4444	106.535	81.0003	87.3321	109.361
tRNA-Thr-AGT-1-2	56.5731	66.0531	74.7212	58.1138	54.7369	70.2328	82.0189	58.7227	75.2795	59.337	61.1963	56.8396	82.121	54.3308	66.1051	56.3909	61.2899	62.5933	40.235	65.0938	46.8632	70.6673	77.6616	59.4508	75.136	74.9688	60.0206	51.3337	79.2104	94.5232	79.5165	62.7483	78.7431	51.9625	75.3688	64.9192
tRNA-Pro-CGG-1-2	114.971	104.995	110.587	66.8308	102.176	133.712	99.3851	105.175	115.07	74.1713	120.935	91.6394	89.7731	115.906	131.238	140.977	109.328	116.137	116.682	70.7542	83.8604	60.3451	87.0752	72.5763	108.947	126.831	131.474	90.8212	109.616	76.2284	148.065	121.491	62.5313	73.3588	81.3504	115.46
tRNA-Asp-GTC-1-10	104.022	121.755	127.026	110.416	102.176	164.777	121.982	128.839	118.296	97.4823	126.764	114.839	102.651	144.882	155.541	155.075	132.519	162.893	160.94	99.0558	103.592	110.368	125.906	130.483	136.184	147.884	174.346	120.437	129.952	128.674	146.694	145.523	134.326	105.453	124.418	140.295
tRNA-Gly-TCC-1-7	93.0719	107.46	113.576	133.662	102.176	155.322	112.985	122.266	113.995	122.912	106.365	106.139	96.3055	85.1182	133.182	136.278	119.267	132.728	119.9	84.905	83.8604	85.7536	102.961	102.688	99.5553	124.263	134.332	108.591	107.873	106.11	123.388	125.497	106.535	100.868	95.7064	128.096
tRNA-Trp-CCA-3-1	76.6475	80.8412	67.2491	72.6422	98.5264	68.8821	61.0957	83.2635	65.6007	82.648	56.8251	74.2395	55.9916	76.0631	97.2134	103.383	82.8242	85.2173	65.9854	62.2637	76.461	65.9032	64.718	66.3996	75.136	81.6441	62.8787	41.4619	74.3687	74.3989	79.5165	64.0833	55.5833	51.9625	69.3871	84.9614
tRNA-Ile-AAT-1-2	65.6978	61.1238	62.7658	75.5479	41.965	76.9859	72.3942	61.352	68.827	48.7411	62.6533	69.5995	75.5886	74.252	65.6191	77.5375	76.1983	74.6594	61.9619	104.716	71.528	72.2553	72.9549	67.1717	64.8048	83.1846	62.8787	59.2312	61.8771	71.9596	76.7746	88.1146	69.4792	55.0191	94.5101	57.948
tRNA-Thr-AGT-1-3	102.197	111.403	116.565	92.982	82.1053	117.505	124.284	103.86	116.146	95.3631	104.908	110.199	105.637	92.3623	116.17	133.928	110.984	118.399	124.729	127.357	98.6593	82.5775	88.2519	108.092	105.19	127.344	125.757	69.1031	104.097	89.6446	128.872	153.533	101.903	116.151	107.67	97.161
tRNA-Ser-GCT-4-1	125.921	136.543	147.948	110.416	114.947	158.024	139.139	131.469	134.428	141.985	141.334	122.959	115.156	137.638	153.111	143.327	127.549	138.761	149.674	124.527	103.592	100.046	107.079	111.953	126.792	143.006	134.332	92.7956	133.631	95.133	200.162	169.554	118.115	126.85	116.044	119.817
tRNA-Trp-CCA-3-2	60.223	82.8129	97.1376	72.6422	62.0351	110.752	86.4127	71.4313	70.9778	86.8864	85.9662	69.5995	67.3765	74.252	88.4642	91.6352	96.0761	96.5294	91.7358	104.716	88.7934	74.6374	82.9568	74.8925	84.528	87.2924	94.3181	69.1031	73.4004	78.6677	93.2263	89.4496	81.059	45.8492	81.3504	84.5257
tRNA-Thr-AGT-3-1	25.5492	48.8005	41.8439	52.3024	34.6667	35.1164	65.908	42.9464	43.0169	33.9069	42.2546	42.3397	47.7795	27.1654	33.0526	30.5451	28.1602	34.6902	48.282	76.4145	46.8632	60.3451	48.8327	46.3253	31.9328	32.6063	42.8719	53.3081	34.1825	51.8353	37.0163	42.7222	50.9514	51.9625	68.1908	52.2839
tRNA-Ser-CGA-1-1	32.8489	41.4064	55.2937	55.2081	45.6141	63.4796	74.2773	51.2728	49.4694	50.8603	58.2822	54.5196	46.0997	36.2205	42.7739	56.3909	34.7862	42.2316	78.8606	79.2447	76.461	60.3451	52.9511	54.0462	32.872	45.4434	51.4462	78.975	39.7989	51.8353	58.9519	50.7326	62.5313	45.8492	59.8165	54.4624
tRNA-Gly-GCC-2-6	49.2734	45.8429	62.7658	43.5853	63.8597	68.8821	65.0711	51.711	61.299	80.5288	78.6809	77.7195	66.2567	61.5749	64.6469	56.3909	59.6334	79.9384	61.1572	84.905	91.2599	83.3715	75.8966	62.5391	75.136	77.0227	82.8856	128.334	70.108	82.3266	74.0326	61.4132	83.375	79.472	55.0312	60.1265
tRNA-Arg-TCT-2-1	63.8729	69.0107	73.2268	61.0194	65.6843	85.0897	87.0404	59.1609	66.6762	74.1713	84.5091	86.9994	76.3352	43.4646	78.7429	70.4886	86.1372	70.8888	63.5713	50.943	46.8632	73.8433	65.8947	87.2459	46.96	78.8199	97.1762	45.4106	56.648	93.3035	87.7424	80.1042	48.6354	93.2268	76.5651	71.019
tRNA-Leu-TAG-1-1	87.5971	98.0938	110.587	101.699	107.649	120.206	120.099	88.5222	106.467	127.151	103.451	112.519	103.211	92.3623	105.477	129.229	101.046	103.317	92.5405	121.697	110.992	104.016	119.434	91.1064	97.6769	84.9818	88.6019	65.1543	85.1173	101.231	137.097	146.858	71.7952	116.151	99.2954	111.975
tRNA-Gln-CTG-2-2	71.1727	81.3341	68.7435	66.8308	83.9299	67.5315	83.6927	61.352	69.9024	78.4096	68.4815	89.3194	54.8717	74.252	88.9503	108.083	77.8547	65.6098	70.8136	70.7542	64.1286	70.6673	88.8402	65.6275	77.9536	78.0497	77.1694	61.2056	80.3724	75.0087	109.678	102.8	71.7952	82.5286	77.7615	94.1111
tRNA-Lys-TTT-1-3	45.6235	69.9966	82.1934	69.7365	105.825	95.8947	92.6897	84.5782	75.2795	91.1247	91.7944	92.7994	69.8028	92.3623	101.588	77.5375	92.7631	74.6594	94.1499	96.2256	83.8604	80.9895	78.25	80.2972	77.0144	93.9677	94.3181	78.975	91.7021	76.2284	117.904	100.13	78.7431	79.472	87.3321	104.568
tRNA-Lys-CTT-9-1	18.2494	2.46467	1.49442	5.81138	0	4.05189	1.88309	1.75292	0	0	0	8.69994	1.67975	1.81103	1.4582	4.69924	3.31297	3.01654	2.4141	0	2.46648	2.38204	1.17669	0.772088	0	0	0	11.8462	0.67784	2.43931	1.37097	1.33507	2.31597	1.52831	0	2.6142
tRNA-Thr-CGT-2-1	65.6978	45.8429	65.7547	75.5479	32.8421	48.6227	65.2803	73.1842	81.7321	55.0987	75.7668	53.3596	72.4157	50.7087	41.8018	32.8947	43.0686	74.6594	92.5405	53.7732	78.9275	42.8768	47.656	60.2229	44.1424	49.2946	71.4531	108.591	48.4171	60.9827	78.1456	86.7795	74.1111	55.0191	59.8165	37.9058
tRNA-Gln-TTG-5-1	5.47482	2.9576	1.49442	0	1.82456	2.70126	2.09232	2.62937	3.22627	0	1.45705	11.0199	3.17285	1.81103	2.43034	2.34962	1.65648	0	0	5.66033	7.39945	4.76409	8.82519	4.63253	2.8176	1.54045	2.85812	19.7437	1.74302	3.65896	2.74195	0	0	3.05662	3.58899	2.1785
tRNA-Gln-TTG-1-1	105.847	118.304	98.632	101.699	125.895	125.609	91.4343	125.772	110.768	144.104	129.678	110.779	102.278	130.394	120.059	112.782	101.046	113.874	119.9	118.867	120.858	91.3117	101.195	86.4739	123.974	109.629	134.332	163.873	96.6406	96.3527	108.307	113.481	115.799	90.1702	84.9394	102.389
tRNA-Asn-GTT-3-9	104.022	34.9983	106.104	72.6422	65.6843	62.129	75.5327	42.07	83.8829	84.7672	96.1655	67.2796	69.6162	74.252	71.9379	68.139	94.4196	41.4775	103.806	87.7351	73.9945	80.9895	90.0169	84.1576	61.9872	66.2396	54.3044	73.0518	63.4264	81.107	65.8068	62.7483	85.691	87.1136	65.7982	77.5545
tRNA-Cys-GCA-5-1	23.7242	1.4788	5.9777	2.90569	3.64913	1.35063	10.2524	3.0676	1.07542	10.5959	2.91411	61.4796	5.03924	0	2.43034	0	1.65648	2.26241	0.8047	2.83017	0	4.76409	4.11842	6.1767	0	1.54045	2.85812	53.3081	2.22719	9.14741	1.37097	0	4.63195	1.52831	9.57064	2.1785
tRNA-Cys-GCA-3-2	31.024	11.3375	23.9108	46.491	25.5439	25.662	30.1294	15.7762	19.3576	27.5493	23.3129	32.4798	37.3277	28.9764	18.9566	23.4962	24.8473	13.5744	22.5316	39.6223	61.6621	55.581	42.9492	68.7158	28.176	23.3636	17.1487	25.6669	19.6574	41.4682	28.7905	33.3767	55.5833	39.736	52.6385	24.3992
tRNA-Cys-GCA-2-1	29.199	17.2527	22.4164	52.3024	51.0878	33.7657	52.0987	33.3054	38.7152	44.5028	67.0245	55.6796	69.0563	54.3308	58.328	32.8947	23.1908	46.7564	33.7974	39.6223	66.595	63.5211	58.8346	57.1345	56.352	51.0918	42.8719	23.6925	40.9609	74.3989	45.2422	32.0417	78.7431	42.7926	59.8165	60.5622
tRNA-Cys-GCA-3-3	98.5468	94.6433	113.576	66.8308	78.4562	145.868	116.542	99.0397	117.221	141.985	104.908	89.8994	100.038	141.26	119.572	136.278	114.297	87.4797	115.072	87.7351	91.2599	100.84	99.4304	91.1064	130.549	109.372	114.325	144.129	100.998	90.2544	116.533	137.512	99.5868	84.057	96.9027	88.0113
tRNA-Cys-GCA-3-4	91.247	90.2069	98.632	84.265	96.7018	122.907	102.733	78.8812	92.4863	108.078	107.822	89.8994	74.0955	153.937	123.461	124.53	94.4196	85.9715	107.025	96.2256	101.126	82.5775	108.256	105.004	104.251	118.615	125.757	140.181	101.676	103.061	102.823	114.816	62.5313	103.925	96.9027	114.153
tRNA-Arg-CCG-3-1	91.247	83.7988	109.093	78.4536	82.1053	79.6872	58.3757	78.8812	90.3354	99.6014	91.7944	81.1995	69.0563	52.5197	78.7429	101.034	97.7325	99.5459	72.423	62.2637	66.595	62.7271	81.1917	81.0692	81.7104	83.698	71.4531	142.155	60.2309	71.3498	79.5165	92.1198	48.6354	76.4154	77.7615	84.5257
tRNA-Arg-CCT-1-1	71.1727	87.7422	83.6878	78.4536	47.4386	86.4403	89.5512	62.2285	56.9974	63.5754	74.3097	85.8394	83.9873	54.3308	81.1732	65.7894	72.8853	85.9715	113.463	73.5843	64.1286	53.199	60.5996	63.3112	77.0144	78.8199	88.6019	57.2568	70.3017	73.1792	76.7746	53.4028	48.6354	68.7739	70.5835	62.7407
tRNA-Arg-CCT-2-1	114.971	120.769	133.004	90.0763	105.825	135.063	105.453	72.746	77.4304	84.7672	80.138	106.139	106.197	72.441	116.17	136.278	109.328	118.399	135.994	79.2447	91.2599	72.2553	80.015	84.1576	98.6161	101.927	111.467	77.0006	93.5419	95.133	90.4843	81.4392	69.4792	91.6985	104.081	84.9614
tRNA-Arg-TCG-2-1	51.0983	72.9542	62.7658	72.6422	51.0878	70.2328	65.4896	50.8345	49.4694	38.1452	53.911	52.7797	72.2291	59.7638	55.8977	72.8382	56.3205	64.8557	75.6418	33.962	66.595	57.963	52.9511	51.7299	63.8656	54.6861	54.3044	65.1543	54.6145	65.2515	67.1778	42.7222	48.6354	45.8492	61.0128	54.4624
tRNA-Lys-CTT-2-2	87.5971	79.8553	98.632	98.7934	91.2282	122.907	42.8925	64.4196	59.1482	55.0987	75.7668	72.4995	73.5356	108.662	89.9224	70.4886	99.389	72.397	86.9076	67.924	86.3269	79.4014	81.1917	65.6275	103.312	100.386	111.467	63.18	92.4767	78.0579	82.2585	90.7847	69.4792	71.8305	81.3504	82.3472
tRNA-Ile-AAT-1-3	56.5731	58.6591	53.7993	52.3024	31.0176	83.739	68.0003	102.107	98.9388	110.197	110.736	86.4194	62.3373	18.1103	23.3312	63.4398	81.1677	92.0046	86.9076	31.1318	44.3967	38.9067	31.7707	27.0231	17.8448	32.0928	45.73	49.3594	24.5959	41.4682	90.4843	41.3872	39.3715	22.9246	31.1046	27.0134
tRNA-Glu-CTC-1-9	78.4724	75.9118	68.7435	66.8308	89.4036	113.453	83.6927	107.366	103.24	112.317	134.049	84.6794	97.4253	61.5749	81.6593	77.5375	106.015	116.137	107.83	101.886	78.9275	89.7236	85.3101	86.4739	68.5616	83.1846	77.1694	102.667	69.1397	74.3989	94.5973	88.1146	101.903	85.5853	98.0991	82.7829
tRNA-Phe-GAA-1-3	85.7722	71.4754	86.6766	58.1138	113.123	101.297	65.0711	93.3427	73.1287	114.436	134.049	84.0994	86.6003	70.63	86.0339	84.5863	119.267	112.366	90.1264	93.3955	83.8604	78.6074	94.7237	99.5994	73.2576	79.8469	82.8856	122.411	83.4711	77.448	87.7424	90.7847	88.007	93.2268	76.5651	80.1687
tRNA-Met-CAT-2-1	62.048	80.3482	121.048	95.8877	122.246	114.804	87.0404	85.0164	91.4109	65.6946	80.138	72.4995	86.4136	105.039	100.616	86.936	71.2288	79.9384	78.0559	93.3955	118.391	104.81	101.784	102.688	110.826	106.548	102.892	55.2825	111.263	92.6937	100.081	110.811	94.9549	76.4154	89.7248	110.232
tRNA-Lys-TTT-1-4	62.048	73.4471	79.2045	63.9251	93.0527	89.1416	82.4373	101.669	88.1846	67.8137	100.537	57.9996	83.4274	81.4961	92.8388	63.4398	74.5418	85.2173	73.2277	73.5843	81.3939	72.2553	65.3064	60.995	93.9201	90.3734	60.0206	73.0518	82.987	61.5925	90.4843	82.7743	76.4271	55.0191	59.8165	77.9902
tRNA-Met-CAT-2-2	41.9736	91.6857	89.6655	63.9251	80.2808	66.1809	74.4865	88.5222	81.7321	65.6946	88.8803	71.3395	85.4804	95.9843	85.0617	101.034	86.1372	85.2173	67.5948	62.2637	66.595	84.1655	90.6052	65.6275	87.3456	89.0896	74.3112	51.3337	80.5661	76.8382	64.4358	72.0937	83.375	77.9437	71.7798	61.4336
tRNA-Leu-AAG-1-2	40.1487	73.9401	76.2157	40.6796	47.4386	55.3758	60.468	76.69	84.9583	42.3836	65.5674	45.2397	72.2291	67.0079	64.6469	54.0413	59.6334	49.0188	39.4303	25.4715	44.3967	58.7571	50.0094	50.9578	62.9264	61.6182	57.1625	61.2056	70.108	48.1763	57.5809	60.0781	55.5833	53.4908	38.2826	40.9557
tRNA-Leu-AAG-3-1	21.8993	30.069	22.4164	8.71706	10.9474	21.6101	23.2247	33.7436	46.2431	8.47672	16.0276	23.7798	40.3139	19.9213	18.9566	14.0977	11.5954	11.312	13.6799	22.6413	9.86593	15.8803	11.1786	19.3022	16.9056	23.3636	14.2906	27.6412	29.4376	18.9046	23.3066	18.691	18.5278	10.6982	20.3376	12.6353
tRNA-Gln-CTG-2-3	58.3981	58.6591	49.316	78.4536	82.1053	63.4796	64.0249	54.3404	60.2236	46.622	59.7392	53.3596	60.4709	47.0867	42.2878	56.3909	48.038	67.1181	54.7196	42.4525	49.3297	61.1391	56.4812	70.26	40.3856	30.2956	65.7369	43.4362	50.257	47.5665	76.7746	80.1042	69.4792	58.0757	63.4055	57.0766
tRNA-Leu-CAA-1-1	54.7482	76.4048	40.3495	81.3593	80.2808	93.1935	104.197	87.6458	75.2795	97.4823	64.1104	71.3395	67.3765	52.5197	37.4272	54.0413	53.0075	67.8722	53.1102	45.2827	64.1286	77.8134	58.8346	79.5251	44.1424	35.1737	45.73	71.0775	52.581	68.3006	109.678	80.1042	69.4792	53.4908	78.9578	49.234
tRNA-Leu-CAA-2-1	69.3477	92.1786	86.6766	104.605	151.439	116.154	81.8096	125.772	90.3354	101.721	169.018	75.9795	108.064	67.0079	95.2691	98.6841	87.7936	106.333	99.7828	87.7351	93.7264	95.2817	92.9586	82.6134	77.0144	78.3065	100.034	157.95	87.4413	85.9856	94.5973	129.502	92.6389	99.34	86.1358	119.382
tRNA-Arg-CCG-1-1	18.2494	25.6326	11.9554	52.3024	63.8597	14.8569	20.5047	16.2145	25.8101	16.9534	10.1994	13.3399	48.3394	9.05513	1.4582	7.04886	13.2519	4.52481	12.8752	42.4525	32.0643	48.4349	47.656	42.4648	4.696	2.31068	11.4325	31.59	15.1061	37.1994	19.1936	36.0469	50.9514	39.736	52.6385	48.7983
tRNA-Ala-AGC-2-1	40.1487	34.9983	22.4164	78.4536	109.474	28.3632	34.5233	23.2261	29.0364	29.6685	11.6564	46.9797	67.3765	36.2205	9.72134	18.797	24.8473	8.29549	41.0397	73.5843	56.7291	79.4014	81.1917	69.4879	14.088	12.8371	45.73	41.4619	35.9255	70.1301	49.3551	41.3872	60.2153	73.3588	72.9761	67.0977
tRNA-Ala-AGC-2-2	41.9736	28.5902	17.9331	61.0194	131.369	16.2076	31.8032	70.1166	87.1092	52.9795	67.0245	54.5196	101.345	28.9764	16.0402	23.4962	19.8778	10.5579	22.5316	84.905	64.1286	87.3416	86.4868	85.7018	26.2976	11.2967	20.0069	53.3081	50.6443	62.8122	32.9034	38.717	74.1111	91.6985	72.9761	106.746
tRNA-Ala-TGC-1-1	9.1247	1.97174	2.98885	8.71706	7.29825	5.40252	10.6708	3.50583	8.60337	0	1.45705	9.27994	6.34571	0	1.94427	4.69924	6.62594	3.01654	0.8047	5.66033	0	38.1127	18.2387	13.8976	0.939201	0.256742	0	23.6925	2.80819	14.026	4.11292	2.67014	11.5799	22.9246	25.1229	5.22839
tRNA-Ala-AGC-1-1	14.5995	5.91521	1.49442	8.71706	7.29825	0	5.44003	1.75292	1.07542	2.11918	2.91411	12.7599	3.35949	0	0.486067	4.69924	11.5954	1.50827	2.4141	11.3207	4.93297	26.9965	15.297	27.7952	1.8784	1.02697	0	13.8206	3.0987	9.14741	2.74195	0	20.8438	10.6982	27.5156	2.1785
tRNA-Thr-AGT-6-1	5.47482	1.97174	0	14.5284	0	4.05189	4.39387	0.438229	0	0	0	11.0199	2.4263	1.81103	0.972134	2.34962	4.96945	1.50827	1.6094	5.66033	0	12.7042	5.88346	14.6697	0	0.256742	0	13.8206	2.32402	13.4162	1.37097	0	6.94792	3.05662	4.78532	2.6142
tRNA-Ala-CGC-1-1	21.8993	4.92934	5.9777	52.3024	34.6667	2.70126	11.717	4.38229	3.22627	2.11918	5.82822	10.4399	5.59916	0	0.486067	2.34962	3.31297	0.754136	7.2423	33.962	51.7961	64.3152	48.8327	57.1345	4.696	0.513485	8.57437	13.8206	4.74488	53.055	13.7097	14.6858	25.4757	42.7926	49.0495	44.877
tRNA-Ala-AGC-3-1	7.29976	6.40814	2.98885	78.4536	60.2106	4.05189	8.99697	5.69697	5.37711	0	4.37116	8.11995	9.7052	0	0.972134	0	3.31297	3.77068	4.8282	62.2637	56.7291	81.7835	71.7782	69.4879	2.8176	1.02697	0	11.8462	5.13222	60.3729	17.8227	10.6806	78.7431	62.6606	76.5651	54.8981
tRNA-Thr-CGT-4-1	7.29976	1.4788	0	40.6796	9.12282	1.35063	4.39387	2.19114	0	2.11918	1.45705	16.8199	35.2747	0	0	0	6.62594	3.01654	0.8047	28.3017	29.5978	50.0229	50.0094	33.9719	0.939201	0.513485	2.85812	11.8462	5.51955	30.4914	13.7097	2.67014	34.7396	36.6794	40.6752	7.84259
tRNA-Gln-TTG-2-1	7.29976	2.46467	1.49442	8.71706	1.82456	0	4.81233	7.88812	3.22627	14.8343	72.8527	17.3999	5.03924	0	0.486067	0	3.31297	2.26241	1.6094	2.83017	2.46648	8.73416	6.4718	4.63253	0	0.513485	2.85812	15.795	1.93669	7.92775	4.11292	1.33507	13.8958	4.58492	5.98165	3.0499
tRNA-Thr-TGT-1-1	14.5995	14.788	5.9777	72.6422	74.8071	21.6101	33.8956	21.9114	23.6593	4.23836	16.0276	31.3198	1.49311	9.05513	4.3746	16.4473	19.8778	6.78722	13.6799	79.2447	56.7291	84.1655	89.4286	57.9066	3.7568	7.70227	14.2906	13.8206	9.58659	59.763	39.7583	25.3663	67.1632	70.3022	64.6018	80.1687
tRNA-Arg-TCG-3-1	27.3741	19.7174	8.96655	55.2081	74.8071	48.6227	42.6833	42.5082	50.5448	25.4302	53.911	35.9598	3.54613	12.6772	10.2074	44.6428	38.0991	18.8534	41.8444	36.7922	93.7264	55.581	58.2462	71.8042	13.1488	12.5804	11.4325	47.385	20.9162	50.0058	57.5809	46.7274	57.8993	56.5474	65.7982	74.0689
tRNA-Thr-CGT-3-1	12.7746	0.492934	1.49442	17.4341	29.193	0	12.5539	2.62937	3.22627	2.11918	7.28527	6.37996	3.17285	1.81103	0.972134	0	1.65648	1.50827	1.6094	28.3017	17.2654	57.169	37.0658	43.2369	0	1.7972	2.85812	15.795	3.87337	37.8093	13.7097	2.67014	27.7917	32.0945	53.8349	18.7351
tRNA-Met-CAT-3-1	21.8993	20.2103	4.48327	37.7739	25.5439	10.805	41.0094	53.9021	69.9024	48.7411	65.5674	27.8398	84.9205	9.05513	5.8328	14.0977	13.2519	41.4775	37.0162	62.2637	51.7961	64.3152	60.5996	77.9809	10.3312	6.41856	22.865	25.6669	9.00559	56.1041	57.5809	42.7222	41.6875	33.6228	59.8165	29.1919
tRNA-Ser-GCT-5-1	10.9496	1.4788	4.48327	2.90569	0	0	2.51078	0.876458	0	4.23836	0	8.69994	0.746554	0	1.4582	0	23.1908	0.754136	1.6094	0	0	7.14613	1.17669	2.31626	0	0.256742	0	7.8975	0.387337	3.65896	1.37097	1.33507	4.63195	9.16985	2.39266	1.3071
tRNA-Gly-GCC-2-7	47.4484	85.2776	68.7435	69.7365	135.018	83.739	85.1574	84.5782	88.1846	99.6014	104.908	85.2594	82.4942	119.528	107.907	68.139	87.7936	101.054	84.4935	65.0938	133.19	86.5476	88.8402	81.8413	93.9201	89.6031	122.899	33.5644	100.611	79.2775	97.3392	60.0781	94.9549	99.34	74.1725	104.568
tRNA-iMet-CAT-1-2	52.9233	78.3765	67.2491	49.3967	122.246	64.8302	76.9973	75.8136	80.6566	93.2439	85.9662	79.4595	90.5197	95.9843	107.907	77.5375	69.5723	95.7752	65.1807	59.4335	106.059	88.1356	82.9568	84.1576	93.9201	87.2924	105.751	25.6669	104.581	93.3035	86.3714	45.3924	74.1111	85.5853	84.9394	80.1687
tRNA-Leu-TAA-3-1	7.29976	0.492934	0	5.81138	0	0	1.25539	0.438229	2.15084	0	0	4.63997	2.23966	0	0.486067	2.34962	1.65648	0	0	2.83017	4.93297	3.97007	3.53007	3.08835	0	0.513485	0	1.97437	1.16201	6.7081	0	0	4.63195	1.52831	2.39266	3.0499
tRNA-Ile-AAT-1-4	5.47482	18.7315	19.4275	29.0569	32.8421	13.5063	24.2709	10.0793	19.3576	2.11918	7.28527	20.8799	24.6363	7.2441	8.74921	21.1466	3.31297	4.52481	8.8517	11.3207	32.0643	30.1725	28.8289	23.1626	9.39201	10.013	14.2906	21.7181	14.2346	28.052	17.8227	16.0208	20.8438	32.0945	32.3009	45.7484
tRNA-Thr-AGT-4-1	14.5995	18.7315	13.4498	34.8683	36.4913	12.1557	37.034	11.8322	9.6788	8.47672	4.37116	19.1399	26.6893	3.62205	3.88854	9.39848	9.9389	4.52481	9.6564	62.2637	41.9302	50.8169	50.0094	60.2229	4.696	4.36462	11.4325	13.8206	15.0093	46.9567	24.6775	6.67535	39.3715	53.4908	78.9578	33.9845
tRNA-Ile-AAT-1-5	23.7242	25.6326	19.4275	31.9626	3.64913	2.70126	28.4555	6.57343	13.9805	2.11918	0	19.1399	35.4613	12.6772	2.9164	14.0977	19.8778	2.26241	7.2423	31.1318	32.0643	41.2887	35.3007	44.009	7.5136	6.16182	5.71625	25.6669	12.2011	35.37	13.7097	2.67014	32.4236	35.1511	37.0862	4.35699
tRNA-Phe-GAA-3-1	27.3741	36.4771	13.4498	69.7365	1.82456	6.75315	36.1971	6.57343	17.2067	14.8343	1.45705	17.3999	52.2588	7.2441	4.3746	25.8458	21.5343	2.26241	17.7034	39.6223	34.5308	56.375	50.0094	71.8042	8.4528	9.49947	14.2906	17.7694	17.1397	50.6156	37.0163	8.01042	60.2153	55.0191	45.4605	6.53549
tRNA-Ile-TAT-2-1	21.8993	5.42227	7.47212	75.5479	3.64913	5.40252	11.0893	3.0676	3.22627	2.11918	1.45705	13.3399	2.05302	0	0.486067	2.34962	1.65648	2.26241	2.4141	48.1128	51.7961	69.8733	88.8402	65.6275	0	0.770227	5.71625	17.7694	4.74488	65.8613	2.74195	2.67014	62.5313	90.1702	71.7798	9.58539
tRNA-iMet-CAT-3-1	16.4245	0.985868	2.98885	26.1512	0	2.70126	1.46462	0.876458	2.15084	0	1.45705	6.37996	1.49311	0	0	2.34962	0	0.754136	2.4141	2.83017	4.93297	39.7007	12.9436	28.5673	0	0.256742	0	15.795	1.45251	18.9046	2.74195	0	25.4757	9.16985	25.1229	1.3071
tRNA-Lys-TTT-2-2	3.64988	2.9576	2.98885	20.3398	0	0	3.34771	1.31469	1.07542	0	1.45705	6.37996	2.05302	0	0.486067	2.34962	1.65648	0	2.4141	5.66033	12.3324	23.8204	7.06015	20.0743	0	0.256742	0	7.8975	1.35568	8.53758	1.37097	1.33507	11.5799	10.6982	16.7486	1.3071
tRNA-Asp-GTC-1-11	16.4245	9.85868	13.4498	23.2455	0	1.35063	8.36927	1.75292	2.15084	0	1.45705	12.7599	4.10605	0	2.43034	18.797	3.31297	0.754136	0.8047	5.66033	14.7989	26.2025	15.8853	16.9859	1.8784	3.33765	8.57437	43.4362	6.58473	11.5867	0	1.33507	23.1597	24.4529	20.3376	2.1785
tRNA-Leu-CAA-4-1	36.4988	10.3516	5.9777	17.4341	0	1.35063	1.67385	3.94406	0	0	2.91411	27.2598	5.41252	1.81103	10.2074	25.8458	19.8778	1.50827	8.047	8.4905	2.46648	23.8204	5.29511	12.3534	5.6352	10.013	14.2906	35.5387	6.39106	10.3671	5.4839	0	18.5278	9.16985	13.1596	4.35699
tRNA-Arg-TCT-5-1	14.5995	11.8304	10.461	14.5284	3.64913	1.35063	11.9262	5.69697	5.37711	8.47672	5.82822	9.85994	5.78579	18.1103	12.6377	4.69924	6.62594	0.754136	4.0235	11.3207	14.7989	11.9102	11.7669	12.3534	14.088	7.95902	11.4325	9.87187	23.0466	9.14741	6.85487	1.33507	11.5799	9.16985	9.57064	2.1785
tRNA-Ser-AGA-2-3	29.199	38.4488	26.8996	31.9626	3.64913	8.10378	45.1941	17.9674	22.5839	10.5959	10.1994	27.2598	45.1665	48.8977	24.3034	28.1954	19.8778	3.77068	10.4611	11.3207	27.1313	28.5845	21.1804	35.516	33.8112	25.6742	22.865	51.3337	51.6127	16.4653	2.74195	5.34028	13.8958	18.3397	13.1596	7.84259
tRNA-Gln-CTG-1-1	23.7242	16.2668	5.9777	5.81138	1.82456	0	19.0401	7.01166	8.60337	4.23836	2.91411	15.0799	17.1707	9.05513	7.29101	14.0977	9.9389	3.77068	3.2188	5.66033	7.39945	11.1162	2.35338	8.49297	9.39201	9.49947	8.57437	17.7694	17.1397	7.31792	6.85487	1.33507	20.8438	7.64154	4.78532	1.3071
tRNA-Ser-TGA-2-1	10.9496	3.45054	1.49442	8.71706	7.29825	5.40252	5.85849	4.82052	1.07542	2.11918	0	12.7599	5.41252	1.81103	0.486067	4.69924	6.62594	1.50827	1.6094	8.4905	2.46648	13.4982	8.82519	7.72088	1.8784	2.05394	0	47.385	4.84171	8.53758	1.37097	0	16.2118	6.11323	7.17798	3.0499
tRNA-Ser-AGA-2-4	10.9496	7.39401	2.98885	5.81138	0	0	3.55694	2.19114	2.15084	2.11918	2.91411	13.9199	3.35949	0	1.4582	2.34962	3.31297	1.50827	4.0235	2.83017	0	3.97007	2.94173	4.63253	1.8784	1.28371	0	7.8975	4.35754	3.04914	0	0	2.31597	6.11323	4.78532	2.6142
tRNA-iMet-CAT-1-3	5.47482	0.492934	1.49442	11.6228	0	0	4.81233	0	1.07542	0	2.91411	8.69994	0.373277	0	0	2.34962	0	0.754136	1.6094	8.4905	2.46648	5.5581	2.35338	1.54418	0	0.256742	0	5.92312	1.35568	4.26879	0	1.33507	6.94792	1.52831	3.58899	0.435699
tRNA-Gln-CTG-2-4	12.7746	6.40814	0	11.6228	5.47369	1.35063	14.437	3.0676	6.45253	2.11918	2.91411	9.27994	5.03924	3.62205	3.88854	2.34962	8.28242	1.50827	4.0235	25.4715	17.2654	24.6144	29.4173	25.4789	0.939201	4.36462	2.85812	55.2825	4.93855	15.8555	5.4839	1.33507	16.2118	24.4529	23.9266	4.35699
tRNA-Asp-GTC-1-12	12.7746	12.3233	11.9554	23.2455	1.82456	5.40252	6.48619	3.50583	7.52795	2.11918	2.91411	18.5599	11.0117	9.05513	13.6099	21.1466	14.9084	2.26241	2.4141	5.66033	4.93297	17.4683	7.64849	17.758	8.4528	13.8641	17.1487	17.7694	17.9143	10.9769	2.74195	5.34028	9.26389	16.8114	11.9633	4.35699
tRNA-Ser-AGA-1-1	31.024	23.6608	13.4498	8.71706	5.47369	4.05189	24.4801	4.82052	4.30169	0	10.1994	38.8597	16.2376	28.9764	32.0804	21.1466	28.1602	4.52481	4.0235	11.3207	9.86593	29.3785	14.7086	16.2138	25.3584	26.4445	14.2906	80.9493	38.2495	14.6358	5.4839	6.67535	20.8438	15.2831	22.7303	3.92129
tRNA-Asp-GTC-1-13	58.3981	57.6733	46.3272	37.7739	29.193	32.4151	56.9111	79.3194	75.2795	44.5028	30.5981	67.8596	56.3648	47.0867	57.842	79.8871	49.6945	27.903	38.6256	62.2637	54.2626	53.199	55.8928	58.6787	68.5616	60.5912	48.5881	75.0262	78.7263	39.0289	35.6453	22.6962	46.3195	55.0191	51.4422	30.499
tRNA-Ser-AGA-2-5	43.7986	52.7439	35.8662	46.491	38.3158	37.8176	48.751	67.9255	74.2041	46.622	40.7975	57.4196	58.9778	67.0079	56.3838	63.4398	41.4121	28.6572	28.9692	53.7732	39.4637	65.1092	53.5395	64.0833	60.1088	62.6452	57.1625	69.1031	75.4339	48.7862	42.5002	18.691	32.4236	61.1323	57.4238	44.877
tRNA-Lys-TTT-3-1	12.7746	1.97174	0	8.71706	3.64913	1.35063	3.76617	3.0676	1.07542	2.11918	2.91411	10.4399	3.91941	0	1.4582	2.34962	0	3.01654	0.8047	2.83017	2.46648	7.94014	8.23684	3.08835	0.939201	1.54045	0	17.7694	1.93669	8.53758	1.37097	2.67014	9.26389	4.58492	9.57064	1.7428
tRNA-iMet-CAT-1-4	72.9976	72.9542	92.6543	55.2081	107.649	81.0378	73.6496	96.4103	98.9388	67.8137	69.9386	76.5595	75.0287	99.6064	82.1453	68.139	69.5723	60.3309	62.7666	79.2447	73.9945	77.8134	70.6015	77.2088	87.3456	87.8059	77.1694	104.642	93.2514	79.2775	74.0326	56.0729	74.1111	70.3022	72.9761	80.6044
tRNA-Ser-GCT-1-1	14.5995	4.4364	5.9777	8.71706	7.29825	4.05189	7.53235	11.8322	11.8296	8.47672	13.1135	15.0799	15.491	3.62205	14.0959	23.4962	16.5648	2.26241	2.4141	2.83017	19.7319	31.7606	19.4154	21.6185	15.9664	16.6883	5.71625	31.59	21.6909	15.2457	20.5646	0	16.2118	15.2831	13.1596	8.27829
tRNA-Gln-CTG-5-1	14.5995	12.8163	10.461	5.81138	1.82456	4.05189	3.13848	6.57343	3.22627	8.47672	4.37116	5.21997	8.77201	9.05513	19.9287	28.1954	9.9389	2.26241	0.8047	14.1508	14.7989	21.4384	15.297	13.1255	11.2704	24.6473	17.1487	23.6925	11.3296	12.8064	5.4839	6.67535	25.4757	21.3963	14.356	4.79269
tRNA-Val-AAC-5-1	49.2734	58.6591	61.2714	14.5284	25.5439	24.3113	46.4495	68.3637	63.4499	19.0726	7.28527	48.1397	68.683	59.7638	82.6314	75.1879	56.3205	12.0662	18.5081	19.8112	17.2654	52.4049	40.5959	27.7952	67.6224	74.1986	40.0137	33.5644	71.9479	16.4653	16.4517	8.01042	53.2674	61.1323	26.3193	23.0921
tRNA-Arg-ACG-3-2	43.7986	83.3058	38.855	17.4341	12.7719	21.6101	68.4188	61.352	26.8855	10.5959	10.1994	32.4798	84.174	16.2992	39.8575	51.6916	71.2288	7.54136	43.4538	33.962	9.86593	37.3187	26.4756	28.5673	22.5408	48.7811	25.7231	57.2568	40.8641	17.685	31.5324	13.3507	41.6875	22.9246	27.5156	10.0211
tRNA-Ser-CGA-3-1	43.7986	59.645	46.3272	26.1512	34.6667	36.467	56.2834	53.4639	41.9414	14.8343	13.1135	33.6398	70.1761	36.2205	46.1764	35.2443	62.9464	10.5579	41.0397	14.1508	12.3324	46.8468	38.2425	39.3765	30.9936	39.7951	31.4394	37.5131	50.5475	25.6127	31.5324	13.3507	53.2674	25.9812	32.3009	25.7063
tRNA-Val-CAC-2-4	51.0983	64.5743	76.2157	58.1138	32.8421	43.2202	55.6557	57.408	54.8465	19.0726	10.1994	55.0996	80.6278	47.0867	67.5633	42.2932	62.9464	21.1158	37.8209	65.0938	61.6621	80.1955	78.8383	74.1204	46.0208	68.2935	48.5881	43.4362	69.7207	64.6417	49.3551	10.6806	81.059	70.3022	66.9945	39.6486
tRNA-Ile-AAT-1-6	82.1223	88.2352	79.2045	66.8308	49.2632	60.7783	78.6712	88.9605	87.1092	33.9069	46.6257	45.8197	80.8145	54.3308	63.6748	86.936	62.9464	36.9527	50.6961	48.1128	61.6621	75.4314	64.1297	68.7158	67.6224	70.0907	71.4531	59.2312	63.5233	69.5203	49.3551	40.0521	60.2153	62.6606	64.6018	59.2551
tRNA-Thr-AGT-5-1	18.2494	20.2103	20.9219	23.2455	12.7719	2.70126	15.9016	12.7086	11.8296	12.7151	7.28527	16.8199	13.2513	9.05513	12.1517	7.04886	26.5037	5.27895	7.2423	25.4715	22.1983	26.9965	24.7105	47.0974	9.39201	16.945	8.57437	7.8975	19.6574	23.7833	12.3388	18.691	25.4757	22.9246	27.5156	12.6353
tRNA-Ser-GCT-4-2	56.5731	70.4895	68.7435	87.1706	31.0176	60.7783	23.8524	68.3637	61.299	36.0261	14.5705	70.1795	69.6162	48.8977	104.018	89.2856	82.8242	10.5579	30.5786	65.0938	91.2599	93.6937	100.019	86.4739	75.136	87.0357	54.3044	67.1287	91.4116	85.3758	30.1614	17.3559	92.6389	100.868	101.688	33.5488
tRNA-Ile-TAT-2-2	21.8993	0.985868	1.49442	63.9251	12.7719	4.05189	8.36927	3.0676	3.22627	6.35754	2.91411	6.95995	4.66596	0	0.486067	2.34962	4.96945	2.26241	3.2188	33.962	34.5308	64.3152	52.3628	63.3112	0	0	0	35.5387	1.16201	45.737	15.0807	5.34028	71.7952	71.8305	68.1908	4.35699
tRNA-Val-AAC-2-1	23.7242	4.92934	5.9777	29.0569	1.82456	2.70126	2.92925	3.0676	1.07542	10.5959	4.37116	6.37996	8.2121	0	0.972134	2.34962	3.31297	3.01654	6.4376	8.4905	17.2654	52.4049	35.3007	33.1998	0.939201	1.02697	5.71625	31.59	3.48603	18.2948	17.8227	6.67535	48.6354	35.1511	23.9266	5.22839
tRNA-Ala-AGC-5-1	25.5492	4.92934	4.48327	37.7739	1.82456	4.05189	5.02156	7.01166	1.07542	8.47672	7.28527	9.85994	9.33193	1.81103	0.972134	4.69924	8.28242	4.52481	11.2658	19.8112	9.86593	50.8169	38.2425	42.4648	0	1.02697	8.57437	27.6412	4.16387	28.052	16.4517	5.34028	46.3195	51.9625	23.9266	6.97119
tRNA-Val-AAC-4-1	25.5492	5.42227	1.49442	29.0569	0	6.75315	5.44003	4.82052	1.07542	0	4.37116	9.85994	9.33193	0	0.972134	2.34962	6.62594	1.50827	5.6329	14.1508	9.86593	53.993	57.6579	41.6928	0	2.56742	0	41.4619	6.00372	19.5145	30.1614	4.00521	57.8993	48.9059	53.8349	3.0499
tRNA-Ala-AGC-5-2	21.8993	8.37988	0	26.1512	1.82456	5.40252	4.6031	3.50583	5.37711	6.35754	2.91411	8.11995	8.95865	0	0.486067	4.69924	8.28242	3.77068	4.0235	19.8112	29.5978	78.6074	64.1297	54.0462	0	1.7972	0	51.3337	4.64805	29.2717	23.3066	2.67014	57.8993	55.0191	57.4238	1.7428
tRNA-Val-CAC-3-1	5.47482	4.92934	1.49442	40.6796	9.12282	4.05189	5.85849	4.38229	6.45253	6.35754	5.82822	7.53995	6.53235	0	0.486067	0	6.62594	1.50827	4.0235	22.6413	24.6648	53.199	48.8327	34.744	0	0	0	33.5644	3.58287	23.1734	31.5324	10.6806	27.7917	47.3776	38.2826	3.0499
tRNA-Val-CAC-1-1	9.1247	3.45054	2.98885	14.5284	0	2.70126	4.39387	4.38229	4.30169	4.23836	5.82822	10.4399	5.78579	1.81103	0.486067	0	14.9084	5.27895	2.4141	8.4905	17.2654	46.0528	30.0056	36.2881	2.8176	0.513485	0	47.385	5.81006	10.9769	17.8227	6.67535	32.4236	29.0379	25.1229	3.48559
tRNA-Ile-AAT-1-7	5.47482	2.9576	2.98885	5.81138	1.82456	1.35063	3.34771	2.19114	0	0	4.37116	1.73999	3.54613	0	0.486067	0	4.96945	0.754136	0.8047	5.66033	2.46648	19.0563	11.1786	11.5813	0	0.770227	2.85812	49.3594	2.80819	9.14741	15.0807	2.67014	9.26389	12.2265	21.5339	2.6142
tRNA-Met-CAT-4-1	5.47482	2.9576	1.49442	8.71706	5.47369	4.05189	2.51078	3.50583	1.07542	0	2.91411	8.11995	3.17285	0	0	2.34962	3.31297	0.754136	4.0235	2.83017	0	19.0563	1.76504	9.26506	0	0.256742	0	49.3594	1.83985	7.92775	1.37097	2.67014	20.8438	13.7548	10.767	3.48559
tRNA-Ile-AAT-3-1	5.47482	6.90107	1.49442	2.90569	1.82456	1.35063	3.55694	1.31469	3.22627	4.23836	2.91411	4.05997	1.49311	5.43308	2.43034	7.04886	4.96945	2.26241	4.8282	0	4.93297	9.52817	7.64849	5.40462	1.8784	2.82417	5.71625	15.795	5.51955	10.9769	4.11292	1.33507	11.5799	3.05662	7.17798	2.6142
tRNA-Ala-AGC-5-3	16.4245	9.85868	4.48327	8.71706	0	2.70126	2.51078	4.82052	0	4.23836	4.37116	5.21997	6.53235	1.81103	2.9164	2.34962	11.5954	2.26241	0.8047	11.3207	2.46648	9.52817	7.06015	6.94879	2.8176	6.93205	0	49.3594	10.5549	10.3671	1.37097	5.34028	11.5799	6.11323	10.767	3.48559
tRNA-Val-AAC-3-1	12.7746	15.7739	5.9777	5.81138	1.82456	5.40252	3.34771	5.69697	4.30169	4.23836	4.37116	10.4399	9.14529	1.81103	4.86067	4.69924	6.62594	4.52481	5.6329	11.3207	4.93297	11.1162	12.9436	12.3534	5.6352	7.95902	2.85812	47.385	12.4916	7.92775	2.74195	2.67014	16.2118	12.2265	11.9633	8.27829
tRNA-Val-CAC-5-1	10.9496	16.2668	2.98885	29.0569	32.8421	1.35063	4.81233	2.62937	3.22627	4.23836	0	9.85994	2.4263	3.62205	5.8328	0	3.31297	0.754136	3.2188	22.6413	17.2654	34.9366	35.8891	43.2369	2.8176	6.41856	0	27.6412	8.23091	36.5896	5.4839	6.67535	27.7917	42.7926	38.2826	20.0422
tRNA-Ala-AGC-10-1	16.4245	26.6184	2.98885	52.3024	20.0702	1.35063	9.62466	3.94406	0	2.11918	1.45705	14.4999	3.54613	3.62205	4.3746	9.39848	9.9389	6.03309	1.6094	42.4525	29.5978	79.4014	47.0677	69.4879	4.696	6.41856	5.71625	27.6412	14.8156	59.763	6.85487	6.67535	50.9514	50.4342	57.4238	25.7063
tRNA-Val-AAC-2-2	10.9496	16.7598	5.9777	26.1512	10.9474	0	7.53235	3.0676	4.30169	2.11918	1.45705	11.0199	3.91941	3.62205	1.4582	7.04886	14.9084	6.78722	1.6094	28.3017	17.2654	45.2588	42.9492	42.4648	3.7568	4.87811	2.85812	11.8462	10.7486	36.5896	2.74195	6.67535	34.7396	30.5662	33.4972	20.0422
tRNA-Tyr-GTA-1-1	25.5492	31.0548	11.9554	37.7739	21.8948	10.805	20.2955	29.3613	25.8101	10.5959	8.74232	34.2198	33.4083	21.7323	11.6656	7.04886	44.7251	21.1158	8.047	39.6223	24.6648	50.8169	46.4793	50.9578	15.9664	10.5264	28.5812	35.5387	28.0819	31.711	13.7097	25.3663	39.3715	39.736	33.4972	27.8848
tRNA-Tyr-GTA-1-2	14.5995	21.1962	4.48327	17.4341	7.29825	4.05189	14.8555	14.0233	25.8101	10.5959	5.82822	13.9199	28.1824	5.43308	4.3746	4.69924	29.8167	10.5579	3.2188	33.962	14.7989	45.2588	25.8872	30.8835	2.8176	2.31068	8.57437	19.7437	9.19926	20.1243	12.3388	13.3507	30.1076	21.3963	31.1046	10.4568
tRNA-Tyr-GTA-1-3	14.5995	18.2386	4.48327	20.3398	5.47369	0	7.32311	9.20281	10.7542	4.23836	2.91411	17.9799	6.90563	18.1103	4.3746	0	18.2213	5.27895	1.6094	14.1508	7.39945	19.8504	12.3553	13.1255	4.696	4.10788	0	15.795	11.4264	11.5867	5.4839	1.33507	25.4757	4.58492	22.7303	6.09979
tRNA-Tyr-GTA-5-1	10.9496	11.3375	8.96655	5.81138	3.64913	1.35063	2.30155	1.31469	6.45253	0	1.45705	16.8199	3.35949	5.43308	3.40247	2.34962	4.96945	3.01654	1.6094	5.66033	14.7989	6.35211	5.88346	10.0371	2.8176	2.31068	0	29.6156	7.3594	5.48844	4.11292	5.34028	16.2118	4.58492	7.17798	4.35699
tRNA-Ala-AGC-6-1	47.4484	52.7439	43.3383	40.6796	54.7369	62.129	66.3265	59.5991	48.394	86.8864	83.0521	55.6796	64.9502	48.8977	53.9534	37.5939	74.5418	56.5602	38.6256	70.7542	61.6621	47.6409	60.5996	47.8695	46.0208	62.9019	60.0206	35.5387	80.4693	53.055	60.3229	54.7378	53.2674	39.736	45.4605	47.0555
tRNA-Tyr-GTA-1-4	142.345	123.726	128.521	87.1706	114.947	128.31	98.339	141.548	116.146	186.488	169.018	112.519	104.704	128.583	111.309	138.628	89.4501	122.924	111.049	110.376	113.458	96.0757	90.0169	72.5763	106.13	118.358	145.764	69.1031	115.233	97.5723	137.097	109.476	76.4271	99.34	83.7431	91.4969
tRNA-Lys-CTT-3-4	25.5492	42.3923	23.9108	46.491	32.8421	52.6746	55.6557	44.6993	45.1677	42.3836	42.2546	49.8797	46.0997	28.9764	39.3714	35.2443	46.3815	48.2647	41.0397	56.6033	76.461	61.1391	60.0113	65.6275	46.96	48.7811	42.8719	15.795	49.7728	65.2515	41.1292	37.3819	57.8993	73.3588	58.6202	31.8061
tRNA-Pro-AGG-1-5	25.5492	52.251	40.3495	69.7365	51.0878	40.5189	71.5573	59.1609	60.2236	52.9795	45.1687	64.9596	56.7381	25.3544	48.1206	37.5939	49.6945	51.2812	36.2115	31.1318	34.5308	57.963	52.9511	51.7299	46.0208	56.7401	57.1625	7.8975	53.0652	46.3469	56.21	44.0573	53.2674	51.9625	44.2642	41.3914
tRNA-Ile-AAT-1-8	56.5731	127.177	83.6878	101.699	107.649	109.401	87.8774	118.76	118.296	114.436	104.908	78.2995	97.052	63.3859	101.102	75.1879	87.7936	122.17	75.6418	73.5843	88.7934	93.6937	98.8421	101.916	73.2576	107.832	105.751	45.4106	77.3706	82.3266	119.275	78.7691	99.5868	61.1323	92.1174	94.1111
tRNA-Ala-CGC-1-2	23.7242	67.5319	47.8216	61.0194	62.0351	55.3758	62.1419	67.4872	61.299	46.622	55.368	46.9797	58.6045	32.5985	53.9534	32.8947	56.3205	57.3143	37.8209	65.0938	49.3297	66.6972	84.7218	83.3855	47.8992	51.862	54.3044	17.7694	48.9013	67.081	74.0326	54.7378	67.1632	84.057	80.1541	62.305
tRNA-Val-CAC-2-5	98.5468	153.795	141.97	107.51	155.088	114.804	105.244	154.695	120.447	144.104	157.362	117.159	112.17	112.284	141.932	148.026	109.328	130.465	119.096	121.697	135.657	107.986	99.4304	125.078	137.123	127.601	148.622	161.899	121.333	115.257	104.194	150.863	132.01	120.736	119.633	178.637
tRNA-Arg-ACG-1-1	52.9233	125.205	85.1822	84.265	113.123	86.4403	78.8804	98.1633	89.26	59.337	110.736	57.4196	75.402	81.4961	86.0339	119.831	99.389	84.4632	75.6418	79.2447	69.0615	87.3416	71.7782	73.3484	61.048	92.4273	100.034	84.8981	90.3464	71.9596	56.21	76.099	64.8472	71.8305	86.1358	108.925
tRNA-Thr-AGT-2-1	21.8993	71.4754	32.8773	37.7739	58.386	51.3239	55.4464	74.0607	75.2795	38.1452	33.5122	39.4397	59.1644	19.9213	40.3436	39.9435	36.4426	33.9361	35.4068	56.6033	41.9302	65.9032	55.3045	60.2229	30.0544	31.8361	42.8719	39.4875	58.6816	54.8844	39.7583	32.0417	64.8472	53.4908	70.5835	64.0478
tRNA-Leu-CAG-1-5	43.7986	60.1379	46.3272	63.9251	71.158	48.6227	63.8157	72.746	77.4304	74.1713	65.5674	56.2596	66.07	48.8977	52.0092	49.342	54.664	62.5933	49.0867	45.2827	44.3967	60.3451	52.3628	58.6787	58.2304	51.6052	40.0137	43.4362	54.0335	43.2977	52.097	38.717	57.8993	47.3776	52.6385	52.7196
tRNA-Glu-TTC-1-3	18.2494	29.0831	7.47212	75.5479	52.9123	14.8569	35.5694	16.2145	31.1872	4.23836	8.74232	45.8197	21.6501	21.7323	10.2074	14.0977	16.5648	11.312	6.4376	48.1128	49.3297	52.4049	62.953	61.767	13.1488	9.49947	20.0069	19.7437	31.3743	43.9075	23.3066	6.67535	48.6354	56.5474	51.4422	56.6409
tRNA-Tyr-GTA-1-5	18.2494	20.2103	1.49442	5.81138	7.29825	5.40252	21.9693	23.2261	46.2431	12.7151	11.6564	37.1198	44.6066	30.7874	10.6935	9.39848	18.2213	13.5744	8.047	14.1508	12.3324	20.6444	11.1786	8.49297	22.5408	12.3236	11.4325	13.8206	33.1173	17.0752	9.59682	9.34549	32.4236	13.7548	21.5339	16.5566
tRNA-Trp-CCA-4-1	18.2494	3.94347	5.9777	20.3398	0	2.70126	14.6462	5.69697	4.30169	2.11918	5.82822	12.7599	16.4242	1.81103	2.9164	7.04886	16.5648	5.27895	4.8282	22.6413	17.2654	27.7905	11.1786	27.0231	0.939201	4.87811	5.71625	47.385	2.03352	19.5145	6.85487	1.33507	30.1076	7.64154	31.1046	7.84259
tRNA-iMet-CAT-1-5	3.64988	9.85868	1.49442	8.71706	1.82456	2.70126	12.5539	3.94406	1.07542	0	1.45705	9.27994	5.59916	1.81103	7.29101	4.69924	3.31297	3.77068	0.8047	5.66033	7.39945	26.2025	10.0019	19.3022	1.8784	6.93205	20.0069	21.7181	9.68343	6.7081	0	5.34028	18.5278	6.11323	17.945	2.6142
tRNA-Arg-ACG-1-2	18.2494	30.069	16.4387	17.4341	5.47369	0	20.9232	3.50583	2.15084	4.23836	0	15.0799	5.78579	10.8662	22.3591	18.797	16.5648	5.27895	5.6329	11.3207	12.3324	50.0229	26.4756	38.6044	16.9056	27.4714	31.4394	21.7181	33.4078	10.9769	2.74195	4.00521	50.9514	33.6228	49.0495	5.22839
tRNA-Ser-AGA-2-6	25.5492	34.0124	13.4498	26.1512	9.12282	0	29.2925	3.0676	10.7542	4.23836	0	15.6599	9.14529	14.4882	21.873	2.34962	19.8778	2.26241	6.4376	14.1508	17.2654	49.2289	27.0639	34.744	15.0272	25.931	17.1487	21.7181	35.635	14.6358	8.22585	4.00521	50.9514	32.0945	56.2275	6.53549
tRNA-Arg-TCG-3-2	23.7242	17.7456	13.4498	26.1512	18.2456	10.805	26.5724	12.2704	18.2822	0	2.91411	9.85994	26.6893	16.2992	11.6656	7.04886	8.28242	9.80376	7.2423	31.1318	17.2654	34.1426	21.7688	31.6556	13.1488	8.4725	11.4325	33.5644	26.0484	21.9538	13.7097	14.6858	34.7396	29.0379	32.3009	12.6353
tRNA-Trp-CCA-4-2	14.5995	19.2244	10.461	14.5284	1.82456	9.45441	6.69542	6.57343	8.60337	0	1.45705	16.2399	55.9916	19.9213	9.72134	11.7481	28.1602	9.04963	0.8047	2.83017	7.39945	21.4384	10.5902	12.3534	18.784	14.1208	11.4325	31.59	17.3333	9.14741	6.85487	5.34028	25.4757	6.11323	16.7486	2.6142
tRNA-Gly-GCC-2-8	74.8225	96.615	88.1711	90.0763	107.649	108.05	97.2928	120.951	89.26	95.3631	104.908	88.1594	83.9873	94.1733	83.1175	79.8871	69.5723	82.9549	91.7358	101.886	115.925	97.6638	97.6654	88.7901	88.2848	85.752	97.1762	63.18	100.514	106.72	95.9682	69.4236	69.4792	76.4154	74.1725	94.9825
tRNA-iMet-CAT-1-6	96.7218	152.81	135.993	72.6422	105.825	162.076	117.588	150.751	134.428	108.078	164.647	107.299	112.916	123.15	122.003	82.2367	94.4196	148.565	101.392	133.018	138.123	104.81	117.081	89.5622	121.157	110.913	131.474	84.8981	128.499	98.1822	149.436	105.47	118.115	108.51	100.492	100.211
tRNA-Ser-TGA-2-2	87.5971	135.557	128.521	69.7365	125.895	139.115	119.89	127.963	130.126	112.317	128.221	102.659	97.4253	124.961	111.795	96.3344	109.328	130.465	82.0794	113.207	120.858	102.428	100.019	90.3343	106.13	113.737	151.481	100.693	120.656	84.766	109.678	85.4444	85.691	105.453	89.7248	95.4182
tRNA-Gln-TTG-3-1	94.8969	103.516	79.2045	46.491	62.0351	48.6227	92.062	88.9605	100.014	89.0055	69.9386	84.6794	82.6809	68.819	89.4363	89.2856	97.7325	106.333	47.4773	62.2637	83.8604	63.5211	63.5413	68.7158	101.434	88.5762	111.467	47.385	97.0279	61.5925	79.5165	76.099	74.1111	65.7173	72.9761	59.6908
tRNA-Gln-TTG-3-2	83.9472	60.1379	55.2937	58.1138	41.965	41.8695	66.1173	58.2844	79.5812	42.3836	62.6533	56.2596	58.7911	52.5197	59.3002	51.6916	56.3205	69.3805	41.8444	45.2827	64.1286	57.169	60.0113	51.7299	58.2304	54.1727	71.4531	61.2056	62.2644	47.5665	49.3551	41.3872	41.6875	55.0191	52.6385	43.5699
tRNA-Ser-GCT-4-3	27.3741	37.463	32.8773	40.6796	29.193	14.8569	45.4033	47.7669	40.866	19.0726	17.4846	32.4798	38.0743	39.8426	28.678	21.1466	33.1297	24.8865	9.6564	50.943	44.3967	34.9366	35.8891	35.516	34.7504	34.1468	31.4394	49.3594	53.9367	33.5405	17.8227	6.67535	37.0556	32.0945	45.4605	23.9635
tRNA-Arg-TCG-4-1	45.6235	50.7722	47.8216	52.3024	58.386	64.8302	50.4249	62.6667	59.1482	61.4562	48.0828	56.8396	57.298	34.4095	52.4952	42.2932	56.3205	46.0023	61.9619	67.924	88.7934	78.6074	68.2481	83.3855	55.4128	65.4693	77.1694	73.0518	61.3929	68.3006	68.5487	42.7222	90.3229	71.8305	65.7982	57.5123
tRNA-iMet-CAT-1-7	80.2974	105.488	101.621	81.3593	83.9299	49.9733	84.5297	85.4546	65.6007	82.648	59.7392	59.7396	78.3882	110.473	78.2568	86.936	86.1372	84.4632	72.423	56.6033	96.1928	73.8433	71.1898	86.4739	87.3456	81.9009	111.467	114.514	97.8026	65.8613	74.0326	93.4549	85.691	85.5853	100.492	67.0977
tRNA-Leu-AAG-1-3	109.496	93.6574	101.621	87.1706	131.369	94.5441	113.194	148.998	115.07	139.866	150.077	100.919	111.983	117.717	127.35	150.376	107.671	110.858	116.682	101.886	96.1928	111.162	96.4887	87.2459	130.549	120.155	117.183	108.591	102.354	81.107	113.791	112.146	99.5868	77.9437	102.884	101.518
tRNA-Pro-AGG-1-6	180.669	123.233	152.431	95.8877	151.439	101.297	101.477	143.739	125.824	150.462	171.932	117.739	101.531	126.772	135.613	143.327	106.015	149.319	127.947	82.0748	115.925	79.4014	97.6654	74.1204	134.306	122.98	97.1762	120.437	110.391	100.621	130.243	132.172	106.535	74.8871	120.829	126.353
tRNA-Thr-TGT-3-2	122.271	97.6009	116.565	101.699	149.614	93.1935	79.7173	123.142	104.316	131.389	123.85	94.5394	90.333	126.772	122.489	98.6841	86.1372	156.106	98.9781	87.7351	93.7264	79.4014	84.7218	81.8413	124.914	109.886	117.183	122.411	100.127	90.2544	117.904	85.4444	94.9549	103.925	77.7615	136.81
tRNA-Leu-TAG-2-1	25.5492	6.40814	14.9442	23.2455	14.5965	16.2076	32.4309	15.7762	24.7347	23.311	10.1994	17.9799	37.1411	18.1103	34.5108	25.8458	18.2213	8.29549	16.8987	14.1508	19.7319	18.2623	12.9436	20.8464	27.2368	34.1468	40.0137	9.87187	17.9143	18.2948	16.4517	12.0156	9.26389	9.16985	13.1596	13.5067
tRNA-Thr-TGT-2-1	87.5971	40.9135	41.8439	26.1512	56.5615	48.6227	88.7143	81.5106	96.788	69.9329	88.8803	74.8195	87.3468	101.417	88.9503	79.8871	77.8547	63.3474	67.5948	90.5653	91.2599	69.0792	75.3083	81.0692	77.0144	70.0907	51.4462	21.7181	72.5289	69.5203	69.9197	62.7483	50.9514	76.4154	74.1725	78.4259
tRNA-Tyr-GTA-3-2	156.945	101.544	141.97	87.1706	167.86	124.258	99.3851	177.044	132.277	175.892	154.448	127.599	127.474	179.292	195.885	157.425	129.206	138.761	129.557	138.678	93.7264	124.66	104.726	97.2831	161.542	156.356	134.332	45.4106	152.998	100.621	112.42	157.538	99.5868	106.982	94.5101	125.481
tRNA-Pro-TGG-2-3	78.4724	40.9135	74.7212	81.3593	78.4562	117.505	79.7173	82.387	79.5812	105.959	80.138	92.2194	95.1856	94.1733	98.1855	63.4398	87.7936	128.203	117.486	56.6033	69.0615	71.4613	70.0131	78.753	99.5553	85.752	65.7369	29.6156	93.9292	75.0087	80.8875	84.1094	64.8472	73.3588	61.0128	64.9192
tRNA-Arg-ACG-1-3	162.42	127.177	113.576	127.85	111.298	97.2453	68.4188	102.107	98.9388	127.151	96.1655	92.7994	81.3744	112.284	124.919	126.88	99.389	111.612	123.119	82.0748	91.2599	82.5775	98.8421	120.446	108.947	112.453	88.6019	142.155	113.683	100.012	97.3392	110.811	69.4792	106.982	102.884	99.3395
tRNA-Thr-AGT-7-1	10.9496	0.492934	0	2.90569	0	0	1.04616	0	0	0	1.45705	4.05997	0.373277	0	0	0	0	0	0	2.83017	0	1.58803	1.17669	0.772088	0	0	0	1.97437	0.968343	0.609827	0	1.33507	2.31597	6.11323	1.19633	2.6142
tRNA-Glu-TTC-1-4	56.5731	77.8836	55.2937	95.8877	116.772	94.5441	72.185	92.9045	65.6007	114.436	58.2822	77.1395	86.4136	83.3072	68.5355	108.083	92.7631	77.676	84.4935	104.716	76.461	101.634	87.6635	101.144	84.528	68.807	94.3181	57.2568	100.127	94.5232	82.2585	125.497	101.903	79.472	96.9027	101.954
tRNA-Glu-TTC-2-2	98.5468	95.1362	115.071	72.6422	140.491	68.8821	56.2834	93.781	80.6566	108.078	118.021	65.5396	64.9502	68.819	87.9781	103.383	86.1372	82.9549	79.6653	113.207	133.19	65.9032	77.6616	77.2088	69.5008	86.5222	88.6019	90.8212	92.6704	90.8642	78.1456	77.434	78.7431	84.057	61.0128	117.639
tRNA-Phe-GAA-1-4	149.645	25.6326	98.632	69.7365	29.193	81.0378	61.0957	64.4196	54.8465	69.9329	77.2238	103.239	85.8537	85.1182	65.6191	75.1879	91.1066	58.8226	84.4935	62.2637	66.595	90.5176	102.372	74.8925	93.9201	75.4823	82.8856	100.693	79.1136	70.7399	63.0648	88.1146	85.691	88.6419	59.8165	30.499
tRNA-Asn-GTT-4-1	32.8489	5.42227	2.98885	2.90569	0	4.05189	3.13848	5.25875	1.07542	2.11918	1.45705	6.95995	2.61294	3.62205	1.94427	2.34962	0	4.52481	3.2188	0	0	2.38204	4.11842	2.31626	2.8176	1.54045	2.85812	11.8462	2.32402	1.21965	2.74195	1.33507	6.94792	1.52831	4.78532	1.7428
tRNA-Met-CAT-1-2	122.271	53.7298	77.7101	92.982	138.667	91.8428	95.8282	125.333	111.844	190.726	151.534	98.5994	88.0934	99.6064	77.7707	82.2367	102.702	97.2835	125.533	59.4335	96.1928	92.8997	98.2537	86.4739	108.008	79.8469	134.332	165.847	98.8678	90.2544	86.3714	92.1198	76.4271	77.9437	87.3321	112.846
tRNA-iMet-CAT-2-1	16.4245	4.4364	2.98885	0	0	0	1.46462	0.438229	0	2.11918	1.45705	9.27994	2.4263	1.81103	2.43034	0	3.31297	1.50827	0.8047	2.83017	2.46648	3.17606	2.94173	0.772088	0	1.02697	2.85812	9.87187	1.16201	2.43931	1.37097	4.00521	2.31597	1.52831	3.58899	0.871399
tRNA-Met-CAT-5-1	12.7746	0	0	5.81138	0	1.35063	1.46462	0.876458	1.07542	0	0	3.47998	0.559916	0	0	0	0	0	0.8047	0	4.93297	1.58803	0	2.31626	0	0	0	7.8975	0.581006	1.21965	0	2.67014	2.31597	3.05662	1.19633	1.3071
tRNA-Thr-CGT-1-1	71.1727	69.9966	91.1599	78.4536	102.176	70.2328	90.3881	63.9814	70.9778	82.648	88.8803	95.1194	76.1485	115.906	77.7707	86.936	94.4196	111.612	79.6653	99.0558	78.9275	73.8433	73.5432	66.3996	101.434	84.2115	80.0275	104.642	85.9888	90.2544	75.4036	101.465	85.691	81.0003	71.7798	89.7541
tRNA-Lys-CTT-8-1	21.8993	1.97174	4.48327	2.90569	3.64913	1.35063	2.51078	3.0676	5.37711	10.5959	13.1135	9.85994	3.17285	0	0.972134	2.34962	0	3.77068	1.6094	5.66033	4.93297	4.76409	5.88346	6.1767	1.8784	1.02697	0	15.795	4.64805	5.48844	2.74195	1.33507	11.5799	10.6982	4.78532	2.1785
tRNA-Lys-CTT-14-1	54.7482	4.4364	4.48327	0	0	0	2.72001	1.31469	2.15084	0	1.45705	9.27994	0.746554	3.62205	1.94427	0	1.65648	3.01654	0.8047	2.83017	2.46648	0.794014	1.17669	2.31626	0.939201	1.02697	0	19.7437	2.61453	3.65896	0	0	2.31597	1.52831	3.58899	2.1785
tRNA-Ile-AAT-4-1	31.024	3.45054	1.49442	2.90569	0	0	1.25539	3.0676	3.22627	0	1.45705	5.79996	2.05302	0	1.94427	0	6.62594	1.50827	0.8047	0	4.93297	3.97007	2.94173	3.08835	1.8784	0	0	5.92312	1.06518	2.43931	0	1.33507	4.63195	3.05662	4.78532	1.7428
tRNA-Lys-CTT-3-5	16.4245	8.87281	5.9777	2.90569	0	0	7.53235	2.62937	1.07542	2.11918	0	13.3399	5.03924	5.43308	2.9164	7.04886	13.2519	2.26241	2.4141	2.83017	4.93297	8.73416	14.7086	8.49297	1.8784	4.10788	5.71625	9.87187	5.03538	4.87862	2.74195	1.33507	13.8958	15.2831	7.17798	1.7428
tRNA-Lys-CTT-3-6	23.7242	6.90107	5.9777	5.81138	0	1.35063	10.0431	4.82052	4.30169	2.11918	2.91411	4.63997	4.8526	7.2441	2.43034	14.0977	18.2213	3.01654	1.6094	2.83017	2.46648	7.14613	9.41353	3.86044	4.696	4.87811	14.2906	7.8975	3.97021	2.43931	5.4839	2.67014	4.63195	4.58492	8.37431	0.871399
tRNA-Pro-CGG-1-3	29.199	8.87281	4.48327	14.5284	0	2.70126	10.8801	1.75292	2.15084	2.11918	1.45705	16.8199	5.97243	0	0.486067	2.34962	3.31297	6.03309	2.4141	25.4715	4.93297	25.4085	28.2406	13.8976	0.939201	2.05394	8.57437	33.5644	4.35754	17.0752	6.85487	8.01042	20.8438	24.4529	19.1413	2.6142
tRNA-Pro-TGG-2-4	65.6978	71.9683	35.8662	66.8308	36.4913	70.2328	73.2311	64.4196	49.4694	57.2179	50.9969	74.8195	81.3744	72.441	57.842	63.4398	69.5723	52.0354	58.7431	62.2637	64.1286	57.169	66.4831	62.5391	55.4128	68.2935	62.8787	43.4362	70.7859	59.1532	52.097	52.0677	92.6389	65.7173	74.1725	56.6409
tRNA-Lys-CTT-3-7	65.6978	56.6874	61.2714	75.5479	31.0176	51.3239	69.6742	64.4196	36.5643	86.8864	59.7392	84.6794	73.1623	92.3623	72.9101	79.8871	79.5112	63.3474	55.5243	42.4525	66.595	63.5211	62.3646	71.8042	67.6224	62.9019	51.4462	71.0775	73.594	78.0579	38.3873	60.0781	57.8993	81.0003	76.5651	50.1054
tRNA-Arg-CCT-3-1	54.7482	64.0814	41.8439	78.4536	38.3158	21.6101	49.5879	41.1935	24.7347	29.6685	17.4846	85.8394	42.5536	57.9528	50.551	51.6916	57.9769	38.4609	41.8444	56.6033	76.461	69.8733	69.4248	69.4879	55.4128	51.862	42.8719	45.4106	55.0019	74.3989	74.0326	52.0677	55.5833	68.7739	71.7798	56.2052
tRNA-Arg-CCG-2-1	85.7722	80.8412	55.2937	87.1706	54.7369	63.4796	75.7419	62.2285	46.2431	38.1452	62.6533	96.2794	76.1485	88.7402	76.3125	77.5375	107.671	66.3639	85.2982	70.7542	83.8604	90.5176	75.8966	95.7389	88.2848	69.0637	37.1556	49.3594	68.7523	87.8151	75.4036	72.0937	94.9549	87.1136	92.1174	77.9902
tRNA-Gly-CCC-1-2	76.6475	76.4048	82.1934	92.982	89.4036	110.752	101.477	85.8929	95.7125	67.8137	103.451	73.6595	103.958	103.228	104.504	108.083	77.8547	73.9053	109.439	104.716	81.3939	99.2518	129.436	95.7389	114.582	90.1166	114.325	92.7956	90.54	107.939	86.3714	106.806	129.694	102.397	94.5101	85.8328
tRNA-Glu-CTC-2-1	3.64988	0.492934	1.49442	0	0	1.35063	0.836927	1.75292	0	0	0	6.37996	0.373277	0	0.486067	2.34962	3.31297	0.754136	0	2.83017	0	2.38204	0	0.772088	0.939201	0.513485	0	1.97437	0.67784	1.82948	1.37097	0	11.5799	1.52831	1.19633	0.435699
tRNA-Cys-GCA-1-2	47.4484	29.0831	35.8662	31.9626	29.193	4.05189	21.7601	39.0024	44.0923	36.0261	55.368	43.4997	54.8717	10.8662	15.0681	18.797	53.0075	11.312	11.2658	28.3017	32.0643	30.1725	26.4756	16.2138	22.5408	21.5664	42.8719	69.1031	19.4637	28.052	10.9678	16.0208	37.0556	44.3209	20.3376	33.1132
tRNA-Ile-TAT-2-3	91.247	80.3482	116.565	98.7934	107.649	102.648	76.3696	103.86	125.824	97.4823	110.736	86.4194	89.5865	114.095	86.5199	84.5863	72.8853	85.2173	70.0089	65.0938	78.9275	88.9296	81.1917	85.7018	90.1632	84.9818	77.1694	77.0006	84.9237	88.4249	95.9682	86.7795	78.7431	79.472	71.7798	93.2397
tRNA-Ala-AGC-7-1	94.8969	66.5461	110.587	63.9251	62.0351	35.1164	60.2588	42.07	58.0728	52.9795	71.3956	67.2796	40.1273	70.63	71.9379	70.4886	67.9158	44.494	70.8136	67.924	69.0615	46.0528	55.3045	67.1717	78.8928	73.6851	74.3112	80.9493	67.9777	77.448	49.3551	41.3872	76.4271	73.3588	81.3504	84.09
tRNA-Ser-GCT-3-1	10.9496	11.8304	10.461	72.6422	34.6667	14.8569	24.4801	18.4056	16.1313	10.5959	45.1687	27.8398	23.5165	9.05513	14.582	16.4473	18.2213	15.0827	13.6799	45.2827	59.1956	64.3152	73.5432	77.9809	17.8448	17.7152	20.0069	35.5387	17.1397	81.107	23.3066	42.7222	85.691	85.5853	66.9945	61.8693
tRNA-Phe-GAA-1-5	27.3741	27.6043	26.8996	31.9626	10.9474	20.2594	16.5293	7.01166	8.60337	4.23836	11.6564	23.7798	36.0212	43.4646	26.7337	44.6428	29.8167	7.54136	22.5316	19.8112	24.6648	34.1426	27.6523	29.3393	37.568	30.0389	48.5881	27.6412	40.3799	29.8815	10.9678	9.34549	46.3195	18.3397	49.0495	16.9923
tRNA-Lys-TTT-1-5	56.5731	62.1097	55.2937	92.982	67.5088	55.3758	80.9727	46.014	31.1872	86.8864	52.4539	64.9596	78.9481	86.9292	76.7986	56.3909	69.5723	81.4467	57.9384	56.6033	81.3939	92.1057	94.1353	88.018	107.069	93.1975	62.8787	82.9237	102.838	91.4741	61.6939	64.0833	71.7952	103.925	90.9211	86.7042
tRNA-Phe-GAA-2-1	18.2494	16.2668	13.4498	5.81138	5.47369	2.70126	18.8309	3.50583	2.15084	8.47672	4.37116	12.1799	8.58537	3.62205	8.74921	0	8.28242	5.27895	4.8282	14.1508	4.93297	14.2923	11.1786	13.8976	5.6352	13.3506	5.71625	11.8462	7.45624	25.6127	16.4517	9.34549	18.5278	9.16985	25.1229	3.92129
tRNA-Lys-TTT-1-6	43.7986	52.251	41.8439	52.3024	18.2456	36.467	71.7665	28.4849	18.2822	25.4302	20.3988	56.2596	60.4709	32.5985	48.1206	39.9435	41.4121	49.773	43.4538	73.5843	56.7291	63.5211	60.0113	73.3484	44.1424	50.0648	40.0137	45.4106	63.4264	65.2515	42.5002	25.3663	57.8993	39.736	65.7982	35.2916
tRNA-Leu-TAA-1-1	80.2974	85.2776	86.6766	66.8308	67.5088	56.7265	91.0158	47.3287	33.3381	69.9329	36.4263	104.399	65.6968	95.9843	71.9379	82.2367	106.015	82.9549	86.1029	70.7542	54.2626	99.2518	107.667	84.1576	84.528	98.3324	68.595	37.5131	109.907	79.2775	72.6617	54.7378	88.007	91.6985	106.473	76.2474
tRNA-Arg-TCT-3-1	87.5971	104.995	86.6766	101.699	45.6141	87.7909	120.308	58.2844	44.0923	86.8864	90.3373	112.519	93.3193	128.583	100.13	105.733	144.114	107.841	98.9781	79.2447	76.461	85.7536	110.609	92.6506	107.069	113.223	114.325	49.3594	115.523	101.231	80.8875	73.4288	113.483	96.2834	113.651	71.019
tRNA-Val-TAC-1-1	74.8225	92.1786	88.1711	75.5479	58.386	99.9466	115.078	69.2402	37.6398	76.2905	85.9662	96.8594	89.2132	114.095	100.13	117.481	119.267	99.5459	84.4935	99.0558	78.9275	78.6074	100.019	84.1576	107.069	104.237	111.467	59.2312	99.0615	89.0347	94.5973	97.4601	83.375	93.2268	96.9027	74.5046
tRNA-Val-TAC-1-2	54.7482	47.8146	59.777	55.2081	45.6141	74.2846	75.9512	42.07	26.8855	52.9795	52.4539	57.4196	59.3511	77.8741	73.8822	68.139	87.7936	64.1015	70.0089	67.924	64.1286	53.199	57.0695	63.3112	61.048	72.9149	82.8856	45.4106	60.9088	70.1301	69.9197	48.0625	48.6354	56.5474	53.8349	54.4624
tRNA-Gln-TTG-4-1	12.7746	0.492934	1.49442	2.90569	0	0	0.627695	1.31469	0	0	0	3.47998	0.933193	0	0	0	0	0	0	0	2.46648	3.17606	0.588346	0.772088	0	0	0	13.8206	0.193669	2.43931	1.37097	1.33507	0	3.05662	1.19633	0.435699
tRNA-Pro-TGG-4-1	14.5995	1.97174	1.49442	0	1.82456	0	1.04616	1.75292	2.15084	0	0	1.73999	0.933193	0	1.94427	0	3.31297	0	1.6094	0	2.46648	1.58803	2.35338	0.772088	0	0	0	5.92312	0.193669	1.21965	1.37097	1.33507	0	3.05662	4.78532	0.871399
tRNA-Arg-CCT-2-2	23.7242	3.94347	2.98885	2.90569	1.82456	1.35063	1.25539	0.876458	1.07542	0	0	3.47998	3.17285	0	0.972134	2.34962	1.65648	1.50827	0.8047	0	0	0	1.76504	0.772088	0	0	0	11.8462	0.774674	1.82948	0	0	2.31597	1.52831	1.19633	1.7428
tRNA-Lys-CTT-1-1	5.47482	0.985868	1.49442	2.90569	0	2.70126	0.627695	2.19114	1.07542	0	1.45705	2.89998	1.11983	0	0	2.34962	0	1.50827	3.2188	0	2.46648	5.5581	1.17669	0	0	0.256742	2.85812	39.4875	0.581006	1.82948	2.74195	0	4.63195	3.05662	2.39266	1.3071
tRNA-Ala-TGC-8-1	7.29976	1.97174	0	0	0	0	1.67385	0.876458	0	0	0	2.31998	2.79958	0	0.486067	0	0	0	1.6094	0	0	0	2.35338	0	0	0	0	13.8206	0.193669	1.82948	0	0	4.63195	1.52831	0	0.435699
tRNA-Ala-CGC-4-1	7.29976	1.4788	0	0	0	0	1.25539	0	1.07542	2.11918	0	1.15999	1.11983	0	0	0	0	0	0.8047	5.66033	0	0.794014	1.17669	0.772088	0	0	2.85812	9.87187	0.0968343	0.609827	0	0	0	0	0	0.871399
tRNA-Ala-TGC-5-1	3.64988	0.985868	1.49442	2.90569	1.82456	0	0.836927	0.438229	1.07542	0	0	2.31998	0.559916	0	0	0	0	0.754136	0	0	4.93297	0	0	0	0	0	0	7.8975	0	1.82948	0	0	0	0	3.58899	0.871399
tRNA-Ala-TGC-5-2	1.82494	0.985868	0	0	0	0	0.418464	0.438229	0	2.11918	0	1.73999	1.11983	0	0	0	1.65648	0	0.8047	0	0	0.794014	0	2.31626	0	0.256742	0	15.795	0.193669	0.609827	2.74195	0	2.31597	0	2.39266	0.871399
tRNA-Ala-CGC-3-3	3.64988	0	0	0	0	0	0.209232	0.876458	1.07542	0	0	1.73999	0.373277	0	0.486067	0	1.65648	0	0	0	0	0	0	0	0	0	0	0	0.193669	0.609827	0	0	0	1.52831	1.19633	0.871399
tRNA-Ala-TGC-7-1	3.64988	0	0	0	0	1.35063	0.627695	0.438229	0	0	0	0.579996	0	0	0	0	0	0	0	0	0	0.794014	0	1.54418	0	0	0	3.94875	0	0	0	0	0	0	1.19633	0
tRNA-Ala-TGC-7-2	0	0.492934	0	0	0	0	0.209232	0	0	0	0	1.15999	0	0	0	0	0	0	0	0	0	1.58803	0	0	0	0	0	0	0	0	0	0	2.31597	0	2.39266	0
tRNA-Ala-CGC-6-1	5.47482	0.492934	0	0	1.82456	2.70126	0.209232	0	1.07542	0	1.45705	2.31998	1.11983	0	0.486067	0	0	0	0.8047	0	0	0.794014	1.17669	0	0	0	0	3.94875	0.0968343	0.609827	0	0	0	0	1.19633	0
tRNA-Ala-TGC-5-3	9.1247	0.985868	0	0	1.82456	0	1.46462	0.438229	1.07542	0	0	2.89998	1.49311	0	0	2.34962	0	0	3.2188	0	0	1.58803	0.588346	0	0	0	0	11.8462	0.290503	1.21965	1.37097	0	0	0	0	0.435699
tRNA-Ala-CGC-7-1	9.1247	0.492934	0	0	0	0	1.04616	0	0	0	1.45705	2.31998	0.746554	0	0	2.34962	0	0	1.6094	0	0	0	0	0	0	0	0	7.8975	0.193669	1.21965	0	0	0	0	2.39266	0
tRNA-Ala-TGC-6-1	3.64988	0.492934	1.49442	29.0569	7.29825	0	0.209232	0.876458	1.07542	2.11918	0	4.63997	1.11983	1.81103	0	0	0	1.50827	1.6094	36.7922	32.0643	30.1725	41.1842	43.2369	0.939201	0	0	43.4362	0.968343	33.5405	9.59682	12.0156	25.4757	25.9812	38.2826	13.071
tRNA-Val-TAC-1-3	65.6978	50.2793	26.8996	52.3024	54.7369	52.6746	42.6833	76.2518	60.2236	86.8864	77.2238	69.5995	56.1782	52.5197	41.8018	51.6916	69.5723	55.806	65.1807	36.7922	36.9972	57.963	42.9492	47.8695	48.8384	39.0249	40.0137	63.18	52.4842	45.1272	45.2422	61.4132	23.1597	50.4342	39.4789	38.3415
tRNA-Leu-TAA-4-1	9.1247	1.97174	0	2.90569	0	1.35063	0.836927	0.876458	0	0	1.45705	1.73999	1.86639	0	0.972134	0	1.65648	0	0	0	2.46648	0.794014	0.588346	0.772088	0	0	0	3.94875	0.581006	1.82948	0	1.33507	0	1.52831	2.39266	0.435699
tRNA-Ser-AGA-3-1	27.3741	1.4788	2.98885	0	3.64913	1.35063	0.627695	0.876458	0	0	0	2.89998	0.933193	0	0	0	0	0	1.6094	0	0	0.794014	1.17669	2.31626	0	1.02697	0	1.97437	1.93669	1.21965	2.74195	2.67014	4.63195	1.52831	5.98165	0.871399
