# Supplementary material for: Cell type–specific analysis by single-cell profiling identifies a stable mammalian tRNA–mRNA interface and increased translation efficiency in neurons
Source: HighWire-hosted journal article supplement (doi:10.1101/gr.275944.121), 2021-12-02
Supplement: Supplemental_Table_S6.xlsx [file Supplemental_Table_S6.xlsx]

## Sheet: anticodon_usage
# Table S6. Adult mouse anticodon usage by cell type matrix
	Bone_Marrow Hematopoietic progenitors	Bone_Marrow Erythroblasts	Bone_Marrow Monocytes	Cerebellum Inhibitory neurons	Cerebellum Cerebellar granule cells	Heart Endothelial II cells	Heart Cardiomyocytes	Kidney Proximal tubule	Kidney Proximal tubule S3	Kidney DCT CD	Kidney Loop of henle	Intestine Enterocytes	Liver Hepatocytes	Lung T cells	Lung B cells	Lung Dendritic cells	Lung Alveolar macrophages	Lung Type I pneumocytes	Lung Endothelial II cells	Prefrontal_Cortex Inhibitory neurons	Prefrontal_Cortex SOM Interneurons	Prefrontal_Cortex Ex neurons SCPN	Prefrontal_Cortex Ex neurons CPN	Prefrontal_Cortex Ex neurons CThPN	Spleen T cells	Spleen B cells	Spleen Dendritic cells	Testes Sperm	Thymus T cells	Brain Inhibitory neurons	Brain Astrocytes	Brain Oligodendrocytes	Brain Ex neurons SCPN	Brain Ex neurons CPN	Brain Ex neurons CThPN	Brain Cerebellar granule cells
AAC	311.662	360.374	346.479	315.251	271.811	264.181	281.228	294.949	265.828	305.94	299.662	292.652	326.469	340.874	403.297	290.595	302.434	276.58	280.721	281.276	248.563	369.554	351.003	314.016	374.281	355.228	302.212	312.808	347.914	275.466	288.115	308.954	383.305	359.778	324.434	317.51
AAG	379.947	432.344	471.901	284.01	312.49	370.428	368.264	399.448	391.389	372.449	401.609	351.539	393.383	401.258	448.56	437.114	380.966	341.85	363.188	319.767	271.159	287.35	265.338	291.111	440.154	431.406	359.632	283.1	415.04	272.392	384.626	389.366	297.392	256.984	286.868	293.856
AAT	421.969	506.94	434.274	454.416	356.867	449.395	483.511	487.209	538.443	396.836	454.127	438.383	488.258	336.978	369.731	466.418	437.777	481.364	394.009	393.787	439.378	427.751	415.529	410.067	335.356	424.382	429.141	349.506	341.321	439.639	505.266	369.616	414.146	359.778	472.422	412.581
ACG	590.057	650.354	506.392	406.134	432.678	433.602	418.999	479.519	410.619	441.175	481.931	391.392	435.421	409.049	465.343	556.771	494.588	438.123	460.649	417.473	328.906	378.283	363.797	401.201	422.189	458.689	444.251	487.562	475.373	359.705	357.66	399.242	354.667	399.081	376.799	421.679
AGA	281.897	335.684	239.87	249.929	251.471	261.31	335.243	257.854	295.239	212.828	282.671	274.212	311.621	373.988	319.891	263.734	277.37	185.203	250.733	266.472	248.563	318.631	287.588	313.277	328.369	330.375	275.013	351.254	397.559	272.392	254.052	201.737	270.957	293.264	308.497	254.736
AGC	577.8	594.67	542.451	675.943	717.432	462.317	466.891	516.614	489.802	516.551	597.779	554.373	569.441	527.868	461.783	515.257	519.651	472.389	466.48	760.926	630.194	758.749	717.58	740.338	461.114	466.523	513.76	704.256	586.749	686.821	482.557	521.977	693.915	755.836	687.573	664.588
AGG	411.464	344.089	428.003	326.611	395.697	380.478	429.496	425.234	441.161	445.609	478.841	430.055	401.097	356.457	395.668	437.114	344.206	420.989	431.494	316.806	356.524	317.176	332.09	314.016	414.204	384.132	426.118	298.828	382.076	366.468	387.465	404.885	326.03	321.986	324.434	362.544
AGT	325.669	404.501	428.003	440.215	403.093	420.68	499.912	458.71	499.983	381.317	379.984	391.987	458.176	338.926	374.308	380.949	367.599	379.38	405.671	574.396	404.228	433.571	436.667	471.393	403.225	392.506	423.096	314.556	430.323	490.674	454.171	447.207	442.784	480.712	515.68	448.972
CAA	288.9	309.417	285.335	284.01	351.32	383.35	314.905	361.449	296.37	350.28	395.43	309.307	304.872	270.751	251.234	285.711	270.687	348.377	290.717	290.159	286.224	288.805	249.206	268.945	262.496	246.363	271.991	358.244	287.082	289.608	361.918	335.758	266.551	270.589	286.868	308.867
CAC	374.695	445.477	432.706	460.096	397.546	402.015	362.141	397.639	392.52	421.222	403.153	425.297	415.752	391.518	436.354	420.02	394.334	407.119	395.675	384.904	441.889	469.217	430.548	455.138	429.176	428.704	420.074	461.349	420.833	436.565	394.561	387.956	411.943	477.688	453.07	418.495
CAG	386.951	381.912	293.174	411.814	384.603	337.405	375.7	364.163	421.931	308.157	273.403	371.763	387.02	292.178	314.805	341.877	369.27	348.377	343.196	325.688	354.013	325.906	349.334	356.87	336.354	323.622	323.367	393.195	283.086	349.866	354.821	396.42	374.494	331.056	311.912	337.07
CAT	770.4	863.637	917.15	707.184	965.205	782.493	838.217	935.514	913.996	931.123	1047.27	808.956	880.291	956.395	840.668	776.549	706.793	953.753	786.352	781.652	916.418	855.502	822.714	822.352	874.32	827.424	961.033	845.806	922.777	838.696	830.282	814.002	821.683	798.163	824.177	858.824
CCA	371.193	313.62	357.453	400.454	425.282	430.73	347.489	332.044	330.305	405.704	338.278	375.332	382.006	356.457	342.777	393.158	397.675	416.91	366.52	408.591	401.717	386.286	363.797	398.985	363.302	317.679	341.499	487.562	316.249	404.591	316.501	371.027	400.928	312.916	374.522	438.055
CCC	134.82	142.363	131.693	181.766	171.962	192.393	188.068	156.522	164.021	137.451	168.367	155.248	172.009	142.193	179.526	158.729	165.42	128.908	192.423	210.217	173.241	185.504	208.599	190.626	177.659	177.749	226.659	179.996	154.629	214.593	168.895	208.791	218.087	195.006	171.893	186.503
CCG	187.347	202.776	184.998	213.007	203.396	167.985	161.608	162.403	170.809	161.838	174.545	195.696	199.97	161.672	163.76	192.916	220.559	184.387	176.596	183.57	185.794	184.777	193.58	209.836	185.643	163.162	126.929	197.471	148.635	197.991	180.249	211.612	185.044	201.052	211.736	220.62
CCT	428.973	450.205	426.435	332.291	351.32	379.043	336.555	313.044	286.189	341.412	335.189	408.642	334.183	344.77	407.874	400.484	347.548	412.015	450.653	284.237	301.288	253.886	279.245	293.328	379.271	372.786	404.964	284.848	340.023	322.812	377.53	344.223	253.334	315.939	311.912	357.085
CGA	129.567	174.408	164.617	119.284	138.679	165.113	179.321	178.236	167.415	130.801	145.197	140.972	176.444	132.454	132.228	136.751	138.685	88.9299	166.6	159.883	155.665	156.406	145.185	156.638	107.793	131.286	123.907	181.743	152.831	143.267	150.444	112.86	167.421	133.027	160.51	142.379
CGC	178.593	167.579	202.243	213.007	338.376	193.829	195.285	168.284	168.546	197.309	219.34	177.851	190.328	200.629	196.817	166.055	180.458	202.336	180.761	239.825	223.455	229.88	231.962	240.13	196.622	172.346	190.393	153.783	182.498	245.337	193.023	220.077	198.261	253.961	248.164	282.939
CGG	241.626	192.795	211.65	133.485	231.131	281.41	203.595	234.331	234.155	199.526	264.135	212.351	196.884	237.638	238.011	271.06	218.889	256.183	240.737	171.727	183.284	135.309	203.593	163.288	217.582	235.828	268.968	228.927	205.172	176.47	269.664	299.079	154.203	185.936	178.723	241.544
CGT	150.578	125.553	166.184	207.327	175.66	127.783	180.415	146.57	164.021	148.536	183.813	176.067	193.221	181.15	126.126	124.541	147.04	206.415	180.761	219.099	208.391	205.146	196.917	195.059	155.701	142.901	166.216	213.199	148.335	221.357	187.346	204.558	211.479	202.564	215.151	161.03
CTC	493.757	461.237	496.985	485.657	497.395	598.715	505.598	507.114	507.901	558.674	512.824	485.374	475.531	617.469	511.622	451.766	502.942	568.662	582.267	583.278	519.722	449.575	491.737	485.431	462.112	491.106	477.494	382.71	483.863	493.748	570.553	533.263	449.392	512.457	445.101	502.649
CTG	351.933	309.943	329.233	286.85	275.509	244.08	314.468	243.378	262.434	290.422	264.135	354.513	274.597	278.543	313.28	393.158	375.954	270.869	268.226	302.002	323.885	341.91	347.665	328.793	312.4	306.874	368.698	398.437	323.042	300.676	337.79	331.526	337.044	356.755	338.095	261.104
CTT	698.613	502.212	500.121	451.575	327.282	539.849	465.36	395.829	386.864	474.429	454.127	493.701	475.724	553.19	472.463	461.534	467.853	454.44	435.659	473.728	469.507	429.206	448.349	432.233	506.028	492.456	480.517	403.68	513.93	446.403	425.786	440.153	420.755	491.293	440.548	365.273
GAA	490.255	387.166	482.875	417.494	386.452	473.803	397.787	391.305	424.193	545.372	495.832	457.417	477.845	451.902	402.28	461.534	464.512	451.992	474.81	420.434	434.357	412.474	428.88	466.96	440.154	420.871	441.229	382.71	422.032	453.166	432.882	474.011	502.262	435.362	405.258	353.901
GCA	926.231	315.721	355.885	408.974	345.773	423.551	438.243	356.925	417.406	425.656	420.145	710.216	446.991	440.215	389.057	417.578	384.308	341.034	372.351	399.708	441.889	446.665	414.973	427.061	376.277	359.82	404.964	760.177	329.235	498.667	390.303	410.528	447.189	420.245	445.101	419.859
GCC	506.013	426.04	448.384	548.139	702.64	650.403	517.188	462.329	453.604	516.551	576.154	535.339	463.189	592.147	490.771	459.092	467.853	547.449	595.595	636.572	718.07	608.163	602.434	575.572	547.947	507.044	610.468	580.181	548.991	613.65	552.102	475.422	570.552	633.391	580.567	575.43
GCT	327.42	387.691	377.834	372.053	301.395	363.249	330.651	384.067	375.553	345.846	336.734	361.056	362.144	379.831	418.554	400.484	369.27	305.952	312.375	417.473	411.76	380.466	402.735	419.673	375.279	400.881	353.588	438.631	406.849	407.05	383.207	366.795	447.189	442.92	412.088	354.811
GTA	752.891	904.087	774.482	590.74	833.922	821.259	631.998	918.776	799.746	869.048	903.62	801.818	725.445	911.595	761.331	864.46	773.629	864.007	763.028	778.691	612.619	656.176	591.865	588.133	796.47	720.991	846.193	739.206	811.6	643.779	742.286	869.021	663.074	631.879	597.642	720.994
GTC	731.88	747.014	658.466	729.905	721.13	712.141	698.696	729.231	765.811	642.918	597.779	701.294	681.671	693.435	724.714	798.527	721.831	693.49	781.354	666.18	660.323	635.807	664.179	696.745	725.606	709.375	743.441	627.364	734.785	656.691	728.093	730.768	704.929	721.068	695.541	735.095
GTG	632.079	551.593	525.205	394.773	569.508	430.73	369.576	434.734	453.604	516.551	426.323	487.753	420.958	522.024	482.125	498.164	439.448	457.703	464.814	435.238	404.228	397.925	367.69	415.239	477.083	434.647	504.694	419.408	427.226	405.821	364.756	488.119	425.16	400.593	373.384	473.081
GTT	588.306	387.691	475.036	505.537	412.338	407.758	481.105	479.519	463.785	483.297	532.904	436.598	471.481	449.954	425.165	402.926	436.106	381.012	484.806	521.101	537.297	429.934	475.049	447.749	400.231	424.112	386.831	515.522	419.335	459.93	415.851	416.171	522.088	515.48	463.315	498.555
TAA	171.589	179.662	192.837	170.406	173.811	178.035	166.419	144.308	132.348	206.177	139.018	212.946	144.048	208.42	163.251	180.706	187.141	157.463	218.246	168.766	158.176	173.137	183.011	159.594	162.687	191.256	175.283	78.639	201.676	167.247	167.476	126.967	167.421	157.214	167.34	166.033
TAC	187.347	202.776	183.43	178.926	160.867	241.209	244.27	193.617	131.217	226.13	228.608	229.601	211.54	262.96	225.806	246.64	279.041	237.418	227.409	213.178	183.284	173.865	189.13	186.932	230.557	227.454	247.814	148.54	219.157	205.985	217.151	218.666	147.595	198.029	181	174.676
TAG	271.391	242.701	288.471	224.368	240.377	281.41	253.455	208.093	237.548	288.205	247.144	218.299	234.102	274.647	275.646	280.827	235.598	234.971	250.733	260.551	188.305	192.779	212.493	189.887	257.505	250.685	223.637	92.6192	229.046	219.512	255.471	296.257	165.218	228.262	199.214	243.364
TAT	329.171	212.757	340.208	335.131	177.509	294.332	206.219	257.402	255.647	248.299	251.778	237.333	201.127	235.69	243.606	283.269	205.521	243.129	249.9	225.021	230.988	262.616	278.688	272.639	213.59	228.534	226.659	188.733	195.283	296.372	237.021	228.541	273.16	326.521	268.654	160.12
TCA	47.2746	38.3488	120.719	82.3628	68.4149	76.0957	69.5416	101.332	100.675	55.424	94.2236	71.9733	80.2193	77.9141	57.4685	56.1655	83.5452	80.7712	120.785	91.7849	75.322	65.4721	83.4396	85.7078	94.8178	83.4718	84.6193	94.3667	67.7249	88.5427	79.48	84.6449	107.942	77.0953	87.6542	88.2478
TCC	334.424	424.464	437.41	394.773	425.282	473.803	387.727	389.948	400.439	410.137	353.725	373.547	358.287	442.162	472.463	422.462	402.688	458.519	399.84	304.963	371.589	293.897	338.765	345.048	387.256	428.164	468.428	304.071	391.066	349.252	398.819	455.672	328.233	380.941	305.082	465.348
TCG	262.636	263.714	243.005	295.37	303.244	323.048	273.793	300.378	305.419	226.13	271.858	254.583	277.297	239.586	243.097	297.921	264.003	274.133	323.204	278.315	376.61	288.805	281.47	307.366	247.524	238.799	232.703	326.789	246.127	304.98	320.758	238.416	310.609	296.288	281.176	311.597
TCT	322.167	246.903	258.683	295.37	338.376	258.438	302.003	223.474	209.269	252.733	278.037	294.436	255.506	280.491	260.388	246.64	317.472	292.898	256.564	296.08	278.691	304.809	314.845	334.704	256.507	281.751	278.035	202.714	263.308	354.171	246.956	248.292	310.609	376.406	326.711	343.439
TGA	203.106	230.618	244.573	176.086	264.414	239.773	209.5	234.783	249.991	243.866	259.501	204.023	183.193	278.543	217.16	192.916	213.876	252.104	191.59	236.864	210.902	183.322	181.342	180.282	240.538	229.615	296.167	241.159	234.64	177.7	195.861	218.666	163.015	199.541	190.107	208.338
TGC	150.578	169.155	163.049	227.208	101.698	176.599	246.676	182.308	223.974	161.838	159.099	199.86	233.909	142.193	139.857	148.961	147.04	177.044	172.431	254.629	233.498	253.886	246.425	267.467	126.756	133.987	84.6193	183.491	176.804	221.357	251.214	210.201	222.493	237.332	250.44	119.635
TGG	397.457	284.202	365.292	323.771	332.829	450.831	387.509	349.235	355.191	390.185	386.162	391.987	405.725	438.267	415.503	334.551	377.624	447.913	437.325	325.688	321.374	314.266	329.308	314.016	393.245	392.776	426.118	211.451	401.155	350.481	400.238	404.885	374.494	341.638	338.095	347.533
TGT	311.662	231.669	269.658	303.89	371.659	242.645	309.657	326.616	341.617	301.506	281.126	295.626	288.867	352.561	339.725	317.457	290.737	335.323	280.721	349.375	328.906	285.167	309.283	285.2	305.413	299.31	296.167	167.763	272.298	293.298	325.016	239.827	255.537	332.568	289.145	398.48
TTC	351.933	286.303	297.878	494.177	501.093	317.305	289.757	372.758	328.043	427.873	344.457	416.969	324.155	370.092	285.817	329.667	401.017	359.799	314.874	518.14	479.55	385.558	408.854	412.284	364.3	292.556	317.322	241.159	384.773	438.409	296.631	306.132	387.711	388.5	381.353	461.254
TTG	297.655	306.791	249.277	213.007	236.679	232.594	268.763	294.045	312.206	303.723	356.814	290.867	261.291	272.699	284.291	266.176	262.332	315.742	218.246	245.747	286.224	209.511	227.512	207.62	304.415	267.704	341.499	284.848	268.003	221.357	254.052	246.881	233.508	219.192	210.598	220.62
TTT	399.207	365.627	352.75	423.174	345.773	397.708	483.511	315.306	274.877	354.713	353.725	410.426	391.455	364.248	413.468	358.971	434.435	380.196	379.015	467.807	436.868	445.938	440.561	445.533	421.191	411.416	374.742	433.388	463.486	441.484	359.079	327.294	429.566	402.105	465.592	398.48
