# Supplementary material for: Cell type–specific analysis by single-cell profiling identifies a stable mammalian tRNA–mRNA interface and increased translation efficiency in neurons
Source: HighWire-hosted journal article supplement (doi:10.1101/gr.275944.121), 2021-12-02
Supplement: Supplemental_Table_S7.xlsx [file Supplemental_Table_S7.xlsx]

## Sheet: AA_supply
# Table S7. Adult mouse AA supply by cell type matrix
	Bone_Marrow Hematopoietic progenitors	Bone_Marrow Erythroblasts	Bone_Marrow Monocytes	Cerebellum Inhibitory neurons	Cerebellum Cerebellar granule cells	Heart Endothelial II cells	Heart Cardiomyocytes	Kidney Proximal tubule	Kidney Proximal tubule S3	Kidney DCT CD	Kidney Loop of henle	Intestine Enterocytes	Liver Hepatocytes	Lung T cells	Lung B cells	Lung Dendritic cells	Lung Alveolar macrophages	Lung Type I pneumocytes	Lung Endothelial II cells	Prefrontal_Cortex Inhibitory neurons	Prefrontal_Cortex SOM Interneurons	Prefrontal_Cortex Ex neurons SCPN	Prefrontal_Cortex Ex neurons CPN	Prefrontal_Cortex Ex neurons CThPN	Spleen T cells	Spleen B cells	Spleen Dendritic cells	Testes Sperm	Thymus T cells	Brain Inhibitory neurons	Brain Astrocytes	Brain Oligodendrocytes	Brain Ex neurons SCPN	Brain Ex neurons CPN	Brain Ex neurons CThPN	Brain Cerebellar granule cells
*	45.5913	38.0742	118.3	81.9954	66.9625	75.4203	70.9629	100.396	99.9659	54.8448	94.0719	71.6529	79.342	75.9298	57.4169	55.3485	81.8175	79.4838	119.262	94.984	75.4933	68.3423	84.455	85.3	92.767	85.9292	84.4588	96.865	69.27	88.339	80.859	85.5951	108.079	75.5046	88.9496	87.8906
A	874.677	924.733	889.558	1111.18	1132.93	825.355	927.427	859.194	876.106	866.548	974.646	927.934	982.811	848.515	797.739	818.195	829.63	838.193	809.337	1299.14	1089.62	1296.98	1210.52	1242	767.525	795.61	787.277	1069.1	967.635	1150.86	942.873	962.945	1116.08	1221.4	1203.71	1062.84
C	893.251	313.46	348.756	407.149	338.432	419.792	447.2	353.628	414.465	421.208	419.468	707.054	442.103	429.003	388.707	411.504	376.361	335.598	367.656	413.64	442.894	466.246	420.023	425.029	368.138	370.413	404.196	780.301	336.746	497.52	397.075	415.136	447.755	411.574	451.679	418.16
D	705.821	741.664	645.275	726.649	705.821	705.821	712.976	722.494	760.415	636.2	596.817	698.171	674.216	675.775	724.062	786.911	706.903	682.437	771.502	689.4	661.824	663.68	672.262	693.43	709.911	730.26	742.031	643.973	751.549	655.181	740.726	738.971	705.821	706.19	705.821	732.12
E	815.577	742.186	778.939	975.462	977.29	907.89	811.61	871.744	830.054	976.238	855.9	898.326	790.941	962.41	796.723	770.066	885.266	913.662	885.829	1139.81	1001.54	871.744	911.551	893.444	808.537	806.734	793.31	640.385	888.454	930.013	882.229	848.818	838.162	882.368	838.667	960.001
F	472.798	384.393	473.202	415.632	378.247	469.598	405.917	387.691	421.205	539.673	495.034	455.381	472.619	440.393	401.918	454.82	454.905	444.788	468.823	435.088	435.345	430.556	434.099	464.738	430.634	433.261	440.393	392.841	431.66	452.124	440.393	479.332	502.897	426.379	411.247	352.469
G	940.531	985.756	997.104	1119.66	1272.29	1304.91	1115.32	999.48	1010.89	1053.02	1096.48	1059.4	982.62	1146.54	1141.73	1025.15	1014.54	1116.79	1172.88	1191.9	1265.77	1135.24	1163.79	1105.96	1088.79	1145.72	1303.08	1092.42	1119.66	1174.79	1139.25	1152.68	1118.28	1184.39	1073.17	1222.31
H	609.572	547.642	514.684	393.012	557.417	426.908	377.13	430.718	450.408	511.154	425.637	485.581	416.355	508.729	481.692	490.917	430.36	450.408	458.953	450.408	405.147	415.369	372.165	413.264	466.764	447.444	503.737	430.511	436.973	404.887	371.085	493.598	425.698	392.328	378.902	471.166
I	724.395	714.543	758.966	786.025	523.031	737.127	703.827	737.733	788.495	638.394	704.768	672.708	681.845	558.084	612.785	738.782	629.995	712.945	635.79	640.376	671.89	720.631	702.666	679.459	537.072	672.139	654.556	552.489	548.847	734.318	755.165	604.872	688.175	672.139	752.028	570.383
K	1058.73	861.624	835.785	870.847	658.766	929.236	968.264	704.566	657.079	820.478	806.551	900.102	857.695	894.073	885.135	808.569	883.629	821.332	804.402	974.352	908.436	913.509	899.727	873.59	907.163	930.483	853.638	859.228	999.715	885.843	798.482	776.062	851.396	874.965	919.531	760.662
L	1445.41	1534.96	1501.03	1368.47	1431.55	1536.87	1508.97	1463.81	1469.16	1509.33	1454.26	1457.34	1447.42	1410.4	1452.19	1504.04	1413.81	1408.23	1447.59	1412.5	1260.74	1323.56	1274.71	1260.38	1427.63	1485.83	1351.34	1237.72	1448.23	1295.64	1550.76	1562.11	1272.68	1218.44	1270.71	1343.73
M	742.969	857.452	898.776	704.029	944.714	775.549	855.348	926.872	907.556	921.393	1045.59	805.355	870.664	932.038	839.912	765.253	692.176	938.551	776.437	808.896	918.502	893.006	832.726	818.439	855.409	851.784	959.211	868.197	943.829	836.766	844.687	823.139	822.722	781.695	836.357	855.348
N	567.358	384.914	465.52	503.282	403.585	404.139	490.938	475.089	460.517	478.247	532.046	434.655	466.325	438.494	424.783	397.065	427.088	374.939	478.693	539.264	538.519	448.781	480.83	445.619	391.574	436.598	386.098	529.17	428.902	458.872	423.066	420.843	522.748	504.845	470.162	496.537
P	1013.14	815.205	984.813	780.37	939.284	1102.84	1041.46	999.48	1023.25	1024.5	1127.32	1029.79	992.729	1006.07	1048.24	1027.56	921.265	1107.15	1095.57	842.6	863.14	800.364	875.517	787.555	1002.86	1042.55	1119.08	758.776	1010.95	891.365	1075.71	1121.3	855.807	832.031	853.685	947.769
Q	626.458	612.316	566.92	497.627	501.314	472.444	595.151	532.458	570.592	587.936	619.949	642.507	530.028	537.203	597.034	649.743	625.086	577.261	480.338	566.84	611.496	575.594	582.177	533.861	603.473	591.494	708.851	701.374	604.529	520.832	602.111	584.9	571.274	564.064	556.801	479.774
R	1727.4	1800.96	1587.07	1535.29	1594.43	1548.25	1523.47	1465.16	1372.57	1408.41	1539.08	1537.87	1485.95	1399.01	1539.08	1670.08	1610.17	1576.03	1646.64	1510.55	1474.64	1472.4	1450.37	1539.08	1458.88	1559.8	1484.06	1539.08	1507.08	1536.12	1508.89	1457.97	1416.05	1555.99	1530.63	1647.72
S	908.448	1120.32	1006.32	913.259	935.665	1020.31	1076.27	1045.2	1080.53	923.587	1022.45	975.9	1022.1	1135.15	1086.86	979.428	978.538	818.924	909.682	1118.36	1029.23	1084.36	1029.23	1064.78	1029.23	1124.31	1046.69	1244.89	1219.07	998.107	1000.63	910.161	1049.91	1046.7	1087.03	956.377
T	759.855	756.268	846.54	947.188	930.235	784.087	1010.22	923.287	998.536	822.672	843.562	859.834	929.98	850.413	839.404	810.976	788.721	906.436	856.219	1182.7	943.666	964.386	954.342	947.124	845.644	859.292	883.802	713.931	870.371	1003.02	983.303	901.602	910.95	994.884	1035.05	1004.4
V	842.594	1001.4	943.331	950.015	812.599	899.352	905.781	878.019	784.002	943.331	929.923	943.331	943.331	970.003	1064.5	943.331	955.629	906.436	892.409	910.008	875.722	1057.03	982.493	951.537	1011.65	1041.16	968.26	947.124	1010.44	915.903	915.439	925.854	944.035	1014.13	972.669	906.995
W	357.976	311.374	350.292	398.667	416.253	426.908	354.591	328.977	327.978	401.464	337.733	373.661	377.828	347.379	342.469	387.439	389.451	410.265	361.899	422.832	402.631	403.219	368.224	397.086	355.444	327.032	340.852	500.469	323.464	403.66	321.992	375.192	401.435	306.46	380.057	436.282
Y	726.083	897.612	758.966	588.105	816.218	813.97	644.914	910.289	794.111	859.967	902.165	798.249	717.511	888.378	760.647	851.885	757.63	850.236	753.407	805.832	614.012	684.942	599.068	585.335	779.242	742.217	844.588	758.776	830.116	642.298	755.165	878.776	663.912	618.842	606.474	718.076
