# Supplementary material for: Cell type–specific analysis by single-cell profiling identifies a stable mammalian tRNA–mRNA interface and increased translation efficiency in neurons
Source: HighWire-hosted journal article supplement (doi:10.1101/gr.275944.121), 2021-12-02
Supplement: Supplemental_Table_S8.xlsx [file Supplemental_Table_S8.xlsx]

## Sheet: translation_efficiency
# Table S8. Adult mouse translation efficiency across cell types
Cell type	Translation efficiency	P-value	-log10(P-value)
Bone_Marrow-Hematopoietic progenitors	0.676692	0.00505441	2.29633
Bone_Marrow-Erythroblasts	0.726316	0.00100615	2.99734
Bone_Marrow-Monocytes	0.761941	0.000350636	3.45514
Cerebellum-Inhibitory neurons	0.83609	1.15964e-06	5.93568
Cerebellum-Cerebellar granule cells	0.673684	0.00679095	2.16807
Heart-Endothelial II cells	0.793531	6.03058e-05	4.21964
Heart-Cardiomyocytes	0.684211	0.00132016	2.87937
Kidney-Proximal tubule	0.664912	0.010541	1.97712
Kidney-Proximal tubule S3	0.720301	0.0021928	2.659
Kidney-DCT/CD	0.729323	0.00532595	2.2736
Intestine-Enterocytes	0.774436	6.17337e-05	4.20948
Liver-Hepatocytes	0.729323	0.0016661	2.7783
Lung-T cells	0.745865	0.000841941	3.07472
Lung-B cells	0.750376	0.000490958	3.30896
Lung-Alveolar macrophages	0.846617	2.00816e-06	5.6972
Lung-Endothelial II cells	0.83609	9.97194e-06	5.00122
Prefrontal_Cortex-Inhibitory neurons	0.813534	8.42535e-06	5.07441
Prefrontal_Cortex-SOM+ Interneurons	0.78797	3.60491e-05	4.44311
Prefrontal_Cortex-Ex. neurons SCPN	0.772932	3.32764e-05	4.47786
Prefrontal_Cortex-Ex. neurons CPN	0.837594	7.76233e-07	6.11001
Prefrontal_Cortex-Ex. neurons CThPN	0.825564	1.60433e-06	5.79471
Spleen-T cells	0.733835	0.000918852	3.03675
Spleen-B cells	0.762406	0.000197073	3.70537
Thymus-T cells	0.793985	6.83157e-05	4.16548
Brain-Inhibitory neurons	0.806015	1.31456e-05	4.88122
Brain-Astrocytes	0.814592	2.79076e-05	4.55428
Brain-Oligodendrocytes	0.769925	0.000164121	3.78484
Brain-Ex. neurons SCPN	0.825564	1.65809e-06	5.78039
Brain-Ex. neurons CPN	0.837594	6.34179e-07	6.19779
Brain-Ex. neurons CThPN	0.813534	2.35794e-06	5.62747
Brain-Cerebellar granule cells	0.780451	0.000164735	3.78321
