# Supplementary material for: Cell type–specific analysis by single-cell profiling identifies a stable mammalian tRNA–mRNA interface and increased translation efficiency in neurons
Source: HighWire-hosted journal article supplement (doi:10.1101/gr.275944.121), 2021-12-02
Supplement: Supplemental_Table_S9.xlsx [file Supplemental_Table_S9.xlsx]

## Sheet: mRNA_expression
# Table S9. Fetal human mRNA gene expression by cell type matrix
	Adrenal Adrenocortical cells	Adrenal Chromaffin cells	Adrenal CSH1_CSH2 positive cells	Adrenal Erythroblasts	Adrenal Lymphoid cells	Adrenal Megakaryocytes	Adrenal Myeloid cells	Adrenal Schwann cells	Adrenal SLC26A4_PAEP positive cells	Adrenal Stromal cells	Adrenal Sympathoblasts	Adrenal Vascular endothelial cells	Kidney Erythroblasts	Kidney Lymphoid cells	Kidney Megakaryocytes	Kidney Mesangial cells	Kidney Metanephric cells	Kidney Myeloid cells	Kidney Stromal cells	Kidney Ureteric bud cells	Kidney Vascular endothelial cells	Liver Erythroblasts	Liver Hematopoietic stem cells	Liver Hepatoblasts	Liver Lymphoid cells	Liver Megakaryocytes	Liver Mesothelial cells	Liver Myeloid cells	Liver Stellate cells	Liver Vascular endothelial cells	Cerebellum Astrocytes	Cerebellum Granule neurons	Cerebellum Inhibitory interneurons	Cerebellum Microglia	Cerebellum Oligodendrocytes	Cerebellum Purkinje neurons	Cerebellum SLC24A4_PEX5L positive cells	Cerebellum Unipolar brush cells	Cerebellum Vascular endothelial cells	Muscle Erythroblasts	Muscle Lymphatic endothelial cells	Muscle Lymphoid cells	Muscle Megakaryocytes	Muscle Myeloid cells	Muscle Satellite cells	Muscle Schwann cells	Muscle Skeletal muscle cells	Muscle Smooth muscle cells	Muscle Stromal cells
AL627309.1	7.89846	0.736887	0	1.38604	0	14.9924	5.2012	0	0	0.936869	0.492097	0	0	0.986382	0	0.546723	0.934655	1.43991	0	1.16191	0	1.0906	4.74587	2.12172	0	49.9923	0	4.2612	1.0184	1.00389	0.293345	0.26583	0.251994	21.1208	0.0821152	0.758502	0.342083	0.531142	0.406145	0	0	0	0	37.1149	0	0	0.313593	0	0.929709
SAMD11	1.27603	33.8968	0	0.693022	0	0	0.866866	25.8327	0	25.1081	21.6522	1.42794	0	0	0	125.924	63.0462	3.59977	28.2441	26.2346	2.80765	0.779001	2.37293	2.27061	1.71802	0.877058	149.293	1.21749	22.4048	0.334629	8.42074	1.79234	6.91934	1.0887	1.0675	2.16579	3.48924	1.7332	2.43687	0	0	0	0	0	1.51538	6.49101	4.3903	0	11.1565
NOC2L	17.7137	37.5812	0	22.8697	18.6126	13.4932	17.3373	18.4519	0	16.1141	28.5416	15.5975	15.7838	10.8502	0	19.9827	18.0738	14.3991	22.4504	18.5905	10.9186	25.9407	16.6105	32.6447	15.4622	10.5247	12.982	15.2186	18.3312	9.70423	14.5939	17.5005	25.1889	11.9757	14.5344	19.3347	21.0723	15.5709	16.855	0	0	28.657	0	10.6043	25.4585	19.473	25.2442	22.7363	13.9456
KLHL17	1.09297	9.49766	0	1.38604	6.20418	0	6.06806	0	0	2.81061	3.93677	1.97715	0	2.95915	0	2.84296	2.22482	0.719955	0	1.16191	1.76778	6.38781	1.18647	3.35008	3.43604	0	6.49101	1.21749	6.1104	5.68869	2.29931	4.13244	5.98486	1.0887	4.02364	4.52239	5.06282	4.36096	1.31997	0	0	0	0	0	4.84923	12.982	2.97913	0	2.09185
HES4	5.52408	4.66695	0	0	6.20418	0	5.2012	47.975	0	13.6783	0	7.79876	0	0	0	17.7958	43.1432	2.87982	10.8631	18.3459	7.48706	0.817952	0	3.57342	0	1.75412	6.49101	1.82623	14.2576	3.01166	67.3055	7.08879	18.5636	2.83062	18.8865	39.5375	44.0602	7.63168	108.948	0	22.321	0	0	0	33.6415	6.49101	17.8748	102.313	9.99437
ISG15	2.19132	1.47377	0	2.07907	15.5105	13.4932	11.2693	36.9038	0	4.12222	0.984193	22.6274	19.7298	23.6732	0	5.33055	0.87158	6.47959	7.24208	1.89574	13.3103	0.623201	5.93233	3.23841	5.15406	1.75412	0	11.5661	3.0552	2.3424	2.27774	0.845822	1.04998	2.61288	2.135	2.08469	5.26807	0.754781	36.8576	0	11.1605	0	0	0	1.21231	0	1.72476	2.84204	4.88097
AGRN	0.317661	3.02943	0	0.693022	0	0	0	23.9875	0	4.3096	0	5.2724	0	0	0	8.92526	9.00251	0.539966	0.724208	14.6767	12.5824	4.24556	0	1.52615	0	0	6.49101	1.21749	3.0552	2.3424	7.73051	3.98745	5.34437	0.870961	5.66595	7.75676	7.32057	3.35458	52.6973	0	0	0	0	0	1.51538	6.49101	0.627185	2.84204	2.32427
C1orf159	16.0769	30.7036	0	17.3255	15.5105	16.4917	14.7367	16.6067	0	16.8636	30.51	16.2566	7.89192	5.91829	0	22.9897	34.6166	13.8591	15.2084	36.5084	18.9256	50.2456	22.5429	22.7433	18.8982	21.0494	25.964	17.0448	33.6072	25.4318	39.1443	38.5332	69.2459	18.9434	32.9282	72.3774	85.3154	36.4811	10.7628	40.8203	44.642	42.9855	0	5.30213	30.3077	12.982	10.8189	25.5784	23.0103
TTLL10	0.113066	0.245629	0	0.693022	0	1.49924	0	1.84519	0	0.187374	0.492097	0.329525	0	1.97276	0	0.218689	1.17549	0.539966	0	2.38497	0.311961	0.545301	3.5594	0.372231	0	3.50823	0	0.608743	0	0	0.168242	0.221525	0.188996	0.21774	0.492691	3.10557	0.889415	0.223639	0.101536	0	0	0	0	0	1.21231	0	0.156796	0	0
TNFRSF4	0.139986	0.0818764	0	0.693022	15.5105	5.99697	0.866866	0	0	0.936869	0.492097	5.05272	0	1.97276	0	0.205021	1.2443	0.179989	0	0.550377	12.6864	0.272651	0	0.186116	3.43604	1.75412	0	0.608743	0	0.669257	0.0301973	0.044305	0.041999	0	0	0.10972	0.0684165	0.0559097	8.52904	0	22.321	14.3285	0	0	0.909231	0	0.470389	0	0.232427
SDF4	56.1668	48.8802	19.8323	40.1953	58.9398	73.4629	39.8758	84.8788	48.9425	59.5849	74.3066	64.2574	7.89192	19.7276	65.5299	27.5959	24.7024	27.8982	89.8017	33.6953	43.9865	34.315	33.2211	56.728	27.4883	35.9594	71.4011	25.5672	52.9568	27.4396	36.1505	26.1198	34.0192	28.0885	37.1161	37.3193	45.9075	26.6969	61.1248	0	122.766	71.6425	0	31.8128	82.4369	58.4191	43.119	39.7885	137.132
B3GALT6	11.4735	21.1241	0	13.8604	9.30628	31.4841	13.003	23.9875	0	18.55	24.1127	18.5632	0	10.8502	16.3825	13.7228	13.8019	10.7993	30.4167	11.4968	15.806	7.08891	7.1188	15.7082	6.87208	7.89352	25.964	4.86994	14.2576	4.01554	15.3359	15.0113	25.1784	4.57255	18.1475	27.454	30.9927	14.4247	24.2671	0	11.1605	0	0	10.6043	33.9446	25.964	24.7738	14.2102	32.5398
FAM132A	0.629939	0.0818764	0	0.693022	0	0	0.866866	1.84519	0	1.68636	0.492097	0.439367	0	0	0	1.76318	8.2112	0.179989	4.34525	0.794989	1.66379	1.3243	0	0.483901	0	1.75412	0	0.608743	1.0184	0.334629	0.129417	0.108749	0.083998	0.21774	0	0.252834	0.136833	0	0.406145	0	0	0	0	0	0	0	0.627185	0	12.3186
UBE2J2	27.3189	24.3173	0	27.0278	34.123	34.4826	25.1391	20.2971	48.9425	31.2914	29.0337	30.2065	67.0813	41.4281	32.765	27.8829	29.2897	25.1984	26.0715	26.9685	26.7246	71.2007	34.4075	35.5853	37.7964	35.9594	38.946	44.4382	23.4232	34.4668	24.5763	24.1019	25.7034	24.8224	26.359	38.7504	30.4454	24.3766	35.1315	0	55.8025	42.9855	0	42.417	26.0646	6.49101	26.185	22.7363	20.686
SCNN1D	5.38947	3.68444	0	2.77209	6.20418	0	0.866866	1.84519	0	5.43384	10.8261	1.53778	0	1.97276	0	6.98439	5.8717	2.69983	7.96628	1.46767	2.70366	5.80356	2.37293	10.9436	0	1.75412	6.49101	0	4.0736	2.3424	6.47948	3.9512	5.35487	1.52418	6.97979	9.41211	9.0994	4.52869	0.710753	0	0	0	0	0	6.97077	6.49101	4.86068	5.68408	8.36738
ACAP3	25.0629	73.1156	19.8323	11.0883	6.20418	11.9939	19.0711	29.5231	0	33.1652	75.7829	10.5448	0	10.8502	8.19124	28.621	19.8743	9.5394	53.5914	11.6802	17.1578	36.4183	28.4752	56.6536	22.3343	19.2953	38.946	34.6983	40.736	23.7586	35.4646	100.576	96.2302	8.49187	151.913	94.2785	95.9884	74.5556	18.378	0	22.321	14.3285	0	15.9064	41.2185	58.4191	27.9097	31.2624	36.4911
PUSL1	7.27391	5.73135	0	5.54417	3.10209	4.49773	1.73373	7.38077	24.4713	4.68435	6.39725	4.17398	3.94596	1.97276	0	1.89986	2.75809	5.57965	2.89683	3.85264	1.87176	3.70026	0	7.48185	0	7.01646	0	7.30491	2.0368	1.67314	2.04479	1.97358	2.62494	2.1774	3.12038	2.94814	3.42083	1.59343	7.61521	0	0	0	0	0	6.97077	0	6.42865	2.84204	4.41612
CPSF3L	34.6466	36.2712	59.4969	18.0186	18.6126	31.4841	19.0711	40.5942	0	32.9778	46.7492	25.0439	7.89192	35.5098	49.1475	23.1264	25.1726	14.5791	28.2441	19.569	19.6535	51.7257	29.6617	39.7171	41.2325	31.5741	58.4191	24.9585	36.6624	32.7936	25.0293	26.587	27.5409	11.758	25.7021	34.7146	36.466	27.7033	25.9933	40.8203	22.321	42.9855	0	15.9064	35.1569	38.946	36.5335	19.8943	32.3074
GLTPD1	8.87298	17.1122	0	10.3953	3.10209	7.49621	6.06806	14.7615	48.9425	9.93081	6.88935	10.2153	7.89192	7.89106	8.19124	6.17798	5.44738	4.6797	25.3473	7.52182	9.46281	5.10246	2.37293	11.7253	5.15406	1.75412	12.982	3.65246	5.092	3.34629	9.68902	9.06238	9.40778	6.31447	11.0856	14.0538	13.957	9.36488	22.541	0	33.4815	0	0	0	10.6077	6.49101	15.2092	11.3682	9.52952
TAS1R3	0.812998	1.14627	0	0.693022	3.10209	0	0	0	0	0.936869	0.492097	0.219683	0	0	0	0.191353	0.240831	0	0	0.244612	0	0.817952	0	0.483901	0	0	6.49101	0	0	0.669257	0.435704	0.946515	0.871479	0	0.328461	1.1306	1.16308	0.950465	0	0	0	0	0	0	0.303077	0	4.3903	0	0.697282
DVL1	29.5264	17.0303	79.3292	6.93022	9.30628	8.99545	6.93493	25.8327	0	18.1753	27.0653	11.4235	3.94596	2.95915	0	5.16654	8.73301	1.79989	15.9326	8.80603	7.79902	10.8671	8.30527	18.5743	10.3081	10.5247	25.964	7.91366	6.1104	8.03109	9.19724	10.0854	13.7547	4.35481	9.03267	18.0848	17.241	10.2874	13.7074	40.8203	0	42.9855	0	0	15.76	12.982	29.7913	8.52612	14.6429
MXRA8	18.1498	10.1527	39.6646	6.93022	6.20418	13.4932	1.73373	208.507	24.4713	76.2611	13.2866	4.72319	0	3.94553	0	37.3685	27.6956	1.25992	100.665	3.30226	0.935882	1.67485	0	5.43458	0	0	0	2.43497	40.736	0.669257	42.6774	3.79009	2.33094	0.870961	1.6423	1.41683	1.29991	2.8514	16.2458	40.8203	11.1605	0	0	0	18.4877	77.8921	13.0141	22.7363	236.611
AURKAIP1	38.5016	42.5757	0	41.5813	24.8167	46.4765	20.8048	35.0586	24.4713	22.6722	29.0337	29.3277	67.0813	37.4825	49.1475	22.0193	33.4526	28.7982	27.5199	29.8427	27.0366	23.8374	20.1699	56.9514	20.6162	18.4182	38.946	17.6535	8.1472	7.0272	13.4723	14.528	15.3296	8.27413	14.4523	14.9935	21.346	11.9367	42.5436	244.922	78.1235	0	0	10.6043	42.7339	58.4191	71.1855	19.8943	24.6373
CCNL2	81.2836	48.9621	0	45.0464	43.4293	28.4856	38.1421	38.749	171.299	78.1349	79.2275	53.8224	27.6217	15.7821	57.3387	42.7538	49.2214	19.2588	25.3473	38.2818	45.1303	92.0001	62.8827	97.8968	48.1046	49.1152	84.3831	58.4393	99.8032	107.75	40.9475	52.4571	44.5399	38.3223	40.2364	68.3129	65.7483	38.2702	39.7006	40.8203	78.1235	28.657	0	58.3234	69.7077	71.4011	48.7636	113.682	71.5876
RP4-758J18.2	9.22833	9.82516	0	3.46511	9.30628	11.9939	6.06806	7.38077	0	5.62121	6.88935	6.48066	7.89192	8.87744	0	4.4558	6.08959	7.01956	9.4147	8.01105	5.19935	6.69941	4.74587	15.6337	3.43604	8.77058	0	1.82623	4.0736	1.33851	3.64093	4.7648	4.93488	3.70158	4.35211	4.40313	5.47332	3.718	10.4582	0	0	0	234.724	15.9064	11.2138	6.49101	14.5821	14.2102	7.90253
MRPL20	47.2131	42.9032	0	33.9581	40.3272	47.9757	41.6096	36.9038	146.828	29.2303	32.9705	36.2478	47.3515	37.4825	65.5299	31.3956	38.9918	35.6378	33.3135	41.5229	35.0436	43.4683	35.594	52.3729	39.5145	28.0658	38.946	40.177	37.6808	20.4123	20.0985	19.3331	19.2145	18.7257	19.7898	25.8654	24.4247	19.177	36.8576	0	44.642	71.6425	0	26.5106	48.1892	19.473	74.9486	28.4204	25.7994
ANKRD65	0.156139	0.327505	0	0	0	0	0	3.69038	0	0.749495	1.47629	1.97715	3.94596	0	0	1.68117	2.39685	0	3.62104	6.72683	1.66379	0	0	0.335008	0	0	0	0	0	0	0.314915	1.28887	0.587986	0	0.492691	1.66966	1.29991	0.363413	2.84301	40.8203	0	0	0	0	10.3046	0	9.87817	0	1.39456
VWA1	3.25737	2.70192	99.1615	0.693022	3.10209	2.99848	1.73373	46.1298	0	7.68233	2.95258	93.4753	0	0	8.19124	6.15064	4.92558	0.719955	20.2778	27.2131	91.6125	1.36325	4.74587	33.7614	0	1.75412	0	0.608743	3.0552	1.33851	9.33097	13.2875	6.91934	6.09673	12.4815	9.63155	6.49957	4.13732	220.74	0	11.1605	0	0	0	86.3769	103.856	20.2267	5.68408	147.591
ATAD3C	0.247668	0.409382	0	0	0	0	0	0	0	0	1.96839	0.768892	0	0	0	0.505719	1.50233	0.539966	0	9.05065	3.9515	0.2337	0	0.893355	0	0	0	1.21749	0	0.669257	0.379623	3.09329	1.29147	0.435481	0.16423	3.78297	1.77883	1.36979	3.35069	0	0	0	0	0	0	0	0.313593	0	1.16214
ATAD3B	17.396	5.32196	0	13.8604	9.30628	16.4917	14.7367	1.84519	0	9.36869	8.36564	7.24955	11.8379	27.6187	24.5737	13.4494	14.0141	11.6993	10.8631	15.2883	13.3103	44.7147	20.1699	15.8943	20.6162	20.1723	12.982	15.8273	12.2208	14.389	9.46039	8.90127	12.0222	10.6693	8.70421	18.5714	22.0985	7.21235	5.48295	0	0	0	0	5.30213	11.2138	6.49101	12.0733	17.0522	9.29709
ATAD3A	17.1322	10.9714	0	21.4837	9.30628	29.9848	12.1361	16.6067	0	9.74344	10.334	7.68892	15.7838	12.823	8.19124	11.8366	15.6024	6.65958	18.8294	11.8637	16.3259	38.9501	22.5429	15.2987	17.1802	20.1723	6.49101	9.73988	11.2024	9.3696	12.2083	10.4318	13.6077	5.22577	12.3994	16.2673	21.0723	8.94556	11.6767	0	33.4815	57.314	117.362	5.30213	17.5785	19.473	9.56457	11.3682	10.4592
TMEM240	0.97452	1.14627	0	0.693022	0	1.49924	0	1.84519	0	0.936869	0.984193	0.109842	0	0	0	0.505719	0.625015	0	0.724208	0.366918	0.207974	0.506351	0	0.223339	0	0	0	0	1.0184	0	0.798072	0.869988	0.713983	0	0.985382	0.901616	1.16308	1.03433	0.507681	0	0	0	0	0	0.606154	0	0.156796	0	0.464855
SSU72	30.0809	36.8444	0	21.4837	12.4084	31.4841	26.8728	38.749	0	19.4869	18.2076	23.8356	11.8379	37.4825	16.3825	18.8483	20.7115	21.2387	21.7262	27.58	23.0851	21.851	16.6105	29.9646	29.2063	24.5576	0	18.2623	15.276	8.36572	16.6948	16.0988	18.6266	8.05639	11.8246	25.417	27.435	15.7106	33.4054	0	44.642	28.657	117.362	10.6043	31.8231	32.455	58.3282	25.5784	16.5023
AL645728.1	0.371502	0.0818764	0	0	0	0	0	0	0	0.562121	0.492097	0.219683	0	1.97276	0	0.888426	0.980528	0.899943	0	1.0396	0	0.2337	0	0.297785	0	0	0	0	0	0	0.271776	0.487355	0.755982	0	0.328461	0.892075	1.02625	0.587052	0.101536	0	0	0	0	0	0	0	0.313593	2.84204	0
C1orf233	36.7464	13.4277	0	12.4744	9.30628	5.99697	13.003	18.4519	0	11.8046	15.7471	8.01844	0	2.95915	0	1.89986	6.60566	6.83957	15.2084	2.93534	1.45582	1.44115	2.37293	1.15392	0	2.63117	0	4.2612	4.0736	0.669257	1.87655	4.358	13.6392	3.70158	2.29923	14.755	15.1201	3.01913	2.84301	0	0	0	0	5.30213	3.33385	0	1.72476	0	8.13496
MIB2	8.67377	13.7552	0	3.46511	3.10209	4.49773	6.06806	5.53558	0	9.93081	12.3024	5.2724	11.8379	4.93191	0	6.04129	6.76048	5.75964	10.1389	5.74838	5.30333	7.43946	4.74587	11.6881	6.87208	7.01646	25.964	8.5224	10.184	7.0272	6.97126	6.03756	7.47582	2.61288	7.71883	10.4473	9.98881	6.03825	8.93518	40.8203	0	0	0	0	10.0015	12.982	25.2442	17.0522	8.13496
CDK11B	5.87404	2.45629	0	5.54417	12.4084	0	8.66866	5.53558	0	6.93283	5.41306	8.34797	7.89192	5.91829	0	7.92749	6.76622	9.17942	7.96628	6.35991	15.806	14.3726	10.6782	5.62069	8.5901	5.26235	0	3.65246	6.1104	11.0427	6.42771	6.21478	6.27885	6.09673	5.4196	8.76333	8.2784	5.31142	8.02136	0	0	14.3285	0	10.6043	3.94	0	3.91991	8.52612	5.81068
SLC35E2B	17.0676	22.8435	0	12.4744	15.5105	25.4871	8.66866	22.1423	24.4713	23.6091	27.0653	14.4991	35.5136	30.5779	0	32.2157	23.9054	14.3991	28.2441	16.5113	25.6848	27.3819	24.9158	17.4576	24.0523	12.2788	45.437	8.5224	21.3864	26.4357	22.9241	33.9819	39.2061	12.6289	24.224	47.8668	55.7595	35.1393	24.2671	0	22.321	14.3285	0	5.30213	19.0939	12.982	17.5612	17.0522	23.4752
CDK11A	8.21074	7.45075	19.8323	20.0976	18.6126	8.99545	9.53553	5.53558	24.4713	8.6192	13.7787	9.77591	31.5677	17.7549	65.5299	15.4176	16.2848	14.3991	12.3115	15.594	30.5722	21.6173	18.9835	7.33296	20.6162	7.01646	6.49101	12.1749	17.3128	8.70035	6.97989	8.43808	9.02979	9.58057	6.15864	10.2946	9.30465	6.98872	11.169	0	0	14.3285	0	0	10.3046	12.982	7.36942	8.52612	7.6701
SLC35E2	18.7797	33.4874	19.8323	14.5535	27.9188	11.9939	17.3373	18.4519	24.4713	24.7333	28.5416	16.2566	11.8379	16.7685	57.3387	24.6846	21.5143	7.9195	18.1052	18.4071	18.3017	35.5225	32.0346	19.1327	39.5145	15.787	32.455	18.2623	25.46	18.0699	25.465	39.0367	48.6664	13.7176	25.3736	49.8465	60.4118	41.0936	16.6519	0	0	28.657	0	15.9064	19.3969	19.473	15.366	14.2102	24.8697
NADK	24.6914	6.63199	0	9.70231	6.20418	2.99848	14.7367	1.84519	24.4713	12.9288	11.8103	7.35939	23.6758	8.87744	16.3825	7.47644	7.87863	15.479	9.4147	14.8602	9.04686	28.901	14.2376	22.0733	22.3343	7.01646	6.49101	49.3082	5.092	8.36572	10.129	7.37879	8.90379	11.1048	8.29364	14.3829	14.9832	7.01667	4.97527	0	11.1605	0	0	15.9064	8.48616	6.49101	8.93739	11.3682	4.41612
GNB1	227.435	421.336	237.988	133.753	276.086	277.36	365.817	306.302	440.483	269.631	289.845	350.725	106.541	307.751	253.929	289.627	305.34	345.038	268.681	208.654	485.515	255.006	339.329	185.185	487.918	307.847	201.221	354.288	359.495	440.706	291.055	468.086	389.32	369.07	329.118	551.651	457.228	483.256	434.473	122.461	424.099	157.614	234.724	286.315	234.279	194.73	208.539	244.415	227.081
TMEM52	6.16478	2.7838	0	0.693022	0	0	1.73373	0	0	2.24849	0.492097	1.3181	0	0	0	0.0273362	0.378449	0	0	0.183459	0.311961	0.779001	0	1.89838	0	0	6.49101	0.608743	2.0368	0.334629	0.35374	0.757212	0.472489	0	0.246346	2.12762	7.18374	0.307503	0.203072	0	0	0	0	10.6043	3.33385	0	111.953	2.84204	2.32427
C1orf222	12.4696	0.409382	0	0.693022	3.10209	0	3.46746	1.84519	0	1.49899	1.47629	5.2724	0	0	0	1.2438	2.60327	3.05981	1.44842	1.9569	0.831895	0.506351	0	0.893355	0	0	0	0.608743	0	2.3424	2.69619	0.729018	0.577486	1.30644	0.739037	1.15445	2.53141	0.615007	0.507681	0	0	0	0	0	0	6.49101	0.313593	0	0.697282
GABRD	0.866839	0.655011	0	0	0	0	0	0	0	6.55808	0	4.28383	0	0	0	0.410043	0.120416	0	0	0.122306	3.22359	0	0	0.111669	0	0	0	0.608743	0	0	0.918861	1.09554	1.00798	0.21774	0.0821152	1.84617	0.752582	1.9848	1.52304	0	0	0	0	0	0	0	0.313593	5.68408	0
PRKCZ	16.863	31.6862	277.652	4.15813	9.30628	1.49924	5.2012	1.84519	48.9425	5.62121	53.1464	21.1994	0	18.7413	0	3.18466	33.6304	5.03968	5.79366	49.8397	15.0781	1.9475	10.6782	52.224	8.5901	1.75412	51.928	1.82623	3.0552	46.848	6.75557	38.3439	47.0494	1.74192	26.359	62.4643	59.2487	43.7214	3.14762	0	33.4815	0	0	5.30213	3.63692	6.49101	11.1325	0	7.20525
C1orf86	26.732	30.1305	39.6646	15.2465	34.123	28.4856	19.0711	51.6654	0	24.546	28.5416	20.101	19.7298	25.6459	57.3387	30.0288	19.6278	17.8189	20.2778	20.5474	20.0695	10.5165	11.8647	34.4314	5.15406	24.5576	25.964	10.9574	28.5152	10.7081	18.4721	17.8791	14.9096	10.4515	17.9011	24.129	24.63	13.3904	31.1716	0	22.321	0	0	21.2085	29.3985	32.455	35.7496	42.6306	26.7291
AL590822.2	0.409191	1.14627	0	0	0	0	0.866866	0	0	0.374748	1.47629	0	0	0	0	0.314366	0.166288	0	0	0.366918	0.103987	0.19475	0	1.15392	0	0	0	0.608743	0	0	0.215695	0.338329	0.503988	0	0.16423	0.605848	0.478916	0.419323	0.304608	0	0	0	0	0	0.303077	0	0.940778	0	0.464855
AL590822.1	0.651475	0.573135	0	0	0	1.49924	0	0	0	1.31162	1.47629	1.53778	0	0.986382	0	0.984102	0.797037	0	0	0.366918	2.49569	0.0389501	0	0.297785	0	1.75412	0	0	4.0736	1.33851	0.427076	0.249719	0.167996	0.21774	0.246346	0.491357	0.684165	0.475233	0.304608	0	0	0	0	0	0.303077	0	0.470389	0	1.39456
SKI	21.0679	52.4827	59.4969	29.7999	24.8167	46.4765	57.2132	90.4144	73.4138	96.1228	50.6859	63.3787	7.89192	87.788	139.251	104.151	52.0712	43.7372	129.633	56.3219	91.3005	55.6597	27.2887	64.3588	22.3343	54.3776	110.347	38.9595	90.6376	50.1943	76.4768	55.208	51.0288	132.386	48.448	95.5427	43.7182	47.9426	122.148	0	55.8025	100.3	117.362	37.1149	100.318	116.838	90.3147	125.05	136.667
MORN1	4.35035	5.48572	0	9.00928	0	5.99697	1.73373	9.22596	0	6.55808	9.34983	3.07557	19.7298	2.95915	8.19124	10.9071	17.8903	4.85969	7.96628	20.8532	6.86314	14.9958	9.49173	8.63576	1.71802	0.877058	25.964	10.9574	4.0736	4.35017	14.9692	7.45532	6.99283	5.44351	4.76268	14.3304	11.494	11.741	3.95991	0	0	0	0	0	10.3046	6.49101	7.21263	5.68408	8.59981
RER1	62.5093	51.009	59.4969	45.0464	21.7146	82.4583	40.7427	40.5942	24.4713	37.1	52.1622	39.3233	39.4596	20.714	8.19124	15.5133	15.8662	19.6188	46.3493	23.6662	23.0851	40.1575	30.8481	43.2533	30.9244	25.4347	58.4191	24.3497	32.5888	22.7547	30.2491	23.0909	24.1809	23.2982	29.3972	29.4289	31.2664	19.4845	42.239	40.8203	11.1605	57.314	0	15.9064	42.7339	38.946	42.335	39.7885	62.9878
PEX10	22.1825	12.1996	19.8323	9.00928	27.9188	10.4947	13.8699	12.9163	0	12.554	12.7945	10.9842	0	1.97276	24.5737	8.66557	10.3385	7.55952	9.4147	12.5975	7.69503	8.53007	10.6782	17.7554	6.87208	7.01646	0	4.2612	3.0552	2.67703	13.8735	7.34254	7.64382	6.96769	9.44325	13.6006	15.3937	7.12849	10.9659	0	0	0	0	0	14.8508	19.473	16.4636	8.52612	10.4592
PLCH2	0.32843	1.63753	0	0	3.10209	0	0	0	0	0.562121	27.5574	0.219683	0	0.986382	0	0.341702	0.258034	0.359977	1.44842	5.50377	0	0.467401	1.18647	1.11669	3.43604	0	6.49101	0	23.4232	0.334629	2.38559	14.8099	5.60687	0.21774	3.69518	19.5684	16.7621	3.52231	1.82765	0	0	0	0	10.6043	0.909231	0	0.783981	2.84204	0.232427
PANK4	6.86472	7.12324	0	6.2372	3.10209	7.49621	2.6006	9.22596	0	6.93283	10.8261	8.23813	7.89192	10.8502	0	4.5378	5.05173	2.15986	5.79366	3.85264	7.59105	8.29637	3.5594	5.24846	10.3081	9.64763	6.49101	2.43497	4.0736	4.6848	4.35273	5.09104	5.53337	5.00803	5.25537	7.5898	8.89415	4.41687	11.7782	0	11.1605	14.3285	0	0	8.18308	45.437	10.5054	5.68408	5.81068
HES5	0.285357	0.409382	0	1.38604	0	1.49924	0.866866	7.38077	0	0.749495	0.492097	0.109842	0	0	0	0.205021	0.166288	0	0	0.183459	0.519935	0.817952	1.18647	0.967801	0	0	0	1.21749	0	2.00777	84.2591	2.97649	3.83241	0.653221	73.9858	3.87361	2.53141	3.69004	6.59985	0	0	0	0	0	0	6.49101	1.41117	0	0
TNFRSF14	2.45515	0.655011	0	4.15813	27.9188	50.9742	30.3403	5.53558	0	8.24445	4.42887	18.4534	0	34.5234	16.3825	1.50349	0.550472	12.2392	2.17262	4.83109	10.9186	1.7138	7.1188	10.1619	6.87208	57.0087	0	29.2197	11.2024	29.1127	0.603946	0.209442	0.125997	16.1128	0.328461	0.343473	0.342083	0.0279549	20.8149	40.8203	33.4815	71.6425	0	26.5106	0.606154	12.982	1.09757	5.68408	10.9241
FAM213B	17.4875	43.6401	19.8323	16.6325	31.0209	22.4886	11.2693	31.3683	24.4713	11.6172	48.7176	21.529	27.6217	13.8094	0	9.82735	12.5863	5.39966	18.8294	26.6627	20.3814	12.3861	1.18647	11.6881	5.15406	12.2788	32.455	3.65246	5.092	6.02332	16.5783	10.1257	8.02181	3.2661	8.37575	11.0627	22.167	5.08779	42.6452	0	11.1605	0	0	15.9064	15.76	71.4011	19.5995	19.8943	14.6429
MMEL1	1.65292	1.7194	0	0	0	2.99848	0.866866	0	0	0.749495	1.96839	0.988575	0	0	0	0.464715	0.326843	0.539966	0.724208	2.69073	0.519935	0.623201	1.18647	0.558347	0	0.877058	6.49101	0	0	0.334629	0.487471	0.358467	0.367491	0	0.328461	1.1783	3.14716	0.391368	0.812289	0	0	0	0	0	0.303077	0	1.09757	0	0.697282
TTC34	2.21286	0.573135	0	1.38604	0	4.49773	0.866866	1.84519	24.4713	1.49899	12.7945	0.439367	0	4.93191	0	1.77685	1.88651	1.6199	0	4.52532	1.03987	0.740051	0	2.9034	0	0.877058	0	2.43497	2.0368	2.00777	3.81349	2.75496	3.32842	1.0887	3.94153	4.63211	4.92599	3.57822	0.609217	0	0	0	0	0	0.303077	0	1.72476	0	0.929709
PRDM16	0.689164	0.655011	19.8323	0.693022	0	1.49924	0.866866	94.1048	0	4.3096	3.44468	0.768892	0	4.93191	8.19124	6.13697	10.6138	0.179989	2.89683	135.576	3.63954	1.2464	39.1534	6.81183	0	0.877058	0	0.608743	2.0368	2.3424	38.8208	1.04318	0.86098	0.653221	3.36672	1.28802	1.2315	1.20206	1.31997	0	0	14.3285	0	0	2.12154	58.4191	4.0767	8.52612	1.39456
MEGF6	1.1845	1.14627	0	1.38604	6.20418	2.99848	5.2012	119.937	0	37.4748	1.96839	5.05272	0	12.823	16.3825	16.4564	5.32696	5.21967	38.383	5.32031	7.79902	1.0906	40.3399	2.12172	37.7964	0.877058	259.64	1.82623	35.644	10.7081	40.115	2.45288	2.30995	3.2661	1.80653	12.0597	12.5202	5.70279	73.9183	0	100.445	0	0	0	0.909231	38.946	6.58544	11.3682	8.83224
TPRG1L	17.649	16.0478	0	24.2558	18.6126	25.4871	18.2042	12.9163	0	12.7414	31.0021	17.355	27.6217	9.86382	16.3825	7.85915	6.55405	7.9195	10.8631	10.0291	5.40732	9.77647	9.49173	35.8831	5.15406	7.01646	25.964	6.08743	6.1104	4.01554	5.45277	6.43227	6.23685	6.74995	3.20249	13.8534	14.6411	7.60372	17.4642	0	22.321	28.657	0	0	7.57692	12.982	25.2442	14.2102	11.8538
WRAP73	5.80943	5.97697	0	6.93022	9.30628	10.4947	6.06806	16.6067	0	5.80859	8.85774	5.60193	23.6758	9.86382	0	4.41479	5.86596	3.59977	7.24208	5.32031	8.31895	11.4124	8.30527	5.62069	6.87208	6.1394	0	7.30491	4.0736	10.3735	6.25516	6.19061	6.19485	6.74995	6.65133	11.535	9.57831	3.88573	9.03672	81.6407	0	14.3285	0	5.30213	9.39539	19.473	5.80146	2.84204	10.6917
TP73	0.753773	0.327505	0	0.693022	0	1.49924	0.866866	1.84519	24.4713	1.49899	1.96839	0.219683	7.89192	0.986382	0	1.95454	1.0436	0.899943	0.724208	0.733836	1.03987	3.38866	1.18647	1.34003	3.43604	0.877058	0	0	3.0552	1.33851	1.06122	1.50637	0.556487	0	0.903267	0.801437	1.02625	0.587052	2.63994	0	0	0	0	0	6.97077	0	1.72476	0	0.697282
CCDC27	0.344582	0.163753	0	0	0	0	0.866866	0	0	0	0	0.109842	0	0	0	0.35537	0.378449	0.359977	0.724208	0.794989	0	0.817952	0	0.781686	1.71802	0	0	0	0	0	0.284717	0.326246	0.262494	0	0.246346	0.376866	0.752582	0.139774	0.101536	0	0	0	0	0	0.303077	0	0.156796	0	0.464855
SMIM1	4.52802	1.80128	0	49.2045	0	28.4856	1.73373	0	0	2.24849	10.8261	1.75747	173.622	0	8.19124	0.710741	1.23856	1.07993	1.44842	1.16191	0.311961	24.4217	13.0511	39.866	6.87208	15.787	6.49101	10.9574	11.2024	4.6848	0.138045	0.120832	0.041999	0	0.0821152	0.10972	0.0684165	0.0838646	0.507681	40.8203	11.1605	0	0	0	0.606154	0	3.91991	2.84204	0
LRRC47	18.6505	28.6567	19.8323	18.0186	18.6126	23.9879	18.2042	31.3683	0	15.552	30.0179	17.2451	11.8379	6.90468	0	12.684	15.6426	9.71939	14.4842	15.8386	10.0867	24.7333	8.30527	21.4405	15.4622	20.1723	25.964	11.5661	13.2392	7.0272	15.1547	16.8842	21.01	7.83865	16.1767	23.9381	24.2879	17.7234	20.8149	0	11.1605	14.3285	0	15.9064	32.7323	6.49101	37.1607	14.2102	23.7076
CEP104	34.8728	31.6043	0	20.0976	37.2251	37.481	34.6746	18.4519	73.4138	24.546	39.8598	24.1652	27.6217	34.5234	0	21.8553	26.6176	21.4186	23.8989	27.6412	28.3884	37.8205	24.9158	34.8781	51.5406	61.394	51.928	31.6546	27.4968	29.4473	28.9118	47.2049	54.1577	22.4272	43.3568	82.3715	75.1214	48.1383	33.2023	0	11.1605	14.3285	117.362	47.7192	33.6415	0	18.502	17.0522	23.94
DFFB	2.95587	3.19318	0	3.46511	3.10209	8.99545	6.06806	3.69038	24.4713	4.3096	3.44468	2.52636	0	0	8.19124	2.85663	1.88651	1.43991	2.17262	1.77344	2.3917	7.98477	11.8647	4.504	15.4622	16.6641	12.982	5.47868	6.1104	3.34629	2.89463	4.23314	6.15285	3.70158	4.43422	12.7848	12.7255	3.63413	2.63994	0	11.1605	0	0	0	3.94	6.49101	1.41117	0	3.02156
C1orf174	5.96557	8.10576	19.8323	10.3953	6.20418	25.4871	6.93493	3.69038	48.9425	7.12021	2.95258	6.70034	0	7.89106	0	2.99331	5.06893	1.6199	5.79366	5.44262	3.22359	8.41322	2.37293	4.95068	8.5901	6.1394	19.473	4.86994	3.0552	3.34629	4.46489	3.58065	3.69591	1.52418	4.76268	4.85632	7.11532	3.60618	6.59985	0	33.4815	0	117.362	10.6043	10.6077	6.49101	9.56457	8.52612	9.06467
AJAP1	1.14681	2.37441	19.8323	0	0	1.49924	1.73373	20.2971	0	2.62323	11.3182	2.74604	0	0	0	1.38048	3.27416	0.179989	21.002	1.52883	25.5808	0.701101	2.37293	1.78671	3.43604	0.877058	0	3.65246	1.0184	0.669257	4.05938	4.08814	128.181	2.39514	56.2489	70.5646	33.2504	42.0162	38.4822	40.8203	11.1605	0	0	10.6043	5.75846	6.49101	3.29272	19.8943	4.88097
NPHP4	20.7934	21.206	0	4.85115	9.30628	8.99545	21.6716	20.2971	122.356	15.3647	21.1602	10.2153	3.94596	5.91829	8.19124	9.74535	25.035	10.2594	13.0357	14.1263	13.6223	17.4496	15.4241	35.6598	13.7442	9.64763	6.49101	24.3497	9.1656	17.0661	34.6191	31.3921	41.5265	15.0241	17.819	64.487	49.3283	37.6272	13.5043	0	22.321	0	0	42.417	9.09231	0	3.76311	34.1045	9.29709
KCNAB2	8.78145	19.0772	0	6.93022	77.5523	8.99545	73.6836	16.6067	24.4713	4.87172	19.6839	6.26098	0	95.6791	0	7.29876	7.52885	64.4359	6.51787	4.15841	13.7263	6.54361	100.85	3.31286	65.2848	16.6641	12.982	68.7879	9.1656	7.69646	11.1514	24.4201	19.0361	49.8625	10.1823	50.7052	62.6695	24.6003	8.32596	0	0	71.6425	0	63.6256	6.66769	0	2.35194	5.68408	14.6429
CHD5	0.769925	26.1186	0	1.38604	0	0	0.866866	5.53558	0	0.749495	9.34983	0.439367	0	0	0	0.724409	0.619281	0	1.44842	0.917295	0.623922	1.28535	1.18647	1.9356	0	1.75412	0	1.82623	1.0184	0.334629	3.93428	19.752	26.9844	3.2661	3.94153	86.994	112.408	29.1569	4.06145	0	0	0	0	0	0.303077	0	0.627185	0	0.697282
RPL22	56.7106	79.5838	39.6646	40.8883	71.3481	59.9697	32.074	55.3558	0	42.9086	54.1306	36.9068	15.7838	84.8289	90.1037	64.8004	58.7973	41.2174	81.8355	79.0097	39.0991	32.4844	41.5263	52.3729	32.6424	24.5576	129.82	22.5235	20.368	14.389	29.1059	38.2795	27.6458	13.4999	18.4759	41.0784	30.7874	26.1937	47.0112	163.281	44.642	28.657	0	63.6256	106.683	110.347	206.187	65.3669	41.8369
RNF207	3.45659	4.33945	19.8323	0.693022	0	0	1.73373	0	0	11.9919	3.44468	2.08699	7.89192	4.93191	0	12.9847	4.68474	0.179989	13.7599	26.4181	3.11961	1.20745	2.37293	20.6588	3.43604	0.877058	12.982	0	0	0.669257	1.53143	2.56969	2.16295	0.870961	2.54557	13.4527	9.71515	2.12457	0.812289	0	0	0	0	0	1.51538	0	17.718	0	12.0862
ICMT	65.3521	59.7697	39.6646	47.1255	24.8167	31.4841	52.012	64.5817	24.4713	55.65	53.6385	42.9481	15.7838	31.5642	0	17.4952	21.3537	13.8591	49.9703	19.6301	18.8216	40.547	15.4241	25.7584	20.6162	12.2788	25.964	15.2186	18.3312	9.03497	23.4245	11.6119	13.1037	13.4999	22.2532	23.0985	23.1932	10.539	57.8756	0	33.4815	0	0	21.2085	54.5539	64.9101	38.1015	59.6828	77.6307
GPR153	2.08903	31.9318	0	1.38604	0	0	0.866866	25.8327	0	12.9288	15.7471	0.219683	0	3.94553	0	16.5657	5.79716	1.97988	21.7262	4.09725	0.519935	0.506351	1.18647	1.9356	0	0	0	2.43497	16.2944	0	27.1172	17.8831	15.8546	2.61288	29.3972	37.0235	38.5869	14.6763	13.0982	0	0	14.3285	0	0	38.7939	19.473	21.1675	31.2624	16.2699
ACOT7	15.5223	109.223	0	32.572	9.30628	32.9833	14.7367	46.1298	0	12.7414	23.6206	9.99559	0	38.4689	32.765	10.9481	31.4228	18.5388	26.0715	17.979	19.1336	54.0238	34.4075	33.0541	24.0523	17.5412	19.473	12.1749	10.184	15.0583	32.475	74.4041	64.6575	10.0161	53.3749	122.854	182.809	54.8474	30.2578	0	22.321	0	0	37.1149	49.7046	6.49101	18.0316	14.2102	15.3402
HES2	0.0861454	0.0818764	19.8323	0.693022	0	0	0	0	0	0.187374	0	0	0	0	0	0.35537	1.45646	0	0	0.428071	0.727908	0.311601	0	0.223339	0	0	0	0	0	0.334629	0.220009	0.201386	0.178496	0	0.246346	1.25463	0.342083	0.223639	0.101536	0	0	0	0	0	0	0	0	0	0
ESPN	1.2168	1.06439	0	124.051	0	2.99848	0	3.69038	0	2.62323	2.46048	0.768892	228.866	0	0	0.820085	8.85342	2.15986	1.44842	4.58648	1.24784	186.026	30.8481	113.196	30.9244	16.6641	0	15.2186	13.2392	7.0272	8.63212	0.588048	0.797981	1.74192	0.410576	1.50746	1.29991	0.97842	1.31997	40.8203	0	0	0	0	0.606154	0	1.41117	0	0.697282
TNFRSF25	2.74589	8.76077	0	4.15813	21.7146	4.49773	13.8699	14.7615	0	2.43586	39.3677	14.4991	0	22.6868	8.19124	6.41033	8.90503	13.3192	2.17262	5.13685	25.2688	7.16681	8.30527	3.0523	10.3081	2.63117	12.982	19.4798	1.0184	19.0738	3.27425	2.20719	3.10793	12.8467	1.88865	27.2679	38.0396	3.99755	14.5197	0	44.642	14.3285	0	26.5106	3.03077	12.982	3.29272	8.52612	2.09185
PLEKHG5	3.96269	11.1352	0	1.38604	0	0	46.8108	18.4519	0	3.37273	41.8282	16.6959	0	4.93191	16.3825	11.9459	13.8019	50.9368	7.24208	8.92834	38.2672	0.623201	2.37293	2.94063	3.43604	0	19.473	49.3082	10.184	26.7703	4.50803	2.90399	3.89541	35.7094	5.00903	24.1337	29.0086	4.86415	22.1349	0	33.4815	0	0	68.9277	6.66769	6.49101	4.86068	5.68408	1.62699
NOL9	29.0149	39.71	39.6646	24.2558	6.20418	31.4841	15.6036	27.6779	24.4713	29.2303	36.4151	29.8769	11.8379	23.6732	32.765	31.915	33.7565	13.3192	29.6925	27.3354	30.3642	48.5318	43.8993	32.533	22.3343	17.5412	6.49101	32.8721	32.5888	34.8014	35.3093	33.0314	40.6865	19.3789	32.0249	45.2669	46.5232	36.3693	31.3747	0	11.1605	14.3285	0	26.5106	37.8846	38.946	39.8263	25.5784	25.1022
TAS1R1	0.366118	0.245629	0	0	0	0	0.866866	0	0	0.749495	0.492097	0.109842	0	0.986382	0	0.738077	0.521801	0.359977	0	1.28421	0.935882	0.389501	0	0.632793	0	0.877058	6.49101	0	0	0.334629	0.470215	0.571937	0.43049	0.653221	0.16423	0.806207	1.36833	0.391368	0.304608	0	0	0	0	0	2.42462	0	14.1117	0	0.929709
ZBTB48	21.531	9.74329	0	10.3953	3.10209	7.49621	13.003	12.9163	48.9425	9.36869	13.7787	7.35939	3.94596	2.95915	0	7.85915	9.58738	14.7591	13.7599	8.0722	6.03124	13.0093	22.5429	26.3912	8.5901	15.787	32.455	22.5235	14.2576	8.70035	10.5087	8.98585	9.15578	10.4515	9.52536	16.7157	15.7358	8.63805	8.12289	0	11.1605	0	117.362	31.8128	10.3046	6.49101	12.0733	5.68408	9.76195
KLHL21	23.8946	13.1821	0	27.0278	3.10209	17.9909	6.93493	23.9875	24.4713	19.1121	10.334	5.38224	0	12.823	40.9562	11.5495	11.881	7.01956	15.9326	6.72683	4.36745	16.4369	3.5594	22.0361	1.71802	15.787	6.49101	12.7836	12.2208	4.35017	11.2593	4.96216	5.39687	3.91932	8.78633	9.54568	7.0469	4.55664	5.78756	0	22.321	14.3285	0	0	23.64	51.928	90.785	31.2624	19.059
PHF13	9.77751	19.1591	19.8323	12.4744	6.20418	11.9939	7.80179	9.22596	24.4713	12.7414	16.2392	6.26098	11.8379	3.94553	8.19124	15.0759	14.7939	3.41978	22.4504	12.1695	6.13523	8.76377	8.30527	10.683	1.71802	1.75412	6.49101	4.86994	4.0736	2.3424	11.1212	7.12907	6.24735	2.83062	8.04729	13.8916	12.5886	5.98234	11.4736	0	22.321	28.657	0	0	21.5185	0	21.3243	14.2102	21.1509
THAP3	10.2675	12.0358	19.8323	9.70231	3.10209	7.49621	7.80179	11.0712	24.4713	7.8697	8.85774	7.24955	19.7298	6.90468	8.19124	8.9526	9.26054	4.6797	5.79366	4.70878	6.44719	9.34802	3.5594	7.92853	10.3081	5.26235	0	6.08743	7.1288	4.6848	8.23092	8.10781	10.7622	3.70158	8.1294	11.9023	11.494	8.58214	11.5751	0	22.321	14.3285	0	5.30213	11.5169	32.455	14.4253	0	7.90253
DNAJC11	68.8464	40.4469	118.994	50.5906	34.123	38.9803	32.9409	23.9875	97.885	39.3485	39.8598	30.8655	74.9732	21.7004	16.3825	45.9111	57.1057	30.4181	31.8651	40.6668	47.2101	126.938	64.0692	65.8477	39.5145	53.5005	84.3831	64.5267	57.0304	60.9024	42.9104	42.9637	48.1729	38.9755	44.5064	72.6731	69.1007	42.8828	30.867	0	22.321	28.657	0	26.5106	38.7939	77.8921	32.6136	28.4204	29.5183
CAMTA1	220.522	545.788	198.323	41.5813	111.675	127.436	91.0209	71.9625	293.655	85.8172	435.505	104.459	23.6758	50.3055	81.9124	103.153	194.661	70.9155	47.7977	121.939	145.27	80.6656	110.341	106.458	97.9271	263.994	116.838	59.6568	120.171	110.762	485.995	598.576	712.923	79.6929	403.596	866.911	754.498	572.599	139.206	0	89.284	114.628	0	95.4383	62.7369	103.856	95.6457	88.1032	58.5717
VAMP3	49.5929	33.9787	79.3292	16.6325	15.5105	37.481	33.8078	70.1173	0	38.0369	46.2571	49.0992	15.7838	9.86382	0	18.4929	22.2081	27.1783	31.8651	25.1339	33.2758	11.4124	8.30527	17.2343	15.4622	18.4182	25.964	16.4361	18.3312	15.7275	15.7414	9.75112	9.68077	10.6693	10.675	17.956	16.5568	10.3713	84.275	0	122.766	0	0	10.6043	30.9139	25.964	56.1331	28.4204	25.567
PER3	20.4057	22.1066	59.4969	3.46511	18.6126	32.9833	32.074	18.4519	24.4713	14.9899	102.848	5.71177	7.89192	4.93191	8.19124	15.65	21.8985	20.1587	14.4842	15.0436	14.4542	4.63506	10.6782	41.206	1.71802	14.0329	12.982	43.2207	11.2024	22.0855	22.4409	15.1765	15.3086	52.6931	13.6311	41.4887	16.2831	11.126	17.0581	0	33.4815	0	0	53.0213	8.78923	32.455	16.15	11.3682	9.29709
UTS2	5.94404	1.88316	0	1.38604	0	5.99697	3.46746	1.84519	0	2.06111	1.96839	1.75747	3.94596	0	0	0.273362	0.263768	0.539966	0	0.550377	0.103987	0.1558	0	0.744462	0	0	0	0.608743	0	0	0.323543	0.281941	0.230995	1.0887	0.246346	0.510439	0.0684165	0.223639	0.101536	0	0	0	0	0	0.303077	0	0.313593	0	0.464855
TNFRSF9	0.0699932	0	0	0	0	0	0.866866	0	0	0	0	0	0	1.97276	0	0.136681	0.217895	0.179989	0	0.183459	0.415948	0.0389501	0	0.260562	0	1.75412	0	0	0	0.334629	0.138045	0.169164	0.115497	0	0	0.233752	0.478916	0.139774	0.203072	0	0	0	0	0	0	0	0	0	0
PARK7	112	122.733	79.3292	83.1626	124.084	112.443	76.2842	143.925	24.4713	90.8763	114.658	81.173	55.2434	78.9106	65.5299	58.144	54.1068	38.8775	78.2144	50.3289	44.9223	50.2845	45.0857	78.8014	44.6685	57.8858	123.329	42.612	42.7728	24.7625	56.249	54.9059	58.4416	26.7821	51.2399	60.5371	70.5374	46.3492	97.5762	122.461	189.729	85.971	0	42.417	116.685	116.838	185.02	79.5771	75.5389
ERRFI1	16.863	10.8896	198.323	3.46511	3.10209	0	2.6006	0	0	28.8556	17.7155	6.37082	0	0	16.3825	7.42177	17.9821	0.539966	66.6271	94.8483	4.26346	5.84251	3.5594	320.454	6.87208	8.77058	32.455	9.13114	14.2576	7.0272	9.45176	12.1678	17.4086	1.74192	15.4377	22.4498	13.2044	14.9838	4.26452	0	22.321	0	0	0	3.03077	0	5.64467	22.7363	4.88097
SLC45A1	1.24911	6.30448	0	0	0	0	0	0	0	2.06111	7.87354	6.04129	0	0	0	1.69484	1.98973	0.539966	0.724208	0.489224	1.87176	0.389501	0	0.967801	0	0	0	1.21749	3.0552	0.334629	6.53556	13.8111	17.5661	0.21774	13.6311	18.829	25.793	12.5238	2.5384	0	0	0	0	0	0.909231	0	0.783981	8.52612	1.16214
RERE	594.42	370.081	634.634	358.292	282.29	145.426	367.551	282.314	489.425	428.337	520.638	592.486	599.786	305.779	622.534	706.216	913.267	410.554	370.794	716.041	855.188	512.466	876.799	576.065	668.31	460.455	512.789	474.819	1079.5	1080.52	733.009	1110.8	992.227	559.593	935.538	642.189	893.178	1374.23	461.99	81.6407	569.186	214.928	234.724	402.962	423.702	395.951	312.495	338.203	331.441
ENO1	216.064	178.163	158.658	130.981	186.126	379.308	179.441	147.615	171.299	95.5606	107.769	98.4182	63.1354	291.969	122.869	62.4222	107.623	156.23	111.528	212.874	67.4875	43.9357	149.495	103.406	73.8749	113.14	110.347	65.7442	43.7912	34.4668	225.164	105.571	114.227	98.2009	102.48	69.3004	79.6368	67.8185	140.729	40.8203	167.408	100.3	586.81	111.345	211.548	149.293	193.487	105.155	108.311
CA6	0.393039	0.491258	0	0	0	1.49924	0.866866	0	0	0	0	0.219683	0	0	0	0.724409	0.699558	0.359977	0.724208	0.061153	0.519935	0.350551	0	0.223339	1.71802	0	0	0	1.0184	0.669257	0.45296	0.499438	0.608986	0.435481	0.246346	0.968403	0.273666	0.615007	0.304608	0	0	0	0	0	0.606154	0	0.156796	2.84204	0.697282
SLC2A7	0.452264	0.163753	0	0.693022	0	0	0	0	0	0.749495	0	0.439367	7.89192	5.91829	0	1.51716	1.2959	0.899943	0.724208	1.10075	2.28771	0.545301	1.18647	0.670016	3.43604	0	0	0.608743	0	0	0.50904	1.14387	0.461989	0.21774	0.246346	0.644012	0.889415	0.894556	0.609217	0	0	0	0	0	0	0	0	0	0
SLC2A5	0.506104	0.655011	0	0.693022	0	1.49924	5.2012	0	0	1.12424	0.984193	0.768892	0	5.91829	0	1.33947	0.951857	2.87982	0	2.32381	0.519935	0.779001	29.6617	1.22836	10.3081	2.63117	0	0.608743	2.0368	2.3424	1.15613	0.958598	0.808481	47.6851	0.903267	1.72691	1.84725	0.894556	0.609217	0	0	0	0	5.30213	0.606154	0	7.36942	0	2.09185
GPR157	11.0212	1.55565	39.6646	0	3.10209	0	4.33433	7.38077	24.4713	3.18535	0.492097	2.74604	0	0.986382	0	3.22567	2.26496	2.87982	2.89683	10.2737	2.07974	0.779001	2.37293	11.3531	1.71802	1.75412	0	1.82623	0	1.00389	0.677282	0.54777	0.608986	1.0887	1.47807	2.39	3.48924	0.307503	2.13226	0	0	0	0	0	1.51538	19.473	2.50874	0	1.85942
H6PD	51.8003	24.5629	19.8323	20.0976	58.9398	11.9939	30.3403	84.8788	24.4713	68.5788	23.6206	28.2293	3.94596	27.6187	0	80.054	42.048	21.9586	120.943	47.3936	45.7542	9.65962	22.5429	117.886	25.7703	7.01646	123.329	34.6983	38.6992	13.7198	42.3064	16.8842	13.8177	26.5643	29.233	21.0186	29.2823	15.0118	38.1776	0	44.642	28.657	0	42.417	77.5877	97.3651	34.3384	48.3147	171.299
SPSB1	2.64359	11.8721	0	0	0	11.9939	0	11.0712	0	17.9879	4.92097	11.7531	0	4.93191	57.3387	24.2609	15.568	2.69983	62.2819	24.6447	38.5791	0.623201	1.18647	20.1377	8.5901	24.5576	19.473	0.608743	4.0736	16.0622	4.94373	1.95747	10.8777	1.52418	27.3444	3.12942	7.79948	1.81707	33.1008	0	33.4815	0	0	0	1.81846	12.982	2.66554	11.3682	54.1556
SLC25A33	40.1007	15.6384	59.4969	20.7907	0	29.9848	30.3403	27.6779	48.9425	13.8657	19.6839	11.7531	3.94596	40.4417	16.3825	49.3418	57.2548	68.0357	43.4525	63.2322	23.2931	41.6376	40.3399	106.681	25.7703	24.5576	19.473	38.9595	13.2392	19.0738	21.1209	22.8412	34.7752	33.7497	30.3826	33.9132	41.5288	15.1236	9.64593	0	0	14.3285	0	15.9064	11.5169	6.49101	6.42865	17.0522	11.8538
TMEM201	7.64002	19.8141	19.8323	2.07907	3.10209	19.4901	6.93493	18.4519	97.885	6.74546	17.7155	9.55623	0	3.94553	16.3825	7.10741	9.26054	7.19955	3.62104	5.50377	7.48706	10.7502	11.8647	5.36013	6.87208	8.77058	6.49101	4.2612	14.2576	5.68869	13.4421	11.4226	13.8807	5.22577	18.7223	7.82832	12.2466	10.3433	12.1843	0	0	42.9855	0	0	39.4	12.982	14.1117	8.52612	8.59981
PIK3CD	4.15113	14.9834	0	6.2372	120.982	1.49924	156.036	1.84519	0	2.99798	7.38145	2.96573	0	162.753	49.1475	5.97295	6.40497	169.369	5.79366	5.80954	3.32758	3.89501	147.122	6.62572	365.938	7.01646	71.4011	362.202	6.1104	13.7198	8.12739	12.063	5.56487	167.007	3.03826	7.68997	54.5964	7.32417	22.6426	0	0	114.628	0	137.855	2.12154	19.473	5.17428	2.84204	3.48641
CLSTN1	103.375	164.08	39.6646	22.1767	80.6544	38.9803	97.9559	175.293	122.356	108.115	154.518	136.753	7.89192	59.1829	49.1475	105.094	124.475	84.2347	142.669	71.0598	104.091	20.1372	109.155	42.2855	113.389	51.7464	149.293	112.617	109.987	108.754	198.659	240	357.055	116.273	247.167	100.118	250.883	224.533	214.14	0	66.963	28.657	117.362	68.9277	114.26	162.275	65.2272	139.26	143.64
CTNNBIP1	17.0353	49.1258	19.8323	11.0883	15.5105	31.4841	26.006	27.6779	0	22.4849	28.5416	26.8014	0	31.5642	16.3825	43.1638	41.6466	30.4181	46.3493	30.8211	34.9396	21.5394	48.6451	49.7301	37.7964	58.7629	71.4011	46.2644	23.4232	37.813	46.2795	64.6852	49.6743	23.7337	48.2837	33.6556	79.2263	45.3428	61.734	81.6407	33.4815	71.6425	0	42.417	28.7923	19.473	90.3147	53.9987	27.8913
LZIC	24.8368	41.0201	39.6646	19.4046	34.123	37.481	21.6716	40.5942	0	27.9187	30.0179	26.5817	11.8379	34.5234	16.3825	45.4054	33.2405	21.0587	49.2461	33.3895	28.8044	19.7087	22.5429	35.3992	18.8982	47.3611	12.982	20.6973	27.4968	17.0661	37.3843	29.3178	33.4627	15.6773	32.5176	36.432	45.3602	33.2663	44.0667	0	0	0	117.362	21.2085	35.46	32.455	56.1331	19.8943	36.4911
NMNAT1	23.7708	9.3339	0	9.70231	6.20418	11.9939	19.9379	5.53558	0	11.4298	15.255	16.1467	0	19.7276	0	12.684	11.4166	11.6993	12.3115	14.0652	14.2462	10.8281	7.1188	29.5552	10.3081	19.2953	6.49101	27.3934	26.4784	26.101	14.9434	10.6533	9.76477	10.2338	12.7279	11.597	16.3516	7.40804	12.9966	0	33.4815	0	0	15.9064	10.0015	19.473	15.9932	11.3682	13.0159
RBP7	0.904527	0.90064	0	0.693022	0	1.49924	7.80179	1.84519	0	2.81061	0	17.1353	0	1.97276	0	8.93893	1.23283	3.41978	2.17262	1.77344	16.222	0.311601	1.18647	0.856132	1.71802	0.877058	32.455	18.871	1.0184	2.3424	0.543552	0.555826	0.892479	0	0.410576	0.93978	0.615749	0.419323	0.101536	0	0	0	0	0	0.606154	0	1.25437	0	0.464855
UBE4B	154.814	91.7834	218.155	154.544	77.5523	35.9818	97.9559	75.6529	220.241	106.99	123.516	115.663	303.839	97.6519	122.869	167.147	134.212	86.3946	111.528	108.424	118.025	272.066	170.851	115.392	170.084	144.714	162.275	135.75	178.22	169.657	135.362	163.373	199.863	115.838	132.698	153.427	208.397	177.206	82.2443	0	44.642	42.9855	0	84.8341	87.8923	71.4011	98.7817	110.84	90.8791
KIF1B	264.612	332.664	19.8323	26.3348	65.1439	50.9742	139.565	204.816	220.241	141.467	190.933	129.064	23.6758	34.5234	131.06	180.514	222.471	195.288	220.159	129.4	190.088	23.2532	67.6286	107.426	42.9505	24.5576	136.311	130.271	146.65	194.419	807.925	760.837	920.461	114.967	409.509	677.992	752.377	1020.32	188.553	0	156.247	0	0	100.74	119.715	142.802	728.162	130.734	121.327
PGD	28.4926	52.5646	39.6646	22.1767	18.6126	25.4871	35.5415	33.2135	24.4713	20.4237	19.6839	7.68892	3.94596	21.7004	57.3387	28.867	43.3095	32.038	52.1429	27.2742	14.7661	24.4606	47.4587	40.9827	27.4883	37.7135	19.473	38.3508	19.3496	11.3774	29.1188	43.3866	50.4198	18.9434	33.1745	46.7362	53.9806	44.5601	23.2518	0	0	0	0	31.8128	50.6139	19.473	31.5161	14.2102	25.567
APITD1	5.43793	4.99446	0	5.54417	3.10209	7.49621	0.866866	3.69038	0	5.80859	10.334	1.75747	15.7838	6.90468	65.5299	3.99108	9.53004	2.69983	9.4147	7.52182	3.32758	7.94582	10.6782	7.55629	3.43604	1.75412	0	0.608743	3.0552	2.3424	6.83322	3.16176	2.78243	0.435481	3.20249	7.12706	8.00473	3.35458	4.16298	0	11.1605	14.3285	0	0	6.06154	6.49101	3.60631	8.52612	3.48641
APITD1-CORT	0.888375	2.86567	0	0.693022	0	0	0	3.69038	0	1.12424	0.984193	0.439367	0	0	0	1.10712	2.49433	0.539966	0	1.58998	0.311961	1.20745	1.18647	1.56337	1.71802	0.877058	0	1.21749	0	0.334629	1.78596	0.930404	0.682484	0	0.985382	1.97974	2.59983	0.810691	1.42151	0	0	0	0	0	2.42462	6.49101	0.940778	0	0.464855
DFFA	43.0135	69.8405	59.4969	26.3348	43.4293	26.9864	27.7397	92.2596	122.356	34.4768	37.3993	37.1265	23.6758	27.6187	16.3825	58.1987	67.6966	32.7579	77.4902	70.9375	57.5048	25.9018	42.7128	42.6205	32.6424	24.5576	51.928	35.3071	28.5152	23.0894	56.5164	35.8266	46.5034	21.9918	45.2455	71.8144	76.8318	26.3614	82.4474	0	78.1235	14.3285	0	26.5106	50.6139	51.928	44.5301	25.5784	49.0422
PEX14	63.5161	41.5113	158.658	33.9581	52.7356	47.9757	49.4114	20.2971	73.4138	44.2202	43.3045	46.2434	31.5677	52.2783	65.5299	57.693	75.4318	46.2571	28.2441	74.5455	57.0888	94.9603	88.985	135.641	63.5667	75.4269	32.455	72.4404	86.564	92.3575	60.3342	59.2961	57.8536	62.056	56.331	79.2993	78.679	52.9465	37.1622	40.8203	11.1605	42.9855	117.362	74.2298	48.4923	19.473	34.3384	45.4726	48.1125
CASZ1	14.4671	133.868	0	3.46511	12.4084	0	0.866866	7.38077	48.9425	3.93485	64.9567	8.01844	0	11.8366	16.3825	3.8544	39.158	3.77976	1.44842	65.8618	6.96712	2.337	4.74587	11.5392	8.5901	1.75412	0	4.2612	3.0552	13.0505	10.664	2.33608	1.61696	0.653221	1.56019	3.73527	6.49957	10.4272	1.92919	0	33.4815	0	0	0	43.34	0	302.46	8.52612	3.02156
C1orf127	0.253052	0.163753	0	0	0	0	2.6006	1.84519	0	0.187374	1.47629	0.329525	0	3.94553	0	0.382706	0.464461	7.19955	0	0.183459	0.207974	0.0779001	0	0.223339	1.71802	0	0	5.47868	0	0	0.207067	0.213469	0.283493	1.52418	0.16423	0.548602	1.09466	0.167729	0	0	0	14.3285	0	15.9064	0.303077	0	5.17428	2.84204	0.464855
TARDBP	27.8788	49.4533	19.8323	28.4139	24.8167	35.9818	26.006	40.5942	0	25.6702	38.8756	20.101	27.6217	45.3736	8.19124	26.2427	39.1523	21.2387	34.0378	25.5008	25.8927	33.0297	22.5429	24.7906	27.4883	28.0658	19.473	19.4798	21.3864	22.4201	28.9894	28.9392	26.1234	15.6773	24.963	39.9335	32.7031	27.9269	32.2885	81.6407	11.1605	28.657	0	26.5106	40.3092	19.473	31.2025	19.8943	18.5942
MASP2	1.01221	0.818764	0	0	0	0	0	0	0	0.562121	0.984193	0.65905	0	0	0	0.560392	0.957592	0.179989	3.62104	0.794989	0	2.88231	1.18647	90.7872	3.43604	0.877058	12.982	3.65246	5.092	3.68092	1.13887	1.23651	1.20747	0.435481	0.903267	2.37569	3.14716	1.34183	0.406145	0	0	0	0	0	0	0	0.940778	0	0.464855
SRM	26.8182	40.6926	0	39.5022	34.123	32.9833	19.9379	33.2135	0	31.8535	25.589	17.4648	7.89192	58.1966	16.3825	22.5933	18.9511	16.7389	44.9009	12.9644	22.6691	37.5868	36.7805	31.528	37.7964	13.1559	25.964	16.4361	13.2392	15.7275	20.711	21.7457	39.6366	16.9837	28.7403	40.0432	41.1868	31.8126	39.8022	81.6407	33.4815	42.9855	0	31.8128	38.7939	32.455	51.7428	28.4204	46.9503
EXOSC10	28.0834	44.6226	19.8323	43.6604	15.5105	26.9864	24.2722	38.749	24.4713	37.2874	28.5416	28.2293	47.3515	38.4689	32.765	37.2045	36.2566	29.3381	35.4862	30.8211	43.8825	66.1762	47.4587	29.3318	34.3604	40.3446	45.437	41.3945	23.4232	41.1593	38.4239	45.4811	43.2485	24.8224	66.3491	59.416	62.8064	54.7636	30.4608	0	22.321	14.3285	0	26.5106	44.8554	116.838	44.6869	28.4204	38.5829
MTOR	43.3581	52.7284	0	51.2836	74.4502	49.475	53.7457	44.2846	24.4713	42.1591	68.8935	44.9253	98.649	42.4144	24.5737	51.9251	53.9462	50.0368	30.4167	41.4617	57.0888	103.023	52.2045	41.6527	118.543	83.3205	64.9101	69.3967	72.3064	56.5522	62.3661	85.9355	97.1542	71.2011	101.33	109.01	131.975	86.716	54.0172	0	55.8025	57.314	0	5.30213	47.28	64.9101	33.868	25.5784	43.9288
ANGPTL7	0.059225	0.327505	0	0	0	0	0	3.69038	0	1.12424	0.984193	0	0	0	0	0.0410043	0.0344045	0	0	0.122306	0	0.19475	0	0	1.71802	0	0	1.82623	0	0	0.112161	0.559854	0.157496	0	0	0.124032	0.20525	1.1741	0	0	0	0	0	0	0	19.473	0.627185	0	1.85942
UBIAD1	15.2854	18.7497	0	17.3255	18.6126	14.9924	13.003	20.2971	24.4713	11.6172	13.7787	10.5448	7.89192	25.6459	8.19124	7.74981	10.2181	10.9793	8.69049	11.4356	12.2705	16.6317	11.8647	10.9808	20.6162	7.01646	12.982	9.13114	9.1656	6.35794	21.0475	19.1196	16.2536	7.62091	23.9776	20.0025	38.0396	23.0069	13.3012	40.8203	22.321	28.657	0	5.30213	29.7015	6.49101	16.7772	19.8943	15.1078
PTCHD2	1.36756	5.40384	0	0.693022	0	0	0	1.84519	0	0.187374	24.1127	0.549208	0	0.986382	0	1.55816	6.33616	0.359977	1.44842	1.10075	1.03987	1.0906	0	2.12172	0	1.75412	0	1.21749	0	0.669257	20.1373	55.5745	439.341	4.13707	28.3297	10.786	47.0022	220.284	4.46759	0	0	0	0	0	1.21231	0	2.35194	2.84204	1.62699
FBXO2	2.0998	1.7194	0	2.77209	0	0	0.866866	0	0	1.68636	15.255	0.439367	0	0.986382	0	0.191353	0.452992	0	1.44842	0.366918	0.415948	0.350551	0	8.33798	1.71802	1.75412	0	2.43497	0	0.669257	1.15181	3.23829	3.58042	0.870961	1.14961	4.9565	6.70482	3.18685	1.01536	0	0	0	0	0	0.303077	0	0.313593	0	0
FBXO44	7.15546	13.8371	0	0.693022	9.30628	4.49773	1.73373	3.69038	0	2.81061	22.1443	1.75747	0	6.90468	0	5.90461	4.30629	3.41978	7.24208	3.73033	2.3917	1.28535	1.18647	8.59854	0	2.63117	12.982	3.65246	7.1288	2.00777	9.69765	24.7826	22.4905	3.70158	13.2205	37.5578	44.2655	22.0564	4.36605	0	0	0	0	5.30213	6.36462	12.982	3.13593	2.84204	3.48641
FBXO6	1.3891	0.982516	0	0.693022	0	2.99848	5.2012	0	24.4713	3.18535	2.46048	2.52636	3.94596	5.91829	0	1.89986	1.14108	5.39966	5.79366	1.9569	2.3917	0.623201	1.18647	7.59352	6.87208	0.877058	6.49101	10.3486	2.0368	1.67314	2.43304	3.6612	2.75094	1.95966	2.7098	5.5385	5.26807	4.0255	1.82765	0	0	0	0	0	1.21231	0	1.88156	0	6.97282
MAD2L2	5.04489	18.2584	0	4.85115	3.10209	10.4947	6.06806	14.7615	0	5.43384	4.92097	7.79876	15.7838	7.89106	0	10.1554	16.4797	7.37953	10.1389	5.87069	8.7349	5.92041	5.93233	7.8913	22.3343	3.50823	12.982	4.2612	8.1472	4.35017	26.0775	28.625	22.774	1.74192	28.9046	28.9233	26.5456	32.7351	12.2859	0	0	0	0	5.30213	21.8215	12.982	15.9932	22.7363	14.1781
DRAXIN	1.30295	4.17569	0	0.693022	3.10209	0	0.866866	0	0	0.936869	1.47629	0.549208	0	0	0	2.46026	5.1492	0.539966	1.44842	0.794989	0.831895	1.4801	3.5594	3.12674	3.43604	0.877058	0	0.608743	1.0184	0.334629	140.965	282.847	215.014	10.2338	25.6199	219.866	138.817	475.317	21.4241	0	0	0	0	5.30213	3.33385	0	2.19515	2.84204	2.5567
AGTRAP	17.9721	3.52068	0	9.70231	24.8167	32.9833	22.5385	23.9875	0	14.6152	9.34983	30.3163	0	15.7821	0	3.8954	9.29495	17.6389	20.2778	8.74488	11.3346	12.3082	8.30527	13.9959	12.0261	12.2788	12.982	17.0448	5.092	13.3851	18.649	2.52135	1.96345	14.5886	4.59845	2.04653	1.84725	1.7332	17.2611	0	66.963	42.9855	117.362	21.2085	11.5169	12.982	11.9165	5.68408	41.6045
C1orf167	2.72973	2.53817	0	2.77209	0	0	0	0	0	2.81061	0.984193	1.09842	0	0	0	1.3258	1.13535	0.899943	2.89683	1.40652	2.07974	1.12955	0	1.41448	3.43604	1.75412	6.49101	2.43497	1.0184	2.3424	1.28554	1.99372	1.79546	4.79029	3.53095	2.099	4.24183	1.28592	1.42151	0	0	0	0	0	1.51538	6.49101	30.1049	2.84204	2.09185
MTHFR	53.9324	35.2887	19.8323	42.9674	12.4084	58.4704	78.0179	35.0586	73.4138	51.5278	64.4646	52.3945	19.7298	12.823	32.765	36.2478	28.441	65.5159	81.8355	29.17	35.0436	67.3836	36.7805	53.2291	29.2063	82.4434	103.856	84.6152	58.0488	97.7116	25.7583	35.8709	32.9272	54.6528	30.9574	42.6813	52.7491	30.1913	28.8363	0	33.4815	0	117.362	53.0213	29.7015	45.437	137.824	45.4726	30.9128
CLCN6	39.6269	25.7092	0	13.8604	12.4084	19.4901	26.006	31.3683	48.9425	16.3015	29.0337	19.442	15.7838	0.986382	16.3825	13.2444	15.138	21.0587	10.8631	14.3098	15.702	29.1347	27.2887	38.5259	22.3343	32.4511	19.473	37.742	27.4968	31.4551	32.7598	32.3346	34.3237	36.5804	33.9136	47.0796	54.1175	30.4988	12.0828	0	33.4815	14.3285	0	42.417	14.8508	12.982	14.7388	5.68408	19.2915
NPPA	5.36255	4.5032	0	4.15813	0	4.49773	6.93493	3.69038	0	4.12222	1.96839	3.51493	0	0	0	0.123013	0.194959	0.539966	0	0	0	4.82981	2.37293	11.8742	3.43604	4.38529	6.49101	7.30491	6.1104	4.35017	1.76439	2.83552	2.18395	1.95966	2.21711	2.61898	3.14716	2.32025	2.43687	0	0	0	0	0	2.42462	0	15.366	2.84204	6.27554
KIAA2013	12.5395	18.7497	0	19.4046	9.30628	25.4871	13.003	7.38077	0	11.0551	29.5258	17.2451	23.6758	11.8366	0	9.80002	11.5427	9.71939	17.381	10.2126	9.35882	15.0737	11.8647	11.6881	8.5901	4.38529	6.49101	12.1749	8.1472	8.03109	16.5826	33.6718	27.2049	13.9354	19.2971	28.3985	33.1136	21.8887	25.0794	0	0	0	0	5.30213	33.6415	32.455	19.5995	14.2102	26.4967
PLOD1	36.4611	19.3228	0	33.265	24.8167	46.4765	36.4084	51.6654	48.9425	91.8132	39.8598	56.898	7.89192	8.87744	0	48.344	21.8182	32.7579	139.048	19.8747	51.3695	21.9678	14.2376	36.9626	8.5901	21.0494	45.437	43.8295	99.8032	39.1516	22.0527	13.7426	9.18728	32.4433	15.1913	10.7049	15.3937	11.2938	181.14	0	66.963	14.3285	0	21.2085	205.789	110.347	53.6243	110.84	243.351
MFN2	25.4129	30.9493	39.6646	38.1162	12.4084	31.4841	34.6746	20.2971	122.356	20.049	23.6206	14.3893	63.1354	4.93191	0	24.6026	25.4077	34.9178	29.6925	23.5439	19.3416	43.5851	22.5429	28.5874	15.4622	35.9594	12.982	24.9585	30.552	21.4162	18.6749	24.255	26.8479	16.5483	16.6694	38.5262	41.6657	23.4541	31.4762	0	22.321	28.657	0	21.2085	29.3985	12.982	44.5301	36.9465	12.7835
MIIP	4.96952	8.59702	39.6646	9.70231	9.30628	8.99545	6.93493	11.0712	0	7.8697	3.93677	5.49208	3.94596	11.8366	0	8.03684	7.78115	13.4991	7.96628	5.01455	5.92725	12.5419	14.2376	8.97077	5.15406	8.77058	12.982	11.5661	11.2024	12.0466	11.5785	12.5302	9.61777	8.27413	6.15864	15.2845	16.0779	8.72192	7.61521	0	11.1605	14.3285	0	10.6043	7.88	6.49101	10.5054	8.52612	6.27554
TNFRSF8	0.979904	0.736887	0	0.693022	0	0	5.2012	3.69038	0	1.12424	0	0.329525	7.89192	0	0	1.39414	1.33031	1.25992	5.06945	1.22306	1.03987	0.740051	2.37293	1.37726	5.15406	0	12.982	4.86994	0	0.334629	1.00945	1.18415	1.87946	1.95966	1.31384	1.57425	1.57358	1.4257	0.812289	0	0	0	0	5.30213	0.909231	0	0.940778	0	1.39456
TNFRSF1B	1.29218	13.7552	0	11.0883	65.1439	2.99848	336.344	5.53558	0	30.3546	0.492097	60.9621	0	94.6927	172.016	5.19387	0.774101	296.621	7.96628	0.917295	42.8426	29.0568	26.1023	5.36013	46.3865	0.877058	0	259.933	117.116	33.4629	3.30876	0.467216	0.44099	178.765	0.16423	0.586766	0.273666	0.726826	100.927	81.6407	11.1605	57.314	469.448	217.387	1.81846	12.982	1.88156	25.5784	8.83224
VPS13D	52.8556	97.2691	118.994	46.4325	49.6335	71.9636	107.491	73.8077	24.4713	97.9965	84.6406	88.8619	47.3515	75.9514	40.9562	123.683	73.035	90.3543	93.4228	93.2583	114.178	124.679	106.782	67.1133	115.107	114.895	103.856	143.663	154.797	156.941	128.295	116.792	146.493	173.321	122.352	177.8	215.17	130.102	88.438	0	44.642	100.3	117.362	95.4383	51.8262	71.4011	46.7253	99.4714	83.9063
DHRS3	2.18056	3.60256	59.4969	42.9674	77.5523	35.9818	108.358	81.1884	0	136.97	0	143.014	39.4596	69.0468	65.5299	279.731	26.761	89.8143	174.534	200.888	331.51	99.7511	24.9158	156.747	39.5145	35.0823	84.3831	119.314	88.6008	16.7314	126.583	2.26358	3.49642	163.087	1.88865	6.61185	4.31024	2.96322	89.8595	0	66.963	100.3	0	106.043	0.909231	136.311	4.54709	2.84204	122.722
AADACL4	0.0861454	0	0	0	0	1.49924	0	0	0	0.749495	0	0	0	0	0	0.615064	0.791303	0.179989	0	0.244612	0	0.0389501	0	0.223339	0	0	0	0	0	0	0	0	0	0	0	0	0	0	0	0	0	0	0	0	0	0	0	0	0
LRRC38	13.5571	1.63753	0	0	0	1.49924	0	1.84519	0	3.74748	1.47629	1.09842	0	0	0	0.792749	0.986262	0.539966	4.34525	1.0396	0.831895	0.779001	0	0.930578	0	0	0	0	0	0.669257	1.06985	1.73192	96.1987	0.21774	1.23173	1.38343	1.77883	4.52869	1.1169	0	0	0	0	0	1.51538	0	103.486	0	1.16214
PDPN	2.70281	1.47377	19.8323	0	3.10209	0	0	75.6529	0	19.1121	0.984193	0.219683	0	0	0	0.710741	12.0645	1.07993	52.1429	4.34186	2.28771	0.779001	1.18647	1.82393	5.15406	0.877058	123.329	1.21749	1.0184	2.67703	166.081	5.46562	27.8978	196.184	5.4196	5.06145	4.65232	6.48553	6.59985	0	133.926	0	0	5.30213	16.6692	6.49101	45.4709	2.84204	63.4527
PRDM2	60.5549	95.9591	99.1615	29.7999	102.369	59.9697	58.9469	36.9038	122.356	60.3344	42.3203	53.0535	39.4596	161.767	81.9124	107.677	57.7307	46.4371	77.4902	85.4308	54.3852	65.553	77.1203	36.8137	149.468	55.2546	71.4011	66.353	64.1592	43.8364	86.0451	154.886	195.547	62.9269	70.3727	152.888	181.646	147.546	79.5028	0	55.8025	85.971	0	42.417	83.3462	38.946	82.6316	25.5784	71.3552
KAZN	136.131	243.337	79.3292	23.5627	55.8377	151.423	57.2132	149.461	97.885	274.315	320.847	91.1686	90.7571	20.714	155.634	408.963	271.623	41.7574	260.715	806.119	53.2413	55.6986	102.036	135.083	67.0028	335.036	311.568	85.8327	445.041	342.994	1242.15	1351.83	587.545	33.3143	1556.08	193.633	2117.08	193.895	70.7707	40.8203	0	28.657	0	5.30213	120.928	45.437	33.3976	19.8943	135.738
TMEM51	5.64791	25.5454	0	1.38604	0	1.49924	92.7547	5.53558	0	41.9717	40.3519	73.1546	0	0	40.9562	40.0885	16.1816	39.5975	21.002	70.0814	40.7629	1.3243	23.7293	15.4104	0	1.75412	0	130.88	54.9936	48.8558	23.0664	13.8675	63.282	75.7736	34.7347	4.04058	8.00473	17.4718	44.3713	0	33.4815	0	0	95.4383	30.3077	0	19.1291	34.1045	11.6214
C1orf195	0.161523	0.491258	0	0	0	0	0	0	0	1.12424	0.492097	0.768892	0	0	0	0.328034	0.30964	0	0	1.40652	0.623922	0.11685	1.18647	1.9356	0	0.877058	0	0.608743	0	0	0.349426	0.201386	0.808481	1.0887	0.0821152	0.300539	0.342083	0.251594	0.406145	0	0	0	0	0	0	0	0.470389	0	0
FHAD1	3.182	3.19318	0	0	0	1.49924	6.93493	0	0	12.1793	8.85774	5.71177	7.89192	0.986382	0	4.4968	11.5312	4.49972	8.69049	19.5078	3.74353	1.4022	1.18647	1.19114	1.71802	0	0	12.1749	2.0368	0.669257	18.6102	1.71581	2.29945	12.8467	2.21711	7.14614	11.5624	1.81707	1.1169	0	0	0	0	0	5.75846	0	4.54709	0	0.929709
EFHD2	46.9385	14.4921	0	17.3255	105.471	28.4856	69.3493	20.2971	24.4713	17.9879	15.255	12.522	15.7838	73.9787	0	9.77268	6.80635	99.8937	19.5536	19.8747	6.13523	7.75106	13.0511	10.5341	18.8982	9.64763	6.49101	63.3092	0	3.34629	13.7009	4.55536	2.28895	28.7417	2.87403	2.31844	3.28399	3.21481	25.7902	0	11.1605	14.3285	0	37.1149	60.3123	0	19.2859	14.2102	8.83224
CTRC	0.559945	0.736887	0	0	3.10209	1.49924	0.866866	0	0	0.936869	0.492097	0.439367	7.89192	3.94553	0	3.52637	3.68128	3.77976	3.62104	3.17996	3.84752	0.623201	0	0.930578	0	0.877058	0	1.21749	1.0184	0.334629	0.457274	0.273885	0.199495	0	0.16423	0.448423	0.273666	0.167729	0.203072	0	0	0	0	0	1.81846	0	0.627185	0	0.929709
CELA2A	3.67195	0.491258	0	0.693022	0	0	0.866866	1.84519	0	0.374748	0.492097	0.219683	0	0	0	0.0820085	0.298172	0.539966	0	0.244612	0.103987	0.0779001	0	0.0744462	0	0	0	0	0	0	0.150987	0.0886099	0.0944978	0	0	0.143114	0.0684165	0.0838646	0.101536	0	0	0	0	0	0.303077	0	0	0	0
CELA2B	2.89126	0.573135	0	0	0	0	0	0	0	0.187374	0.984193	0.219683	0	0	0	0.423711	0.521801	0.359977	0	0.244612	0	0.2337	0	0.186116	0	0	0	0	0	0	0.513354	0.382634	0.283493	0.21774	0.492691	0.586766	0.820998	0.335458	0	0	0	0	0	0	11.5169	0	1.41117	0	0.464855
CASP9	139.195	37.2537	19.8323	15.9395	24.8167	40.4795	44.2102	42.4394	73.4138	23.4217	58.5595	28.7785	3.94596	24.6596	0	8.13251	19.2206	36.5377	10.1389	15.1659	4.57542	8.17952	7.1188	16.6387	8.5901	21.0494	0	16.4361	6.1104	11.712	13.1315	10.8708	6.48885	6.96769	9.68959	13.6626	14.9148	11.6572	5.17834	0	0	0	0	10.6043	32.7323	19.473	19.7563	11.3682	9.29709
DNAJC16	42.5182	19.896	59.4969	20.0976	15.5105	53.9727	22.5385	12.9163	97.885	30.1672	41.3361	17.7944	3.94596	17.7549	65.5299	21.7596	29.628	21.0587	18.8294	27.8246	19.1336	36.0288	33.2211	42.6205	39.5145	82.4434	12.982	28.6109	30.552	29.4473	33.9677	27.0945	31.7723	34.8384	28.0834	50.0182	47.0022	27.7871	23.861	0	0	14.3285	0	26.5106	33.3385	0	32.7704	39.7885	25.567
AGMAT	3.98423	1.22815	0	4.85115	3.10209	1.49924	3.46746	1.84519	0	2.24849	2.46048	0.768892	0	5.91829	0	1.12078	2.76956	3.41978	0	1.10075	0.519935	2.4928	0	45.4867	1.71802	0.877058	0	1.21749	0	0.669257	0.802386	0.571937	0.787481	5.00803	0.328461	1.14968	2.53141	0.726826	0	0	0	0	0	0	1.51538	0	6.27185	0	0.232427
DDI2	37.0102	38.9731	99.1615	346.511	71.3481	53.9727	82.3523	27.6779	0	37.1	30.0179	41.1906	473.515	48.3327	57.3387	38.9814	58.7113	44.2772	39.1072	75.7686	61.7682	333.997	87.7985	192.332	79.0289	44.7299	38.946	98.6163	56.012	54.2098	35.0634	36.3784	40.6865	55.0883	39.8259	44.9711	50.6282	36.8445	49.7527	204.102	22.321	28.657	0	58.3234	47.28	25.964	113.521	25.5784	34.6317
PLEKHM2	39.4708	27.6742	79.3292	27.0278	21.7146	34.4826	91.0209	35.0586	24.4713	48.7172	30.51	46.1335	15.7838	62.1421	81.9124	68.8462	46.1823	96.8339	93.4228	44.6417	77.7822	58.6978	37.9669	36.8881	49.8226	37.7135	45.437	149.142	87.5824	96.0384	37.8459	39.1052	45.7264	99.2896	42.4536	59.5735	61.5749	40.6464	50.8696	0	44.642	28.657	234.724	68.9277	30.6108	45.437	70.2447	28.4204	28.5886
SLC25A34	2.17517	4.5032	0	0	0	0	10.4024	3.69038	0	5.05909	2.46048	4.06414	0	0	0	7.20308	3.19388	2.33985	2.89683	1.83459	2.49569	1.67485	1.18647	6.55127	3.43604	1.75412	0	10.9574	13.2392	11.712	4.3139	6.27519	7.94831	5.22577	6.89768	14.6501	15.5306	6.3178	2.13226	0	0	0	0	5.30213	12.1231	0	11.4461	2.84204	3.02156
TMEM82	0.26382	0.245629	0	0	0	0	0	0	0	0.374748	0.492097	0.109842	0	0	0	0.300698	0.682356	0	0	0.428071	0.103987	1.4022	0	66.4061	0	0.877058	0	2.43497	0	0.669257	0.163928	0.294024	0.482989	0.653221	0.246346	0.448423	0.410499	0.139774	0.101536	0	0	0	0	0	0	0	0	0	0
FBLIM1	1.58831	4.25757	19.8323	1.38604	0	0	0	16.6067	0	52.0899	5.41306	12.0826	0	6.90468	0	134.549	27.8046	2.33985	16.6568	54.9154	34.1077	1.0127	2.37293	10.6086	0	0	6.49101	3.65246	43.7912	37.1438	2.03185	28.037	26.6064	2.1774	14.6165	64.4918	71.29	26.7248	10.3567	0	33.4815	14.3285	0	5.30213	7.57692	6.49101	64.2865	59.6828	4.64855
SPEN	67.285	136.16	99.1615	99.7951	80.6544	106.446	99.6896	97.7952	122.356	99.1207	124.008	90.7292	118.379	109.488	196.59	105.49	120.467	104.573	94.8712	98.9456	100.035	202.346	129.325	87.586	128.852	135.944	84.3831	151.577	95.7296	94.0307	184.674	165.318	197.689	131.733	148.054	157.678	123.56	201.778	128.342	81.6407	55.8025	114.628	352.086	137.855	172.451	77.8921	71.9695	122.208	84.836
ZBTB17	7.25775	9.57953	39.6646	9.00928	9.30628	8.99545	4.33433	12.9163	24.4713	6.18334	5.90516	4.17398	3.94596	13.8094	32.765	9.95037	10.2927	7.73951	10.8631	7.39951	10.1907	12.464	13.0511	9.23133	10.3081	15.787	6.49101	10.3486	6.1104	12.3813	10.0686	12.9652	13.9857	5.22577	12.3173	19.6161	17.1726	12.2163	8.83365	0	22.321	14.3285	0	15.9064	8.78923	12.982	10.6621	11.3682	4.41612
HSPB7	14.4186	3.93007	19.8323	2.07907	3.10209	2.99848	7.80179	7.38077	24.4713	6.93283	6.88935	3.18541	0	0	0	0.246026	0.0286704	0	0	0	0.623922	2.06435	1.18647	5.62069	3.43604	3.50823	25.964	3.65246	2.0368	2.00777	0.60826	0.543743	0.818981	0.435481	0.16423	0.963632	0.820998	0.698872	1.21843	0	0	0	0	0	3.33385	6.49101	109.757	14.2102	3.95126
CLCNKA	3.10662	0.245629	0	0.693022	0	0	0	0	0	0.562121	0.492097	0	0	0	0	0.0683404	0.366981	0	0	0.061153	0	0	0	0.111669	0	0	0	0	0	0	0	0	0	0	0	0	0	0	0	0	0	0	0	0	0	0	0.313593	0	0
CLCNKB	1.06067	0.163753	0	0	0	1.49924	0.866866	1.84519	0	0.562121	0	0.109842	0	0	0	0.246026	1.35324	0	0	0.733836	0.311961	0.0779001	0	0.186116	0	0.877058	0	0	0	0	0.0690224	0.0805545	0.0524988	0	0.16423	0.338702	0.410499	0.0279549	0	0	0	0	0	0	0	0	0.627185	0	0
FAM131C	4.49572	4.91258	0	0.693022	0	1.49924	3.46746	0	0	0.749495	3.44468	0.65905	0	0	0	0.164017	0.344045	0	0	1.22306	0	0.0779001	0	0.186116	0	0.877058	0	0	0	0	0.647085	1.45401	2.18395	0.21774	1.47807	6.97918	14.3675	2.2923	0.812289	0	0	0	0	0	0.606154	0	0.156796	0	0
EPHA2	0.403807	0.327505	0	0	0	0	0.866866	9.22596	0	3.74748	0	14.6089	0	0	0	4.46946	18.4064	0.719955	7.24208	34.9184	19.6535	0.856902	0	8.30076	0	0	19.473	2.43497	12.2208	21.7509	0.534924	0.241663	0.251994	1.52418	0.574806	0.429341	0.136833	0.111819	14.3166	0	44.642	0	0	0	10.0015	6.49101	3.29272	11.3682	1.62699
ARHGEF19	4.96952	2.29254	0	2.07907	0	2.99848	1.73373	14.7615	0	3.37273	0.984193	2.96573	0	2.95915	0	4.64715	3.87624	1.25992	2.89683	15.0436	2.80765	1.67485	1.18647	1.97283	1.71802	3.50823	0	1.21749	0	4.01554	0.284717	0.733046	0.377991	1.74192	1.31384	1.22601	1.642	1.09024	3.24916	0	0	0	0	10.6043	1.81846	12.982	0.627185	0	2.09185
C1orf134	0.11845	0.573135	0	0	0	0	0	0	0	0.187374	1.47629	0	0	0	0	0.177685	0.258034	0	0	0.672683	0.103987	0.467401	0	0.111669	0	0	0	0	0	0	0.33217	0.281941	0.356992	0	0.0821152	0.477046	0.957831	0.307503	0	0	0	0	0	0	0	0	0	0	0
RSG1	1.29218	0.982516	0	0.693022	0	1.49924	0.866866	3.69038	24.4713	0.562121	1.47629	1.09842	0	0	0	0.533055	0.768367	0.359977	0	1.28421	0.831895	0.895852	1.18647	1.34003	0	2.63117	0	0	0	0	0.569435	0.708879	0.619485	0.653221	1.14961	1.90341	2.59983	0.615007	0.507681	0	0	0	0	5.30213	0	0	0.627185	2.84204	1.16214
FBXO42	71.35	79.0107	99.1615	56.1348	52.7356	58.4704	101.423	53.5106	0	101.557	93.9904	64.1476	71.0273	64.1149	90.1037	116.889	100.559	84.4147	87.6291	99.5571	76.1184	173.523	112.714	89.9683	139.16	93.8452	90.8741	138.185	141.558	121.47	121.052	138.078	146.188	165.047	142.963	177.103	193.482	172.342	46.3005	0	55.8025	28.657	0	106.043	62.7369	71.4011	53.1539	110.84	74.6092
SZRD1	59.8065	40.0375	118.994	38.8092	49.6335	59.9697	39.009	60.8913	24.4713	54.3384	30.51	52.2846	19.7298	74.9651	32.765	54.2896	59.8179	40.1375	50.6945	42.6237	51.9935	39.2617	21.3564	57.2492	34.3604	40.3446	38.946	31.0459	20.368	33.4629	32.3499	27.0945	22.3855	21.774	26.7696	26.0562	27.5034	23.51	71.583	0	66.963	14.3285	0	21.2085	45.1585	51.928	81.3773	42.6306	36.7235
SPATA21	9.01297	3.52068	0	1.38604	0	1.49924	3.46746	3.69038	0	4.87172	3.44468	3.07557	0	5.91829	16.3825	3.212	4.20882	4.49972	2.17262	3.97495	3.01562	1.98645	2.37293	21.4405	5.15406	0.877058	0	1.82623	1.0184	2.00777	2.62285	2.49316	2.57244	3.48384	2.38134	5.52419	3.21558	2.90731	4.16298	0	0	0	0	0	3.94	19.473	3.91991	0	2.32427
NECAP2	25.4667	12.609	19.8323	23.5627	37.2251	32.9833	39.8758	20.2971	24.4713	28.4808	12.7945	58.8751	23.6758	30.5779	49.1475	11.3855	10.2812	24.6584	5.79366	9.96794	23.3971	19.4361	13.0511	15.1126	18.8982	13.1559	32.455	43.8295	29.5336	45.1749	11.173	8.22864	8.79879	18.5079	8.95056	13.6101	13.2044	8.30259	49.7527	40.8203	33.4815	28.657	0	31.8128	18.4877	19.473	12.3869	28.4204	14.8753
NBPF1	130.343	84.3326	19.8323	18.0186	37.2251	13.4932	76.2842	51.6654	195.77	94.9985	73.3224	42.6186	0	5.91829	24.5737	75.6529	65.6896	33.8379	130.357	37.6703	48.9778	12.1524	46.2722	42.0994	24.0523	8.77058	84.3831	141.228	165.999	63.5794	117.002	117.324	111.602	88.6203	82.8542	146.248	110.356	154.227	47.4174	40.8203	66.963	14.3285	117.362	68.9277	324.292	58.4191	244.916	71.051	138.062
CROCC	25.0683	24.7267	39.6646	4.15813	12.4084	11.9939	13.003	12.9163	0	26.7945	32.9705	19.8813	7.89192	18.7413	8.19124	32.2567	26.91	12.2392	28.2441	17.979	20.6934	7.90687	23.7293	14.1448	8.5901	14.0329	12.982	23.1322	28.5152	53.5406	32.406	29.7246	38.3556	21.1208	23.4849	53.4816	48.5757	45.5944	22.2364	0	11.1605	14.3285	0	10.6043	19.7	32.455	12.7005	31.2624	24.1724
ATP13A2	9.1045	52.319	0	12.4744	12.4084	71.9636	30.3403	18.4519	24.4713	17.2384	41.8282	14.7188	0	23.6732	0	12.561	16.5543	18.5388	15.2084	13.9429	30.9881	7.36156	20.1699	9.41745	32.6424	28.9429	25.964	58.4393	4.0736	15.0583	43.3375	68.1894	110.09	28.9595	61.5043	155.073	184.451	63.2898	59.6017	0	11.1605	42.9855	117.362	21.2085	21.5185	38.946	15.2092	22.7363	10.2268
SDHB	55.6446	43.3945	39.6646	34.6511	37.2251	35.9818	55.4794	38.749	48.9425	40.8475	57.0832	36.9068	47.3515	18.7413	0	26.8031	36.1476	28.2582	24.6231	27.2131	27.6605	50.9467	46.2722	63.3538	44.6685	31.5741	19.473	50.5256	41.7544	35.136	37.4705	41.26	42.461	42.2416	39.3332	56.3105	86.889	44.3644	36.2484	81.6407	22.321	42.9855	0	47.7192	44.2492	12.982	65.2272	34.1045	29.2858
PADI2	0.430727	0.245629	0	0	0	1.49924	5.2012	1.84519	0	0.374748	0.984193	0	0	0	16.3825	0.779081	1.27297	12.5992	0	1.77344	1.24784	0.389501	1.18647	1.11669	0	0	0	5.47868	0	0.669257	0.45296	2.90802	16.9676	2.1774	22.6638	9.92732	18.8145	1.28592	0.203072	0	0	0	0	26.5106	1.51538	6.49101	119.322	0	2.09185
PADI1	0.14537	0	0	0	0	0	0	0	0	0.749495	0	0	0	0	0	0.341702	0.59061	0	0	0.61153	0.623922	0.0389501	0	0.148892	0	0	0	0	3.0552	0.334629	0.224323	0.173192	0.251994	0	0.574806	0.31485	0.615749	0.167729	0	0	0	0	0	5.30213	0	0	0.783981	2.84204	0
PADI3	0.0969136	0	0	0	0	0	0	0	0	0	0	0.109842	0	0	0	0.28703	0.298172	0.359977	0	1.71228	0	0.0779001	0	0.260562	0	0	0	0	0	0.334629	0.146673	0.17722	0.083998	0.21774	0	0.195589	0.342083	0.0559097	0	0	0	0	0	0	0	0	0	0	0
PADI4	0.339198	0.409382	0	0	0	31.4841	1.73373	0	0	0.374748	1.47629	0.329525	0	1.97276	65.5299	0.902094	1.03787	8.63946	0	1.0396	0.519935	0.817952	3.5594	0.744462	0	140.329	0	9.13114	0	1.00389	0.440018	0.660547	0.755982	0.21774	0.328461	0.987484	1.02625	0.335458	0.406145	0	0	0	117.362	21.2085	0	0	0.156796	0	0
RCC2	24.3253	61.0798	0	54.0557	52.7356	68.9651	39.009	92.2596	48.9425	25.1081	10.8261	29.5474	23.6758	77.9242	16.3825	33.0631	58.8202	75.4152	15.9326	55.7716	52.4094	60.3726	88.985	23.4506	72.1568	56.1317	51.928	42.612	37.6808	30.1166	25.8748	30.8806	26.0394	38.54	38.7584	13.4384	11.0835	24.4605	55.7433	40.8203	11.1605	71.6425	0	26.5106	55.16	51.928	20.8539	42.6306	21.3833
ARHGEF10L	2.37977	58.8691	0	0.693022	3.10209	2.99848	47.6776	31.3683	0	27.9187	53.6385	1.09842	7.89192	0.986382	24.5737	26.5708	42.2946	51.6567	50.6945	153.678	14.8701	2.64861	2.37293	191.476	1.71802	4.38529	32.455	15.8273	73.3248	1.33851	89.1252	58.4624	43.868	57.4834	42.2072	46.0635	69.5796	72.1515	14.2151	0	0	0	0	63.6256	19.3969	19.473	23.3626	48.3147	31.3777
ACTL8	0.312277	0.163753	0	0	0	0	0	0	0	0.374748	0	0.109842	0	0	0	0.410043	0.487397	0.359977	0	0.794989	0.623922	0.272651	0	0.111669	0	0	0	0.608743	0	0.334629	0.207067	0.289996	0.272994	0.21774	0.574806	0.372096	0.273666	0.167729	0	0	0	0	0	0	0	0	0	0	0
IGSF21	1.2168	3.76631	0	0	0	1.49924	168.172	0	0	1.12424	89.0695	1.3181	0	0	0	0.6424	1.12961	24.4785	1.44842	0.672683	0.727908	0.934802	0	2.45673	0	0.877058	0	211.842	3.0552	0.669257	4.60725	126.197	36.2346	3.91932	93.2008	12.1885	267.509	249.805	3.85837	0	0	0	0	0	0.303077	6.49101	1.88156	0	0.464855
PAX7	0.371502	0.409382	0	0	0	0	0	0	0	0.187374	0	0.329525	0	0	0	0.519387	0.797037	0.539966	1.44842	0.305765	0.519935	0.350551	1.18647	0.446677	1.71802	1.75412	0	0	0	0	24.9473	0.809572	1.00798	0.653221	0.821152	1.0018	1.57358	0.810691	0.710753	40.8203	0	0	0	0	453.403	12.982	49.8612	8.52612	3.95126
RP13-279N23.2	0.0646091	0.245629	0	0	0	1.49924	0	0	0	0.187374	0	0	0	0	0	0.341702	0.412854	0	0	0.672683	0.415948	0.467401	0	1.19114	1.71802	0.877058	0	0	0	0.669257	0.306287	0.14097	0.188996	0	0.16423	0.281457	0.615749	0.0838646	0.304608	0	0	0	0	5.30213	0.303077	0	0.940778	0	0
ALDH4A1	5.76098	2.70192	79.3292	2.77209	3.10209	7.49621	3.46746	5.53558	0	5.99596	3.44468	3.84446	11.8379	9.86382	0	3.75872	8.73301	5.21967	2.17262	42.1956	3.22359	13.9052	10.6782	153.545	12.0261	12.2788	12.982	6.69617	8.1472	6.35794	5.7418	3.66523	3.16043	1.52418	5.50172	5.97261	6.97849	2.96322	8.12289	0	22.321	0	0	0	2.42462	6.49101	13.9549	2.84204	3.25398
IFFO2	22.6509	6.05885	19.8323	6.2372	12.4084	0	5.2012	18.4519	24.4713	23.4217	6.39725	13.6204	0	34.5234	0	32.5574	17.4087	10.4393	15.2084	41.7064	34.7316	1.90855	14.2376	11.8742	6.87208	1.75412	0	4.86994	16.2944	18.0699	7.94621	14.2863	16.6736	1.74192	25.6199	16.1862	21.8933	17.2202	21.018	0	0	0	0	10.6043	7.27385	19.473	7.99661	25.5784	5.81068
UBR4	95.9714	86.7071	79.3292	196.818	68.246	160.419	69.3493	81.1884	122.356	79.2591	92.022	84.1387	284.109	74.9651	163.825	91.0568	91.2579	73.6154	70.2481	75.6463	84.9573	201.956	87.7985	108.766	132.288	244.699	110.347	94.3551	106.932	112.435	83.4222	101.656	107.181	72.5075	98.9488	149.325	140.733	107.99	97.3732	40.8203	89.284	71.6425	234.724	74.2298	75.1631	84.3831	90.0011	73.893	70.4255
EMC1	23.1947	30.8674	0	31.879	9.30628	32.9833	20.8048	55.3558	0	37.1	35.923	18.8928	3.94596	6.90468	24.5737	24.5752	23.246	24.6584	27.5199	21.8928	14.6622	28.3946	27.2887	25.1628	8.5901	13.1559	19.473	15.8273	19.3496	11.712	31.7158	30.7638	41.5055	19.8144	34.5705	39.0843	47.6179	33.8533	21.3226	0	55.8025	0	0	15.9064	51.22	32.455	38.1015	25.5784	47.88
MRTO4	18.3436	18.7497	0	20.0976	12.4084	34.4826	18.2042	16.6067	0	13.3035	18.2076	11.5334	31.5677	22.6868	16.3825	20.4201	30.1727	19.2588	22.4504	28.2527	26.7246	31.8222	15.4241	20.9194	17.1802	14.0329	19.473	9.13114	20.368	9.3696	16.8328	12.0389	16.6946	5.87899	13.6311	18.9626	21.346	11.5454	20.2057	0	22.321	42.9855	117.362	5.30213	33.3385	12.982	25.0874	36.9465	14.1781
AKR7A3	0.673011	0.491258	0	0	0	1.49924	0.866866	1.84519	0	0.374748	0	0.549208	0	0	0	0.478383	0.521801	0	1.44842	0.489224	0.207974	0.19475	2.37293	1.00502	1.71802	0	0	0.608743	0	0	0.776502	0.49541	0.619485	0	0.16423	1.09243	0.820998	0.447278	0.507681	0	0	0	0	0	1.21231	0	1.56796	0	0.232427
AKR7A2	20.1796	18.0128	0	10.3953	24.8167	16.4917	10.4024	18.4519	24.4713	16.1141	16.2392	14.4991	35.5136	10.8502	0	15.0212	18.997	15.119	27.5199	19.4467	9.35882	5.64776	10.6782	16.5271	3.43604	12.2788	12.982	8.5224	3.0552	5.01943	11.2377	10.46	7.90631	6.31447	6.73345	8.88736	8.07315	7.57577	18.7842	0	22.321	14.3285	234.724	10.6043	26.9739	45.437	25.8714	11.3682	19.2915
PQLC2	33.9413	10.8896	59.4969	13.1674	6.20418	31.4841	21.6716	22.1423	0	15.552	18.2076	9.88575	7.89192	2.95915	16.3825	3.75872	4.85103	6.65958	6.51787	4.15841	4.26346	8.68587	5.93233	11.1669	5.15406	7.89352	6.49101	8.5224	3.0552	5.35406	9.32234	6.77866	6.67784	18.0724	9.03267	8.24335	9.64673	5.05983	6.29524	0	0	14.3285	0	10.6043	11.2138	12.982	11.4461	2.84204	10.2268
CAPZB	160.101	162.033	218.155	75.5394	288.495	431.782	439.501	160.532	146.828	156.27	149.597	185.742	35.5136	300.847	360.415	181.512	153.203	554.905	197.709	145.972	187.904	78.5234	142.376	147.962	194.136	370.995	220.694	378.029	148.686	222.528	127.463	154.282	129.85	1170.35	133.191	172.676	153.732	141.843	176.774	40.8203	223.21	229.256	586.81	381.753	145.78	110.347	312.652	201.785	129.694
MINOS1-NBL1	0.166907	0.163753	0	0	0	0	0	0	0	0.374748	0	0.329525	0	0	0	0.464715	0.498865	0	0	0.244612	0.727908	0.428451	0	0.372231	0	0	0	0	1.0184	0.334629	0.340798	0.374578	0.482989	1.52418	0.328461	0.581996	1.09466	0.531142	0.609217	0	0	0	0	0	0.606154	0	0	0	0.697282
MINOS1	47.057	42.3301	39.6646	29.1069	52.7356	46.4765	49.4114	36.9038	24.4713	34.102	31.4942	26.2522	27.6217	22.6868	32.765	27.5549	32.5237	40.3175	28.9683	31.555	20.5894	41.9492	32.0346	36.4787	27.4883	21.0494	32.455	33.4808	26.4784	24.0933	23.7955	28.7096	27.9398	40.282	22.0069	29.5148	43.855	31.7847	43.1529	81.6407	11.1605	100.3	0	37.1149	34.8539	19.473	73.2239	31.2624	26.2643
NBL1	1.56139	19.9778	0	2.07907	9.30628	4.49773	9.53553	3.69038	0	22.8596	3.44468	12.4121	7.89192	5.91829	0	16.9348	27.0591	21.4186	102.113	9.84564	13.8303	1.1685	8.30527	3.49897	1.71802	3.50823	142.802	3.04371	2.0368	12.3813	5.82377	4.34189	6.40485	149.152	15.7661	12.5988	35.9187	17.8911	108.339	81.6407	89.284	28.657	234.724	42.417	22.4277	6.49101	10.035	79.5771	132.251
TMCO4	65.5028	4.01194	79.3292	6.2372	18.6126	8.99545	32.9409	3.69038	0	14.9899	8.85774	16.1467	3.94596	5.91829	0	9.37631	20.9007	25.7384	13.7599	70.2037	19.5495	7.01101	35.594	35.3992	29.2063	27.1888	32.455	48.6994	17.3128	31.4551	2.81266	0.974709	1.21797	20.6853	0.903267	1.6792	3.62608	0.866601	2.03072	0	0	28.657	0	26.5106	8.78923	6.49101	5.33107	0	12.5511
OTUD3	22.8178	10.9714	0	9.00928	12.4084	2.99848	7.80179	1.84519	24.4713	9.74344	7.38145	7.02987	0	4.93191	16.3825	7.81815	14.4786	3.95975	5.06945	5.993	4.15948	22.8637	5.93233	9.52912	18.8982	6.1394	12.982	10.9574	8.1472	11.712	11.3283	13.2552	17.2091	6.31447	14.8629	24.2148	31.3348	14.4247	6.09217	0	0	0	0	0	13.6385	12.982	6.74224	0	9.06467
PLA2G2A	0.290741	0.163753	0	0	0	0	1.73373	0	0	4.49697	0.492097	0.109842	0	0	0	0.0410043	0.0630749	0	1.44842	3.30226	0	0.11685	0	1.26559	0	0.877058	45.437	0	0	0.334629	0	0	0	0	0	0	0	0	0	0	0	14.3285	0	0	0.606154	0	3.60631	5.68408	2.5567
PLA2G5	0.44688	0.491258	19.8323	0	0	1.49924	0.866866	0	0	57.3364	0	0.109842	0	0	0	0.28703	0.321109	0	0	0.489224	0.935882	0.350551	1.18647	0.483901	0	0.877058	0	0	3.0552	1.33851	0.53061	0.298052	0.272994	0.653221	0	0.486587	0.684165	0.251594	0.304608	0	0	0	0	0	0.303077	0	0.470389	0	0
PLA2G2D	0.172291	0.0818764	0	0	0	0	0.866866	1.84519	0	0.187374	0	0	0	0	0	0.0546723	0.108948	0.719955	0	0.244612	0	0	0	0.260562	0	0	0	0	0	0	0	0	0	0	0	0	0	0	0	0	0	0	0	0	0.303077	0	0.783981	0	0.929709
UBXN10	0.608402	0.327505	0	9.70231	0	0	0	0	0	0.187374	1.96839	0.219683	0	0	0	0.218689	1.31884	0.179989	1.44842	2.75189	0	3.62236	0	0.558347	0	0	0	1.21749	0	0	1.82478	0.193331	0.272994	0	0	0.0954091	0.273666	0.447278	0.101536	0	0	0	0	0	0	0	0	0	0.464855
VWA5B1	0.26382	0.736887	0	0	0	0	0	0	0	1.12424	31.0021	0.219683	0	0	0	0.423711	1.11241	0.899943	0	25.0116	0.207974	0.2337	0	0.335008	0	0	0	0	0	0	4.1888	4.33786	1.28097	0	0.246346	0.896846	0.889415	0.447278	0.203072	0	0	0	0	0	0	0	0.313593	2.84204	1.62699
CAMK2N1	6.14863	55.0209	0	0	3.10209	2.99848	0	42.4394	0	11.2424	46.7492	2.30668	0	1.97276	0	18.9166	95.5355	3.59977	32.5893	110.198	0.727908	4.79086	3.5594	110.627	5.15406	7.01646	12.982	4.86994	12.2208	4.35017	16.1383	78.8427	154.861	6.74995	28.4119	45.7439	96.8778	74.5836	103.973	0	11.1605	0	0	0	5.45539	51.928	8.62379	51.1567	17.6645
MUL1	11.9581	18.8316	19.8323	10.3953	3.10209	10.4947	9.53553	18.4519	0	16.3015	11.8103	18.5632	7.89192	9.86382	40.9562	7.95483	9.02544	10.4393	15.9326	7.33836	11.3346	5.99831	4.74587	9.71524	1.71802	5.26235	12.982	7.91366	4.0736	5.01943	16.4662	11.6885	13.7967	9.14509	17.4084	15.7759	17.0357	13.2786	20.9164	0	11.1605	0	0	5.30213	17.8815	19.473	16.934	8.52612	20.686
FAM43B	4.92644	1.3919	19.8323	0.693022	3.10209	0	0	1.84519	0	3.74748	4.42887	0.988575	0	0	0	1.89986	1.08374	0	4.34525	0.122306	2.28771	0.0779001	0	0.260562	0	0	0	0	0	0.334629	1.20789	3.76189	8.5153	0	0.903267	6.08233	11.1519	6.90485	6.19371	0	0	0	0	0	0	0	0.313593	0	2.32427
CDA	0.533025	0.245629	0	0	0	0	0.866866	0	0	1.68636	0	19.5518	0	0	16.3825	8.29653	1.79477	5.57965	2.17262	0.856142	11.7505	0.740051	2.37293	10.9808	0	0	0	0.608743	0	5.01943	0.349426	0.422911	0.43049	0	0.739037	0.815748	0.684165	0.475233	27.8209	0	11.1605	0	0	0	0	0	0.783981	2.84204	0.232427
PINK1	27.8681	49.5352	19.8323	35.3441	18.6126	11.9939	13.8699	40.5942	24.4713	30.5419	31.0021	34.2706	23.6758	11.8366	8.19124	18.7116	12.8271	6.47959	21.7262	12.2306	27.0366	10.8671	8.30527	34.2825	1.71802	6.1394	25.964	14.0011	9.1656	15.3929	17.3764	21.3711	23.8764	7.83865	12.8921	25.0878	54.2543	23.8735	114.533	40.8203	33.4815	0	0	0	10.6077	32.455	44.2165	36.9465	15.1078
DDOST	98.5935	65.2555	178.491	97.0231	108.573	151.423	101.423	92.2596	73.4138	86.0046	95.9588	76.999	55.2434	56.2238	65.5299	59.2238	64.4339	95.574	156.429	71.121	69.1513	59.9442	55.7639	81.2581	46.3865	85.9516	84.3831	54.7868	49.9016	58.2254	74.1603	54.342	72.5008	75.7736	73.0825	67.5258	69.3744	45.9019	81.2289	0	100.445	100.3	0	47.7192	88.8016	129.82	70.5583	62.5249	155.726
KIF17	19.9158	3.60256	0	2.77209	3.10209	4.49773	6.06806	7.38077	0	6.55808	14.7629	29.6573	0	0	16.3825	0.833753	3.24549	6.83957	2.17262	0.978448	16.9499	0.584251	1.18647	1.30281	3.43604	0	0	2.43497	5.092	44.5056	1.40202	0.63638	1.69046	1.0887	0.739037	4.85632	10.5361	1.03433	26.1963	0	11.1605	0	0	5.30213	0.909231	0	0.940778	0	0.232427
SH2D5	0.129218	0.327505	0	0	0	0	0	0	0	0.187374	0.984193	0	0	0	0	0.0273362	0.99773	0	0	0	0	0.0779001	0	0.372231	0	0	0	0	0	0	0.163928	0.165137	1.24947	0.21774	0.16423	1.79369	1.09466	0.167729	0.507681	0	0	0	0	0	0	0	0	0	0
HP1BP3	162.61	219.347	198.323	232.855	173.717	160.419	177.708	254.636	146.828	223.35	144.676	217.596	256.487	219.963	24.5737	178.341	206.983	140.211	220.159	142.12	175.946	516.829	256.277	205.509	233.651	192.076	207.712	176.535	233.214	240.933	282.026	245.119	237.158	229.716	243.8	223.31	241.51	292.827	194.239	244.922	122.766	143.285	234.724	190.877	250.948	188.239	138.608	215.995	196.634
EIF4G3	341.61	297.211	178.491	117.121	260.576	557.718	452.504	258.327	513.896	365.004	428.124	466.827	157.838	221.936	475.092	389.171	472.752	427.653	391.796	341.723	548.947	297.15	503.062	250.921	479.328	1016.51	357.005	504.648	724.082	849.288	986.757	549.861	789.245	707.22	1212.18	574.229	895.025	688.752	376.699	81.6407	368.297	243.585	234.724	503.702	247.008	331.041	156.326	241.573	247.303
ECE1	318.388	82.777	118.994	59.5999	71.3481	178.41	45.077	103.331	220.241	84.1308	216.03	227.482	114.433	80.8834	327.65	15.937	49.1927	7.01956	39.1072	24.0943	203.398	97.5699	14.2376	156.895	73.8749	255.224	51.928	17.0448	174.146	158.949	20.0251	20.2715	70.4638	1.74192	19.7076	44.4273	35.4398	8.63805	321.667	163.281	156.247	0	0	0	62.4339	90.8741	16.6204	116.524	37.8857
NBPF3	7.80155	2.29254	19.8323	1.38604	0	1.49924	0.866866	7.38077	0	7.49495	6.39725	5.49208	0	1.97276	8.19124	4.96152	4.65607	0.539966	3.62104	6.48222	4.57542	1.83065	3.5594	2.01005	0	5.26235	0	0	41.7544	6.02332	8.41642	8.18031	18.7841	3.91932	9.1969	23.5374	21.2091	8.86169	3.95991	0	0	0	0	5.30213	3.33385	19.473	2.50874	2.84204	6.04311
ALPL	38.4209	8.67889	39.6646	2.07907	18.6126	5.99697	14.7367	55.3558	24.4713	19.2995	3.93677	17.5747	0	1.97276	0	1.50349	5.59646	0.539966	23.1746	3.42457	7.07111	1.20745	0	2.34506	0	0	0	2.43497	119.153	5.35406	8.77447	1.98567	12.4737	0.21774	39.6616	25.5267	3.21558	1.9848	93.4133	0	11.1605	14.3285	0	0	0.303077	6.49101	2.35194	2.84204	2.09185
RAP1GAP	71.1508	14.4102	59.4969	34.6511	24.8167	14.9924	12.1361	33.2135	48.9425	14.9899	21.1602	10.435	134.163	2.95915	8.19124	1.76318	3.95652	0.719955	2.17262	25.0116	0.415948	50.713	17.797	27.8057	6.87208	7.01646	25.964	5.47868	7.1288	4.35017	22.2209	10.3956	26.7534	1.30644	43.6853	47.2514	64.4484	7.4919	3.95991	81.6407	0	0	0	0	1.81846	19.473	2.66554	0	2.09185
USP48	90.4096	67.9574	59.4969	123.358	27.9188	56.9712	64.1481	55.3558	73.4138	84.693	85.1327	61.1818	157.838	41.4281	0	90.9201	77.089	61.7361	88.3533	75.4017	77.1583	273.235	134.071	78.578	140.878	145.592	97.3651	83.3978	140.539	117.12	96.1051	99.7184	107.727	77.5155	91.8048	153.084	134.575	102.315	64.1708	40.8203	44.642	71.6425	117.362	53.0213	83.6492	51.928	52.8403	65.3669	88.09
LDLRAD2	4.50648	0.90064	0	2.07907	3.10209	0	4.33433	16.6067	0	2.43586	0.492097	18.1239	0	0	8.19124	0.92943	1.0608	1.43991	10.8631	1.89574	12.5824	0.467401	15.4241	0.781686	0	0.877058	0	0.608743	0	5.68869	0.573749	0.0926376	0.167996	0	0.16423	0.166966	0.136833	0.195684	7.3106	0	22.321	0	0	0	10.0015	45.437	4.2335	11.3682	12.5511
HSPG2	199.437	21.6972	39.6646	58.9069	37.2251	26.9864	44.2102	315.528	220.241	157.581	14.7629	708.699	15.7838	8.87744	376.797	53.2919	57.5186	7.37953	294.752	116.619	1093.01	34.1592	33.2211	24.2695	17.1802	14.0329	77.8921	16.4361	33.6072	743.88	30.5899	4.34189	6.07936	5.22577	14.3702	7.5564	4.58391	4.0255	304.913	40.8203	212.05	28.657	117.362	31.8128	418.549	804.885	128.103	213.153	455.093
CELA3B	0.678395	0.245629	0	0	3.10209	0	0	0	24.4713	0	0.492097	0.439367	3.94596	0	0	1.31214	1.21563	1.25992	0	2.0792	2.07974	0.623201	0	0.818909	0	0.877058	0	1.21749	0	1.33851	0.931803	1.08346	1.29147	0.21774	1.14961	1.85094	2.39458	1.23001	0.507681	0	0	0	0	0	0	0	0	0	0.232427
CELA3A	0.306893	0.245629	0	0	0	0	0	0	0	0.374748	0.492097	0	0	1.97276	0	2.88397	2.34524	5.21967	2.89683	3.42457	3.63954	0.272651	0	0.335008	0	0	0	0	0	0.669257	0.267462	0.390689	0.356992	0.21774	0.492691	0.634471	0.752582	0.503188	0.203072	0	0	0	0	0	0	0	0	0	0
CDC42	113.394	159.741	39.6646	97.7161	183.023	152.923	120.494	154.996	171.299	117.296	105.309	155.865	169.676	184.454	139.251	87.5714	84.8816	129.952	175.258	150.62	134.351	50.5572	71.188	72.8457	103.081	74.5499	129.82	87.0502	51.9384	45.5095	85.6353	90.9339	86.581	65.3221	89.9161	140.891	127.186	84.0603	212.921	81.6407	200.889	171.942	117.362	106.043	100.622	123.329	156.012	133.576	99.014
WNT4	2.91818	23.3348	0	2.07907	0	0	0.866866	5.53558	0	2.62323	5.41306	0.109842	0	0	0	9.636	19.6106	0.719955	5.06945	5.56492	0.727908	0.311601	0	0.0744462	0	0	0	0	1.0184	0	0.979256	1.62317	20.6425	0.21774	3.7773	15.2845	29.8296	3.63413	1.1169	0	0	0	0	0	0	0	17.718	0	0.232427
ZBTB40	43.2073	24.2354	19.8323	22.1767	12.4084	16.4917	14.7367	16.6067	48.9425	23.2344	29.0337	18.014	19.7298	17.7549	0	24.0148	21.2849	16.9189	26.0715	15.4106	20.5894	46.2337	30.8481	37.7442	27.4883	24.5576	25.964	30.4371	26.4784	25.7664	25.8144	23.8643	49.9893	27.4353	24.6346	25.8416	23.3985	24.7121	24.8764	40.8203	11.1605	14.3285	117.362	26.5106	27.2769	25.964	22.5787	22.7363	19.2915
EPHA8	0.274589	0.736887	0	0	0	0	0.866866	0	0	0.187374	1.96839	0.329525	0	0	0	0.246026	0.659419	0	0	0.366918	0.415948	0.311601	0	0.967801	0	0	0	0.608743	0	0.669257	2.91188	12.933	118.836	1.95966	2.46346	92.7901	46.5917	22.0005	3.24916	0	0	0	0	0	0.606154	0	0.783981	0	0
C1QA	2.41207	3.84819	0	4.15813	3.10209	1.49924	985.627	3.69038	0	4.87172	0.492097	2.41652	0	0	32.765	0.546723	0.521801	295.361	1.44842	1.52883	2.07974	5.76461	8.30527	12.8048	8.5901	4.38529	6.49101	804.758	8.1472	5.35406	0.146673	0.237636	0.346492	135.87	0.16423	0.357784	0.273666	0.195684	0.203072	0	0	14.3285	0	281.013	0.909231	12.982	4.3903	2.84204	3.95126
C1QC	3.52658	4.66695	0	4.85115	12.4084	10.4947	1788.34	3.69038	24.4713	7.68233	2.46048	4.06414	15.7838	0	0	0.464715	0.326843	311.92	0	0.550377	0.415948	7.90687	7.1188	17.8671	18.8982	6.1394	25.964	1185.22	8.1472	4.01554	0.457274	0.54777	0.619485	451.593	0.410576	0.462734	0.957831	0.363413	1.1169	40.8203	0	0	0	286.315	1.51538	6.49101	6.27185	0	2.09185
C1QB	2.49822	3.68444	0	4.15813	9.30628	2.99848	1243.09	0	0	3.18535	1.47629	2.74604	0	0	8.19124	0.369038	0.194959	149.031	0	0.856142	0	4.47926	9.49173	8.15186	8.5901	7.89352	12.982	622.135	5.092	1.67314	0.237265	0.294024	0.199495	226.232	0.16423	0.305309	0.136833	0.307503	0.913825	81.6407	0	0	0	164.366	1.21231	12.982	4.54709	0	0.697282
EPHB2	4.99644	46.4239	39.6646	1.38604	0	1.49924	52.012	31.3683	0	66.8925	15.7471	3.51493	0	1.97276	32.765	15.0622	48.9633	15.659	228.125	42.5625	4.05549	1.59695	3.5594	3.83398	3.43604	3.50823	6.49101	19.4798	3.0552	2.67703	423.565	284.494	403.442	55.306	192.314	521.64	229.88	108.772	15.6366	0	33.4815	0	0	15.9064	23.9431	25.964	14.2685	14.2102	246.605
C1orf234	0.597634	0.327505	0	0.693022	0	1.49924	0	0	0	0.187374	0.492097	0.768892	7.89192	6.90468	0	1.83152	2.70649	1.25992	0	5.56492	2.70366	0.506351	0	0.967801	0	0	0	1.82623	0	0.334629	0.741991	0.664574	0.85048	0	0.492691	1.2594	1.43675	0.503188	0.609217	40.8203	55.8025	57.314	0	0	46.6739	90.8741	87.0219	28.4204	64.8472
KDM1A	39.2931	92.029	19.8323	53.3627	40.3272	56.9712	28.6066	55.3558	48.9425	52.652	75.2908	32.5131	74.9732	78.9106	65.5299	63.6113	99.7902	29.6981	59.385	70.9987	50.6416	78.9518	75.9339	54.2713	68.7208	48.2382	64.9101	27.3934	50.92	40.4901	77.1369	149.755	167.377	32.661	87.2063	131.693	116.034	148.133	52.4942	0	44.642	85.971	0	47.7192	60.6154	64.9101	48.7636	76.7351	54.8528
LUZP1	86.3447	17.2759	19.8323	13.8604	43.4293	52.4735	79.7517	57.2009	146.828	80.5707	12.7945	146.639	7.89192	56.2238	40.9562	114.812	80.3975	65.5159	83.2839	81.3947	222.428	17.4496	77.1203	50.5862	56.6947	35.9594	51.928	60.2655	187.386	176.684	44.843	46.0409	59.0506	72.072	33.8315	78.3452	72.932	42.8268	136.262	0	111.605	0	0	42.417	40.0062	58.4191	34.8088	76.7351	40.4424
HTR1D	0.522257	0	0	0	0	0	0.866866	0	0	0.374748	0	0.329525	0	0	0	0.273362	0.619281	0	2.89683	1.52883	0.519935	0.0389501	0	1.9356	0	0	0	0	0	1.67314	0.53061	0.285968	1.31247	0	0.0821152	0.0954091	0.684165	0.223639	0.913825	0	11.1605	0	0	0	0.303077	0	0.156796	0	0
HNRNPR	94.8946	189.298	118.994	109.497	127.186	130.434	74.5505	112.557	97.885	130.787	124.993	91.4981	134.163	153.876	90.1037	127.646	167.315	60.2962	159.326	111.176	108.874	153.775	131.698	76.7913	158.058	74.5499	136.311	65.1355	84.5272	78.9724	151.388	151.612	159.848	63.3624	139.842	142.155	126.092	141.508	123.671	81.6407	22.321	42.9855	0	95.4383	215.791	188.239	119.008	156.312	120.397
ZNF436	10.6551	10.2345	39.6646	2.77209	6.20418	5.99697	3.46746	16.6067	24.4713	10.8677	6.39725	17.5747	0	0	49.1475	5.86361	2.87851	0.359977	15.9326	5.32031	13.6223	1.7138	1.18647	3.5362	1.71802	3.50823	6.49101	1.21749	8.1472	5.68869	9.63294	10.6131	9.50228	0.21774	4.26999	19.1057	13.957	9.42079	37.5684	0	22.321	0	0	5.30213	9.09231	12.982	27.7529	8.52612	23.94
C1orf213	1.84674	2.21066	0	1.38604	0	0	0.866866	1.84519	0	1.68636	2.46048	0.878734	0	0	8.19124	0.697072	0.980528	0.539966	0	1.0396	0.207974	2.76546	8.30527	1.52615	0	0	0	1.82623	6.1104	0.669257	1.28123	2.04608	2.22595	1.0887	1.39596	1.96543	2.59983	1.64934	0.507681	0	22.321	0	0	0	2.72769	0	2.97913	0	1.16214
TCEA3	135.964	11.1352	99.1615	10.3953	21.7146	13.4932	11.2693	12.9163	146.828	33.1652	13.7787	13.7302	0	9.86382	8.19124	8.24186	8.09652	1.25992	24.6231	12.2306	3.22359	4.24556	1.18647	195.794	5.15406	4.38529	25.964	10.9574	16.2944	9.03497	8.21367	6.72227	4.0319	1.95966	3.61307	10.2279	16.4884	1.62138	2.84301	40.8203	0	14.3285	0	0	60.9185	12.982	346.206	5.68408	48.1125
ASAP3	71.0162	11.4627	79.3292	4.15813	6.20418	8.99545	6.06806	25.8327	146.828	58.8354	9.84193	15.7074	0	0	0	49.6288	26.4456	1.25992	144.117	24.0943	28.3884	3.42761	3.5594	83.7148	0	17.5412	38.946	3.04371	32.5888	23.0894	31.9833	23.2601	13.1772	1.0887	28.3297	6.4592	16.2147	11.6851	17.2611	0	0	28.657	0	0	16.9723	45.437	35.436	19.8943	97.1546
E2F2	2.85895	12.4452	19.8323	164.939	21.7146	8.99545	5.2012	7.38077	0	2.43586	3.44468	5.16256	284.109	33.537	0	4.01842	7.75821	8.45947	3.62104	4.46417	5.51131	232.142	41.5263	21.4405	130.57	10.5247	12.982	24.3497	11.2024	12.3813	7.48462	3.35912	0.787481	4.79029	7.22614	0.915928	1.29991	1.1741	2.43687	81.6407	0	0	0	0	27.2769	19.473	4.70389	2.84204	4.64855
ID3	11.4035	15.8021	0	9.00928	49.6335	5.99697	13.8699	448.382	24.4713	181.565	34.9389	347.1	7.89192	64.1149	131.06	176.1	136.953	10.9793	194.812	121.695	138.823	2.99916	5.93233	16.6015	24.0523	0.877058	136.311	29.2197	76.38	79.6416	16.2936	1.41776	1.31247	0.435481	6.56922	1.77938	2.12091	1.87298	236.072	0	55.8025	57.314	0	5.30213	33.3385	155.784	55.0355	144.944	74.6092
MDS2	0.662243	0.327505	0	0	0	0	0	0	0	2.99798	0.492097	0.65905	0	3.94553	0	1.23013	0.991996	0.899943	2.17262	1.0396	2.91163	0.701101	1.18647	0.893355	0	0	0	1.21749	6.1104	2.00777	0.694538	0.664574	0.755982	0.435481	1.31384	1.17353	1.16308	0.587052	0.609217	0	0	0	0	0	0.909231	0	0.470389	2.84204	0.232427
RPL11	319.244	404.387	198.323	460.166	511.845	289.354	312.939	444.691	195.77	304.67	280.003	326.34	355.136	640.162	294.885	316.129	314.268	311.02	460.596	354.626	248.321	219.25	338.143	381.128	171.802	138.575	525.771	152.794	122.208	77.2992	117.808	150.742	107.759	165.483	79.5696	69.9206	81.2104	101.588	322.479	326.563	457.581	544.483	234.724	387.055	804.366	428.406	1468.87	338.203	349.571
TCEB3	24.4545	21.0422	0	18.7116	9.30628	20.9894	23.4054	23.9875	24.4713	21.9227	22.6364	20.5404	15.7838	19.7276	16.3825	18.7526	18.1828	14.5791	27.5199	15.7163	19.6535	19.0466	13.0511	27.5079	17.1802	11.4017	19.473	19.4798	20.368	14.0544	19.2357	18.2698	18.2906	9.58057	17.5727	22.4641	17.8567	18.4223	25.6886	0	33.4815	57.314	0	5.30213	23.0339	19.473	32.7704	8.52612	21.8482
PITHD1	22.0909	23.0073	39.6646	56.8278	15.5105	31.4841	23.4054	16.6067	0	15.9268	15.255	12.6318	134.163	19.7276	40.9562	12.8343	16.5486	11.1593	9.4147	14.5544	8.7349	64.8519	18.9835	21.5894	22.3343	28.9429	19.473	26.7847	9.1656	16.0622	17.1693	17.3716	26.5434	8.05639	15.0271	30.9984	39.8868	23.4821	22.0333	40.8203	0	0	0	5.30213	19.7	12.982	19.9131	2.84204	18.8266
LYPLA2	20.2442	15.3109	19.8323	9.70231	15.5105	13.4932	15.6036	11.0712	0	12.9288	10.334	15.5975	11.8379	15.7821	8.19124	9.95037	14.7022	8.99943	13.0357	15.8386	10.9186	10.0881	7.1188	25.7956	5.15406	12.2788	19.473	9.13114	5.092	6.69257	6.35006	7.00824	7.18183	2.83062	4.76268	8.53912	11.8361	4.8921	14.5197	0	11.1605	0	0	5.30213	13.3354	6.49101	13.7981	2.84204	7.6701
GALE	27.0012	13.7552	99.1615	7.62324	12.4084	19.4901	23.4054	18.4519	0	9.93081	8.85774	10.2153	0	2.95915	0	4.10043	7.34536	7.55952	1.44842	16.389	5.82327	9.11432	7.1188	39.6426	8.5901	14.91	0	13.3923	6.1104	17.0661	8.63212	10.6654	12.3162	14.5886	8.95056	18.7956	23.33	10.3433	6.59985	0	0	0	0	0	9.09231	6.49101	24.4602	8.52612	5.57826
HMGCL	34.7974	12.609	19.8323	22.8697	18.6126	16.4917	27.7397	14.7615	0	23.7965	16.7313	19.7715	3.94596	13.8094	40.9562	18.903	16.1873	17.9989	10.8631	23.9108	17.6778	22.0847	28.4752	121.161	15.4622	24.5576	12.982	35.3071	32.5888	24.4279	23.1829	14.0447	10.4683	22.2095	12.0709	15.0031	25.5878	11.126	16.5504	0	22.321	0	0	53.0213	16.6692	19.473	19.4427	14.2102	13.4808
FUCA1	22.6293	13.1821	19.8323	20.7907	3.10209	14.9924	63.2812	14.7615	0	15.7394	16.2392	7.35939	11.8379	4.93191	0	8.61089	4.91411	25.0184	10.1389	13.6371	2.70366	11.6071	4.74587	25.3117	17.1802	7.01646	0	127.836	1.0184	9.70423	10.1118	9.51348	13.7127	26.5643	7.5546	22.4879	33.2504	10.7347	10.8644	0	11.1605	0	0	58.3234	10.9108	12.982	11.6029	14.2102	18.3618
CNR2	0.759157	0.491258	19.8323	2.07907	71.3481	0	6.06806	1.84519	0	0.374748	0	0.549208	7.89192	36.4961	8.19124	1.18912	1.41632	4.85969	4.34525	1.89574	1.45582	1.90855	2.37293	0.930578	127.133	0.877058	0	4.86994	0	2.3424	0.871408	1.01096	0.997476	0.870961	0.985382	1.69828	1.50516	1.00638	0.406145	0	0	28.657	0	5.30213	0.303077	0	0.470389	0	0.464855
PNRC2	11.3766	12.1996	19.8323	17.3255	18.6126	8.99545	7.80179	22.1423	24.4713	11.4298	11.8103	11.5334	19.7298	31.5642	16.3825	11.2215	12.6436	15.299	25.3473	14.004	11.5425	11.9966	10.6782	7.59352	10.3081	8.77058	6.49101	6.69617	7.1288	10.0389	10.3189	5.28437	5.35487	4.57255	6.89768	6.36379	5.88382	5.89848	28.3286	0	22.321	42.9855	0	10.6043	24.2462	6.49101	20.2267	19.8943	20.2212
SRSF10	4.87799	6.63199	19.8323	2.07907	6.20418	5.99697	1.73373	5.53558	0	3.5601	2.46048	5.93145	7.89192	14.7957	0	3.79973	4.8281	1.97988	5.06945	2.14036	2.28771	8.37427	3.5594	3.68509	5.15406	1.75412	0	3.65246	4.0736	3.01166	5.22413	4.4305	4.2524	2.39514	5.00903	6.91716	4.17341	5.08779	4.7722	0	0	14.3285	0	5.30213	5.15231	6.49101	2.97913	5.68408	3.25398
MYOM3	7.94692	0.573135	0	2.07907	0	0	0	0	0	0.936869	1.47629	1.3181	0	0.986382	0	0.57406	6.18707	0.539966	0	5.74838	0.831895	0.584251	2.37293	2.04727	0	0.877058	0	0.608743	0	1.33851	0.289031	0.483327	1.00798	0.21774	0.246346	1.03042	1.29991	0.335458	0.203072	0	33.4815	0	0	0	23.3369	12.982	717.186	8.52612	6.27554
IL22RA1	0.134602	0	0	0	0	0	0	0	0	0.187374	0	0	0	0	0	0.150349	0.596344	0.359977	0	0.672683	0.103987	0.817952	0	27.7312	0	0.877058	6.49101	0	0	0	0.0949058	0.120832	0.136497	0	0	0.262375	0.136833	0	0.101536	0	0	0	0	0	0	0	0	0	0
IFNLR1	6.69781	0.736887	0	0	9.30628	0	0.866866	0	0	0.374748	14.7629	0.439367	7.89192	5.91829	0	0.779081	11.4108	2.87982	0	14.6156	0.727908	0.934802	0	30.2996	41.2325	0	0	3.04371	2.0368	1.67314	0.440018	0.571937	1.01848	3.04836	0.574806	12.7753	7.4574	0.391368	0.406145	0	0	0	0	0	0.606154	0	0.156796	0	0
GRHL3	0.360734	0	0	0.693022	0	0	0	1.84519	0	0	0	0.109842	0	0	0	0.28703	0.384183	0	0	47.2713	0.519935	0.311601	1.18647	0.818909	0	0	0	0	0	0.669257	0.974942	0.136943	0.125997	0.653221	0.16423	0.410259	0.684165	0.167729	0.406145	0	0	0	0	0	0	0	0.783981	0	0
STPG1	4.7703	0.982516	0	9.70231	3.10209	14.9924	4.33433	1.84519	0	5.99596	2.46048	10.7645	27.6217	4.93191	49.1475	6.57435	8.1768	2.87982	12.3115	12.3529	12.2705	21.2278	5.93233	6.40238	3.43604	13.1559	0	10.3486	6.1104	9.03497	7.19127	10.1136	11.1402	5.44351	4.68057	39.8476	44.9497	12.999	1.01536	0	0	0	0	0	1.81846	0	1.25437	2.84204	2.09185
NIPAL3	21.9132	18.9953	0	45.0464	49.6335	82.4583	12.1361	11.0712	24.4713	23.047	34.9389	21.7487	11.8379	41.4281	40.9562	22.115	18.8651	12.4192	34.762	37.976	25.0608	72.4471	37.9669	29.4063	56.6947	99.1075	58.4191	20.6973	24.4416	22.0855	18.2521	55.5786	12.7152	16.766	39.4153	51.416	107.961	61.7523	7.00599	0	11.1605	42.9855	0	15.9064	4.84923	38.946	5.17428	5.68408	9.06467
RCAN3	1.67445	34.6337	0	2.07907	40.3272	31.4841	5.2012	12.9163	24.4713	8.6192	11.3182	5.93145	0	112.448	16.3825	29.072	5.8717	8.63946	11.5873	26.4793	9.46281	1.51905	7.1188	30.1135	18.8982	32.4511	0	6.69617	12.2208	1.33851	10.4051	34.6263	10.0168	6.96769	2.95615	31.9	75.6003	29.7719	4.16298	0	0	28.657	117.362	10.6043	3.03077	45.437	2.19515	5.68408	0.464855
NCMAP	2.00827	1.47377	19.8323	0.693022	0	1.49924	1.73373	0	0	1.68636	7.38145	0.988575	0	1.97276	8.19124	1.98187	2.44272	1.43991	1.44842	3.05765	3.11961	1.98645	3.5594	41.1688	6.87208	1.75412	6.49101	1.21749	2.0368	2.00777	1.61771	1.71178	1.75346	1.0887	1.56019	2.58082	6.97849	1.50956	0.507681	0	11.1605	0	0	0	1.21231	12.982	2.50874	2.84204	0.929709
SRRM1	56.716	67.0567	158.658	71.3812	77.5523	91.4538	65.0149	79.3432	97.885	75.1369	69.3856	70.4085	130.217	113.434	106.486	80.5734	94.2167	97.0139	76.766	98.2729	72.9988	107.113	102.036	63.4282	99.6452	85.0746	64.9101	71.2229	70.2696	69.2681	67.711	66.9327	66.1694	75.9914	62.4076	84.7662	74.4372	63.0941	80.0105	40.8203	78.1235	100.3	117.362	58.3234	96.0754	90.8741	72.9103	90.9452	71.5876
CLIC4	11.0212	83.8414	733.795	39.5022	18.6126	211.393	45.077	158.686	24.4713	177.63	97.4351	227.043	47.3515	38.4689	204.781	178.259	148.518	84.4147	186.121	71.0598	345.549	75.2905	80.6797	129.053	106.517	232.42	181.748	37.742	260.71	182.373	115.647	100.484	93.8363	30.2659	87.0421	103.428	99.7513	64.6876	337.608	0	55.8025	28.657	0	26.5106	98.1969	155.784	102.388	207.469	116.214
RUNX3	0.107682	0.245629	0	4.85115	210.942	8.99545	33.8078	0	0	0.374748	0	0.109842	0	225.882	8.19124	1.12078	0.194959	31.318	0.724208	0.305765	0.623922	1.90855	36.7805	0.967801	125.415	6.1394	0	34.6983	0	0.334629	0.129417	0.0926376	0.0629985	1.0887	0	0.157425	0.136833	0.0838646	5.99063	0	0	143.285	0	15.9064	0	0	0.470389	0	0
SYF2	24.6268	42.9032	0	25.6418	27.9188	29.9848	22.5385	38.749	0	25.8576	34.4468	23.8356	59.1894	51.2919	16.3825	33.2818	36.549	17.2789	39.1072	36.1414	28.2844	13.2041	17.797	21.2916	25.7703	12.2788	19.473	15.2186	8.1472	9.03497	14.3265	17.0171	19.435	10.4515	12.9742	15.4658	15.6674	21.05	34.3192	0	44.642	42.9855	0	15.9064	47.8862	45.437	40.9238	25.5784	19.7563
C1orf63	99.6272	46.7514	79.3292	305.623	102.369	115.442	135.231	44.2846	73.4138	110.363	69.8777	112.917	228.866	92.7199	204.781	73.2336	59.2331	78.2951	65.1787	87.3265	94.4201	251.773	167.292	106.123	152.904	225.404	473.843	155.229	145.631	147.571	88.7801	62.1035	56.8667	106.475	71.7687	97.5272	150.311	59.4041	69.2477	163.281	78.1235	85.971	117.362	79.5319	51.5231	51.928	33.7112	68.2089	58.8041
RHD	1.47524	0.736887	0	511.45	3.10209	62.9682	0.866866	0	0	2.43586	1.47629	0.768892	465.623	0	0	0.724409	0.768367	2.15986	1.44842	0.856142	1.45582	522.437	60.5098	15.8198	34.3604	107.001	0	23.741	14.2576	13.7198	1.20358	0.946515	0.965977	0.653221	1.23173	1.58856	1.84725	1.28592	1.01536	408.203	0	0	234.724	0	0.606154	6.49101	0.940778	2.84204	1.39456
TMEM50A	73.019	75.2444	59.4969	94.944	89.9607	188.904	58.08	92.2596	97.885	93.6869	48.7176	116.652	23.6758	44.3872	90.1037	33.0358	26.9387	32.5779	44.1767	29.4758	61.8722	52.4658	41.5263	35.2875	54.9766	73.6728	25.964	42.612	57.0304	28.7781	64.8897	87.4378	69.3299	40.9352	62.9002	94.746	120.687	70.7538	136.668	0	100.445	14.3285	117.362	42.417	43.6431	12.982	57.2306	51.1567	77.6307
RHCE	3.32737	3.76631	0	614.71	0	34.4826	3.46746	3.69038	0	3.93485	5.90516	2.08699	879.949	0.986382	16.3825	2.73362	2.67782	4.13974	2.89683	2.75189	2.59967	792.478	78.3068	32.1608	51.5406	71.0417	6.49101	37.1333	22.4048	17.7353	2.77384	4.63591	3.70641	1.74192	3.53095	5.53373	6.56799	4.8921	1.72611	530.664	11.1605	0	234.724	0	0.909231	0	3.13593	5.68408	3.95126
TMEM57	44.9087	119.539	39.6646	561.348	65.1439	130.434	45.9439	44.2846	24.4713	50.2162	80.7038	50.7469	678.705	44.3872	188.399	55.9571	60.0473	41.3974	58.6608	51.7966	78.6141	344.358	147.122	80.4764	121.979	105.247	51.928	88.8764	77.3984	73.9529	57.5992	204.705	246.009	69.0237	118.656	228.886	184.588	260.539	70.8722	408.203	66.963	71.6425	117.362	47.7192	38.7939	58.4191	52.2132	45.4726	45.5558
LDLRAP1	6.35861	2.12879	19.8323	2.77209	6.20418	19.4901	4.33433	18.4519	0	16.3015	0.984193	10.5448	3.94596	26.6323	24.5737	6.17798	2.99319	5.03968	2.17262	5.93184	9.67078	8.41322	5.93233	7.4074	12.0261	36.8364	6.49101	2.43497	18.3312	12.3813	2.35108	2.94829	2.70894	6.09673	0.492691	0.376866	0.342083	1.09024	22.1349	0	11.1605	14.3285	0	5.30213	15.1538	12.982	4.70389	8.52612	6.04311
MAN1C1	6.4286	2.86567	237.988	3.46511	21.7146	0	58.9469	12.9163	0	41.9717	6.88935	32.9525	3.94596	33.537	57.3387	65.7298	6.6458	31.678	21.7262	6.05415	40.2429	2.45385	9.49173	4.46677	20.6162	6.1394	97.3651	104.704	90.6376	512.316	26.2501	145.763	110.961	100.814	15.1913	4.46515	11.2887	42.2398	18.175	0	89.284	114.628	0	111.345	70.92	19.473	8.467	25.5784	28.3561
SEPN1	21.3425	50.2721	0	17.3255	27.9188	118.44	45.9439	134.699	48.9425	61.4586	25.0969	99.2969	3.94596	22.6868	32.765	45.5694	22.5521	35.4578	55.0398	38.8933	152.445	12.3472	23.7293	25.1628	15.4622	62.2711	71.4011	38.9595	38.6992	78.9724	107.904	99.2914	40.1511	54.6528	89.6698	49.6414	54.6648	41.7087	183.476	40.8203	312.494	57.314	0	26.5106	125.474	97.3651	33.3976	79.5771	95.0628
RP1-317E23.6	0.215364	0.245629	0	0	0	0	0	3.69038	0	0.749495	0	0.329525	0	0	0	0.300698	0.0917453	0	0	0.061153	1.24784	0.1558	0	0.0744462	0	1.75412	0	0	0	1.33851	0.647085	0.54777	0.325492	0	0.328461	0.405489	0.273666	0.167729	0.913825	0	0	0	0	0	0.606154	0	0	0	0.464855
MTFR1L	65.449	32.3412	59.4969	14.5535	21.7146	40.4795	26.006	35.0586	24.4713	31.8535	35.923	23.0668	0	7.89106	0	10.1281	9.78808	8.27948	17.381	9.72333	5.61529	7.94582	7.1188	38.9726	6.87208	27.1888	19.473	14.6098	16.2944	15.0583	12.8166	13.7829	16.1801	11.3225	13.7954	19.2249	21.2775	14.2011	13.7074	0	0	0	0	15.9064	15.4569	32.455	39.8263	14.2102	11.6214
AUNIP	5.93327	4.91258	0	14.5535	0	32.9833	4.33433	0	24.4713	2.43586	1.96839	3.51493	23.6758	1.97276	0	2.02288	4.07693	3.59977	1.44842	2.62958	1.66379	31.3548	9.49173	4.69011	10.3081	14.91	0	4.86994	2.0368	3.68092	3.86094	2.16692	2.05795	3.70158	3.7773	3.53014	3.48924	1.84502	2.03072	0	0	0	0	0	1.81846	0	3.44952	5.68408	2.09185
PAQR7	13.7887	4.66695	0	0.693022	3.10209	11.9939	11.2693	7.38077	24.4713	5.24647	2.95258	5.93145	0	0	0	4.23711	4.47258	7.01956	4.34525	12.8421	3.01562	1.558	8.30527	13.0281	3.43604	7.01646	0	3.04371	8.1472	7.69646	2.98953	1.49429	1.87946	4.35481	3.53095	4.24571	8.55207	1.59343	3.55377	0	0	0	0	5.30213	0.909231	12.982	2.82233	0	6.97282
STMN1	54.3955	690.463	59.4969	97.7161	117.88	100.449	64.1481	308.147	146.828	68.7662	144.184	100.725	130.217	254.487	155.634	109.481	287.713	83.5147	143.393	107.14	130.816	66.6046	100.85	65.6244	115.107	31.5741	123.329	31.6546	33.6072	33.1282	185.959	344.423	352.403	77.7333	141.813	360.646	544.048	362.407	209.977	122.461	189.729	100.3	0	100.74	299.743	363.496	248.052	167.68	87.3927
PAFAH2	28.1157	9.49766	19.8323	4.85115	40.3272	4.49773	15.6036	7.38077	0	10.8677	19.6839	5.05272	7.89192	3.94553	8.19124	4.96152	8.23414	9.17942	5.06945	9.90679	6.13523	6.46571	13.0511	21.4777	37.7964	2.63117	0	18.2623	14.2576	7.0272	10.1592	6.03756	3.41242	25.9111	10.5107	2.97199	5.61016	4.80824	8.22443	40.8203	22.321	14.3285	0	15.9064	10.9108	12.982	108.503	5.68408	11.1565
EXTL1	0.899143	0.327505	0	0	0	0	0	14.7615	0	1.31162	0	0.109842	0	0	0	0.915762	0.452992	0	0	0.122306	0.103987	0.1558	0	0.0744462	0	0	0	0	0	0	0.552179	0.567909	0.986977	0.435481	7.22614	1.32142	2.18933	0.335458	0.101536	0	0	0	0	0	0	19.473	2.66554	0	0.929709
SLC30A2	0.134602	0.0818764	59.4969	0	0	0	0	0	0	0	0	0	0	0	0	0.259694	0.56194	0.359977	0	4.83109	0.727908	0.19475	0	0.148892	0	0	0	0.608743	0	0	0.0992197	0.112776	0.125997	0.435481	0.16423	0.114491	0.342083	0.0559097	0.101536	0	0	0	0	0	0.303077	0	0.627185	0	0
TRIM63	0.468416	0.736887	0	0	0	2.99848	1.73373	1.84519	0	0.936869	0	0.329525	0	0	0	0.246026	0.447258	0	0	0.122306	1.03987	0.623201	0	1.15392	0	0.877058	0	1.21749	1.0184	0.334629	0.172556	0.261802	0.146997	0.21774	0.328461	0.438882	0.342083	0.335458	0.203072	0	0	0	0	0	1.51538	0	69.7743	0	1.16214
PDIK1L	6.56859	13.4277	0	18.0186	3.10209	4.49773	10.4024	22.1423	0	5.05909	8.36564	6.81019	39.4596	6.90468	0	4.87951	10.3902	5.21967	8.69049	8.25566	5.51131	22.8247	11.8647	11.7997	5.15406	7.01646	6.49101	10.3486	6.1104	7.0272	12.4068	14.0366	21.934	9.58057	12.8921	26.9674	32.9768	16.4095	9.64593	0	11.1605	0	0	10.6043	8.78923	0	6.27185	5.68408	8.13496
FAM110D	0.183059	0.655011	0	0	3.10209	0	0.866866	0	0	0.374748	0	6.37082	0	0	0	0.451047	0.751165	0	0	0	15.702	0.0389501	0	0.148892	0	0	0	0	0	1.33851	0.116475	0.26583	0.241494	0	0.0821152	0.491357	0.410499	0.335458	28.9378	0	11.1605	0	0	0	0.606154	0	0.470389	2.84204	0.232427
ZNF593	9.20679	4.83071	0	6.2372	9.30628	13.4932	6.93493	7.38077	24.4713	5.24647	5.41306	4.61335	15.7838	6.90468	0	5.83627	9.01971	5.75964	8.69049	13.7594	5.71928	4.05081	5.93233	11.837	0	5.26235	6.49101	4.86994	1.0184	1.00389	1.79027	1.74803	1.56446	1.95966	1.6423	1.5981	2.463	1.34183	5.48295	0	0	0	0	15.9064	7.27385	6.49101	13.7981	2.84204	5.81068
CNKSR1	0.559945	5.24009	19.8323	0.693022	0	1.49924	0	0	0	0.562121	2.95258	0.329525	0	0	0	2.10489	4.28909	1.25992	1.44842	20.2416	0.935882	0.662151	4.74587	5.36013	1.71802	1.75412	6.49101	0.608743	1.0184	0.334629	3.55465	4.2573	7.11883	0.435481	5.66595	13.6769	11.9045	5.64688	0.406145	0	0	0	0	0	0.606154	0	2.19515	2.84204	0.697282
CEP85	11.2797	11.4627	0	18.0186	15.5105	20.9894	13.003	9.22596	48.9425	8.24445	7.87354	7.57908	39.4596	15.7821	0	7.23042	13.1024	12.5992	10.1389	7.88874	8.7349	73.8883	35.594	18.4627	39.5145	25.4347	6.49101	23.1322	9.1656	10.0389	14.279	16.3163	12.6207	14.8063	16.9978	33.398	32.6347	11.3497	4.46759	0	0	14.3285	0	10.6043	13.9415	6.49101	22.5787	17.0522	12.0862
SH3BGRL3	27.2166	41.4294	59.4969	20.0976	117.88	328.334	135.231	25.8327	0	37.4748	18.6997	53.6027	27.6217	269.282	204.781	24.5342	25.769	200.507	75.3176	26.2958	65.6157	13.3988	20.1699	22.1478	37.7964	129.805	45.437	74.2666	13.2392	8.70035	22.126	34.1108	24.8319	41.1529	18.0653	36.9663	46.4548	20.463	115.345	40.8203	133.926	85.971	234.724	174.97	27.8831	45.437	28.2233	62.5249	36.4911
UBXN11	8.2915	7.45075	19.8323	2.77209	9.30628	10.4947	15.6036	9.22596	0	7.49495	14.7629	4.50351	0	6.90468	16.3825	12.2739	33.0742	28.0782	13.0357	36.0803	8.21497	15.58	39.1534	9.23133	18.8982	16.6641	25.964	113.835	2.0368	12.3813	19.2184	6.20269	6.15285	8.70961	5.25537	18.1611	19.4303	5.31142	5.38142	40.8203	44.642	0	0	31.8128	6.36462	0	5.17428	8.52612	6.74039
CD52	0.161523	0.0818764	0	0.693022	93.0628	0	10.4024	0	0	0.187374	0.492097	0	31.5677	245.609	8.19124	0.259694	0.464461	5.57965	0.724208	3.85264	0.207974	0.272651	27.2887	0.781686	17.1802	0	0	4.86994	0	0	0.0474529	0.0926376	0.125997	0	0.0821152	0.133573	0	0.0279549	0	0	0	57.314	0	10.6043	0	6.49101	0	0	0
AIM1L	5.94404	4.91258	39.6646	6.2372	0	4.49773	1.73373	9.22596	0	5.05909	1.96839	4.72319	7.89192	5.91829	0	6.58802	7.16187	6.2996	8.69049	16.2055	8.52693	4.94666	3.5594	9.26856	3.43604	2.63117	0	3.04371	1.0184	4.01554	4.71509	6.79074	6.69884	2.83062	5.74806	15.0985	17.1041	5.25551	3.75684	0	11.1605	0	0	5.30213	4.84923	6.49101	7.05583	14.2102	6.27554
ZNF683	0.484568	0.245629	0	0	6.20418	0	0.866866	0	24.4713	0	0	0	0	8.87744	0	1.44882	1.62274	0.539966	0	2.01805	0.311961	1.05165	2.37293	0.446677	1.71802	0.877058	0	0	1.0184	0	1.2424	2.54552	4.1579	0.653221	1.31384	4.66551	3.42083	1.11819	0.101536	0	0	0	0	0	0.303077	0	0.313593	0	0.464855
LIN28A	0.113066	0.0818764	0	0	0	0	0	0	0	0	0	0	0	0	0	0.218689	0.430056	0	0	0.978448	0.207974	0.272651	0	0.111669	0	0	0	0	0	0	0.168242	0.269857	0.461989	0	0.0821152	0.348243	0.136833	0.335458	0	0	0	0	0	0	0	0	0	0	0
DHDDS	28.821	21.5335	39.6646	10.3953	12.4084	35.9818	28.6066	14.7615	0	20.6111	26.5732	16.0369	7.89192	22.6868	8.19124	18.6159	22.0762	19.2588	21.002	30.4542	19.8615	37.47	37.9669	25.2373	17.1802	28.0658	12.982	36.5246	31.5704	26.7703	24.9085	28.5123	25.6614	30.9191	25.4557	48.5823	46.8653	23.4262	15.9412	40.8203	33.4815	0	117.362	10.6043	23.0339	25.964	14.5821	36.9465	19.2915
HMGN2	7.8177	6.71386	0	11.0883	6.20418	8.99545	8.66866	9.22596	0	8.6192	11.8103	6.15113	31.5677	16.7685	16.3825	18.4519	15.4132	17.0989	21.7262	14.4321	12.4784	21.4225	13.0511	7.8913	17.1802	18.4182	6.49101	7.91366	12.2208	6.35794	9.26195	6.59741	5.91136	9.14509	7.14402	4.21231	4.17341	5.11574	6.59985	0	0	14.3285	0	15.9064	14.2446	19.473	4.2335	11.3682	9.06467
RPS6KA1	19.1135	8.59702	0	13.1674	40.3272	31.4841	65.0149	0	48.9425	3.93485	3.44468	13.6204	31.5677	43.4008	24.5737	3.82706	10.0633	48.057	2.89683	13.9429	12.5824	21.033	34.4075	4.61567	56.6947	17.5412	0	52.9606	4.0736	10.3735	1.65222	19.3452	9.17678	35.0562	2.29923	6.72157	18.6093	4.16527	7.51368	0	11.1605	28.657	0	47.7192	10.6077	6.49101	1.09757	2.84204	0.697282
ARID1A	134.382	188.725	138.826	173.255	164.411	193.402	216.716	215.887	146.828	158.706	145.661	141.696	311.731	186.426	212.972	203.354	248.934	201.047	145.566	185.294	173.554	368.624	263.396	179.937	350.476	212.248	155.784	240.453	217.938	205.797	217.649	213.671	195.925	219.918	238.463	185.409	180.756	183.608	168.956	326.563	100.445	257.913	117.362	222.689	130.02	155.784	103.799	170.522	145.267
PIGV	8.21074	4.25757	0	7.62324	9.30628	2.99848	3.46746	9.22596	0	7.49495	8.36564	3.73462	3.94596	0.986382	0	2.33724	2.71795	1.79989	7.96628	4.09725	1.14386	8.49112	3.5594	10.8692	0	2.63117	6.49101	1.82623	7.1288	3.68092	4.41312	2.54552	4.3469	0.870961	3.61307	2.82411	4.31024	2.43207	3.45223	0	0	0	0	0	5.15231	0	4.3903	5.68408	10.6917
ZDHHC18	8.83529	24.8904	39.6646	6.2372	6.20418	7.49621	13.003	11.0712	0	16.4889	13.2866	13.8401	11.8379	25.6459	0	11.7956	12.8443	13.8591	15.9326	10.5795	13.9342	10.7113	7.1188	34.5431	15.4622	3.50823	6.49101	20.6973	25.46	14.0544	15.4222	22.3861	23.1205	0.435481	17.4905	40.0384	42.8288	18.0309	25.8917	0	11.1605	0	0	15.9064	20.0031	6.49101	9.56457	19.8943	25.567
GPN2	21.0626	16.8665	39.6646	12.4744	6.20418	20.9894	17.3373	9.22596	0	17.8005	14.7629	15.268	7.89192	15.7821	0	14.4198	14.49	12.4192	21.7262	16.6336	14.2462	21.2667	21.3564	27.3218	15.4622	14.0329	12.982	12.7836	9.1656	12.3813	12.2127	11.7771	14.0487	5.44351	12.7279	17.6984	17.0357	12.7195	15.0274	0	33.4815	0	0	10.6043	14.5477	6.49101	16.934	8.52612	15.5726
GPATCH3	4.51725	3.35693	0	2.77209	3.10209	8.99545	4.33433	7.38077	0	5.05909	3.44468	3.18541	3.94596	9.86382	0	4.96152	6.17561	7.37953	0.724208	4.40302	3.9515	7.67316	4.74587	6.62572	6.87208	3.50823	6.49101	6.69617	1.0184	4.01554	4.08095	3.08121	4.1894	3.48384	3.53095	6.11572	4.99441	2.93526	6.39678	0	0	0	0	0	4.24308	0	4.86068	2.84204	4.18369
NUDC	80.8583	64.928	39.6646	58.2138	58.9398	68.9651	48.5445	66.4269	73.4138	39.3485	56.099	41.63	23.6758	36.4961	114.677	26.4067	45.8153	39.9575	37.6588	33.9399	32.2359	74.3167	42.7128	90.9361	63.5667	31.5741	77.8921	33.4808	23.4232	22.0855	42.0692	33.3133	37.9776	21.5563	31.1217	41.8035	45.0181	32.3717	53.8142	40.8203	22.321	0	117.362	42.417	47.28	123.329	53.3107	39.7885	34.6317
NR0B2	3.98423	0.655011	0	0	0	1.49924	2.6006	0	0	2.24849	1.47629	1.09842	0	0	0	0.109345	0.103213	0	0	0.428071	0.103987	1.4022	0	34.5431	0	0.877058	0	1.82623	3.0552	1.67314	0	0	0	0	0	0	0	0	0	0	0	0	0	0	0	0	0.470389	0	0.232427
C1orf172	1.21142	0.163753	0	0	0	1.49924	0	1.84519	0	0.187374	0.492097	0.988575	0	0	0	0.28703	1.38191	0.359977	0.724208	9.41756	0.623922	0.1558	0	4.95068	0	0.877058	0	0	0	0	0.168242	0.213469	0.283493	0	0.16423	0.305309	0.342083	0.0559097	0	0	0	0	0	0	0.303077	0	0.156796	0	0.697282
TRNP1	0.850686	11.8721	0	0.693022	0	2.99848	4.33433	18.4519	0	2.99798	5.90516	0.988575	0	0	0	3.12999	2.95305	1.07993	15.2084	21.2201	0.519935	1.67485	2.37293	55.5369	1.71802	0.877058	19.473	35.3071	3.0552	4.35017	2.65736	9.67056	14.8676	1.30644	9.93594	18.6859	44.9497	9.86807	4.97527	0	0	0	0	0	0	0	1.41117	5.68408	1.16214
FAM46B	0.139986	0	0	0	0	0	0	1.84519	0	0.187374	0.492097	0.219683	0	0	0	0.300698	1.37045	0.719955	0	0.917295	0.311961	0.0779001	0	0.297785	0	0	0	0	0	1.00389	0.120789	0.132915	0.136497	0	1.23173	0.233752	0.410499	0.139774	0	0	0	0	0	0	1.21231	0	0	0	0
SLC9A1	22.457	9.66141	138.826	7.62324	21.7146	157.42	18.2042	18.4519	48.9425	25.6702	26.0811	38.3348	19.7298	41.4281	188.399	28.498	18.4695	21.5986	34.762	49.3505	27.6605	15.6579	13.0511	13.5492	32.6424	343.807	19.473	38.9595	32.5888	51.5328	13.8735	12.6833	19.645	18.7257	11.3319	30.1588	37.0133	13.2786	97.9824	40.8203	33.4815	28.657	586.81	10.6043	11.5169	19.473	8.93739	45.4726	37.8857
WDTC1	50.6374	37.9906	59.4969	40.1953	46.5314	40.4795	50.2782	29.5231	73.4138	41.9717	28.0495	36.0281	55.2434	47.3464	106.486	29.072	50.0299	46.2571	26.0715	35.7134	40.8669	76.6148	35.594	59.222	82.465	39.4676	19.473	60.2655	40.736	78.3031	48.924	43.3705	54.9347	32.2256	39.7438	60.3415	60.7539	54.2883	39.4976	40.8203	66.963	42.9855	0	26.5106	32.7323	51.928	41.551	39.7885	24.6373
TMEM222	19.3343	26.9373	19.8323	22.8697	43.4293	29.9848	22.5385	22.1423	0	20.7985	28.5416	21.7487	55.2434	19.7276	8.19124	18.6296	20.3617	16.019	21.002	18.9574	21.6293	40.1186	15.4241	23.8972	25.7703	24.5576	6.49101	23.1322	18.3312	14.389	25.5901	24.0133	31.6568	15.4596	30.9574	40.7206	50.6282	23.9014	26.8055	0	0	0	0	21.2085	24.8523	6.49101	21.9515	25.5784	28.821
SYTL1	0.220748	0.245629	0	0.693022	58.9398	1.49924	4.33433	0	0	0.187374	4.42887	0.439367	0	63.1285	0	0.451047	3.23976	3.95975	0	19.2632	0.935882	1.67485	34.4075	2.75451	58.4127	1.75412	6.49101	8.5224	2.0368	1.00389	0.211381	0.277913	0.377991	0	0.16423	1.11629	0.820998	0.223639	0.304608	0	0	100.3	0	0	0.909231	0	0.156796	0	0
MAP3K6	0.996057	0.982516	0	0.693022	0	2.99848	3.46746	1.84519	0	10.1182	1.96839	28.9982	0	0	0	3.52637	1.43352	1.07993	7.96628	1.71228	7.79902	0.467401	2.37293	1.4517	0	0	6.49101	1.82623	7.1288	30.4512	0.953372	1.02707	0.787481	0	0.328461	0.868223	0.820998	0.615007	6.90446	0	0	0	0	10.6043	4.54615	0	3.91991	11.3682	9.29709
FCN3	1.31372	0.982516	0	1.38604	0	0	2.6006	0	0	2.43586	0.984193	85.4568	0	0	0	0.0956766	0.235097	0	0	0.061153	3.84752	2.99916	4.74587	6.47682	3.43604	2.63117	0	3.65246	4.0736	419.959	0.306287	0.535687	0.472489	0	0.328461	1.48838	0.957831	0.363413	1.31997	0	0	0	0	0	0.606154	0	0.940778	0	0.232427
GPR3	0.7107	0.327505	0	0	0	1.49924	3.46746	0	0	0.187374	5.41306	5.16256	0	0.986382	0	1.42148	2.04133	0	0	1.0396	0.623922	0	0	0.0372231	0	0	0	0	0	1.00389	0.759247	2.67038	2.60394	0	1.97076	2.14193	2.18933	0.810691	1.01536	0	0	0	0	0	2.42462	0	0.470389	0	0
WASF2	113.061	92.1928	59.4969	183.651	111.675	151.423	319.007	138.389	73.4138	148.025	64.4646	230.228	370.92	185.44	73.7212	130.735	109.234	205.187	296.925	102.003	244.577	170.134	174.411	90.8989	235.369	156.116	136.311	321.416	145.631	232.232	108.792	57.4716	31.2788	399.118	44.6707	75.6594	45.497	42.9946	324.611	285.742	122.766	85.971	352.086	190.877	211.245	162.275	103.329	176.206	224.06
AHDC1	199.314	58.296	19.8323	18.0186	111.675	80.9591	51.1451	62.7365	73.4138	92.3753	84.6406	51.1862	23.6758	100.611	122.869	79.1246	109.555	37.9776	146.29	48.2497	93.4842	14.7621	78.3068	54.2341	92.7731	57.0087	207.712	24.3497	85.5456	83.3225	104.547	172.854	176.217	73.3785	42.9463	128.163	100.778	161.635	77.1675	0	89.284	14.3285	117.362	21.2085	175.482	103.856	304.185	105.155	218.482
FGR	0.269205	0.409382	0	0.693022	24.8167	4.49773	27.7397	0	24.4713	0.936869	0	1.86731	0	25.6459	32.765	0.738077	0.556206	27.7183	0	0.550377	4.36745	0.545301	1.18647	0.558347	20.6162	4.38529	0	38.9595	1.0184	3.34629	0.314915	0.306107	0.188996	0.21774	0.246346	0.443652	0.752582	0.195684	21.5257	0	0	85.971	0	21.2085	0	0	0.627185	0	0.232427
IFI6	44.7795	20.2235	733.795	15.9395	21.7146	23.9879	122.228	219.578	0	61.646	60.5279	189.367	0	9.86382	0	16.0327	7.1332	28.9782	75.3176	3.05765	21.7333	4.55716	17.797	24.4556	5.15406	9.64763	51.928	87.659	10.184	38.4823	28.6874	5.39312	14.0907	12.4112	24.0598	9.66494	1.91566	3.60618	336.491	0	11.1605	14.3285	0	10.6043	32.4292	110.347	164.009	34.1045	84.3711
FAM76A	6.77857	13.1002	39.6646	6.93022	15.5105	5.99697	12.1361	5.53558	0	11.0551	20.176	11.4235	11.8379	20.714	0	17.3448	16.1701	15.299	15.9326	12.781	11.1266	13.5546	11.8647	10.7947	8.5901	2.63117	19.473	11.5661	12.2208	13.0505	20.2624	13.9118	14.5527	12.6289	10.5929	31.1081	24.6984	16.9127	14.8243	0	11.1605	14.3285	0	5.30213	13.0323	0	61.6209	25.5784	15.8051
STX12	50.6051	61.7348	59.4969	37.4232	27.9188	32.9833	98.8227	47.975	73.4138	76.0738	83.6564	60.3031	39.4596	22.6868	24.5737	50.941	32.0707	78.2951	63.7303	46.2317	64.6799	46.3506	59.3233	47.2734	53.2586	64.0252	45.437	114.444	63.1408	70.6066	63.945	66.1312	86.8749	77.0801	78.3379	290.344	121.781	78.5811	118.493	0	55.8025	42.9855	0	95.4383	26.9739	32.455	23.833	42.6306	48.5773
PPP1R8	20.0019	24.6448	0	21.4837	27.9188	26.9864	16.4705	12.9163	0	20.2364	26.5732	21.3093	19.7298	15.7821	16.3825	18.6979	23.762	14.0391	21.7262	19.3244	18.5097	46.4285	35.594	22.52	34.3604	19.2953	19.473	15.8273	21.3864	15.7275	26.5693	20.2957	24.0339	13.0644	23.3207	34.3187	31.3348	24.5444	27.3132	40.8203	0	0	0	10.6043	30.3077	32.455	23.9898	5.68408	17.8969
THEMIS2	0.452264	0.655011	0	2.77209	24.8167	2.99848	100.556	0	0	0.374748	0	0.549208	0	16.7685	24.5737	0.751745	1.09521	83.8747	2.89683	3.54687	1.45582	6.89416	5.93233	1.19114	12.0261	0.877058	6.49101	95.5726	0	2.67703	0.496099	0.334301	0.262494	17.8547	1.31384	1.29279	0.273666	0.251594	7.61521	0	55.8025	14.3285	0	26.5106	0.909231	0	0.313593	0	0.697282
RPA2	14.9839	26.4461	19.8323	27.7209	31.0209	34.4826	30.3403	14.7615	24.4713	12.3667	30.0179	17.2451	11.8379	28.6051	16.3825	15.1032	19.5245	30.2381	14.4842	18.1624	14.0382	70.1101	40.3399	21.4405	46.3865	32.4511	0	31.0459	21.3864	16.3968	29.0757	20.4729	19.2565	20.6853	26.1947	26.2518	25.3141	20.6586	15.7381	0	11.1605	0	0	21.2085	31.52	12.982	22.5787	11.3682	19.2915
SMPDL3B	0.107682	0	0	0.693022	0	7.49621	0	0	0	0	0	0.109842	0	3.94553	0	0.382706	8.45777	2.33985	1.44842	6.66568	0.831895	1.4801	7.1188	0.521124	1.71802	0.877058	6.49101	0	0	1.33851	0.25452	1.19623	2.33094	0.21774	0.328461	1.46453	0.410499	0.587052	2.84301	0	0	0	0	0	0.606154	0	0	0	0.232427
XKR8	2.98817	3.19318	0	0.693022	3.10209	5.99697	4.33433	5.53558	24.4713	5.24647	4.42887	7.46924	0	1.97276	8.19124	4.55147	4.06546	3.05981	11.5873	3.85264	3.11961	2.1033	5.93233	7.14684	1.71802	7.89352	0	3.04371	3.0552	4.35017	5.45277	2.35219	2.51994	1.30644	1.88865	6.57846	4.85757	2.12457	7.91982	0	11.1605	28.657	0	0	6.66769	12.982	5.64467	0	7.6701
EYA3	62.7731	48.0614	59.4969	61.6789	77.5523	46.4765	92.7547	36.9038	48.9425	65.9556	73.3224	56.7882	90.7571	51.2919	16.3825	63.3926	88.9929	63.716	34.762	156.124	61.0403	172.276	104.409	69.905	137.442	99.1075	97.3651	122.966	98.7848	85.6649	82.5465	97.048	102.026	111.701	78.2558	210.573	142.58	99.2957	53.9157	40.8203	33.4815	100.3	0	63.6256	68.1923	77.8921	58.7986	73.893	52.9934
PTAFR	0.834534	0.573135	0	9.70231	0	40.4795	171.639	0	0	1.68636	2.46048	1.09842	11.8379	3.94553	32.765	3.40335	3.09067	129.772	5.79366	3.66918	3.74353	9.54277	23.7293	2.71729	1.71802	35.9594	0	102.878	14.2576	5.35406	1.16475	1.85275	2.39394	357.094	1.88865	14.5356	3.76291	2.65571	1.62458	0	0	0	469.448	132.553	0.303077	6.49101	1.56796	17.0522	0.697282
DNAJC8	45.8994	58.4597	198.323	50.5906	37.2251	56.9712	36.4084	70.1173	24.4713	35.7884	43.3045	43.9367	71.0273	87.788	131.06	43.5465	50.8498	49.1369	63.0061	35.958	45.0263	51.8036	34.4075	37.9304	72.1568	27.1888	32.455	29.8284	33.6072	32.7936	43.221	39.367	45.6844	32.2256	37.1982	48.3056	50.6282	42.715	70.0599	0	78.1235	28.657	0	10.6043	66.6769	19.473	60.053	25.5784	36.9559
AL353354.2	0.689164	0.245629	0	1.38604	3.10209	0	0	0	0	0.374748	0	0.549208	0	1.97276	0	0.28703	0.275236	0	0	0.122306	0	0.1558	0	0.446677	0	0.877058	0	0	0	0	0.500413	0.523604	0.472489	0.21774	0.492691	0.534291	0.410499	0.615007	1.21843	0	0	0	0	0	0.909231	0	0.940778	0	0.697282
ATPIF1	64.6306	60.7523	39.6646	117.121	52.7356	46.4765	50.2782	42.4394	97.885	42.7212	69.8777	44.376	142.055	68.0604	32.765	25.1083	44.6341	27.3583	28.2441	48.8613	33.1718	85.5733	24.9158	77.573	24.0523	32.4511	32.455	27.3934	26.4784	19.4085	15.7846	23.3447	25.9764	11.758	26.9338	33.5649	41.5288	21.4134	47.1128	285.742	44.642	57.314	0	15.9064	22.7308	38.946	49.8612	25.5784	24.6373
SESN2	6.18094	3.52068	19.8323	0	6.20418	8.99545	12.1361	3.69038	0	6.93283	5.90516	4.39367	3.94596	33.537	49.1475	16.2514	16.5084	49.1369	21.002	11.191	12.6864	1.67485	10.6782	28.029	1.71802	4.38529	0	15.8273	7.1288	10.3735	6.94969	4.8816	7.76982	13.2822	15.6019	6.85992	10.3993	5.08779	7.81828	0	0	0	0	5.30213	1.21231	0	1.56796	14.2102	9.52952
MED18	3.5858	3.93007	0	4.15813	0	4.49773	1.73373	11.0712	0	4.49697	3.93677	2.52636	7.89192	3.94553	0	4.10043	4.72488	6.47959	7.96628	5.32031	3.43157	3.23286	2.37293	5.06234	3.43604	2.63117	0	5.47868	1.0184	2.00777	2.40716	2.07831	2.49894	2.39514	2.135	2.61898	2.87349	1.84502	4.36605	0	0	0	0	5.30213	5.15231	0	7.52622	2.84204	4.18369
PHACTR4	90.7704	155.974	138.826	74.8464	114.777	128.935	162.971	166.067	97.885	162.266	109.245	166.85	35.5136	127.243	237.546	179.626	237.099	147.411	144.117	176.426	227.003	144.933	255.09	308.468	269.729	167.518	220.694	222.191	187.386	242.94	249.197	305.011	327.466	196.619	289.292	247.477	279.139	337.192	179.313	40.8203	189.729	57.314	0	148.46	153.357	214.203	100.35	150.628	106.917
RCC1	17.6544	14.574	19.8323	29.7999	15.5105	38.9803	16.4705	16.6067	73.4138	17.4258	8.36564	12.3023	27.6217	29.5915	16.3825	16.0737	21.4741	20.5187	21.002	19.1409	23.813	77.5885	64.0692	21.9244	63.5667	29.82	32.455	31.6546	27.4968	23.0894	16.3842	12.3168	14.6577	20.4676	15.1092	24.711	27.7771	12.384	15.2304	0	11.1605	28.657	117.362	5.30213	33.6415	0	16.4636	17.0522	15.8051
TRNAU1AP	19.4796	31.9318	79.3292	30.493	21.7146	17.9909	31.2072	16.6067	24.4713	38.7864	31.4942	30.8655	19.7298	19.7276	8.19124	35.1953	24.754	27.8982	18.8294	23.2993	37.1233	79.614	46.2722	27.6568	58.4127	49.9923	12.982	46.8732	46.8464	55.883	38.411	44.4862	43.742	39.411	34.1599	96.5397	83.2629	49.0328	18.4796	0	33.4815	14.3285	0	31.8128	23.3369	12.982	26.0282	42.6306	26.4967
TAF12	14.5424	13.1821	19.8323	15.2465	9.30628	13.4932	15.6036	11.0712	0	14.4278	9.84193	12.7416	27.6217	20.714	49.1475	20.2288	15.0577	17.0989	22.4504	14.799	16.118	37.2363	29.6617	25.0884	39.5145	24.5576	12.982	32.2634	19.3496	19.0738	18.7396	18.9061	22.0285	21.5563	16.9157	27.4063	35.9871	21.4414	13.0982	0	11.1605	0	0	26.5106	21.5185	19.473	25.0874	8.52612	17.8969
RAB42	0.0699932	0.0818764	0	0	0	1.49924	4.33433	0	0	0.936869	0	0.549208	0	0	0	1.77685	0.338311	1.97988	6.51787	0.183459	0.519935	0.0389501	0	0.297785	1.71802	0	0	1.21749	0	0.334629	0.60826	0.358467	0.157496	6.09673	0	0.443652	0.684165	1.00638	1.21843	0	11.1605	0	0	0	5.75846	0	1.41117	0	4.18369
GMEB1	25.4075	36.1075	59.4969	22.8697	43.4293	25.4871	36.4084	25.8327	97.885	30.1672	27.5574	28.449	51.2975	46.36	8.19124	38.1203	38.3037	37.0777	32.5893	36.5695	37.2273	80.4319	41.5263	30.1135	75.5929	46.484	19.473	40.177	60.0856	47.8519	42.1468	57.4917	57.5701	36.1449	34.0778	55.4709	49.8072	63.6253	38.7868	0	11.1605	28.657	234.724	26.5106	33.3385	25.964	22.4219	36.9465	25.567
YTHDF2	51.7303	47.7339	79.3292	38.8092	43.4293	61.4689	50.2782	40.5942	24.4713	46.4687	42.3203	53.1634	19.7298	40.4417	139.251	40.3892	69.7666	30.2381	34.762	64.0272	41.2828	87.0145	73.5609	49.0601	44.6685	37.7135	45.437	57.2218	38.6992	76.63	46.8188	50.8701	53.8952	32.2256	51.9789	58.1328	54.1859	53.1981	46.0974	0	66.963	28.657	0	26.5106	46.6739	25.964	46.4117	39.7885	29.5183
OPRD1	0.414575	2.21066	0	0	3.10209	1.49924	0	0	0	0.187374	7.38145	0.219683	0	0	0	1.13445	4.17441	1.07993	0	0.672683	0.519935	0.545301	0	2.23339	0	0.877058	0	0	2.0368	1.00389	0.595318	0.676658	0.577486	0	0.903267	1.84617	45.1549	0.363413	0.406145	0	0	0	0	0	2.72769	0	1.09757	0	0
EPB41	88.4391	109.059	39.6646	1814.33	220.249	205.396	76.2842	38.749	24.4713	24.1712	157.963	38.2249	3030.5	300.847	458.71	99.9957	153.759	93.2341	48.5219	168.354	28.2844	1665.86	391.534	133.37	503.38	365.733	129.82	216.104	71.288	277.073	47.5004	245.308	320.61	221.442	92.8723	357.064	359.597	295.008	63.1555	1224.61	66.963	272.242	469.448	84.8341	13.6385	32.455	11.7597	56.8408	22.0806
TMEM200B	1.24911	0.655011	0	11.0883	3.10209	0	1.73373	9.22596	0	14.6152	0	0.329525	15.7838	5.91829	0	15.6773	0.911719	0	27.5199	1.0396	0.623922	1.83065	4.74587	11.5764	1.71802	0.877058	6.49101	0.608743	4.0736	2.00777	0.375309	1.03915	0.808481	0.21774	0.410576	1.54086	1.02625	1.11819	6.29524	0	0	0	0	5.30213	1.21231	19.473	0.940778	28.4204	21.3833
SRSF4	145.866	111.27	237.988	165.632	111.675	155.921	129.163	110.712	122.356	137.72	113.182	162.895	311.731	155.848	196.59	172.587	168.966	121.672	137.599	159.365	197.783	426.581	167.292	172.641	250.831	276.273	149.293	160.708	190.441	294.808	133.994	120.775	132.916	131.297	133.027	187.374	242.742	133.233	108.136	0	133.926	57.314	0	106.043	105.168	142.802	78.0845	184.733	97.387
MECR	24.7022	18.2584	0	13.8604	15.5105	22.4886	13.8699	25.8327	0	21.3606	23.6206	14.2794	0	4.93191	0	24.7256	24.4157	8.27948	17.381	26.5404	14.3502	40.4691	23.7293	23.5995	17.1802	17.5412	19.473	21.306	16.2944	21.7509	29.0153	22.5633	30.4493	11.3225	29.972	43.6258	73.2741	19.7082	11.6767	40.8203	22.321	14.3285	0	0	21.2154	0	23.9898	14.2102	20.4536
PTPRU	0.796845	3.02943	0	0	0	1.49924	0.866866	12.9163	0	8.24445	12.7945	2.6362	0	0	0	1.64017	4.72488	0.359977	8.69049	21.7705	16.222	0.740051	1.18647	5.13679	0	0.877058	45.437	1.21749	0	0.669257	4.07664	1.4822	4.2314	1.0887	24.963	7.98097	101.872	3.80186	0.507681	0	0	0	0	0	16.6692	12.982	10.9757	2.84204	3.71884
MATN1	0.231516	0.573135	0	0	0	0	0	1.84519	0	0.187374	0.492097	0.549208	0	0	0	0.984102	0.693824	0.359977	1.44842	0.672683	0	0.311601	0	0.260562	0	0	0	0	3.0552	0	0.181184	0.277913	0.272994	0	2.62769	0.539062	1.09466	0.363413	0.101536	0	0	0	0	0	0.606154	0	1.09757	0	1.85942
LAPTM5	4.2965	1.88316	0	44.3534	192.33	382.307	370.152	5.53558	0	5.43384	3.44468	48.0008	0	353.125	221.164	0.710741	0.71676	359.797	4.34525	0.856142	30.6761	24.928	73.5609	8.78466	238.805	189.444	0	315.937	10.184	26.101	0.565121	0.620269	0.587986	556.326	0.410576	0.720339	0.684165	0.559097	8.52904	0	334.815	358.213	234.724	164.366	0.909231	0	4.3903	2.84204	2.5567
SDC3	97.802	87.1164	19.8323	12.4744	21.7146	13.4932	168.172	212.197	24.4713	60.7091	36.4151	41.3005	0	0	24.5737	30.7669	23.9627	19.7988	107.183	20.3028	39.2031	4.20661	11.8647	23.525	1.71802	2.63117	45.437	460.209	81.472	23.7586	319.639	95.2436	193.059	31.5723	476.35	255.51	335.583	105.334	282.474	0	100.445	0	117.362	10.6043	48.4923	168.766	40.2966	17.0522	88.7872
PUM1	269.888	230.4	237.988	212.065	152.003	164.917	201.113	188.21	244.713	243.211	279.019	190.136	165.73	265.337	368.606	280.442	356.734	183.768	252.024	327.291	270.99	342.722	327.465	253.489	347.04	255.224	194.73	269.673	282.097	264.357	336.247	307.73	356.309	219.482	252.176	288.756	263.883	358.297	233.533	285.742	156.247	286.57	234.724	174.97	237.612	220.694	192.546	230.205	224.292
NKAIN1	52.3064	80.5663	19.8323	1.38604	3.10209	5.99697	5.2012	1.84519	24.4713	5.24647	37.8914	4.06414	0	0	0	2.51493	31.1246	0.899943	6.51787	2.14036	0.831895	1.9475	2.37293	3.61064	1.71802	3.50823	0	7.91366	2.0368	1.00389	11.3197	220.079	246.072	6.53221	52.9643	221.683	275.582	214.861	26.2979	0	0	0	0	0	2.42462	0	5.80146	0	2.32427
SNRNP40	23.3023	37.0081	19.8323	36.0371	58.9398	38.9803	26.8728	22.1423	48.9425	26.045	63.9725	28.3392	47.3515	25.6459	16.3825	25.696	31.9274	19.7988	21.7262	22.4432	26.7246	96.2846	56.9504	22.6689	51.5406	62.2711	38.946	28.6109	30.552	21.4162	31.7633	30.1515	32.5807	22.8627	28.8224	46.2973	40.6394	25.4669	40.2083	0	11.1605	57.314	0	21.2085	41.5215	6.49101	24.7738	42.6306	27.194
ZCCHC17	30.6247	48.3071	0	23.5627	24.8167	47.9757	34.6746	33.2135	48.9425	31.4788	65.4488	25.4833	15.7838	31.5642	57.3387	27.6642	30.9354	22.4986	26.0715	34.0011	25.7888	49.4666	29.6617	27.5823	27.4883	70.1646	45.437	40.177	24.4416	24.0933	35.8356	55.055	52.3938	29.1772	78.0916	86.1067	66.2956	51.5767	54.9311	40.8203	33.4815	14.3285	0	31.8128	24.2462	12.982	34.9656	34.1045	29.0534
FABP3	17.9882	14.1646	0	2.07907	3.10209	7.49621	12.1361	7.38077	24.4713	11.0551	4.42887	5.71177	0	0	0	0.328034	2.13308	4.31973	18.1052	1.22306	0.311961	2.14225	2.37293	9.60357	3.43604	6.1394	38.946	32.8721	3.0552	1.00389	1.38908	2.59385	1.76396	8.27413	1.39596	6.41149	4.99441	1.23001	1.42151	0	0	0	0	0	4.24308	0	89.0603	0	21.6157
SERINC2	4.88875	9.57953	138.826	0	3.10209	1.49924	1.73373	20.2971	0	3.5601	2.95258	5.16256	0	1.97276	0	19.4634	16.3651	0.179989	10.8631	66.2287	1.03987	1.51905	1.18647	32.7191	10.3081	1.75412	0	1.82623	0	4.01554	11.0479	20.195	5.17638	1.95966	19.4613	29.3812	14.0254	5.42324	19.7996	0	11.1605	0	0	10.6043	82.4369	12.982	57.701	0	21.1509
TINAGL1	20.9172	7.53263	416.478	5.54417	6.20418	5.99697	11.2693	25.8327	0	106.803	8.85774	170.694	7.89192	0	49.1475	7.79081	1.42205	0.359977	4.34525	28.8031	37.3313	1.2464	7.1188	4.31788	3.43604	0.877058	0	1.21749	10.184	82.6533	0.163928	0.257774	0.230995	0.435481	0.574806	0.267146	0.752582	0.111819	4.97527	0	44.642	0	0	0	2.12154	64.9101	4.3903	255.784	1.39456
HCRTR1	0.839918	0.982516	0	0	0	1.49924	0.866866	1.84519	0	0.187374	0	0.65905	0	0	0	0.738077	0.321109	0	2.17262	0.366918	0.103987	0.350551	0	0.483901	1.71802	0	0	0	0	0.669257	0.517668	0.84985	1.00798	0.21774	0.492691	3.5683	5.88382	0.97842	0.812289	0	0	0	0	0	0.606154	0	0.940778	0	0.464855
PEF1	27.3296	30.458	59.4969	18.7116	12.4084	26.9864	13.003	35.0586	48.9425	23.9838	32.4784	23.0668	31.5677	24.6596	0	9.00727	10.4418	8.27948	26.7957	13.2091	10.2947	9.46487	8.30527	17.6065	8.5901	11.4017	12.982	9.13114	1.0184	6.35794	12.7821	8.56697	9.63877	5.87899	10.7571	13.1999	14.3675	8.94556	29.2424	0	11.1605	0	0	15.9064	18.7908	32.455	20.6971	17.0522	13.7132
COL16A1	1.3891	5.73135	0	0	0	4.49773	1.73373	92.2596	0	116.359	11.3182	1.64763	3.94596	1.97276	0	53.7293	0.905985	0.719955	187.57	1.9569	2.28771	1.0127	2.37293	2.68006	0	1.75412	51.928	0	21.3864	2.00777	6.27241	1.49026	0.566987	0.435481	9.27902	0.72988	1.36833	3.4664	1.31997	0	0	0	0	0	7.88	149.293	32.3	22.7363	300.296
BAI2	1.75521	48.2252	0	0.693022	0	0	2.6006	9.22596	0	14.8025	35.4309	0.109842	0	0	0	6.57435	4.54139	0.179989	39.1072	3.79149	0.519935	0.584251	0	1.82393	1.71802	0	12.982	1.82623	3.0552	0	68.2373	22.1041	22.1965	3.70158	49.187	35.7069	47.0706	21.6091	7.81828	0	0	0	0	5.30213	25.1554	0	8.3102	5.68408	19.059
SPOCD1	0.457648	0.327505	0	0	3.10209	0	0	0	0	1.31162	0.984193	0	0	0	0	0.259694	0.401386	0.359977	0.724208	1.9569	0.311961	0.11685	1.18647	0.967801	0	2.63117	0	0	1.0184	0.334629	0.444332	0.322218	0.44099	1.30644	0.574806	1.11629	0.820998	0.279549	0.507681	0	0	0	0	0	0	0	0	0	0.464855
PTP4A2	93.6509	143.038	79.3292	135.139	120.982	202.398	123.962	110.712	146.828	109.239	93.0062	74.253	236.758	208.127	188.399	79.7806	71.9168	142.731	202.778	165.358	73.9347	125.38	78.3068	91.3455	125.415	110.509	168.766	128.445	71.288	40.4901	69.8507	46.8787	50.9448	62.7092	64.2962	81.4174	101.667	49.536	91.1795	40.8203	167.408	114.628	469.448	159.064	131.232	97.3651	215.438	79.5771	116.446
AL136115.1	0.199211	0.0818764	0	0	0	0	0	0	0	0.562121	0	0	0	0	0	0.232357	0.12615	0	0	0.122306	0.103987	0.584251	0	0.186116	0	0	0	0.608743	0	0.334629	0.220009	0.14097	0.220495	0.435481	0.328461	0.353014	0.410499	0.251594	0	0	0	0	0	0	0	0	0	0	0
KHDRBS1	127.872	335.529	138.826	122.665	173.717	133.433	137.832	221.423	73.4138	192.246	164.36	151.472	63.1354	147.957	65.5299	258.792	296.991	107.453	212.917	164.502	180.417	119.849	163.732	112.004	164.93	99.9846	162.275	115.661	201.643	176.015	217.084	291.929	259.302	129.773	186.402	290.287	213.323	300.71	207.438	163.281	156.247	171.942	234.724	100.74	284.589	214.203	243.975	252.941	158.98
TMEM39B	14.3809	23.2529	0	6.2372	24.8167	31.4841	6.93493	12.9163	0	15.552	14.7629	16.6959	15.7838	10.8502	8.19124	19.2037	17.5119	16.9189	15.9326	13.3925	24.5409	19.5529	18.9835	14.182	32.6424	37.7135	12.982	10.9574	30.552	25.0972	23.981	40.092	41.789	12.8467	28.2476	72.1818	78.2001	37.4875	18.175	0	33.4815	0	0	21.2085	21.8215	6.49101	11.4461	14.2102	22.5454
KPNA6	99.3365	101.69	218.155	163.553	80.6544	95.9515	91.8878	79.3432	122.356	82.4445	102.848	83.6994	236.758	89.7608	221.164	94.7745	98.0184	89.8143	89.0775	91.6072	79.654	172.744	107.968	106.644	142.596	92.091	90.8741	108.965	115.079	96.7077	108.822	106.626	109.859	81.4349	114.058	131.96	135.738	108.689	117.274	122.461	100.445	85.971	117.362	74.2298	100.925	84.3831	108.346	96.6293	85.0684
TXLNA	27.2166	36.1075	19.8323	21.4837	43.4293	31.4841	23.4054	31.3683	0	25.4828	32.9705	22.8471	23.6758	22.6868	16.3825	29.072	21.5544	16.7389	48.5219	14.4321	20.0695	24.8891	26.1023	39.4565	18.8982	23.6806	32.455	13.3923	21.3864	18.0699	17.2685	15.688	14.9096	10.4515	15.7661	18.6382	18.883	12.0485	30.6639	40.8203	44.642	71.6425	117.362	15.9064	32.4292	25.964	19.2859	19.8943	41.6045
CCDC28B	7.01547	17.9309	0	3.46511	9.30628	19.4901	0.866866	5.53558	48.9425	5.43384	13.2866	4.28383	15.7838	12.823	32.765	7.33976	3.93358	2.15986	13.7599	4.46417	5.92725	5.92041	7.1188	5.62069	3.43604	7.89352	0	2.43497	8.1472	2.3424	8.11445	8.14808	8.96679	1.30644	11.4961	9.6888	15.9411	6.82099	10.0521	40.8203	0	0	0	0	4.24308	12.982	29.1641	14.2102	9.29709
IQCC	0.769925	1.96503	0	3.46511	3.10209	4.49773	0	0	0	1.87374	0.984193	0.878734	7.89192	0	0	1.47615	2.73516	0.539966	1.44842	2.32381	0.831895	3.38866	1.18647	1.00502	3.43604	0	0	0.608743	0	0.334629	1.79458	1.03512	1.35447	1.0887	1.72442	2.11808	1.57358	1.25797	1.92919	0	0	0	0	0	3.03077	6.49101	0.627185	2.84204	1.62699
DCDC2B	0.603018	0.573135	0	0	0	0	0.866866	0	0	0.936869	0.984193	0.65905	0	0	8.19124	0.656068	0.814239	0.719955	0	1.28421	0.415948	0.740051	0	0.930578	0	0	0	1.21749	0	3.01166	1.20789	1.01499	0.976477	0.653221	0.821152	1.95589	1.91566	1.11819	0.304608	0	0	0	0	0	0	0	0.156796	0	0.697282
TMEM234	7.26314	3.60256	0	5.54417	3.10209	0	4.33433	1.84519	24.4713	5.43384	8.85774	5.38224	0	7.89106	16.3825	5.54924	4.33497	2.87982	5.06945	8.13335	6.96712	6.38781	2.37293	8.48687	6.87208	4.38529	6.49101	10.3486	4.0736	8.70035	7.68737	4.27341	4.75639	4.13707	4.59845	8.95892	5.61016	5.00392	6.39678	0	0	0	0	5.30213	4.54615	0	3.91991	2.84204	6.04311
EIF3I	68.1734	82.8589	39.6646	69.9952	83.7565	71.9636	56.3463	75.6529	97.885	54.7132	49.7017	45.9138	43.4056	70.0332	32.765	40.1568	37.8048	42.1173	71.6966	44.3359	37.7473	33.0297	27.2887	86.4321	20.6162	29.82	51.928	24.9585	19.3496	21.7509	37.7768	31.7183	32.3917	20.0321	29.6436	35.5781	30.7874	29.8837	98.0839	40.8203	44.642	28.657	0	5.30213	96.0754	64.9101	125.594	71.051	48.3449
FAM167B	1.35141	2.29254	0	0.693022	0	1.49924	0	1.84519	0	2.43586	0.984193	35.9182	0	0	0	0.314366	1.23856	0.179989	2.17262	1.65113	38.5791	0.662151	0	2.82896	0	0.877058	12.982	1.21749	1.0184	10.3735	0.634143	0.402772	0.608986	0.435481	0.985382	4.14553	2.39458	0.475233	2.03072	0	0	0	0	0	1.21231	0	1.56796	2.84204	0.464855
LCK	0.61917	0.409382	0	0.693022	108.573	0	0	0	0	0.562121	0.984193	2.96573	0	144.012	0	0.92943	1.14108	0.719955	0.724208	7.0326	4.36745	0.817952	7.1188	1.26559	101.363	0.877058	0	0.608743	0	5.01943	0.582377	0.588048	0.724483	0.653221	0.903267	1.12106	1.77883	0.92251	0.609217	0	22.321	157.614	0	0	0	0	0.313593	0	0.232427
HDAC1	47.6492	19.896	19.8323	56.1348	58.9398	79.4598	36.4084	22.1423	48.9425	29.7924	31.9863	62.2802	82.8652	75.9514	32.765	31.9697	38.8885	22.6786	2.17262	55.7104	60.1044	84.7164	67.6286	64.1727	70.4388	59.6399	25.964	41.3945	50.92	98.0462	20.711	3.90286	2.84543	27.653	25.2915	5.54327	7.32057	2.15252	35.8423	81.6407	78.1235	42.9855	117.362	21.2085	20.9123	19.473	22.8923	19.8943	2.78913
MARCKSL1	50.4543	467.76	39.6646	27.7209	71.3481	37.481	43.3433	232.494	0	88.6278	59.5437	242.421	0	55.2374	98.2949	143.98	242.494	17.0989	167.292	162.728	247.073	15.1516	36.7805	85.0176	60.1307	24.5576	71.4011	31.6546	75.3616	50.5289	208.15	261.21	363.428	36.3626	278.781	261.86	301.649	331.796	354.361	81.6407	312.494	14.3285	117.362	37.1149	162.752	253.149	168.87	105.155	47.1827
TSSK3	4.02192	0.491258	0	1.38604	0	0	1.73373	1.84519	24.4713	2.62323	1.96839	0.988575	0	0	0	1.12078	1.33031	2.87982	0.724208	1.9569	0.831895	1.75275	2.37293	3.98287	1.71802	0	6.49101	1.21749	7.1288	3.01166	1.44516	0.845822	1.03948	1.74192	0.739037	1.99405	1.57358	0.950465	0.406145	0	0	0	0	5.30213	2.12154	0	1.72476	2.84204	3.02156
FAM229A	5.48639	6.38636	0	9.70231	0	1.49924	0.866866	14.7615	0	4.12222	4.42887	3.51493	67.0813	1.97276	0	3.84073	4.39804	1.79989	7.24208	2.20151	3.53556	15.5411	9.49173	8.15186	3.43604	6.1394	6.49101	4.2612	10.184	6.69257	1.88949	2.41261	2.75094	0.435481	2.05288	3.97856	4.44707	2.46003	0.913825	0	0	0	0	0	2.42462	6.49101	6.11505	2.84204	3.25398
BSDC1	67.3711	54.5297	19.8323	179.493	31.0209	32.9833	40.7427	44.2846	97.885	50.4036	39.3677	34.2706	260.433	14.7957	57.3387	42.3301	51.6641	22.4986	32.5893	41.5841	37.8512	152.061	35.594	70.1284	41.2325	42.0988	71.4011	50.5256	41.7544	57.2215	36.9744	45.763	50.0523	30.7014	32.0249	62.388	69.1691	50.5424	30.867	0	44.642	28.657	0	31.8128	35.46	77.8921	28.3801	51.1567	32.075
RP1-27O5.3	11.9096	36.5169	0	4.15813	0	2.99848	12.1361	16.6067	24.4713	31.8535	24.6048	58.8751	0	3.94553	8.19124	43.0408	57.5874	12.2392	38.383	43.8467	49.7057	6.69941	72.3745	9.56634	10.3081	13.1559	25.964	15.8273	32.5888	64.918	64.9199	77.002	78.2547	17.4192	61.6685	81.3983	106.388	103.405	19.2919	0	0	0	0	15.9064	23.64	19.473	17.0908	25.5784	21.3833
ZBTB8B	2.49283	13.1002	0	1.38604	0	0	0	7.38077	0	2.24849	6.39725	0.768892	0	0	0	2.15956	7.9589	1.25992	3.62104	10.396	1.87176	0.428451	1.18647	2.01005	0	0.877058	12.982	0	3.0552	0.669257	26.8023	30.369	47.6164	1.74192	35.638	53.6438	87.5732	46.2933	3.75684	0	0	0	0	0	0.606154	12.982	1.56796	0	0.697282
ZBTB8A	5.4487	30.5399	0	1.38604	0	4.49773	1.73373	23.9875	0	20.4237	10.8261	33.7214	0	0	8.19124	28.744	27.4376	2.51984	46.3493	13.2091	32.2359	1.36325	13.0511	2.68006	1.71802	3.50823	25.964	4.86994	5.092	12.7159	21.3279	29.9743	24.9264	4.35481	15.6019	29.0712	32.361	34.664	29.8516	0	11.1605	0	0	0	16.6692	51.928	19.4427	28.4204	25.3346
ZBTB8OS	65.029	41.9207	79.3292	43.6604	31.0209	47.9757	39.009	23.9875	97.885	45.3445	63.9725	33.9411	43.4056	48.3327	65.5299	52.1574	57.0828	30.7781	53.5914	45.3755	42.5307	108.398	68.8151	85.0548	92.7731	69.2875	64.9101	59.048	70.2696	59.5639	61.87	71.7901	87.4839	50.5157	70.6191	126.083	137.038	68.6851	29.7501	0	33.4815	57.314	0	47.7192	35.1569	25.964	30.2617	36.9465	42.5342
RBBP4	99.105	124.943	19.8323	96.33	105.471	109.445	52.8788	103.331	97.885	83.3813	81.688	71.8365	94.703	133.162	122.869	99.121	144.034	65.3359	93.4228	94.9706	82.9816	184.935	123.393	83.9754	142.596	132.436	77.8921	75.4841	77.3984	74.2876	131.967	149.219	169.036	61.8382	121.202	178.53	133.617	171.112	90.1641	40.8203	55.8025	57.314	0	42.417	111.835	77.8921	78.5549	93.7873	69.0309
SYNC	14.9085	22.9254	19.8323	10.3953	6.20418	14.9924	2.6006	3.69038	73.4138	16.1141	13.7787	16.1467	0	18.7413	0	14.3925	17.1449	15.479	28.9683	12.1695	11.8545	9.62067	10.6782	8.5241	12.0261	7.01646	19.473	2.43497	8.1472	9.03497	25.6763	21.206	20.2015	6.53221	22.4174	25.5363	26.7509	23.2864	30.2578	0	33.4815	0	0	0	29.0954	12.982	133.747	22.7363	16.5023
KIAA1522	110.331	31.113	138.826	11.0883	24.8167	8.99545	28.6066	27.6779	146.828	30.7293	14.2708	23.5061	0	0	8.19124	3.36235	25.8607	1.97988	7.24208	84.3912	12.7904	4.05081	4.74587	63.0187	3.43604	6.1394	19.473	3.04371	2.0368	7.36183	5.58219	16.8238	9.29228	2.83062	3.61307	20.1647	29.3507	13.2786	24.0641	0	55.8025	0	0	0	6.06154	6.49101	19.5995	2.84204	6.97282
YARS	93.0532	55.594	99.1615	45.0464	105.471	113.942	62.4143	35.0586	122.356	46.2813	79.2275	32.7328	51.2975	77.9242	40.9562	33.1588	41.7326	41.3974	33.3135	34.4291	41.2828	90.3252	84.2391	49.8418	91.0551	97.3534	45.437	47.4819	40.736	52.2021	34.55	40.2611	59.9326	33.9675	56.6595	55.0749	53.7754	34.1329	42.1375	0	11.1605	85.971	0	47.7192	33.3385	12.982	30.4185	56.8408	39.5126
S100PBP	43.0727	48.0614	79.3292	41.5813	102.369	26.9864	58.08	27.6779	0	45.5318	64.4646	43.717	19.7298	48.3327	81.9124	43.1502	33.8311	47.337	44.1767	36.3249	44.4024	100.725	136.444	60.1526	176.956	54.3776	38.946	74.2666	44.8096	57.2215	87.7836	56.1908	49.0758	94.717	65.7743	37.7105	60.8907	51.2133	29.7501	40.8203	55.8025	71.6425	0	79.5319	32.4292	51.928	23.2058	25.5784	55.5501
FNDC5	5.89558	77.455	0	0.693022	0	0	1.73373	7.38077	0	27.7313	26.0811	1.86731	0	0	0	78.3865	4.03679	0.539966	55.0398	1.83459	8.83889	0.779001	0	10.7203	8.5901	0	0	0.608743	16.2944	1.67314	8.9686	32.4796	33.1792	2.61288	10.8392	60.1888	41.4604	17.6395	7.61521	0	0	0	117.362	15.9064	275.194	45.437	244.132	42.6306	192.915
HPCA	0.2369	0.245629	0	0.693022	0	0	0	0	0	0.374748	5.41306	0.109842	0	0	0	0.683404	0.303906	0	0	0.428071	0	0.11685	0	0.483901	0	0	0	0	0	0	2.55814	4.12036	6.07936	1.74192	2.95615	11.9452	23.7405	5.70279	3.14762	0	0	0	0	0	0.606154	0	0	0	1.62699
TMEM54	0.296125	0.163753	0	0	0	0	0	0	0	4.68435	13.7787	0.109842	0	0	0	3.75872	1.531	0.359977	14.4842	18.4682	2.18373	0.2337	0	3.46175	0	0	0	0.608743	0	0	0.815327	0.261802	0.304493	0	1.6423	1.28325	4.10499	0.475233	0.609217	0	0	0	0	0	3.63692	0	1.25437	0	6.74039
RNF19B	9.42754	19.7322	19.8323	2.77209	3.10209	4.49773	37.2752	7.38077	0	7.30758	7.87354	11.9727	3.94596	12.823	0	7.88649	17.6667	28.9782	14.4842	11.8637	13.6223	6.89416	4.74587	14.2565	8.5901	11.4017	0	38.3508	7.1288	10.0389	10.5906	29.5796	25.1154	30.4836	10.4286	51.5114	53.3649	33.7974	9.23979	0	0	0	0	31.8128	3.63692	25.964	10.5054	2.84204	5.57826
AK2	27.2704	22.7616	99.1615	22.1767	24.8167	22.4886	20.8048	23.9875	0	17.6131	24.1127	19.2223	11.8379	26.6323	0	15.0759	22.2196	29.1582	10.8631	25.0116	21.6293	34.2761	53.391	30.2252	24.0523	30.697	25.964	18.2623	16.2944	16.0622	15.9657	16.4452	18.7001	16.9837	16.8336	24.4724	22.0301	15.1795	19.9011	40.8203	89.284	28.657	117.362	26.5106	15.76	19.473	42.9622	11.3682	20.4536
ADC	18.1928	4.33945	19.8323	0.693022	3.10209	2.99848	1.73373	7.38077	24.4713	8.24445	8.36564	3.40509	0	1.97276	0	12.3149	8.7158	0.539966	10.1389	5.25916	3.9515	0.428451	0	11.4275	1.71802	0.877058	12.982	9.13114	11.2024	6.35794	12.5491	12.7316	12.2952	110.612	5.50172	27.0246	19.2935	14.2011	11.5751	0	0	0	0	0	6.36462	6.49101	6.27185	17.0522	16.7348
TRIM62	8.44764	6.30448	59.4969	3.46511	3.10209	5.99697	10.4024	5.53558	0	28.4808	12.3024	5.05272	0	13.8094	8.19124	26.1881	13.5726	3.05981	10.8631	10.8852	7.07111	2.68756	8.30527	3.5362	30.9244	1.75412	6.49101	15.8273	11.2024	9.3696	10.1894	25.0887	21.409	8.49187	21.9248	19.7258	32.9768	8.38646	20.1042	0	0	0	0	0	11.2138	19.473	6.74224	8.52612	13.4808
ZNF362	7.57542	9.49766	0	2.07907	9.30628	11.9939	16.4705	1.84519	24.4713	21.7354	16.7313	14.4991	0	4.93191	0	34.3889	23.2402	8.27948	7.24208	15.0436	18.1977	8.53007	16.6105	22.9667	18.8982	13.1559	19.473	18.2623	28.5152	28.1088	26.2415	16.6184	27.0684	25.2579	23.4028	39.0653	41.1183	17.6116	22.9472	0	0	57.314	0	15.9064	15.76	32.455	5.80146	34.1045	16.7348
A3GALT2	0.26382	1.06439	0	0	0	0	1.73373	0	0	0.936869	1.47629	0.549208	0	1.97276	16.3825	0.738077	0.596344	0	0	0.366918	0.519935	0	1.18647	0.260562	0	0	0	0	0	0	0.642771	1.2204	1.51196	1.52418	0.903267	2.64283	2.94191	0.782736	0.304608	0	0	0	0	0	0	0	0.783981	0	0.232427
PHC2	66.0736	92.9297	39.6646	14.5535	27.9188	10.4947	130.897	110.712	0	83.9435	82.6722	125	0	39.4553	24.5737	114.689	76.1314	61.9161	73.145	41.2171	104.195	25.0059	23.7293	82.9331	24.0523	21.0494	77.8921	105.921	151.742	100.054	53.6692	96.1619	151.396	134.128	109.542	223.796	104.335	95.1024	83.8689	0	66.963	57.314	0	58.3234	95.4693	64.9101	77.4574	88.1032	47.4152
ZSCAN20	2.90202	2.45629	0	1.38604	0	4.49773	1.73373	1.84519	24.4713	2.81061	0.984193	2.41652	0	0	8.19124	2.82929	2.59754	0.539966	2.17262	1.22306	2.28771	2.99916	1.18647	1.34003	0	2.63117	0	3.65246	3.0552	3.01166	3.85231	5.41326	4.93488	3.2661	3.20249	5.34291	5.74699	5.28347	1.01536	0	0	0	0	0	2.42462	0	1.41117	2.84204	2.5567
CSMD2	4.89952	47.3245	0	2.77209	12.4084	4.49773	4.33433	12.9163	48.9425	10.6803	34.9389	6.5905	3.94596	2.95915	0	4.07309	4.3235	2.87982	10.8631	7.33836	5.61529	3.54446	3.5594	8.97077	1.71802	2.63117	0	4.2612	22.4048	8.03109	954.144	175.681	359.071	18.7257	806.782	720.84	1304.5	359.304	15.8396	81.6407	22.321	14.3285	0	0	3.63692	19.473	10.3486	19.8943	3.71884
C1orf94	0.107682	0	0	0.693022	0	0	0	1.84519	0	0.374748	0	0.219683	0	0	0	0.246026	0.286704	0	0	0.428071	0.103987	0.272651	0	0.670016	0	0	0	0	0	0.334629	4.48214	0.483327	0.86098	0	1.6423	0.93978	2.25775	0.475233	0.101536	0	0	0	0	0	0	0	0	0	0
SMIM12	24.826	28.493	39.6646	16.6325	12.4084	89.9545	13.003	9.22596	0	24.3586	17.7155	30.7557	7.89192	8.87744	49.1475	11.0985	10.5679	10.9793	13.0357	11.8637	19.0296	16.7875	17.797	17.681	6.87208	116.649	25.964	10.9574	16.2944	22.4201	21.8844	24.4805	23.7924	15.4596	18.3117	45.0903	39.5448	20.435	34.0146	40.8203	44.642	28.657	0	15.9064	18.1846	19.473	24.1466	28.4204	11.6214
GJA4	6.00864	2.70192	0	1.38604	3.10209	160.419	1.73373	3.69038	0	24.7333	2.95258	78.3171	0	0	16.3825	0.669736	0.0974794	0.179989	0	1.89574	35.3556	0.506351	1.18647	1.71226	1.71802	44.7299	0	0.608743	2.0368	39.1516	0.138045	0.120832	0.104998	0	0.410576	0.252834	0.20525	0.0838646	96.764	0	178.568	14.3285	234.724	15.9064	1.21231	0	4.54709	142.102	1.39456
DLGAP3	5.52946	21.9429	0	0	0	2.99848	9.53553	0	0	1.31162	10.8261	0.439367	0	0	0	1.23013	1.75463	26.2783	2.17262	3.85264	0	0.428451	2.37293	1.34003	5.15406	1.75412	6.49101	4.86994	3.0552	0	3.66682	36.5999	32.8012	3.48384	28.3297	158.498	85.247	18.8416	3.35069	0	0	0	0	10.6043	1.51538	0	0.627185	0	0.697282
ZMYM6	2.16979	0.655011	0	0.693022	0	1.49924	2.6006	1.84519	0	2.81061	3.93677	3.62478	0	1.97276	8.19124	1.03877	0.372715	1.25992	3.62104	2.32381	2.80765	0.19475	2.37293	1.71226	0	0	0	1.82623	2.0368	1.00389	0.383937	0.161109	0.0629985	1.30644	0.246346	0.0810978	0.136833	0.0838646	2.94455	0	0	0	0	0	3.03077	6.49101	2.03835	0	4.41612
ZMYM6.1	66.2512	24.2354	0	33.9581	43.4293	22.4886	62.4143	31.3683	48.9425	29.7924	56.099	29.5474	31.5677	22.6868	40.9562	19.9281	17.9247	36.5377	15.2084	20.6697	15.598	49.3108	79.4933	33.9475	37.7964	45.607	32.455	87.659	32.5888	39.4862	0	0	0	0	0	0	0	0	0	0	22.321	42.9855	0	42.417	19.0939	25.964	21.7947	22.7363	24.8697
ZMYM1	29.914	20.1416	19.8323	15.9395	15.5105	20.9894	28.6066	25.8327	97.885	31.4788	15.255	24.9341	3.94596	8.87744	0	26.0787	17.7126	18.7188	34.762	19.5078	23.709	25.0059	39.1534	31.193	29.2063	28.0658	25.964	22.5235	37.6808	29.4473	38.1651	25.858	23.11	31.3546	28.4119	35.9931	43.9918	26.7528	21.3226	0	11.1605	14.3285	0	15.9064	30.6108	32.455	17.0908	22.7363	29.2858
SFPQ	140.062	288.86	257.82	164.246	148.9	209.894	125.696	182.674	146.828	146.152	159.439	136.314	130.217	240.677	147.442	217.815	269.049	149.571	173.81	192.938	188.632	172.042	193.394	128.643	202.726	156.993	227.185	119.314	201.643	144.56	237.032	268.113	296.943	122.152	280.916	275.017	239.526	262.664	173.322	163.281	156.247	57.314	117.362	95.4383	245.795	259.64	123.869	207.469	159.445
ZMYM4	160.198	119.294	158.658	58.9069	71.3481	106.446	124.829	110.712	220.241	174.258	145.168	134.227	43.4056	94.6927	98.2949	180.2	176.277	107.453	123.839	136.677	149.013	112.293	232.547	163.484	206.162	187.69	162.275	157.664	229.14	212.824	214.41	221.42	234.995	194.442	243.472	294.943	258.615	231.41	102.958	0	78.1235	42.9855	0	106.043	153.054	90.8741	105.837	107.997	119.932
KIAA0319L	156.02	92.8478	158.658	74.1533	117.88	83.9575	104.891	88.5692	73.4138	113.923	166.821	108.194	67.0813	47.3464	49.1475	71.8258	80.5008	56.1565	69.5239	86.2258	75.7025	111.592	121.02	222.036	120.261	120.157	110.347	127.836	122.208	131.509	180.183	134.635	116.022	135.87	193.874	145.141	195.261	138.041	87.118	0	122.766	57.314	0	68.9277	83.6492	103.856	72.9103	76.7351	86.2305
NCDN	15.1885	26.7736	0	5.54417	9.30628	11.9939	6.93493	18.4519	0	12.554	22.6364	6.48066	0	3.94553	0	7.09374	6.3935	3.05981	13.7599	5.25916	5.61529	4.36241	8.30527	4.504	1.71802	4.38529	6.49101	1.21749	8.1472	3.01166	9.19724	22.4223	18.7526	6.31447	11.7425	40.754	53.0912	17.975	14.5197	0	33.4815	0	0	5.30213	10.6077	12.982	12.3869	11.3682	15.1078
TFAP2E	0.489952	1.22815	0	0.693022	0	1.49924	3.46746	1.84519	0	1.12424	3.93677	0.988575	0	1.97276	0	1.01144	1.5482	0.359977	2.89683	3.54687	1.76778	0.506351	10.6782	0.335008	5.15406	1.75412	0	3.04371	0	0.669257	2.87737	5.18368	5.99536	2.61288	3.44884	16.5153	31.4032	4.30505	0.507681	0	0	0	0	0	0.909231	0	1.88156	0	1.39456
PSMB2	61.4271	61.2435	138.826	47.8185	55.8377	46.4765	51.1451	57.2009	48.9425	48.1551	49.2097	47.4516	23.6758	36.4961	16.3825	24.6436	31.9732	28.9782	21.7262	27.58	30.1562	41.0534	37.9669	38.2654	22.3343	17.5412	12.982	32.2634	30.552	22.0855	32.5872	29.3218	25.7664	26.1288	29.4794	37.324	42.6235	25.2432	48.3312	0	44.642	42.9855	117.362	26.5106	49.7046	64.9101	65.0705	42.6306	35.7938
C1orf216	2.51437	13.3458	0	5.54417	3.10209	8.99545	2.6006	11.0712	0	2.43586	3.93677	1.86731	0	0.986382	0	4.68815	1.68009	0.719955	14.4842	0.550377	3.74353	5.84251	8.30527	1.34003	1.71802	5.26235	0	2.43497	1.0184	1.67314	4.26213	5.0709	3.46492	1.74192	5.17326	20.1266	29.0086	4.38891	8.63057	0	0	0	0	5.30213	2.72769	0	5.64467	2.84204	6.97282
CLSPN	5.15257	24.8904	0	57.5208	18.6126	46.4765	11.2693	20.2971	0	12.7414	3.93677	12.3023	181.514	51.2919	8.19124	17.0851	30.6773	27.7183	18.8294	15.7163	21.7333	152.879	52.2045	14.3681	70.4388	38.5905	12.982	18.871	11.2024	13.7198	24.1363	8.99391	2.17345	16.9837	18.8044	2.7287	10.2625	3.718	16.5504	81.6407	22.321	57.314	0	21.2085	37.8846	38.946	5.33107	14.2102	8.83224
AGO4	29.1925	70.0043	59.4969	10.3953	49.6335	23.9879	123.962	36.9038	48.9425	59.7722	41.3361	106.986	7.89192	37.4825	40.9562	65.3198	60.873	92.1542	42.7282	52.1024	86.1012	19.9814	84.2391	42.7321	94.4911	30.697	19.473	162.534	107.95	136.528	111.773	109.606	115.098	136.088	107.899	146.878	203.813	149.922	64.6785	0	33.4815	28.657	0	153.762	30.3077	58.4191	29.3209	71.051	38.5829
AGO1	43.0027	29.9667	19.8323	16.6325	34.123	34.4826	31.2072	49.8202	73.4138	23.9838	25.0969	20.2109	0	19.7276	24.5737	21.5819	23.0051	15.839	20.2778	20.9143	21.1093	8.84167	30.8481	31.0069	17.1802	42.0988	38.946	23.741	15.276	18.7392	32.8676	47.5594	62.0325	34.6207	30.5469	49.8083	53.9122	50.7381	30.9685	40.8203	33.4815	14.3285	0	15.9064	22.1246	38.946	18.9723	25.5784	16.2699
AGO3	137.709	138.289	138.826	65.144	124.084	155.921	159.503	177.138	195.77	214.543	249.001	139.06	11.8379	110.475	196.59	268.715	163.427	127.252	223.78	138.756	159.724	151.282	270.514	141.336	207.88	252.593	194.73	176.535	348.293	250.302	334.987	218.242	238.344	195.749	330.432	266.206	322.858	245.164	109.761	40.8203	111.605	157.614	0	169.668	134.263	233.676	83.886	164.838	238.703
TEKT2	0.0753773	0.409382	0	0	0	0	0	0	0	0	0.492097	0	0	0	0	0.123013	0.441524	0	0	0.428071	0	0	0	0	0	0	0	0	0	0	0.392565	0.120832	0.125997	0.435481	0.16423	0.176507	0.0684165	0.391368	0.101536	0	0	0	0	0	0	0	0	0	0
ADPRHL2	23.2916	13.264	19.8323	10.3953	12.4084	29.9848	16.4705	12.9163	24.4713	14.4278	16.7313	11.7531	7.89192	11.8366	16.3825	6.46501	12.7411	8.45947	24.6231	11.8637	6.23922	9.27012	7.1188	12.9536	10.3081	5.26235	6.49101	15.2186	11.2024	7.0272	20.2883	13.0216	13.9227	11.758	11.9067	23.4134	18.6777	16.102	11.2705	0	0	14.3285	0	5.30213	15.1538	0	22.2651	0	12.7835
COL8A2	0.457648	0.409382	0	1.38604	0	1.49924	3.46746	0	0	13.6783	1.96839	0.549208	0	0	0	2.09122	2.0184	8.81944	39.8314	0.917295	0.415948	0.272651	2.37293	1.22836	0	0	90.8741	1.21749	0	1.33851	0.603946	1.16804	3.61191	34.6207	0.656922	1.04473	1.36833	0.642962	0.406145	0	11.1605	0	0	5.30213	2.42462	0	4.70389	0	65.7769
TRAPPC3	23.1516	21.2879	59.4969	30.493	24.8167	23.9879	26.006	18.4519	0	17.2384	23.1285	22.188	3.94596	20.714	24.5737	12.0826	12.6436	22.4986	12.3115	13.2091	14.7661	24.5385	14.2376	24.6789	30.9244	19.2953	45.437	19.4798	15.276	15.0583	14.1151	12.8122	16.8836	10.4515	16.423	28.0264	27.9824	10.2594	22.2364	0	0	14.3285	0	37.1149	18.7908	0	24.9306	5.68408	20.2212
MAP7D1	12.2811	115.2	19.8323	11.0883	68.246	26.9864	54.6126	47.975	48.9425	35.9758	35.923	39.543	7.89192	55.2374	8.19124	37.8059	27.4146	56.5164	47.0735	24.1554	53.6573	9.62067	34.4075	11.7997	25.7703	13.1559	19.473	50.5256	27.4968	27.7742	42.6515	57.6891	78.5381	30.4836	38.5941	85.2433	118.224	60.8018	88.1334	40.8203	44.642	57.314	0	68.9277	59.4031	51.928	211.518	39.7885	47.6476
THRAP3	101.905	94.4034	79.3292	106.032	120.982	82.4583	115.293	75.6529	48.9425	86.9415	71.8461	87.1045	213.082	134.148	106.486	105.039	114.716	107.813	118.77	106.651	100.867	130.405	138.817	124.027	152.904	99.9846	77.8921	118.705	114.061	103.066	107.705	103.347	93.4583	90.3622	87.9454	109.167	93.5938	99.1279	109.862	163.281	89.284	100.3	0	106.043	124.565	58.4191	102.388	130.734	83.209
SH3D21	3.56427	0.818764	0	0.693022	0	1.49924	2.6006	1.84519	0	7.30758	2.95258	7.13971	0	0	8.19124	10.7021	4.23749	2.15986	5.06945	4.76994	3.84752	0.506351	0	4.16899	0	5.26235	0	3.65246	5.092	3.01166	0.888664	1.47012	1.09197	2.39514	0.492691	6.02986	2.73666	0.866601	5.68602	0	0	0	0	5.30213	0.606154	0	0.783981	0	6.04311
EVA1B	29.3002	8.67889	59.4969	12.4744	9.30628	49.475	31.2072	47.975	48.9425	72.5137	20.176	189.477	0	4.93191	40.9562	78.2635	20.3273	11.6993	74.5934	16.0221	81.5257	2.1812	22.5429	14.0703	1.71802	28.9429	12.982	17.0448	44.8096	18.4046	2.16989	0.414856	0.346492	8.92735	0.492691	0.400718	0.342083	0.391368	137.074	0	78.1235	0	117.362	0	6.97077	12.982	8.3102	56.8408	100.176
RP11-268J15.5	3.72579	1.3919	0	0	0	1.49924	0	1.84519	24.4713	13.4909	2.46048	2.41652	0	0	0	15.1716	2.66061	0.359977	10.1389	1.71228	1.5598	0.467401	8.30527	1.71226	0	3.50823	6.49101	1.82623	14.2576	2.3424	1.19926	3.16176	2.99243	0.870961	1.0675	21.114	6.77324	1.50956	3.85837	0	0	0	117.362	0	0.606154	0	2.19515	11.3682	6.27554
STK40	28.9879	27.183	99.1615	20.7907	49.6335	64.4674	68.4824	33.2135	0	32.7904	38.8756	40.7513	43.4056	23.6732	163.825	28.3476	30.2243	48.237	37.6588	29.4146	37.9552	31.1211	37.9669	54.7552	30.9244	78.9352	6.49101	71.8316	25.46	54.2098	26.8152	28.6693	36.4551	44.8545	22.4996	73.2599	69.8533	30.5826	33.6085	40.8203	44.642	28.657	0	47.7192	18.1846	25.964	21.1675	34.1045	30.9128
LSM10	9.13142	9.25203	0	6.2372	0	23.9879	5.2012	9.22596	0	4.3096	6.39725	6.15113	7.89192	6.90468	0	2.99331	3.13081	7.37953	5.06945	3.42457	4.26346	3.50551	3.5594	6.4396	8.5901	3.50823	0	7.91366	3.0552	1.67314	3.72721	3.59676	5.19738	5.66125	3.61307	6.18251	7.93632	4.44482	9.84901	0	11.1605	0	0	15.9064	5.75846	0	13.6413	5.68408	8.83224
OSCP1	13.6379	6.87761	39.6646	3.46511	6.20418	1.49924	6.06806	7.38077	0	7.49495	20.176	5.05272	0	0	0	5.90461	14.3008	0.899943	10.8631	11.6802	5.19935	2.45385	3.5594	3.72231	0	1.75412	12.982	1.82623	6.1104	4.01554	24.188	8.41794	11.8332	4.57255	7.96517	18.0276	21.2091	10.5669	3.14762	0	0	0	0	0	6.06154	6.49101	5.48787	11.3682	10.9241
MRPS15	27.2543	22.9254	0	27.7209	6.20418	47.9757	19.0711	23.9875	24.4713	21.548	18.6997	17.2451	15.7838	30.5779	16.3825	15.1169	21.1014	15.299	11.5873	18.0401	15.4941	20.9162	15.4241	36.702	3.43604	17.5412	12.982	12.7836	13.2392	4.01554	7.88581	9.19932	9.04029	8.92735	6.56922	14.9411	17.7199	7.77145	22.9472	0	22.321	0	0	5.30213	25.4585	6.49101	48.2933	8.52612	15.5726
CSF3R	0.85607	1.14627	535.472	2.77209	0	0	130.897	0	0	1.87374	1.96839	2.41652	0	3.94553	49.1475	0.6424	2.20762	102.414	1.44842	1.10075	2.07974	5.68671	342.889	337.949	8.5901	3.50823	6.49101	221.582	3.0552	3.68092	0.349426	0.314162	0.314993	323.998	0.410576	0.610618	0.615749	1.50956	0.812289	0	0	42.9855	0	79.5319	0.909231	6.49101	2.19515	0	1.85942
GRIK3	1.66907	7.6145	0	1.38604	3.10209	2.99848	1.73373	481.595	24.4713	1.87374	80.2117	0.768892	0	0.986382	0	4.4968	15.5967	1.79989	3.62104	3.66918	0.935882	0.895852	0	3.5362	0	2.63117	0	4.2612	1.0184	0	16.0391	28.2384	480.322	3.2661	242.733	9.22606	897.078	55.6581	5.38142	0	11.1605	0	0	0	1.21231	240.167	3.76311	5.68408	2.09185
ZC3H12A	10.5097	1.3919	0	2.77209	3.10209	5.99697	5.2012	0	73.4138	2.81061	0.492097	1.3181	0	9.86382	0	0.177685	0.630749	2.33985	0	3.30226	0.311961	1.558	2.37293	2.9034	5.15406	1.75412	6.49101	1.21749	1.0184	1.00389	0.271776	0.0563881	0.0524988	1.0887	0.16423	0.0810978	0	0.0559097	0.710753	0	0	0	0	0	0	0	0.627185	2.84204	0.464855
MEAF6	26.592	48.3889	0	25.6418	37.2251	20.9894	19.0711	27.6779	24.4713	25.6702	38.8756	27.5703	23.6758	17.7549	0	18.9166	32.1281	15.659	26.7957	23.4216	23.3971	24.3048	27.2887	27.0612	12.0261	16.6641	19.473	18.871	12.2208	15.0583	29.382	31.5854	41.7365	18.0724	27.3444	51.4207	66.0904	38.2423	30.9685	0	22.321	0	0	26.5106	25.1554	12.982	25.8714	19.8943	26.9616
SNIP1	10.0844	13.1002	59.4969	11.0883	9.30628	7.49621	13.003	3.69038	24.4713	10.6803	9.34983	9.66607	11.8379	6.90468	16.3825	8.93893	8.99104	6.11961	11.5873	9.17295	9.87876	11.6461	13.0511	9.04522	8.5901	3.50823	12.982	6.69617	3.0552	7.0272	8.95134	7.95475	9.92227	5.66125	6.73345	10.1897	9.71515	8.3585	11.6767	0	11.1605	28.657	0	5.30213	10.0015	6.49101	10.1918	8.52612	12.7835
DNALI1	7.39236	6.38636	0	3.46511	0	1.49924	0	3.69038	0	5.24647	17.7155	1.86731	0	0	0	2.67895	10.8776	0.179989	6.51787	10.0902	2.49569	1.3243	0	8.59854	1.71802	0.877058	6.49101	0.608743	3.0552	2.00777	17.1132	4.03578	3.50692	1.52418	7.06191	7.23201	4.37866	6.93281	3.55377	0	0	0	0	0	2.42462	6.49101	10.6621	2.84204	0.929709
GNL2	17.6329	22.3522	19.8323	24.9488	27.9188	38.9803	18.2042	5.53558	24.4713	21.1732	21.6522	15.3778	15.7838	23.6732	40.9562	21.3222	22.4031	18.3588	23.8989	19.8747	20.6934	29.4073	18.9835	15.7082	20.6162	12.2788	0	21.9147	16.2944	13.7198	13.33	12.8162	12.8937	16.9837	14.6986	17.5076	16.8305	10.8465	18.175	40.8203	0	14.3285	0	10.6043	20.6092	32.455	27.2826	28.4204	16.9672
RSPO1	0.0915295	0	0	0	0	0	0	0	0	0	0.492097	0	0	3.94553	0	1.07978	14.8742	0	2.89683	2.50727	0.207974	0.0389501	0	0.223339	0	0	168.766	0	2.0368	0	0.582377	0.257774	1.02898	0.21774	0.410576	0.586766	0.342083	0.223639	0	0	0	0	0	0	0	0	0	0	0.697282
C1orf109	12.5019	14.574	39.6646	19.4046	6.20418	23.9879	12.1361	5.53558	0	13.1162	12.7945	11.2039	19.7298	2.95915	0	8.24186	8.67566	7.01956	7.96628	7.70528	6.3432	32.9128	11.8647	10.2364	6.87208	3.50823	12.982	3.65246	2.0368	5.68869	10.3836	6.64172	8.78829	5.22577	9.93594	9.32624	7.52582	6.20598	12.692	0	0	0	0	5.30213	17.5785	12.982	17.0908	11.3682	13.2484
CDCA8	4.90491	17.7672	19.8323	44.3534	15.5105	23.9879	9.53553	20.2971	24.4713	9.93081	3.93677	11.7531	74.9732	15.7821	8.19124	11.6725	14.3467	10.6193	13.0357	7.33836	7.69503	96.0509	34.4075	9.8269	30.9244	20.1723	6.49101	10.9574	9.1656	8.03109	14.9045	7.61642	1.63796	10.887	14.4523	2.18487	3.07874	2.09661	4.87374	81.6407	22.321	0	0	10.6043	26.9739	12.982	2.19515	11.3682	11.1565
EPHA10	0.436111	7.69638	0	0	0	0	0	0	0	0.187374	2.95258	0.329525	0	0	0	0.464715	0.424322	0	0	0.856142	0.623922	0.623201	0	0.632793	0	0	0	0.608743	1.0184	0.669257	0.953372	6.52088	14.4267	1.0887	2.54557	23.9572	83.6734	8.77783	0.304608	0	0	0	0	0	0.606154	0	0.627185	0	0.232427
MANEAL	3.89808	53.0559	0	0	0	4.49773	1.73373	7.38077	0	2.99798	46.7492	0.878734	0	0	0	0.792749	1.11815	0	0.724208	1.89574	1.24784	0.662151	0	2.94063	0	0	0	0	0	0	15.9571	30.0347	33.5572	3.04836	29.972	58.5287	58.4277	26.2776	4.36605	0	11.1605	0	0	0	3.03077	19.473	2.35194	0	5.1134
YRDC	12.2057	9.90704	39.6646	4.15813	6.20418	16.4917	2.6006	9.22596	0	5.80859	11.8103	9.00702	23.6758	9.86382	8.19124	4.51047	6.03225	6.2996	5.79366	5.993	7.79902	7.04996	4.74587	4.76456	3.43604	3.50823	12.982	7.91366	2.0368	4.01554	3.55034	5.66298	6.15285	3.91932	5.25537	6.7979	6.36274	4.36096	11.4736	0	0	0	0	5.30213	6.97077	6.49101	6.89904	5.68408	4.64855
C1orf122	44.8656	38.3181	19.8323	13.8604	24.8167	17.9909	26.006	35.0586	24.4713	33.3525	28.0495	17.7944	3.94596	8.87744	0	15.3219	9.6906	10.6193	23.1746	13.2091	8.00699	5.56986	2.37293	14.6659	5.15406	7.01646	64.9101	4.86994	7.1288	5.68869	15.7544	18.3825	16.4741	6.53221	17.08	20.1838	24.2879	15.487	37.5684	0	11.1605	0	117.362	10.6043	33.6415	19.473	68.9904	17.0522	29.7507
MTF1	19.5496	17.2759	0	27.0278	12.4084	23.9879	30.3403	20.2971	48.9425	19.4869	24.1127	18.4534	11.8379	27.6187	0	15.2809	15.6311	17.9989	21.7262	15.4106	21.0054	35.0161	24.9158	16.1921	17.1802	13.1559	25.964	28.6109	14.2576	13.0505	27.527	19.3975	20.9995	14.5886	20.0361	28.5559	30.1717	19.6802	19.4949	0	0	14.3285	0	31.8128	18.4877	32.455	21.1675	34.1045	13.2484
AL929472.1	1.36217	0.409382	19.8323	1.38604	3.10209	0	1.73373	0	0	1.49899	0	1.53778	0	0	0	0.492051	0.447258	0	0	0.61153	1.03987	2.88231	1.18647	0.744462	0	1.75412	0	4.2612	2.0368	1.33851	1.82909	1.41373	1.60646	1.52418	1.0675	2.40431	3.01033	0.97842	0.812289	0	0	0	0	0	1.21231	0	0.940778	0	0.929709
INPP5B	48.7906	14.2465	0	65.8371	62.0418	97.4507	38.1421	16.6067	0	42.1591	52.1622	25.9226	90.7571	28.6051	57.3387	38.503	23.8251	40.6774	43.4525	23.0547	32.5479	134.3	75.9339	50.8468	101.363	222.773	32.455	88.2677	66.196	53.8752	32.4492	36.1528	28.4858	57.2657	40.5649	51.3158	62.1222	27.5635	24.0641	40.8203	33.4815	57.314	117.362	42.417	16.3662	19.473	10.8189	42.6306	34.1668
SF3A3	26.382	51.0908	39.6646	45.7394	31.0209	50.9742	32.9409	36.9038	48.9425	35.9758	35.4309	31.8541	71.0273	38.4689	131.06	46.7175	44.3933	37.0777	52.1429	31.6161	44.5064	45.8442	43.8993	41.3177	17.1802	24.5576	38.946	35.9158	29.5336	29.1127	41.9268	44.5909	39.5841	21.1208	30.629	42.0754	47.0706	38.9411	59.1956	0	78.1235	14.3285	0	31.8128	45.4615	45.437	45.1573	39.7885	38.5829
FHL3	2.19132	2.7838	0	6.93022	12.4084	29.9848	8.66866	7.38077	0	15.3647	0.492097	8.12829	0	20.714	24.5737	29.4411	5.6022	14.7591	34.0378	10.5183	18.0937	1.7917	9.49173	3.72231	8.5901	9.64763	0	2.43497	16.2944	8.03109	0.983569	1.62317	2.15245	5.00803	0.574806	6.35902	9.78356	1.70525	68.0292	0	0	0	0	15.9064	42.4308	6.49101	170.751	39.7885	29.0534
UTP11L	13.3149	19.9778	0	15.9395	24.8167	22.4886	13.003	16.6067	24.4713	16.1141	10.8261	15.4877	7.89192	9.86382	8.19124	12.1509	10.1493	10.0794	14.4842	8.56142	14.3502	7.47841	9.49173	8.56132	15.4622	7.01646	19.473	6.69617	13.2392	5.68869	9.11959	10.1297	10.2688	6.09673	10.3465	12.2314	13.4096	9.72829	27.2117	0	0	0	117.362	0	26.6708	19.473	106.308	14.2102	19.2915
POU3F1	1.30833	3.35693	0	0	0	0	0	3.69038	0	3.37273	0.492097	0.219683	0	0	0	14.2695	0.544738	0	0.724208	3.60803	0.727908	0.0389501	0	0.409454	0	0	0	0	0	0.334629	0.478843	0.410828	0.629985	0.435481	0.574806	0.810978	1.43675	0.279549	1.52304	0	0	0	0	0	0.606154	337.532	1.72476	0	0.929709
RRAGC	22.9255	29.4755	19.8323	13.8604	43.4293	14.9924	19.9379	33.2135	24.4713	23.9838	15.255	21.7487	27.6217	11.8366	16.3825	14.8709	11.6115	25.7384	21.7262	12.2306	14.0382	10.0881	11.8647	11.5019	6.87208	11.4017	19.473	20.6973	9.1656	16.7314	20.5342	15.8088	15.1301	20.0321	18.558	29.9394	28.8718	15.9063	31.4762	40.8203	22.321	0	0	21.2085	20.0031	32.455	27.1258	19.8943	29.2858
MYCBP	6.46091	4.74883	0	12.4744	12.4084	14.9924	5.2012	1.84519	0	4.87172	5.90516	5.71177	0	2.95915	0	3.97741	5.14347	6.65958	5.06945	8.01105	4.26346	8.64692	8.30527	6.66294	6.87208	2.63117	0	2.43497	1.0184	4.6848	3.51152	1.84873	2.23645	1.30644	1.88865	3.75912	4.24183	1.81707	5.58449	0	0	0	0	5.30213	8.48616	19.473	17.718	2.84204	3.02156
GJA9	1.17373	0.245629	0	0.693022	0	0	0.866866	0	0	1.87374	0	0.549208	0	0	0	0.738077	0.96906	0.539966	0	1.0396	1.03987	4.16766	2.37293	1.63782	1.71802	3.50823	0	0.608743	4.0736	1.00389	1.40202	1.22846	1.49096	1.52418	1.97076	2.75255	3.89974	1.31388	3.55377	0	0	0	0	0	0	0	1.09757	0	0.929709
RHBDL2	2.67589	1.55565	0	1.38604	3.10209	1.49924	0.866866	0	0	8.6192	2.46048	1.53778	0	0	0	4.27811	2.86131	3.41978	4.34525	25.195	5.40732	2.14225	3.5594	1.67504	1.71802	3.50823	45.437	0.608743	8.1472	19.0738	4.36135	4.86549	5.48087	5.00803	5.33749	12.0263	12.9991	5.36733	26.3994	0	11.1605	0	0	0	3.03077	0	1.56796	19.8943	2.32427
AKIRIN1	54.9931	56.4128	59.4969	69.3022	40.3272	92.953	57.2132	68.2721	48.9425	50.2162	52.6543	43.4973	35.5136	97.6519	73.7212	67.821	92.8692	60.4762	67.3513	97.9671	45.8582	44.3641	40.3399	51.3307	54.9766	61.394	25.964	52.3519	42.7728	31.1205	56.085	45.3038	50.2938	38.9755	63.5572	64.3439	83.5366	39.2207	95.5455	0	33.4815	28.657	234.724	37.1149	43.0369	38.946	51.7428	48.3147	34.8641
NDUFS5	70.4239	98.4154	19.8323	63.065	31.0209	76.4613	36.4084	71.9625	73.4138	51.9025	65.9409	40.3119	47.3515	38.4689	57.3387	49.8612	63.8605	31.138	84.0081	64.6999	41.5948	33.6139	21.3564	73.9996	15.4622	42.9758	45.437	27.3934	18.3312	8.36572	27.8678	37.9009	34.5547	13.0644	22.1711	40.8113	40.4342	37.4595	63.6632	81.6407	55.8025	42.9855	0	15.9064	103.349	97.3651	197.877	62.5249	46.7179
MACF1	298.892	378.596	297.485	84.5487	452.905	487.254	419.563	131.009	391.54	417.469	263.272	541.739	51.2975	393.567	475.092	524.472	353.317	334.239	433.8	318.057	750.058	88.6114	584.928	333.854	414.043	627.973	402.442	407.249	591.69	1164.84	720.663	810.382	922.876	740.752	757.841	1426.62	1103.56	1197.75	855.137	81.6407	457.581	458.512	352.086	424.17	414.306	90.8741	897.972	360.939	385.132
KIAA0754	3.20353	3.60256	0	2.07907	3.10209	2.99848	3.46746	0	0	5.80859	0.492097	5.38224	0	0.986382	0	6.30099	4.15147	4.49972	5.79366	5.56492	4.57542	1.90855	5.93233	4.35511	3.43604	7.01646	6.49101	4.2612	7.1288	13.3851	8.07562	6.97199	8.4943	8.49187	10.8392	15.1796	15.3937	7.77145	9.64593	0	0	0	0	0	4.84923	0	6.58544	5.68408	2.5567
BMP8A	1.0822	0.327505	0	0	0	0	0.866866	0	0	0.374748	4.42887	0.439367	0	4.93191	0	1.14812	1.14108	0.539966	0.724208	0.794989	0.311961	0.311601	0	0.446677	0	0	0	0	1.0184	0	0.798072	0.632353	2.00545	0.435481	5.25537	5.94876	5.74699	0.866601	0.304608	0	0	0	0	0	0	0	0.940778	2.84204	0.464855
PABPC4	80.1314	60.5066	39.6646	53.3627	52.7356	58.4704	52.8788	46.1298	269.184	56.0248	75.7829	32.4033	51.2975	63.1285	8.19124	38.3116	42.3577	53.0967	52.8672	65.7395	29.6363	55.7376	30.8481	54.6063	24.0523	28.9429	19.473	27.3934	26.4784	20.4123	20.8189	23.5219	26.0919	25.9111	21.7605	38.5548	35.9187	26.9485	38.4822	40.8203	66.963	14.3285	0	53.0213	76.0723	19.473	297.443	53.9987	46.7179
HEYL	0.678395	3.1113	0	1.38604	0	1.49924	0	68.2721	0	25.4828	0.984193	0.439367	0	0	0	10.2101	9.4727	0	3.62104	1.46767	0.727908	0.2337	0	0.558347	0	0	6.49101	0	7.1288	0.669257	0.746305	0.173192	0.178496	0	0.328461	0.200359	0.20525	0.251594	49.8543	0	0	0	0	0	77.2846	38.946	38.1015	147.786	4.41612
NT5C1A	0.0915295	0.655011	0	0	0	0	0	0	0	0.187374	3.93677	0	3.94596	0	0	0.109345	0.0573408	0	0	0.122306	0.103987	0.11685	0	0.111669	0	0	0	0	0	0.334629	0.086278	0.0966654	1.01848	0	0.246346	0.376866	0.410499	0.363413	0	0	0	0	0	0	0	0	0.156796	0	0.232427
HPCAL4	0.301509	20.9603	0	1.38604	0	0	0.866866	0	0	1.68636	17.2234	0.109842	0	3.94553	0	0.109345	0.194959	0	1.44842	0.122306	0	0.1558	0	0.260562	1.71802	0	6.49101	0	0	0	3.70995	2.72274	14.9936	1.74192	2.29923	16.2673	43.3761	7.96714	2.43687	0	0	0	0	0	0.606154	0	2.66554	0	0.929709
PPIE	14.2463	20.7966	19.8323	14.5535	6.20418	23.9879	9.53553	31.3683	0	16.4889	26.0811	13.6204	27.6217	33.537	0	10.2921	12.6551	7.01956	15.9326	11.3745	9.87876	17.3717	10.6782	15.0381	8.5901	18.4182	12.982	12.1749	7.1288	9.3696	16.2763	8.76835	15.5291	5.44351	12.6457	24.0288	20.7986	12.1604	14.9258	0	33.4815	71.6425	0	10.6043	15.1538	51.928	35.1224	0	13.9456
BMP8B	0.274589	7.53263	0	0.693022	0	2.99848	2.6006	57.2009	0	0.562121	14.7629	0	0	0	0	0.259694	0.768367	0	5.06945	1.89574	0	0.701101	0	0.0744462	0	0	0	0	0	0	7.29912	0.54777	1.02898	0.435481	58.2197	0.744191	1.16308	0.754781	0.203072	0	0	0	0	0	3.03077	129.82	1.25437	0	1.16214
TRIT1	13.8694	13.7552	19.8323	17.3255	18.6126	17.9909	19.9379	9.22596	0	15.552	19.1918	11.6432	3.94596	5.91829	0	19.6957	27.4261	19.0788	17.381	27.8246	16.222	31.2769	26.1023	16.7876	15.4622	18.4182	32.455	25.5672	13.2392	21.4162	28.9031	26.2084	41.5895	16.1128	33.9136	60.8996	35.5766	30.6385	8.73211	0	0	42.9855	0	37.1149	20.9123	0	8.93739	19.8943	16.0375
MYCL	0.14537	3.43881	0	0.693022	3.10209	1.49924	2.6006	0	0	0.187374	0	0.109842	0	0	0	0.246026	1.06654	3.95975	0	16.8782	0.207974	0.19475	0	0.558347	0	0	0	1.21749	0	0	0.733363	2.17497	5.26038	0.870961	2.87403	2.42339	0.957831	1.67729	3.04608	0	0	0	0	5.30213	3.03077	0	1.56796	0	0.232427
MFSD2A	0.516873	0.409382	198.323	0	0	5.99697	2.6006	9.22596	0	0.936869	0	0.109842	0	1.97276	0	0.191353	0.928921	1.43991	0.724208	9.66218	0.207974	0.350551	1.18647	1.19114	1.71802	6.1394	0	3.04371	1.0184	0.669257	1.07416	1.91317	3.68541	5.66125	11.414	5.59574	7.11532	0.97842	532.76	0	0	0	0	5.30213	4.24308	0	2.35194	0	0.464855
CAP1	39.6592	87.6077	79.3292	45.7394	130.288	386.804	142.166	156.841	73.4138	59.0228	53.1464	115.883	15.7838	134.148	155.634	32.2977	27.2598	138.951	63.7303	45.3755	57.5048	21.3057	34.4075	36.4787	63.5667	157.87	38.946	84.6152	30.552	25.0972	55.0411	49.4886	40.6025	123.023	45.2455	51.4398	51.7913	40.4507	161.036	0	100.445	114.628	0	111.345	53.6446	103.856	34.0248	65.3669	48.8097
PPT1	27.4481	26.3642	19.8323	27.7209	27.9188	26.9864	104.891	49.8202	0	24.9207	41.3361	32.9525	0	18.7413	0	17.4268	21.9329	52.7367	24.6231	19.4467	16.5339	17.0212	21.3564	13.2142	6.87208	9.64763	45.437	82.789	17.3128	12.0466	48.4581	28.8184	35.4682	175.281	37.9372	40.1243	52.2018	23.538	24.1656	0	55.8025	0	0	47.7192	48.4923	12.982	13.6413	25.5784	37.1884
RLF	98.405	64.7642	198.323	99.7951	77.5523	101.948	115.293	64.5817	171.299	93.8743	104.324	93.695	169.676	132.175	139.251	131.706	119.739	134.991	126.012	127.932	100.139	156.112	131.698	79.5458	109.953	132.436	51.928	113.835	114.061	155.937	133.438	133.632	126.155	195.095	153.802	198.794	161.395	133.54	70.8722	122.461	89.284	143.285	0	95.4383	95.7723	71.4011	51.586	90.9452	100.641
TMCO2	0.113066	0.491258	0	0	0	0	0	0	0	0.374748	0.492097	0	0	0	0	0.314366	0.389918	0.359977	1.44842	0.489224	0.103987	0.2337	0	0.186116	0	0	0	0	0	0.669257	0.163928	0.169164	0.209995	0	0.16423	0.51998	0.752582	0.167729	0.101536	0	0	0	0	0	0.303077	0	0	0	0.232427
ZMPSTE24	57.6475	37.4175	19.8323	45.0464	37.2251	65.9666	43.3433	44.2846	0	46.4687	31.0021	38.9938	15.7838	22.6868	16.3825	18.5203	21.3881	14.7591	39.1072	22.0151	24.125	41.7155	21.3564	25.5351	32.6424	33.3282	12.982	32.8721	30.552	22.7547	47.8239	35.4198	46.0099	48.9916	48.1195	44.2698	46.318	34.077	43.6605	0	44.642	0	0	21.2085	28.4892	25.964	24.4602	31.2624	49.9719
COL9A2	27.6473	5.8951	0	2.07907	9.30628	10.4947	3.46746	12.9163	0	4.68435	8.85774	3.84446	0	5.91829	0	4.38746	38.4011	7.01956	2.17262	9.29526	0.831895	0.623201	7.1188	2.97785	3.43604	0	25.964	5.47868	0	2.00777	15.6595	4.21703	4.89288	4.35481	39.7438	53.9062	48.5757	7.85532	3.55377	0	0	0	0	5.30213	0.909231	25.964	2.66554	0	1.62699
SMAP2	16.863	31.0311	19.8323	63.065	152.003	35.9818	216.716	16.6067	0	18.7374	36.9072	42.8383	94.703	166.699	32.765	14.2695	10.0404	138.771	5.06945	12.1695	12.8944	90.1305	48.6451	62.5721	101.363	25.4347	6.49101	158.882	25.46	49.8597	22.937	43.7572	54.0002	282.409	65.0352	91.4306	72.4531	41.8205	17.0581	0	22.321	57.314	0	137.855	14.2446	6.49101	14.4253	36.9465	16.7348
ZFP69B	1.23834	8.10576	0	1.38604	6.20418	0	4.33433	5.53558	24.4713	1.31162	5.41306	2.08699	0	0	0	3.60837	5.02879	1.43991	4.34525	1.52883	1.45582	2.53175	3.5594	2.38228	3.43604	3.50823	0	2.43497	2.0368	1.67314	6.46654	11.5636	18.5321	4.79029	11.5782	27.0914	29.4191	16.1859	2.03072	0	0	0	0	0	3.63692	0	3.29272	0	3.02156
ZFP69	2.43899	5.07633	0	2.77209	0	4.49773	5.2012	0	0	4.49697	2.46048	3.40509	0	1.97276	8.19124	4.29178	3.26269	1.79989	2.89683	2.62958	2.59967	4.44031	3.5594	3.31286	5.15406	6.1394	0	3.65246	4.0736	6.02332	8.02386	7.36268	9.28178	5.00803	11.0856	14.2684	16.2831	7.24031	4.87374	0	0	14.3285	0	5.30213	2.42462	6.49101	5.17428	2.84204	6.74039
EXO5	2.75127	5.40384	0	4.85115	9.30628	5.99697	3.46746	9.22596	0	5.05909	4.92097	2.41652	0	2.95915	0	2.76095	3.65261	2.51984	3.62104	2.93534	4.05549	6.54361	2.37293	3.57342	3.43604	4.38529	0	5.47868	2.0368	3.01166	3.51152	3.26648	3.51742	1.74192	5.00903	5.14255	5.88382	3.80186	3.45223	0	0	14.3285	0	0	6.36462	6.49101	3.91991	2.84204	3.48641
ZNF684	16.3192	3.52068	0	5.54417	6.20418	7.49621	8.66866	5.53558	0	7.12021	2.46048	6.5905	7.89192	4.93191	0	6.91605	5.51619	2.87982	10.1389	6.84914	8.94288	8.10162	14.2376	16.3037	10.3081	5.26235	0	5.47868	5.092	7.69646	9.31803	6.34769	6.08986	5.22577	10.1002	6.36856	7.93632	5.78666	4.97527	0	0	0	0	0	6.97077	0	3.76311	8.52612	7.20525
RIMS3	1.43217	97.5147	0	2.07907	3.10209	4.49773	6.93493	1.84519	0	2.06111	34.4468	0.549208	0	1.97276	0	0.492051	1.35898	1.43991	1.44842	0.550377	1.24784	5.45301	0	1.11669	10.3081	2.63117	0	3.04371	0	1.33851	3.61936	9.86792	4.45189	6.74995	6.65133	30.4975	27.8455	6.28984	1.72611	0	0	0	0	0	1.51538	6.49101	0.783981	0	0.232427
NFYC	56.5222	44.8682	39.6646	35.3441	74.4502	73.4629	78.0179	36.9038	97.885	44.4076	46.7492	67.7723	23.6758	43.4008	8.19124	48.0433	47.8738	52.3767	43.4525	48.4943	58.0247	91.6495	92.5444	96.5568	91.0551	96.4763	90.8741	108.965	75.3616	66.5911	58.5914	51.4944	57.2027	60.3141	42.782	73.7179	58.5646	59.6277	45.5897	0	11.1605	85.971	0	63.6256	53.0385	25.964	58.7986	39.7885	39.0478
KCNQ4	0.759157	3.35693	0	9.00928	3.10209	28.4856	0	0	0	3.18535	6.88935	0.439367	0	0	0	1.48982	2.35671	0.359977	4.34525	2.87419	0.935882	12.3861	1.18647	1.86116	3.43604	27.1888	0	1.21749	16.2944	1.00389	2.40284	1.5104	3.72741	0.21774	1.31384	21.9298	13.4781	1.95684	2.13226	0	0	0	0	0	2.42462	0	57.2306	8.52612	1.85942
CITED4	9.02374	14.1646	0	2.07907	0	1.49924	4.33433	1.84519	0	3.74748	7.38145	3.18541	3.94596	4.93191	0	1.73585	9.22614	7.01956	8.69049	28.6196	4.99137	0.19475	1.18647	3.68509	0	0	6.49101	1.82623	1.0184	3.34629	2.2044	1.39359	2.33094	16.9837	3.03826	4.22185	4.78916	2.76753	4.7722	0	22.321	0	0	5.30213	2.72769	0	5.80146	0	1.62699
CTPS1	12.4696	35.0431	79.3292	18.0186	18.6126	40.4795	23.4054	11.0712	24.4713	27.9187	37.3993	11.2039	19.7298	37.4825	0	14.1191	19.3067	12.9592	23.1746	11.3745	16.3259	51.2583	33.2211	11.2786	54.9766	38.5905	12.982	14.0011	18.3312	11.3774	15.6767	17.5367	25.8609	10.6693	22.2532	40.8828	29.1454	12.2442	13.0982	0	0	0	0	10.6043	25.1554	0	8.467	5.68408	23.7076
SLFNL1	1.556	2.53817	0	0.693022	0	0	2.6006	0	0	1.31162	0.984193	0.549208	0	0.986382	0	1.46249	0.917453	0	0	0.672683	0.623922	0.662151	0	2.4195	5.15406	0	0	0	2.0368	1.33851	0.992197	2.14275	2.88743	0.435481	1.47807	16.1194	11.3571	1.78911	0.507681	0	11.1605	0	0	0	0.909231	0	0.470389	0	1.62699
SCMH1	268.709	193.146	118.994	86.6277	80.6544	64.4674	104.024	108.866	342.598	240.213	211.602	169.705	82.8652	108.502	81.9124	242.445	153.186	96.4739	184.673	151.843	167.523	250.838	415.263	318.258	426.069	90.3369	175.257	103.486	224.048	209.478	192.068	325.065	322.542	277.837	249.712	962.43	505.325	317.316	57.6725	163.281	145.087	128.957	352.086	127.251	169.117	136.311	114.775	221.679	226.384
FOXO6	3.6881	5.48572	19.8323	0	0	1.49924	0.866866	0	0	2.06111	1.47629	0.549208	0	1.97276	8.19124	1.17546	5.26962	0.359977	1.44842	8.86719	0.103987	0.428451	3.5594	0.707239	1.71802	0	25.964	0	0	0.669257	4.33978	4.20897	9.40778	0.435481	2.135	13.6626	9.23623	1.7332	1.01536	0	0	0	0	0	25.1554	0	15.8364	0	4.18369
HIVEP3	114.18	207.72	0	8.31626	145.798	16.4917	169.906	44.2846	24.4713	281.435	157.963	221.441	15.7838	99.6246	40.9562	98.2052	44.1983	90.7143	86.1807	27.3966	333.382	7.04996	96.1038	41.206	163.212	12.2788	434.897	205.755	104.895	297.82	45.6756	796.639	513.711	392.15	90.491	423.073	563.957	524.042	92.9056	0	245.531	114.628	0	74.2298	35.46	97.3651	31.0457	76.7351	54.1556
FOXJ3	97.592	80.4845	158.658	74.1533	108.573	80.9591	86.6866	77.4981	48.9425	109.988	80.7038	115.883	94.703	66.0876	98.2949	100.829	94.6009	57.7764	62.2819	82.1897	103.675	143.142	174.411	153.583	170.084	92.091	97.3651	121.749	174.146	169.657	141.53	146.432	156.74	122.37	126.047	180.605	178.978	146.036	84.5796	122.461	111.605	71.6425	0	116.647	134.566	58.4191	98.3113	71.051	116.214
RIMKLA	1.14681	16.9484	0	0	0	0	0.866866	3.69038	0	0.749495	10.334	0.329525	0	0	0	0.478383	3.69848	0.359977	0.724208	3.17996	1.03987	0.506351	1.18647	1.04225	0	0.877058	0	4.86994	0	0	12.6397	44.3815	36.8016	0.435481	13.2205	39.07	68.5534	15.5709	3.55377	0	0	0	0	0	2.12154	0	3.44952	0	0.929709
ZMYND12	2.85357	0.655011	0	0.693022	0	1.49924	0.866866	3.69038	0	1.31162	2.95258	0.439367	0	0	0	0.628732	1.04934	1.6199	1.44842	2.0792	0.415948	1.12955	1.18647	4.69011	0	4.38529	0	1.82623	1.0184	1.67314	0.931803	0.745129	1.35447	0.653221	0.492691	0.94455	1.91566	0.559097	0.913825	0	0	0	0	0	0.303077	0	0.783981	0	0.464855
PPCS	26.4197	17.6853	99.1615	14.5535	24.8167	25.4871	20.8048	11.0712	48.9425	20.7985	19.1918	14.7188	7.89192	13.8094	8.19124	8.58356	11.5427	17.8189	17.381	17.6121	11.1266	9.19222	14.2376	23.3761	6.87208	13.1559	12.982	16.4361	14.2576	5.68869	8.32152	7.46337	8.87229	8.49187	5.50172	11.6828	13.6149	6.37371	13.0982	0	33.4815	14.3285	0	15.9064	11.5169	6.49101	17.5612	17.0522	12.3186
CCDC30	32.7299	12.0358	0	8.31626	15.5105	8.99545	20.8048	18.4519	0	20.049	115.643	12.522	0	5.91829	65.5299	14.0508	60.3397	11.6993	15.9326	66.5345	15.598	12.6198	27.2887	30.9324	10.3081	34.2052	77.8921	27.3934	26.4784	26.7703	145.715	46.1376	65.676	23.0805	32.6819	61.7011	86.6837	73.4654	12.8951	0	33.4815	28.657	0	26.5106	16.0631	32.455	7.68302	19.8943	13.7132
PPIH	15.7431	16.539	0	24.9488	15.5105	19.4901	13.003	23.9875	24.4713	11.2424	7.38145	8.89718	19.7298	14.7957	8.19124	17.7138	19.2608	16.559	14.4842	19.0186	12.5824	46.3506	36.7805	13.3631	22.3343	25.4347	25.964	17.0448	12.2208	17.7353	18.3341	14.0044	14.9831	11.1048	16.7515	23.6567	19.2935	13.7538	11.6767	0	22.321	0	0	21.2085	15.4569	12.982	16.6204	14.2102	10.4592
YBX1	78.6723	96.696	59.4969	115.042	80.6544	92.953	61.5475	119.937	24.4713	56.3995	47.2413	53.0535	390.65	144.012	114.677	41.7697	66.8422	105.113	91.9744	60.4803	41.4908	95.8561	43.8993	55.9091	36.0784	37.7135	97.3651	56.0043	40.736	22.4201	52.7892	62.4378	64.416	44.2013	57.8091	68.5944	78.1317	50.179	91.9918	81.6407	66.963	128.957	0	42.417	107.592	84.3831	181.413	59.6828	53.9231
CLDN19	0.11845	0.0818764	19.8323	0	0	0	0	3.69038	0	0	0.984193	0.109842	7.89192	0	0	0.765413	13.1024	0.179989	0	23.972	0.207974	0.2337	0	10.5714	1.71802	0	0	0	0	0.669257	0.17687	0.0765267	0.0629985	0	0.0821152	0.10972	0	0	0	0	11.1605	0	0	0	0	58.4191	0.313593	0	0.232427
LEPRE1	47.1646	22.3522	19.8323	24.2558	15.5105	43.478	35.5415	46.1298	24.4713	74.2	27.5574	45.3646	0	13.8094	81.9124	40.3209	23.871	11.8793	98.4922	10.0902	28.8044	32.757	26.1023	39.6799	20.6162	38.5905	45.437	22.5235	40.736	38.1477	13.0452	15.2691	15.4031	17.8547	16.0125	19.9548	27.0245	14.6483	40.8175	0	89.284	0	117.362	5.30213	64.2523	58.4191	16.15	59.6828	187.104
C1orf50	21.7786	24.6448	79.3292	10.3953	12.4084	25.4871	13.8699	14.7615	0	17.051	19.1918	15.7074	15.7838	16.7685	32.765	12.6156	15.6426	6.2996	10.1389	11.5579	10.1907	22.5521	18.9835	25.0512	10.3081	9.64763	12.982	16.4361	8.1472	14.0544	17.0054	20.1386	22.564	11.758	17.4084	30.3019	33.8662	20.2393	12.3874	0	0	0	0	15.9064	17.5785	45.437	31.9864	8.52612	9.99437
CCDC23	12.9272	50.4358	19.8323	20.0976	12.4084	20.9894	9.53553	31.3683	0	14.9899	14.2708	17.4648	39.4596	7.89106	0	17.0578	19.1862	14.7591	37.6588	12.7198	20.7974	17.7223	10.6782	15.0754	10.3081	3.50823	6.49101	7.30491	6.1104	6.35794	13.606	28.3028	24.8004	10.6693	7.80094	31.7378	40.7078	34.9436	37.6699	40.8203	0	0	0	5.30213	26.6708	25.964	43.903	19.8943	17.6645
ERMAP	24.4545	8.10576	59.4969	345.818	18.6126	23.9879	24.2722	5.53558	24.4713	11.9919	8.85774	10.1054	564.272	0.986382	16.3825	8.52889	10.6711	16.9189	8.69049	16.9394	4.99137	392.188	72.3745	41.3177	34.3604	55.2546	19.473	54.1781	40.736	30.4512	9.70196	1.67151	1.76396	46.3787	4.26999	3.59692	3.62608	1.84502	5.38142	408.203	0	0	0	21.2085	7.88	0	6.58544	0	7.6701
ZNF691	5.05028	2.86567	0	1.38604	6.20418	0	4.33433	0	0	2.99798	3.93677	3.18541	0	1.97276	0	2.95231	4.24895	0.899943	5.06945	4.40302	2.18373	2.37595	3.5594	5.65791	0	0.877058	6.49101	7.91366	0	1.67314	4.91353	3.3994	3.96891	4.13707	4.8448	4.64165	4.78916	3.24276	3.45223	0	0	0	0	0	6.36462	0	4.54709	8.52612	5.1134
SLC2A1	136.966	61.4073	614.801	1374.96	21.7146	52.4735	43.3433	60.8913	48.9425	43.4707	66.433	25.4833	1337.68	11.8366	8.19124	7.44911	16.4281	3.05981	28.2441	99.3125	5.92725	606.57	113.901	61.1576	97.9271	51.7464	51.928	66.9617	41.7544	26.101	14.9649	15.692	18.8366	3.70158	34.7347	18.953	14.9148	17.8632	793.708	1224.61	33.4815	14.3285	0	10.6043	22.7308	12.982	32.7704	5.68408	16.2699
FAM183A	0.247668	0	0	0	3.10209	0	0	0	0	0.374748	0.984193	0.109842	0	0	0	0.0956766	3.00466	0.179989	0	0.61153	0	0.0779001	0	0.967801	0	1.75412	0	0	0	0.334629	0.677282	0.108749	0.146997	0	0.0821152	0.162196	0.0684165	0.139774	0.203072	0	0	0	0	0	0	0	0	0	0
EBNA1BP2	19.9481	29.803	0	30.493	12.4084	31.4841	17.3373	22.1423	24.4713	10.4929	15.255	15.268	39.4596	10.8502	16.3825	11.3308	21.0383	9.35941	20.2778	26.6016	12.5824	13.7494	48.6451	17.5693	15.4622	16.6641	64.9101	4.86994	6.1104	5.01943	12.4154	10.4882	14.0172	6.09673	7.63671	16.2005	14.2991	9.72829	16.9565	0	11.1605	0	0	26.5106	24.5492	58.4191	23.3626	28.4204	11.3889
WDR65	0.538409	0.163753	0	0.693022	0	0	0	0	0	0.936869	2.95258	0.439367	0	0	0	1.2848	2.72942	1.43991	0.724208	2.56843	1.14386	0.662151	0	0.893355	1.71802	2.63117	0	0.608743	0	0.334629	2.78678	2.68246	2.85593	0.653221	0.821152	1.86048	3.69449	1.34183	0.203072	0	0	0	0	0	0	0	0.783981	0	0
TMEM125	0.156139	0	0	0	0	0	0	0	0	0	0	0	0	0	0	0.136681	0.596344	0	0.724208	3.1188	0	0	0	0.446677	0	0.877058	0	0	0	0.669257	0.0776502	0.0563881	0.157496	0	0.574806	1.0018	0.136833	0.111819	1.62458	0	0	0	0	0	0	0	0	0	0
TIE1	3.41351	3.27505	19.8323	4.15813	24.8167	34.4826	1.73373	12.9163	0	5.24647	0.984193	311.401	0	7.89106	73.7212	9.56766	1.16975	2.51984	0.724208	0.489224	448.496	2.53175	45.0857	3.5362	6.87208	22.8035	6.49101	2.43497	6.1104	236.582	0.487471	0.600131	0.640485	1.0887	0.16423	0.935009	0	0.754781	396.702	0	424.099	0	0	0	1.51538	25.964	6.58544	8.52612	2.32427
MPL	0.14537	0	0	0.693022	6.20418	52.4735	0	0	0	0	0	0.329525	0	0	32.765	0.150349	0.275236	0.359977	0	0.244612	0.103987	0.545301	24.9158	0.335008	0	50.8693	0	0.608743	0	0.334629	0.116475	0.128887	0.325492	0	0.16423	1.36912	1.09466	0.195684	0.304608	0	0	0	117.362	0	0	0	0.313593	0	0
CDC20	2.80511	10.4802	0	47.1255	0	25.4871	3.46746	1.84519	0	3.37273	1.96839	9.00702	114.433	29.5915	0	5.22121	13.0106	16.379	3.62104	6.48222	9.98274	33.7308	15.4241	10.4225	22.3343	6.1394	0	7.30491	3.0552	5.35406	8.067	3.6169	0.545987	1.52418	4.02364	0.863453	0.752582	0.950465	7.41214	0	0	28.657	0	10.6043	21.2154	32.455	2.03835	19.8943	6.97282
ELOVL1	41.2906	14.7377	19.8323	94.944	27.9188	76.4613	34.6746	47.975	24.4713	29.9798	16.7313	41.63	90.7571	16.7685	32.765	6.57435	5.98065	17.2789	21.7262	27.3354	19.6535	84.5996	24.9158	28.7363	25.7703	34.2052	6.49101	24.3497	18.3312	15.3929	8.40348	3.37523	3.26542	26.9998	12.3173	4.40313	6.15749	2.48798	62.3432	204.102	11.1605	14.3285	0	37.1149	20.3062	12.982	12.3869	39.7885	27.6589
MED8	12.5665	12.2815	19.8323	13.1674	12.4084	17.9909	6.93493	20.2971	0	10.8677	13.7787	8.45781	11.8379	9.86382	0	6.36933	4.40377	5.03968	13.0357	4.58648	5.09536	11.6071	5.93233	15.5593	3.43604	3.50823	19.473	5.47868	9.1656	3.68092	4.07664	4.94604	5.60687	2.39514	4.10576	7.34173	8.82573	4.36096	9.44286	0	0	0	0	0	6.66769	6.49101	12.8573	11.3682	12.7835
SZT2	24.4492	17.6034	79.3292	31.879	9.30628	26.9864	32.9409	16.6067	24.4713	29.9798	21.6522	20.101	11.8379	28.6051	16.3825	23.2221	19.4271	20.5187	19.5536	19.5078	18.4057	96.0898	39.1534	31.0441	42.9505	32.4511	71.4011	42.0032	35.644	34.4668	29.2439	25.427	29.7668	30.9191	29.3151	36.2841	37.2186	27.1721	17.0581	81.6407	22.321	0	0	21.2085	29.3985	19.473	20.2267	8.52612	24.8697
HYI	9.58907	18.7497	0	2.07907	6.20418	17.9909	11.2693	22.1423	48.9425	9.18132	13.2866	7.02987	3.94596	0	32.765	8.9936	9.9773	5.57965	5.79366	8.62258	9.04686	3.93396	3.5594	25.4234	10.3081	18.4182	25.964	4.86994	9.1656	6.02332	9.77099	6.77866	6.18435	5.00803	10.2644	13.2953	9.37307	7.57577	11.169	0	0	0	117.362	10.6043	8.48616	19.473	10.035	22.7363	9.76195
PTPRF	38.6255	208.621	158.658	65.144	9.30628	8.99545	17.3373	118.092	97.885	52.0899	154.026	10.3251	55.2434	0.986382	16.3825	13.6681	142.521	3.59977	92.6986	357.99	9.5668	39.2227	9.49173	181.463	18.8982	15.787	720.502	14.6098	26.4784	10.3735	219.043	174.34	195.642	7.62091	100.345	258.802	200.324	77.2672	25.181	122.461	0	0	234.724	0	73.3446	45.437	27.7529	56.8408	30.2156
KDM4A	34.1836	31.9318	19.8323	16.6325	21.7146	20.9894	28.6066	16.6067	73.4138	30.5419	33.9547	18.3436	43.4056	22.6868	0	40.5942	38.7509	23.9385	37.6588	34.9184	34.1077	22.4742	29.6617	24.3439	29.2063	19.2953	45.437	23.1322	21.3864	30.1166	34.783	42.283	40.0986	22.8627	38.2657	46.8029	41.0499	33.1265	30.5624	0	22.321	0	0	21.2085	27.8831	19.473	22.8923	14.2102	24.6373
ST3GAL3	305.832	86.8708	59.4969	149	96.1649	143.927	96.2221	81.1884	244.713	137.158	113.674	95.8918	201.244	44.3872	81.9124	127.004	105.312	77.0351	98.4922	51.7355	117.401	480.099	232.547	156.263	170.084	352.577	116.838	104.704	172.11	204.793	198.72	212.813	214.163	122.152	136.64	220.886	260.12	178.352	58.2818	163.281	44.642	57.314	117.362	74.2298	106.986	90.8741	93.137	85.2612	111.333
ARTN	1.50755	1.31002	0	0	0	0	0.866866	5.53558	0	1.12424	0	0	0	0	0	0.478383	0.59061	0.179989	0.724208	0.244612	0	0.1558	0	0.0744462	0	0	0	0	2.0368	0	0.875722	1.20832	1.19697	0	0.246346	3.25345	1.71041	0.698872	0.406145	0	0	0	0	0	0.303077	6.49101	0.156796	0	0.697282
IPO13	17.0945	19.9778	0	20.0976	3.10209	10.4947	18.2042	25.8327	0	12.3667	19.1918	9.11686	3.94596	6.90468	16.3825	6.35566	8.33735	2.69983	10.8631	6.35991	6.23922	16.9822	7.1188	11.1297	3.43604	5.26235	19.473	10.3486	12.2208	8.70035	13.0927	16.276	15.9071	6.31447	18.3117	24.9829	29.0086	12.6356	20.8149	0	33.4815	14.3285	0	5.30213	18.1846	6.49101	25.2442	2.84204	9.29709
DPH2	15.7754	8.10576	19.8323	9.00928	12.4084	11.9939	12.1361	5.53558	0	6.74546	5.90516	5.49208	7.89192	1.97276	0	3.43069	5.21228	3.77976	10.1389	5.01455	2.80765	8.37427	9.49173	6.47682	0	3.50823	12.982	4.2612	4.0736	2.3424	3.92996	3.14968	4.87189	2.39514	3.69518	6.02509	6.15749	2.0407	5.17834	0	0	0	0	0	6.36462	6.49101	12.3869	8.52612	5.1134
ATP6V0B	102.276	104.884	59.4969	61.6789	58.9398	62.9682	85.8197	68.2721	48.9425	41.7844	83.6564	43.3875	15.7838	12.823	32.765	12.7387	25.293	66.4158	11.5873	30.0873	23.501	50.713	27.2887	49.879	30.9244	30.697	6.49101	60.8743	13.2392	14.0544	31.3621	95.2798	142.597	98.6363	61.1758	125.859	183.014	69.1883	46.6051	122.461	33.4815	14.3285	0	84.8341	34.2477	58.4191	30.7321	17.0522	27.194
B4GALT2	13.3256	45.032	59.4969	10.3953	3.10209	17.9909	7.80179	12.9163	0	18.55	11.8103	10.6546	3.94596	0	0	18.3426	15.2871	4.49972	35.4862	12.9644	9.87876	17.2938	9.49173	39.9404	3.43604	6.1394	25.964	9.13114	10.184	9.03497	19.4902	22.8251	31.3838	5.00803	24.224	51.9121	51.9966	18.7298	19.0888	0	11.1605	14.3285	0	0	29.3985	45.437	19.4427	31.2624	37.6532
CCDC24	11.4735	11.7083	0	3.46511	3.10209	2.99848	4.33433	5.53558	24.4713	2.81061	15.7471	1.53778	3.94596	0	0	1.83152	10.1436	1.97988	6.51787	18.774	3.11961	2.45385	0	19.0582	8.5901	12.2788	6.49101	7.30491	2.0368	1.33851	9.06782	13.5654	15.6341	3.70158	4.02364	31.2465	34.5504	7.40804	4.36605	0	0	0	0	0	0.606154	6.49101	1.09757	0	1.39456
SLC6A9	60.1026	11.4627	19.8323	163.553	9.30628	11.9939	9.53553	14.7615	48.9425	19.4869	9.34983	8.01844	438.002	0.986382	0	8.84325	3.57807	2.69983	12.3115	6.35991	1.03987	229.416	29.6617	15.3359	27.4883	16.6641	19.473	4.2612	16.2944	4.6848	42.2892	10.5043	16.7681	1.0887	24.6346	36.5322	25.1773	5.50711	3.85837	204.102	0	0	0	0	1.81846	6.49101	2.50874	56.8408	6.74039
KLF17	0.872223	0.0818764	0	0	0	0	0	1.84519	0	0	0	0	0	0	0	0.0956766	0.103213	0	0	0.183459	0	0.11685	0	0.297785	0	0	0	0	0	0	0.103534	0.132915	0.157496	0	1.39596	0.2099	0.273666	0.447278	0.203072	0	0	0	0	0	0	0	0.156796	0	0.232427
DMAP1	35.7073	16.4571	0	16.6325	9.30628	19.4901	9.53553	12.9163	0	11.2424	16.2392	13.9499	3.94596	5.91829	0	11.2215	10.4991	5.93963	13.7599	13.3314	11.0226	10.5555	10.6782	21.4405	15.4622	7.89352	12.982	9.73988	9.1656	8.03109	11.022	11.6885	12.7362	6.31447	10.7571	19.7401	20.3881	9.61647	12.0828	0	11.1605	0	0	0	10.6077	6.49101	20.2267	8.52612	7.20525
ERI3	71.7538	59.1147	19.8323	33.265	71.3481	44.9773	58.9469	35.0586	48.9425	61.8334	83.6564	50.3075	7.89192	26.6323	0	68.1217	72.7081	29.6981	57.9366	69.6533	58.6486	91.0263	71.188	61.0459	63.5667	53.5005	90.8741	65.1355	78.4168	63.2448	93.4218	70.026	82.8115	59.8786	95.2536	105.723	96.6726	66.5605	40.3099	40.8203	100.445	14.3285	0	42.417	60.0092	84.3831	53.1539	56.8408	69.4958
RNF220	24.2876	39.4644	19.8323	60.9859	43.4293	125.936	20.8048	40.5942	48.9425	23.047	29.5258	19.8813	27.6217	57.2102	40.9562	14.7069	18.9511	23.9385	23.8989	17.8567	50.2257	49.8171	1658.68	46.4172	68.7208	176.289	32.455	29.8284	11.2024	16.7314	21.4056	475.827	24.1914	13.9354	27.9192	21.3382	25.0405	21.8327	274.757	0	44.642	42.9855	0	5.30213	30.9139	90.8741	55.5059	31.2624	21.6157
TMEM53	12.5611	9.74329	0	4.85115	3.10209	10.4947	15.6036	14.7615	0	8.6192	28.0495	6.81019	3.94596	0.986382	24.5737	6.24632	7.27081	7.55952	13.0357	12.5364	6.3432	8.53007	15.4241	31.5652	6.87208	1.75412	12.982	11.5661	8.1472	10.0389	11.3585	8.80863	11.0982	8.70961	7.06191	20.4462	29.6928	8.47032	9.74747	0	0	0	0	5.30213	8.18308	0	6.74224	8.52612	6.27554
C1orf228	29.4348	7.77825	0	4.85115	3.10209	5.99697	0.866866	5.53558	24.4713	5.62121	33.4626	2.30668	3.94596	3.94553	0	3.93641	12.0645	8.45947	4.34525	23.9108	2.70366	2.68756	28.4752	75.4885	10.3081	7.89352	12.982	3.65246	3.0552	4.35017	36.2583	19.2686	16.7051	1.74192	5.74806	19.4062	21.4828	19.5404	2.2338	0	0	14.3285	0	5.30213	2.12154	0	3.76311	2.84204	3.02156
KIF2C	5.56177	25.5454	0	54.7487	12.4084	44.9773	14.7367	18.4519	0	10.4929	3.44468	16.3664	130.217	43.4008	16.3825	20.4201	24.9547	12.4192	31.1409	11.0075	18.3017	125.263	43.8993	12.6559	44.6685	34.2052	12.982	20.0885	12.2208	11.0427	22.6092	11.044	2.06845	16.9837	21.6784	3.09126	3.48924	2.5998	9.84901	40.8203	11.1605	0	0	10.6043	35.46	25.964	2.97913	19.8943	14.4105
RPS8	628.835	558.888	396.646	650.747	893.403	437.779	498.448	824.801	538.368	589.478	544.259	496.814	690.543	1413.49	417.753	662.438	530.534	537.086	993.613	738.239	453.175	310.471	386.788	530.839	211.316	185.059	811.376	202.103	281.078	105.743	207.477	262.664	191.379	246.7	139.432	121.041	124.587	159.706	628.813	530.664	558.025	673.44	704.172	503.702	1362.63	739.975	2265.55	704.826	638.245
BEST4	5.00182	1.06439	0	0	0	0	0.866866	0	0	0.187374	0.984193	0.109842	0	0	0	0.0410043	0.539004	0	0	0.672683	0.311961	0	0	0.372231	0	0	0	0.608743	0	0	0.457274	2.18303	4.3259	0.21774	0.410576	7.07936	14.778	2.09661	0.406145	0	0	0	0	0	0	0	1.41117	0	0.464855
PLK3	3.96807	2.04691	59.4969	1.38604	9.30628	2.99848	4.33433	3.69038	24.4713	8.24445	2.95258	3.73462	15.7838	19.7276	8.19124	16.47	5.80862	8.81944	18.8294	8.43912	9.98274	1.0127	1.18647	1.9356	3.43604	4.38529	0	5.47868	6.1104	7.0272	3.01973	12.8927	8.3998	24.3869	2.62769	6.1682	8.62048	5.25551	9.64593	0	0	0	0	0	2.42462	0	2.97913	2.84204	11.6214
BTBD19	7.25237	0.736887	39.6646	1.38604	0	4.49773	3.46746	1.84519	0	8.05707	15.255	7.57908	0	0	0	16.1557	4.78222	5.93963	10.1389	7.52182	12.8944	0.740051	0	5.13679	0	11.4017	6.49101	5.47868	12.2208	13.7198	1.83341	1.73595	0.661484	18.5079	0.0821152	0.658323	0.957831	0.531142	8.4275	0	0	0	0	0	3.33385	6.49101	1.09757	5.68408	6.50796
PTCH2	6.30477	1.22815	0	2.77209	3.10209	5.99697	3.46746	1.84519	0	77.3854	8.85774	1.53778	0	4.93191	0	35.6464	14.0829	1.25992	87.6291	6.29876	2.80765	4.47926	3.5594	3.08952	3.43604	7.01646	25.964	10.9574	11.2024	2.67703	94.6772	29.1366	25.3044	2.61288	14.8629	62.3355	57.1278	29.716	1.52304	81.6407	11.1605	0	117.362	21.2085	1.81846	6.49101	4.86068	88.1032	53.6907
EIF2B3	69.5624	38.9731	59.4969	68.6092	58.9398	58.4704	87.5535	31.3683	97.885	81.1329	37.3993	36.5773	31.5677	44.3872	16.3825	75.3658	55.5518	51.4768	112.976	49.4728	51.2656	189.181	106.782	68.9	115.107	81.5663	58.4191	122.357	107.95	57.2215	92.2441	96.4801	102.31	82.7413	87.9454	117.802	132.181	111.568	28.5317	81.6407	0	57.314	0	63.6256	45.1585	25.964	43.5894	133.576	88.09
HECTD3	13.1103	11.3808	19.8323	21.4837	6.20418	20.9894	10.4024	9.22596	0	16.6763	4.92097	11.5334	3.94596	5.91829	8.19124	8.14618	5.94051	10.2594	21.002	9.47872	8.63091	22.0068	8.30527	9.04522	5.15406	18.4182	12.982	12.1749	4.0736	9.3696	14.279	20.9724	16.4846	8.70961	10.1823	18.5618	15.8042	19.2889	19.7996	0	11.1605	0	117.362	5.30213	16.9723	19.473	18.3452	31.2624	12.7835
UROD	28.8533	22.4341	19.8323	254.339	21.7146	167.915	17.3373	29.5231	24.4713	21.3606	16.7313	15.4877	528.759	20.714	90.1037	12.356	12.6494	11.3393	21.002	9.17295	12.2705	221.003	46.2722	73.7018	27.4883	114.017	58.4191	43.2207	35.644	19.0738	10.0039	7.19351	6.87734	5.44351	5.50172	7.5087	9.16782	6.23393	20.4088	163.281	33.4815	0	0	31.8128	19.0939	19.473	33.084	14.2102	28.821
ZSWIM5	253.914	70.0862	39.6646	12.4744	37.2251	8.99545	8.66866	31.3683	318.126	36.1631	99.8956	9.55623	0	5.91829	0	11.4949	83.9756	7.73951	17.381	46.2317	6.55118	23.7595	43.8993	184.813	12.0261	19.2953	45.437	9.73988	36.6624	39.8208	209.988	411.041	352.099	10.2338	257.267	421.517	333.257	385.358	41.3252	40.8203	0	42.9855	0	15.9064	4.24308	51.928	9.09418	14.2102	20.4536
HPDL	0.909911	2.70192	19.8323	10.3953	6.20418	4.49773	0.866866	9.22596	0	0.749495	1.96839	0.329525	0	6.90468	0	0.902094	2.5918	0	1.44842	1.10075	0.311961	5.14141	2.37293	1.07947	0	5.26235	0	0.608743	0	0	0.716108	1.01096	0.871479	0	0.574806	0.381636	0.410499	1.09024	0.507681	0	0	0	0	0	0.909231	0	1.88156	2.84204	0
MUTYH	6.83779	7.53263	19.8323	4.85115	6.20418	13.4932	3.46746	16.6067	24.4713	5.43384	4.92097	5.38224	0	19.7276	0	5.84994	8.48644	5.03968	4.34525	7.82759	4.67941	13.3209	15.4241	10.0875	12.0261	8.77058	0	6.08743	10.184	9.3696	9.92197	8.55488	7.50732	6.96769	9.36113	9.40257	11.0835	9.19715	4.67066	0	11.1605	0	0	5.30213	8.18308	12.982	6.42865	11.3682	8.83224
TOE1	4.98028	7.6145	0	4.15813	15.5105	23.9879	1.73373	5.53558	48.9425	5.05909	7.87354	4.50351	7.89192	5.91829	0	2.59694	3.80743	1.43991	3.62104	2.75189	4.67941	8.14057	3.5594	3.46175	3.43604	4.38529	0	2.43497	4.0736	5.35406	3.35622	2.60594	3.04493	1.95966	3.20249	3.73527	2.39458	2.93526	3.95991	0	0	0	0	0	6.66769	6.49101	5.01748	2.84204	5.1134
TESK2	22.9093	4.25757	59.4969	84.5487	18.6126	26.9864	77.1511	9.22596	122.356	24.3586	8.36564	47.0122	130.217	32.5506	49.1475	20.7345	32.4148	49.3169	21.002	51.4908	48.042	230.623	65.2557	96.5568	68.7208	107.878	38.946	48.0907	49.9016	113.774	8.5027	10.7701	11.2032	43.1126	19.6255	7.78538	9.9204	24.0412	9.13825	40.8203	11.1605	0	117.362	68.9277	6.36462	0	8.62379	14.2102	11.1565
CCDC163P	2.85895	1.63753	0	0	0	0	0.866866	1.84519	0	1.12424	3.44468	1.42794	0	0	0	0.546723	0.745431	0	0	1.10075	0.415948	0.623201	0	0.893355	0	1.75412	0	0	1.0184	0.334629	1.41496	0.535687	0.482989	0.435481	1.23173	1.22124	1.29991	0.307503	1.1169	0	0	0	0	0	1.81846	0	1.09757	2.84204	1.62699
MMACHC	5.37871	2.94755	19.8323	5.54417	0	1.49924	0.866866	7.38077	0	2.81061	0.984193	1.53778	0	3.94553	0	2.28257	2.45419	2.51984	3.62104	2.62958	2.18373	4.79086	3.5594	8.3752	1.71802	0.877058	6.49101	2.43497	2.0368	0.334629	3.48132	2.41261	3.37042	2.1774	2.62769	4.58441	5.95224	1.78911	2.74148	0	0	0	0	5.30213	3.33385	6.49101	3.91991	0	3.25398
PRDX1	96.4344	61.9804	178.491	79.6975	77.5523	52.4735	69.3493	86.724	73.4138	61.646	60.5279	68.2117	35.5136	41.4281	0	25.614	42.415	27.1783	49.9703	50.3901	65.1998	20.6435	51.0181	139.587	24.0523	20.1723	64.9101	71.2229	17.3128	15.7275	26.6599	38.4084	35.9302	35.9271	39.0047	15.2655	12.1097	43.3021	61.2263	0	78.1235	28.657	0	53.0213	49.0985	25.964	70.4015	48.3147	40.6748
AKR1A1	40.8491	33.2418	59.4969	22.1767	18.6126	43.478	78.8848	35.0586	24.4713	35.7884	35.4309	25.4833	0	23.6732	0	25.6003	46.9507	59.9362	56.4882	32.2276	25.9967	26.6029	72.3745	92.6484	61.8487	16.6641	38.946	140.62	25.46	34.4668	31.6683	42.7341	23.9079	118.668	27.098	28.265	34.003	31.3094	26.704	40.8203	44.642	14.3285	0	84.8341	59.4031	58.4191	39.983	48.3147	47.6476
NASP	22.7855	60.916	59.4969	57.5208	43.4293	56.9712	48.5445	57.2009	24.4713	41.0349	35.4309	40.971	86.8111	71.0195	65.5299	65.6888	108.317	55.6165	60.8334	63.7214	74.3506	147.037	129.325	44.7794	104.799	50.8693	64.9101	63.3092	54.9936	64.5833	113.184	71.4075	67.4504	53.7818	93.1186	36.785	65.201	61.8362	45.8943	0	44.642	71.6425	0	47.7192	63.6462	32.455	23.3626	53.9987	37.6532
CCDC17	1.27065	0.0818764	0	1.38604	0	0	0.866866	0	0	0.374748	0.492097	0.329525	0	0	0	0.259694	0.0974794	2.51984	0	0.183459	0.207974	2.2591	0	3.46175	1.71802	0.877058	0	2.43497	1.0184	2.00777	0.245892	0.334301	0.251994	0	0.16423	0.271916	0.342083	0.279549	0.101536	0	0	0	0	0	0.303077	0	0.627185	0	1.39456
GPBP1L1	90.2589	50.9271	19.8323	139.297	55.8377	50.9742	97.9559	51.6654	73.4138	77.198	71.8461	81.2829	149.946	80.8834	73.7212	75.5572	92.399	58.4963	47.7977	102.37	89.8447	161.448	136.444	233.724	120.261	96.4763	64.9101	150.968	139.521	132.848	92.5806	63.8716	62.631	102.556	66.5954	64.0529	93.457	58.2859	60.3125	163.281	78.1235	143.285	0	111.345	71.5262	71.4011	61.7777	85.2612	65.3121
TMEM69	18.6828	15.884	0	15.9395	6.20418	34.4826	12.1361	12.9163	0	17.8005	11.8103	13.2908	0	14.7957	16.3825	9.54032	9.90276	7.9195	10.8631	10.0291	6.96712	23.7206	17.797	17.7927	29.2063	7.89352	19.473	10.3486	10.184	11.0427	14.9304	12.9652	16.8311	11.5402	14.1238	20.2363	20.046	15.4311	11.5751	0	22.321	14.3285	0	5.30213	15.4569	12.982	24.617	8.52612	15.5726
IPP	27.012	15.229	19.8323	13.1674	15.5105	10.4947	12.1361	20.2971	0	22.1101	18.6997	14.0597	39.4596	20.714	0	20.3654	27.7415	6.83957	35.4862	23.6662	17.5738	23.9153	7.1188	27.6196	15.4622	8.77058	6.49101	8.5224	16.2944	6.35794	21.8499	17.1984	16.2116	2.39514	19.3792	26.6621	29.5559	18.1427	17.1596	0	11.1605	0	0	5.30213	22.7308	25.964	21.3243	5.68408	21.8482
MAST2	94.1516	94.6491	118.994	59.5999	37.2251	28.4856	85.8197	46.1298	171.299	93.8743	45.765	48.1107	90.7571	29.5915	8.19124	106.242	77.3298	65.1559	90.5259	41.156	76.6384	138.39	116.274	95.2912	118.543	64.0252	51.928	116.27	211.827	74.6222	121.812	200.653	282.328	96.4589	136.968	144.707	331.615	267.696	45.8943	285.742	44.642	71.6425	0	58.3234	63.6462	64.9101	134.845	85.2612	108.544
PIK3R3	8.53917	63.7817	0	4.15813	6.20418	4.49773	37.2752	14.7615	48.9425	23.047	54.6227	75.5711	11.8379	9.86382	40.9562	80.3	61.3776	11.6993	18.8294	30.393	88.4929	19.5529	26.1023	8.33798	34.3604	9.64763	71.4011	182.014	97.7664	123.478	174.696	307.642	238.586	15.0241	205.042	131.188	130.539	160.237	58.6879	0	0	14.3285	0	15.9064	27.8831	25.964	28.2233	22.7363	22.0806
TSPAN1	0.20998	1.7194	0	0	0	0	0.866866	1.84519	0	0	0	0.109842	0	0	0	0.28703	1.12388	0	0	36.6307	0.831895	0.1558	0	0.223339	0	0	0	0.608743	0	0.334629	0.146673	0.676658	0.703483	0	0	0.782355	0.957831	0.307503	0	0	0	0	0	0	0.303077	0	0.156796	2.84204	0
POMGNT1	40.6068	41.0201	59.4969	12.4744	34.123	25.4871	19.0711	33.2135	0	28.6682	50.1938	19.2223	19.7298	7.89106	0	18.5613	20.0808	6.11961	23.8989	22.4432	13.5183	8.72482	22.5429	28.699	8.5901	10.5247	19.473	7.30491	21.3864	8.03109	30.2448	28.9875	34.2607	15.895	35.1453	66.5574	71.0848	28.4301	20.9164	0	11.1605	14.3285	0	15.9064	36.6723	32.455	37.4743	45.4726	20.4536
LURAP1	5.30871	2.12879	19.8323	0	0	1.49924	4.33433	9.22596	0	2.62323	3.93677	1.20826	7.89192	0.986382	0	1.65384	1.67435	0.719955	0.724208	5.13685	0.623922	0.545301	2.37293	1.04225	1.71802	0	0	1.21749	2.0368	1.67314	3.42092	1.33318	1.50146	16.1128	8.37575	4.50808	4.58391	1.06228	0.913825	0	0	0	0	0	2.42462	12.982	1.88156	2.84204	4.88097
RAD54L	3.80655	5.8951	0	24.9488	0	10.4947	5.2012	5.53558	0	5.99596	3.44468	6.70034	67.0813	10.8502	0	6.424	12.7813	8.99943	3.62104	5.50377	6.13523	73.4988	33.2211	7.66796	39.5145	18.4182	6.49101	10.3486	12.2208	8.70035	10.5949	5.26423	3.38092	6.09673	10.7571	2.88613	1.84725	3.82982	2.74148	0	0	28.657	0	0	16.0631	12.982	2.66554	5.68408	7.6701
LRRC41	78.92	74.5075	39.6646	62.372	34.123	70.4644	37.2752	59.0461	122.356	68.3914	79.7196	52.9437	11.8379	25.6459	16.3825	50.0389	56.5323	37.2576	55.764	47.8217	36.7074	74.4336	41.5263	66.5922	49.8226	56.1317	32.455	38.9595	58.0488	55.2137	58.2506	61.3946	62.904	47.2496	60.2726	65.4363	64.1063	57.587	54.9311	122.461	33.4815	28.657	0	47.7192	99.4093	71.4011	75.5758	53.9987	80.8847
UQCRH	59.7688	72.4606	79.3292	82.4696	52.7356	127.436	56.3463	62.7365	48.9425	54.3384	73.8145	54.2618	102.595	90.7472	65.5299	64.3904	68.0234	43.0173	63.7303	72.0994	34.9396	87.2092	67.6286	65.8477	61.8487	92.091	51.928	32.2634	30.552	23.424	33.2947	43.8619	42.7445	36.1449	29.3972	57.3123	79.7053	39.1368	57.4695	81.6407	100.445	71.6425	234.724	63.6256	94.56	45.437	182.354	45.4726	46.253
NSUN4	43.2666	16.1296	19.8323	22.1767	34.123	26.9864	29.4734	9.22596	24.4713	21.1732	31.0021	27.2407	11.8379	14.7957	24.5737	27.6232	31.0959	32.9379	32.5893	30.76	31.1961	33.1855	41.5263	30.1507	22.3343	36.8364	25.964	27.3934	21.3864	24.0933	23.4806	15.2772	19.8445	28.7417	25.8663	35.7212	35.5082	9.75625	20.5103	0	11.1605	0	0	15.9064	13.9415	38.946	19.4427	14.2102	18.5942
FAAH	9.34678	12.2815	0	2.07907	3.10209	0	5.2012	7.38077	0	6.37071	16.7313	1.97715	0	0	8.19124	1.55816	5.79716	5.21967	3.62104	7.94989	0.311961	1.0127	7.1188	11.2786	8.5901	0	32.455	3.65246	4.0736	1.33851	5.14217	12.353	14.7207	1.0887	13.0563	26.7002	31.0611	8.86169	1.72611	0	0	14.3285	0	0	4.84923	0	20.3835	2.84204	4.41612
MKNK1	43.7834	20.7147	59.4969	28.4139	18.6126	64.4674	255.725	14.7615	73.4138	31.6662	28.5416	30.8655	35.5136	25.6459	49.1475	18.5613	10.4074	167.749	18.1052	18.8351	19.2376	40.586	33.2211	48.874	34.3604	128.05	6.49101	289.762	33.6072	36.4745	26.6168	21.1939	27.3204	545.004	21.1857	7.25109	69.3744	23.9014	22.4395	0	55.8025	14.3285	0	243.898	29.3985	25.964	16.15	25.5784	26.9616
MOB3C	1.63138	1.3919	0	2.07907	3.10209	10.4947	9.53553	12.9163	0	2.81061	3.44468	2.85588	0	0	8.19124	2.06388	0.751165	9.89938	2.89683	1.89574	2.3917	2.60965	1.18647	3.0523	1.71802	21.0494	0	12.7836	2.0368	4.6848	1.2424	1.02707	0.650985	10.4515	0.903267	0.133573	1.57358	1.00638	5.07681	0	0	0	0	10.6043	7.57692	0	1.88156	2.84204	6.04311
ATPAF1	57.7174	46.5058	79.3292	37.4232	34.123	29.9848	29.4734	31.3683	24.4713	31.8535	34.9389	23.2864	27.6217	23.6732	32.765	18.9713	23.7047	13.8591	12.3115	21.8316	16.6379	41.7934	16.6105	54.6808	17.1802	32.4511	38.946	15.8273	21.3864	18.0699	36.5646	37.776	47.9629	31.1369	44.178	37.6771	68.2113	45.9578	24.4702	0	33.4815	14.3285	0	15.9064	33.9446	25.964	47.8229	19.8943	33.2371
EFCAB14	43.4442	30.7036	198.323	58.2138	71.3481	71.9636	62.4143	77.4981	97.885	54.5258	57.5753	82.2714	55.2434	59.1829	32.765	37.1909	34.0604	68.7557	64.4545	101.086	80.0699	53.5564	53.391	51.9635	65.2848	47.3611	51.928	62.7005	47.8648	47.1826	56.456	34.1913	33.2107	77.5155	63.4751	43.7737	42.2814	37.4595	176.165	0	78.1235	28.657	0	79.5319	76.9816	84.3831	93.137	82.4191	76.0037
CYP4B1	0.26382	0.245629	0	0	0	0	0	0	0	1.12424	0	0.219683	0	0	0	0.369038	0.40712	0.719955	0	15.4717	0.311961	0.19475	0	0.260562	0	0	19.473	0	0	0.334629	0.181184	0.201386	0.178496	0	0.246346	0.295768	0.273666	0.279549	0.203072	0	0	0	0	0	0	0	0.313593	0	0.697282
CYP4A11	1.34602	0.327505	0	0	3.10209	0	0	1.84519	0	0.187374	0	0.219683	0	0	0	0.0820085	0.103213	0	0	0	0	10.2439	5.93233	405.695	10.3081	9.64763	6.49101	17.0448	13.2392	7.36183	0.172556	0.334301	0.776982	0.21774	0.16423	4.14553	1.77883	0.838646	0.203072	0	0	0	0	0	0.303077	0	0.313593	2.84204	0.464855
CYP4X1	0.882991	1.47377	0	1.38604	3.10209	0	0.866866	0	0	40.6601	1.47629	1.75747	0	0	0	4.74283	1.5482	0.179989	13.0357	12.9644	3.01562	0.934802	0	10.4225	1.71802	0	116.838	3.04371	12.2208	1.67314	1.78596	14.2018	30.9428	1.0887	1.97076	72.9927	69.8533	11.154	10.9659	0	33.4815	0	0	0	1.21231	0	1.56796	39.7885	2.09185
CYP4Z1	0.312277	0.245629	0	0	0	0	0	0	0	6.55808	0.492097	0.329525	0	0	0	0.423711	0.263768	0	2.17262	0.978448	0.103987	0.662151	0	1.78671	0	0.877058	32.455	0.608743	7.1288	0.334629	0.319229	1.72789	4.99788	0.435481	0.16423	15.6519	17.4462	0.838646	0.101536	0	0	0	0	0	0.909231	0	0.156796	0	0.697282
PDZK1IP1	0.0538409	0	0	2.77209	0	2.99848	0	0	0	0.187374	0	0.109842	0	0	0	0.0273362	0.636483	0	0.724208	0	0.415948	1.75275	1.18647	1.22836	1.71802	0.877058	51.928	0	0	1.33851	0	0	0	0	0	0	0	0	0	0	0	0	0	0	0	0	0	0	0
TAL1	1.1845	0.573135	0	166.325	3.10209	233.882	14.7367	1.84519	0	0.936869	2.46048	33.1722	339.353	0	155.634	0.136681	0.0974794	0.539966	0	0	20.0695	149.568	41.5263	29.5179	13.7442	156.116	19.473	37.742	17.3128	36.1399	0.133731	0.197358	0.125997	94.717	0	0.224211	0.410499	0.139774	17.7688	204.102	66.963	14.3285	117.362	0	0.303077	0	1.56796	2.84204	0.929709
STIL	9.03989	18.9953	0	69.3022	12.4084	43.478	19.9379	12.9163	48.9425	13.3035	6.88935	20.7601	209.136	40.4417	57.3387	25.0809	37.7819	30.7781	19.5536	22.5655	33.0678	240.283	80.6797	17.346	109.953	94.7222	0	22.5235	18.3312	21.0816	28.5839	12.6833	5.34437	36.1449	23.5671	9.76035	7.0469	4.80824	9.84901	0	0	0	0	26.5106	29.7015	6.49101	4.70389	31.2624	17.432
CMPK1	29.6663	29.3936	0	37.4232	43.4293	56.9712	37.2752	42.4394	24.4713	39.7232	29.5258	34.6001	19.7298	27.6187	32.765	21.8006	17.0417	23.3985	34.762	17.979	32.5479	60.061	29.6617	86.7299	46.3865	55.2546	38.946	37.1333	41.7544	49.1904	33.8555	38.3802	45.1489	24.8224	30.9574	60.5419	61.9854	42.7989	45.8943	0	22.321	71.6425	0	15.9064	33.0354	25.964	45.4709	48.3147	31.8425
FOXD2	0.177675	0.0818764	0	0	0	1.49924	0	5.53558	0	10.8677	0.492097	0	0	0	0	6.97072	5.22375	0.179989	10.1389	0.122306	0	0.0779001	0	0.148892	0	0	0	0	0	0	0	0	0	0	0	0	0	0	0	0	0	0	0	0	0	25.964	0	0	0.232427
TRABD2B	3.96807	13.919	0	1.38604	3.10209	0	0	20.2971	0	41.0349	40.3519	1.42794	15.7838	0	0	32.4754	536.085	3.2398	57.2124	24.2166	19.1336	0.895852	0	44.3327	3.43604	1.75412	292.095	2.43497	20.368	8.36572	38.8035	0.716935	0.682484	0.21774	0.739037	32.1338	1.02625	1.06228	1.72611	81.6407	33.4815	0	0	0	1.21231	19.473	1.88156	59.6828	99.9437
SLC5A9	0.220748	1.3919	0	0	0	0	0	0	0	0.374748	0.492097	0.549208	0	0	0	0.218689	1.14108	0.359977	0	0.672683	0.311961	0.545301	1.18647	33.0541	0	1.75412	6.49101	0.608743	4.0736	1.00389	0.625516	0.0483327	0.104998	1.95966	0.328461	0.0810978	0.273666	0.111819	0.101536	0	0	0	0	0	0	0	0.156796	0	1.62699
SPATA6	61.3463	24.6448	0	7.62324	9.30628	8.99545	49.4114	177.138	48.9425	131.536	49.2097	79.8549	0	0.986382	16.3825	80.5734	50.2535	17.6389	79.6628	56.2608	31.924	3.15496	43.8993	20.9566	13.7442	7.01646	123.329	35.3071	161.926	26.101	549.617	27.7067	38.0091	127.16	407.374	8.93506	47.3442	46.433	23.6579	0	44.642	0	0	100.74	125.171	214.203	20.2267	62.5249	136.667
AGBL4	7.59157	404.224	39.6646	4.85115	3.10209	5.99697	157.77	20.2971	0	6.18334	2392.57	4.61335	3.94596	2.95915	0	8.9526	75.6325	13.4991	7.96628	107.935	5.71928	4.79086	2.37293	7.85408	6.87208	4.38529	12.982	265.412	12.2208	2.3424	469.18	95.59	209.586	76.2091	39.9901	18.8194	911.103	239.014	12.7936	0	33.4815	14.3285	0	15.9064	4.84923	6.49101	4.0767	2.84204	4.41612
BEND5	6.56321	40.6926	0	1.38604	6.20418	2.99848	0.866866	7.38077	0	9.93081	35.923	3.07557	0	3.94553	0	11.7956	11.0324	2.87982	15.2084	11.1298	6.96712	1.0906	4.74587	10.2364	5.15406	1.75412	6.49101	3.04371	6.1104	3.34629	20.4738	27.4328	32.6647	1.52418	20.6109	22.2351	74.3688	35.2511	8.93518	0	22.321	0	0	0	10.3046	6.49101	9.56457	14.2102	15.5726
ELAVL4	3.61811	795.183	0	2.77209	0	5.99697	24.2722	18.4519	0	5.80859	241.619	3.84446	0	0	0	1.25746	37.9654	10.0794	0	2.14036	0.831895	1.1685	15.4241	3.23841	0	1.75412	0	55.3956	0	1.67314	60.8476	253.771	503.043	67.064	23.6492	12.6322	1619.69	212.569	22.8456	0	0	0	0	0	0.606154	0	2.97913	0	1.16214
DMRTA2	0.123834	0.573135	0	0	3.10209	0	0	0	0	0	0	0	0	0	0	0.0820085	0.108948	0	0	0.122306	0	0.0389501	0	0.186116	0	0	0	0.608743	0	0	0.362368	0.44305	0.787481	0	0.328461	0.8396	0.889415	0.475233	0.203072	0	0	0	0	0	0.303077	0	1.41117	0	0
FAF1	196.439	256.355	317.317	305.623	254.372	257.87	334.61	177.138	97.885	242.274	313.958	259.446	359.082	204.181	442.327	229.186	225.126	246.044	131.082	282.894	241.458	841.049	408.145	311.26	608.179	418.356	168.766	325.677	383.937	402.224	347.757	412.282	456.739	461.392	462.226	459.8	489.657	429.974	137.175	489.844	212.05	257.913	0	286.315	227.611	194.73	138.921	233.047	181.061
CDKN2C	3.62888	23.171	0	11.7814	3.10209	7.49621	4.33433	20.2971	0	7.12021	3.93677	16.0369	31.5677	4.93191	0	3.64938	0.808505	3.77976	6.51787	2.01805	4.47144	9.11432	2.37293	5.09957	1.71802	5.26235	0	3.65246	6.1104	3.01166	5.90142	2.42066	1.87946	4.57255	9.11479	1.01134	1.16308	1.06228	4.36605	0	22.321	0	0	0	18.4877	19.473	4.86068	8.52612	11.3889
C1orf185	0.11845	0.163753	0	0	0	0	0.866866	0	0	0.562121	0	0.109842	0	0	0	0.738077	0.458726	0.359977	1.44842	0.428071	0.207974	0.11685	0	0.818909	0	0	0	0.608743	0	0	0.314915	0.269857	0.199495	0.653221	0.0821152	0.539062	0.342083	0.279549	0	0	0	0	0	0	0	0	0	0	0
RNF11	65.1529	85.2333	99.1615	85.9347	24.8167	52.4735	35.5415	38.749	24.4713	55.65	83.1643	57.557	284.109	25.6459	65.5299	66.1809	87.0548	33.6579	69.5239	84.0854	52.0974	52.8942	27.2887	53.9735	27.4883	43.8529	38.946	26.7847	40.736	38.1477	39.1185	48.1313	61.6335	27.4353	40.2364	83.2588	85.5891	56.7204	50.9711	122.461	33.4815	0	117.362	26.5106	30.6108	32.455	100.35	36.9465	44.1612
TTC39A	7.65079	8.76077	0	7.62324	0	2.99848	3.46746	3.69038	24.4713	1.31162	4.42887	1.75747	7.89192	0.986382	0	0.792749	2.523	1.25992	0.724208	24.4612	0.519935	2.14225	0	2.27061	1.71802	0	6.49101	0	1.0184	1.33851	0.780816	0.95457	1.08147	1.0887	0.656922	28.3222	23.3985	0.97842	0.101536	0	0	0	0	0	0	0	5.95826	0	0.929709
EPS15	233.745	70.7412	237.988	200.976	111.675	173.912	275.663	62.7365	220.241	140.905	49.2097	210.567	252.541	132.175	221.164	128.248	106.144	176.749	97.768	111.482	193.936	418.713	218.31	128.01	190.7	299.077	97.3651	174.709	274.968	515.663	200.001	57.4394	71.3878	239.297	60.9295	86.4884	143.675	40.283	93.7179	163.281	245.531	71.6425	234.724	381.753	62.1308	64.9101	94.5482	176.206	83.209
OSBPL9	131.183	116.838	297.485	65.144	62.0418	56.9712	104.891	62.7365	122.356	141.28	123.024	78.9762	59.1894	83.8425	131.06	129.56	124.63	87.8345	85.4565	101.881	95.9799	118.447	118.647	183.51	118.543	91.214	162.275	112.009	138.502	140.544	212.559	129.528	152.918	129.773	132.041	106.419	151.269	148.049	71.2784	40.8203	189.729	128.957	0	153.762	54.5539	77.8921	91.7258	204.627	79.0253
NRD1	143.777	95.5497	158.658	114.349	71.3481	278.859	122.228	107.021	269.184	115.235	112.69	97.5394	134.163	92.7199	196.59	110.233	91.6994	98.8138	90.5259	86.2258	89.2208	223.145	182.716	170.035	194.136	533.251	103.856	160.708	160.907	121.136	141.949	118.798	139.731	153.507	147.972	189.793	196.492	133.037	77.5736	40.8203	100.445	100.3	469.448	137.855	127.292	51.928	129.671	159.154	101.106
RAB3B	42.8789	176.28	79.3292	8.31626	6.20418	10.4947	13.003	36.9038	24.4713	20.4237	73.8145	12.1924	0	0	0	4.93418	35.5972	2.69983	20.2778	20.8532	2.07974	3.31076	7.1188	46.7522	0	3.50823	6.49101	4.86994	3.0552	3.01166	15.681	91.4052	46.5979	11.3225	16.423	96.1629	308.764	30.1633	17.6673	0	0	0	0	0	2.12154	0	2.82233	51.1567	2.09185
TXNDC12	54.024	37.9906	0	22.1767	24.8167	64.4674	48.5445	84.8788	48.9425	53.2142	59.5437	64.3672	3.94596	23.6732	49.1475	28.4433	33.3093	34.9178	56.4882	33.7565	40.7629	14.6063	53.391	74.8185	85.901	37.7135	51.928	39.5683	43.7912	26.4357	58.4361	34.6747	37.7466	49.427	41.3039	42.4952	44.6076	32.3997	51.1742	40.8203	100.445	57.314	0	42.417	64.5554	64.9101	27.4393	28.4204	66.9391
KTI12	5.6856	4.74883	0	2.77209	3.10209	1.49924	1.73373	9.22596	0	5.99596	3.44468	3.62478	0	0	0	2.2689	2.61474	2.51984	6.51787	1.52883	2.49569	1.7917	8.30527	1.9356	0	1.75412	0	0.608743	1.0184	1.33851	1.40202	1.39359	1.49096	0.870961	1.56019	1.94158	1.43675	1.70525	3.14762	0	0	28.657	0	0	1.21231	0	2.82233	2.84204	6.04311
BTF3L4	49.4798	52.4827	0	29.1069	27.9188	29.9848	43.3433	23.9875	73.4138	35.0389	46.7492	25.2636	15.7838	38.4689	32.765	35.6054	41.3255	34.9178	34.0378	50.3901	30.5722	64.8129	58.1369	50.1395	53.2586	33.3282	32.455	67.5704	35.644	29.1127	48.8765	48.5542	68.8784	45.5077	56.0026	78.9844	82.1683	50.6263	27.4148	40.8203	11.1605	42.9855	0	58.3234	35.7631	32.455	51.8996	25.5784	24.8697
ZFYVE9	69.3255	65.5011	59.4969	9.00928	18.6126	0	3.46746	60.8913	122.356	90.8763	78.7354	59.3145	3.94596	15.7821	32.765	114.265	114.303	4.31973	73.145	97.9671	84.6454	42.0661	34.4075	87.7349	22.3343	14.91	110.347	1.21749	97.7664	119.462	126.889	114.109	165.928	38.9755	138.528	200.068	219.891	155.429	54.6265	40.8203	122.766	28.657	0	0	66.3739	84.3831	50.9588	56.8408	84.1387
CC2D1B	17.7998	14.4102	0	3.46511	9.30628	11.9939	16.4705	5.53558	24.4713	12.1793	11.8103	12.7416	3.94596	8.87744	8.19124	9.06194	11.4452	6.83957	14.4842	10.2737	10.5027	3.19391	8.30527	13.3259	15.4622	6.1394	25.964	13.3923	4.0736	19.0738	8.09719	8.31725	8.89329	7.18543	6.15864	17.3645	17.5146	7.12849	10.3567	0	11.1605	0	0	0	11.5169	25.964	24.7738	5.68408	8.13496
ORC1	1.87905	3.76631	0	22.1767	6.20418	5.99697	5.2012	1.84519	0	2.43586	1.96839	2.41652	39.4596	21.7004	0	3.67672	6.37056	3.05981	5.06945	3.97495	3.32758	52.6995	26.1023	4.13177	17.1802	10.5247	0	3.65246	2.0368	4.35017	6.93244	2.25553	1.33347	3.2661	4.10576	1.76984	1.36833	0.950465	3.14762	0	0	14.3285	0	5.30213	8.18308	0	1.41117	2.84204	3.71884
PRPF38A	20.7611	54.1203	19.8323	24.2558	27.9188	43.478	11.2693	42.4394	48.9425	24.9207	33.4626	25.1537	27.6217	30.5779	16.3825	30.7942	33.94	20.1587	34.762	24.0943	29.3243	26.2913	17.797	19.5794	25.7703	10.5247	12.982	14.6098	15.276	16.7314	40.9691	29.495	31.0688	11.758	30.4647	31.652	32.8399	32.9588	51.1742	40.8203	66.963	14.3285	0	15.9064	45.1585	38.946	35.7496	31.2624	26.7291
ZCCHC11	192.756	181.684	237.988	53.3627	179.921	82.4583	140.432	186.364	318.126	164.327	213.57	147.847	19.7298	193.331	65.5299	183.617	211.37	153.71	125.288	123.101	151.925	65.2803	218.31	246.008	286.909	136.821	331.041	132.097	208.772	172.334	282.418	268.367	315.098	176.805	251.19	326.142	295.081	344.572	96.1547	40.8203	33.4815	243.585	469.448	153.762	168.814	220.694	288.035	173.364	175.947
GPX7	22.7262	24.2354	0	10.3953	15.5105	41.9788	4.33433	35.0586	48.9425	41.0349	31.0021	41.5202	7.89192	14.7957	32.765	21.6913	15.7687	11.8793	64.4545	6.42107	14.5582	2.29805	14.2376	19.8027	6.87208	9.64763	0	3.04371	17.3128	5.68869	19.7577	8.74822	8.74629	10.887	14.6165	17.1307	15.0516	6.70917	23.6579	40.8203	0	0	0	5.30213	40.0062	58.4191	144.409	17.0522	79.2577
FAM159A	0.495336	1.7194	0	0	31.0209	0	2.6006	1.84519	0	0.749495	13.7787	3.18541	0	69.0468	0	2.24157	3.30856	3.77976	2.17262	1.9569	1.87176	0.350551	2.37293	4.65289	29.2063	0.877058	0	0	2.0368	1.33851	3.60211	3.20204	5.19738	13.9354	1.47807	7.76153	8.41523	2.62776	0.406145	0	0	0	0	0	0	6.49101	14.5821	0	3.95126
SELRC1	2.60052	3.76631	0	5.54417	0	4.49773	1.73373	0	0	2.81061	0	1.42794	0	0	0	2.05021	2.53446	1.43991	3.62104	2.50727	1.76778	4.01186	4.74587	2.49395	0	1.75412	0	2.43497	0	1.67314	1.7385	2.06219	2.89793	2.1774	1.72442	6.1682	7.59424	1.48161	1.72611	0	0	0	0	0	1.21231	0	3.76311	5.68408	2.32427
ZYG11B	71.0054	120.358	59.4969	29.7999	34.123	44.9773	65.8818	66.4269	122.356	81.3202	83.6564	65.3558	11.8379	33.537	73.7212	75.8579	69.348	45.3571	109.355	74.6067	68.7354	58.1135	52.2045	103.555	56.6947	73.6728	71.4011	80.354	96.748	107.416	105.833	154.25	165.56	69.0237	116.357	167.495	191.84	158.672	91.6871	81.6407	89.284	14.3285	0	58.3234	85.4677	103.856	159.775	79.5771	75.5389
ZYG11A	0.50072	0.409382	0	0	0	0	0.866866	0	0	0.562121	0	0.219683	0	0	0	1.09345	1.33604	0.899943	1.44842	1.16191	2.3917	0.740051	0	10.4225	0	0.877058	0	1.21749	1.0184	0.669257	0.591004	2.9926	3.01343	0.21774	0.492691	5.62437	2.32616	0.866601	0.304608	0	0	0	0	0	0.303077	0	0.470389	0	0.929709
ECHDC2	105.022	4.91258	237.988	10.3953	43.4293	31.4841	30.3403	7.38077	195.77	26.6071	56.099	15.4877	7.89192	38.4689	16.3825	82.6509	83.7004	29.5181	45.6251	100.046	34.0037	11.1397	65.2557	275.6	36.0784	42.0988	103.856	48.6994	28.5152	5.35406	7.43717	82.2139	22.5115	67.064	9.11479	45.5912	50.9703	10.5669	4.46759	0	44.642	0	0	31.8128	40.0062	12.982	78.2413	5.68408	6.50796
SCP2	68.0603	37.6631	39.6646	30.493	80.6544	73.4629	80.6185	94.1048	48.9425	69.7031	59.5437	57.7767	15.7838	41.4281	40.9562	51.515	30.2243	41.2174	68.0755	64.0884	46.0662	18.8518	47.4587	194.044	32.6424	49.1152	45.437	86.4415	69.2512	39.8208	63.1124	70.7752	55.1027	78.6042	70.2085	60.2127	76.6265	41.485	93.1087	0	100.445	71.6425	0	90.1362	43.9462	84.3831	58.0146	42.6306	54.1556
PODN	0.177675	0.163753	0	0	0	0	0	0	0	18.3626	0	0.219683	0	0	0	2.89763	0.498865	0	34.0378	0.244612	0.935882	0.350551	0	1.60059	0	0	12.982	0	28.5152	0	1.84635	24.4201	7.78032	0	0.739037	0.663093	0.547332	0.726826	8.4275	0	0	0	0	0	11.5169	0	1.41117	2.84204	19.5239
SLC1A7	0.183059	0.573135	0	0.693022	0	1.49924	0.866866	0	0	0.374748	0	0.329525	0	0	0	0.300698	0.286704	0	1.44842	0.122306	0	0.2337	0	1.48892	0	0.877058	0	0.608743	10.184	0.334629	0.172556	0.620269	0.293993	0	0.16423	0.305309	0.273666	0.279549	0.304608	0	0	0	0	0	0.606154	0	0.470389	0	0
CPT2	27.9488	12.5271	19.8323	11.0883	18.6126	23.9879	15.6036	22.1423	24.4713	19.1121	18.6997	12.6318	7.89192	8.87744	16.3825	7.95483	12.5232	13.4991	16.6568	20.4863	8.7349	8.10162	14.2376	37.5954	5.15406	10.5247	0	9.73988	10.184	7.36183	9.86589	5.57437	4.0844	10.0161	8.1294	3.02447	4.10499	4.24914	11.372	0	0	0	0	15.9064	6.97077	12.982	19.2859	2.84204	7.90253
C1orf123	16.863	24.2354	0	13.1674	9.30628	17.9909	13.8699	25.8327	24.4713	22.4849	15.7471	20.4306	0	16.7685	73.7212	11.2488	10.8603	9.17942	31.1409	8.74488	11.8545	9.85437	13.0511	15.9315	1.71802	11.4017	38.946	15.2186	11.2024	8.70035	10.9918	7.65267	7.80132	3.2661	7.88306	8.04299	9.78356	5.92643	17.9719	0	55.8025	14.3285	117.362	15.9064	22.7308	12.982	33.084	11.3682	24.8697
MAGOH	16.9707	15.229	0	20.0976	6.20418	17.9909	18.2042	20.2971	24.4713	16.8636	14.7629	18.2337	15.7838	33.537	49.1475	26.3521	29.3642	16.379	15.2084	21.8928	26.2047	27.6546	21.3564	22.6689	20.6162	17.5412	12.982	11.5661	14.2576	15.3929	16.6775	13.4365	16.1066	12.8467	12.8921	20.7372	19.225	14.5645	12.2859	0	0	42.9855	0	5.30213	24.2462	12.982	16.934	14.2102	15.1078
LRP8	4.87799	28.7386	59.4969	2.77209	15.5105	64.4674	5.2012	1.84519	24.4713	3.93485	11.8103	4.39367	0	19.7276	16.3825	7.3671	14.3811	12.0592	6.51787	6.1153	13.2063	8.76377	51.0181	1.71226	34.3604	74.5499	97.3651	7.30491	1.0184	3.68092	87.3694	110.976	111.77	6.53221	52.4716	139.531	129.102	272.923	200.94	0	0	14.3285	0	0	5.45539	0	8.15341	0	9.52952
GLIS1	0.909911	1.14627	0	0.693022	0	1.49924	0.866866	0	0	1.31162	0.492097	1.20826	0	0	0	33.9105	10.998	1.07993	3.62104	5.80954	1.35183	0.934802	1.18647	1.30281	0	0	0	0.608743	6.1104	0	1.10004	5.93284	9.08229	0	0.739037	5.19503	3.35241	36.7047	0.609217	0	11.1605	0	0	0	0.303077	0	0	0	0
NDC1	27.9919	23.6623	0	70.6882	37.2251	59.9697	16.4705	36.9038	73.4138	29.9798	11.3182	27.3506	55.2434	30.5779	24.5737	26.6391	39.611	27.7183	18.8294	42.1344	30.9881	137.104	97.2903	22.855	101.363	54.3776	58.4191	40.7858	32.5888	30.1166	51.4735	28.4518	35.2687	39.411	41.7966	60.9807	54.2543	33.0706	19.698	0	22.321	28.657	0	26.5106	46.0677	32.455	13.9549	19.8943	30.6804
YIPF1	19.3127	13.1821	19.8323	11.7814	18.6126	20.9894	30.3403	18.4519	73.4138	11.9919	6.88935	10.6546	0	10.8502	16.3825	9.07561	9.98877	13.4991	7.24208	11.0687	8.83889	10.4776	13.0511	13.4748	13.7442	4.38529	6.49101	23.741	8.1472	9.70423	19.7102	10.025	15.8021	21.1208	17.4084	16.6966	22.6459	9.44874	11.7782	0	33.4815	0	0	10.6043	7.88	12.982	6.42865	5.68408	10.4592
DIO1	0.61917	0.245629	0	0	3.10209	0	0.866866	0	0	0.187374	0	0.109842	0	0	0	0.533055	0.860112	1.25992	0.724208	0.183459	0.311961	2.76546	0	97.3757	1.71802	0.877058	6.49101	2.43497	4.0736	3.01166	0.405507	0.338329	0.188996	0.435481	0.16423	0.505668	0.615749	0.363413	0.406145	0	0	0	0	0	0	0	0.470389	0	0.232427
HSPB11	40.7199	29.803	59.4969	22.8697	37.2251	52.4735	35.5415	22.1423	0	33.5399	28.0495	22.5175	15.7838	36.4961	16.3825	26.3521	21.1588	19.2588	14.4842	17.184	10.9186	40.9365	36.7805	35.4364	70.4388	42.9758	38.946	37.1333	37.6808	24.4279	47.3106	21.6893	19.372	30.7014	24.7167	37.2048	42.0762	22.308	13.5043	0	22.321	57.314	0	42.417	28.7923	6.49101	15.0524	22.7363	20.686
LRRC42	16.6799	16.7028	0	9.00928	6.20418	8.99545	3.46746	12.9163	24.4713	11.9919	26.0811	6.70034	0	2.95915	0	5.50824	7.4371	0.899943	12.3115	7.21606	3.53556	7.71211	5.93233	9.86413	3.43604	3.50823	6.49101	10.9574	6.1104	6.69257	11.9064	7.93462	5.70137	4.35481	5.17326	10.9053	8.00473	8.69396	6.70139	0	22.321	14.3285	0	10.6043	12.4262	6.49101	9.40778	14.2102	13.4808
LDLRAD1	4.08114	0.409382	0	0	0	0	0	0	0	0	1.47629	0.219683	0	0	0	0.205021	0.321109	0.539966	0	0.856142	0.207974	0	0	0.0744462	0	0	0	0	0	0	0.211381	0.209442	0.209995	0.435481	0.16423	0.329161	0.136833	0.223639	0	0	0	0	0	0	0	0	0	0	0
TMEM59	118.891	110.206	59.4969	139.297	80.6544	73.4629	88.4203	140.235	97.885	101.369	184.536	109.842	71.0273	33.537	32.765	62.4085	45.2763	27.5383	76.0418	51.3685	51.0576	78.0949	62.8827	86.6182	61.8487	54.3776	110.347	54.1781	82.4904	50.1943	65.2607	56.231	70.6003	57.2657	100.591	49.1023	70.1954	65.4423	78.3859	40.8203	122.766	14.3285	0	58.3234	68.1923	149.293	52.9971	68.2089	127.835
TCEANC2	11.5327	9.49766	19.8323	11.7814	15.5105	5.99697	9.53553	5.53558	24.4713	14.053	8.36564	13.0712	31.5677	11.8366	8.19124	11.0438	10.1436	12.5992	13.7599	9.90679	17.0539	18.2286	35.594	13.9214	36.0784	5.26235	6.49101	20.0885	20.368	14.7237	15.3532	8.21656	8.18981	11.5402	14.288	16.73	17.5146	7.24031	14.8243	0	22.321	0	0	5.30213	11.82	6.49101	7.83981	14.2102	12.3186
AL161915.1	0.845302	0.982516	0	0.693022	0	0	0	1.84519	0	1.31162	0	0.768892	0	0	0	0.751745	0.481663	0.899943	1.44842	0.122306	1.24784	0.506351	2.37293	0.707239	1.71802	0	0	0.608743	1.0184	1.00389	0.556493	0.334301	0.346492	0.21774	0.656922	0.949321	0.957831	0.447278	1.31997	0	0	0	0	0	1.21231	0	2.19515	0	0.697282
RP11-446E24.4	0.920679	0.327505	0	0.693022	0	0	0	1.84519	0	1.12424	1.96839	2.85588	0	0	0	0.956766	0.762633	0.899943	0.724208	1.0396	12.0625	1.67485	1.18647	0.670016	5.15406	1.75412	6.49101	0.608743	2.0368	10.0389	1.52281	2.67441	1.23897	0.870961	2.46346	4.64642	2.66824	2.06866	0.507681	0	22.321	0	0	0	0.909231	0	1.25437	0	0.697282
AL357673.1	3.59119	4.33945	0	4.85115	0	2.99848	0.866866	3.69038	0	2.06111	5.41306	2.85588	7.89192	4.93191	0	2.5286	1.99546	1.6199	3.62104	1.22306	9.46281	5.88146	4.74587	2.27061	1.71802	2.63117	6.49101	1.82623	2.0368	5.68869	3.11032	1.43387	1.22847	1.74192	2.29923	0.858682	1.09466	0.950465	2.74148	0	0	0	0	0	3.94	0	5.17428	5.68408	3.95126
CYB5RL	6.22939	4.09382	0	2.77209	3.10209	4.49773	10.4024	5.53558	0	4.12222	6.88935	4.39367	7.89192	0	0	5.34422	4.16868	6.65958	4.34525	3.60803	16.5339	16.0085	10.6782	5.84403	8.5901	7.01646	0	9.13114	10.184	15.3929	7.18265	2.93218	2.51994	6.53221	5.00903	2.74301	3.14716	2.46003	3.35069	0	11.1605	14.3285	0	0	7.57692	0	5.48787	14.2102	6.04311
MRPL37	30.1563	24.1535	0	43.6604	21.7146	25.4871	26.006	18.4519	24.4713	20.049	19.6839	17.9042	67.0813	28.6051	0	12.7933	17.2538	14.3991	24.6231	18.774	15.598	30.2253	20.1699	28.9224	15.4622	30.697	12.982	10.3486	12.2208	12.3813	14.3049	13.0176	14.4057	8.49187	12.0709	19.7115	19.7724	12.1604	19.0888	40.8203	22.321	0	0	10.6043	30.9139	6.49101	38.2583	5.68408	14.4105
SSBP3	165.146	297.211	99.1615	255.725	136.492	152.923	84.9529	142.08	244.713	200.303	383.835	126.318	331.461	211.086	81.9124	310.771	247.082	92.5142	174.534	133.13	171.058	489.992	275.26	129.313	228.497	181.551	285.604	146.098	208.772	237.586	134.387	305.769	300.692	62.7092	150.928	151.166	210.586	464.945	76.7613	122.461	212.05	171.942	234.724	79.5319	62.7369	110.347	150.681	113.682	143.175
ACOT11	6.59551	17.3578	0	0	0	13.4932	22.5385	9.22596	0	28.4808	97.9272	13.181	7.89192	5.91829	0	23.5364	31.4629	15.839	29.6925	49.2282	9.77477	3.27181	116.274	10.9436	5.15406	35.0823	136.311	45.047	17.3128	105.743	36.8191	5.13938	2.07895	38.9755	8.04729	11.6065	12.4518	4.69642	1.92919	0	0	0	0	5.30213	20.9123	6.49101	60.9937	22.7363	22.7779
FAM151A	0.366118	0.818764	0	0	0	0	0	0	0	1.68636	0	0.219683	0	0	0	0.314366	0.928921	0.539966	1.44842	0.61153	0.935882	1.2464	2.37293	60.5248	0	1.75412	0	4.2612	0	1.00389	0.60826	0.161109	0.262494	0	0.574806	0.357784	0.342083	0.223639	0.203072	0	0	0	0	0	1.21231	0	0.627185	0	0
MROH7-TTC4	6.16478	4.01194	39.6646	0.693022	0	1.49924	6.06806	0	0	6.37071	10.8261	4.28383	0	2.95915	0	4.78383	5.49898	2.15986	10.8631	4.0361	3.74353	7.36156	11.8647	14.182	3.43604	2.63117	12.982	10.9574	9.1656	9.70423	8.55878	4.05189	4.93488	5.87899	4.26999	7.74722	9.71515	3.99755	1.72611	0	0	0	0	0	3.03077	0	5.17428	2.84204	2.5567
MROH7	2.20209	11.1352	0	1.38604	0	8.99545	11.2693	3.69038	24.4713	15.3647	57.0832	4.94288	0	2.95915	0	14.8709	20.098	6.11961	26.7957	27.3966	4.57542	1.59695	88.985	45.1889	1.71802	8.77058	71.4011	32.8721	3.0552	66.2565	19.3349	2.04206	0.986977	17.4192	1.47807	6.85992	6.6364	1.59343	0.710753	0	22.321	0	0	0	10.6077	0	31.5161	0	12.5511
TTC4	8.20535	6.30448	0	3.46511	0	5.99697	6.06806	5.53558	0	8.99394	11.3182	4.61335	0	1.97276	40.9562	5.1802	4.77076	1.07993	7.24208	4.0361	4.7834	11.5292	20.1699	11.1669	10.3081	7.01646	0	10.9574	12.2208	9.70423	10.3016	7.16129	9.14528	6.53221	8.45787	12.6226	13.2728	7.24031	3.85837	0	0	0	0	5.30213	7.27385	0	6.42865	0	6.74039
PARS2	4.19959	2.45629	0	2.07907	0	4.49773	2.6006	5.53558	0	1.31162	0.984193	2.74604	0	0	0	1.02511	1.96679	0.179989	0.724208	1.52883	1.03987	1.28535	0	3.0523	0	0	6.49101	0	3.0552	0.334629	2.03616	1.16804	1.41747	0.435481	1.0675	2.00836	1.77883	1.09024	1.52304	0	0	0	0	0	3.33385	0	4.2335	5.68408	1.39456
TTC22	0.888375	5.40384	0	0.693022	9.30628	1.49924	0	0	0	0.749495	30.0179	0	0	1.97276	0	0.765413	2.75236	0.539966	0	6.78798	0.831895	0.506351	0	10.5341	3.43604	0.877058	0	0	0	0	0.595318	0.422911	0.388491	0.21774	0.410576	0.62493	0.547332	0.475233	0	0	0	0	0	0	0	0	0	0	0
C1orf177	0.215364	0.245629	0	0	0	0	0	0	0	0	0	0	0	0	0	0.164017	0.475929	0.179989	0	0.183459	0	0.0389501	0	1.30281	0	1.75412	0	0	0	0	0.211381	0.173192	0.167996	0	0.246346	0.262375	0.0684165	0.139774	0.101536	0	0	0	0	0	0	0	0	0	0
DHCR24	3442.45	635.524	654.466	863.505	970.955	610.191	1040.24	1321.16	1370.39	1017.63	526.543	749.889	3.94596	5.91829	0	5.1802	15.9924	2.69983	43.4525	30.2707	11.0226	46.9348	34.4075	925.516	29.2063	59.6399	142.802	60.2655	52.9568	81.6494	79.4621	57.0446	24.0759	9.36283	94.6788	37.3622	50.9019	17.2761	20.8149	40.8203	33.4815	14.3285	0	21.2085	44.2492	168.766	80.5933	73.893	66.0094
TMEM61	1.75521	0.409382	0	0	3.10209	0	0	0	0	0.374748	0.492097	0.219683	0	0	0	0.0136681	0.229363	0	2.89683	0	0	0	0	0	0	0	0	0	0	0	0.202753	1.52651	0.472489	0	0.0821152	1.0972	3.42083	1.87298	0.203072	0	0	0	0	0	0.303077	0	0.156796	0	0
BSND	0.979904	0.163753	0	0.693022	0	0	1.73373	0	0	0	0	0.329525	0	0	0	0.0683404	0.510333	0	0	0	0.311961	0.0389501	0	0.297785	0	0	0	0	2.0368	0	0.043139	0.44305	0.0209995	0	0.0821152	0.0477046	0.0684165	0.139774	0.101536	0	0	0	0	0	0	0	0	0	0
PCSK9	0.457648	0.409382	0	0	0	1.49924	0	0	0	1.68636	0	0.109842	0	0	0	0.533055	0.756899	0.179989	9.4147	0.672683	0	2.4149	0	59.5198	3.43604	2.63117	0	3.04371	4.0736	0.669257	1.97145	78.6292	1.98445	0	1.72442	2.6476	2.25775	18.562	2.33533	0	0	0	0	0	2.12154	0	10.6621	0	3.71884
USP24	94.9323	100.708	79.3292	356.213	108.573	178.41	128.296	60.8913	48.9425	82.2571	87.1011	68.9806	335.407	110.475	90.1037	71.2791	97.336	81.3549	57.9366	91.3626	74.1427	483.916	251.531	126.261	219.907	280.658	58.4191	159.491	138.502	96.3731	145.051	418.553	165.298	152.636	437.756	281.934	216.402	223.136	55.4387	326.563	55.8025	85.971	234.724	116.647	74.86	64.9101	90.9418	79.5771	86.9278
PPAP2B	105.56	19.896	257.82	14.5535	24.8167	53.9727	61.5475	143.925	97.885	194.869	12.3024	2223.42	23.6758	3.94553	221.164	48.016	52.9428	9.17942	488.84	51.2462	1211.45	11.2176	17.797	166.09	8.5901	49.9923	103.856	77.3103	115.079	2210.22	453.874	8.84891	13.8702	8.49187	172.935	18.0991	10.1941	9.00147	27.4148	0	145.087	0	117.362	58.3234	71.5262	97.3651	150.524	56.8408	622.673
PRKAA2	21.601	15.1471	19.8323	0.693022	0	2.99848	4.33433	36.9038	0	16.3015	24.1127	5.49208	0	0	0	1.47615	43.5618	0.899943	3.62104	42.379	4.7834	1.44115	0	40.871	1.71802	1.75412	58.4191	1.82623	6.1104	14.0544	59.355	32.5641	20.191	2.39514	62.8181	158.808	219.343	35.6984	5.38142	0	33.4815	0	0	0	19.3969	0	331.311	2.84204	16.5023
C1orf168	2.59513	1.7194	0	1.38604	0	5.99697	0	0	0	1.31162	2.46048	1.75747	0	1.97276	0	2.47392	2.46565	1.25992	2.17262	9.41756	3.53556	4.20661	2.37293	206.514	1.71802	3.50823	116.838	1.82623	6.1104	4.35017	3.00248	2.18303	2.78243	1.52418	2.05288	5.90105	3.42083	1.92889	1.21843	0	0	0	0	0	2.42462	0	2.82233	2.84204	1.62699
C8A	0.506104	0.409382	0	0.693022	0	1.49924	0	0	0	0.374748	0	0.329525	0	0	0	0.136681	0.137618	0	0.724208	0.428071	0.103987	3.81711	0	202.605	1.71802	1.75412	0	6.08743	6.1104	3.01166	0.107848	0.0926376	0.115497	0	0.16423	0.195589	0.0684165	0.0838646	0.203072	0	0	0	0	0	0.303077	0	0.156796	0	0
C8B	0.290741	0.163753	0	0	0	0	0	0	0	0	0	0.109842	0	0	0	0.0820085	0.0745431	0.179989	0	0.061153	0	2.2591	1.18647	140.108	1.71802	1.75412	6.49101	4.2612	1.0184	2.67703	0.211381	0.0765267	0.125997	0	0.0821152	1.20215	0.0684165	0.0838646	0.101536	0	0	0	0	0	0.909231	0	0	0	0.232427
DAB1	71.2046	66.6474	0	27.7209	71.3481	26.9864	34.6746	245.411	122.356	50.2162	241.619	18.2337	15.7838	43.4008	24.5737	34.4846	352.09	12.5992	31.8651	124.752	22.0452	35.9899	78.3068	460.897	67.0028	23.6806	331.041	57.8306	70.2696	32.1244	692.907	545.897	1833.37	317.248	1035.06	13982.7	152.5	1331.13	189.67	40.8203	11.1605	71.6425	0	21.2085	45.4615	103.856	93.137	34.1045	59.5014
OMA1	55.1708	20.551	39.6646	33.9581	74.4502	32.9833	32.9409	29.5231	48.9425	32.0409	33.9547	20.3207	23.6758	48.3327	16.3825	23.0991	28.9456	23.0385	21.7262	47.8217	21.6293	70.0712	99.6632	53.0057	73.8749	45.607	51.928	80.9628	46.8464	24.4279	49.7565	22.4344	36.9171	70.7656	55.8383	30.7694	43.5813	29.3526	14.3166	0	33.4815	28.657	0	37.1149	32.7323	32.455	41.8646	17.0522	34.6317
TACSTD2	0.14537	0.0818764	39.6646	0	0	0	0.866866	0	0	0	0	0.219683	0	1.97276	0	0.546723	1.86931	0.719955	2.89683	148.296	0.623922	0.0779001	0	0.260562	0	0	6.49101	0	0	0	0.0560807	0.0241663	0.0629985	0	0	0.262375	0.0684165	0	0	0	0	0	0	5.30213	0	0	0.940778	0	0.232427
MYSM1	50.562	40.365	59.4969	40.8883	40.3272	35.9818	57.2132	29.5231	48.9425	49.0919	65.4488	67.333	11.8379	51.2919	81.9124	37.0405	42.5182	32.5779	39.1072	51.8578	53.4493	62.398	66.4421	42.6205	49.8226	40.3446	19.473	57.2218	68.2328	91.019	51.8013	49.1664	49.5588	55.9593	58.3018	36.4701	54.8701	48.1103	43.7621	0	100.445	71.6425	0	47.7192	29.7015	19.473	30.7321	42.6306	38.1181
JUN	91.7987	155.729	138.826	14.5535	43.4293	19.4901	73.6836	302.611	24.4713	306.731	170.265	127.307	47.3515	364.961	114.677	378.538	386.792	298.961	1034.89	627.063	351.684	6.34886	5.93233	38.042	8.5901	7.01646	532.262	18.871	176.183	120.132	50.8436	38.501	31.4783	80.5639	37.1982	17.1021	23.3985	24.2928	300.141	40.8203	78.1235	42.9855	0	42.417	40.6123	233.676	285.683	244.415	232.66
FGGY	92.181	15.6384	59.4969	12.4744	34.123	25.4871	43.3433	29.5231	24.4713	32.9778	42.3203	25.703	15.7838	22.6868	8.19124	19.6547	62.123	25.5584	21.7262	84.6969	30.4682	27.9662	59.3233	171.375	39.5145	39.4676	25.964	51.7431	40.736	42.4978	31.7374	31.6378	28.6118	68.8059	30.8753	18.9578	50.9703	22.6993	10.9659	0	33.4815	14.3285	117.362	21.2085	25.1554	19.473	49.3908	14.2102	18.3618
HOOK1	11.4143	12.4452	0	17.3255	24.8167	5.99697	0	9.22596	24.4713	3.93485	43.3045	1.64763	15.7838	11.8366	16.3825	0.601396	27.9708	0.719955	2.17262	42.2567	1.03987	31.6275	11.8647	69.9795	8.5901	9.64763	45.437	6.08743	3.0552	5.01943	2.06204	16.5177	28.1288	2.39514	1.97076	53.0761	41.7341	17.7793	2.5384	0	0	14.3285	0	0	0.303077	12.982	6.58544	0	0.929709
CYP2J2	1.02836	0.327505	39.6646	0	0	0	1.73373	9.22596	0	0.562121	1.47629	0.329525	0	0	0	0.259694	0.2523	0	2.17262	8.68373	0.103987	3.62236	3.5594	73.3296	3.43604	2.63117	0	3.65246	4.0736	1.67314	0.875722	0.165137	0.0944978	0	8.53998	0.477046	0.0684165	0.139774	0.304608	0	0	0	0	0	1.51538	0	124.026	0	0.929709
C1orf87	0.11845	0	0	0	0	0	0	0	0	0	0	0.109842	0	0	0	0.218689	0.200693	1.25992	0	1.89574	0.103987	0.11685	0	0.297785	0	0	0	0	0	0.334629	0.159614	0.165137	0.188996	0	0	0.171736	0.342083	0.167729	0	0	0	0	0	0	0.606154	0	1.72476	0	0.697282
NFIA	224.393	18.6678	138.826	455.315	43.4293	19.4901	169.039	524.034	367.069	1087.14	107.277	370.716	402.488	6.90468	245.737	669.272	27.3974	52.9167	1092.83	276.473	598.757	1474.77	147.122	365.233	96.2091	53.5005	1330.66	339.678	951.186	518.005	2456.34	2258.14	1805.03	312.675	998.275	40.7683	37.6291	1026.47	581.193	693.946	580.346	28.657	0	153.762	995.608	538.753	351.38	451.884	1085.2
TM2D1	50.1797	40.9382	0	39.5022	43.4293	41.9788	37.2752	51.6654	0	62.7702	68.4014	47.891	27.6217	28.6051	0	39.1181	35.3506	21.9586	58.6608	39.566	37.5393	64.5013	47.4587	51.889	53.2586	49.9923	71.4011	59.048	63.1408	44.5056	52.5692	45.038	51.0078	39.6287	56.6595	68.0219	72.4531	47.8308	25.5871	0	55.8025	14.3285	117.362	37.1149	40.6123	12.982	36.8471	68.2089	70.6579
INADL	62.9562	57.8047	79.3292	6.2372	40.3272	4.49773	7.80179	33.2135	220.241	81.1329	320.355	16.8058	31.5677	38.4689	16.3825	25.327	249.501	9.5394	52.8672	641.74	25.2688	9.81542	49.8316	375.581	68.7208	7.89352	227.185	22.5235	20.368	15.7275	45.6022	199.203	306.257	11.9757	36.7055	316.959	613.628	291.821	11.9813	0	11.1605	57.314	0	10.6043	37.2785	19.473	37.3175	11.3682	19.2915
L1TD1	0.285357	0.245629	178.491	0.693022	3.10209	0	0	1.84519	0	8.99394	0	0.329525	0	0	0	17.2491	0.613547	1.6199	8.69049	26.7239	1.5598	0.389501	1.18647	3.12674	1.71802	0.877058	0	0.608743	1.0184	0.334629	0.202753	0.326246	0.367491	0	0.16423	0.634471	1.50516	0.447278	3.6553	0	0	0	0	0	0.303077	32.455	0.783981	25.5784	4.41612
KANK4	0.85607	1.3919	198.323	0.693022	0	0	0	18.4519	0	29.4177	0.492097	25.1537	3.94596	1.97276	0	106.693	4.50125	1.07993	37.6588	131.662	36.3954	2.22015	2.37293	121.496	1.71802	1.75412	162.275	1.82623	4.0736	2.67703	1.04828	5.41729	1.02898	1.0887	0.903267	1.8414	2.66824	1.39774	52.3927	0	0	0	0	0	93.0446	266.131	10.8189	22.7363	15.8051
USP1	18.6936	65.9105	59.4969	61.6789	43.4293	49.475	19.0711	84.8788	24.4713	37.4748	38.8756	41.3005	90.7571	78.9106	57.3387	32.489	55.1275	40.4974	50.6945	45.2532	41.0748	64.6182	41.5263	24.1578	53.2586	19.2953	45.437	27.3934	14.2576	13.7198	46.0293	36.3945	31.4573	16.5483	37.2803	26.4283	23.1248	39.5002	42.7467	0	44.642	14.3285	0	31.8128	97.5908	51.928	58.1714	31.2624	50.9016
DOCK7	58.1428	112.007	39.6646	36.0371	27.9188	55.4719	151.702	101.486	97.885	182.127	116.627	113.466	39.4596	10.8502	49.1475	123.56	120.14	99.3537	97.0438	153.8	115.841	93.0128	102.036	129.871	67.0028	86.8287	155.784	168.013	163.962	144.894	222.067	253.054	250.587	121.499	71.0296	317.813	278.113	280.779	43.1529	0	66.963	42.9855	117.362	180.272	95.1662	64.9101	59.8962	113.682	135.04
ANGPTL3	1.32449	0.491258	0	2.07907	0	0	0	0	0	1.68636	1.47629	1.20826	0	0	0	0.123013	0.332577	0.359977	0	0.489224	0.103987	13.9052	4.74587	378.038	13.7442	10.5247	19.473	16.4361	22.4048	7.0272	0.62983	0.857905	0.881979	0.870961	0.16423	1.53609	1.16308	1.28592	0	0	0	0	0	0	0.303077	0	0.940778	0	1.16214
ATG4C	15.2424	16.2934	39.6646	22.1767	21.7146	34.4826	106.625	25.8327	48.9425	34.102	18.6997	33.282	27.6217	10.8502	32.765	22.771	21.692	79.375	13.7599	20.1805	21.9412	56.2829	47.4587	23.7856	58.4127	49.9923	38.946	70.0054	28.5152	33.7975	42.63	44.752	49.1598	73.1607	56.331	58.4285	81.6893	45.5664	21.7287	0	22.321	85.971	0	106.043	23.9431	12.982	11.6029	34.1045	29.0534
ALG6	14.7901	10.6439	59.4969	19.4046	21.7146	17.9909	10.4024	23.9875	24.4713	16.8636	10.334	16.9156	7.89192	11.8366	0	9.8957	13.2801	6.83957	12.3115	13.4537	16.118	40.586	18.9835	14.3309	36.0784	14.0329	19.473	18.2623	12.2208	18.4046	17.7517	28.4317	27.1314	15.895	25.2915	47.2609	63.1485	29.2967	11.372	122.461	44.642	14.3285	0	15.9064	14.8508	12.982	23.833	17.0522	18.5942
ITGB3BP	48.7529	33.7331	19.8323	39.5022	40.3272	40.4795	28.6066	31.3683	24.4713	40.8475	40.3519	35.2592	98.649	28.6051	0	37.8469	53.7742	22.6786	32.5893	35.2241	43.8825	146.063	90.1715	33.9103	130.57	66.6564	25.964	48.0907	46.8464	38.1477	78.5863	40.9378	39.8046	49.2093	65.3637	59.9933	60.8223	40.3109	17.0581	0	22.321	14.3285	0	26.5106	57.8877	32.455	31.3593	53.9987	42.5342
EFCAB7	19.3127	24.7267	0	7.62324	3.10209	2.99848	6.93493	16.6067	24.4713	13.6783	24.1127	10.3251	0	5.91829	16.3825	14.2968	19.0888	4.13974	7.96628	14.4321	11.7505	12.464	14.2376	9.4919	12.0261	7.01646	19.473	7.30491	13.2392	14.389	55.8003	30.0831	55.5122	12.1935	44.3422	82.2427	59.7961	57.9784	9.23979	40.8203	22.321	28.657	0	5.30213	19.3969	25.964	14.8956	11.3682	14.8753
DLEU2L	0.613786	0.655011	0	0	0	0	0.866866	0	0	0.562121	0.492097	0.219683	0	0	0	0.57406	0.825708	0.359977	0	0.733836	0.207974	0.311601	0	0.372231	0	0	0	0	0	0.669257	3.23543	1.88497	3.14993	1.30644	1.47807	6.64525	3.42083	2.71162	0.710753	0	0	0	0	0	0.606154	6.49101	0.940778	0	0.929709
PGM1	50.7558	20.4691	59.4969	6.93022	31.0209	29.9848	20.8048	23.9875	24.4713	32.2283	23.6206	8.56765	0	12.823	16.3825	22.4293	10.0805	5.57965	51.4187	9.90679	10.2947	2.14225	11.8647	72.1384	5.15406	15.787	129.82	7.30491	17.3128	8.36572	14.5422	13.3398	16.4741	13.4999	30.8753	28.3604	40.6394	10.0638	8.02136	0	33.4815	0	0	0	26.6708	71.4011	60.6802	5.68408	27.4264
ROR1	18.629	39.3825	0	2.07907	24.8167	1.49924	55.4794	169.758	0	332.401	92.5141	1.97715	15.7838	87.788	16.3825	824.35	76.636	51.8367	599.644	220.09	21.3173	3.07706	7.1188	32.4958	233.651	1.75412	980.142	125.401	373.753	8.70035	57.5647	501.488	295.621	65.5398	34.0778	31.3991	24.9036	601.924	202.057	81.6407	0	14.3285	0	21.2085	27.2769	181.748	17.0908	90.9452	446.493
UBE2U	0.339198	0.409382	0	0	0	0	0	0	0	0.374748	0	0.109842	0	0.986382	0	1.14812	1.02067	0.719955	1.44842	0.733836	0.311961	0.506351	0	0.260562	0	0	0	0	1.0184	0.334629	0.414135	0.974709	0.535487	0.435481	0.0821152	0.791896	0.615749	0.642962	0.304608	0	11.1605	0	0	0	0.606154	0	0.470389	0	2.09185
CACHD1	73.0352	23.3348	19.8323	15.9395	18.6126	40.4795	9.53553	35.0586	122.356	117.671	5.90516	109.292	19.7298	31.5642	32.765	198.242	260.958	6.83957	62.2819	75.952	160.452	28.4336	42.7128	56.0952	6.87208	116.649	428.406	7.91366	214.882	147.571	735.96	95.884	126.848	5.87899	112.744	62.5693	506.077	483.032	64.0693	0	66.963	14.3285	0	10.6043	43.34	12.982	26.969	51.1567	69.9606
RAVER2	24.6699	25.136	0	17.3255	3.10209	25.4871	13.8699	29.5231	73.4138	18.9248	33.9547	37.0167	23.6758	10.8502	0	23.9738	50.8613	12.4192	15.2084	50.2066	38.6831	25.2396	66.4421	22.7433	42.9505	25.4347	71.4011	36.5246	12.2208	81.984	82.4128	44.1197	39.0486	3.48384	27.6728	50.2949	126.571	47.1039	18.7842	0	0	0	0	15.9064	32.7323	45.437	39.1991	22.7363	23.7076
JAK1	64.2753	75.8175	0	36.0371	282.29	182.908	140.432	108.866	97.885	109.052	112.198	191.234	31.5677	371.866	270.311	83.7034	53.6481	140.211	132.53	124.446	171.682	34.1982	84.2391	55.2019	213.034	146.469	64.9101	208.799	147.668	256.995	73.5908	58.8652	72.2698	102.773	54.9351	101.167	181.92	95.5218	242.874	40.8203	100.445	157.614	117.362	100.74	51.22	84.3831	66.3248	113.682	81.1171
AK4	1.1522	9.0064	0	0.693022	0	1.49924	0.866866	0	24.4713	2.24849	11.3182	5.16256	0	0	0	2.24157	13.5554	2.69983	18.8294	17.7344	6.96712	5.02456	4.74587	230.746	1.71802	6.1394	25.964	6.69617	12.2208	3.01166	40.8138	6.55311	9.96426	1.0887	25.5378	5.47648	41.8025	10.5669	10.0521	0	22.321	0	0	0	9.39539	0	6.89904	22.7363	18.8266
DNAJC6	98.825	114.709	99.1615	374.232	12.4084	196.401	11.2693	33.2135	97.885	18.3626	69.8777	6.15113	481.407	0	114.677	2.5286	10.8259	1.6199	3.62104	5.0757	1.45582	436.358	58.1369	30.1507	22.3343	283.29	71.4011	18.871	16.2944	12.0466	22.0785	234.522	182.045	5.00803	130.563	121.117	366.371	231.075	11.2705	326.563	0	0	117.362	5.30213	2.72769	25.964	2.03835	34.1045	3.25398
LEPR	24.5461	17.3578	19.8323	108.111	9.30628	49.475	34.6746	25.8327	0	75.1369	9.84193	40.4217	71.0273	4.93191	57.3387	13.7228	13.9625	9.35941	73.8692	12.6587	28.8044	114.825	41.5263	273.851	20.6162	98.2304	71.4011	46.2644	24.4416	63.9141	31.3276	35.1701	45.0544	15.6773	33.1745	48.7684	78.7474	46.6287	65.6939	81.6407	66.963	0	0	42.417	10.6077	19.473	12.2301	31.2624	60.6635
LEPROT	104.489	66.6474	257.82	163.553	49.6335	155.921	78.8848	178.984	122.356	160.205	68.8935	208.04	59.1894	10.8502	73.7212	57.1053	40.0755	36.8977	135.427	50.3901	78.8221	134.3	55.7639	80.2531	34.3604	133.313	103.856	54.7868	94.7112	72.6144	86.1443	45.2474	42.4715	47.6851	98.0456	44.8995	69.5796	48.7812	154.64	81.6407	111.605	0	117.362	58.3234	68.7985	168.766	81.2205	122.208	140.154
PDE4B	9.85827	105.047	813.125	5.54417	105.471	7.49621	235.788	156.841	0	66.7051	17.2234	52.6142	0	144.998	65.5299	97.2621	26.9903	213.467	128.185	140.897	33.0678	4.05081	67.6286	68.4533	113.389	7.01646	253.149	342.722	60.0856	62.5756	1419.86	285.719	1078.21	151.112	3610.11	203.031	570.868	736.75	86.2042	0	111.605	85.971	0	84.8341	53.9477	227.185	32.6136	5.68408	68.3336
SGIP1	7.92538	240.88	0	31.879	3.10209	4.49773	2.6006	16.6067	24.4713	20.9859	169.281	3.40509	55.2434	0	0	47.9476	17.208	0.899943	5.06945	3.42457	5.61529	22.8247	13.0511	208.747	5.15406	4.38529	25.964	5.47868	25.46	6.02332	220.522	298.358	551.919	6.96769	409.673	419.008	503.751	474.813	22.9472	0	133.926	0	0	0	40.9154	0	4.70389	14.2102	6.50796
AL139147.1	0.172291	0.573135	0	0.693022	0	0	0	1.84519	0	0	0	0.219683	0	0	0	0.232357	0.286704	0	0	0	0	0	0	0.670016	0	0	0	0	0	0	0.841211	1.07137	2.22595	0	2.135	1.85094	1.91566	1.92889	0.101536	0	0	0	0	0	0	0	0	0	0
TCTEX1D1	0.743004	0.655011	0	2.07907	3.10209	31.4841	4.33433	0	0	0.187374	0.492097	8.78734	0	1.97276	16.3825	0.984102	0.332577	6.11961	0	0.122306	12.9984	1.20745	49.8316	18.5743	0	28.0658	0	3.65246	2.0368	3.34629	11.2161	0.451105	2.55144	3.04836	0.16423	3.80205	19.225	1.62138	16.0427	0	0	0	0	5.30213	0	0	0.156796	5.68408	0
WDR78	16.3946	14.4921	19.8323	8.31626	3.10209	7.49621	2.6006	11.0712	0	24.3586	31.9863	18.1239	0	3.94553	0	17.8642	28.9456	1.07993	6.51787	27.4577	10.3987	20.4098	13.0511	11.4647	20.6162	7.89352	84.3831	9.13114	21.3864	28.4434	62.4178	13.7909	34.2712	10.4515	12.153	41.1881	51.1756	21.1618	12.5905	0	33.4815	14.3285	0	0	11.82	0	7.05583	31.2624	12.0862
MIER1	91.158	42.6576	118.994	63.758	71.3481	47.9757	73.6836	57.2009	48.9425	62.3955	63.4805	58.1063	74.9732	72.9923	106.486	58.4584	52.2604	54.8965	54.3156	60.9696	63.64	100.569	93.7309	48.6878	72.1568	86.8287	77.8921	76.0928	63.1408	54.8791	62.159	47.358	45.7684	68.1527	55.9205	80.9546	81.2104	46.0137	58.7894	81.6407	33.4815	42.9855	0	37.1149	46.6739	38.946	40.767	73.893	52.0637
SLC35D1	78.6831	24.7267	158.658	25.6418	80.6544	82.4583	31.2072	38.749	48.9425	41.9717	29.0337	29.3277	0	49.3191	40.9562	34.5393	34.1407	13.1392	18.8294	30.76	24.3329	29.0957	39.1534	157.044	91.0551	82.4434	45.437	38.3508	54.9936	36.8092	58.531	39.6046	47.1124	18.7257	45.5739	66.1281	54.0491	42.6871	17.8704	0	33.4815	28.657	0	31.8128	21.2154	51.928	27.2826	19.8943	32.075
C1orf141	5.20642	0.655011	0	1.38604	3.10209	4.49773	0	1.84519	0	0.562121	2.95258	0.65905	0	3.94553	8.19124	2.2689	1.96106	2.69983	3.62104	3.1188	0.935882	1.12955	1.18647	1.41448	5.15406	0	0	1.21749	2.0368	0.334629	1.60046	0.922349	1.08147	0.653221	1.0675	2.28028	1.91566	1.00638	0.304608	0	0	0	0	0	0.909231	0	0.940778	0	0.464855
IL23R	19.1081	0.90064	19.8323	1.38604	15.5105	0	0.866866	7.38077	0	2.43586	1.96839	1.20826	0	5.91829	0	0.560392	0.527535	0.179989	0	0.550377	1.24784	0.11685	0	0.707239	32.6424	0	0	0	1.0184	0.669257	0.297659	0.338329	0.367491	0.435481	0.246346	0.672634	0.410499	0.335458	0.101536	0	0	14.3285	0	0	0	0	0.313593	0	0.232427
IL12RB2	11.2581	1.3919	19.8323	10.3953	148.9	5.99697	8.66866	1.84519	0	1.31162	1.96839	1.75747	0	112.448	0	3.99108	2.11014	18.1789	2.89683	3.30226	2.3917	14.3726	181.529	2.68006	134.006	5.26235	0	9.13114	0	1.00389	1.6134	1.73998	2.02645	1.30644	1.23173	14.4688	6.43115	2.12457	0.812289	0	0	28.657	0	90.1362	0.909231	0	2.66554	0	0.929709
SERBP1	138.242	134.277	19.8323	194.739	192.33	206.895	110.959	171.603	73.4138	96.6849	107.769	111.599	205.19	234.759	180.207	135.587	165.767	103.133	161.498	169.883	153.693	121.096	85.4256	114.536	94.4911	65.7793	162.275	53.5694	75.3616	40.4901	104.603	84.3083	86.728	74.0317	79.6517	87.7621	82.2367	83.6969	157.483	530.664	89.284	214.928	0	53.0213	250.342	103.856	426.643	130.734	107.381
GADD45A	9.67521	11.0533	19.8323	52.6697	0	58.4704	5.2012	9.22596	0	10.4929	7.87354	5.05272	106.541	16.7685	73.7212	8.87059	11.9785	1.97988	8.69049	10.1514	5.92725	18.2286	3.5594	10.1991	5.15406	14.91	6.49101	2.43497	8.1472	2.67703	2.32951	2.9926	4.50439	0.870961	4.02364	1.98451	0.752582	9.89602	39.7006	0	11.1605	0	0	0	3.63692	0	19.4427	2.84204	6.50796
GNG12	116.404	20.1416	297.485	9.00928	34.123	10.4947	26.006	77.4981	97.885	156.645	27.0653	91.8277	0	1.97276	49.1475	137.925	51.8992	3.05981	171.637	48.6778	78.7181	3.03811	7.1188	77.7963	3.43604	14.0329	51.928	34.0896	169.054	171.665	94.1121	4.68021	2.91893	3.91932	124.322	3.40134	2.0525	8.77783	49.3466	0	156.247	42.9855	117.362	10.6043	33.6415	129.82	31.6728	79.5771	119.468
DIRAS3	12.7388	5.56759	19.8323	1.38604	3.10209	4.49773	3.46746	14.7615	0	7.30758	20.176	4.06414	0	0	0	1.8862	0.900251	0.719955	0	1.52883	1.87176	0.350551	1.18647	0.372231	0	0	6.49101	0.608743	5.092	3.01166	1.86792	0.277913	0.482989	0.870961	3.85941	10.6	1.09466	0.950465	2.5384	0	11.1605	0	0	0	3.33385	6.49101	8.78059	5.68408	7.20525
WLS	71.4792	7.36887	138.826	4.85115	12.4084	2.99848	30.3403	138.389	97.885	94.6238	11.3182	22.9569	7.89192	0	32.765	125.432	27.3802	20.6987	154.256	89.0388	39.931	2.337	1.18647	5.36013	0	1.75412	51.928	3.65246	135.447	68.9335	93.245	7.55198	7.12933	84.4832	90.0804	259.484	12.7939	9.2251	152.913	0	55.8025	0	0	68.9277	59.1	97.3651	72.4399	102.313	222.433
DEPDC1	5.05566	20.551	0	31.186	18.6126	31.4841	2.6006	9.22596	24.4713	7.12021	2.46048	11.6432	59.1894	4.93191	0	4.92051	9.44403	3.59977	9.4147	4.21956	4.05549	38.2879	13.0511	6.4396	12.0261	8.77058	0	7.30491	8.1472	2.67703	8.89526	3.1819	0.43049	4.79029	7.71883	0.596307	0.20525	0.531142	5.07681	40.8203	0	57.314	0	10.6043	30.0046	6.49101	3.76311	2.84204	17.432
LRRC7	12.3511	81.5489	0	40.8883	12.4084	14.9924	11.2693	210.352	0	368.564	21.6522	8.45781	7.89192	12.823	16.3825	35.8651	119.103	9.5394	155.705	14.5544	5.51131	54.7638	22.5429	32.1236	25.7703	30.697	12.982	26.7847	374.771	18.4046	76.5545	765.066	943.634	33.9675	450.73	1268.45	1653.63	1154.31	32.187	40.8203	22.321	0	0	15.9064	283.983	486.825	113.364	22.7363	482.519
LRRC40	19.8673	60.7523	19.8323	35.3441	24.8167	31.4841	30.3403	20.2971	97.885	30.1672	26.5732	37.3462	11.8379	27.6187	0	31.3273	34.2153	20.8787	36.9346	24.2777	24.9569	55.426	32.0346	35.8831	32.6424	34.2052	19.473	21.9147	19.3496	32.1244	50.1232	77.5417	68.6999	31.5723	46.9699	90.8295	117.745	70.586	34.4208	81.6407	44.642	0	0	15.9064	26.0646	19.473	30.4185	34.1045	30.448
SRSF11	154.556	142.137	138.826	164.246	189.228	146.926	103.157	151.306	195.77	202.176	196.839	140.597	169.676	159.794	212.972	165.247	176.455	132.832	162.947	157.775	135.911	226.806	210.005	179.304	197.572	193.83	259.64	121.14	244.416	156.606	155.016	154.926	162.599	144.362	176.958	191.319	167.415	171.251	131.895	40.8203	178.568	128.957	117.362	137.855	173.057	142.802	130.141	221.679	186.407
ANKRD13C	75.0058	60.6704	39.6646	76.2324	52.7356	41.9788	73.6836	55.3558	24.4713	81.695	66.9251	73.8136	63.1354	58.1966	16.3825	78.9469	82.4217	41.2174	57.9366	57.6673	72.1669	114.046	94.9173	76.0468	99.6452	75.4269	64.9101	82.789	95.7296	104.739	91.7998	100.335	120.201	84.9187	106.175	165.158	141.759	112.546	52.1896	81.6407	33.4815	85.971	0	90.1362	64.8585	38.946	42.1782	51.1567	79.7226
HHLA3	8.03306	2.70192	0	2.77209	0	2.99848	2.6006	11.0712	24.4713	5.24647	3.93677	3.07557	7.89192	5.91829	0	6.57435	5.81436	2.51984	13.0357	6.91029	4.26346	3.15496	8.30527	8.82188	5.15406	5.26235	0	1.82623	6.1104	1.00389	7.63561	2.56566	5.73286	3.48384	3.7773	6.23022	10.8782	1.95684	4.26452	0	11.1605	0	0	10.6043	4.54615	6.49101	4.0767	11.3682	7.20525
CTH	10.2459	2.45629	0	2.07907	0	1.49924	1.73373	3.69038	24.4713	1.87374	1.96839	2.52636	0	5.91829	0	4.42846	8.92796	2.87982	4.34525	7.21606	2.80765	3.58341	2.37293	37.6326	0	1.75412	0	1.82623	0	1.67314	7.57952	3.17385	4.01091	1.0887	5.99441	6.20159	4.24183	2.79549	0.507681	0	0	0	0	0	0.909231	6.49101	1.09757	2.84204	2.09185
PTGER3	1.30833	35.125	0	5.54417	0	200.898	0.866866	1.84519	0	12.7414	162.884	0.65905	0	1.97276	98.2949	1.57183	14.0198	3.77976	25.3473	6.17645	0.935882	5.06351	2.37293	3.42453	1.71802	142.96	32.455	1.82623	18.3312	2.00777	5.82377	16.9728	11.8122	3.70158	67.3345	542.673	5.06282	8.19077	6.39678	0	0	0	117.362	0	2.12154	0	3.13593	11.3682	5.57826
ZRANB2	103.299	73.7706	79.3292	74.1533	89.9607	77.9606	72.8167	64.5817	0	105.679	120.564	70.2987	59.1894	81.8697	16.3825	90.5784	106.281	47.517	76.766	89.2223	54.5931	105.749	130.511	91.9783	113.389	79.8122	136.311	85.224	99.8032	87.0035	100.031	100.339	116.243	84.2655	106.093	153.599	123.15	108.856	63.5616	81.6407	78.1235	143.285	0	63.6256	102.137	110.347	80.7501	82.4191	102.733
NEGR1	9.29832	447.536	0	3.46511	31.0209	1.49924	11.2693	369.038	0	55.4627	922.189	5.38224	3.94596	21.7004	8.19124	28.3749	39.4906	30.5981	235.367	8.31681	15.598	5.14141	13.0511	15.9315	61.8487	6.1394	19.473	32.8721	4.0736	7.0272	662.464	266.478	676.993	17.2015	877.237	617.97	685.876	2227.86	25.0794	0	245.531	0	0	106.043	15.76	84.3831	28.0665	22.7363	1476.84
LRRIQ3	8.16228	2.12879	0	0.693022	9.30628	0	0.866866	3.69038	0	2.43586	5.90516	1.53778	3.94596	4.93191	0	2.06388	5.04026	1.25992	0.724208	5.44262	0.415948	2.84336	5.93233	20.2866	3.43604	2.63117	0	4.86994	0	1.67314	3.61074	1.76012	3.63291	0.435481	3.12038	10.3471	17.1726	1.62138	0.913825	0	0	28.657	0	0	1.51538	0	2.03835	0	0.464855
FPGT	14.0794	12.4452	39.6646	22.1767	12.4084	8.99545	11.2693	38.749	0	29.4177	28.5416	10.7645	23.6758	0.986382	8.19124	10.087	7.36256	7.55952	5.79366	9.35641	5.51131	12.5809	7.1188	16.8993	6.87208	10.5247	19.473	12.7836	12.2208	8.03109	34.7442	8.92946	10.4053	10.2338	19.5434	11.8403	18.1304	9.14124	10.5598	0	0	0	0	10.6043	16.9723	51.928	12.7005	19.8943	19.059
FPGT-TNNI3K	5.9548	5.8951	0	0.693022	0	0	3.46746	16.6067	0	13.6783	18.2076	1.97715	0	0	0	3.36235	2.67208	0.719955	0.724208	2.69073	4.99137	2.72651	4.74587	4.05732	0	1.75412	12.982	3.04371	1.0184	2.00777	19.9647	6.80685	10.4578	4.57255	14.2059	12.718	15.6674	9.92398	2.2338	0	0	0	0	10.6043	2.12154	0	6.42865	8.52612	5.81068
TNNI3K	3.95731	4.58508	0	2.77209	0	0	0	7.38077	0	9.55606	11.8103	1.53778	0	1.97276	0	2.73362	2.05854	0.179989	5.79366	1.83459	1.66379	1.4022	2.37293	3.12674	0	0.877058	6.49101	1.21749	2.0368	0.334629	11.0997	4.29758	7.19233	0.870961	7.71883	8.94938	9.5099	6.26189	1.1169	0	0	0	0	5.30213	3.63692	0	5.01748	0	5.34583
LRRC53	4.75415	1.96503	0	0.693022	0	5.99697	0	1.84519	0	3.5601	2.46048	2.6362	15.7838	4.93191	0	3.08899	4.31203	3.59977	3.62104	6.54337	4.57542	13.0872	10.6782	16.8621	12.0261	9.64763	0	10.3486	6.1104	9.03497	3.90408	5.13535	4.95588	3.2661	4.92691	6.67387	8.6889	7.82736	5.48295	0	11.1605	0	0	15.9064	28.4892	64.9101	80.1229	8.52612	48.3449
C1orf173	0.59225	27.1011	19.8323	0	3.10209	0	0.866866	0	0	0.562121	73.3224	0.988575	0	0	0	1.18912	5.20655	1.07993	2.17262	4.89224	4.15948	0.506351	0	1.86116	0	0.877058	0	0	0	0	11.1601	4.31772	6.44685	1.74192	20.8573	77.2385	16.8989	7.85532	2.33533	0	0	0	0	0	0	0	1.56796	0	0.929709
CRYZ	10.3213	5.64947	0	2.77209	9.30628	10.4947	3.46746	25.8327	0	11.2424	6.39725	8.78734	0	1.97276	8.19124	9.48565	16.1242	5.21967	10.1389	38.7099	5.71928	7.20576	5.93233	127.415	10.3081	8.77058	12.982	16.4361	7.1288	15.7275	17.385	2.88788	2.20495	6.09673	8.45787	1.00657	1.02625	1.7332	6.39678	0	44.642	0	0	15.9064	10.3046	19.473	18.8156	19.8943	10.6917
TYW3	22.2363	19.4866	0	15.2465	18.6126	20.9894	15.6036	25.8327	48.9425	21.3606	26.0811	16.0369	23.6758	26.6323	0	21.5272	23.9455	9.71939	21.002	18.8351	22.4612	22.2405	40.3399	24.7906	32.6424	21.9264	25.964	18.871	14.2576	21.4162	25.15	12.9491	17.8706	13.9354	24.4703	14.3495	14.5043	16.1579	20.2057	0	33.4815	28.657	0	21.2085	31.52	38.946	18.8156	17.0522	27.4264
SLC44A5	38.3293	403.159	39.6646	6.2372	9.30628	5.99697	3.46746	55.3558	0	12.7414	29.5258	4.83303	3.94596	2.95915	0	26.3931	88.5571	2.69983	20.2778	16.0832	3.01562	5.14141	0	24.3811	3.43604	0	19.473	4.86994	119.153	104.739	394.092	130.865	918.256	12.1935	606.257	306.158	2722.91	338.729	15.0274	0	22.321	0	0	0	4.54615	25.964	11.2893	2.84204	10.2268
ACADM	100.386	60.0154	39.6646	55.4417	65.1439	46.4765	58.08	73.8077	146.828	65.5808	69.3856	53.7126	23.6758	26.6323	49.1475	29.3591	34.1522	26.2783	50.6945	34.6738	29.2203	73.343	75.9339	117.96	61.8487	46.484	64.9101	46.2644	38.6992	108.754	54.6528	60.9193	68.9939	54.2173	51.8968	64.5872	103.925	65.4144	39.9037	81.6407	11.1605	14.3285	117.362	21.2085	43.9462	19.473	63.5025	31.2624	47.6476
RABGGTB	34.9535	23.6623	19.8323	20.7907	21.7146	13.4932	23.4054	12.9163	0	20.7985	24.1127	11.8629	35.5136	15.7821	8.19124	9.40364	10.7055	18.5388	11.5873	10.0902	9.77477	35.4446	24.9158	23.2645	20.6162	26.3117	19.473	19.4798	10.184	11.712	8.9686	8.92543	10.3423	18.0724	11.4961	13.6387	14.3675	6.8769	12.3874	40.8203	33.4815	28.657	0	10.6043	21.5185	32.455	46.8821	11.3682	13.4808
MSH4	1.46447	7.53263	0	0	0	2.99848	7.80179	1.84519	0	7.68233	2.46048	2.19683	23.6758	1.97276	0	4.33278	2.8441	1.79989	3.62104	1.58998	2.59967	4.67401	3.5594	2.19616	3.43604	3.50823	0	8.5224	10.184	4.6848	4.85314	6.13825	13.0092	5.44351	4.10576	12.2314	31.2664	6.73712	2.74148	0	0	0	0	0	2.12154	0	9.09418	0	3.71884
ST6GALNAC3	6.9024	44.1314	39.6646	33.265	52.7356	7.49621	17.3373	94.1048	0	243.586	34.4468	1223.09	138.109	52.2783	311.267	560.036	152.435	49.3169	118.77	40.4833	379.968	70.227	96.1038	10.5714	113.389	7.01646	110.347	14.6098	424.673	650.184	182.223	203.618	175.262	169.837	67.4987	499.247	197.587	818.295	279.631	40.8203	145.087	28.657	0	21.2085	69.7077	214.203	10.1918	22.7363	74.6092
ST6GALNAC5	1.82521	94.8947	0	3.46511	0	17.9909	0.866866	49.8202	0	45.1571	83.6564	1.97715	0	1.97276	0	53.8249	33.963	2.51984	30.4167	9.60102	30.5722	1.83065	43.8993	3.23841	1.71802	17.5412	45.437	0.608743	0	2.67703	124.34	46.8183	68.8469	3.48384	12.4815	692.718	387.648	634.324	20.1042	0	0	42.9855	0	0	45.7646	168.766	10.5054	8.52612	15.1078
PIGK	17.186	30.7855	19.8323	27.7209	15.5105	50.9742	36.4084	51.6654	0	30.1672	28.0495	28.1195	11.8379	26.6323	8.19124	20.8302	17.833	13.3192	27.5199	17.2452	18.8216	60.0221	64.0692	27.024	46.3865	25.4347	25.964	27.3934	41.7544	25.4318	43.4324	37.925	54.0317	32.661	54.196	65.6701	69.7849	37.18	21.5257	0	33.4815	42.9855	117.362	47.7192	46.0677	38.946	34.0248	36.9465	40.4424
AK5	3.94654	35.8618	0	1.38604	9.30628	0	2.6006	11.0712	0	5.05909	36.4151	2.08699	3.94596	6.90468	0	4.61981	8.69287	2.69983	8.69049	4.40302	3.84752	1.44115	7.1188	2.49395	25.7703	2.63117	12.982	2.43497	23.4232	1.00389	6.80734	43.5639	136.161	4.13707	39.9901	176.354	114.324	34.1608	3.6553	0	0	0	0	5.30213	77.2846	58.4191	5.80146	8.52612	11.6214
ZZZ3	144.88	77.2094	79.3292	58.9069	102.369	77.9606	97.9559	57.2009	171.299	105.679	129.421	98.9674	19.7298	84.8289	49.1475	96.2507	122.612	71.9955	90.5259	119.31	110.33	141.467	164.919	160.804	163.212	135.067	90.8741	126.618	131.374	130.505	130.37	116.703	150.451	136.523	208.573	178.363	180.756	118.668	76.3552	0	89.284	100.3	117.362	63.6256	132.142	142.802	59.4258	62.5249	86.9278
USP33	94.0708	111.516	59.4969	117.121	58.9398	95.9515	102.29	60.8913	146.828	104.18	111.214	102.043	161.784	72.9923	180.207	106.269	90.7476	53.9966	92.6986	77.7866	89.0128	164.603	130.511	89.2611	142.596	150.854	77.8921	105.921	131.374	129.167	118.024	175.56	200.241	107.781	143.866	190.308	222.559	188.556	76.3552	81.6407	66.963	85.971	0	68.9277	83.9523	51.928	43.903	107.997	75.3065
FAM73A	48.5699	62.6354	79.3292	30.493	43.4293	40.4795	51.1451	55.3558	0	52.652	69.3856	43.1678	7.89192	40.4417	90.1037	43.9702	33.3207	27.5383	39.8314	39.8106	41.8027	47.4022	65.2557	47.6828	63.5667	57.0087	51.928	35.3071	58.0488	44.171	64.4065	68.4592	78.6221	48.1206	64.2962	110.97	108.577	65.4703	47.722	0	78.1235	42.9855	0	26.5106	46.6739	38.946	26.6554	53.9987	60.1987
NEXN	27.7981	4.83071	39.6646	4.85115	6.20418	539.727	7.80179	11.0712	146.828	58.4606	4.92097	4.94288	0	2.95915	229.355	52.0344	3.99665	2.33985	34.762	5.87069	3.01562	7.16681	3.5594	6.73739	1.71802	437.652	38.946	4.2612	16.2944	9.03497	13.8519	7.89434	11.5707	4.35481	6.81556	121.317	24.6984	9.81216	5.48295	40.8203	0	0	1056.26	5.30213	78.1939	64.9101	764.382	25.5784	34.1668
FUBP1	81.3321	112.416	99.1615	73.4603	62.0418	83.9575	49.4114	64.5817	122.356	77.9475	98.9114	62.9393	130.217	109.488	73.7212	118.94	127.239	71.9955	100.665	116.619	80.7978	131.963	103.223	64.5821	127.133	81.5663	58.4191	68.7879	86.564	64.2487	103.327	108.072	114.794	57.4834	98.6204	120.907	102.146	103.685	66.5062	122.461	66.963	28.657	0	106.043	126.989	97.3651	97.2137	71.051	65.5445
DNAJB4	74.9412	24.3992	118.994	31.186	12.4084	19.4901	33.8078	36.9038	24.4713	51.9025	27.0653	24.0553	23.6758	19.7276	32.765	64.7184	24.7884	34.7378	44.9009	23.6662	27.0366	34.5098	29.6617	40.9827	18.8982	34.2052	51.928	21.9147	48.8832	29.782	40.0848	30.22	45.6424	10.887	22.9101	87.8098	96.8778	28.2624	21.7287	0	66.963	0	0	10.6043	47.8862	12.982	79.6525	34.1045	34.1668
GIPC2	125.245	22.8435	39.6646	25.6418	31.0209	13.4932	19.0711	22.1423	195.77	24.3586	12.3024	13.0712	23.6758	3.94553	32.765	6.64269	8.23414	5.75964	3.62104	5.56492	6.65516	22.2405	1.18647	86.0226	6.87208	8.77058	19.473	6.08743	15.276	10.0389	5.63827	9.40071	20.0965	1.52418	6.4871	42.667	67.5955	12.1604	7.51368	0	33.4815	0	0	15.9064	11.82	6.49101	39.1991	5.68408	6.50796
PTGFR	6.78934	31.8499	0	1.38604	6.20418	0	0.866866	1.84519	0	3.74748	13.7787	0.65905	0	0	8.19124	0.628732	1.10668	0.179989	18.8294	1.10075	1.66379	0.11685	0	3.57342	0	1.75412	0	0.608743	0	0	5.75906	0.809572	0.83998	0.21774	0.656922	1.5981	1.16308	0.503188	0.812289	0	0	0	0	0	50.3108	6.49101	619.502	5.68408	7.43767
IFI44L	5.19565	1.55565	0	0.693022	15.5105	0	82.3523	36.9038	0	13.3035	1.47629	114.345	0	1.97276	32.765	2.36458	3.5494	12.0592	7.96628	10.5183	14.2462	1.12955	7.1188	2.19616	1.71802	1.75412	0	137.576	1.0184	150.583	102.231	3.48801	2.76143	3.70158	3.12038	2.8909	1.71041	4.27709	87.5242	0	0	0	0	5.30213	0	32.455	0.783981	0	0.232427
IFI44	9.88519	1.7194	0	0.693022	3.10209	4.49773	22.5385	11.0712	0	15.7394	0.492097	42.9481	0	0	0	3.60837	0.412854	2.15986	7.96628	3.42457	12.3744	0.506351	4.74587	1.04225	1.71802	0.877058	0	24.9585	14.2576	69.2681	31.8409	1.32109	3.95841	5.87899	4.51634	0.572455	0.342083	1.7332	38.4822	0	11.1605	0	0	10.6043	0	6.49101	1.41117	11.3682	3.02156
ELTD1	3.84424	2.70192	0	0.693022	0	1.49924	3.46746	9.22596	0	27.1692	3.44468	535.918	7.89192	0.986382	32.765	3.66305	0.825708	1.43991	2.17262	1.0396	226.276	0.662151	0	1.15392	3.43604	0.877058	0	0.608743	1.0184	136.528	0.832583	1.97358	0.902979	0.653221	0.16423	0.72988	2.18933	0.866601	381.268	40.8203	55.8025	0	0	0	0.909231	0	4.86068	17.0522	4.88097
LPHN2	864.653	37.09	138.826	22.1767	93.0628	16.4917	207.181	142.08	1321.45	519.588	65.4488	908.061	19.7298	12.823	122.869	208.507	219.283	15.119	343.274	239.231	434.041	14.4115	18.9835	175.47	54.9766	21.0494	214.203	18.871	1445.11	945.995	84.6603	920.54	153.202	283.498	165.708	7378.43	1933.25	178.632	440.667	0	44.642	28.657	0	74.2298	165.48	142.802	127.005	179.048	423.018
TTLL7	5.20642	182.175	19.8323	9.00928	3.10209	26.9864	1.73373	60.8913	0	26.045	93.0062	2.74604	11.8379	0	16.3825	6.56068	26.5775	0.359977	84.0081	6.35991	5.30333	19.6308	3.5594	6.40238	5.15406	37.7135	6.49101	1.82623	9.1656	1.00389	106.001	286.875	270.358	5.22577	156.429	531.386	592.624	306.861	15.2304	0	0	0	0	5.30213	166.389	58.4191	153.817	42.6306	74.1443
PRKACB	79.0384	344.781	59.4969	45.7394	179.921	119.939	74.5505	94.1048	122.356	109.426	221.936	62.2802	3.94596	143.025	65.5299	101.117	84.6637	59.5762	98.4922	61.0307	59.1686	53.0111	230.175	86.3204	175.238	187.69	77.8921	92.5289	133.41	64.918	253.795	306.465	500.87	47.0319	342.913	244.367	450.386	459.438	87.7272	0	33.4815	157.614	0	58.3234	112.442	97.3651	62.4049	144.944	111.1
SAMD13	7.25775	2.12879	0	0.693022	3.10209	1.49924	2.6006	7.38077	24.4713	2.62323	0	1.3181	0	7.89106	0	0.984102	2.86704	0.899943	2.17262	3.60803	1.87176	1.36325	1.18647	1.97283	0	0.877058	0	4.86994	2.0368	1.67314	9.38705	2.81538	6.52035	1.52418	7.80094	1.26417	6.70482	3.32663	3.85837	0	0	0	0	0	3.94	0	7.83981	0	3.02156
RPF1	12.1573	15.7203	0	9.70231	18.6126	14.9924	12.1361	16.6067	0	9.55606	18.2076	9.2267	15.7838	14.7957	16.3825	8.26919	10.8603	7.37953	9.4147	10.3349	6.86314	11.1397	9.49173	9.38023	17.1802	7.89352	0	14.0011	9.1656	6.35794	10.3706	9.7632	11.4867	15.2418	8.21152	11.5302	12.9307	8.38646	13.8089	0	0	57.314	117.362	0	16.6692	0	20.3835	17.0522	9.99437
GNG5	56.183	58.5416	59.4969	79.6975	37.2251	79.4598	59.8138	95.95	48.9425	55.8374	40.3519	80.4041	51.2975	51.2919	90.1037	30.9445	37.8621	51.6567	57.2124	51.0016	48.3539	35.912	34.4075	68.0439	20.6162	18.4182	58.4191	42.612	27.4968	26.7703	25.4606	12.9572	7.71732	34.1852	10.2644	4.7466	3.83133	6.28984	93.3117	40.8203	55.8025	42.9855	0	68.9277	88.4985	58.4191	253.069	62.5249	56.2474
CTBS	27.8304	20.0597	39.6646	14.5535	15.5105	25.4871	58.08	29.5231	0	22.1101	32.9705	28.5588	3.94596	14.7957	24.5737	13.3264	6.90383	19.7988	19.5536	12.6587	13.2063	7.47841	13.0511	25.6095	8.5901	11.4017	19.473	43.2207	16.2944	21.0816	6.44065	5.96103	3.61191	44.2013	3.94153	7.91419	3.55766	9.67238	20.2057	0	11.1605	14.3285	0	31.8128	11.82	6.49101	5.17428	14.2102	27.194
SSX2IP	3.73117	34.3062	0	103.953	15.5105	104.947	3.46746	3.69038	0	13.6783	36.4151	2.30668	209.136	16.7685	73.7212	18.9713	28.4296	6.11961	26.7957	23.6051	4.26346	139.636	33.2211	30.7091	32.6424	105.247	32.455	14.6098	5.092	10.3735	22.7903	23.7676	35.7727	8.49187	20.693	58.8865	37.287	21.2457	13.0982	81.6407	0	0	0	5.30213	30.3077	38.946	32.9272	14.2102	19.5239
LPAR3	0.26382	0.327505	0	0	0	0	0	0	0	1.12424	0	0.109842	0	1.97276	0	0.833753	1.59407	0.719955	0.724208	12.3529	0	0.467401	3.5594	17.9788	3.43604	0	0	1.82623	0	0	0.349426	0.294024	0.230995	0.21774	0.410576	0.267146	0.547332	0.335458	0.304608	0	0	0	0	0	0	0	0.156796	0	0
MCOLN2	3.05278	0.245629	0	1.38604	3.10209	0	13.003	1.84519	0	0.374748	0	0.439367	0	5.91829	0	0.519387	1.58834	30.958	0	2.75189	0.103987	0.623201	10.6782	0.521124	42.9505	3.50823	58.4191	21.9147	7.1288	0	0.444332	0.994848	0.283493	1.0887	0.16423	0.376866	0.342083	0.139774	0.203072	0	0	0	0	47.7192	0.303077	0	0.156796	0	0.929709
WDR63	3.8927	0.736887	0	1.38604	0	0	3.46746	0	0	1.49899	0.492097	0.65905	0	0.986382	0	1.40781	3.02186	1.25992	0	4.15841	2.07974	0.545301	1.18647	1.00502	1.71802	1.75412	19.473	0.608743	1.0184	0.669257	8.04974	1.2204	1.14447	1.74192	0.985382	1.79369	1.98408	1.34183	0.710753	0	0	0	0	15.9064	0.303077	0	0.627185	0	1.62699
MCOLN3	2.96125	0.245629	19.8323	0	0	0	0.866866	0	0	0.562121	0.984193	0.109842	0	0	0	0.492051	7.58046	0.719955	0	7.33836	0.415948	0.0779001	0	0.260562	0	0.877058	12.982	0	0	0.334629	0.228637	1.49026	0.524988	0	0.16423	0.162196	0.136833	0.167729	0.101536	0	0	0	0	0	0.606154	6.49101	0.470389	0	6.97282
SYDE2	4.15113	1.14627	19.8323	2.77209	0	5.99697	0	25.8327	0	10.8677	0.984193	1.3181	0	0	0	13.5041	14.685	0.179989	10.8631	20.9143	0.103987	9.38697	2.37293	16.8249	1.71802	5.26235	51.928	0	88.6008	0.334629	1.29848	2.36427	3.10793	0	2.38134	2.44724	1.2315	0.363413	0.710753	0	0	0	0	0	6.66769	25.964	15.9932	0	14.6429
C1orf52	19.975	29.3936	39.6646	13.1674	9.30628	22.4886	14.7367	23.9875	73.4138	23.4217	22.1443	15.268	15.7838	13.8094	0	13.5587	13.1368	9.35941	17.381	15.2271	11.6465	20.0203	29.6617	22.0733	22.3343	14.91	6.49101	17.0448	13.2392	13.7198	18.7094	20.6179	24.9999	10.0161	20.2825	29.3431	35.0293	19.3168	16.6519	40.8203	11.1605	14.3285	0	10.6043	20.3062	38.946	18.6588	17.0522	22.5454
BCL10	19.0974	15.7203	19.8323	9.00928	9.30628	14.9924	16.4705	23.9875	0	17.4258	13.2866	18.2337	0	21.7004	0	9.28063	12.3397	11.5193	12.3115	17.5509	11.6465	4.44031	4.74587	8.22631	3.43604	6.1394	6.49101	8.5224	7.1288	8.36572	10.0643	8.43808	9.50228	5.22577	7.88306	12.4652	10.9466	9.67238	19.0888	0	11.1605	14.3285	0	0	15.1538	6.49101	12.3869	11.3682	17.6645
DDAH1	3.81732	65.8286	19.8323	4.15813	0	5.99697	0	49.8202	0	91.8132	32.9705	1.75747	7.89192	5.91829	8.19124	205.213	51.4462	2.87982	61.5576	143.22	4.67941	6.46571	16.6105	237.632	6.87208	15.787	123.329	7.30491	70.2696	7.69646	322.274	131.11	156.509	6.74995	331.992	283.933	166.321	162.446	31.7808	40.8203	0	0	0	0	129.111	97.3651	111.325	76.7351	33.9344
CYR61	1.10912	0.736887	39.6646	0	0	4.49773	0.866866	44.2846	0	60.5217	0.984193	0.878734	3.94596	9.86382	0	83.4847	26.9043	1.25992	65.1787	59.7465	3.43157	1.0906	0	2.94063	1.71802	0.877058	220.694	0	44.8096	1.67314	2.77384	0.853877	0.346492	0.21774	1.72442	0.639241	0.547332	0.531142	30.4608	40.8203	0	0	0	0	26.9739	19.473	31.0457	76.7351	36.4911
ZNHIT6	29.1118	25.5454	0	19.4046	71.3481	41.9788	34.6746	31.3683	48.9425	48.5298	25.589	24.4947	11.8379	28.6051	16.3825	37.7239	33.2749	13.1392	45.6251	41.4006	26.8286	45.9221	64.0692	27.3962	63.5667	40.3446	71.4011	32.8721	47.8648	28.4434	47.4659	46.9633	67.6709	26.3466	50.0903	93.0525	85.1786	41.3452	23.9625	0	44.642	57.314	0	26.5106	39.4	45.437	30.5753	42.6306	52.5286
COL24A1	5.11489	2.45629	0	2.07907	9.30628	625.184	3.46746	16.6067	0	23.9838	4.42887	1.53778	0	0.986382	253.929	9.95037	12.5232	8.27948	51.4187	4.0361	1.35183	2.88231	147.122	3.83398	27.4883	1535.73	12.982	5.47868	17.3128	3.01166	8.72702	8.14808	48.6769	15.895	7.63671	1056.28	9.0994	9.67238	6.29524	0	11.1605	57.314	1056.26	5.30213	5.15231	12.982	20.6971	36.9465	179.434
ODF2L	49.1783	58.296	39.6646	24.9488	71.3481	17.9909	23.4054	20.2971	48.9425	45.1571	54.6227	71.9463	7.89192	47.3464	32.765	44.845	40.8152	28.4382	44.9009	65.0057	91.6125	41.1313	77.1203	10.7203	97.9271	51.7464	58.4191	28.6109	58.0488	103.4	94.936	64.1214	79.4411	31.1369	70.7833	252.996	234.6	67.1476	30.1562	0	44.642	85.971	0	42.417	23.0339	45.437	19.5995	53.9987	44.3936
CLCA2	0.247668	0.163753	0	0	0	1.49924	0	0	0	0	0.492097	0.109842	0	0	0	0.0136681	0.12615	0.179989	0	0.244612	0.103987	0.0779001	1.18647	0.0744462	0	0	0	0.608743	0	0.334629	0.0949058	0.112776	0.0734983	0	0.0821152	0.162196	0.273666	0	0	0	0	0	0	0	0	0	0.156796	0	0.232427
CLCA1	0.0915295	0.0818764	0	0	0	0	0	0	0	0	0	0	0	0	0	0.28703	0.286704	0.539966	0.724208	0.489224	0.623922	0.1558	0	0.0744462	0	0	0	0	0	0	0.120789	0.153053	0.220495	0	0.246346	0.31008	0.273666	0.223639	0	0	0	0	0	0	0	0	0	0	0
SH3GLB1	46.5993	117.083	39.6646	34.6511	49.6335	59.9697	44.2102	95.95	24.4713	74.9495	72.8303	86.2257	63.1354	53.2646	24.5737	47.0592	45.7809	43.5573	81.1113	44.3971	64.2639	34.1982	39.1534	49.3206	44.6685	61.394	64.9101	53.5694	43.7912	78.6377	73.112	105.651	107.832	65.1043	73.7395	125.845	128.965	94.5154	104.684	81.6407	122.766	14.3285	117.362	47.7192	117.897	97.3651	253.226	93.7873	73.6795
SEP15	105.141	85.6427	118.994	81.7766	83.7565	103.448	84.086	116.247	73.4138	102.119	123.516	109.732	71.0273	93.7063	106.486	73.9307	67.5131	65.8758	89.0775	77.4809	69.8792	98.31	83.0527	84.6826	116.825	80.6893	90.8741	80.9628	92.6744	53.5406	74.3717	75.2459	93.4268	97.5476	82.69	96.1342	116.787	73.9127	94.5302	40.8203	167.408	100.3	0	68.9277	98.8031	58.4191	71.8127	51.1567	151.31
HS2ST1	473.94	104.392	218.155	100.488	105.471	142.428	136.965	125.473	636.253	103.992	110.722	131.81	63.1354	124.284	122.869	133.811	134.011	85.6746	93.4228	112.644	118.025	176.6	175.597	264.396	207.88	192.076	149.293	113.226	101.84	144.894	221.42	129.415	196.482	227.103	226.802	240.417	167.347	157.721	75.4414	40.8203	78.1235	14.3285	0	143.157	158.206	149.293	57.0738	88.1032	110.868
RP5-1052I5.2	0.11845	0	0	0	0	0	0	0	0	0.749495	0	0.219683	0	0	0	0.464715	0.0860112	0	0.724208	0.183459	0	0.11685	0	0.148892	0	0	0	0	0	0.334629	0	0	0	0	0	0	0	0	0	0	0	0	0	0	0.606154	0	0	0	2.32427
LMO4	11.7373	10.6439	158.658	74.8464	43.4293	20.9894	55.4794	258.327	24.4713	50.0288	4.92097	27.5703	23.6758	99.6246	16.3825	207.154	57.9945	73.9753	93.4228	73.139	36.9154	52.6216	36.7805	30.5974	27.4883	20.1723	519.28	65.1355	89.6192	17.4007	106.083	31.3921	204.808	38.1045	68.1556	64.549	44.4023	27.0883	64.7801	0	22.321	71.6425	0	79.5319	49.7046	136.311	85.9244	51.1567	59.5014
PKN2	180.636	108.65	158.658	203.055	99.267	104.947	169.906	127.318	220.241	153.272	142.708	160.808	193.352	95.6791	229.355	162.24	158.954	123.472	100.665	173.98	138.511	363.521	256.277	160.059	262.857	211.371	103.856	217.321	217.938	250.972	225.958	203.936	214.037	342.288	179.422	247.467	222.491	204.21	129.865	163.281	55.8025	171.942	117.362	217.387	122.14	97.3651	147.859	130.734	129.694
GTF2B	28.7941	29.148	0	106.032	18.6126	59.9697	56.3463	22.1423	24.4713	35.4137	37.8914	29.8769	134.163	71.0195	114.677	38.8447	26.113	97.3739	37.6588	23.1158	34.4197	72.6029	35.594	34.3197	65.2848	79.8122	38.946	50.5256	41.7544	41.1593	25.9869	28.0048	32.9377	44.2013	32.1892	42.8769	46.2496	28.1785	19.5965	122.461	11.1605	42.9855	0	42.417	21.2154	12.982	39.0423	17.0522	21.1509
CCBL2	62.127	25.9548	39.6646	27.0278	46.5314	22.4886	45.077	57.2009	24.4713	48.3424	28.5416	34.1608	15.7838	24.6596	8.19124	37.3549	39.3014	32.5779	40.5556	57.9731	28.8044	44.2473	41.5263	56.7653	46.3865	55.2546	25.964	56.6131	53.9752	48.5212	48.1949	35.734	38.1771	37.6691	44.0137	29.2667	48.781	35.5306	22.338	0	0	14.3285	0	37.1149	32.1262	71.4011	24.3034	22.7363	29.7507
RBMXL1	16.7338	20.551	0	5.54417	3.10209	13.4932	11.2693	42.4394	0	12.1793	7.87354	11.2039	3.94596	10.8502	32.765	19.4497	21.2792	13.6791	27.5199	29.0477	17.6778	11.2176	16.6105	15.1498	6.87208	14.0329	6.49101	12.1749	9.1656	9.70423	25.9093	17.4159	21.829	7.83865	18.6402	22.5643	27.2298	21.5252	14.1135	0	0	0	0	10.6043	19.7	71.4011	25.401	11.3682	11.1565
GBP3	6.84856	2.37441	0	2.07907	24.8167	5.99697	10.4024	0	0	9.55606	0.492097	14.9385	0	6.90468	0	1.66751	0.653685	4.31973	12.3115	24.2166	9.77477	0.740051	8.30527	1.34003	15.4622	5.26235	6.49101	8.5224	12.2208	8.70035	0.401193	0.209442	0.262494	0.870961	0.16423	0.243293	0.410499	0.111819	7.41214	0	0	14.3285	0	5.30213	0	6.49101	0.470389	5.68408	0.929709
GBP1	0.839918	0.327505	19.8323	2.07907	12.4084	0	19.9379	7.38077	0	17.4258	0	10.435	0	37.4825	16.3825	6.05496	2.2707	0.899943	23.1746	6.48222	4.36745	0.2337	0	4.504	5.15406	0	32.455	18.2623	12.2208	3.34629	0.0905919	0.108749	0.041999	0	0	0.0954091	0.0684165	0.0838646	1.01536	0	0	28.657	117.362	5.30213	0.909231	6.49101	1.41117	8.52612	9.06467
GBP2	13.7994	2.62004	39.6646	2.07907	93.0628	2.99848	32.9409	1.84519	0	7.30758	3.93677	2.19683	0	60.1693	8.19124	0.35537	0.229363	6.65958	0	17.6121	0.415948	0.350551	7.1188	2.12172	18.8982	0	6.49101	39.5683	1.0184	1.00389	0.168242	0.26583	0.535487	6.31447	0	0.133573	0.273666	0.0559097	0.101536	0	0	71.6425	117.362	0	0	0	0.156796	8.52612	0.929709
GBP7	0.231516	0.0818764	0	0	0	0	0	0	0	0	0	0.219683	0	0.986382	0	0.0956766	0.349779	0.179989	0	0.366918	0	0.19475	1.18647	4.54122	0	0	0	0.608743	1.0184	0.334629	0.422762	0.455133	0.629985	0	0.328461	0.543832	0.342083	0.279549	1.1169	0	0	0	0	0	0	0	0.470389	0	0
GBP4	0.753773	0.818764	0	1.38604	12.4084	10.4947	7.80179	0	0	4.3096	0	50.4173	0	27.6187	0	1.38048	0.172022	3.05981	1.44842	6.23761	29.9482	0.584251	27.2887	1.07947	8.5901	8.77058	0	10.9574	27.4968	22.0855	0.638457	0.0845822	0.115497	0	0	0.10018	0.136833	0.111819	52.2911	0	0	14.3285	0	0	0	0	1.72476	0	0.929709
GBP5	0.0323045	0.0818764	0	0.693022	65.1439	5.99697	6.06806	0	0	0	0	0.549208	0	23.6732	8.19124	0.273362	0.0516067	0.719955	0	0	0.103987	0.0389501	2.37293	0.186116	25.7703	14.0329	0	10.9574	1.0184	0.334629	0	0	0	0	0	0	0	0	0	0	0	28.657	0	0	0	0	0.470389	0	0
LRRC8B	88.4552	39.5463	0	24.2558	34.123	169.414	31.2072	46.1298	48.9425	26.6071	36.9072	47.1221	0	27.6187	163.825	14.5428	29.4732	24.2985	16.6568	37.3645	45.6503	28.9399	46.2722	5.13679	30.9244	235.928	6.49101	19.4798	19.3496	40.4901	86.5153	29.499	74.7162	21.3385	97.7171	84.4752	431.161	29.8558	20.1042	0	0	14.3285	234.724	21.2085	13.3354	51.928	9.56457	53.9987	3.95126
LRRC8C	23.7761	61.7348	19.8323	6.93022	58.9398	37.481	156.036	59.0461	48.9425	24.546	31.0021	105.228	11.8379	56.2238	8.19124	14.3515	7.89583	105.473	43.4525	3.85264	89.6367	10.0491	70.0015	2.53117	85.901	43.8529	6.49101	192.363	50.92	58.56	16.4187	3.84245	9.88027	254.538	26.359	19.8928	108.44	4.75233	141.44	0	55.8025	85.971	0	116.647	13.9415	32.455	5.80146	93.7873	58.8041
RP11-302M6.4	1.1845	1.88316	0	0	0	2.99848	6.93493	0	0	0.749495	0.492097	2.74604	0	1.97276	0	0.806417	0.510333	3.95975	4.34525	0.61153	2.49569	0.2337	0	0.670016	1.71802	0	0	1.82623	1.0184	1.00389	0.521982	0.604159	0.787481	9.36283	0.821152	1.6315	6.08907	0.92251	3.14762	0	0	0	0	0	0.303077	0	0.627185	2.84204	1.85942
LRRC8D	10.8759	8.76077	0	7.62324	12.4084	34.4826	8.66866	18.4519	0	7.8697	5.41306	1.75747	0	21.7004	0	2.93864	5.72261	7.37953	4.34525	5.93184	2.70366	3.27181	2.37293	12.3209	5.15406	19.2953	6.49101	4.2612	6.1104	1.00389	5.60807	6.54505	9.07179	6.31447	9.03267	14.5594	13.3412	6.51348	7.00599	0	0	0	0	15.9064	3.33385	12.982	3.60631	5.68408	4.18369
ZNF326	54.417	69.8405	39.6646	60.9859	43.4293	53.9727	38.1421	46.1298	48.9425	42.5339	48.2255	33.1722	55.2434	49.3191	73.7212	56.1348	67.5933	30.0581	47.7977	50.757	46.5861	74.4336	72.3745	78.9502	49.8226	60.517	71.4011	31.6546	53.9752	31.7897	68.0863	87.3613	99.6846	37.8868	69.9622	102.379	106.388	94.2918	45.5897	40.8203	11.1605	71.6425	0	26.5106	41.5215	32.455	30.5753	36.9465	26.2643
ZNF644	114.083	141.81	39.6646	110.19	102.369	86.956	164.705	160.532	73.4138	134.16	129.421	130.382	67.0813	160.78	155.634	123.956	143.536	154.07	87.6291	117.72	133.519	194.556	187.462	188.2	219.907	142.083	90.8741	173.492	154.797	142.886	201.947	208.64	202.572	205.765	188.619	210.153	188.898	177.234	155.858	122.461	78.1235	100.3	117.362	164.366	145.174	233.676	126.378	136.418	116.214
HFM1	29.1818	60.0154	0	24.2558	18.6126	25.4871	19.0711	53.5106	48.9425	35.2263	43.3045	16.1467	3.94596	6.90468	24.5737	51.2417	47.094	4.6797	17.381	16.6948	21.5253	27.4209	36.7805	35.9948	10.3081	27.1888	64.9101	14.0011	21.3864	15.0583	116.199	96.4559	92.8913	10.0161	131.713	46.0635	55.349	107.347	22.338	0	0	0	117.362	15.9064	27.2769	58.4191	56.1331	36.9465	17.1996
CDC7	14.3432	22.1066	0	49.2045	24.8167	20.9894	7.80179	49.8202	24.4713	27.1692	15.255	12.1924	43.4056	15.7821	8.19124	35.414	30.534	8.81944	23.1746	13.2702	18.8216	135.897	79.4933	11.7625	70.4388	56.1317	6.49101	18.2623	53.9752	23.0894	42.1382	21.1899	32.8747	13.0644	66.0206	66.2426	59.1119	9.64443	12.0828	122.461	11.1605	14.3285	0	5.30213	26.0646	51.928	4.70389	28.4204	12.3186
TGFBR3	617.491	48.0614	475.975	65.144	356.741	46.4765	97.089	385.645	440.483	290.055	43.7966	604.349	7.89192	104.557	73.7212	136.517	72.0201	8.09949	501.152	46.4763	259.551	6.11516	5.93233	47.5339	149.468	8.77058	64.9101	71.2229	917.578	659.888	13.6362	3.70551	6.55185	0.870961	30.0542	44.537	5.67857	3.4664	29.0393	0	267.852	243.585	0	10.6043	124.565	532.262	29.9481	79.5771	310.29
BRDT	0.516873	0.655011	0	0.693022	0	0	0.866866	1.84519	0	0.187374	1.47629	0.439367	0	0	0	1.2848	1.37618	0.719955	0.724208	1.52883	0.831895	1.2464	1.18647	0.670016	1.71802	0	0	0.608743	2.0368	1.00389	0.910233	1.0754	1.35447	0	0.903267	2.07515	1.71041	1.20206	0.609217	0	0	0	0	0	1.21231	0	0.627185	0	0.464855
EPHX4	1.25449	0.245629	0	0	0	0	0	0	0	0	0.984193	0.768892	0	0	0	0.423711	2.62048	0.539966	0	2.81304	1.5598	0.1558	0	0.223339	0	0	0	0	1.0184	1.00389	1.91537	8.29711	2.70894	0.435481	2.29923	32.7062	7.4574	1.70525	22.4395	0	11.1605	0	0	0	0.303077	0	0.313593	0	0
BTBD8	24.6268	13.264	0	9.00928	15.5105	4.49773	11.2693	3.69038	73.4138	14.8025	13.7787	9.2267	0	2.95915	8.19124	7.83181	10.373	2.15986	6.51787	11.8025	6.23922	5.68671	18.9835	15.3732	13.7442	13.1559	12.982	12.1749	22.4048	14.0544	30.7883	21.649	7.02433	7.62091	21.2678	26.8338	25.8615	18.6179	6.29524	0	0	0	0	21.2085	4.54615	6.49101	3.29272	8.52612	6.27554
KIAA1107	20.578	33.3237	0	2.77209	9.30628	4.49773	6.06806	7.38077	0	13.1162	72.8303	10.8743	0	0.986382	0	4.86584	6.06092	3.95975	3.62104	6.17645	4.7834	2.337	10.6782	8.74743	1.71802	5.26235	12.982	1.21749	15.276	10.0389	29.8608	62.5868	33.1792	11.1048	23.8955	195.732	52.4755	40.7302	22.6426	0	0	0	0	15.9064	7.88	12.982	9.25098	14.2102	4.41612
C1orf146	0.387655	0.491258	0	0	0	0	0	0	0	0	0	0.439367	3.94596	0.986382	16.3825	0.382706	0.315374	0.719955	0	0.672683	0	0.545301	0	0.930578	1.71802	0	0	0.608743	1.0184	0.334629	0.625516	0.8136	0.713983	0.21774	0.574806	2.28028	1.98408	0.698872	0.101536	0	0	0	0	0	0.606154	0	0	0	0.464855
GLMN	38.5555	35.8618	39.6646	20.0976	46.5314	22.4886	32.9409	22.1423	24.4713	38.4116	41.8282	23.2864	0	59.1829	73.7212	46.6355	46.4919	19.2588	46.3493	36.8141	32.132	32.9907	93.7309	23.4506	65.2848	38.5905	38.946	31.6546	77.3984	34.1321	68.5565	65.1645	54.3677	33.0965	65.9385	177.714	94.2096	42.2678	25.2825	0	0	28.657	117.362	31.8128	32.7323	6.49101	21.7947	31.2624	36.4911
RPAP2	100.752	137.061	178.491	43.6604	108.573	41.9788	81.4854	86.724	195.77	101.931	91.0379	73.4841	23.6758	75.9514	90.1037	103.003	111.293	45.7171	76.766	96.4383	82.4616	77.238	145.935	109.324	99.6452	61.394	103.856	75.4841	104.895	93.0268	169.821	171.38	226.375	90.58	188.947	297.137	272.435	175.612	79.2997	40.8203	55.8025	100.3	0	58.3234	116.078	58.4191	110.071	96.6293	91.5764
GFI1	0.0969136	0.0818764	0	0	0	0	0	0	0	0	0	0.109842	0	9.86382	0	0.0546723	0.286704	0	0	0	0	0.19475	5.93233	0.148892	6.87208	0.877058	0	0	0	0.334629	0	0	0	0	0	0	0	0	0	0	0	0	0	0	0	0	0	0	0
EVI5	209.102	49.1258	237.988	74.1533	34.123	41.9788	245.323	182.674	122.356	311.603	110.23	119.398	35.5136	40.4417	106.486	151.784	127.451	187.548	181.776	141.569	100.035	147.893	67.6286	218.388	106.517	67.5334	116.838	399.944	309.594	194.085	216.403	111.802	157.748	356.876	243.636	162.348	173.983	117.103	106.308	0	89.284	28.657	117.362	281.013	114.26	331.041	76.203	113.682	159.445
RPL5	308.573	296.884	218.155	325.027	406.374	277.36	240.122	394.871	195.77	277.313	318.879	210.457	248.595	576.047	229.355	435.534	454.793	298.601	539.535	451.554	318.408	185.13	246.785	360.692	127.133	123.665	564.718	105.312	151.742	66.9257	113.818	133.865	94.2773	99.2896	88.1917	69.2336	69.648	75.7577	271.711	530.664	368.297	329.556	0	281.013	643.432	344.023	1114.35	335.361	269.383
FAM69A	25.9567	221.066	158.658	1.38604	120.982	11.9939	27.7397	31.3683	0	28.4808	8.85774	10.2153	0	80.8834	0	16.347	13.8879	31.138	17.381	14.3098	14.7661	2.96021	2.37293	136.013	182.11	8.77058	38.946	21.306	23.4232	30.7858	30.8962	122.282	135.552	101.249	230.99	181.979	295.628	102.902	17.8704	40.8203	0	42.9855	0	63.6256	19.0939	6.49101	34.4952	34.1045	38.3505
MTF2	113.044	87.6896	138.826	80.3905	99.267	80.9591	69.3493	49.8202	220.241	65.2061	62.0042	84.7978	110.487	109.488	106.486	85.5622	110.794	64.4359	43.4525	104.021	96.2919	145.167	210.005	71.5056	152.904	88.5828	84.3831	93.7464	73.3248	97.3769	107.671	172.926	193.615	93.8461	132.041	185.704	156.605	184.81	75.8475	81.6407	89.284	128.957	0	90.1362	65.4646	45.437	49.7044	59.6828	56.7123
TMED5	78.9092	40.6926	19.8323	45.7394	46.5314	70.4644	71.9499	110.712	24.4713	51.1531	35.4309	48.0008	7.89192	44.3872	49.1475	22.6754	21.8813	46.2571	44.1767	61.6422	25.2688	31.5106	40.3399	129.871	27.4883	35.9594	38.946	63.918	33.6072	27.1049	63.932	20.7549	23.3199	40.282	51.6505	35.5685	38.7922	22.3639	39.396	0	44.642	14.3285	0	42.417	31.52	38.946	31.2025	31.2624	42.0693
CCDC18	26.1021	19.5684	59.4969	60.2929	58.9398	55.4719	60.6806	20.2971	73.4138	33.3525	21.6522	25.2636	35.5136	52.2783	8.19124	19.436	28.2289	40.3175	22.4504	27.8858	26.3087	130.95	151.868	43.8488	125.415	101.739	25.964	76.7016	34.6256	27.7742	43.7041	28.4196	30.6068	56.6125	31.2859	51.082	40.5026	20.6586	13.9105	40.8203	22.321	28.657	0	68.9277	37.8846	25.964	10.6621	65.3669	31.1453
DR1	24.6591	43.3126	59.4969	31.186	31.0209	61.4689	26.8728	35.0586	48.9425	35.4137	34.4468	33.3919	31.5677	49.3191	114.677	24.0558	24.754	31.318	52.8672	19.997	22.0452	29.9916	21.3564	24.5673	32.6424	33.3282	19.473	22.5235	19.3496	14.0544	25.2708	27.3523	32.7277	20.9031	26.8517	36.7898	48.9178	32.2599	49.245	0	22.321	42.9855	234.724	53.0213	52.7354	58.4191	76.987	42.6306	30.6804
FNBP1L	45.6248	201.17	158.658	42.2743	15.5105	158.92	56.3463	66.4269	73.4138	85.8172	43.3045	202.768	78.9192	18.7413	253.929	89.854	141.861	44.2772	64.4545	141.08	186.553	150.776	80.6797	86.1343	73.8749	227.158	77.8921	34.6983	123.226	158.279	305.705	637.693	633.24	125.854	129.003	524.922	770.918	698.173	143.166	81.6407	178.568	71.6425	352.086	84.8341	70.92	103.856	92.9802	323.992	86.2305
BCAR3	76.7933	27.5105	237.988	9.00928	9.30628	2.99848	82.3523	73.8077	122.356	37.6621	41.3361	45.9138	7.89192	6.90468	8.19124	20.4475	116.952	77.7551	21.002	80.722	47.0021	3.89501	9.49173	28.5874	8.5901	3.50823	233.676	112.009	82.4904	77.6339	25.2234	136.125	28.2548	85.3542	9.11479	21.0091	27.2982	17.3041	109.862	0	33.4815	0	0	132.553	100.622	45.437	32.4568	142.102	11.8538
DNTTIP2	19.6627	32.423	19.8323	22.1767	21.7146	20.9894	26.006	16.6067	0	19.8616	18.2076	13.9499	19.7298	40.4417	32.765	15.2536	18.3491	21.2387	21.002	17.6732	19.1336	16.5927	5.93233	10.5714	5.15406	10.5247	0	7.91366	9.1656	9.3696	18.1227	19.1357	21.136	12.1935	16.1767	20.2744	20.7302	18.562	35.3346	0	11.1605	28.657	0	10.6043	27.58	12.982	35.5928	36.9465	15.1078
GCLM	69.2017	29.3117	218.155	161.474	18.6126	74.9621	25.1391	42.4394	73.4138	29.4177	29.0337	35.1493	280.163	13.8094	65.5299	10.7294	13.9568	10.0794	21.7262	12.9644	20.1735	173.717	26.1023	79.1364	27.4883	56.1317	32.455	41.3945	33.6072	35.136	19.309	14.1977	15.7286	3.91932	15.4377	28.8374	43.855	9.84011	42.5436	244.922	22.321	14.3285	0	31.8128	18.4877	6.49101	17.2476	8.52612	24.8697
ABCA4	1.70137	0.90064	0	1.38604	0	0	0.866866	1.84519	0	0.749495	1.96839	3.9543	0	0	0	2.44659	4.09413	0.359977	0	15.1048	3.22359	0.662151	0	3.8712	0	0	0	0.608743	0	6.69257	0.418448	3.08524	0.671984	0	0.16423	1.28802	0.889415	2.46003	4.7722	0	33.4815	0	0	0	0.303077	0	1.41117	2.84204	0.232427
ARHGAP29	5.2441	31.768	39.6646	1.38604	0	4.49773	7.80179	5.53558	0	58.0859	12.3024	541.739	0	0	114.677	102.524	54.5598	3.59977	33.3135	70.8152	515.047	3.81711	7.1188	129.09	8.5901	6.1394	155.784	7.91366	73.3248	426.317	81.4896	40.2611	78.5381	2.39514	2.38134	68.1507	15.3253	17.332	651.558	0	334.815	0	0	10.6043	148.811	12.982	59.269	213.153	32.7723
ABCD3	57.949	35.5343	158.658	27.7209	37.2251	14.9924	27.7397	95.95	24.4713	54.5258	31.4942	35.6986	7.89192	28.6051	90.1037	40.5122	38.8369	21.0587	52.1429	94.3591	31.924	48.7265	43.8993	308.319	39.5145	19.2953	32.455	48.6994	59.0672	37.4784	94.578	54.0118	66.4844	36.3626	71.8508	67.1489	57.2646	50.794	47.8235	81.6407	22.321	14.3285	0	63.6256	46.6739	123.329	29.0073	36.9465	32.3074
F3	10.8274	1.80128	0	2.07907	3.10209	0	2.6006	14.7615	97.885	17.051	17.7155	2.19683	0	0	0	1.91353	5.90037	0.179989	5.06945	20.8532	0.415948	0.467401	0	3.49897	0	0.877058	19.473	3.65246	5.092	0.669257	32.0997	0.95457	1.02898	0.21774	1.0675	0.935009	0.820998	0.587052	14.3166	0	0	0	0	0	2.72769	12.982	1.41117	5.68408	0.929709
SLC44A3	34.8458	2.94755	19.8323	3.46511	6.20418	8.99545	4.33433	31.3683	48.9425	5.80859	41.8282	1.86731	3.94596	0	0	2.99331	19.0027	0	2.89683	103.287	1.14386	0.701101	2.37293	12.6559	0	0.877058	12.982	1.21749	5.092	1.00389	5.39669	9.9807	2.68794	0.435481	0.656922	2.14193	4.31024	0.950465	1.72611	0	11.1605	14.3285	0	0	9.39539	12.982	15.2092	5.68408	1.85942
CNN3	127.145	96.2866	118.994	28.4139	37.2251	19.4901	41.6096	431.775	244.713	152.522	44.7808	246.595	3.94596	1.97276	73.7212	140.481	59.7835	5.21967	175.258	70.326	163.363	10.0491	4.74587	51.1818	3.43604	6.1394	45.437	7.91366	66.196	40.1554	169.088	45.4529	51.3753	5.87899	54.9351	33.1547	20.9355	55.714	152.406	81.6407	189.729	0	0	31.8128	200.94	350.514	334.603	170.522	166.418
ALG14	60.2803	31.2768	59.4969	29.1069	15.5105	14.9924	15.6036	44.2846	48.9425	33.3525	29.0337	22.4077	15.7838	7.89106	0	30.3432	25.9639	11.1593	21.002	18.8963	17.6778	50.674	23.7293	50.2884	20.6162	14.0329	19.473	20.6973	36.6624	23.0894	35.305	27.3603	36.5706	16.1128	33.1745	40.9448	55.2806	23.8735	8.32596	40.8203	11.1605	0	0	15.9064	30.9139	19.473	22.2651	17.0522	20.686
TMEM56	23.2054	13.8371	0	726.287	6.20418	10.4947	10.4024	22.1423	24.4713	13.4909	26.0811	4.61335	749.732	0.986382	0	15.6363	12.8042	0.719955	5.06945	20.5474	0.831895	621.371	84.2391	151.87	37.7964	36.8364	77.8921	43.8295	370.698	20.747	8.32152	71.3713	19.5505	0.653221	7.39037	17.8749	41.5288	13.642	1.82765	530.664	0	14.3285	0	0	9.69846	6.49101	59.1122	8.52612	5.34583
RP11-57H12.6	2.86434	1.14627	0	40.1953	0	1.49924	0	0	0	1.68636	0	0.549208	27.6217	0	0	1.5855	1.43352	0.179989	0	1.65113	0.311961	54.4522	9.49173	19.6166	3.43604	1.75412	0	3.04371	58.0488	0.669257	1.35888	10.0008	3.43342	0	0.985382	3.11034	9.44148	2.12457	0.507681	0	0	0	0	0	1.21231	0	3.13593	2.84204	0.232427
RWDD3	8.61993	4.99446	0	28.4139	3.10209	4.49773	6.93493	3.69038	0	11.9919	5.41306	6.92003	19.7298	1.97276	0	8.9526	6.84649	3.77976	8.69049	8.68373	5.30333	29.3684	10.6782	18.7605	8.5901	9.64763	6.49101	10.9574	44.8096	12.0466	13.0107	10.9312	8.4103	10.2338	13.3027	15.3036	20.1829	6.68121	2.94455	0	11.1605	0	0	0	8.18308	0	6.58544	8.52612	9.52952
RP11-147C23.1	0.290741	1.22815	0	0	0	4.49773	0	0	0	0.187374	0.492097	0.109842	0	0	0	0.150349	0.240831	0	0	0.244612	0.207974	0.0779001	0	0.632793	1.71802	0.877058	0	0	0	0	0.202753	0.112776	0.157496	0	0.246346	0.224211	0.273666	0.139774	0.203072	0	0	0	0	0	0	0	0	0	0
PTBP2	132.519	277.397	59.4969	74.1533	105.471	131.933	104.891	116.247	293.655	183.064	168.297	177.504	102.595	117.38	172.016	235.187	197.665	93.9541	175.258	170.739	206.206	188.752	242.039	144.24	226.779	256.978	123.329	87.659	185.349	212.489	293.285	420.571	484.847	167.878	339.3	291.232	307.053	454.267	100.216	204.102	167.408	71.6425	0	79.5319	133.354	155.784	86.8651	139.26	162.467
DPYD	40.203	246.202	19.8323	54.7487	248.167	49.475	792.315	25.8327	73.4138	346.267	731.255	29.6573	47.3515	229.827	106.486	57.0779	45.8268	344.318	174.534	183.153	6.23922	124.251	275.26	1572.9	410.607	149.977	493.316	700.054	209.79	113.104	23.6919	32.9911	67.1879	31.1369	101.577	25.5124	22.509	334.424	14.4181	81.6407	11.1605	386.87	0	673.37	42.4308	71.4011	17.5612	79.5771	400.24
SNX7	12.3403	27.2648	19.8323	1.38604	6.20418	0	6.06806	42.4394	0	25.8576	23.1285	20.4306	0	0.986382	0	10.0734	15.3788	3.59977	26.0715	18.2236	19.6535	1.558	2.37293	32.9425	1.71802	1.75412	6.49101	4.86994	17.3128	29.1127	61.7708	4.79702	8.98779	25.9111	80.2266	6.83606	22.8511	5.17165	16.3473	40.8203	0	0	0	0	26.9739	71.4011	20.6971	39.7885	40.9072
LPPR5	1.40525	39.1369	0	0.693022	3.10209	0	0.866866	0	0	1.87374	88.5774	0.878734	0	0	0	0.697072	5.53912	0.359977	2.17262	0.366918	0.103987	1.0127	2.37293	2.71729	0	1.75412	0	0	0	1.67314	14.2272	22.9822	83.8195	1.0887	183.445	45.9586	90.5151	38.6616	3.35069	0	0	0	0	0	0.606154	0	3.29272	2.84204	31.6101
LPPR4	1.6906	76.3906	0	0	0	0	0.866866	3.69038	24.4713	4.49697	44.2887	0.878734	0	0	0	0.205021	5.75702	0.719955	9.4147	0.672683	0.207974	1.05165	3.5594	4.80178	0	0.877058	0	0	1.0184	1.00389	9.46039	21.8786	151.532	1.52418	41.9609	99.2159	265.73	78.9445	5.48295	0	0	14.3285	0	0	2.42462	12.982	7.52622	34.1045	74.3767
PALMD	30.0055	3.93007	59.4969	4.15813	3.10209	0	5.2012	11.0712	24.4713	5.62121	2.46048	8.67749	0	0	0	1.61283	0.665153	0	5.79366	4.89224	9.25484	4.36241	0	222.929	1.71802	1.75412	19.473	6.08743	6.1104	25.4318	17.8725	3.6169	3.14993	1.0887	0.656922	1.19738	8.82573	5.73075	251.404	0	11.1605	0	0	0	18.4877	19.473	149.74	11.3682	8.83224
FRRS1	19.1297	0.736887	19.8323	24.2558	6.20418	17.9909	6.93493	0	0	9.93081	0.984193	1.75747	15.7838	5.91829	0	3.36235	6.50818	6.83957	2.89683	22.6266	2.3917	40.7418	11.8647	71.9523	3.43604	31.5741	0	25.5672	3.0552	2.3424	1.8938	0.76124	0.671984	17.2015	0.574806	2.22303	2.25775	0.810691	5.58449	0	0	0	0	10.6043	0.303077	0	3.76311	5.68408	5.34583
AGL	59.8442	30.0486	19.8323	32.572	27.9188	25.4871	32.074	29.5231	0	31.6662	20.6681	16.3664	3.94596	15.7821	0	32.4754	41.3255	14.9391	31.8651	38.6487	11.0226	28.0441	46.2722	71.729	30.9244	35.0823	25.964	28.6109	26.4784	18.7392	53.9324	35.734	70.6738	17.2015	38.2657	62.2067	106.046	52.8906	50.8696	0	0	71.6425	0	47.7192	31.8231	64.9101	915.533	25.5784	23.0103
SLC35A3	31.5723	18.0947	19.8323	25.6418	21.7146	46.4765	26.8728	36.9038	24.4713	36.9126	25.0969	29.4376	31.5677	38.4689	32.765	25.737	27.9479	31.138	33.3135	45.2532	32.028	53.1669	39.1534	56.4675	30.9244	46.484	51.928	29.8284	36.6624	36.4745	48.0569	31.8633	59.8066	28.9595	55.0172	85.768	95.8516	41.2893	40.2083	40.8203	44.642	28.657	0	31.8128	30.6108	19.473	17.4044	22.7363	26.7291
HIAT1	65.2875	63.0448	19.8323	58.9069	46.5314	77.9606	45.9439	77.4981	73.4138	67.8293	68.8935	72.9349	122.325	88.7744	73.7212	66.1809	69.2849	54.3566	63.0061	65.8618	60.0005	86.7808	55.7639	53.5269	61.8487	68.4105	77.8921	37.742	52.9568	59.8985	81.8735	71.6532	72.0808	58.5721	70.9475	99.8456	116.65	60.5502	71.6845	0	55.8025	42.9855	0	95.4383	60.6154	45.437	46.0981	76.7351	72.7497
SASS6	9.37909	18.4222	19.8323	27.7209	12.4084	29.9848	14.7367	11.0712	24.4713	8.43182	9.84193	9.33654	71.0273	17.7549	16.3825	9.8957	19.0257	9.5394	12.3115	13.9429	9.98274	79.6919	33.2211	10.7203	37.7964	32.4511	0	9.73988	5.092	18.0699	21.1554	13.9238	14.0592	13.9354	16.0946	13.8343	17.3778	12.4399	6.49831	40.8203	11.1605	0	0	15.9064	18.1846	32.455	7.83981	14.2102	11.3889
TRMT13	27.7819	22.3522	0	19.4046	21.7146	20.9894	18.2042	20.2971	0	27.7313	20.176	22.8471	7.89192	11.8366	0	20.1468	16.193	10.0794	26.7957	15.2883	18.9256	34.2371	36.7805	28.4385	24.0523	20.1723	12.982	27.3934	22.4048	23.0894	34.0755	31.2189	41.9885	22.2095	38.6763	55.7953	50.7651	32.7072	13.0982	0	11.1605	0	0	26.5106	20.3062	6.49101	22.7355	36.9465	27.6589
LRRC39	28.1157	3.60256	0	2.07907	0	1.49924	6.06806	5.53558	24.4713	5.05909	5.41306	3.9543	0	1.97276	8.19124	3.71772	3.73289	2.51984	5.06945	3.30226	2.28771	3.07706	0	3.42453	0	4.38529	0	8.5224	2.0368	14.389	6.44065	7.14518	10.7517	222.095	5.66595	18.6	20.2513	8.69396	2.13226	0	0	0	0	42.417	6.97077	0	228.295	8.52612	3.95126
DBT	52.9741	48.0614	19.8323	43.6604	49.6335	29.9848	33.8078	70.1173	48.9425	49.8414	36.4151	35.6986	39.4596	14.7957	8.19124	32.9538	39.1695	19.7988	59.385	47.944	36.2914	45.0263	28.4752	84.6454	24.0523	42.9758	45.437	44.4382	29.5336	26.7703	45.9646	35.8467	40.5605	25.0401	35.0632	47.3897	54.5964	36.537	36.6546	0	22.321	0	0	10.6043	36.9754	58.4191	43.5894	42.6306	33.0047
RTCA	24.7884	19.2409	39.6646	25.6418	24.8167	40.4795	38.1421	14.7615	24.4713	25.8576	22.6364	24.3849	19.7298	16.7685	24.5737	17.2081	17.0532	18.5388	23.8989	15.4106	15.806	35.0551	36.7805	24.7906	46.3865	26.3117	19.473	34.6983	17.3128	41.1593	19.9216	23.4897	22.3015	39.8465	19.4613	36.8613	41.5973	21.7209	16.4489	40.8203	0	71.6425	0	26.5106	13.9415	19.473	24.4602	22.7363	20.686
CDC14A	19.162	13.4277	99.1615	50.5906	161.309	83.9575	65.8818	40.5942	24.4713	76.6359	24.6048	62.3901	15.7838	219.963	163.825	94.7472	113.409	99.8937	91.2502	68.8583	97.8517	50.1677	122.206	40.9082	176.956	148.223	58.4191	80.9628	85.5456	87.0035	83.4308	14.1293	16.6001	119.539	104.451	3.49197	15.6674	15.5149	64.1708	0	33.4815	128.957	0	153.762	38.4908	25.964	33.5544	45.4726	54.8528
VCAM1	76.3626	11.2989	0	18.0186	18.6126	2.99848	119.628	36.9038	0	31.6662	9.34983	12.522	0	0	0	16.265	0.510333	0.539966	20.2778	0.672683	2.59967	4.75191	5.93233	132.03	5.15406	3.50823	6.49101	409.684	14.2576	13.7198	25.2449	0.652491	0.598486	0.870961	0.492691	0.815748	0.820998	1.03433	1.52304	0	11.1605	0	0	10.6043	0	0	2.66554	28.4204	19.5239
EXTL2	105.921	47.0789	99.1615	22.1767	40.3272	28.4856	35.5415	64.5817	122.356	65.0187	31.9863	37.0167	3.94596	9.86382	8.19124	49.7108	24.6107	5.93963	65.1787	20.7309	18.1977	17.956	22.5429	30.6346	13.7442	32.4511	25.964	16.4361	33.6072	15.0583	56.4301	29.2614	44.8759	16.1128	49.187	30.4928	64.5852	25.6905	28.3286	81.6407	66.963	14.3285	0	31.8128	60.3123	19.473	25.7146	51.1567	82.0468
SLC30A7	101.28	46.9152	118.994	59.5999	65.1439	79.4598	74.5505	64.5817	122.356	90.6889	80.7038	68.3215	31.5677	57.2102	40.9562	52.5401	43.4299	36.8977	87.6291	48.1886	57.4008	64.2676	68.8151	53.713	37.7964	63.1481	51.928	58.4393	63.1408	64.5833	65.3383	57.0084	82.3601	68.5882	74.6427	65.9468	94.4832	62.4512	62.3432	0	89.284	128.957	0	31.8128	49.4015	32.455	28.3801	42.6306	92.7385
DPH5	26.0805	17.6034	0	14.5535	12.4084	7.49621	23.4054	5.53558	0	20.2364	21.6522	9.2267	3.94596	17.7549	8.19124	17.7138	15.5795	7.01956	13.0357	13.6983	9.25484	21.1888	23.7293	20.361	12.0261	16.6641	6.49101	18.871	15.276	10.7081	24.9042	15.5792	19.8025	11.3225	23.8955	21.8058	23.7405	14.6204	10.6613	0	11.1605	14.3285	0	10.6043	25.4585	32.455	32.9272	11.3682	19.059
AC093157.1	0.296125	0	0	0.693022	3.10209	4.49773	0.866866	0	0	0.374748	0	0.329525	0	0	0	0.35537	0.430056	0.179989	0.724208	0.672683	1.5598	0.389501	0	0.409454	6.87208	0.877058	0	0	1.0184	0.334629	0.258834	0.322218	0.388491	1.74192	0.246346	0.300539	0.547332	0.0838646	0.203072	0	0	0	0	0	0.606154	0	0.156796	0	0.697282
S1PR1	27.1197	7.36887	0	6.93022	34.123	1.49924	9.53553	7.38077	0	9.18132	4.92097	97.7591	0	20.714	0	0.724409	0.865846	2.33985	0.724208	2.56843	35.1476	1.28535	2.37293	9.56634	3.43604	0	0	6.08743	2.0368	18.7392	83.0642	2.02594	3.10793	3.04836	2.46346	1.98451	1.57358	3.63413	75.1368	0	44.642	14.3285	0	5.30213	0.606154	6.49101	4.0767	2.84204	1.62699
OLFM3	7.18776	42.9851	0	2.07907	3.10209	1.49924	1.73373	0	0	1.87374	69.8777	0.768892	7.89192	0	0	2.15956	26.9158	0.899943	2.17262	0.856142	1.87176	1.20745	1.18647	2.49395	3.43604	2.63117	19.473	1.82623	1.0184	2.3424	11.4836	267.928	1300.32	3.2661	44.3422	298.807	587.219	400.677	17.4642	0	0	0	0	0	0.909231	0	5.95826	0	0.697282
COL11A1	154.518	9.66141	19.8323	6.2372	24.8167	10.4947	17.3373	153.151	269.184	108.864	9.34983	9.11686	11.8379	0	8.19124	12.2329	2.70649	0.719955	65.1787	4.40302	1.5598	1.9475	3.5594	3.83398	0	8.77058	441.388	3.65246	30.552	2.00777	108.594	68.7653	56.6672	1.74192	721.793	9.9464	38.108	23.7896	5.38142	40.8203	0	0	117.362	5.30213	10.0015	19.473	11.6029	42.6306	47.4152
RNPC3	40.0307	29.0661	19.8323	42.2743	15.5105	20.9894	42.4764	11.0712	24.4713	32.603	39.3677	29.4376	39.4596	10.8502	8.19124	20.2014	30.7461	23.0385	21.002	34.3068	22.9811	59.9442	75.9339	36.5159	58.4127	39.4676	51.928	59.048	44.8096	53.5406	47.9576	47.2331	57.8956	33.532	50.0082	82.7006	77.7896	49.3962	24.7748	0	44.642	71.6425	0	58.3234	23.9431	32.455	29.1641	42.6306	19.059
AMY2B	14.2194	12.609	0	6.93022	9.30628	1.49924	13.003	1.84519	0	8.6192	13.2866	4.72319	0	3.94553	0	2.30991	5.45311	2.69983	3.62104	9.41756	2.80765	5.45301	13.0511	13.9587	6.87208	2.63117	38.946	10.9574	9.1656	8.03109	16.4877	19.4781	32.4547	8.49187	10.9213	39.5471	62.8748	25.2992	5.07681	0	22.321	28.657	0	10.6043	4.24308	0	15.8364	11.3682	3.95126
PRMT6	7.09623	13.8371	0	5.54417	3.10209	4.49773	6.93493	14.7615	0	6.18334	22.1443	4.39367	0	5.91829	0	3.12999	5.71114	3.05981	4.34525	6.66568	3.11961	3.07706	2.37293	6.51405	1.71802	6.1394	6.49101	2.43497	2.0368	2.3424	3.82643	2.48108	2.95043	1.74192	4.35211	3.18666	3.42083	3.38254	6.90446	0	11.1605	0	0	0	6.36462	6.49101	6.89904	0	9.06467
NTNG1	1.97596	133.868	0	2.07907	3.10209	1.49924	2.6006	1.84519	24.4713	104.555	464.047	1.20826	0	1.97276	0	7.05273	25.2357	3.41978	224.504	36.8141	1.45582	1.36325	1.18647	3.20119	15.4622	2.63117	395.951	0.608743	2.0368	1.00389	285.723	26.4501	43.196	10.0161	880.932	27.9835	360.624	12.4679	30.4608	40.8203	22.321	0	0	0	3.03077	12.982	12.5437	19.8943	450.677
VAV3	7.32775	4.58508	436.311	58.9069	235.759	301.348	220.184	1.84519	0	16.8636	2.95258	372.144	15.7838	129.216	180.207	3.59471	89.4459	169.009	12.3115	137.35	245.305	32.2507	552.893	8.30076	427.787	555.177	6.49101	232.54	34.6256	616.721	39.5714	5.12326	120.873	13.2822	59.862	334.156	194.85	10.0638	28.3286	0	401.778	358.213	586.81	159.064	62.7369	12.982	21.0107	2.84204	4.41612
SLC25A24	20.858	40.9382	0	6.2372	0	20.9894	52.8788	35.0586	0	45.5318	25.589	61.2917	0	13.8094	57.3387	34.9083	23.0682	17.0989	46.3493	30.4542	32.132	2.0254	16.6105	5.88125	20.6162	10.5247	45.437	29.8284	41.7544	63.9141	31.3664	32.0083	25.9974	31.5723	19.8719	71.9051	56.4436	31.5051	37.2638	0	22.321	14.3285	0	42.417	52.7354	32.455	79.6525	56.8408	39.0478
FAM102B	7.64002	68.2849	39.6646	23.5627	49.6335	74.9621	113.559	22.1423	0	74.7622	25.589	26.2522	27.6217	51.2919	49.1475	100.009	16.4339	126.892	62.2819	29.17	26.1007	70.188	54.5775	20.1749	104.799	81.5663	51.928	174.1	105.914	91.6883	66.6325	47.3701	49.1703	221.224	51.8147	87.9529	84.6997	42.2118	16.9565	0	0	28.657	0	159.064	17.2754	12.982	12.0733	39.7885	62.2905
HENMT1	2.03519	4.25757	0	4.85115	6.20418	4.49773	4.33433	0	0	3.18535	2.46048	1.97715	7.89192	4.93191	0	3.74506	1.51953	2.15986	9.4147	2.20151	0.623922	3.19391	9.49173	1.71226	5.15406	5.26235	0	4.2612	1.0184	0.669257	2.05773	5.3609	4.74589	3.91932	1.47807	9.96548	10.1256	4.10936	1.42151	0	0	14.3285	0	5.30213	5.75846	0	10.5054	0	2.09185
PRPF38B	37.8502	39.9557	19.8323	56.1348	52.7356	74.9621	77.1511	46.1298	24.4713	41.0349	36.4151	29.4376	51.2975	51.2919	57.3387	37.3549	36.3197	40.4974	27.5199	37.4868	36.8114	72.1355	54.5775	36.2925	42.9505	43.8529	32.455	74.8754	48.8832	30.1166	43.0398	30.2643	46.0519	66.4108	35.1453	32.4009	33.7978	27.7592	43.9652	122.461	44.642	71.6425	0	68.9277	43.34	12.982	38.2583	28.4204	30.6804
FNDC7	0.26382	0.0818764	0	0	0	1.49924	0	0	0	0.187374	0.492097	0.439367	0	0	0	0.369038	0.676622	0.719955	1.44842	0.672683	0.727908	0.311601	0	0.223339	0	0	0	1.82623	2.0368	0.334629	6.28967	0.326246	4.2734	0.435481	0.0821152	0.505668	0.684165	0.475233	0.101536	0	0	0	0	0	0	0	0	0	0
STXBP3	36.1596	26.2823	59.4969	87.3207	46.5314	38.9803	54.6126	42.4394	97.885	46.4687	36.4151	41.5202	71.0273	26.6323	32.765	30.3021	42.4895	43.0173	38.383	54.0593	34.7316	53.2448	65.2557	34.0592	34.3604	57.8858	71.4011	53.5694	61.104	50.1943	88.8362	19.329	39.5631	67.935	51.322	33.4266	37.3554	18.3104	44.2698	81.6407	33.4815	28.657	117.362	31.8128	35.7631	32.455	27.9097	42.6306	35.7938
AKNAD1	23.3616	19.1591	19.8323	21.4837	3.10209	22.4886	13.8699	31.3683	24.4713	17.9879	20.176	12.1924	11.8379	2.95915	0	15.6773	13.6815	9.89938	22.4504	11.0687	12.7904	25.5902	15.4241	17.1599	20.6162	14.0329	19.473	14.0011	18.3312	21.0816	36.8321	29.1043	44.8759	11.5402	31.2859	56.5442	55.1437	29.3806	9.64593	40.8203	0	14.3285	0	10.6043	20.3062	12.982	13.9549	11.3682	28.1237
GPSM2	30.8939	58.7872	178.491	59.5999	18.6126	29.9848	19.9379	62.7365	73.4138	24.3586	12.7945	19.1125	47.3515	10.8502	0	20.0237	18.5899	12.7792	30.4167	15.7163	14.8701	102.244	78.3068	14.4053	44.6685	34.2052	12.982	13.3923	28.5152	15.3929	128.727	24.4483	31.3838	21.5563	190.343	11.5827	21.0723	19.4845	13.9105	40.8203	0	0	0	21.2085	56.0692	84.3831	47.9797	25.5784	102.268
CLCC1	55.2569	44.2951	79.3292	39.5022	27.9188	68.9651	35.5415	35.0586	0	51.7152	58.5595	29.8769	15.7838	16.7685	32.765	42.3711	31.1705	27.8982	31.1409	30.76	33.7957	69.0974	42.7128	45.3378	60.1307	61.394	45.437	45.6557	36.6624	37.813	56.7709	51.1601	65.0145	42.0239	56.9058	81.1645	68.4165	49.3124	27.6178	40.8203	22.321	42.9855	117.362	15.9064	43.34	38.946	28.8505	45.4726	59.269
WDR47	14.5963	56.3309	0	12.4744	9.30628	28.4856	19.9379	14.7615	0	16.1141	31.4942	17.355	19.7298	18.7413	8.19124	15.3083	19.278	19.0788	12.3115	19.9359	29.2203	20.7993	35.594	17.4949	36.0784	28.9429	6.49101	32.2634	21.3864	33.4629	85.5662	87.4942	90.2874	23.2982	40.9755	130.186	142.375	90.7694	22.338	0	11.1605	14.3285	0	47.7192	16.6692	25.964	18.8156	28.4204	15.8051
TAF13	23.9969	19.3228	0	20.0976	3.10209	20.9894	24.2722	27.6779	0	19.6743	16.7313	20.8699	7.89192	28.6051	24.5737	23.2904	11.795	26.0984	30.4167	17.6121	27.3486	12.8146	1.18647	15.2243	10.3081	7.01646	19.473	9.13114	10.184	12.7159	14.4731	12.1033	13.0407	8.49187	10.5929	12.2124	15.9411	10.9304	25.6886	0	33.4815	14.3285	0	10.6043	16.9723	0	33.3976	11.3682	21.6157
TMEM167B	37.4302	30.7036	39.6646	18.0186	21.7146	19.4901	20.8048	42.4394	24.4713	26.9818	32.9705	24.4947	23.6758	17.7549	8.19124	13.094	8.96237	15.839	51.4187	12.0471	13.4143	8.91957	7.1188	18.016	3.43604	11.4017	6.49101	10.9574	6.1104	5.01943	14.2531	12.3852	14.9516	9.79831	9.93594	29.8297	24.6984	14.3968	23.5564	0	0	14.3285	0	15.9064	27.58	32.455	42.9622	17.0522	33.2371
C1orf194	0.247668	0.163753	0	0	0	0	0	0	0	0	1.47629	0.219683	0	0	0	0.218689	0.384183	0.359977	0	0.122306	0.103987	0.0389501	1.18647	0.0744462	0	0.877058	0	0	0	0.334629	1.98871	0.386661	1.12347	0.21774	0.16423	1.11629	0.957831	0.726826	0.507681	0	0	0	0	0	0	0	0	0	0
KIAA1324	3.61272	5.64947	0	0	3.10209	4.49773	1.73373	9.22596	0	2.43586	123.024	1.42794	0	5.91829	8.19124	3.37602	3.84757	2.33985	2.89683	3.97495	2.49569	2.80441	1.18647	23.3389	8.5901	1.75412	0	2.43497	4.0736	1.00389	10.815	19.4177	44.162	1.95966	5.09114	41.8464	59.6592	8.16282	1.82765	0	0	14.3285	0	0	3.33385	6.49101	1.41117	0	2.5567
SARS	37.9901	75.2444	59.4969	42.2743	18.6126	46.4765	33.8078	46.1298	0	38.4116	64.9567	36.3576	78.9192	47.3464	16.3825	36.1794	32.1051	22.6786	35.4862	34.4291	34.3157	43.702	20.1699	40.0149	36.0784	33.3282	32.455	31.6546	28.5152	18.0699	33.5104	51.2568	58.7776	17.4192	39.4974	60.1173	59.9329	45.7062	50.7681	40.8203	33.4815	42.9855	0	31.8128	39.4	45.437	45.7845	51.1567	30.6804
CELSR2	2.58975	54.1203	0	2.77209	0	5.99697	2.6006	70.1173	0	5.99596	41.3361	1.09842	7.89192	14.7957	0	1.25746	27.0419	4.6797	0	30.0261	1.76778	4.28451	1.18647	4.9879	6.87208	3.50823	19.473	3.65246	6.1104	1.67314	66.3651	102.385	131.572	14.5886	65.6922	76.8091	53.8438	45.231	12.5905	0	0	0	0	15.9064	13.3354	38.946	7.99661	17.0522	4.64855
PSRC1	2.68128	7.04137	0	1.38604	0	11.9939	3.46746	5.53558	0	6.93283	1.96839	7.79876	0	5.91829	0	3.36235	6.77195	2.69983	4.34525	3.66918	2.18373	2.92126	2.37293	2.15894	3.43604	7.89352	6.49101	4.2612	3.0552	3.68092	8.14896	3.46384	1.00798	2.83062	3.03826	0.83483	0.752582	1.53752	4.97527	0	0	0	0	15.9064	17.8815	0	2.82233	5.68408	8.59981
MYBPHL	0.59225	0.491258	0	0	0	0	0	0	0	0.374748	0	0	0	0	0	0.0546723	0.223629	0	0	0.061153	0.311961	0.0779001	0	0.223339	0	0.877058	0	0	0	0	0.33217	2.43274	0.598486	0	0.16423	1.66489	1.36833	1.11819	0.304608	0	0	0	0	0	1.21231	0	0.627185	0	0
SORT1	43.9019	62.7992	59.4969	12.4744	12.4084	164.917	94.4884	88.5692	0	55.65	34.4468	14.2794	3.94596	2.95915	73.7212	11.8229	50.1675	67.4957	20.2778	55.0377	32.028	4.71296	14.2376	48.9112	17.1802	188.567	38.946	41.3945	80.4536	8.36572	67.9008	117.356	103.055	147.41	72.3435	74.7244	76.216	73.4654	182.054	0	11.1605	0	469.448	42.417	51.22	97.3651	83.886	93.7873	19.9887
PSMA5	71.6407	40.6926	99.1615	47.8185	31.0209	59.9697	41.6096	29.5231	48.9425	45.5318	40.844	40.971	35.5136	52.2783	8.19124	19.6957	24.8916	22.6786	22.4504	25.6843	25.4768	45.5716	32.0346	57.4353	56.6947	42.9758	51.928	31.6546	18.3312	27.4396	24.8394	22.7526	26.1024	19.5966	22.4174	31.4278	31.4032	21.7209	38.5837	0	33.4815	28.657	0	15.9064	34.2477	25.964	59.5826	34.1045	29.5183
SYPL2	16.9922	1.80128	0	0.693022	0	1.49924	1.73373	5.53558	24.4713	5.80859	0.984193	2.19683	0	0	0	0.136681	2.00693	0	4.34525	0.061153	0	0.19475	0	3.75954	0	0	6.49101	0.608743	0	0	1.06122	0.149026	0.0944978	0.870961	0	0.114491	0.0684165	0.0559097	0.203072	0	0	0	0	0	3.63692	12.982	228.139	2.84204	1.39456
ATXN7L2	13.0887	4.66695	0	4.15813	6.20418	1.49924	4.33433	3.69038	0	6.37071	6.88935	1.75747	0	1.97276	8.19124	4.20977	5.22948	2.51984	4.34525	1.28421	1.14386	2.64861	2.37293	2.5684	6.87208	0	12.982	1.82623	1.0184	1.33851	4.74961	5.71131	8.76729	1.30644	1.56019	10.2326	14.5043	5.87052	2.2338	0	0	0	0	0	2.42462	0	23.6762	0	6.27554
CYB561D1	10.9997	7.12324	19.8323	4.85115	18.6126	7.49621	5.2012	9.22596	24.4713	5.80859	8.36564	2.85588	0	10.8502	0	3.48536	3.49206	2.51984	2.17262	3.48572	3.9515	4.79086	2.37293	4.65289	13.7442	7.01646	12.982	5.47868	1.0184	1.67314	5.52179	4.74466	5.99536	5.00803	1.39596	9.3644	14.9148	4.36096	3.55377	0	11.1605	0	0	5.30213	10.0015	0	9.56457	5.68408	6.74039
AMIGO1	6.58474	4.91258	0	2.07907	9.30628	1.49924	0.866866	1.84519	48.9425	3.37273	3.44468	1.86731	0	0.986382	0	0.92943	3.89344	0	2.17262	1.34537	0	0.467401	1.18647	2.12172	0	0	6.49101	0	0	0	6.734	6.32353	12.8412	0	2.135	12.9566	15.3937	8.97351	3.04608	0	0	0	0	0	23.3369	0	15.2092	0	5.57826
GNAI3	36.208	46.0145	19.8323	58.9069	21.7146	29.9848	63.2812	40.5942	48.9425	44.7823	39.8598	44.9253	15.7838	52.2783	57.3387	58.0757	26.6463	57.9563	96.3196	53.937	55.841	47.9086	37.9669	39.0098	30.9244	27.1888	19.473	83.3978	52.9568	43.5017	49.4546	45.4327	40.8965	44.6368	32.107	66.8198	73.3425	41.5409	49.5496	122.461	22.321	14.3285	117.362	58.3234	45.1585	38.946	29.7913	22.7363	52.0637
GNAT2	0.242284	0	0	0	0	0	0.866866	0	0	0	0.492097	0	0	0	0	0.0136681	0.0458726	0.359977	0	0.122306	0.103987	0	0	0.297785	0	0	0	0	0	0.334629	0.142359	0.128887	0.041999	0.21774	0.0821152	0.286227	0.410499	0.0279549	0.203072	0	0	0	0	0	0	0	0	0	0
AMPD2	12.5503	14.6559	19.8323	6.93022	12.4084	19.4901	13.003	9.22596	24.4713	10.3056	46.2571	5.05272	3.94596	15.7821	0	8.97993	5.27535	5.39966	13.0357	7.09375	3.84752	5.45301	22.5429	17.7554	3.43604	23.6806	19.473	20.6973	9.1656	5.01943	8.17053	4.32577	6.16335	2.39514	5.74806	7.74245	10.8098	3.63413	9.34133	0	11.1605	28.657	117.362	5.30213	13.0323	12.982	5.17428	11.3682	15.5726
GSTM4	11.4896	9.66141	0	13.8604	6.20418	34.4826	12.1361	5.53558	24.4713	8.05707	12.3024	3.29525	0	10.8502	16.3825	7.57212	6.16987	13.1392	12.3115	10.0291	2.3917	2.72651	2.37293	17.2343	0	14.91	19.473	6.69617	4.0736	1.33851	8.26112	1.38554	2.23645	11.5402	5.17326	1.2594	2.80508	2.48798	8.63057	0	11.1605	0	0	5.30213	5.45539	0	16.6204	25.5784	13.2484
GSTM2	2.06211	1.31002	0	1.38604	6.20418	4.49773	0.866866	0	0	9.36869	2.46048	0.65905	0	0.986382	0	8.61089	4.57006	2.15986	5.06945	4.95339	1.5598	1.51905	4.74587	3.0523	5.15406	3.50823	19.473	0.608743	4.0736	2.3424	11.8762	1.04721	1.12347	6.53221	6.65133	5.70547	2.39458	0.838646	1.01536	0	0	14.3285	0	5.30213	3.94	12.982	2.19515	2.84204	9.29709
GSTM1	0.150755	0	0	0.693022	0	0	0	0	0	0.374748	1.47629	0.109842	0	0	0	1.77685	1.23856	0.179989	0	1.40652	0.623922	0.19475	0	0.186116	0	0	0	0	0	1.00389	1.1475	0.17722	0.041999	0	1.0675	0.252834	0.136833	0.223639	0.203072	0	0	0	0	0	0	0	0.156796	2.84204	1.16214
GSTM5	0.452264	4.42132	0	2.07907	0	7.49621	0	5.53558	0	14.6152	1.96839	1.09842	0	0	32.765	26.2701	3.00466	1.43991	23.8989	14.5544	2.07974	0.856902	9.49173	0.930578	1.71802	6.1394	0	0	10.184	1.33851	15.53	1.70775	1.24947	0.870961	2.05288	1.87956	1.91566	2.43207	6.19371	0	22.321	0	0	0	6.36462	0	3.91991	8.52612	19.7563
GSTM3	8.12998	34.3881	0	44.3534	3.10209	8.99545	4.33433	23.9875	0	21.7354	25.0969	3.40509	0	7.89106	0	22.074	9.74794	3.2398	37.6588	69.4698	4.26346	2.337	2.37293	10.5341	1.71802	0.877058	45.437	0.608743	6.1104	2.67703	15.8795	11.1367	14.9306	4.79029	11.6604	33.1738	28.9402	15.8504	11.4736	0	22.321	0	0	0	6.97077	19.473	16.3068	8.52612	22.5454
CSF1	4.17805	3.19318	0	7.62324	6.20418	5.99697	7.80179	27.6779	0	63.3324	0.492097	14.4991	0	3.94553	0	11.9322	2.33951	5.03968	31.8651	0.856142	10.2947	5.68671	3.5594	5.4718	1.71802	5.26235	12.982	2.43497	54.9936	42.4978	11.3154	0.434994	0.881979	184.644	1.47807	0.558143	0.478916	0.782736	8.32596	0	22.321	0	0	5.30213	5.75846	6.49101	4.2335	34.1045	48.5773
AHCYL1	118.773	83.7595	99.1615	56.8278	99.267	86.956	68.4824	119.937	171.299	100.432	110.722	73.4841	55.2434	50.3055	73.7212	72.7552	70.1679	38.1576	84.7323	61.7645	52.2014	38.0542	37.9669	67.4111	44.6685	36.8364	71.4011	30.4371	50.92	35.8053	116.79	70.457	79.1576	70.5478	60.1083	69.0714	89.4888	73.0181	90.7733	81.6407	44.642	28.657	0	42.417	83.3462	71.4011	49.0772	59.6828	72.7497
STRIP1	15.8023	27.3467	19.8323	11.7814	0	10.4947	17.3373	7.38077	24.4713	15.3647	18.6997	14.8286	7.89192	13.8094	40.9562	23.0444	18.7791	8.09949	18.1052	17.4286	15.806	21.1499	21.3564	16.676	5.15406	9.64763	19.473	18.2623	18.3312	27.4396	26.1509	47.4426	40.0671	17.4192	28.7403	55.7714	59.5224	36.1456	15.535	0	22.321	0	0	5.30213	12.1231	12.982	14.1117	19.8943	13.0159
ALX3	0.360734	3.84819	0	0.693022	0	0	0	5.53558	0	0.187374	0	0.109842	0	0	0	0.218689	0.114682	0.359977	0	0.183459	0.311961	0.1558	0	0.148892	0	0	0	0	0	0	0.211381	0.31819	0.230995	0	0	0.305309	0.342083	0.251594	0.304608	0	0	0	0	0	0	0	0	0	0
SLC6A17	1.29757	5.48572	0	0	0	0	0	0	0	0.562121	37.3993	0.768892	0	0	0	0.218689	0.430056	0.179989	0	0.672683	1.14386	0.584251	1.18647	0.818909	0	1.75412	0	0	0	0.334629	2.41578	8.95766	17.8496	0.870961	1.72442	89.8181	84.0839	9.02942	2.43687	0	0	0	0	0	0.909231	0	3.29272	0	0.464855
KCNC4	1.55062	28.4111	0	0.693022	0	1.49924	0.866866	0	0	10.6803	42.3203	56.6783	0	0	0	1.2848	1.48513	1.25992	1.44842	1.10075	33.3798	1.28535	4.74587	2.94063	5.15406	0	19.473	1.82623	0	53.5406	12.2385	5.19174	13.7862	1.95966	10.4286	31.7665	34.0714	4.333	21.4241	0	0	14.3285	0	0	5.15231	0	12.5437	25.5784	0.464855
RBM15	7.93077	9.57953	0	9.70231	15.5105	16.4917	5.2012	3.69038	24.4713	7.68233	7.87354	6.48066	0	9.86382	0	7.01173	9.57018	5.57965	6.51787	6.54337	4.15948	22.9805	10.6782	6.62572	12.0261	7.01646	0	5.47868	7.1288	5.01943	9.87883	7.21365	8.5468	3.2661	9.27902	8.02391	6.77324	6.56939	7.71675	0	0	14.3285	0	10.6043	14.2446	6.49101	12.2301	2.84204	6.27554
SLC16A4	3.25737	4.5032	118.994	6.2372	3.10209	2.99848	0.866866	59.0461	0	9.74344	3.44468	3.73462	0	2.95915	8.19124	6.15064	10.0232	1.43991	5.06945	9.29526	3.01562	12.9704	4.74587	12.6559	8.5901	8.77058	32.455	2.43497	24.4416	6.35794	6.46654	32.4715	11.6442	2.83062	7.22614	9.32624	8.00473	20.7705	42.5436	0	0	0	0	15.9064	7.88	45.437	18.6588	2.84204	11.1565
LAMTOR5	30.6409	44.2132	59.4969	33.9581	21.7146	41.9788	19.9379	42.4394	0	21.9227	30.51	26.0325	23.6758	17.7549	0	12.9847	16.9385	10.6193	11.5873	19.8136	11.4386	11.3734	22.5429	25.1628	8.5901	21.9264	19.473	7.30491	9.1656	8.70035	14.4861	14.822	13.0302	10.2338	10.5929	18.142	17.1041	12.8313	33.9131	0	55.8025	0	0	21.2085	29.3985	25.964	80.7501	34.1045	23.94
KCNA2	0.123834	0.90064	0	0.693022	0	0	0.866866	22.1423	0	0	0.984193	0.219683	0	0	0	0.779081	0.0516067	0	0	0	0	0.1558	0	0.186116	0	1.75412	0	0.608743	0	0.669257	7.3552	15.9135	24.0864	1.0887	36.0486	16.7157	2.66824	6.82099	1.42151	0	0	0	0	5.30213	0	12.982	0.470389	2.84204	0.697282
KCNA3	0.0323045	5.8951	0	0	15.5105	2.99848	0.866866	0	0	0	1.96839	0	0	1.97276	0	0.205021	0.0172022	0.179989	0	0	0	0	0	0	3.43604	1.75412	0	0	0	0	3.84369	5.78381	8.78829	0.435481	7.63671	6.81221	0.889415	5.39529	1.42151	0	0	0	0	0	0.606154	0	0.156796	0	0
CD53	0.457648	0.573135	0	10.3953	152.003	2.99848	185.509	0	0	0.936869	0	0.219683	0	188.399	8.19124	0.464715	0.355513	147.591	0	0.061153	0.103987	4.63506	80.6797	1.26559	152.904	6.1394	0	107.139	0	1.00389	0.284717	0.269857	0.262494	263.901	0.492691	2.52834	0.478916	0.363413	0.609217	0	0	200.599	0	185.575	0.606154	0	1.25437	0	0.464855
LRIF1	16.0123	11.3808	39.6646	12.4744	6.20418	17.9909	12.1361	1.84519	0	7.30758	6.39725	8.89718	15.7838	20.714	40.9562	5.07086	6.79489	9.35941	0	8.31681	4.05549	9.62067	17.797	15.0754	10.3081	7.01646	6.49101	7.30491	10.184	8.03109	8.91683	10.7339	11.6862	5.44351	10.4286	12.408	17.1041	9.84011	9.5444	0	0	42.9855	0	10.6043	4.54615	0	11.2893	5.68408	5.1134
DRAM2	30.3286	21.1241	0	21.4837	18.6126	29.9848	97.089	33.2135	24.4713	22.4849	23.6206	27.7899	3.94596	28.6051	8.19124	11.5359	13.8019	57.5964	10.1389	13.0256	16.4299	15.2684	27.2887	21.7011	54.9766	25.4347	12.982	96.7901	23.4232	39.4862	22.6911	31.3035	25.1364	62.2737	26.2769	37.2	29.077	24.7121	26.6025	0	44.642	28.657	0	164.366	13.0323	19.473	18.1884	8.52612	20.9185
CEPT1	45.8132	32.7505	39.6646	63.065	58.9398	50.9742	137.832	23.9875	48.9425	33.5399	33.4626	45.0351	11.8379	35.5098	49.1475	26.2974	29.3528	91.9742	37.6588	32.2888	31.716	60.4116	41.5263	55.2763	92.7731	43.8529	51.928	251.411	45.828	72.949	46.6894	63.1829	62.8725	70.5478	51.8968	78.9367	88.3257	54.0927	27.9224	40.8203	22.321	28.657	117.362	106.043	32.4292	6.49101	23.0491	28.4204	35.7938
DENND2D	10.1813	1.47377	19.8323	2.07907	71.3481	10.4947	16.4705	3.69038	0	3.5601	0.984193	2.52636	0	84.8289	0	0.0956766	0.825708	5.93963	0	18.8963	0.831895	1.0127	2.37293	9.64079	42.9505	19.2953	0	21.9147	1.0184	4.35017	0.086278	0.104721	0.188996	16.766	0	0.405489	0.342083	0.0559097	0	0	0	85.971	0	10.6043	0	0	0.156796	0	0.232427
CHI3L2	0.129218	0	0	0	0	0	1.73373	0	0	0.374748	0	0	0	27.6187	0	0.109345	0.0458726	0.719955	0	0	0.415948	0.0779001	1.18647	0.297785	1.71802	0	0	3.04371	0	0	0	0	0	0	0	0	0	0	0	0	0	0	0	10.6043	0.303077	0	0.156796	2.84204	0
PIFO	0.156139	0.163753	0	0	0	0	0.866866	0	0	0.187374	1.96839	0.219683	0	0	0	0.0546723	0.84291	0.359977	1.44842	3.24111	0	0.0779001	0	0.260562	0	0	6.49101	0	0	0	2.72639	0.193331	0.199495	0.653221	0.0821152	0.52475	0.342083	0.195684	0.304608	0	0	0	0	0	0.303077	0	1.41117	0	0.232427
OVGP1	3.54273	1.31002	0	0.693022	3.10209	0	0	0	0	1.87374	0.492097	2.41652	0	0	0	1.05244	2.04133	0.539966	0	2.14036	4.15948	1.0906	10.6782	15.522	1.71802	1.75412	6.49101	1.21749	5.092	4.35017	0.923175	2.04206	5.38637	0.21774	1.47807	13.2046	18.6777	2.32025	5.78756	0	11.1605	0	0	10.6043	0.606154	0	0.627185	0	1.85942
WDR77	19.2697	14.9834	0	7.62324	12.4084	16.4917	15.6036	7.38077	0	9.93081	7.87354	11.2039	0	12.823	0	4.92051	7.28228	6.65958	4.34525	11.5579	5.71928	7.98477	3.5594	8.56132	6.87208	8.77058	0	14.0011	5.092	3.68092	6.35006	6.6256	8.77779	7.40317	7.39037	12.6417	11.6308	6.26189	14.4181	0	33.4815	14.3285	0	10.6043	13.0323	12.982	24.7738	14.2102	6.74039
ATP5F1	52.9902	59.1966	0	33.265	52.7356	46.4765	48.5445	53.5106	0	40.4727	46.2571	42.9481	3.94596	38.4689	73.7212	18.1649	20.0005	22.6786	26.0715	24.0943	18.4057	26.1745	11.8647	37.372	15.4622	19.2953	19.473	20.6973	16.2944	13.7198	31.1421	32.395	33.7147	24.1692	30.3005	50.2377	57.4699	34.8877	48.7374	0	44.642	57.314	0	47.7192	46.0677	64.9101	73.6942	31.2624	25.567
C1orf162	0.893759	1.06439	0	2.07907	0	1.49924	67.6155	0	24.4713	2.81061	2.95258	2.74604	0	4.93191	0	0.984102	0.791303	61.7361	0	0.550377	2.59967	1.2464	9.49173	2.45673	1.71802	0.877058	6.49101	60.8743	5.092	1.00389	1.29417	2.23539	2.59344	4.13707	1.39596	5.12824	7.0469	2.15252	1.42151	0	0	42.9855	0	21.2085	1.81846	6.49101	1.56796	2.84204	0.929709
ADORA3	0.656859	0.655011	0	1.38604	0	1.49924	97.9559	5.53558	0	0.562121	0.492097	3.62478	0	0	16.3825	0.888426	0.980528	7.9195	0	0.917295	3.01562	0.779001	1.18647	1.19114	0	0.877058	0	32.2634	3.0552	2.67703	0.401193	0.426939	0.692984	79.9107	0.328461	0.577225	0.547332	0.754781	0.710753	0	0	0	0	5.30213	0.909231	0	0.470389	0	0.232427
RAP1A	117.26	56.5766	79.3292	169.097	189.228	118.44	266.128	112.557	48.9425	158.893	61.5121	175.527	153.892	181.494	114.677	98.9023	51.2856	188.628	120.218	70.8152	167.835	308.446	156.614	119.077	225.061	168.395	77.8921	327.504	262.747	167.984	84.3238	92.3275	93.7208	481.424	102.151	149.783	167.347	100.582	105.191	122.461	156.247	315.227	0	249.2	55.7662	233.676	61.3073	125.05	100.176
FAM212B	6.9024	11.5446	0	9.00928	0	16.4917	14.7367	20.2971	0	8.43182	7.38145	9.44639	0	2.95915	32.765	3.8134	4.82236	13.3192	21.7262	3.36342	10.2947	8.49112	7.1188	5.9557	3.43604	14.0329	0	7.30491	7.1288	5.35406	82.8571	47.3257	12.2532	13.2822	80.9656	9.11634	10.9466	21.1339	18.2765	40.8203	44.642	28.657	117.362	5.30213	83.9523	38.946	160.716	28.4204	6.74039
DDX20	9.02374	8.43326	0	12.4744	6.20418	17.9909	11.2693	7.38077	0	8.43182	6.39725	7.24955	7.89192	7.89106	8.19124	5.89095	7.87863	7.01956	9.4147	6.1153	5.61529	9.93227	14.2376	6.51405	10.3081	6.1394	12.982	9.73988	0	5.35406	10.6726	11.5314	10.1533	7.18543	11.3319	17.4503	13.8886	9.89602	9.03672	0	22.321	0	0	5.30213	10.0015	12.982	12.2301	2.84204	5.81068
KCND3	4.20497	1.31002	0	0.693022	0	8.99545	0.866866	3.69038	0	6.37071	16.2392	0.219683	0	3.94553	16.3825	5.24855	20.2184	3.59977	8.69049	1.10075	0.623922	1.7138	0	18.0532	3.43604	7.01646	6.49101	13.3923	10.184	1.00389	184.122	567.76	176.301	10.0161	525.784	77.3529	122.808	310.103	14.7227	0	0	14.3285	0	0	36.0662	12.982	28.6937	2.84204	4.88097
CTTNBP2NL	28.1696	56.5766	79.3292	4.85115	0	19.4901	65.8818	38.749	48.9425	39.9106	27.5574	103.691	3.94596	0.986382	114.677	60.7273	73.0579	55.0765	55.764	56.8112	128.528	3.62236	14.2376	22.4828	6.87208	24.5576	71.4011	66.9617	62.1224	248.964	65.2823	110.287	107.444	57.7012	82.1973	145.675	193.961	116.628	95.9517	0	55.8025	14.3285	0	58.3234	33.0354	90.8741	20.3835	28.4204	40.6748
WNT2B	6.80549	10.7258	0	1.38604	0	5.99697	17.3373	9.22596	24.4713	50.9657	6.39725	18.2337	0	0.986382	0	7.61312	5.39004	8.63946	202.054	5.62608	12.5824	1.0127	3.5594	6.06737	1.71802	5.26235	318.059	21.9147	12.2208	57.2215	17.4282	20.7347	20.8105	9.79831	28.6582	31.0414	40.2973	24.153	10.0521	0	0	0	0	10.6043	8.48616	6.49101	5.64467	5.68408	81.582
ST7L	62.8969	55.594	79.3292	32.572	27.9188	62.9682	47.6776	31.3683	122.356	74.9495	71.354	54.4815	39.4596	19.7276	57.3387	60.4676	59.1126	35.0978	58.6608	51.552	56.2569	77.0043	84.2391	72.5106	41.2325	99.9846	103.856	62.0918	97.7664	94.6999	102.434	93.1008	110.814	63.3624	104.697	135.896	135.396	93.3413	41.0206	81.6407	44.642	28.657	0	68.9277	63.3431	25.964	42.6486	65.3669	72.7497
CAPZA1	91.5242	81.9582	198.323	93.5579	127.186	200.898	168.172	81.1884	122.356	95.5606	66.433	95.3426	86.8111	221.936	139.251	73.6026	58.6138	189.348	104.286	67.3906	72.0629	120.122	111.528	73.7018	116.825	164.887	32.455	210.016	91.656	102.396	63.492	58.9699	51.3858	141.313	58.2197	77.1001	82.1683	53.7292	105.191	40.8203	89.284	114.628	117.362	116.647	79.4062	71.4011	76.5166	90.9452	75.074
MOV10	42.1736	16.3753	0	11.0883	34.123	29.9848	25.1391	25.8327	0	41.0349	38.8756	36.6871	0	21.7004	8.19124	25.491	19.8915	21.5986	38.383	18.8351	26.5167	25.3954	27.2887	56.1697	22.3343	21.9264	38.946	23.1322	34.6256	47.8519	23.6963	5.07493	5.26038	11.3225	16.0125	8.04299	6.02066	2.87935	34.2177	40.8203	22.321	14.3285	0	31.8128	28.4892	25.964	32.6136	25.5784	30.9128
RHOC	51.6388	40.2832	0	11.0883	40.3272	49.475	34.6746	186.364	24.4713	70.4526	18.6997	146.749	0	35.5098	16.3825	29.1404	12.4774	18.5388	94.8712	15.4717	109.186	2.99916	3.5594	45.8961	8.5901	28.9429	45.437	6.08743	37.6808	25.7664	19.3176	2.28775	2.46744	7.18543	19.1328	2.75732	10.1256	2.0407	171.799	40.8203	156.247	42.9855	352.086	21.2085	36.9754	149.293	96.2729	93.7873	69.2633
PPM1J	0.247668	0.655011	0	0	0	2.99848	1.73373	0	0	0.187374	0.984193	0.109842	0	0	0	0.150349	0.30964	1.6199	0	0.183459	0	0.0389501	0	0.372231	0	0	0	0	1.0184	0.669257	0.215695	0.374578	1.20747	0	0.410576	1.82231	4.31024	0.335458	0.406145	0	0	0	0	0	0	0	3.91991	2.84204	0
FAM19A3	0.0646091	0.736887	0	0	0	0	0	0	0	0.374748	11.3182	0	0	0	0	0.177685	0.177757	0.179989	0.724208	0.061153	0	0	0	0	0	0	0	0	0	0	0	0	0	0	0	0	0	0	0	0	0	0	0	0	0.303077	0	0.940778	0	0
SLC16A1	62.5954	31.6862	0	144.842	34.123	49.475	44.2102	110.712	122.356	41.9717	32.9705	26.6915	90.7571	53.2646	8.19124	56.9139	70.5464	28.9782	61.5576	7.76643	38.7871	55.8155	27.2887	54.9413	42.9505	17.5412	292.095	19.4798	34.6256	30.1166	48.5659	24.0093	23.0785	26.5643	56.4953	25.8034	23.33	13.5302	477.525	40.8203	122.766	0	0	10.6043	50.6139	25.964	79.0253	14.2102	32.5398
LRIG2	46.1847	44.5407	39.6646	22.8697	37.2251	34.4826	32.9409	38.749	171.299	49.2793	51.6701	32.7328	27.6217	17.7549	24.5737	39.4871	36.6981	17.2789	40.5556	27.9469	36.7074	32.6012	39.1534	35.0642	42.9505	35.9594	51.928	35.9158	49.9016	46.848	54.1653	39.7657	64.332	41.8061	83.7575	78.6648	98.8619	39.9755	34.5223	81.6407	33.4815	42.9855	0	5.30213	42.1277	45.437	41.551	22.7363	53.9231
MAGI3	127.382	178.49	138.826	36.7302	62.0418	35.9818	58.9469	107.021	244.713	125.915	103.34	108.194	15.7838	40.4417	81.9124	209.614	101.533	36.5377	126.736	159.671	99.0995	90.0136	64.0692	387.53	54.9766	100.862	142.802	107.747	170.073	148.91	276.448	159.482	149.107	161.999	209.065	17.5028	155.853	97.7582	124.483	0	44.642	57.314	0	68.9277	139.415	103.856	106.465	252.941	171.764
PHTF1	45.7971	34.7975	39.6646	25.6418	34.123	62.9682	17.3373	11.0712	0	19.1121	55.1148	22.0782	0	31.5642	131.06	17.4815	26.8126	21.9586	32.5893	23.177	30.0522	24.967	65.2557	46.715	46.3865	116.649	45.437	22.5235	11.2024	32.1244	64.4324	70.5577	61.77	23.0805	35.8022	101.668	105.84	99.4914	28.024	0	33.4815	0	0	26.5106	20.0031	32.455	23.2058	11.3682	15.5726
RSBN1	28.5141	76.8	59.4969	41.5813	77.5523	35.9818	26.8728	29.5231	48.9425	29.6051	48.7176	32.8427	39.4596	42.4144	40.9562	30.1245	44.7717	16.9189	36.9346	32.9615	25.4768	53.5174	54.5775	29.1457	29.2063	18.4182	32.455	26.7847	43.7912	17.0661	45.434	63.1748	72.9103	27.653	45.3276	77.0858	94.4148	93.2574	51.4788	40.8203	0	28.657	352.086	15.9064	35.7631	51.928	45.7845	56.8408	38.3505
PTPN22	1.74983	1.7194	0	11.7814	167.513	10.4947	26.8728	1.84519	0	0.936869	0.492097	0.65905	0	172.617	65.5299	2.00921	1.74316	38.1576	1.44842	1.77344	0.831895	5.95936	34.4075	1.63782	134.006	23.6806	0	34.0896	1.0184	2.67703	1.12593	1.55067	2.20495	8.27413	1.72442	3.99764	4.78916	2.23639	1.1169	0	0	171.942	0	53.0213	0.909231	0	0.783981	2.84204	0.697282
BCL2L15	0.581482	0.409382	0	1.38604	0	5.99697	0	0	0	0.374748	0.492097	0.329525	0	0	0	0.451047	0.539004	0	0	0.305765	0.727908	1.28535	0	0.632793	0	0.877058	0	0	0	0.334629	0.780816	1.28082	1.49096	0.21774	1.0675	2.66191	3.07874	1.48161	0.203072	0	0	0	0	0	0.303077	0	0.156796	2.84204	0.697282
AP4B1	5.58869	8.43326	0	9.70231	18.6126	8.99545	4.33433	12.9163	0	9.74344	8.85774	7.13971	3.94596	2.95915	0	7.98216	4.593	2.69983	2.17262	4.95339	5.19935	13.7494	17.797	4.9879	12.0261	12.2788	6.49101	10.3486	12.2208	4.6848	7.30775	7.53587	9.75427	4.57255	9.1969	17.5553	19.0882	8.051	6.29524	0	0	14.3285	0	5.30213	5.15231	6.49101	6.11505	17.0522	12.0862
DCLRE1B	3.03124	8.18764	0	9.00928	6.20418	7.49621	5.2012	5.53558	0	5.99596	1.47629	5.49208	3.94596	2.95915	16.3825	10.1281	14.7767	7.19955	13.0357	13.3925	10.0867	88.5335	122.206	137.502	180.392	89.4599	194.73	121.749	113.042	82.3187	8.38191	8.88516	7.48632	4.57255	5.4196	7.11275	7.59424	8.02305	11.372	0	11.1605	14.3285	0	10.6043	10.9108	0	6.89904	11.3682	10.2268
HIPK1	35.1904	37.5812	59.4969	107.418	46.5314	86.956	40.7427	27.6779	0	38.0369	48.2255	26.8014	169.676	83.8425	32.765	41.9337	32.5925	41.2174	50.6945	23.6662	27.2446	89.0788	70.0015	29.0713	41.2325	67.5334	25.964	31.6546	32.5888	25.4318	29.6883	36.757	35.5312	30.7014	27.0159	44.1744	45.9759	38.5218	69.6538	81.6407	22.321	57.314	117.362	58.3234	30.9139	25.964	37.4743	31.2624	19.059
OLFML3	5.64253	4.58508	0	2.07907	0	0	4.33433	40.5942	0	164.139	1.96839	5.82161	3.94596	2.95915	0	124.571	1.60554	3.95975	291.131	2.0792	5.40732	1.9475	1.18647	17.8671	6.87208	2.63117	116.838	1.82623	147.668	3.34629	0.655713	1.46206	0.692984	289.377	0.821152	0.615389	1.02625	1.20206	161.239	81.6407	33.4815	0	0	5.30213	5.15231	25.964	84.9836	76.7351	392.337
SYT6	0.371502	2.37441	0	0.693022	0	0	4.33433	0	0	0.374748	0	0.219683	0	0	0	8.07784	0.68809	1.97988	2.17262	0.183459	0.623922	0.1558	0	1.07947	0	0.877058	0	1.82623	2.0368	0.669257	2.4201	25.3545	91.2428	245.176	32.5176	2.30413	19.8408	117.438	2.74148	0	0	0	0	0	1.21231	0	5.95826	0	2.09185
TRIM33	102.653	139.272	257.82	149	99.267	113.942	101.423	94.1048	73.4138	113.923	121.548	94.4639	280.163	121.325	98.2949	136.995	173.685	82.9748	82.5597	130.867	111.162	319.741	158.987	130.281	225.061	155.239	58.4191	124.792	139.521	120.132	182.073	248.333	286.076	153.942	196.994	241.175	295.833	294.113	121.133	81.6407	55.8025	100.3	0	84.8341	89.1046	97.3651	56.917	144.944	80.8847
BCAS2	21.0626	28.3292	99.1615	16.6325	18.6126	23.9879	31.2072	20.2971	24.4713	21.7354	41.8282	16.5861	35.5136	69.0468	16.3825	37.4232	32.7072	158.03	13.0357	27.1519	22.0452	17.2159	8.30527	20.7705	6.87208	11.4017	19.473	14.0011	7.1288	16.0622	17.8984	20.7549	26.9634	25.6934	17.6548	30.6263	37.7659	25.4389	14.8243	0	0	14.3285	0	5.30213	14.2446	6.49101	18.0316	11.3682	12.0862
DENND2C	3.56427	0.818764	0	0	3.10209	97.4507	0.866866	0	24.4713	23.2344	1.96839	56.3488	0	0.986382	81.9124	20.4338	3.8017	2.15986	16.6568	18.4682	109.81	2.1812	1.18647	21.7011	1.71802	164.887	6.49101	4.2612	4.0736	66.5911	6.53987	1.97761	2.53044	3.91932	0.821152	5.33337	5.47332	8.41441	85.1888	0	11.1605	0	352.086	0	3.03077	0	87.9627	22.7363	17.6645
AMPD1	0.059225	0.0818764	0	0.693022	0	0	0.866866	1.84519	0	0	0	0	0	0.986382	0	0.191353	0.137618	0	0	0.183459	0.311961	0.19475	0	0.0744462	0	0	0	0	0	0	0	0	0	0	0	0	0	0	0	0	0	14.3285	0	0	0.909231	0	107.092	0	0.929709
NRAS	20.0773	23.826	39.6646	19.4046	18.6126	23.9879	21.6716	22.1423	0	13.8657	15.255	31.6344	3.94596	13.8094	40.9562	12.438	13.2113	8.09949	16.6568	12.0471	23.501	11.8408	11.8647	26.689	8.5901	7.01646	0	7.91366	5.092	14.389	14.732	11.8496	10.3528	9.79831	10.675	16.9781	18.5409	10.2594	27.8209	0	22.321	28.657	0	10.6043	13.3354	12.982	48.1365	22.7363	15.3402
CSDE1	188.152	282.801	297.485	151.079	179.921	181.408	172.506	199.281	97.885	157.769	196.347	158.831	157.838	157.821	188.399	177.07	205.71	164.87	241.885	206.391	182.393	105.438	118.647	168.36	118.543	91.214	175.257	97.3988	87.5824	83.9918	117.804	169.346	159.659	101.902	122.598	171.655	155.716	159.315	225.918	81.6407	256.692	57.314	0	116.647	273.982	240.167	520.407	159.154	127.835
SIKE1	34.5874	34.7975	0	20.7907	18.6126	13.4932	15.6036	25.8327	24.4713	34.2894	33.9547	31.195	15.7838	19.7276	8.19124	30.2475	30.0409	10.7993	52.8672	23.7274	17.9897	15.5021	11.8647	23.0039	5.15406	8.77058	6.49101	14.6098	11.2024	15.0583	20.8016	17.9516	23.0995	7.62091	15.4377	27.0723	33.3189	17.4438	36.553	0	11.1605	14.3285	0	21.2085	21.8215	19.473	30.8889	22.7363	27.8913
SYCP1	0.613786	0.409382	0	1.38604	0	0	1.73373	0	0	0.374748	0.492097	5.49208	0	0	0	0.505719	0.825708	0.899943	0	0.428071	1.76778	4.51821	0	0.893355	0	0	0	0.608743	0	27.1049	0.690224	0.596103	0.83998	0.21774	1.0675	1.45976	1.09466	0.754781	0.710753	0	0	0	0	0	0.303077	0	0.470389	0	0
TSPAN2	0.673011	43.067	0	2.07907	9.30628	56.9712	1.73373	0	0	4.12222	5.41306	1.09842	0	9.86382	16.3825	4.36012	16.8467	0.899943	6.51787	6.60453	6.3432	1.20745	9.49173	0.707239	8.5901	48.2382	6.49101	1.82623	0	3.34629	3.33465	12.1355	34.7542	4.13707	1.88865	68.5181	120.003	24.9916	3.45223	0	0	28.657	0	0	1.81846	0	29.7913	14.2102	1.16214
NGF	0.134602	0.0818764	0	0	0	0	0	5.53558	0	30.5419	0.492097	0.109842	0	0	16.3825	5.22121	0.991996	0.719955	42.7282	1.65113	0	0.311601	0	0.521124	0	0	25.964	0.608743	14.2576	0	1.41065	0.209442	10.8147	0	0.0821152	0.901616	5.13124	0.894556	0	0	0	0	0	0	0	51.928	0.627185	93.7873	7.43767
VANGL1	3.50504	6.05885	0	30.493	12.4084	94.4522	5.2012	7.38077	0	15.7394	1.47629	34.4903	15.7838	2.95915	16.3825	8.66557	8.25134	1.43991	23.1746	14.2487	18.9256	41.0923	14.2376	11.6508	15.4622	41.2217	19.473	6.08743	13.2392	42.4978	7.36383	4.50702	7.23433	0	7.5546	10.4568	9.71515	5.73075	32.4916	40.8203	55.8025	28.657	0	10.6043	13.3354	6.49101	2.97913	28.4204	24.8697
CASQ2	1.28141	0.982516	0	2.07907	0	0	0	1.84519	0	5.99596	0.492097	1.09842	0	0	0	0.423711	0.338311	0.179989	0	0.733836	0.207974	0.779001	0	3.01507	0	0	0	2.43497	4.0736	1.00389	0.444332	0.966654	1.59596	0.21774	0.16423	4.86109	1.02625	1.76116	0.304608	0	22.321	14.3285	0	0	13.9415	25.964	1337.63	230.205	9.76195
SLC22A15	34.9858	4.17569	19.8323	3.46511	18.6126	19.4901	8.66866	3.69038	24.4713	18.3626	6.39725	3.84446	3.94596	1.97276	0	11.2215	7.10453	7.55952	10.8631	7.39951	1.76778	3.34971	36.7805	61.1204	12.0261	19.2953	6.49101	6.08743	29.5336	14.0544	22.7343	90.7768	105.344	1.52418	52.1432	142.866	149.08	51.2972	3.6553	0	0	0	0	10.6043	1.81846	6.49101	1.09757	2.84204	6.97282
MAB21L3	0.242284	0	0	0	0	0	0.866866	0	0	0	0	0	0	0	0	0.164017	0.246565	0.179989	0	1.28421	0	0.0779001	0	0.148892	0	0	0	0	0	0	0.0690224	0.217497	0.451489	0	0.0821152	1.517	3.35241	0.139774	0	0	0	0	0	0	0	0	0	0	0
ATP1A1	164.931	117.574	79.3292	80.3905	74.4502	134.932	64.1481	101.486	48.9425	75.5116	127.453	93.695	35.5136	53.2646	90.1037	36.8492	80.518	70.3756	47.7977	81.8839	54.1772	50.0508	54.5775	79.0247	32.6424	39.4676	84.3831	54.1781	28.5152	35.4706	20.6852	54.5918	64.332	42.8948	39.0047	89.7991	80.0473	32.176	48.0266	81.6407	11.1605	57.314	117.362	53.0213	42.1277	32.455	90.6282	36.9465	34.6317
AL136376.1	1.97596	0.736887	0	0	0	2.99848	3.46746	1.84519	0	0.749495	2.46048	1.20826	0	0	0	0.751745	1.57687	1.97988	1.44842	1.71228	0.623922	0.428451	2.37293	0.558347	0	3.50823	0	2.43497	0	0.334629	0.638457	0.878044	0.881979	0.435481	0.492691	1.57902	1.43675	0.866601	0.406145	0	0	0	0	0	0.303077	0	0.627185	0	0.232427
CD58	36.3588	12.9365	0	151.079	43.4293	61.4689	47.6776	44.2846	24.4713	16.3015	11.3182	39.8725	110.487	23.6732	90.1037	4.22344	10.7915	37.9776	27.5199	14.9213	22.0452	256.759	59.3233	17.9043	63.5667	80.6893	6.49101	86.4415	13.2392	38.1477	18.1054	3.86259	5.32337	24.1692	3.36672	12.0359	30.1033	1.92889	24.5717	122.461	22.321	57.314	117.362	15.9064	22.7308	19.473	18.8156	25.5784	28.3561
IGSF3	11.7804	126.581	19.8323	6.93022	12.4084	2.99848	6.06806	108.866	0	19.4869	24.1127	3.40509	0	0	0	6.35566	11.1815	0.899943	47.7977	20.0582	4.57542	7.08891	2.37293	10.0875	5.15406	4.38529	0	1.21749	5.092	1.00389	39.4161	46.9512	168.343	6.31447	9.68959	139.965	227.964	78.1898	14.6212	40.8203	11.1605	14.3285	0	5.30213	95.1662	12.982	16.3068	28.4204	131.786
CD2	0.0753773	0.0818764	0	0.693022	55.8377	1.49924	2.6006	0	0	0	0	0	0	75.9514	8.19124	0.0410043	0.0802771	2.87982	0	0.183459	0	0.19475	0	1.00502	15.4622	0.877058	0	3.04371	0	0	0.043139	0.0563881	0.0944978	0	0	0.0858682	0	0.0279549	0.101536	0	0	128.957	0	0	0	0	0.313593	0	1.39456
PTGFRN	72.0122	24.481	0	8.31626	15.5105	10.4947	18.2042	84.8788	73.4138	54.3384	12.3024	11.6432	11.8379	3.94553	40.9562	24.3839	25.1439	4.6797	59.385	18.2848	13.2063	1.8696	2.37293	17.9043	5.15406	0	64.9101	11.5661	10.184	3.68092	23.8386	18.741	22.522	4.79029	87.8633	98.3143	150.79	8.77783	22.1349	0	33.4815	0	0	0	211.548	32.455	71.6559	42.6306	179.201
CD101	6.09479	2.29254	0	0	3.10209	1.49924	3.46746	0	0	3.18535	0	0	0	0	0	1.51716	2.02986	7.37953	0	1.28421	0.519935	0.311601	1.18647	1.67504	0	2.63117	0	7.30491	2.0368	0.334629	1.96283	1.57081	1.70096	0.21774	7.30825	14.4783	20.6618	0.419323	0.812289	0	0	0	0	5.30213	8.18308	6.49101	3.29272	0	3.71884
TTF2	24.9714	17.1122	39.6646	37.4232	34.123	53.9727	30.3403	25.8327	24.4713	10.3056	7.87354	12.4121	39.4596	51.2919	0	12.561	22.0762	34.1978	8.69049	17.2452	15.2861	74.122	60.5098	12.507	70.4388	42.9758	25.964	34.6983	18.3312	9.03497	21.9362	11.0762	6.29985	24.1692	16.9978	14.3543	14.5043	4.05346	7.71675	40.8203	11.1605	71.6425	0	26.5106	32.1262	19.473	13.3277	14.2102	10.6917
TRIM45	8.73838	3.35693	39.6646	4.15813	0	2.99848	1.73373	5.53558	48.9425	7.12021	2.95258	2.6362	0	3.94553	0	5.4809	6.38777	0.899943	4.34525	4.64763	2.59967	4.75191	0	4.09454	1.71802	2.63117	6.49101	1.21749	2.0368	7.0272	5.19825	2.39247	3.75891	0.870961	3.61307	4.78	10.3309	4.0255	2.74148	0	0	0	0	5.30213	11.2138	12.982	16.7772	2.84204	4.18369
VTCN1	0.183059	1.22815	0	0	0	1.49924	0	0	0	0	0	0.109842	0	2.95915	0	0.314366	1.33604	0	0	50.2066	1.5598	0.311601	0	1.19114	1.71802	0	0	0	0	0	0.513354	2.11053	5.78536	0	0.246346	3.72096	11.1519	6.15007	1.52304	0	0	0	0	0	0	0	0.783981	0	0.464855
MAN1A2	99.5411	99.3979	594.969	65.144	120.982	106.446	96.2221	129.163	48.9425	110.363	133.358	102.702	19.7298	101.597	49.1475	84.9882	104.045	63.356	82.5597	109.586	89.9487	101.893	134.071	147.18	158.058	105.247	64.9101	105.312	122.208	120.132	145.331	164.303	244.529	132.386	227.87	277.264	561.016	206.335	145.501	40.8203	122.766	128.957	117.362	90.1362	173.966	149.293	95.1753	79.5771	114.122
FAM46C	1.32449	0.90064	0	250.181	15.5105	23.9879	1.73373	0	0	3.37273	0.492097	0.65905	528.759	29.5915	24.5737	0.382706	1.29017	2.51984	3.62104	5.0757	0.311961	62.7096	20.1699	18.1649	20.6162	14.91	6.49101	15.8273	11.2024	5.01943	0.284717	1.24054	0.514488	0.21774	0	0.2099	0.136833	1.03433	12.3874	40.8203	0	0	0	0	0.909231	0	2.82233	0	3.71884
GDAP2	34.5389	27.6742	39.6646	20.7907	15.5105	14.9924	55.4794	23.9875	0	28.8556	24.6048	29.6573	15.7838	17.7549	40.9562	27.3908	23.0797	26.9983	23.1746	18.5905	23.501	27.4209	35.594	34.9897	27.4883	18.4182	25.964	57.2218	19.3496	29.4473	40.2746	54.04	53.3387	50.0803	50.9935	65.4554	71.0848	56.1334	19.4949	0	22.321	28.657	0	58.3234	26.0646	25.964	16.934	28.4204	22.7779
WDR3	26.8505	25.4635	0	16.6325	24.8167	28.4856	18.2042	20.2971	0	21.9227	17.2234	13.0712	19.7298	35.5098	8.19124	16.06	14.662	10.2594	23.1746	13.7594	12.6864	16.8654	24.9158	14.4426	10.3081	12.2788	32.455	9.73988	16.2944	13.7198	22.648	18.8216	28.1813	6.31447	22.1711	40.2102	34.8924	19.82	18.378	0	11.1605	14.3285	0	10.6043	36.9754	32.455	21.0107	17.0522	16.2699
SPAG17	7.86077	2.70192	39.6646	17.3255	3.10209	4.49773	0	1.84519	24.4713	3.37273	5.41306	1.3181	0	0	0	7.35343	20.0349	2.69983	0	21.7093	1.97575	40.1186	20.1699	2.75451	3.43604	4.38529	6.49101	1.82623	3.0552	1.33851	11.2075	4.24522	9.99576	0.870961	3.94153	96.201	77.037	7.15644	1.92919	40.8203	0	0	0	15.9064	2.12154	0	3.29272	31.2624	26.9616
TBX15	0.635323	0.736887	0	0	0	0	1.73373	0	0	0.749495	0.984193	0.65905	0	0.986382	0	0.478383	0.888783	0	7.24208	0.856142	0.415948	0.467401	0	0.856132	0	0	6.49101	0	0	1.67314	1.8938	0.684713	3.49642	0.870961	1.80653	1.39774	0.547332	0.587052	8.83365	0	0	14.3285	0	0	47.8862	0	116.656	90.9452	139.224
WARS2	32.2669	17.2759	59.4969	18.0186	6.20418	10.4947	12.1361	23.9875	24.4713	30.5419	22.1443	20.101	7.89192	17.7549	0	31.9697	34.135	14.5791	17.381	36.2026	25.4768	46.3895	29.6617	30.5602	25.7703	16.6641	38.946	28.0022	26.4784	22.4201	52.4915	24.9155	25.2204	19.1611	62.736	35.5256	31.1295	20.1275	20.9164	0	11.1605	42.9855	0	21.2085	37.8846	25.964	29.3209	11.3682	33.9344
HAO2	0.193827	0	0	0	0	0	0	0	0	0.187374	0	0.109842	0	0	0	0.136681	1.8005	0	0	0.122306	0.103987	0.584251	1.18647	17.346	1.71802	0	0	0.608743	1.0184	0.669257	0	0	0	0	0	0	0	0	0	0	0	0	0	5.30213	0.303077	0	0.156796	0	0
HSD3B2	3.25737	0.245629	0	0	0	1.49924	0.866866	0	48.9425	0.749495	0	0.329525	0	0	0	0.0273362	0.200693	0	0	0.061153	0	0.0389501	0	0.59557	0	0	0	0	0	0	0	0	0	0	0	0	0	0	0	0	0	0	0	0	0.303077	0	0.156796	0	0
ZNF697	3.5535	10.8077	19.8323	0.693022	3.10209	1.49924	2.6006	11.0712	0	11.9919	4.42887	4.83303	0	0	0	8.6929	5.05746	0.719955	8.69049	3.30226	4.36745	0.973752	3.5594	11.6508	1.71802	0.877058	6.49101	0.608743	11.2024	13.0505	3.20091	7.99906	15.4766	2.39514	6.4871	18.2088	30.1033	12.1604	8.22443	0	0	0	0	10.6043	5.75846	6.49101	8.15341	19.8943	8.13496
PHGDH	10.1329	7.04137	0	3.46511	18.6126	5.99697	1.73373	44.2846	0	26.2323	11.8103	6.04129	0	7.89106	0	23.1811	44.1066	6.83957	105.01	52.4081	12.1665	3.70026	32.0346	92.5739	25.7703	4.38529	142.802	4.2612	16.2944	13.7198	77.4345	14.4716	9.94327	2.61288	33.503	14.4211	7.52582	11.126	11.4736	0	0	14.3285	0	10.6043	53.3416	64.9101	16.3068	42.6306	58.5717
HMGCS2	1.83597	0.90064	0	0.693022	0	0	0	0	0	0.749495	0	0.439367	0	0	0	0.396375	1.40485	0.359977	0	147.073	0.727908	13.7494	15.4241	502.401	13.7442	11.4017	12.982	17.0448	29.5336	9.70423	0	0	0	0	0	0	0	0	0	0	0	0	0	0	0.909231	0	1.41117	0	0.232427
NOTCH2	63.4246	8.43326	0	32.572	55.8377	91.4538	134.364	197.436	73.4138	235.342	6.88935	9.2267	7.89192	36.4961	122.869	269.863	159.574	98.4538	212.193	51.7355	1.66379	38.21	55.7639	75.3768	70.4388	95.5993	90.8741	153.403	169.054	3.68092	223.4	13.2754	11.7177	72.7253	42.6999	22.5356	14.2991	7.26826	64.8816	81.6407	33.4815	28.657	0	190.877	176.997	175.257	38.7287	198.943	270.778
FAM72B	0.662243	0.409382	0	4.15813	0	0	0	1.84519	0	0	0.492097	0.549208	0	0	0	0.35537	0.923187	1.97988	1.44842	0.672683	0.415948	3.15496	1.18647	0.446677	1.71802	2.63117	0	1.82623	1.0184	1.00389	0.409821	0.358467	0.335992	0.870961	0.903267	0.400718	0.273666	0.195684	2.5384	0	0	0	0	5.30213	2.42462	6.49101	5.48787	5.68408	3.71884
FCGR1B	0.0484568	0.0818764	0	0	0	0	9.53553	0	0	0	0	0.109842	0	0	0	0.0136681	0.0344045	10.4393	1.44842	0.366918	0	0	0	0.0372231	0	0	0	0.608743	0	0	0.0345112	0.0563881	0.125997	41.5884	0	0.0620159	0.0684165	0.0838646	0.101536	0	0	0	0	5.30213	0	0	0	0	0.232427
FAM72D	0.597634	0.90064	0	4.15813	0	2.99848	0.866866	0	0	0.187374	0	0.768892	0	0	16.3825	0.136681	0.458726	1.25992	3.62104	0.183459	1.03987	5.53091	1.18647	0.818909	5.15406	0.877058	6.49101	1.21749	0	2.67703	0.409821	0.277913	0.377991	0.653221	0.246346	0.434111	0.273666	0.111819	1.62458	0	0	0	0	0	0.909231	0	0.313593	0	0.232427
AL592284.1	0.166907	0.245629	0	0.693022	0	0	0	0	0	0	0.492097	0	0	1.97276	0	0.382706	0.510333	0	0.724208	0.305765	0.207974	0.0779001	0	0.372231	0	0	0	0.608743	0	0	0.245892	0.31819	0.902979	5.00803	0.903267	1.64581	1.98408	0.531142	0.304608	0	0	0	0	5.30213	0.303077	0	3.44952	0	0
NBPF9	1.44294	1.14627	0	0.693022	3.10209	4.49773	1.73373	5.53558	0	4.49697	0.984193	1.09842	0	0	0	7.55845	6.53685	2.69983	5.79366	2.44612	1.76778	0.467401	1.18647	3.42453	3.43604	6.1394	0	4.2612	7.1288	1.00389	3.88682	1.89706	1.62746	1.52418	2.62769	2.66191	3.07874	2.51594	1.62458	0	0	0	0	0	6.97077	0	3.13593	0	3.02156
PDE4DIP	10.1975	142.383	237.988	3.46511	31.0209	16.4917	56.3463	42.4394	0	72.701	197.331	9.55623	0	26.6323	16.3825	32.6531	36.5376	35.0978	60.8334	32.3499	5.71928	3.46656	40.3399	28.5501	39.5145	23.6806	142.802	85.8327	60.0856	5.35406	85.4023	230.225	528.159	72.7253	136.229	536.256	865.059	151.152	28.8363	122.461	0	71.6425	0	63.6256	22.4277	38.946	717.813	34.1045	185.245
AL590452.1	0.20998	0	0	0	3.10209	1.49924	0	0	0	0.562121	0	0.109842	0	0	0	0.246026	0.229363	0	0	0	0	0.0779001	0	0.111669	0	2.63117	0	0	0	0	0.815327	0.571937	1.08147	0.435481	1.23173	1.66966	1.16308	0.950465	0.101536	0	0	0	0	0	0.909231	0	0.313593	0	0
NOTCH2NL	27.5827	2.37441	79.3292	14.5535	49.6335	113.942	100.556	62.7365	24.4713	126.665	1.96839	4.50351	0	38.4689	147.442	172.806	123.243	65.6959	126.012	46.6598	2.07974	20.1761	66.4421	71.3567	80.7469	195.584	129.82	157.056	126.282	3.01166	165.291	9.5457	9.04029	62.2737	29.4794	29.3574	18.062	5.78666	30.1562	0	22.321	42.9855	117.362	137.855	98.1969	58.4191	61.1505	119.366	109.706
RP11-458D21.5	8.33457	0.818764	0	6.2372	15.5105	49.475	37.2752	20.2971	0	48.1551	0.984193	1.86731	0	10.8502	24.5737	56.2715	48.7741	29.5181	39.1072	15.7775	0.519935	7.01101	23.7293	28.9224	41.2325	92.9681	64.9101	66.353	53.9752	1.67314	50.2828	3.71759	3.35992	23.0805	10.0181	11.3394	8.48365	1.81707	13.1997	0	0	0	0	42.417	47.5831	12.982	26.3418	36.9465	44.8585
NBPF10	7.73155	1.63753	0	6.2372	21.7146	79.4598	19.0711	16.6067	24.4713	42.9086	1.96839	1.53778	0	12.823	81.9124	71.2381	62.7136	27.5383	67.3513	19.0797	2.91163	4.59611	13.0511	25.8701	12.0261	52.6235	38.946	37.742	34.6256	1.67314	33.8555	4.72452	3.59092	14.3709	6.56922	9.21175	6.77324	3.88573	22.1349	81.6407	22.321	14.3285	0	53.0213	53.3416	45.437	49.0772	45.4726	54.6204
HFE2	0.441495	0.245629	0	0.693022	0	1.49924	0	0	0	0.187374	0.492097	0	0	0	0	0	0.0573408	0	0	0	0	3.77816	2.37293	97.4874	3.43604	3.50823	6.49101	1.82623	5.092	2.67703	0	0	0	0	0	0	0	0	0	0	0	0	0	0	6.66769	6.49101	237.233	8.52612	3.71884
TXNIP	90.0381	159.577	39.6646	142.069	483.926	161.918	249.657	380.11	146.828	289.493	213.57	360.94	86.8111	265.337	155.634	72.9192	74.7036	169.549	178.879	138.512	95.148	37.3921	32.0346	17.1226	87.619	35.9594	253.149	93.1376	60.0856	32.7936	70.4676	29.0278	42.3665	41.5884	37.8551	24.5535	10.8782	46.6008	193.934	163.281	446.42	343.884	117.362	201.481	204.577	220.694	187.999	142.102	334.23
POLR3GL	17.3691	17.7672	0	16.6325	9.30628	35.9818	15.6036	20.2971	0	14.6152	18.6997	10.2153	23.6758	38.4689	49.1475	13.3537	6.08386	8.27948	14.4842	6.91029	8.83889	17.2159	15.4241	34.5803	10.3081	12.2788	6.49101	10.9574	13.2392	5.35406	15.1547	6.37589	9.70177	10.4515	14.945	9.63155	9.64673	5.81461	16.9565	0	44.642	42.9855	0	15.9064	10.6077	19.473	27.4393	11.3682	11.1565
ANKRD34A	0.495336	1.31002	0	0	0	1.49924	0	0	0	0.187374	0.984193	0.329525	0	0	0	0.492051	0.229363	0.179989	0.724208	0	0	0.11685	0	0.260562	0	0	0	0	1.0184	0	0.70748	1.46609	1.98445	0.21774	2.38134	4.98036	5.19966	1.34183	0.710753	0	0	0	0	0	0	0	1.72476	0	0
LIX1L	30.3232	41.7569	0	13.8604	21.7146	37.481	17.3373	51.6654	48.9425	56.3995	20.6681	42.2891	0	17.7549	24.5737	41.9064	15.8719	16.7389	39.8314	2.0792	35.0436	14.3726	20.1699	29.7041	22.3343	27.1888	32.455	24.9585	53.9752	28.1088	63.9406	36.2374	35.9407	19.8144	32.8461	42.4857	43.1024	44.2246	59.7033	0	55.8025	14.3285	0	21.2085	29.0954	51.928	49.8612	68.2089	37.4208
RBM8A	45.6302	95.7135	39.6646	26.3348	52.7356	49.475	31.2072	59.0461	48.9425	35.9758	51.178	32.9525	7.89192	60.1693	65.5299	33.2681	60.4946	27.3583	30.4167	55.955	34.0037	16.9043	21.3564	32.8308	29.2063	15.787	58.4191	13.3923	16.2944	9.03497	45.3305	46.1497	51.5013	11.758	41.2218	43.5781	36.2608	41.9043	51.9865	0	44.642	42.9855	234.724	26.5106	56.6754	32.455	95.4889	22.7363	25.3346
PEX11B	11.3281	13.5096	0	7.62324	18.6126	20.9894	11.2693	29.5231	24.4713	11.0551	13.7787	8.67749	3.94596	14.7957	32.765	8.73391	8.19974	5.75964	15.9326	10.2737	6.55118	8.72482	9.49173	12.6186	12.0261	6.1394	0	11.5661	5.092	8.36572	11.8158	11.5716	14.3847	8.49187	14.4523	21.2524	20.4565	9.1692	13.7074	0	0	0	0	0	8.78923	25.964	10.9757	8.52612	12.0862
ITGA10	0.554561	3.60256	0	1.38604	6.20418	2.99848	3.46746	0	0	6.18334	0.984193	3.62478	0	0	0	2.33724	1.25576	2.51984	0.724208	1.58998	2.80765	3.03811	4.74587	1.07947	3.43604	8.77058	0	1.82623	2.0368	12.3813	1.61771	5.31257	5.42837	0.653221	4.35211	14.1492	11.5624	3.55027	17.6673	0	0	14.3285	0	0	1.21231	0	2.19515	2.84204	11.3889
ANKRD35	0.2369	2.45629	0	0.693022	0	1.49924	0	5.53558	0	1.49899	2.95258	0.109842	0	0	0	3.5537	3.09067	0	7.96628	1.65113	0.623922	0.19475	0	0.335008	0	0	0	0	0	0.669257	3.12326	1.30095	0.640485	0.870961	1.0675	0.901616	2.25775	1.00638	0.710753	0	0	0	0	0	1.81846	6.49101	1.41117	0	4.18369
PIAS3	6.16478	13.1002	0	5.54417	0	8.99545	6.93493	7.38077	24.4713	27.9187	17.7155	11.5334	0	10.8502	0	25.1219	11.256	6.65958	24.6231	16.2055	10.9186	5.45301	10.6782	4.76456	1.71802	11.4017	32.455	7.91366	12.2208	8.70035	16.5611	10.9997	9.74377	6.74995	7.47248	14.3591	17.0357	9.64443	22.4395	0	44.642	0	0	5.30213	18.4877	6.49101	12.0733	19.8943	44.8585
NUDT17	1.71752	3.02943	0	2.77209	3.10209	5.99697	1.73373	1.84519	0	3.18535	2.46048	1.75747	0	0	0	2.25523	1.5654	1.97988	7.24208	1.9569	2.07974	5.84251	2.37293	2.30783	0	5.26235	0	2.43497	2.0368	2.00777	4.57705	2.15483	2.29945	1.52418	2.87403	4.55101	4.31024	2.57185	2.74148	0	0	0	0	5.30213	3.03077	6.49101	20.0699	5.68408	3.48641
POLR3C	14.7739	16.2934	0	44.3534	9.30628	17.9909	18.2042	16.6067	24.4713	12.1793	18.6997	15.1582	51.2975	19.7276	40.9562	19.9144	19.8112	14.0391	21.002	15.1048	23.2931	81.2888	35.594	22.855	34.3604	18.4182	32.455	34.0896	32.5888	21.0816	20.4134	18.3382	21.3985	27.2175	22.7459	30.9841	39.9553	18.562	12.1843	40.8203	11.1605	14.3285	0	10.6043	15.4569	32.455	13.3277	19.8943	10.9241
RNF115	77.1056	67.6299	138.826	101.874	93.0628	106.446	103.157	49.8202	171.299	101.931	85.1327	81.0632	130.217	76.9378	16.3825	92.9157	93.2534	72.5354	63.7303	77.0528	87.453	216.056	112.714	83.417	170.084	172.78	110.347	107.747	152.76	129.501	133.347	118.069	142.734	120.41	120.463	127.075	162.9	126.971	87.118	0	156.247	57.314	0	111.345	66.6769	71.4011	86.0812	71.051	77.3983
CD160	0.786077	0.655011	0	0	68.246	0	0	0	0	0.374748	0	0.439367	0	49.3191	0	0.478383	0.487397	0.179989	0	0.366918	0.415948	0.19475	0	0.521124	51.5406	0	0	0.608743	0	0	0.612574	0.624297	0.797981	0.21774	1.0675	0.977943	1.71041	0.475233	0.507681	0	0	0	0	0	0.303077	0	0	0	0.697282
PDZK1	1.3191	0.573135	0	0.693022	0	0	0.866866	0	0	0.562121	0.984193	0.329525	3.94596	0	0	0.628732	2.5746	0.359977	0.724208	1.65113	0.935882	1.3243	0	31.0441	1.71802	2.63117	0	0.608743	2.0368	1.67314	1.05259	0.894155	1.14447	0.653221	0.739037	1.25463	1.84725	0.698872	0.406145	0	0	0	0	0	0.909231	0	0.313593	0	2.09185
GPR89A	13.9448	8.92452	0	24.2558	0	19.4901	13.003	1.84519	0	12.9288	11.8103	7.13971	51.2975	12.823	16.3825	12.602	13.5152	8.09949	12.3115	12.2918	8.21497	73.3819	30.8481	15.4476	24.0523	19.2953	19.473	19.4798	13.2392	13.0505	19.9216	15.1644	22.585	10.4515	18.9686	35.2489	36.1923	14.7322	7.20907	40.8203	0	14.3285	117.362	5.30213	10.6077	6.49101	5.33107	11.3682	12.5511
GPR89C	0.452264	0.327505	0	0	0	0	0.866866	0	0	0.187374	0	0.219683	3.94596	0	0	0.519387	0.372715	0	0.724208	0.489224	0.415948	2.37595	0	0.967801	0	5.26235	0	1.21749	0	0.334629	0.634143	0.511521	0.766482	0	0.574806	1.32619	1.77883	0.587052	0	0	0	0	0	0	0	0	0.313593	0	0.232427
NBPF11	0.802229	0.327505	0	1.38604	0	0	0.866866	0	0	0	0.984193	0.219683	0	0	0	0.779081	0.877314	0.179989	0.724208	0.550377	0.519935	0.701101	1.18647	0.893355	1.71802	0	12.982	1.82623	3.0552	1.33851	1.09142	0.805545	0.724483	1.30644	0.821152	1.12106	1.29991	0.615007	0.812289	0	0	0	0	0	0.606154	0	0.940778	0	0.929709
NBPF12	10.1059	11.1352	19.8323	6.2372	0	4.49773	16.4705	3.69038	0	15.7394	11.3182	6.92003	11.8379	5.91829	0	10.7431	12.4888	4.49972	5.06945	10.4572	4.67941	10.127	7.1188	12.172	8.5901	12.2788	19.473	14.6098	12.2208	9.3696	15.0857	12.9411	12.8727	8.49187	14.2059	21.5577	28.1876	13.1667	4.87374	0	0	0	0	5.30213	10.3046	6.49101	9.25098	2.84204	11.6214
PRKAB2	47.3692	19.6503	19.8323	12.4744	12.4084	17.9909	10.4024	12.9163	0	20.7985	20.176	17.4648	0	7.89106	16.3825	10.4698	13.7561	3.41978	7.96628	7.64413	6.44719	12.464	13.0511	63.2049	12.0261	14.91	6.49101	16.4361	10.184	7.69646	21.6515	20.6662	28.4438	10.6693	25.7842	55.0511	58.633	26.1658	15.0274	0	0	14.3285	0	10.6043	16.6692	6.49101	65.6976	25.5784	16.7348
FMO5	8.87298	3.76631	0	4.15813	3.10209	4.49773	6.06806	9.22596	0	4.49697	6.88935	3.18541	0	0	32.765	2.18689	3.5666	1.79989	0	4.34186	1.5598	6.77731	14.2376	262.497	3.43604	11.4017	6.49101	20.0885	8.1472	5.35406	4.6849	2.87982	3.13943	5.87899	4.35211	5.05668	8.55207	3.74595	2.63994	0	0	0	0	21.2085	1.51538	0	3.29272	0	4.64855
CHD1L	20.6964	18.5859	19.8323	49.8976	58.9398	95.9515	43.3433	23.9875	0	23.4217	31.4942	20.8699	27.6217	64.1149	90.1037	33.0904	58.2755	34.9178	21.7262	33.6953	32.2359	127.445	106.782	67.8205	72.1568	165.764	25.964	59.6568	39.7176	26.101	42.3841	20.2997	29.2208	59.8786	56.0847	34.7098	34.8924	13.5302	29.1409	40.8203	55.8025	14.3285	234.724	26.5106	36.0662	32.455	15.8364	34.1045	28.3561
BCL9	39.7992	30.7855	0	5.54417	18.6126	5.99697	5.2012	53.5106	97.885	34.2894	21.6522	25.1537	7.89192	10.8502	8.19124	41.4963	61.0049	6.2996	36.2104	50.8793	20.9014	3.34971	10.6782	17.2343	10.3081	3.50823	0	3.04371	52.9568	25.7664	76.9169	73.4858	95.6422	4.13707	54.4424	80.0912	62.6011	89.7631	22.2364	0	33.4815	0	0	10.6043	34.5508	32.455	31.9864	34.1045	32.7723
ACP6	24.8745	3.35693	59.4969	3.46511	6.20418	20.9894	6.06806	11.0712	48.9425	6.74546	19.6839	6.15113	0	0.986382	0	7.50378	18.2573	6.47959	2.89683	35.1018	6.86314	5.37511	18.9835	27.8057	10.3081	36.8364	12.982	6.69617	2.0368	5.01943	34.934	7.33851	7.54932	10.887	26.5232	16.0621	6.97849	6.17802	3.55377	0	11.1605	14.3285	0	10.6043	9.39539	0	10.9757	5.68408	3.71884
GJA5	0.484568	0.90064	19.8323	0	0	11.9939	0	12.9163	0	6.93283	0	4.72319	0	0.986382	0	2.6106	0.332577	0	0.724208	1.22306	6.13523	0.350551	0	0.818909	1.71802	8.77058	0	0	1.0184	23.424	0.125103	0.100693	0.199495	0	0	4.00718	0.410499	0.111819	11.372	0	0	0	0	0	0.606154	0	5.95826	56.8408	1.39456
GPR89B	2.72435	1.47377	0	8.31626	3.10209	1.49924	3.46746	1.84519	0	2.81061	3.44468	0.878734	3.94596	7.89106	0	3.8544	6.06666	5.03968	3.62104	3.17996	1.66379	21.6562	3.5594	7.03517	8.5901	10.5247	0	3.65246	3.0552	3.01166	4.30959	4.13647	6.96134	3.70158	6.40499	13.3382	14.778	4.80824	2.74148	0	0	0	0	0	4.54615	0	6.11505	0	1.85942
NBPF24	0.909911	0.491258	0	0	0	0	0.866866	0	0	0.562121	0	0.439367	0	0	8.19124	1.59917	1.5138	0.719955	0.724208	1.28421	1.35183	0.856902	1.18647	0.930578	1.71802	0	0	0.608743	2.0368	0.669257	0.845525	0.700824	0.808481	0.870961	0.903267	0.858682	1.43675	0.726826	0.304608	0	0	0	0	0	0.303077	0	0.783981	0	0.697282
NBPF14	1.49678	0.0818764	0	1.38604	6.20418	7.49621	3.46746	3.69038	0	4.87172	0.492097	0.65905	0	1.97276	16.3825	8.21452	3.45192	2.51984	2.89683	3.42457	1.5598	0.895852	2.37293	1.74949	0	7.01646	12.982	4.86994	7.1288	0.334629	6.44065	0.974709	0.923978	2.61288	1.80653	2.49972	1.71041	0.670917	0.710753	0	0	0	0	0	8.78923	0	7.99661	2.84204	9.76195
NBPF20	2.2344	3.93007	0	0	0	2.99848	1.73373	0	24.4713	1.12424	1.96839	1.3181	0	0	0	1.66751	1.27297	0.539966	2.89683	0.550377	0.935882	0.272651	2.37293	3.16397	1.71802	0.877058	0	0.608743	4.0736	1.67314	2.97659	4.27744	5.45987	0.435481	4.35211	12.0788	9.44148	4.75233	2.5384	0	0	0	0	0	12.7292	0	15.0524	0	2.09185
NBPF15	15.3716	8.59702	19.8323	1.38604	9.30628	2.99848	6.93493	5.53558	24.4713	20.7985	16.7313	25.2636	0	0	0	15.855	13.2629	1.25992	21.002	9.1118	27.8685	1.20745	3.5594	21.5522	1.71802	3.50823	19.473	3.04371	19.3496	27.1049	27.2078	19.8325	16.6106	11.1048	27.0159	41.4171	48.1652	17.36	11.372	0	33.4815	0	0	0	17.5785	6.49101	10.8189	14.2102	16.0375
NBPF16	0.188443	0.245629	0	0	0	0	0.866866	0	0	0.374748	0	0.549208	0	0	0	1.33947	1.18695	0.719955	1.44842	0.244612	0.103987	0.0779001	0	0.223339	0	0	0	0	0	0.334629	0.759247	0.475271	0.44099	0.21774	0.492691	0.906387	0.820998	0.531142	0.609217	0	0	0	0	0	0.606154	0	1.88156	0	0.464855
FAM72C	0.317661	0.163753	0	1.38604	0	0	0	0	0	0.187374	0.492097	0.109842	7.89192	0	0	0.0546723	0.15482	0.539966	0.724208	0.061153	0.207974	1.12955	2.37293	0.186116	0	0	6.49101	0.608743	0	0.669257	0.142359	0.124859	0.0629985	0	0.246346	0.10018	0.0684165	0.0279549	0.203072	0	0	0	0	0	0.303077	0	0.470389	0	0
FCGR1A	0.113066	0	0	0.693022	0	0	30.3403	0	0	0.187374	0	0	0	0	0	0.177685	0.0229363	22.6786	0	0.183459	0	0.11685	1.18647	0.0372231	1.71802	0	0	3.65246	0	0	0.107848	0.165137	0.0944978	145.886	0	0.128802	0.0684165	0.0838646	0	0	0	0	0	37.1149	0	0	0.313593	0	0
HIST2H2BF	2.86972	0.327505	0	0.693022	0	0	1.73373	0	0	0	12.3024	0	0	0	0	0.533055	0.814239	1.43991	0	0.856142	0	0.623201	0	1.30281	1.71802	0	0	0.608743	1.0184	1.67314	0.776502	0.986792	0.82948	6.09673	0.328461	0.844371	1.29991	0.642962	0.101536	0	0	0	0	0	0	0	0	0	0
HIST2H2BE	3.6558	5.24009	0	4.85115	12.4084	11.9939	0	5.53558	24.4713	2.24849	50.6859	2.41652	3.94596	13.8094	40.9562	5.38523	6.69167	5.21967	2.17262	8.62258	3.74353	2.37595	9.49173	10.8319	0	12.2788	0	3.04371	1.0184	2.67703	3.08875	10.5647	6.81434	10.887	5.66595	5.38584	5.19966	5.08779	4.06145	0	0	0	0	0	1.81846	19.473	19.2859	2.84204	2.5567
HIST2H2AC	1.93827	7.36887	0	11.7814	6.20418	1.49924	3.46746	7.38077	0	2.62323	3.93677	4.50351	63.1354	25.6459	16.3825	10.2921	12.9246	9.71939	7.24208	6.66568	6.75915	16.8654	7.1188	7.74241	5.15406	2.63117	12.982	9.73988	3.0552	2.3424	5.79357	3.56454	1.71146	3.70158	5.00903	1.40251	1.36833	1.95684	4.67066	81.6407	11.1605	0	0	5.30213	13.9415	0	5.33107	2.84204	4.18369
BOLA1	7.17699	8.18764	19.8323	6.93022	3.10209	5.99697	2.6006	14.7615	0	7.49495	14.2708	5.49208	15.7838	2.95915	0	4.87951	6.25015	3.05981	16.6568	8.92834	4.99137	4.98561	3.5594	8.48687	8.5901	3.50823	0	5.47868	7.1288	3.34629	4.90922	4.0237	4.50439	3.70158	3.85941	6.89808	5.67857	4.55664	7.61521	0	0	14.3285	0	10.6043	6.97077	12.982	10.6621	5.68408	7.43767
SV2A	6.28323	67.9574	0	4.85115	0	58.4704	2.6006	23.9875	0	5.99596	62.0042	3.84446	0	10.8502	24.5737	9.44465	8.10799	0.899943	7.24208	4.46417	3.63954	2.45385	20.1699	4.09454	1.71802	17.5412	0	2.43497	5.092	3.01166	55.8219	186.218	308.388	11.1048	135.654	213.511	581.335	174.969	21.6272	0	11.1605	0	117.362	0	14.2446	0	4.2335	17.0522	17.1996
SF3B4	15.0701	28.2473	59.4969	15.9395	12.4084	22.4886	14.7367	29.5231	24.4713	9.74344	17.7155	14.9385	0	19.7276	0	7.47644	10.5966	6.47959	10.8631	6.91029	5.51131	6.77731	13.0511	7.18406	6.87208	7.01646	0	11.5661	7.1288	4.35017	13.5715	10.2506	9.26078	5.87899	8.04729	10.8242	9.98881	8.83374	21.6272	0	11.1605	0	0	5.30213	17.8815	12.982	16.7772	19.8943	15.5726
MTMR11	11.9688	2.29254	0	2.77209	0	1.49924	0.866866	1.84519	0	9.18132	1.96839	2.85588	0	0	0	4.33278	1.68009	0.719955	13.0357	1.10075	1.45582	0.506351	0	2.64284	0	0	6.49101	0	2.0368	1.00389	4.06369	0.958598	0.482989	0.21774	0.574806	2.28505	1.77883	0.642962	2.03072	0	0	0	0	0	2.72769	6.49101	1.72476	8.52612	18.3618
OTUD7B	65.729	23.6623	39.6646	47.8185	27.9188	43.478	1.73373	55.3558	122.356	49.6541	20.6681	38.1151	110.487	7.89106	24.5737	56.3672	52.874	1.07993	31.1409	69.2252	41.6988	80.0814	9.49173	71.5801	13.7442	23.6806	38.946	11.5661	65.1776	61.237	48.7557	42.6455	41.306	1.52418	61.6685	33.0259	60.8907	42.2678	44.2698	0	55.8025	0	0	0	41.5215	38.946	44.2165	31.2624	44.3936
VPS45	81.5528	60.7523	79.3292	31.186	46.5314	37.481	75.4173	57.2009	122.356	77.0106	74.3066	56.0193	11.8379	33.537	65.5299	79.1519	51.5953	38.1576	45.6251	48.0051	51.6815	76.1084	64.0692	74.4462	73.8749	86.8287	58.4191	93.7464	103.877	142.217	126.993	128.368	161.948	94.9348	171.128	179.503	174.873	129.599	30.9685	40.8203	66.963	57.314	0	90.1362	48.1892	58.4191	64.6001	53.9987	68.7985
PLEKHO1	13.0564	46.8333	0	3.46511	49.6335	101.948	139.565	51.6654	0	24.7333	16.2392	49.2091	15.7838	52.2783	139.251	40.1568	46.3428	194.208	30.4167	9.78448	53.0333	1.9475	43.8993	6.73739	41.2325	122.788	38.946	62.7005	21.3864	47.8519	26.8152	46.9713	53.1077	104.298	30.2184	58.8913	55.6911	58.6493	18.2765	40.8203	0	0	234.724	196.179	19.3969	38.946	107.249	53.9987	14.8753
ANP32E	21.7194	31.2768	19.8323	59.5999	21.7146	50.9742	25.1391	36.9038	48.9425	18.7374	16.7313	18.1239	110.487	82.8561	73.7212	26.8305	46.8245	25.3784	36.2104	37.9149	22.6691	46.1948	20.1699	25.3862	36.0784	22.8035	32.455	17.0448	9.1656	8.36572	26.9791	20.6219	11.8962	10.6693	11.4961	11.3251	8.82573	19.9318	26.3994	0	11.1605	0	0	5.30213	52.7354	25.964	26.6554	31.2624	19.5239
CA14	0.50072	0.409382	0	0.693022	0	0	0	5.53558	0	0.749495	0.492097	0.219683	0	0	0	0.218689	2.63768	0.179989	0	0.489224	0.103987	0.350551	1.18647	6.21626	1.71802	0	0	0.608743	0	0.334629	8.87801	6.99616	6.55185	0.21774	3.69518	0.796666	0.820998	2.62776	0.710753	0	0	0	0	0	0.606154	0	6.42865	0	0
APH1A	30.5386	27.9198	19.8323	24.9488	9.30628	34.4826	45.077	62.7365	48.9425	25.2955	27.5574	39.2135	15.7838	23.6732	16.3825	17.0578	20.981	31.858	46.3493	34.3068	28.5964	14.1778	16.6105	41.3921	20.6162	15.787	19.473	16.4361	7.1288	22.7547	25.9913	15.1362	17.7026	19.3789	22.3353	23.1081	21.8249	17.6395	39.7006	0	22.321	42.9855	0	21.2085	33.9446	19.473	31.0457	17.0522	42.7666
C1orf54	30.8347	1.47377	19.8323	4.15813	6.20418	0	18.2042	5.53558	0	16.4889	2.95258	7.79876	0	1.97276	16.3825	20.2424	9.11719	12.7792	22.4504	3.48572	31.716	2.1812	4.74587	8.74743	6.87208	0	0	77.3103	13.2392	31.7897	19.7879	2.53747	1.09197	10.0161	0.739037	2.97199	10.0572	0.894556	105.395	0	0	0	0	37.1149	4.54615	6.49101	3.60631	25.5784	20.9185
C1orf51	2.7082	0.655011	0	0	0	0	0.866866	0	0	0.936869	3.93677	0.109842	0	0	0	0.99777	2.45992	0.179989	2.17262	1.71228	0.623922	0.389501	0	1.11669	0	0	0	0	0	0.334629	1.57889	2.54552	1.62746	1.95966	2.05288	3.04832	3.96816	1.11819	2.13226	0	0	0	0	0	0	0	1.56796	0	0.232427
MRPS21	51.2135	50.2721	0	46.4325	24.8167	40.4795	26.8728	36.9038	0	40.2854	46.7492	38.0052	19.7298	44.3872	32.765	41.6603	43.7052	44.2772	82.5597	44.0913	45.8582	44.8705	40.3399	47.4595	34.3604	23.6806	19.473	38.9595	30.552	33.1282	28.0749	31.1987	29.5988	20.9031	25.7842	45.3909	49.4652	26.1658	42.4421	0	55.8025	57.314	0	5.30213	52.4323	19.473	94.8617	42.6306	25.3346
PRPF3	31.7284	28.3292	19.8323	22.1767	9.30628	28.4856	24.2722	25.8327	24.4713	33.5399	38.3835	31.9639	39.4596	42.4144	90.1037	45.8154	41.0962	20.5187	34.762	28.0692	40.8669	63.8781	49.8316	44.5189	77.3109	39.4676	32.455	26.1759	40.736	46.848	39.304	41.3244	40.319	26.1288	35.8022	46.6169	50.1493	43.0225	26.1963	40.8203	22.321	28.657	0	26.5106	32.7323	25.964	17.2476	19.8943	29.0534
RPRD2	140.202	122.896	79.3292	70.6882	74.4502	64.4674	108.358	84.8788	220.241	138.282	207.173	114.126	82.8652	99.6246	57.3387	133.947	158.651	108.713	117.322	147.012	136.951	216.251	191.021	213.847	243.959	117.526	149.293	158.882	212.846	219.516	233.788	251.064	263.355	170.055	270.077	231.649	279.618	281.589	102.247	81.6407	89.284	186.271	117.362	132.553	110.623	71.4011	90.3147	136.418	122.954
TARS2	19.2104	22.516	0	31.186	37.2251	32.9833	21.6716	12.9163	24.4713	15.7394	15.255	10.5448	47.3515	15.7821	16.3825	18.7116	19.7138	17.6389	18.8294	17.979	12.5824	29.1736	21.3564	28.5501	36.0784	29.82	19.473	31.6546	26.4784	16.3968	17.9199	19.3371	23.4879	15.895	30.2184	35.559	41.1868	20.1834	14.3166	285.742	11.1605	14.3285	0	26.5106	22.1246	19.473	23.6762	8.52612	15.1078
ECM1	2.34746	2.37441	19.8323	2.07907	0	10.4947	1.73373	0	0	32.2283	1.47629	21.529	0	0	24.5737	24.5752	1.20989	1.6199	7.24208	0.183459	13.3103	3.85606	8.30527	9.52912	1.71802	4.38529	0	8.5224	511.237	148.91	1.1475	1.52651	2.26795	0.870961	2.62769	4.46038	5.47332	1.39774	243.687	0	0	0	0	5.30213	1.81846	6.49101	3.44952	19.8943	5.81068
ADAMTSL4	1.24372	0.491258	138.826	10.3953	0	5.99697	15.6036	1.84519	0	45.5318	0.984193	0.549208	11.8379	0	0	6.64269	0.957592	3.59977	120.218	1.16191	0.103987	8.99747	1.18647	16.7132	5.15406	1.75412	45.437	38.3508	3.0552	2.67703	0.25452	0.294024	0.262494	2.61288	0.246346	0.372096	0.136833	0.167729	0.507681	0	11.1605	0	0	5.30213	11.2138	6.49101	16.934	0	176.18
ADAMTSL4-AS1	0.0538409	0	0	0	0	0	0	0	0	0.187374	0	0.109842	0	0	0	0.328034	0.326843	1.07993	0	0.61153	0	0.19475	0	0.111669	0	0	0	0.608743	0	2.00777	0.138045	0.0966654	0.0629985	0.653221	0.574806	0.20513	0	0.0559097	0	0	0	0	0	0	0	0	0	0	0
MCL1	58.1428	68.6124	59.4969	44.3534	120.982	82.4583	112.693	125.473	24.4713	76.8233	56.099	69.42	23.6758	123.298	81.9124	86.1226	82.5822	171.169	125.288	109.28	58.6486	24.928	32.0346	64.1727	30.9244	43.8529	64.9101	88.8764	32.5888	25.4318	31.7762	32.834	24.4959	43.9835	32.107	26.0419	19.0882	24.2369	117.579	122.461	44.642	114.628	0	68.9277	88.1954	58.4191	128.259	59.6828	78.5604
ENSA	87.9545	92.9297	198.323	97.7161	127.186	128.935	69.3493	62.7365	73.4138	86.9415	140.248	65.5755	114.433	109.488	131.06	120.717	199.552	150.65	128.185	163.34	96.2919	125.03	115.087	117.178	151.186	159.624	168.766	82.789	126.282	74.6222	153.213	141.264	191.085	56.6125	139.514	234.339	172.683	135.693	83.9704	0	78.1235	100.3	0	47.7192	125.171	90.8741	54.4083	99.4714	108.079
GOLPH3L	45.1887	18.0947	79.3292	39.5022	15.5105	34.4826	39.8758	25.8327	97.885	23.047	26.0811	24.275	31.5677	9.86382	65.5299	16.511	19.3181	10.0794	18.1052	31.4327	15.702	68.9416	58.1369	44.3327	32.6424	54.3776	58.4191	70.6142	47.8648	41.1593	30.8315	21.5443	24.8739	34.6207	18.7223	25.8177	31.2664	20.1555	21.3226	0	44.642	14.3285	0	21.2085	20.3062	6.49101	19.7563	22.7363	25.1022
HORMAD1	0.839918	1.22815	0	0	0	0	5.2012	5.53558	0	0.187374	0.492097	1.09842	0	2.95915	0	14.1875	6.07239	12.4192	1.44842	5.0757	13.5183	0.623201	5.93233	1.37726	3.43604	0	0	40.7858	0	1.67314	0.698852	0.942487	1.08147	4.57255	0.410576	2.29459	10.1941	0.810691	0.101536	0	0	0	0	0	0.909231	0	1.09757	8.52612	0.697282
CTSS	10.542	4.01194	0	9.00928	77.5523	8.99545	415.229	1.84519	0	5.24647	3.93677	4.50351	11.8379	48.3327	139.251	3.212	1.21563	236.145	7.96628	17.3675	0.935882	5.60881	75.9339	7.22129	72.1568	7.89352	12.982	601.438	13.2392	11.3774	1.74282	3.68939	3.50692	205.111	1.14961	12.3793	37.5607	1.90093	9.13825	0	33.4815	28.657	0	318.128	2.12154	0	3.76311	8.52612	5.81068
CTSK	6.64397	3.76631	0	0.693022	0	8.99545	3.46746	7.38077	0	22.8596	4.42887	1.75747	0	0.986382	0	15.4176	2.69502	1.25992	50.6945	2.93534	2.18373	4.28451	1.18647	3.31286	0	6.1394	6.49101	3.65246	7.1288	7.0272	2.5452	2.37233	2.56194	2.83062	4.26999	3.7782	10.3309	2.96322	23.3533	0	11.1605	0	0	0	3.33385	12.982	8.62379	14.2102	157.586
ARNT	44.7956	43.5582	79.3292	38.8092	27.9188	37.481	52.012	46.1298	48.9425	60.3344	58.5595	38.4446	23.6758	34.5234	90.1037	66.2492	39.6282	41.9374	69.5239	35.958	36.6034	86.7808	29.6617	62.7582	37.7964	61.394	64.9101	86.4415	82.4904	75.6261	50.3821	48.381	46.0414	77.0801	40.647	51.1918	84.2892	51.9401	38.2791	81.6407	33.4815	57.314	0	53.0213	44.5523	45.437	41.3942	51.1567	60.1987
SETDB1	48.6399	45.9326	59.4969	31.186	27.9188	29.9848	60.6806	35.0586	97.885	51.5278	36.9072	37.7855	31.5677	21.7004	32.765	49.5468	51.1881	36.3577	33.3135	38.5264	43.0506	64.5013	85.4256	61.9765	70.4388	55.2546	64.9101	80.9628	59.0672	76.9646	58.5957	59.3807	63.261	53.9996	58.3839	78.5169	76.4897	64.408	29.3439	81.6407	33.4815	14.3285	0	37.1149	40.6123	51.928	37.0039	36.9465	38.1181
CERS2	119.774	70.3318	39.6646	76.2324	31.0209	152.923	39.009	112.557	48.9425	59.7722	66.433	64.6968	59.1894	37.4825	73.7212	21.3632	28.2059	21.2387	34.0378	17.3675	26.3087	49.6613	29.6617	149.935	30.9244	64.9023	38.946	21.9147	37.6808	10.3735	17.2038	10.3714	7.47582	19.5966	19.4613	14.3495	16.8305	10.7067	68.8415	122.461	55.8025	14.3285	117.362	5.30213	37.5815	45.437	20.6971	36.9465	37.8857
ANXA9	0.839918	1.06439	0	0.693022	0	1.49924	2.6006	1.84519	0	0.562121	0.984193	0.329525	0	0.986382	0	0.669736	1.07227	1.79989	0.724208	13.576	0.519935	0.740051	0	23.1156	1.71802	5.26235	6.49101	0.608743	2.0368	1.00389	0.832583	0.519576	0.556487	1.0887	1.23173	0.901616	1.29991	0.726826	1.82765	0	0	0	0	0	0.303077	0	1.09757	0	0.929709
FAM63A	8.89452	10.4802	0	5.54417	3.10209	40.4795	2.6006	9.22596	24.4713	9.36869	10.8261	5.93145	3.94596	6.90468	16.3825	9.28063	8.44057	6.83957	4.34525	21.4647	8.83889	5.25826	10.6782	15.0009	0	40.3446	19.473	6.08743	10.184	11.3774	13.3817	7.06463	6.89834	4.35481	17.4905	5.85335	10.4677	10.0078	31.9839	0	33.4815	0	0	0	7.27385	19.473	7.99661	17.0522	10.9241
PRUNE	10.2244	13.3458	0	7.62324	9.30628	53.9727	6.93493	3.69038	48.9425	12.554	11.8103	9.55623	3.94596	22.6868	8.19124	14.0918	12.2079	8.27948	16.6568	20.4863	8.63091	15.0347	20.1699	35.1386	18.8982	82.4434	25.964	15.8273	22.4048	12.3813	13.4119	13.3962	17.3351	10.6693	9.52536	22.6835	18.8145	15.1515	10.2552	40.8203	22.321	14.3285	0	5.30213	12.7292	19.473	18.0316	8.52612	9.76195
BNIPL	0.769925	0.736887	0	2.77209	0	4.49773	0	3.69038	0	0.562121	0.984193	0.549208	0	0	0	1.46249	1.47366	1.25992	2.89683	14.6767	1.35183	2.72651	1.18647	3.8712	0	14.91	6.49101	1.21749	2.0368	2.3424	1.72556	1.4379	1.78496	0.870961	0.985382	2.73824	2.25775	1.28592	1.31997	0	0	0	0	0	1.21231	0	1.25437	0	0.697282
C1orf56	9.99287	13.1002	0	4.85115	0	13.4932	5.2012	18.4519	24.4713	9.93081	12.7945	7.24955	0	3.94553	0	4.7975	4.36937	1.79989	9.4147	4.46417	4.05549	1.3243	2.37293	7.10962	8.5901	3.50823	6.49101	5.47868	2.0368	2.00777	12.273	11.338	11.2032	8.27413	14.1238	12.5415	12.5886	11.4894	18.8857	40.8203	0	14.3285	117.362	0	10.0015	19.473	6.58544	0	13.2484
CDC42SE1	56.9583	54.4478	158.658	22.1767	105.471	89.9545	57.2132	83.0336	24.4713	48.9046	30.51	53.7126	0	92.7199	32.765	30.9719	20.4707	45.1772	28.2441	32.8392	31.1961	11.0229	17.797	20.5099	46.3865	55.2546	25.964	39.5683	51.9384	29.4473	25.6246	41.2157	36.3921	59.8786	45.7382	52.1077	68.8955	33.9931	53.3065	40.8203	22.321	57.314	0	79.5319	31.2169	103.856	45.1573	19.8943	19.2915
MLLT11	17.3906	290.252	19.8323	4.15813	15.5105	13.4932	6.06806	44.2846	24.4713	12.7414	42.3203	6.5905	0	7.89106	8.19124	15.3356	15.3329	2.33985	18.1052	2.69073	6.75915	1.8696	3.5594	6.66294	3.43604	0	0	2.43497	7.1288	2.67703	37.0694	141.864	132.381	16.1128	44.2601	133.792	150.858	134.631	42.1375	0	0	0	0	0	5.15231	0	28.6937	17.0522	12.3186
GABPB2	46.497	23.4985	19.8323	65.144	37.2251	26.9864	35.5415	38.749	0	68.3914	59.0516	33.5017	142.055	39.4553	65.5299	54.481	51.0276	43.5573	45.6251	63.538	41.5948	161.37	32.0346	67.8578	79.0289	37.7135	103.856	60.8743	98.7848	55.2137	64.4713	38.5816	44.267	35.9271	46.5593	48.3533	30.4454	45.0073	23.5564	0	11.1605	0	0	26.5106	33.0354	38.946	27.2826	42.6306	33.4695
SEMA6C	2.6059	27.3467	0	4.15813	0	13.4932	4.33433	9.22596	0	11.9919	13.7787	38.884	0	5.91829	32.765	19.477	19.1404	3.95975	24.6231	6.29876	51.5775	7.71211	2.37293	39.2704	17.1802	13.1559	6.49101	1.82623	8.1472	17.4007	14.9736	52.1792	54.3152	3.2661	27.1801	30.7027	41.5288	70.9774	45.3867	0	11.1605	0	0	5.30213	11.82	19.473	99.8792	11.3682	37.8857
TNFAIP8L2	0.0861454	0.245629	0	1.38604	12.4084	10.4947	19.9379	0	0	0	0.492097	0.329525	0	20.714	16.3825	0.0273362	0.068809	30.7781	0	0	0.207974	0.701101	3.5594	0.59557	3.43604	6.1394	0	22.5235	0	0	0	0	0	0	0	0	0	0	0	0	0	42.9855	117.362	10.6043	0	0	0	0	0.232427
SCNM1	8.17843	11.6264	0	9.00928	18.6126	11.9939	30.3403	18.4519	24.4713	8.24445	5.41306	8.23813	7.89192	14.7957	0	7.7088	8.79035	33.2979	7.96628	6.48222	7.48706	10.3997	23.7293	7.33296	5.15406	14.91	0	22.5235	0	3.34629	7.18265	7.5399	8.5048	12.8467	7.96517	10.3471	12.8623	8.10691	9.64593	0	11.1605	0	0	37.1149	12.1231	6.49101	20.3835	14.2102	4.64855
LYSMD1	6.38553	10.6439	0	1.38604	6.20418	1.49924	2.6006	1.84519	24.4713	5.05909	8.85774	3.18541	7.89192	0.986382	0	5.68592	4.70195	0.899943	3.62104	3.73033	1.97575	2.5707	0	5.84403	1.71802	0	0	3.04371	1.0184	6.35794	4.86608	5.23201	6.75134	1.0887	4.76268	7.96189	7.4574	6.20598	4.87374	0	0	0	0	0	4.24308	0	8.78059	5.68408	4.41612
TMOD4	0.705316	0.0818764	0	0	3.10209	1.49924	0.866866	1.84519	0	0.374748	0	0.439367	0	0	0	0.669736	1.14682	0	2.17262	0.733836	1.35183	2.1033	4.74587	0.632793	0	4.38529	0	1.82623	0	3.01166	0.746305	1.05929	0.640485	0.653221	0.656922	1.40251	1.642	0.866601	0.406145	0	0	0	0	0	3.03077	0	4.2335	0	0.929709
VPS72	13.8748	24.7267	118.994	21.4837	9.30628	11.9939	13.003	18.4519	24.4713	13.6783	9.84193	15.268	3.94596	6.90468	24.5737	12.602	18.7791	9.17942	14.4842	14.2487	11.9585	16.8654	23.7293	14.2192	34.3604	9.64763	12.982	10.9574	13.2392	12.3813	18.3211	20.6985	21.073	9.36283	14.1238	27.7831	24.972	20.407	22.8456	40.8203	0	28.657	0	10.6043	20.3062	32.455	26.0282	14.2102	11.8538
PIP5K1A	91.158	38.7275	138.826	29.1069	55.8377	49.475	74.5505	60.8913	122.356	68.5788	81.688	46.6827	23.6758	48.3327	49.1475	95.5673	99.4404	82.0748	86.9049	81.8839	74.9746	54.4522	104.409	96.8173	106.517	54.3776	123.329	97.3988	118.134	98.7155	82.5681	77.6465	79.9451	110.612	90.9015	121.799	119.387	69.9151	41.8329	0	44.642	42.9855	0	53.0213	47.5831	77.8921	52.0564	45.4726	58.5717
PSMD4	42.8035	37.4175	19.8323	46.4325	40.3272	50.9742	29.4734	44.2846	24.4713	27.3566	32.4784	22.6274	71.0273	39.4553	49.1475	25.3543	30.4021	20.3387	32.5893	24.2777	29.8442	45.4547	35.594	51.5913	25.7703	35.9594	6.49101	33.4808	36.6624	27.1049	27.7211	29.7367	31.3208	22.2095	27.8371	40.8494	44.6076	25.4948	33.2023	0	11.1605	42.9855	0	42.417	37.2785	38.946	48.7636	11.3682	21.1509
RP11-126K1.2	0.543793	0.327505	0	0	0	0	0	0	0	0.374748	0	0.549208	0	0	0	0.191353	0.172022	0	0	0.489224	0.519935	0.2337	0	1.4517	0	0.877058	0	0	0	0	0	0	0	0	0	0	0	0	0	0	0	0	0	0	0.303077	0	0.156796	0	0.232427
ZNF687	9.13142	12.2815	39.6646	2.07907	9.30628	13.4932	14.7367	11.0712	0	9.55606	6.39725	8.67749	3.94596	8.87744	32.765	5.87728	10.5048	7.37953	13.0357	11.3745	6.86314	6.03726	9.49173	15.7082	6.87208	5.26235	19.473	3.04371	6.1104	5.68869	10.6381	6.60547	5.50187	5.00803	9.27902	4.26002	3.21558	5.53506	11.8797	0	0	0	0	21.2085	13.0323	12.982	13.9549	14.2102	13.0159
PI4KB	64.8944	31.1949	39.6646	40.1953	34.123	29.9848	62.4143	31.3683	24.4713	46.6561	44.2887	30.6458	59.1894	39.4553	57.3387	36.6988	28.2002	34.3778	39.8314	40.361	25.8927	73.8104	51.0181	54.2713	53.2586	39.4676	45.437	85.8327	53.9752	54.2098	36.9701	31.0699	41.1905	48.7738	47.7089	44.8661	46.1812	31.5331	34.5223	40.8203	78.1235	14.3285	0	53.0213	47.28	58.4191	36.3767	56.8408	48.1125
RFX5	8.43149	10.8077	0	8.31626	6.20418	11.9939	5.2012	14.7615	0	8.05707	13.2866	6.70034	7.89192	17.7549	0	9.55399	10.631	16.9189	10.1389	6.97144	11.9585	5.68671	10.6782	5.54625	13.7442	2.63117	6.49101	10.3486	5.092	4.6848	6.05672	6.44033	5.14488	6.53221	7.5546	2.88613	2.87349	3.24276	9.84901	0	11.1605	28.657	0	26.5106	14.8508	25.964	11.1325	11.3682	7.43767
SELENBP1	2.49822	2.04691	0	411.655	3.10209	11.9939	9.53553	3.69038	0	18.3626	3.44468	1.53778	694.489	0	0	17.4405	4.29483	1.6199	36.9346	4.52532	0.727908	391.37	58.1369	73.0318	44.6685	22.8035	220.694	113.835	44.8096	23.7586	3.00679	0.704852	0.356992	12.8467	0.492691	0.424571	0.410499	0.503188	3.95991	449.024	0	0	0	0	8.78923	19.473	12.5437	25.5784	24.6373
PSMB4	109.119	93.1753	138.826	100.488	102.369	100.449	61.5475	84.8788	48.9425	76.8233	81.688	74.912	82.8652	86.8017	16.3825	38.2023	41.3255	47.337	75.3176	45.6813	45.3383	43.3125	34.4075	78.1313	37.7964	36.8364	51.928	28.6109	20.368	19.7431	28.6012	31.6821	33.3367	19.8144	25.2915	35.6592	36.2608	25.6626	75.6444	163.281	122.766	28.657	234.724	79.5319	92.4385	116.838	117.911	59.6828	45.7882
POGZ	159.121	153.436	0	70.6882	89.9607	76.4613	118.761	119.937	195.77	175.757	192.902	148.506	106.541	87.788	40.9562	162.76	162.257	92.8741	111.528	139.001	155.044	170.368	182.716	162.032	188.982	103.493	194.73	151.577	204.698	196.092	227.459	205.797	244.329	149.152	205.206	202.625	244.589	239.517	91.1795	40.8203	55.8025	85.971	117.362	137.855	157.903	142.802	114.618	130.734	139.456
CGN	5.73406	3.35693	19.8323	1.38604	0	0	0	5.53558	0	1.68636	5.41306	0.329525	0	1.97276	0	0.410043	5.12053	0.179989	2.17262	31.4327	1.45582	1.75275	1.18647	63.8749	3.43604	0	233.676	1.21749	4.0736	1.00389	2.83423	4.45063	5.58587	0.653221	2.38134	7.79492	9.71515	5.1996	0.812289	0	0	0	0	5.30213	3.33385	0	0.470389	0	0.232427
TUFT1	7.77463	6.95949	39.6646	3.46511	0	0	1.73373	1.84519	24.4713	2.43586	2.95258	0.549208	0	0	0	0.820085	3.93358	0.359977	0	17.2452	0.415948	0.973752	1.18647	3.90843	0	0	12.982	0	3.0552	0.334629	1.48398	3.77398	5.47037	0.21774	2.87403	4.30772	9.03098	4.83619	0.913825	0	0	0	0	0	1.81846	0	7.05583	0	5.57826
SNX27	46.1578	54.939	99.1615	21.4837	34.123	35.9818	104.891	49.8202	73.4138	46.8435	52.6543	35.369	3.94596	28.6051	40.9562	44.7493	42.1226	62.636	55.0398	43.0517	41.9067	27.5377	48.6451	44.6305	51.5406	17.5412	51.928	82.789	50.92	40.8247	65.7784	77.4571	83.8615	69.4591	79.4875	102.531	107.688	82.1034	52.5957	81.6407	22.321	14.3285	0	68.9277	42.4308	64.9101	58.9554	45.4726	57.1771
CELF3	0.629939	28.2473	0	0.693022	3.10209	0	0	0	0	1.31162	22.1443	0.549208	0	0	0	0	0.0745431	0	0	0.122306	0	0.506351	0	1.19114	0	0	0	0	0	0	2.92051	17.4803	24.3699	0.870961	7.14402	26.8434	24.0142	21.9725	2.13226	0	0	0	0	5.30213	0.606154	0	1.88156	0	0.929709
RIIAD1	0.0161523	0.573135	0	0	0	0	0	0	0	0.187374	0.492097	0	0	0	0	0.0410043	0.0114682	0	0	0.183459	0	0	0	0	0	0	0	0	0	0	0.0819641	0.100693	0.115497	0	0.0821152	0.214671	0.478916	0.111819	0	0	0	0	0	0	0	0	0.783981	0	0
MRPL9	16.1469	23.5804	39.6646	16.6325	12.4084	28.4856	12.1361	11.0712	0	14.4278	15.7471	19.442	15.7838	28.6051	0	10.8525	14.8169	11.8793	29.6925	10.5183	13.1024	9.15327	7.1188	13.7353	6.87208	2.63117	19.473	6.69617	3.0552	2.67703	10.211	11.1205	7.12933	4.79029	9.1969	11.8403	11.9045	9.50465	25.181	0	0	28.657	117.362	21.2085	26.6708	32.455	35.9063	14.2102	15.5726
OAZ3	0.269205	0.0818764	0	0	0	0	0	0	0	0.187374	0	0.329525	0	0	0	0.150349	0.229363	0.179989	0	0.428071	0.415948	0.19475	0	0.260562	0	0	0	0.608743	0	0.334629	0.310601	0.394717	0.43049	0	0.0821152	0.324391	0.273666	0.615007	0.507681	0	0	0	0	0	0.303077	0	0.627185	0	0.464855
TDRKH	3.52658	9.41578	0	4.85115	0	11.9939	12.1361	3.69038	0	0.187374	10.8261	2.19683	0	14.7957	16.3825	0.724409	3.51499	6.65958	2.17262	7.39951	1.97575	4.08976	9.49173	10.348	6.87208	7.89352	19.473	20.0885	1.0184	3.68092	10.5259	16.7271	18.0911	4.57255	16.6694	19.7354	18.2672	16.1859	7.81828	0	22.321	0	0	0	2.72769	0	4.3903	0	2.78913
RORC	0.102298	0.491258	0	0	18.6126	0	0	0	0	0.187374	4.92097	0.549208	0	3.94553	0	0.123013	0.240831	0	0.724208	2.20151	0.207974	0.11685	0	2.34506	6.87208	0	0	0	0	0.334629	0.0647085	0.330273	0.209995	0	0	0.462734	0.410499	0.223639	0	0	0	100.3	0	0	0.303077	0	10.6621	0	0.232427
THEM4	44.5587	38.0725	79.3292	16.6325	27.9188	11.9939	21.6716	40.5942	48.9425	23.6091	45.765	23.9455	0	29.5915	40.9562	20.7208	29.2381	17.2789	17.381	44.8863	19.2376	30.3032	54.5775	48.1295	24.0523	36.8364	19.473	43.8295	27.4968	57.5561	12.6613	25.6485	48.1414	17.637	46.5593	38.1446	81.2104	35.1952	6.80292	0	78.1235	71.6425	0	42.417	20.3062	32.455	29.0073	14.2102	15.8051
S100A10	11.9311	9.0064	99.1615	11.7814	37.2251	10.4947	32.074	149.461	24.4713	68.5788	7.38145	135.654	3.94596	49.3191	32.765	4.00475	12.3283	37.0777	296.925	63.4768	124.888	5.92041	7.1188	76.3074	12.0261	3.50823	493.316	17.6535	24.4416	20.747	0.427076	0.563881	0.335992	0.435481	0.410576	1.64581	2.0525	0.391368	51.6819	0	435.26	0	0	63.6256	66.6769	123.329	70.7151	28.4204	191.288
S100A11	49.5552	19.1591	237.988	14.5535	49.6335	5.99697	123.962	81.1884	24.4713	83.9435	14.2708	66.3444	15.7838	58.1966	114.677	58.8274	27.5351	219.586	207.848	370.587	81.8377	2.76546	5.93233	11.6881	6.87208	0.877058	19.473	51.1344	23.4232	13.3851	1.16475	0.84985	0.818981	47.6851	1.23173	1.1783	1.02625	0.615007	90.7733	0	66.963	14.3285	117.362	74.2298	36.0662	64.9101	91.4122	96.6293	146.197
HRNR	0.129218	0	0	0	0	0	0	0	0	0.187374	0	0	0	0	0	0.0410043	0.0802771	0	0	0	0	0	0	0	0	0	0	0	0	0	0	0	0	0	0	0	0	0	0	0	0	0	0	0	0	0	0	0	0
FLG	0.877607	0.327505	0	0	0	0	0.866866	0	0	1.68636	0.492097	0.109842	0	0	0	0.314366	0.332577	0	0	0.244612	0	0.2337	0	0.335008	0	0.877058	0	0	1.0184	0	0.703166	0.765267	0.787481	0	0.16423	0.758502	1.16308	0.531142	0	0	0	0	0	0	0	0	0	0	0
SPRR2B	3.96269	0.736887	0	2.77209	0	0	0.866866	0	0	1.49899	0	0.219683	0	0	0	0.0546723	0.131884	0	0.724208	0.550377	0.519935	0.1558	0	0.111669	0	0	6.49101	0	0	0.334629	0.0690224	0.362495	0.178496	0	0.328461	0.190818	0.410499	0.0279549	0.101536	0	0	0	0	0	0	0	0	0	0
S100A9	0.193827	0.491258	79.3292	0.693022	0	0	13.003	0	0	0.374748	0	0.109842	0	0.986382	32.765	0.0820085	0.177757	65.5159	0	0.917295	0.207974	0.545301	1.18647	1.48892	1.71802	0	0	10.9574	1.0184	1.00389	0.0690224	0.136943	0.0314993	7.18543	0	0.0858682	0.136833	0.0559097	0.304608	0	0	0	0	74.2298	0.909231	0	0.783981	0	0.929709
S100A12	0.220748	0.0818764	0	0	0	0	0	0	0	0	0	0	0	0	0	0	0.0114682	5.03968	0	0.061153	0	0.0389501	0	0.297785	0	0.877058	0	1.21749	0	0.334629	0	0	0	0	0	0	0	0	0	0	0	0	0	0	0	0	0.313593	0	0
S100A8	0.0646091	0.409382	19.8323	0.693022	0	0	8.66866	0	0	0.374748	0.984193	0	0	0	8.19124	0.191353	0.114682	57.4164	0	0.244612	0.103987	1.05165	5.93233	2.08449	1.71802	0	6.49101	13.3923	2.0368	1.00389	0	0	0	0	0	0	0	0	0	0	0	0	0	31.8128	0.303077	6.49101	0.940778	0	1.16214
S100A6	4.24266	83.5139	99.1615	176.721	31.0209	116.941	46.8108	162.377	0	61.8334	59.0516	27.0211	315.677	91.7336	98.2949	18.4109	24.5763	87.6545	473.632	926.774	191.648	175.548	17.797	51.4424	27.4883	44.7299	64.9101	34.0896	19.3496	16.7314	12.4672	12.8082	10.2058	5.66125	10.2644	14.3209	9.9204	8.77783	6.59985	204.102	111.605	14.3285	0	79.5319	317.625	285.604	132.65	39.7885	301.691
S100A4	0.823766	2.62004	0	127.516	52.7356	146.926	83.2191	42.4394	0	8.24445	0.984193	1.20826	138.109	128.23	131.06	1.13445	2.21909	137.691	105.734	36.4472	15.4941	128.925	41.5263	40.1638	32.6424	62.2711	19.473	65.7442	12.2208	9.3696	0.129417	0.350412	0.157496	5.22577	0	0.133573	0.273666	0.167729	0.304608	163.281	0	128.957	0	227.992	136.385	32.455	116.656	19.8943	114.587
S100A2	0.102298	0.0818764	0	0	0	1.49924	0.866866	1.84519	0	0	0	0.109842	0	0	0	0.0956766	0.43579	0	0	21.7093	0.831895	0.19475	1.18647	0.111669	0	0	0	0	0	0	0.185498	0.314162	0.0524988	0	0	0.10495	0	0.111819	0.304608	0	0	0	0	0	0.606154	0	1.09757	2.84204	0.232427
S100A16	4.65185	1.80128	0	2.77209	9.30628	2.99848	5.2012	57.2009	0	17.9879	3.93677	129.613	0	0	0	4.55147	6.73181	0.719955	27.5199	24.0331	83.8135	1.8696	1.18647	29.5924	1.71802	0.877058	51.928	4.2612	7.1288	28.4434	9.97805	0.922349	1.21797	0.21774	2.135	1.19738	1.36833	1.36979	118.188	0	245.531	0	0	5.30213	15.4569	58.4191	16.15	5.68408	23.7076
S100A13	18.0098	11.7083	0	3.46511	9.30628	5.99697	7.80179	16.6067	0	16.4889	7.87354	21.1994	0	0	8.19124	17.0031	40.7005	5.21967	49.9703	45.9871	21.4213	2.06435	4.74587	20.6961	8.5901	3.50823	6.49101	0.608743	11.2024	14.7237	7.29481	2.43274	3.29692	7.62091	1.39596	1.65058	3.14716	2.99117	31.0701	40.8203	22.321	14.3285	0	5.30213	16.3662	12.982	38.1015	11.3682	28.5886
CHTOP	29.5479	36.6806	19.8323	25.6418	21.7146	37.481	29.4734	25.8327	48.9425	31.1041	23.6206	25.3734	27.6217	30.5779	24.5737	30.0151	38.3037	29.8781	28.9683	30.6377	27.5565	40.8197	24.9158	28.4757	29.2063	29.82	12.982	22.5235	26.4784	19.4085	32.5743	27.1912	30.4283	18.0724	31.4501	40.5536	33.6609	25.998	30.1562	0	22.321	42.9855	0	37.1149	46.6739	32.455	53.1539	28.4204	25.567
SNAPIN	15.2585	18.6678	0	13.1674	12.4084	4.49773	8.66866	16.6067	24.4713	13.8657	10.334	13.6204	23.6758	10.8502	0	5.82261	7.99331	8.27948	9.4147	6.84914	6.86314	5.18036	3.5594	12.4697	3.43604	7.01646	12.982	4.86994	5.092	4.01554	9.08939	6.08589	6.07936	4.57255	9.44325	8.29582	6.97849	5.95439	15.6366	0	22.321	14.3285	0	5.30213	16.6692	25.964	33.3976	14.2102	8.83224
ILF2	46.6801	110.942	0	66.5301	40.3272	64.4674	39.009	71.9625	24.4713	44.9697	56.5911	44.2662	43.4056	37.4825	32.765	38.052	49.4048	16.7389	55.0398	33.8176	33.2758	40.8586	42.7128	26.8379	32.6424	26.3117	6.49101	10.3486	11.2024	27.7742	46.2925	47.0921	48.9603	16.3305	44.4243	48.9019	39.4763	41.3452	66.1	40.8203	66.963	28.657	0	21.2085	98.8031	64.9101	73.5375	34.1045	45.3233
NPR1	2.71897	1.7194	0	1.38604	0	1.49924	3.46746	5.53558	0	11.2424	1.96839	169.266	0	3.94553	40.9562	2.17323	11.4395	0	38.383	2.62958	98.2676	0.506351	0	1.89838	0	0.877058	123.329	1.82623	0	105.073	0.150987	0.277913	0.598486	0	0.328461	3.41088	0.410499	0.670917	3.85837	0	66.963	0	0	0	0.303077	6.49101	1.09757	8.52612	9.52952
INTS3	33.8336	21.1241	19.8323	19.4046	37.2251	22.4886	27.7397	16.6067	48.9425	30.7293	35.4309	54.3716	23.6758	18.7413	16.3825	45.9658	44.9208	27.5383	29.6925	44.1525	52.2014	32.9518	33.2211	40.2754	27.4883	35.0823	45.437	39.5683	53.9752	54.5445	45.0458	29.934	34.0297	22.8627	36.5413	71.5044	55.8279	32.7911	26.704	0	11.1605	28.657	117.362	26.5106	29.0954	6.49101	19.9131	22.7363	42.0693
SLC27A3	4.91567	6.79574	0	1.38604	9.30628	10.4947	13.003	7.38077	0	15.7394	3.44468	51.4059	7.89192	5.91829	24.5737	4.04575	4.26042	6.47959	38.383	4.58648	27.5565	3.85606	8.30527	14.1076	8.5901	5.26235	19.473	14.0011	37.6808	47.8519	5.02569	6.76255	8.85129	7.62091	8.45787	19.9214	14.2991	7.51986	8.93518	0	100.445	28.657	0	0	8.18308	12.982	3.60631	28.4204	21.8482
GATAD2B	100.149	174.97	99.1615	130.981	164.411	113.942	126.562	110.712	146.828	120.669	146.153	118.08	134.163	142.039	131.06	160.395	183.307	184.668	118.77	121.45	181.873	222.911	201.699	145.989	372.81	176.289	103.856	192.363	177.202	204.793	228.365	274.256	283.976	232.329	231.483	209.108	210.791	292.072	150.883	81.6407	133.926	171.942	117.362	137.855	106.38	84.3831	87.1787	133.576	105.754
DENND4B	16.0015	17.5215	0	17.3255	34.123	35.9818	91.8878	20.2971	0	16.6763	15.7471	18.3436	3.94596	24.6596	16.3825	15.7593	15.9694	56.5164	18.1052	12.4141	23.501	40.1186	43.8993	24.3067	44.6685	28.0658	12.982	122.966	23.4232	42.1632	13.757	12.3087	18.3851	39.8465	19.215	29.5911	27.1614	14.3688	14.5197	40.8203	11.1605	0	0	79.5319	16.6692	38.946	17.718	14.2102	15.8051
CRTC2	13.4441	25.2998	19.8323	12.4744	12.4084	13.4932	13.8699	11.0712	48.9425	15.1773	11.8103	11.8629	47.3515	29.5915	16.3825	10.0324	9.4727	12.4192	13.7599	6.78798	11.4386	11.6071	9.49173	12.0975	22.3343	14.0329	6.49101	20.6973	10.184	10.7081	7.08343	6.30339	7.85381	8.49187	7.88306	12.4366	11.5624	6.09416	14.2151	40.8203	22.321	0	0	31.8128	13.0323	6.49101	9.25098	14.2102	13.7132
SLC39A1	35.5135	17.3578	59.4969	15.9395	21.7146	76.4613	50.2782	36.9038	24.4713	34.8515	18.2076	46.1335	0	11.8366	49.1475	10.9755	13.0852	19.2588	31.1409	19.0186	22.6691	10.5944	9.49173	23.3017	8.5901	15.787	32.455	26.7847	18.3312	10.7081	23.2908	8.63141	11.5392	18.7257	16.9157	14.278	10.4677	8.47032	41.9344	40.8203	78.1235	28.657	0	10.6043	35.46	19.473	16.934	28.4204	56.4798
CREB3L4	3.03663	5.48572	19.8323	2.77209	3.10209	2.99848	1.73373	5.53558	48.9425	3.5601	2.95258	2.19683	0	0	0	3.30768	7.35109	3.2398	5.79366	4.28071	4.67941	3.62236	7.1188	6.73739	1.71802	3.50823	12.982	6.69617	5.092	1.67314	3.06287	4.38216	6.37335	1.95966	1.23173	3.78297	3.76291	7.15644	2.5384	40.8203	0	0	0	0	3.33385	0	5.01748	0	8.36738
JTB	38.5985	56.0034	19.8323	51.9766	49.6335	70.4644	34.6746	77.4981	48.9425	36.3505	52.1622	35.2592	55.2434	33.537	24.5737	14.4062	20.5051	22.6786	43.4525	24.4001	18.1977	37.8595	24.9158	39.4565	27.4883	31.5741	58.4191	31.0459	14.2576	15.7275	19.5894	17.3595	25.6719	20.4676	22.2532	24.8922	28.5297	22.8391	38.6853	0	11.1605	14.3285	0	15.9064	53.9477	45.437	40.4534	11.3682	65.7769
RAB13	7.06393	3.35693	0	10.3953	6.20418	20.9894	3.46746	11.0712	0	7.12021	1.96839	9.66607	7.89192	0	8.19124	17.3175	10.5278	1.79989	13.0357	12.2918	17.4698	4.01186	4.74587	13.3631	1.71802	13.1559	32.455	1.82623	7.1288	8.36572	2.55814	1.30095	0.671984	0.870961	0.985382	0.515209	0.684165	0.559097	22.0333	0	22.321	0	0	0	10.3046	19.473	10.1918	8.52612	7.6701
RPS27	95.643	124.534	99.1615	131.674	223.351	112.443	95.3553	182.674	97.885	105.304	127.453	94.0245	197.298	653.972	147.442	160.6	173.399	205.907	230.298	235.989	138.407	58.4641	93.7309	95.5145	70.4388	57.0087	123.329	37.1333	43.7912	22.4201	47.8455	60.4159	39.8886	72.7253	31.8607	33.2119	38.3133	37.5434	137.581	285.742	133.926	114.628	0	106.043	272.466	201.221	536.87	88.1032	120.165
NUP210L	3.42428	2.62004	0	0.693022	3.10209	1.49924	3.46746	3.69038	0	2.06111	1.47629	2.30668	0	3.94553	0	5.98662	6.20428	4.6797	2.89683	8.37796	9.04686	3.77816	4.74587	3.42453	3.43604	6.1394	0	6.08743	3.0552	7.0272	4.06801	7.01227	9.28178	1.74192	5.91229	17.0305	16.2831	9.4767	3.35069	0	0	0	0	0	1.21231	6.49101	1.88156	0	2.5567
TPM3	57.1306	48.5527	39.6646	52.6697	170.615	209.894	158.636	35.0586	73.4138	61.4586	36.4151	118.3	51.2975	182.481	196.59	43.3278	47.18	160.01	79.6628	57.9731	127.696	48.376	92.5444	51.4796	85.901	146.469	84.3831	124.792	48.8832	97.0423	40.8915	60.8186	53.0447	106.693	28.0834	123.583	109.261	57.1118	136.363	0	133.926	143.285	0	111.345	47.5831	51.928	126.064	65.3669	45.0909
C1orf189	0.613786	0.655011	0	0	0	1.49924	1.73373	1.84519	0	0.749495	0.492097	0.439367	0	0	0	1.16179	0.84291	0.899943	0	2.01805	1.35183	0.545301	1.18647	0.967801	0	0	0	0.608743	2.0368	1.67314	0.737677	0.825683	0.724483	0.21774	0.985382	1.42637	1.36833	0.810691	0.304608	0	0	0	0	0	0.303077	0	0.940778	0	0
C1orf43	96.596	80.0751	39.6646	51.9766	83.7565	92.953	72.8167	62.7365	48.9425	62.0207	91.0379	67.0034	23.6758	38.4689	24.5737	37.4916	45.0068	50.9368	55.0398	44.5194	40.7629	57.763	52.2045	93.6534	39.5145	51.7464	51.928	56.6131	56.012	51.5328	50.4856	49.5209	55.7117	53.7818	50.6651	60.0648	67.8692	46.0976	63.7647	40.8203	66.963	14.3285	0	53.0213	63.9492	90.8741	126.535	42.6306	52.761
UBAP2L	56.2907	62.226	99.1615	33.265	46.5314	65.9666	43.3433	57.2009	48.9425	52.4647	47.2413	40.8611	35.5136	48.3327	24.5737	56.4629	63.1552	56.3364	78.9386	54.1816	54.3852	65.2414	42.7128	56.2814	44.6685	41.2217	32.455	48.0907	47.8648	45.1749	54.5234	56.2149	58.1476	37.8868	49.187	80.1389	59.7961	54.2324	64.1708	40.8203	89.284	28.657	0	68.9277	63.9492	58.4191	52.5268	71.051	58.5717
HAX1	17.5037	26.5279	39.6646	14.5535	9.30628	32.9833	13.8699	25.8327	48.9425	14.8025	21.6522	14.9385	7.89192	15.7821	0	7.47644	7.44857	7.37953	5.79366	6.97144	6.86314	9.46487	8.30527	15.7082	8.5901	5.26235	19.473	6.69617	2.0368	7.0272	10.4957	11.7287	11.8752	8.49187	12.3994	14.4831	18.1304	11.4894	21.4241	40.8203	11.1605	0	0	10.6043	17.2754	19.473	34.1816	8.52612	14.6429
AQP10	0.0376886	0.0818764	0	0.693022	0	19.4901	0	0	0	0	0.492097	0	0	0	16.3825	0.0273362	0	0	0	0.305765	0	0.19475	0	0.111669	0	7.01646	0	0	0	1.00389	0	0	0	0	0	0	0	0	0	0	0	0	0	0	0	0	0	0	0
ATP8B2	7.84462	27.4286	0	8.31626	12.4084	68.9651	1.73373	12.9163	24.4713	28.6682	35.4309	12.9613	0	31.5642	0	24.4249	15.2584	3.41978	32.5893	7.21606	29.7403	4.71296	36.7805	16.8993	29.2063	63.1481	32.455	4.2612	20.368	17.4007	20.1675	27.7792	40.4555	4.57255	20.2825	83.4687	63.2853	23.8175	24.0641	0	11.1605	28.657	0	0	14.5477	6.49101	11.4461	34.1045	61.3608
IL6R	12.4319	1.55565	0	2.77209	15.5105	2.99848	131.764	0	0	5.99596	2.46048	1.97715	11.8379	36.4961	40.9562	1.72218	3.43471	157.31	12.3115	2.62958	2.28771	3.58341	32.0346	176.103	12.0261	6.1394	38.946	144.881	3.0552	2.00777	8.86075	0.950543	1.71146	444.843	1.47807	9.02093	2.32616	1.4257	5.48295	0	11.1605	57.314	0	159.064	0.303077	0	14.7388	0	6.27554
SHE	2.01365	1.63753	0	0.693022	3.10209	5.99697	23.4054	0	0	8.99394	0.492097	161.467	0	0	0	1.02511	1.06654	2.87982	8.69049	1.71228	139.654	1.0127	2.37293	7.74241	0	2.63117	0	38.3508	25.46	166.98	4.62019	0.394717	0.577486	2.39514	0.492691	1.69351	0.752582	0.726826	54.1188	0	167.408	0	0	10.6043	0.303077	0	2.35194	14.2102	1.62699
TDRD10	0.780693	0.409382	0	0.693022	0	0	19.9379	0	0	4.49697	0	28.0096	0	0	0	0.57406	0.665153	5.03968	7.24208	0.917295	23.813	0.506351	2.37293	9.71524	1.71802	0.877058	6.49101	52.9606	20.368	62.2409	4.08958	0.422911	0.734983	1.95966	0.492691	2.08946	2.32616	0.307503	9.95054	0	0	0	0	5.30213	0	0	0.470389	0	0
UBE2Q1	22.7532	34.0606	39.6646	9.70231	34.123	44.9773	20.8048	35.0586	48.9425	19.4869	27.0653	29.5474	15.7838	35.5098	73.7212	11.1395	14.1976	14.2191	13.7599	17.5509	16.8459	6.34886	5.93233	14.5915	6.87208	22.8035	38.946	10.9574	14.2576	8.70035	13.3645	15.2087	19.2985	9.36283	11.2498	17.8606	21.9617	16.2977	34.4208	40.8203	33.4815	28.657	0	0	19.0939	12.982	25.8714	11.3682	20.9185
CHRNB2	0.409191	10.2345	0	0	0	0	0.866866	1.84519	0	0.749495	6.88935	0.219683	0	0	0	0.328034	0.0802771	0	0	0.244612	0	0.11685	1.18647	0.409454	0	0	0	0	1.0184	1.00389	6.84616	7.46337	12.1377	0.870961	5.91229	24.2912	30.3085	6.82099	2.03072	0	0	0	0	0	0.303077	0	0.313593	2.84204	0.232427
ADAR	67.2688	101.527	59.4969	36.7302	93.0628	82.4583	96.2221	131.009	24.4713	71.7642	92.022	92.9261	59.1894	129.216	16.3825	85.0155	71.6875	78.2951	89.0775	66.4733	82.2537	44.9484	53.391	81.742	72.1568	54.3776	84.3831	118.096	53.9752	63.9141	78.8969	65.8211	78.8951	51.3867	56.5774	102.956	87.8468	69.1603	122.148	40.8203	89.284	128.957	0	74.2298	51.22	116.838	28.3801	79.5771	76.0037
KCNN3	3.09585	8.51514	0	2.77209	3.10209	1.49924	5.2012	14.7615	48.9425	13.8657	175.186	57.6669	0	4.93191	40.9562	8.66557	5.55632	2.51984	18.8294	7.1549	121.353	1.51905	2.37293	3.79676	5.15406	2.63117	6.49101	1.21749	7.1288	24.4279	98.7495	5.26021	114.027	3.04836	4.43422	66.5383	109.877	15.1795	4.7722	0	111.605	14.3285	0	0	211.851	12.982	96.4297	11.3682	10.9241
PMVK	27.8411	29.148	39.6646	9.70231	18.6126	32.9833	23.4054	20.2971	48.9425	17.9879	40.844	13.7302	7.89192	33.537	0	8.85692	17.1105	29.1582	23.1746	28.9254	12.9984	5.37511	16.6105	32.3097	15.4622	21.9264	64.9101	21.9147	5.092	9.3696	18.731	14.963	16.5161	11.5402	14.288	24.835	23.5353	13.3904	12.9966	0	0	14.3285	0	15.9064	23.0339	25.964	31.8296	22.7363	18.3618
PBXIP1	120.491	23.7441	19.8323	40.1953	77.5523	46.4765	50.2782	60.8913	48.9425	56.9616	42.8124	35.5887	3.94596	99.6246	0	15.5406	18.5784	14.0391	26.7957	18.5905	12.4784	13.7883	51.0181	34.3197	37.7964	9.64763	97.3651	23.1322	11.2024	12.0466	38.1263	4.37008	1.84796	11.758	7.80094	2.28505	1.91566	2.82344	26.0948	40.8203	66.963	85.971	117.362	21.2085	110.623	38.946	169.497	36.9465	52.5286
PYGO2	18.2251	20.3053	0	7.62324	9.30628	13.4932	13.8699	35.0586	0	14.8025	11.3182	10.2153	7.89192	29.5915	24.5737	11.2215	14.5015	10.7993	23.8989	14.1875	9.87876	8.06267	9.49173	10.5341	8.5901	7.01646	25.964	9.13114	6.1104	5.01943	7.07048	5.15951	4.61989	2.61288	4.76268	7.78538	7.4574	4.64051	10.9659	0	0	14.3285	0	0	19.7	12.982	23.0491	22.7363	12.0862
SHC1	26.5274	86.4614	0	21.4837	6.20418	50.9742	15.6036	36.9038	0	44.7823	63.9725	62.9393	0	32.5506	32.765	25.3133	13.8019	18.1789	91.2502	10.8852	62.0802	12.2693	11.8647	34.8408	12.0261	23.6806	25.964	21.306	18.3312	88.0073	11.9926	3.55648	2.14195	9.58057	4.18788	3.76866	2.12091	1.50956	102.044	0	345.976	14.3285	0	15.9064	15.76	6.49101	24.617	19.8943	57.8744
CKS1B	5.70714	15.4746	0	15.2465	0	17.9909	1.73373	9.22596	0	4.12222	7.38145	8.01844	3.94596	9.86382	8.19124	2.18689	4.79943	3.59977	2.17262	3.97495	2.49569	5.99831	3.5594	5.76958	1.71802	2.63117	6.49101	3.65246	0	0.669257	3.61505	2.13872	0.82948	1.74192	1.97076	1.26894	0.957831	1.03433	3.85837	0	22.321	0	0	15.9064	12.1231	6.49101	6.58544	8.52612	11.1565
FLAD1	12.728	15.3928	19.8323	13.1674	24.8167	25.4871	10.4024	11.0712	24.4713	8.43182	9.84193	9.11686	3.94596	15.7821	32.765	9.03461	13.693	8.99943	8.69049	11.0075	10.3987	20.2151	9.49173	10.8319	15.4622	8.77058	0	12.1749	11.2024	9.03497	12.0013	13.0377	16.4951	8.49187	14.7807	23.7473	21.0723	11.8249	13.4028	0	11.1605	14.3285	0	0	11.82	6.49101	18.8156	5.68408	9.29709
ZBTB7B	11.2258	2.7838	0	6.93022	9.30628	13.4932	20.8048	5.53558	0	5.62121	2.46048	4.28383	7.89192	11.8366	32.765	0.738077	2.43698	22.8586	6.51787	16.389	1.35183	4.16766	4.74587	10.1619	1.71802	5.26235	19.473	29.2197	1.0184	5.35406	1.43222	0.777351	0.514488	13.9354	0.985382	1.03996	0.273666	0.335458	5.48295	0	0	28.657	0	15.9064	3.63692	0	6.89904	5.68408	6.04311
DCST2	1.60984	0.90064	0	1.38604	0	0	0	5.53558	0	3.18535	0.984193	1.97715	0	0	0	1.80419	2.76956	1.07993	1.44842	2.0792	4.67941	0.779001	0	1.26559	0	1.75412	0	0	1.0184	5.68869	1.71693	0.777351	1.37547	0.21774	0.739037	2.08469	3.96816	2.90731	0.609217	0	0	0	0	5.30213	0.303077	0	0.627185	0	1.39456
DCST1	0.0969136	0.163753	0	0	0	0	0	0	0	0.187374	0	0.109842	0	0	0	0.191353	0.217895	0.539966	0	0.183459	0	0.1558	0	0.260562	0	0	0	0	0	0	0.185498	0.149026	0.188996	0.435481	0	0.343473	0.478916	0.307503	0	0	0	0	0	0	0.303077	0	0.156796	0	0.232427
ADAM15	1.63138	7.20512	0	2.77209	0	13.4932	17.3373	7.38077	0	7.8697	5.90516	49.978	0	7.89106	24.5737	1.74952	4.75929	11.5193	23.8989	4.58648	113.138	2.88231	15.4241	2.23339	6.87208	10.5247	38.946	38.9595	4.0736	30.1166	28.1396	4.5916	7.34983	5.22577	10.3465	11.6017	16.2147	5.47915	44.5744	0	55.8025	0	0	10.6043	10.6077	19.473	5.48787	14.2102	19.5239
EFNA4	12.6741	1.63753	0	4.85115	0	0	7.80179	11.0712	0	6.37071	2.46048	4.61335	0	8.87744	8.19124	7.23042	11.6172	7.55952	6.51787	9.78448	6.3432	0.272651	0	4.28066	1.71802	0	19.473	3.65246	2.0368	2.00777	7.23441	2.02997	0.755982	4.79029	0.246346	0.858682	0.889415	0.475233	5.68602	0	44.642	14.3285	0	0	4.84923	12.982	1.25437	11.3682	10.4592
EFNA3	5.62099	13.1002	0	1.38604	0	1.49924	2.6006	1.84519	0	3.5601	8.85774	2.6362	0	6.90468	0	0.984102	4.07693	2.15986	0	2.62958	1.35183	0.389501	2.37293	2.27061	0	2.63117	0	0.608743	1.0184	0.669257	5.31041	16.3163	29.8718	1.0887	2.87403	53.4864	52.4071	17.4718	6.29524	0	0	0	0	0	1.81846	0	2.50874	0	2.32427
EFNA1	1.74983	1.7194	19.8323	0.693022	6.20418	0	1.73373	5.53558	0	4.12222	0.984193	91.3883	7.89192	0.986382	16.3825	0.451047	5.45885	0.719955	3.62104	11.6802	39.0991	1.90855	3.5594	45.71	1.71802	2.63117	32.455	2.43497	0	24.0933	0.759247	0.273885	1.03948	0.21774	2.87403	0.348243	1.16308	1.92889	56.048	0	89.284	0	0	0	2.12154	0	2.19515	14.2102	2.78913
SLC50A1	28.5841	10.0708	0	9.00928	12.4084	34.4826	15.6036	12.9163	24.4713	14.6152	8.85774	22.7372	3.94596	7.89106	90.1037	5.34422	6.02652	9.17942	10.1389	12.2918	11.1266	3.89501	11.8647	15.4848	12.0261	17.5412	12.982	3.65246	3.0552	3.34629	3.39504	2.19914	2.71944	8.49187	3.03826	4.54624	3.69449	2.06866	9.84901	0	11.1605	0	117.362	5.30213	5.15231	6.49101	6.27185	8.52612	12.0862
DPM3	13.7456	9.08828	0	16.6325	18.6126	22.4886	4.33433	22.1423	48.9425	11.6172	18.2076	11.3137	0	6.90468	0	7.61312	13.6987	6.83957	18.1052	15.1048	9.25484	11.9966	11.8647	19.2071	5.15406	13.1559	19.473	3.65246	5.092	2.00777	8.63212	5.75159	5.86936	6.09673	9.68959	6.25407	8.6889	6.23393	19.0888	0	11.1605	14.3285	0	5.30213	10.3046	19.473	15.366	11.3682	9.99437
KRTCAP2	1.56139	1.55565	0	3.46511	0	1.49924	4.33433	3.69038	0	1.31162	1.47629	1.97715	0	0.986382	0	1.07978	1.38191	2.51984	0.724208	1.34537	2.07974	3.46656	0	3.23841	3.43604	5.26235	0	0.608743	3.0552	2.00777	1.22946	1.13985	1.19697	1.95966	0.903267	1.87002	2.463	0.754781	1.31997	0	11.1605	14.3285	0	0	0.909231	0	1.56796	0	2.09185
RP11-201K10.3	0.11845	1.06439	0	0	0	0	0	0	0	0	0.984193	0.109842	0	0	8.19124	0.0683404	0.217895	0	0	1.0396	0	0.1558	1.18647	0.521124	0	0	0	0	2.0368	0	0.422762	1.70373	1.53296	1.0887	0.16423	3.6494	2.463	1.28592	0.406145	0	0	0	0	0	0	0	0	0	0
TRIM46	0.850686	18.2584	0	1.38604	3.10209	8.99545	0	1.84519	0	0.562121	14.2708	0.549208	0	1.97276	0	1.61283	4.33497	0.359977	2.89683	1.83459	2.07974	1.12955	4.74587	2.30783	1.71802	1.75412	12.982	1.21749	0	1.33851	7.20853	30.365	27.7613	1.95966	13.6311	68.5515	47.96	23.9853	3.85837	0	0	0	0	10.6043	0.303077	0	1.72476	2.84204	1.16214
MUC1	1.88443	1.3919	0	19.4046	0	1.49924	0	0	0	5.99596	2.46048	1.3181	0	0	0	0.533055	7.33962	0.719955	5.06945	63.3545	0.623922	24.0322	1.18647	3.16397	1.71802	2.63117	6.49101	1.21749	1.0184	0.669257	1.62203	0.531659	0.398991	0.435481	0.328461	1.89864	1.43675	0.0838646	0.406145	0	0	0	0	0	1.21231	0	2.97913	0	3.95126
THBS3	10.2998	6.46823	0	4.15813	6.20418	4.49773	6.06806	9.22596	0	27.3566	33.4626	7.57908	0	7.89106	16.3825	8.11884	11.8409	4.6797	35.4862	9.96794	4.88739	4.71296	13.0511	13.8842	15.4622	13.1559	25.964	4.86994	13.2392	9.70423	8.88664	8.15211	3.87441	2.61288	2.46346	12.885	9.37307	4.27709	4.7722	0	55.8025	0	0	5.30213	40.9154	25.964	21.0107	14.2102	139.456
MTX1	0.11845	0.245629	0	0.693022	0	0	0	0	0	0.749495	0.984193	0.109842	0	0	0	0.396375	0.206427	0	0	0.183459	0	0.1558	0	0.0744462	0	0	0	0	0	0	0.267462	0.136943	0.115497	0	0.0821152	0.228982	0.0684165	0.111819	0.101536	0	0	0	0	0	0	0	0	0	0
GBA	2.39054	1.22815	0	0.693022	0	5.99697	0.866866	1.84519	0	0.374748	3.93677	0.549208	7.89192	2.95915	0	1.74952	1.73169	5.03968	0.724208	1.46767	1.14386	2.92126	3.5594	2.64284	1.71802	5.26235	0	4.86994	0	1.67314	2.17421	1.71984	2.26795	3.91932	3.12038	2.97676	3.69449	0.866601	1.52304	0	11.1605	0	0	0	0.909231	0	0.783981	0	1.62699
FAM189B	25.3914	29.803	0	10.3953	9.30628	29.9848	8.66866	22.1423	73.4138	21.1732	27.0653	16.5861	0	2.95915	8.19124	10.3741	13.5668	5.03968	15.2084	12.2918	11.3346	5.53091	13.0511	13.6237	5.15406	17.5412	45.437	10.3486	12.2208	8.70035	13.2868	14.7213	16.6106	6.96769	15.3555	23.4706	31.0611	10.3433	19.4949	0	0	14.3285	0	0	16.9723	6.49101	17.0908	19.8943	20.9185
SCAMP3	44.2195	37.6631	19.8323	27.7209	27.9188	52.4735	34.6746	35.0586	97.885	31.4788	28.0495	43.0579	0	13.8094	40.9562	13.299	17.0532	12.4192	23.1746	17.4898	20.7974	24.3827	26.1023	30.188	15.4622	28.9429	45.437	26.7847	16.2944	19.7431	36.6768	34.6304	48.2569	21.9918	40.3186	53.1047	59.9329	31.6169	34.8269	122.461	44.642	0	0	26.5106	26.0646	25.964	39.983	19.8943	30.448
CLK2	34.9804	17.1122	0	24.9488	12.4084	32.9833	19.9379	12.9163	48.9425	25.8576	24.1127	20.4306	0	14.7957	16.3825	19.4634	18.9397	15.659	28.9683	16.6336	14.3502	45.9221	41.5263	30.3368	39.5145	39.4676	25.964	12.7836	31.5704	28.1088	17.4282	17.0856	16.3691	17.8547	17.7369	23.5899	22.3038	16.13	19.2919	40.8203	22.321	28.657	0	37.1149	29.0954	38.946	20.8539	28.4204	23.94
HCN3	3.94115	16.7028	0	5.54417	0	1.49924	2.6006	1.84519	0	4.12222	7.87354	1.42794	0	0	0	3.62204	2.62621	0	2.89683	2.56843	1.35183	4.40136	2.37293	10.5714	1.71802	0.877058	6.49101	4.2612	1.0184	1.33851	7.36383	14.4676	12.7572	1.52418	9.93594	42.0039	65.9535	10.7067	3.04608	0	0	0	0	0	0.606154	0	2.35194	0	6.04311
PKLR	0.215364	0.409382	0	21.4837	0	0	0	1.84519	0	0	0	0.219683	7.89192	0	0	0.382706	0.275236	0.179989	0.724208	0.244612	0.311961	23.1363	1.18647	10.348	0	0	0	0.608743	2.0368	1.00389	0.241578	0.35444	0.304493	0.435481	0.328461	0.925468	0.957831	0.251594	0	0	0	0	0	0	0	0	0.156796	0	0.232427
FDPS	403.591	57.3953	79.3292	118.507	65.1439	104.947	72.8167	71.9625	244.713	81.3202	67.9093	129.723	31.5677	50.3055	81.9124	31.669	48.0917	31.498	70.2481	54.3039	90.8846	123.433	55.7639	369.923	73.8749	90.3369	58.4191	51.1344	34.6256	80.3109	79.7381	46.6491	34.1872	29.6127	72.7541	41.7749	64.1747	26.4453	83.6658	0	122.766	0	0	21.2085	33.3385	32.455	39.0423	42.6306	38.8154
RUSC1	15.0162	51.009	19.8323	12.4744	15.5105	8.99545	4.33433	12.9163	0	15.9268	18.2076	15.4877	3.94596	4.93191	0	11.9596	7.19054	6.11961	34.0378	9.35641	14.1422	11.4903	7.1188	12.7675	0	9.64763	6.49101	8.5224	11.2024	10.0389	19.4557	42.6093	37.9566	8.70961	18.558	59.0678	75.2582	28.514	24.7748	0	44.642	0	0	5.30213	14.5477	19.473	14.4253	34.1045	28.821
ASH1L	354.898	237.769	356.982	297.306	266.78	334.331	387.489	225.113	318.126	343.456	348.896	283.721	288.055	247.582	516.048	343.971	290.643	264.223	370.794	276.228	291.579	574.553	423.569	358.124	544.612	438.529	318.059	452.905	464.39	445.391	429.643	418.738	458.881	532.157	448.677	436.067	471.732	469.977	227.746	122.461	212.05	300.899	0	323.43	317.019	259.64	232.058	250.099	273.567
MSTO1	6.60089	8.59702	19.8323	6.2372	9.30628	4.49773	6.93493	5.53558	0	8.24445	6.88935	6.70034	0	6.90468	16.3825	11.3172	11.0553	8.45947	10.1389	10.8852	10.5027	9.23117	8.30527	7.8913	13.7442	6.1394	6.49101	7.91366	4.0736	5.35406	10.4008	12.204	13.3662	6.09673	10.2644	21.2953	21.688	10.9304	5.48295	0	0	14.3285	0	0	7.27385	6.49101	6.89904	11.3682	6.04311
YY1AP1	66.5204	54.8572	99.1615	72.0743	55.8377	73.4629	59.8138	71.9625	73.4138	55.2753	72.3382	48.3303	59.1894	57.2102	73.7212	78.1541	62.8398	64.2559	62.2819	49.5339	47.938	123.043	84.2391	75.7491	73.8749	75.4269	58.4191	82.1803	71.288	72.2798	60.9856	71.1135	80.7641	65.3221	78.0094	104.845	100.504	64.9391	38.9899	81.6407	55.8025	42.9855	0	95.4383	49.7046	51.928	50.9588	36.9465	48.5773
DAP3	105.927	35.78	59.4969	77.6184	37.2251	76.4613	96.2221	36.9038	97.885	53.5889	55.6069	59.2047	102.595	58.1966	32.765	48.9454	49.9668	58.6763	49.9703	46.8432	63.1201	165.694	78.3068	71.6545	99.6452	70.1646	136.311	116.879	75.3616	85.9996	51.0119	60.0534	69.9598	93.4106	67.1702	106.395	110.63	51.1854	47.722	0	55.8025	42.9855	0	68.9277	44.8554	19.473	85.9244	51.1567	40.2099
GON4L	55.16	26.6917	59.4969	60.9859	43.4293	74.9621	59.8138	23.9875	73.4138	56.9616	44.2887	54.0421	118.379	46.36	65.5299	81.6258	69.1588	50.3968	63.7303	62.9265	83.0856	112.566	84.2391	67.225	108.235	121.911	58.4191	107.139	93.6928	126.49	68.8671	62.6029	68.6684	59.8786	61.0116	88.0626	89.2152	56.1054	55.5403	40.8203	89.284	14.3285	234.724	42.417	45.4615	45.437	36.6903	51.1567	51.134
SYT11	6.81087	399.802	0	2.77209	12.4084	23.9879	14.7367	300.766	24.4713	19.1121	187.489	7.79876	0	5.91829	32.765	11.8639	17.013	7.73951	22.4504	10.9464	15.0781	2.80441	8.30527	5.91848	10.3081	12.2788	0	7.30491	5.092	6.69257	469.814	257.077	274.023	28.7417	414.928	178.596	240.416	237.672	106.105	0	44.642	0	0	0	23.0339	155.784	14.1117	19.8943	55.3177
RIT1	13.4333	7.86013	19.8323	8.31626	9.30628	28.4856	11.2693	29.5231	48.9425	13.1162	7.87354	14.2794	11.8379	8.87744	8.19124	9.06194	8.42336	10.9793	12.3115	12.4141	10.8146	7.82896	4.74587	7.55629	5.15406	27.1888	6.49101	9.73988	11.2024	11.0427	13.1919	7.46337	7.97981	7.83865	9.36113	10.9243	9.98881	6.96076	20.8149	0	11.1605	0	234.724	5.30213	9.69846	19.473	10.035	8.52612	10.2268
KIAA0907	61.0717	27.5923	138.826	32.572	21.7146	35.9818	34.6746	25.8327	171.299	35.601	30.0179	30.2065	27.6217	32.5506	49.1475	48.2073	49.5023	25.5584	24.6231	51.6131	38.6831	119.577	64.0692	50.8096	56.6947	64.9023	19.473	42.0032	58.0488	48.1865	36.6984	33.6275	38.3136	34.8384	34.3242	59.3874	48.3705	28.1505	25.2825	0	33.4815	0	0	31.8128	34.2477	32.455	27.4393	31.2624	26.9616
ARHGEF2	3.02047	12.1996	59.4969	51.2836	55.8377	62.9682	106.625	36.9038	0	50.7783	4.42887	46.463	39.4596	63.1285	81.9124	48.5764	36.8357	66.4158	49.9703	26.2958	72.0629	59.6715	128.138	44.8539	104.799	74.5499	97.3651	162.534	59.0672	94.3653	37.2419	76.7483	66.1379	62.4915	64.871	77.1001	55.4174	94.4036	61.734	0	11.1605	28.657	0	106.043	148.508	12.982	104.426	85.2612	45.5558
SSR2	119.554	104.229	19.8323	83.1626	102.369	166.416	101.423	232.494	97.885	119.544	82.1801	127.087	19.7298	95.6791	90.1037	110.821	78.7232	46.6171	169.465	74.0563	73.6227	37.8595	37.9669	92.0528	32.6424	36.8364	129.82	48.6994	64.1592	32.7936	71.7445	77.6666	76.2807	47.6851	71.6866	72.6636	83.3313	62.0318	126.514	81.6407	78.1235	71.6425	117.362	47.7192	135.778	116.838	110.385	105.155	200.352
UBQLN4	3.26814	2.37441	0	2.77209	3.10209	1.49924	0.866866	3.69038	0	1.68636	3.93677	2.30668	0	0	16.3825	4.52414	4.66754	0.899943	6.51787	5.25916	2.70366	5.37511	1.18647	4.57844	3.43604	3.50823	0	4.2612	3.0552	4.01554	4.81863	5.12729	6.33135	3.04836	7.30825	8.49141	10.7414	4.86415	2.2338	40.8203	11.1605	14.3285	0	0	4.54615	0	3.29272	2.84204	2.09185
LAMTOR2	15.3447	11.9539	0	13.8604	9.30628	26.9864	21.6716	27.6779	24.4713	12.7414	8.85774	14.8286	11.8379	22.6868	32.765	8.10518	10.4876	26.2783	9.4147	15.1659	11.7505	7.79001	3.5594	21.6639	3.43604	9.64763	0	17.0448	9.1656	4.6848	7.24304	8.15614	8.5888	10.4515	5.33749	11.7735	16.0779	7.7435	19.3934	0	11.1605	42.9855	0	10.6043	12.4262	6.49101	22.8923	17.0522	9.76195
RAB25	0.150755	0.491258	0	0	3.10209	0	0	0	0	0.187374	0	0.109842	0	10.8502	0	0.683404	3.0448	0.179989	0.724208	55.16	0.519935	0.389501	0	2.27061	0	0	0	0	0	0.669257	0.271776	0.439022	0.692984	0	0.246346	1.08766	0.752582	0.503188	0.203072	0	0	0	0	5.30213	0.606154	0	1.09757	0	0.464855
MEX3A	8.09767	152.781	0	9.00928	3.10209	14.9924	4.33433	64.5817	0	20.7985	10.8261	8.78734	7.89192	0.986382	49.1475	102.77	145.955	1.25992	118.046	53.3254	45.4423	4.40136	5.93233	13.9214	0	13.1559	12.982	5.47868	12.2208	5.01943	124.452	199.69	210.048	17.2015	66.5133	162.515	124.86	229.565	57.571	0	0	0	0	5.30213	79.4062	19.473	99.7224	53.9987	61.8257
[truncated: 18,758 more rows]
[truncated: 123 more columns]
