# Supplementary material for: Cell type–specific analysis by single-cell profiling identifies a stable mammalian tRNA–mRNA interface and increased translation efficiency in neurons
Source: HighWire-hosted journal article supplement (doi:10.1101/gr.275944.121), 2021-12-02
Supplement: Supplemental_Table_S10.xlsx [file Supplemental_Table_S10.xlsx]

## Sheet: codon_usage
# Table S10. Fetal human codon usage by cell type matrix
	Adrenal Adrenocortical cells	Adrenal Chromaffin cells	Adrenal CSH1_CSH2 positive cells	Adrenal Erythroblasts	Adrenal Lymphoid cells	Adrenal Megakaryocytes	Adrenal Myeloid cells	Adrenal Schwann cells	Adrenal SLC26A4_PAEP positive cells	Adrenal Stromal cells	Adrenal Sympathoblasts	Adrenal Vascular endothelial cells	Kidney Erythroblasts	Kidney Lymphoid cells	Kidney Megakaryocytes	Kidney Mesangial cells	Kidney Metanephric cells	Kidney Myeloid cells	Kidney Stromal cells	Kidney Ureteric bud cells	Kidney Vascular endothelial cells	Liver Erythroblasts	Liver Hematopoietic stem cells	Liver Hepatoblasts	Liver Lymphoid cells	Liver Megakaryocytes	Liver Mesothelial cells	Liver Myeloid cells	Liver Stellate cells	Liver Vascular endothelial cells	Cerebellum Astrocytes	Cerebellum Granule neurons	Cerebellum Inhibitory interneurons	Cerebellum Microglia	Cerebellum Oligodendrocytes	Cerebellum Purkinje neurons	Cerebellum SLC24A4_PEX5L positive cells	Cerebellum Unipolar brush cells	Cerebellum Vascular endothelial cells	Muscle Erythroblasts	Muscle Lymphatic endothelial cells	Muscle Lymphoid cells	Muscle Megakaryocytes	Muscle Myeloid cells	Muscle Satellite cells	Muscle Schwann cells	Muscle Skeletal muscle cells	Muscle Smooth muscle cells	Muscle Stromal cells
AAA	177665	177810	176532	176890	183395	173313	175530	175550	187386	177791	176074	173156	172512	187679	176578	174613	177315	176830	173633	178232	172790	186220	190392	194853	190282	179938	173973	178868	178365	175158	173551	173772	171045	178880	169466	171169	171313	180432	176567	185992	178874	191606	174225	185909	190768	185327	302663	178997	174479
AAC	107250	109956	110989	108745	105803	107653	109574	109437	106017	112196	109324	109216	112815	106647	108306	109875	108570	109912	113580	108680	110219	103349	105217	107023	106593	106805	108383	109036	108608	110144	112521	112475	113613	109144	114324	111272	110779	112285	110093	106519	108261	105426	109881	108485	104649	107838	86130.7	109545	114788
AAG	184152	185201	181909	203560	190674	191754	186845	184148	183067	183800	179901	183842	217794	198109	188345	183218	182025	190517	192292	186692	187423	184148	186692	190824	186357	184319	184403	186692	176810	180486	171475	167616	169184	181222	159005	171767	169500	169521	189000	207754	188939	190584	195517	186692	192183	184358	215245	187245	186966
AAT	119537	118344	122493	119563	120602	117947	119380	118752	123392	121709	119595	116329	116901	119951	119147	119296	120220	118233	114954	119443	114847	125193	125713	118197	125066	123422	116647	119878	123047	119748	126172	126083	123411	123879	133907	120807	122704	130964	114669	115628	115643	124255	117186	123685	118092	120601	118197	116030	117987
ACA	98702.1	99988.3	99122.2	99076.3	98968.6	95502.4	97583.5	97887.4	103416	98878.9	100713	97800.2	98696.4	98816.3	97704.6	98845.7	99467.2	97011.2	93205.7	98534.5	97200.4	101495	101596	99685.1	101658	100108	99778.6	99558.2	100371	99680.7	104118	105718	104690	101738	107976	101517	104519	105938	99477.7	99844.5	99686.6	101363	96204.3	101324	102522	101537	145314	97535.3	94529.2
ACC	95314.8	98285.4	95442.8	105369	93209	96440.6	95368.6	97931.3	92480.6	97506	95251	98455	115513	93065.4	94375.3	96809.2	95143.5	94550.2	100566	95746	98622.7	90645.5	89642.5	103449	90896.8	92566.6	98613.9	95827.8	94950.9	97170.7	98712.5	99988.9	102085	93734.9	99376.3	99078.4	99212.8	97684.2	101054	105476	98920	91171.1	101489	92551.6	97017.8	96789	105136	97216.2	100098
ACG	28824.2	30922.6	30102.6	26356.5	28447.9	29989.6	29901.6	30824.7	28865.5	29790	30055.6	30577.2	26103.5	29475.2	30400.7	30906.2	30593	30704.3	29982.6	30973.8	31741.3	27649.9	28429.7	28696.9	28596.2	29394.4	30511.4	30092.7	29561.7	31044.6	32202.1	31789.5	33850.5	30105.5	31781	32789.5	32205.4	30135.6	31614.4	26212.6	31004.8	28417	30928.4	28931.3	28867.9	30066.3	20928.7	30447.3	28877
ACT	87181.5	87622.2	87396.6	88987.5	87483.9	85301.8	85075	87365.4	90510.8	89841.3	87929.6	85375.1	89375.2	87709.6	85802.4	87334.6	87681.7	84743.4	90043.2	86656.5	84471.8	90036.8	90261.5	86926.5	89698.1	87870.5	87307.1	86096.2	88440.9	87118.1	90885.2	91386.1	92252.1	87774.9	91981.6	88092.3	88615	92126	88291.6	92613.4	88031.4	90033.5	85946.7	89074.2	92885.4	92182.6	138365	86251.6	95365.3
AGA	79154.2	77297.4	80421.8	78471.4	81428.4	76693.3	78424	75788.7	83742.7	81796.2	79987.6	77776.6	76518.2	82114.2	78446.7	79776.8	80565.5	78183.4	78478.9	80564.6	77330.1	83823.8	84730.2	81850	84535.4	81419.3	79847.8	79842.2	81820.5	79295.7	78304.6	79877.9	76234.1	80623.6	79867.3	77788.7	78669.2	82510.9	77486.9	79680.9	78335.3	83950.8	75844.5	81770.1	81789.7	79903.2	108834	79410.9	82466.5
AGC	106569	110590	107977	102758	104260	102191	108029	105329	106774	109784	109842	111812	106864	106102	106933	112820	111618	110351	110292	110266	114728	100810	105707	100891	107951	103604	108985	108768	109878	112610	111742	112272	113296	109989	107331	110604	110671	109135	110923	101166	108786	103522	104752	106811	103122	104381	82611.7	109943	107951
AGG	64027.6	64038.6	64814.6	63173.3	63996.8	61941	64145	61296.4	65281.9	63266.6	65089.3	64696.8	64664.5	64798.4	63787.4	64203.1	65183.1	64843.8	59863.3	65130.8	65654.5	63413.7	65220.1	62808.9	65852	64319.3	63555	64989.1	64334	66228	64451.8	63444	63460.6	64468.8	63189.4	64507.3	63720.5	63524	64222.4	62089.9	64082.2	63729.2	61701.3	64119.2	61925	61719.5	52329.8	63957.8	58227.2
AGT	85560.4	86448.8	87396.6	87774.7	86852.7	82523.1	86082.7	82350.9	89854.2	86524.3	88043.2	85735.4	88527.8	88096.7	87196.5	87525.1	89160.6	86998.8	81991.1	88087.2	86596.4	92045.9	92513	80739.7	92593.7	88117.4	84441.2	88066.7	88379.4	89364.7	89250.8	90760.6	87453.8	91353.3	89511.5	85897.4	88466.2	90201.3	83281.6	85312.8	84823	89615.6	81128.7	89836.7	85810.7	84509.6	91118.5	84300.6	82626.1
ATA	51113.4	49410.2	51875.9	50674.3	51057.4	49494.4	50393.3	49116	53488.2	49588.2	50501	48738.2	49104.7	49681.8	49679.4	49103.4	50184.5	48973.1	44218	50032.1	47408.6	54057.8	54238.2	47567.5	53125.3	53685.3	49127	51430.6	51334.6	50376.7	52317.5	52447.7	52625.1	53041.9	57004.2	52012.6	53217.3	55915.1	48004.8	49713.6	48764.4	53003.2	47402.8	52404.1	49784	50549.8	65794.6	48802.6	45111.7
ATC	105594	106142	102680	101060	101715	106685	105568	106622	101496	103135	103729	104895	100099	101756	102553	101353	100190	103307	105300	102099	104686	96163.9	96117	101285	96061.5	100948	102435	104142	98027.2	102354	106250	105073	108417	102918	107363	108009	108122	103163	109415	101096	105692	99366.5	109415	101153	102569	104724	112511	104324	103628
ATG	127424	126523	125950	130855	129562	128392	129565	124165	126700	124157	125775	126586	131774	130015	127689	125004	125605	129552	121410	126739	126358	127752	129359	123511	129558	128188	124892	128450	123832	124358	123074	124157	123565	129324	118283	124240	122718	123192	122738	124180	123721	129548	126822	129592	121738	120668	89564.4	122537	116342
ATT	106353	104688	104884	102817	106139	104600	103638	104531	109956	105836	104946	101443	96602.3	104596	102907	102996	104159	101122	101947	104175	98904.9	108286	108003	101971	106502	107706	103613	104477	105263	102341	109087	109983	108162	107225	113034	108212	109516	111798	103846	102973	103690	108862	103354	107096	108496	108739	159244	103145	105770
CAA	86742.7	86880.4	88488.3	86143.1	89111.2	85965.7	87123.1	87795.7	92404.8	91216.4	88945.9	87180.7	83701.6	88812.5	88247.3	89370.5	89057.2	87078.5	89213.6	87940	87333.6	92993.9	93893.3	92215	93732.1	92549	86207.8	89297.6	90923.7	90897.5	90165.6	89450	86252.5	91034.6	89566.6	89566.9	89949	91506.9	84356.8	86772.9	88230.2	92726.6	87034.6	91048.1	89311	90071	86676.3	87011.4	93381.8
CAC	77815.5	76931.1	76702	87251.7	75673.8	74912.4	77692.8	75183	76343.2	76260.3	76226.7	78582.3	96680.2	76169	76574	77736.9	78029.2	78372	75401	77751.4	80305.3	75385.2	76499.9	76367	76868.2	75186.3	78179.2	78777.2	76413.8	80025.7	77356.9	75682.1	76482.1	77071.5	74313.3	78125	76527.2	75854.3	77022.2	83365.9	76986.7	74571.3	74601.1	75670.3	73397.2	73259.2	50484.9	74676.2	72947.2
CAG	197540	198229	200327	196854	202937	204296	202749	198496	199104	198393	197043	201032	200485	207393	206791	201603	203011	205766	197218	203776	209206	199939	204036	191464	206060	205551	197607	203826	197752	205169	191018	185564	184799	201798	179267	192768	186476	185535	199935	190720	202922	204235	206396	200759	193526	192737	122452	198927	188948
CAT	70140.9	68644	71304.1	75207.2	71950.7	69114.4	70853.4	66996	72378.3	68067.3	69637.9	69358.3	77511.7	71974.4	70768.5	69136.5	71320.1	70094	62444.7	71661.3	69194.3	75579.2	76144.9	73988.6	75681.2	73756.1	69437.4	72561.6	71745.8	72150.1	70577.1	70975	69965.2	73397.8	70579.2	67772.1	68501.5	73622.1	67279.3	70433.4	68440.5	74107	66830.2	72335.4	67741.1	66803.4	53000.4	66665.6	61467.5
CCA	110150	109292	113860	106529	110463	106568	109116	108282	115714	121946	111711	110652	106128	112689	111396	116120	114310	111157	126969	111906	112722	112345	113752	104594	115060	111591	114481	109416	116650	111916	111394	113951	109178	111114	111157	106756	108840	112043	114983	113055	113869	112136	109570	114571	121612	117441	178816	121689	142561
CCC	98127.8	100282	98374.2	91143.1	96079	97500	99635.7	103125	95839.4	118329	98194	103371	92701.4	98963.6	99587.8	107092	102156	102346	150871	100910	106539	89230.1	93963.7	96776.3	95946.7	93568	104071	97978	100511	100376	97275.2	95709.1	96191.9	95754.3	90100.6	95825.4	94426.9	92926.9	105067	97271.9	103335	93724.9	103354	97247.6	101737	104435	76389.7	109858	169266
CCG	34445.4	35399.3	34307.7	32331	33581.3	34022.5	34312	34757.4	34194.1	34082.4	34091.8	35618.3	33335.5	34860	35082.5	36154.6	36642.7	36162.1	34462.5	35867.9	37033	31519.5	33361.1	31543.7	33799.8	33353.6	34371.9	33567.8	34366	34271.3	33886.2	33012.8	33771.4	33349.6	31626.4	34556.1	32631.4	31806.5	36862.6	31427.4	34837.8	32224.5	34658.4	32772.2	33621	32917.5	21093.2	35476.8	32485.4
CCT	112815	110951	112930	111716	112209	110185	111513	115893	116497	152808	112652	111518	113346	113850	113519	123224	115198	112807	204100	113125	113703	113223	114735	108747	116117	113767	120285	111572	121818	112790	112440	113383	108097	111918	111740	107757	109318	110338	117891	126057	116807	114504	116875	117549	128091	130453	171035	131733	260073
CGA	39245.2	39182.1	39119.2	38394.3	39631.8	39230.2	38505.4	37748.1	40558.1	41063.9	40405.3	38846.7	37874.4	40575.3	40222.1	39315.1	40083.9	39119.2	42938.8	39808.2	40005	40742.1	40759.7	36469.8	40229.3	40182.5	39024.2	38780.1	39144.4	40116.4	39690.2	39873.4	38649.1	39522.4	38627.2	39596.5	38474.3	38901	38631.5	38032.7	38670.8	39839.5	39476.4	39356.5	39226.2	38378	34711.8	39545.9	45402.6
CGC	48157.9	47012.4	45912	42076.3	45692.2	46787.2	45294.7	49487.8	45356.4	48099.3	45510.9	47698.2	40884.1	46995.1	45351.3	46854	45567.1	45917.4	53219.7	46480.3	48282.5	41148.3	41886.2	44895.1	41515.6	41942.2	47347.2	43689.1	43814.1	43606.8	43286.3	42983.9	45429.5	41199	40999.4	44985.3	43861.7	41510.4	49070.2	42413	48111.3	42811.2	47402.8	42655.8	48581.1	47140.3	33435.9	48249.5	51959.9
CGG	54141.3	54035.9	54018.9	52005.8	53996.3	56985.8	54318.4	54184.9	53260.9	52649.9	54197.4	55375.1	52581.9	57070.1	56743.8	54594.2	55631.2	56166.6	53862.2	56188.2	58264.2	52718.7	53628	49689.6	53290.7	54360	55264.6	53874	51565.4	55011.6	51074.2	50553.4	51618.4	51936.2	47530.6	54283.2	51235.2	49444.4	57078.1	50687.1	55507.6	52655	57815.9	52397	52760.9	52015.8	31042.3	54844	50374.6
CGT	28207.6	26843	27353.1	28620.1	28378.9	28383.6	26545.8	28456.3	28057.3	31836.8	26785.7	26995.2	28480.1	29029.8	27508.4	27835.4	27075.9	26896.9	39847.2	27005	26703.5	28213	27592.1	27823.2	27156.2	26987.9	27939.8	26233	26454.2	25390.7	25613.7	26200.5	25826.4	25797.3	24773.6	25581.5	25503.2	25890.4	27919.3	30523.5	27058.2	28300.9	28597.1	26985.9	30221.4	29588.8	36144.2	28891.3	45883.3
CTA	44676.4	43323.9	44193.6	46662.3	45485.1	45127.5	44806.3	42169.6	46240.3	41961.7	43493.6	43505	45963.5	45080.8	44747.9	42142.5	43551.3	44101.7	38161.9	43917.6	42842.5	48585.2	47983.7	45834.3	47088.9	47298.2	42642.6	45438.9	43277.6	44993	44019.8	42529.1	42300.2	46208.1	43708.4	44160.3	43727.8	44250.5	42063	45194.2	42617.4	46734.8	43517.3	45962.3	43488.8	42157.3	43605.9	42508.9	36959.4
CTC	90828.2	90795.6	90388.6	91176.8	89525.4	91922.7	93007.1	91149.8	88313.7	89761.1	91941.5	91798.3	92725.8	89155.9	89849.6	88472.6	88018.7	91548.2	91737.2	89647	91574	87020.8	87894.1	93526	87876.7	90101.6	90683.5	92944.8	86694.2	91305.5	89475.9	87770.1	92395.7	90507	86800.8	92114.2	91072.7	86963.3	92418.8	88789.3	91296.6	87990.4	92163.5	88810.5	86263.8	87912.3	64995.2	90548.7	90910.9
CTG	180140	177392	175743	206055	178405	189115	186157	180194	172006	173488	174731	182980	225620	178163	180906	172668	172725	183602	173818	177577	184567	178118	174158	188628	172980	179609	180451	186467	170170	179841	168955	164876	168627	175742	159727	171133	168851	160980	185504	197533	181642	173543	187591	175975	170729	171891	120744	177311	165416
CTT	86709.2	83336.9	86648.6	88336.3	88746.3	85965.7	87521.4	83457.8	89854.2	85089.1	85473.2	84254.3	84914.2	88019	86915.6	82918.1	85551.9	86298.5	81537.3	85960.2	83133.5	94177.7	93800.9	96061.2	92329.1	90649.2	83976.6	89266.7	85449.3	86331.2	84833.9	83780.3	82585.7	89816.5	83726.3	85104.2	83549.7	85014.2	82457.7	85104.2	83673.1	91542.6	82838.3	90271.3	84881.6	84765.2	88694.9	83124.5	84478.4
GAA	217466	217441	219937	218058	221020	212744	212542	214864	230772	220651	217039	210518	216074	223080	217237	216604	217558	212489	218786	216481	211695	226797	229569	225067	228670	221460	213743	216916	217981	216426	213106	213264	211084	217659	208728	212833	211973	219389	217127	227362	217885	230702	212147	224068	232882	226744	356512	219692	226649
GAC	137568	141388	137878	140083	135578	139590	138898	142306	135084	142301	138560	140083	146735	137388	138645	140083	137377	139691	148523	138872	141991	130891	132425	138227	134347	135241	140884	138886	137427	139492	140083	138691	142853	136533	140164	140131	138349	140604	143783	139476	141835	134284	145317	136462	140153	140668	122578	142782	149057
GAG	212131	219027	210941	209966	215453	218490	213481	216836	210114	211683	217667	215371	215105	221585	217705	213420	212328	217213	222076	216441	222703	206817	210236	216606	212762	210194	215019	213378	203926	212483	202200	198799	199454	206270	186897	203242	199488	198886	224056	212900	219631	214195	222871	209681	217664	212797	203322	218200	211041
GAT	156675	157045	158660	160186	158315	157016	153477	157358	160995	161594	158091	151253	161145	159221	158329	156656	156945	153746	162926	156349	151444	162501	162491	161806	162032	161536	155619	155748	158350	154514	156623	158468	157955	157680	162199	153332	156628	166807	153568	158527	154059	162539	160082	160141	161212	161978	185179	156366	169646
GCA	102142	103033	102397	105099	104561	102390	102348	99752.5	105183	101201	102844	100948	104794	105171	103437	101111	103524	102945	96956.4	103010	101284	108525	108110	108747	107969	105273	101356	103472	102268	102744	101352	101965	98272	104580	99241.4	98900.5	99191.3	101862	101263	104433	101532	106587	101489	105364	103648	100636	115371	101422	96759.4
GCC	135259	139683	133329	149702	133009	141987	135759	139884	130968	137678	134754	138567	163137	136020	137792	137339	134989	137713	148938	136648	141888	131147	129969	143543	130112	133255	137906	135372	129757	133676	129050	127273	130070	129131	122904	131446	129186	125523	142451	149280	138485	130059	145161	130797	136673	136626	114474	138977	146497
GCG	34626.1	36673.2	32932.9	39144	33196.7	34893.1	33355.6	34799.1	33689	32474.2	34969.3	34638.6	43275.3	33660	34156.6	34110.7	34917.6	34643.5	33453.6	35021.3	35430.2	32640.4	32674.6	34080.7	32482.3	33125.3	34142.9	32879.8	32587.2	32476.7	32705.4	32302.8	33396.3	32343.2	30506.7	33683.2	33321.8	30591.2	35978.2	37267.8	34695.8	31690.5	34192.2	31681.9	32214.2	32762.9	17289.7	33665.5	30492.8
GCT	113674	111963	111697	119397	115419	116156	112251	114086	115462	129828	111871	109776	120836	115952	113758	114174	111504	112017	155963	112209	109747	118558	116639	131793	115784	115424	114580	113457	113376	109916	109551	108459	106250	110901	106715	108013	106625	107980	112854	125362	112634	117382	118429	115070	120268	120729	147700	119404	182385
GGA	104967	102824	107593	108580	103343	103672	102594	111866	106951	133547	106234	102391	110911	102658	104072	112746	105928	101063	161496	104166	102911	106506	105839	102833	104885	107485	111727	103656	114131	105258	108992	111694	109364	103480	115569	105963	109618	111175	109057	115419	106600	104428	107705	105685	114373	120568	118886	122278	203354
GGC	108339	110021	107815	113338	104516	111231	107500	120249	103996	134128	106872	110215	120290	106096	107547	117454	109023	107913	174981	109125	112579	98977.4	100190	105538	99402.7	103102	115515	104399	110484	106245	108268	105262	111144	100671	104266	105250	105453	103715	119627	120495	114621	101410	118585	104053	117074	123816	94784	125527	204979
GGG	79338.2	79194.1	80502.7	73263	76881.9	81082	79089.6	83430.6	76924.1	84903.9	79699.9	81190.9	70805.7	77691.3	79944.9	82007.3	79657.6	78702.2	89194.1	79911.7	82921.2	74185.6	74886.4	74948.7	74572	78137.6	83067.1	77409.5	80534.5	80015.3	79348	78021.7	80577.6	75882.9	78376.6	78633.8	79021.7	77683.4	84938	73145.1	81799.2	74548.1	84081.7	76496.9	80479.9	82539.3	53493.4	88144.9	93996.2
GGT	66213.7	64523.3	66452.1	69286.7	66639.9	66840.6	64307.8	76596.9	66620.4	114362	64379.5	64565.7	68984.3	67384.7	66273.9	77066.4	66409.3	64186.2	182206	65840	65184.8	67237.6	65893.4	63393.4	64925.8	65949	74475.7	63180	73220.7	63993.1	63912.5	64510.7	63225.8	62481.4	65720.5	62078.5	63457.7	64295.9	71103.3	84547.9	69476.8	68093.9	72891.5	68202.3	81449.8	89997	89178.6	87588.8	251410
GTA	51088.3	50149.8	49510.6	50397.4	51752.7	50086.7	49583.3	48362.1	53841.8	49193.3	51072.4	48919.3	48369.3	51591.2	50303.7	48785	50049.2	49126.9	45031.7	49326.7	47604.2	53807.1	53397.7	52080	53253.8	52366.5	48786.8	50180.8	49747.5	49034.8	50325.5	50932.4	49772.3	51372.2	51352.6	50040.4	50521.8	51455.4	49703.4	50965.2	49218.7	53490.8	48957	52475.4	52860.9	50697.7	87474.5	49076.1	45264.3
GTC	73701.3	73063.8	72719.3	72302	70658.8	72990.3	73165.6	72021	73312.7	73673.8	73717.3	71897.5	73644.9	70205.9	70820.5	71928.7	71483.7	71421.3	75442.9	71678.7	72366.1	67760.1	67951.3	75853.8	68658.1	71027.5	73769.1	72830.9	70333.4	71604.9	74598.3	75255.9	75975.2	71884.4	74655.1	74280.3	74743.9	72234.8	77093.5	74257.6	73721.5	69463.7	76155.3	71373.4	74471	73864.4	106926	73998.6	76519.5
GTG	140621	138974	135795	155056	137141	144750	140725	140308	136953	137516	137078	139945	167062	136243	138385	135408	136150	137699	139173	138234	140069	135107	132614	148426	132446	138262	140838	140164	133536	136962	135815	134430	136742	135551	133574	136073	135112	132014	145710	153730	142304	133866	148891	136761	141617	139726	165633	139877	135459
GTT	77218.7	74910.9	75650.7	79970.8	77828.7	74884.6	75427.7	75051.4	80686.9	78339.6	76127.5	73323.1	78792.5	76944.7	74909.3	74010.1	75528.7	74702.6	77685.4	74991.3	71877.7	81274.6	80221.2	80406.3	79053.6	77835.1	75319.8	76426.4	76433.4	73854.4	76177.6	77129.3	75447.4	77595.3	78440.5	74416.2	76533.6	77066.3	76871.1	83157.4	77355.8	80073.6	74445.7	80323.5	82271.9	81073.3	157480	76043.8	83460.3
TAC	75131.8	76476.8	75408.1	72977.4	72424.1	74536.7	75590.5	76285.8	73211.7	74987.5	75512.9	75596.8	73528	72102.4	73015.8	73893.7	73732.7	74664.8	75201.5	74300.5	74946.1	69598.4	70358.4	77220.8	70127.4	71406.2	75817.1	75764.9	73070.1	74225.5	76407.2	77932.2	78759.5	74382.5	78504	76682.1	78240.8	75960.8	77458	72171.7	76092.3	71042.4	74911.9	72534.9	74305.2	75229.5	76171.1	73372.5	75234.6
TAT	75331.3	73502.8	76944.6	73600.7	74475.5	74286.3	74110.8	72597.4	76974.6	73204.5	74923.6	72567.5	70508.6	73370.5	73296.7	72058.5	74310.2	72430.2	67514.4	73570	70413.2	76524.9	76140.5	80960.6	75710.4	76698.2	74272.9	75236.5	74515.6	73402	76133.6	78366.1	77502.5	75653.9	81332.5	75724.5	78600	79062.5	72586.1	71267.8	72088.9	75848.2	72736.1	75627.5	74607.4	73884.6	96919.5	70728.6	68359
TCA	83589.8	84374.3	84303.4	83102.8	85585.4	81565	84542.6	80830.4	88338.9	82661.4	85016.9	84035.8	81115.6	86676.4	85594.3	84446.6	85985.9	85269.4	76266.7	85242.3	84377.9	90124.2	90469.8	80197.9	90817	87075.1	83642.9	86664.3	85098.2	86795.5	87945.3	87852	85588.8	89062.7	86524	84586.2	86077.7	88387	81137.3	81001.9	83147.9	88083.3	81750.4	88361.6	83223.9	82512.4	85907.7	82042.7	74724.7
TCC	92060.9	96433.1	94047.8	97045.2	91044.2	91755.7	93954.4	91319	91950.3	93484.5	94592.8	96290.5	104565	93102.6	94541.8	96669.9	95883.8	95593	92242.3	96126	99252.5	89848	92089.1	92763.8	93609.5	92407	94688	95358.6	94922.4	98631	98462.8	97670.7	97471	94293.1	94541.8	97002.4	97105	95029	95976.2	94073.5	94334.6	89894.2	94183.9	92508.9	89104.7	89815.4	68094.2	93724.4	88522.9
TCG	23257.1	24626.7	22703.3	20317.4	22545.3	22396.8	23341.6	23408.3	23208.5	22738.2	23717.3	24329	20108.4	23346.9	23742.1	24640.1	24734.6	24389.3	22963.9	24535.9	25218.4	21393	22449.5	23828.2	23065.7	22454.2	23202.5	23185.4	23132.8	23881.2	24292.7	23794	25100.4	23660	23830.8	24813.8	23966.3	23317.6	24364.3	19468.3	23523.3	21962.8	22691.2	22518	22085	22413.5	11937.4	23257.1	20415.1
TCT	102117	104219	102478	107901	105359	100201	103844	100227	106547	104627	103115	102829	110039	106878	104707	103933	105212	104678	103176	105148	103385	109911	109972	95809.9	110238	104791	101591	105561	105684	106452	105040	104948	103385	108481	102798	99940.2	102666	106011	101232	106311	102867	107748	100090	108214	103021	102128	105610	101604	104713
TGC	56036.9	54321.6	63682.4	49098.6	52941.1	57319.7	56546.7	59097.1	53311.5	62940.5	53785.2	57926.4	46684.3	52001	56504.5	57631.2	54764.6	54370.4	66632	54254.3	57773.8	50025.4	51292.8	70237.2	51735.9	55974.9	58915.8	55862.2	58633.3	58863.7	55551.3	56271.7	57445.8	52340.3	59259	52951.2	56546.7	58062.7	60020.3	49087.9	59638.8	51192.3	59836.3	53451.6	57031.7	58222.7	43550.4	60396.2	70548.1
TGG	62881.4	59586.7	60548.9	65575.8	61087.4	61509.7	62761.5	61874.9	61897.9	59747.8	61816	60895.2	66597.9	58832.1	59344.8	57655.2	57861.2	59551.1	56635.1	58466.5	59484.6	61221.4	59668.3	60376.7	59436.1	60673.8	59354.2	62762.6	59520.9	61260.5	61324.2	62587.7	64040.1	60200.3	64067.2	62262.5	63154.2	62888.7	61381.3	62437.5	61853.4	59805.6	60613.4	61104.9	59090	61854	75258.6	57725	57032
TGT	58488.8	56205	67543.8	57246	58084.3	61136	58532.3	58455.9	58463.3	62355.8	56560.5	57383.7	55864.3	57507.3	60676.5	59643.7	58770.7	56941.7	58612.4	58211.2	56861.4	60553.7	60165.5	65898.2	60197	63469.2	59648.6	59320.9	62117.7	62545.4	60424.8	61459.2	62377	58412.6	68384.7	57262.3	60792.4	68481.4	56539.4	55136.9	59241.3	58412.6	61545.9	58617.9	58072.6	58969.1	48709.6	58688.3	59570.9
TTA	57404.2	56816.6	57597.2	58678.9	59913.7	56206.7	58677.7	56730.8	60559.4	55570.6	57514.9	56308.2	55825.4	59565.7	58366.8	55921.5	57726.2	57879.4	49453.8	57557.1	55599.3	64692.3	64989.9	61150.5	64384.8	61239	54682.3	60824.2	58488.9	58295.9	57313	57236.9	56485.9	61987.5	58277.8	57152.7	58336.7	60395.6	53498.6	55623.7	54968.2	63357.8	52997.9	61717.7	56118.2	56373.4	50636.4	54613.1	48705.9
TTC	94268	91019.2	90813.2	102772	90822.3	94266.1	95755.6	93399.2	89020.8	92684.6	89993.6	92903.1	108242	89118.6	89651.9	88183.8	86621	93143	96949.2	89332.6	90134.8	89312.1	87853	103869	87364.9	90124.8	91311.6	94988.5	87537.3	90426.4	88220.6	88894.7	93388.1	92312.6	90037.1	90602.7	92230.7	87142.4	94067.3	100401	92844	88013.7	93096	91155	88765.8	90709.8	80680.6	91545.5	99905.6
TTG	81081.6	78450.5	80603.8	84186.3	83539	81211.2	82588.7	79855.1	82909.3	78631.6	78773.8	79922.7	83443.4	82825.2	81859.2	78297.2	80675.8	81739.2	73183.1	81518.7	79378.7	87259.1	87036	84987.6	86121.4	84410.6	78643.8	83696.9	80440	82182.9	80923	78119.9	77727.8	84838.4	79488.5	80077.4	78894.6	79696.2	76576.6	79194.2	78803.8	85018.7	77398.6	83922.1	76764.3	77939.6	54712.1	77064.9	71081.1
TTT	104141	101300	104156	107976	104506	104473	105431	98889.9	105032	99710	102933	101252	106109	103378	103604	98853.3	101955	103584	91204.6	103707	98741.3	110758	109609	119055	107683	108796	101271	106926	102241	103606	104021	104950	104282	108375	108822	104957	105355	104249	97815.5	101096	99587.2	106076	101022	106839	96943.4	97360.6	84895.2	97997.2	90400.8
[truncated: 123 more columns]
