# Supplementary material for: Cell type–specific analysis by single-cell profiling identifies a stable mammalian tRNA–mRNA interface and increased translation efficiency in neurons
Source: HighWire-hosted journal article supplement (doi:10.1101/gr.275944.121), 2021-12-02
Supplement: Supplemental_Table_S11.xlsx [file Supplemental_Table_S11.xlsx]

## Sheet: AA_demand
# Table S11. Fetal human AA demand usage by cell type matrix
	Adrenal Adrenocortical cells	Adrenal Chromaffin cells	Adrenal CSH1_CSH2 positive cells	Adrenal Erythroblasts	Adrenal Lymphoid cells	Adrenal Megakaryocytes	Adrenal Myeloid cells	Adrenal Schwann cells	Adrenal SLC26A4_PAEP positive cells	Adrenal Stromal cells	Adrenal Sympathoblasts	Adrenal Vascular endothelial cells	Kidney Erythroblasts	Kidney Lymphoid cells	Kidney Megakaryocytes	Kidney Mesangial cells	Kidney Metanephric cells	Kidney Myeloid cells	Kidney Stromal cells	Kidney Ureteric bud cells	Kidney Vascular endothelial cells	Liver Erythroblasts	Liver Hematopoietic stem cells	Liver Hepatoblasts	Liver Lymphoid cells	Liver Megakaryocytes	Liver Mesothelial cells	Liver Myeloid cells	Liver Stellate cells	Liver Vascular endothelial cells	Cerebellum Astrocytes	Cerebellum Granule neurons	Cerebellum Inhibitory interneurons	Cerebellum Microglia	Cerebellum Oligodendrocytes	Cerebellum Purkinje neurons	Cerebellum SLC24A4_PEX5L positive cells	Cerebellum Unipolar brush cells	Cerebellum Vascular endothelial cells	Muscle Erythroblasts	Muscle Lymphatic endothelial cells	Muscle Lymphoid cells	Muscle Megakaryocytes	Muscle Myeloid cells	Muscle Satellite cells	Muscle Schwann cells	Muscle Skeletal muscle cells	Muscle Smooth muscle cells	Muscle Stromal cells
A	386413	392001	380036	410685	386315	395858	383447	389309	380826	401191	384602	385867	419512	391481	389259	388938	389047	391109	438046	388907	390924	390691	385789	415574	385948	387690	389429	383894	381899	381120	375112	370089	367470	380417	362049	374885	371934	369007	389851	413227	387711	384872	396980	381986	391457	387655	402082	396283	459382
C	114737	110710	131116	105661	111063	118585	114999	117791	110476	125299	110393	115892	99574.7	109698	117216	117943	114749	112401	126031	113052	115395	110529	110997	135292	111817	119633	119006	114798	122000	122149	116740	117759	119654	111770	128596	111055	118489	127599	115759	103445	118992	109365	120686	111799	114710	116262	93953.5	119936	131046
D	294786	298928	296288	298338	293992	296930	292172	300273	292640	303902	296777	292806	298951	297123	297062	298429	297466	296308	313406	296761	295381	293258	293696	298175	296072	297247	297607	293650	298838	295797	298659	297230	300385	296914	304620	295705	297867	309974	295309	295774	296172	296172	303646	295886	300332	300246	313406	301288	320972
E	430390	437192	430514	425272	436620	431704	425727	432575	435764	432345	434890	428038	418675	445436	435071	432475	434480	433907	443632	435180	437279	433416	437984	438938	440976	432339	430359	428857	426272	431521	418041	412162	409960	427822	398578	419252	415493	421763	438154	436967	437927	443921	432522	432700	449003	436056	570110	441024	440806
F	198776	192639	194805	209393	195395	198956	201047	192679	191798	192400	193008	195135	208134	192831	193313	188103	190591	198652	189336	194047	190128	199979	196644	221543	194846	199236	193299	201240	191741	195214	193508	193892	197392	202530	200344	197053	199522	192987	190565	199989	192612	193664	193004	197515	185073	186579	168615	190898	191661
G	359520	357155	362058	362125	351499	363221	353246	392938	350374	466953	357337	360171	360232	354443	357944	391492	364876	355308	611697	360917	366006	346748	345374	344566	343429	355236	386217	347479	382285	357677	362895	359575	363799	345660	366648	354613	361054	359845	382084	390661	372847	347715	381064	353580	392029	413613	362882	426569	759105
H	148230	145817	147881	161415	147674	144184	148443	142467	146994	144331	145926	148687	169140	148400	147386	147710	150945	149919	138712	150192	150491	150895	152013	149425	152392	149178	148166	150833	149693	153103	148908	146692	146241	151851	145974	147011	146450	150723	143311	152648	145564	148352	140620	147648	140655	138952	105385	142353	135372
I	263546	260672	259222	252915	258999	261064	259418	260797	261863	258566	259286	256363	238678	256478	255215	254896	257254	255881	253046	257644	252664	258389	257288	249270	255424	262755	256125	259181	257259	256625	269417	267568	268826	265601	279472	270282	273509	273135	259472	251884	258388	260659	258678	260022	259955	261919	343745	258105	256322
K	362485	363614	358139	378004	374195	365465	362123	360427	366149	361600	356127	358800	378986	386456	365031	359870	363179	370942	368224	366828	362602	370199	375523	383288	376249	364834	359710	364339	358849	357810	347298	341470	339750	363408	330923	345556	344153	352870	363058	390799	368158	381351	367620	371700	381638	366753	527414	368862	364019
L	541839	530995	534724	571399	545799	550148	552374	534640	533610	524515	532154	541487	571426	543750	542806	523386	533894	550504	511082	538976	540656	559597	553562	566657	550211	554185	533057	556771	529948	546256	528981	514436	519389	554141	515548	533788	529572	521613	528863	547312	533502	546985	533428	545337	516469	516907	431160	528927	501094
M	127660	126733	125844	130014	129605	128532	129475	124417	125228	124160	125829	127225	127952	130240	127727	125716	126947	130820	122173	127400	127196	127693	128824	122747	129424	128391	125357	128021	125113	125115	123884	124187	123391	130511	119166	125189	123921	124219	121895	123251	123837	129264	126094	129279	121321	119712	91208.4	123413	117170
N	227207	228679	233285	226840	226481	225846	228795	228652	226743	233911	229017	226682	223054	226990	227521	230477	231235	230377	229969	229312	226558	228437	229974	223825	231420	230592	225868	228149	234051	231292	240265	238616	236690	235163	250084	233851	235771	245276	223218	220485	224115	229177	225764	231609	221978	226627	208078	227189	234432
P	356195	356514	359169	339523	352451	348655	354331	362792	358037	427176	356800	362982	335491	360988	359692	384771	372243	366019	519648	363697	372450	346159	354340	339546	360550	352837	374599	351356	377207	361541	357333	356142	346750	355368	347196	347529	348599	350008	372230	365059	369195	351815	362366	361264	383740	382191	455545	401609	608688
Q	284808	285583	288572	281178	292147	290579	289671	286873	288122	289617	286110	289667	275945	296719	295126	292632	295189	295710	288231	293239	298506	292799	296696	281922	299482	298573	284872	292144	291663	297870	283035	275080	270670	295522	270840	284492	279134	279351	282340	275416	291426	296311	291747	291102	281868	280566	212966	287984	284340
R	313512	308921	311377	300795	313230	310359	307020	307585	312583	318721	312109	312960	292274	321139	312152	314359	317463	314172	330272	316822	318337	309918	312517	301657	312256	309701	314144	306380	310310	311535	304412	303006	300794	306334	297189	309086	304418	304297	312250	301156	312058	310604	309054	306542	313427	306297	301940	317152	336695
S	494065	507533	498486	495692	495814	481157	499447	484445	500787	499833	504541	507580	496393	505077	502864	512941	518072	512244	489991	512063	516963	503902	511077	471294	517739	499239	498400	505907	512342	520887	520136	517422	511573	521585	508303	506685	513940	516351	493503	483686	497949	499727	481816	507021	484701	481908	453452	498412	482363
T	310595	317344	311801	317734	308214	307570	307715	314646	311610	316024	314082	313783	320127	309602	308375	315684	316229	310014	315769	313538	314105	309685	308646	316784	310527	310431	317388	310534	316566	316933	328064	328962	332408	316231	333587	323933	327733	328601	318238	321721	317941	310303	312763	311127	320192	318032	417265	313678	321140
V	343262	337657	333395	355427	337495	343086	338666	336423	340789	338732	338138	335770	357201	335566	334517	332012	336772	336209	339452	335974	334118	337794	332801	354557	333066	340029	339975	338468	333466	333475	339135	337829	337461	339491	340545	337367	340213	335545	346979	359400	342922	336155	346450	340109	350017	342623	527013	341420	343129
W	62997.6	59685.6	60497.8	65154.3	61108	61576.8	62717.9	62000.4	61178.7	59749.3	61842.2	61202.5	64666.6	58934.1	59362.5	57983.7	58479.5	60133.8	56990.9	58771.6	59879	61193.4	59421.3	60002.8	59374.6	60769.9	59575.2	62552.8	60136.7	61633.6	61728	62602.7	63949.9	60753	64545.4	62738.1	63773.1	63413.1	60959.8	61970.3	61911.5	59674.5	60265.6	60957.2	58887.5	61363.5	76640	58137.8	57438.1
Y	150741	150228	152224	145636	146949	148985	149597	149185	148441	148196	150500	148912	139860	145725	146356	146784	149625	148534	143613	148642	146323	146056	145892	157202	145687	148339	150649	150497	149113	148527	153545	156336	156042	151414	161030	153571	158378	156316	149014	142366	148320	146568	146801	147804	148402	147932	176268	145132	144616
[truncated: 123 more columns]
