# Supplementary material for: Cell type–specific analysis by single-cell profiling identifies a stable mammalian tRNA–mRNA interface and increased translation efficiency in neurons
Source: HighWire-hosted journal article supplement (doi:10.1101/gr.275944.121), 2021-12-02
Supplement: Supplemental_Table_S12.xlsx [file Supplemental_Table_S12.xlsx]

## Sheet: tRNA_expression
# Table S12. Fetal human tRNA gene expression by cell type matrix
	Adrenal Adrenocortical cells	Adrenal Stromal cells	Adrenal Vascular endothelial cells	Adrenal Chromaffin cells	Adrenal Sympathoblasts	Adrenal Schwann cells	Cerebellum Purkinje neurons	Cerebellum Astrocytes	Cerebellum Granule neurons	Cerebrum Limbic system neurons	Cerebrum Excitatory neurons	Cerebrum Inhibitory neurons	Cerebrum SKOR2_NPSR1 positive cells	Cerebrum Astrocytes	Cerebrum Astrocytes Oligodendrocytes	Cerebrum Vascular endothelial cells	Eye Retinal progenitors and Muller glia	Eye Photoreceptor cells	Eye Ganglion cells	Eye Retinal pigment cells	Heart Cardiomyocytes	Heart Smooth muscle cells	Heart Lymphatic endothelial cells	Heart Stromal cells	Heart Lymphoid cells	Heart Vascular endothelial cells	Heart Cardiomyocytes Vascular endothelial cells	Heart Endocardial cells	Heart Myeloid cells	Heart Erythroblasts	Intestine Intestinal epithelial cells	Intestine Lymphoid cells	Intestine Smooth muscle cells	Intestine ENS glia	Intestine Chromaffin cells	Intestine Vascular endothelial cells	Intestine Stromal cells	Intestine Myeloid cells	Intestine ENS neurons	Liver Erythroblasts	Liver Hematopoietic stem cells	Liver Hepatoblasts	Liver Lymphoid cells	Liver Myeloid cells	Liver Vascular endothelial cells	Liver Stellate cells	Liver Megakaryocytes	Lung Stromal cells	Lung Bronchiolar and alveolar epithelial cells
tRNA-Asn-GTT-5-1	3.72938	8.02087	5.59845	18.8759	8.34689	8.76731	9.23278	39.026	20.6747	1.14731	4.09461	4.3525	1.96291	2.28195	8.0209	3.91773	26.0298	20.3561	3.10719	15.7953	10.5311	4.44929	0	8.45175	7.03971	9.19687	7.92228	11.6897	3.82012	6.30043	2.44771	0.700095	7.78111	8.78849	4.01331	12.744	3.60858	0	14.4703	3.53596	10.9749	4.13198	4.03628	13.708	16.7826	9.73058	14.1899	8.6946	9.97714
tRNA-Glu-TTC-4-1	4.26727	23.2183	20.9942	73.4812	79.2954	39.4529	24.6207	39.026	45.9439	13.7677	17.443	15.2338	40.2397	15.4031	25.7815	13.7121	43.5998	37.3196	59.0366	21.0604	27.5428	42.2682	31.3817	18.8922	14.5823	23.6491	23.4734	13.151	19.1006	26.7768	10.9427	7.70104	22.0465	23.436	20.0665	19.116	19.3317	12.5908	45.4779	9.78033	21.9498	11.6835	2.69085	7.61554	10.4168	24.3265	14.1899	14.6771	14.6961
tRNA-Gly-CCC-1-1	2.72532	1.6886	0	2.02242	0	4.38366	0	0	2.29719	0	0.73703	0.8705	0.981456	1.71146	0.572921	0	1.30149	1.69634	0	5.2651	1.44015	0	0	1.49149	1.50851	1.31384	0.586836	1.46122	0	0	1.58381	0	2.5937	0	0	3.18601	2.83531	0	4.13436	1.54228	0	0.997375	0	1.52311	0.578712	1.21632	4.05426	3.03115	2.29205
tRNA-Gly-CCC-1-2	0.896486	0.422151	0	0	0	0	0	3.54782	2.29719	0	0.327569	0.8705	0	0	0.572921	0	1.95223	1.69634	0	0	0.630065	0	0	2.48581	0	0	0.293418	2.92244	0	0	0.575931	0.700095	0	2.9295	0	3.18601	1.03102	0	0	0.4514	0	0.427446	1.34543	0	0.578712	0	2.02713	0.638136	0.808957
tRNA-Glu-TTC-3-1	10.1482	20.6854	19.5946	115.278	87.6423	26.3019	43.0863	35.4782	39.0523	16.0623	22.4385	16.9748	17.6662	22.8195	14.896	23.5064	29.2835	35.6232	34.1791	36.8557	29.253	20.0218	31.3817	15.9092	19.6106	17.0799	27.5813	16.0734	3.82012	15.7511	9.50287	7.70104	15.5622	35.154	12.0399	15.93	19.5894	2.09847	37.2092	12.4887	18.2915	13.8208	9.41798	8.37709	6.36583	19.4612	8.10852	18.1869	13.8871
tRNA-Asn-GTT-4-1	115.181	105.116	85.3764	154.378	116.856	109.591	141.569	131.269	71.213	68.8385	56.9151	41.784	84.4052	77.5862	96.8237	101.861	89.1519	47.4976	105.644	89.5066	97.7951	109.008	89.6619	77.5573	64.363	67.0058	103.283	109.591	141.345	34.6524	65.5122	42.0057	92.0765	84.9554	76.2528	95.5802	89.9566	67.1511	101.292	11.8492	32.9247	78.2227	29.5994	109.664	90.8578	68.1141	34.4612	98.1134	103.816
tRNA-Lys-CTT-7-1	1.5061	0.422151	1.39961	0	4.17344	0	6.15519	7.09564	2.29719	0	1.71974	0.8705	1.96291	1.71146	1.71876	1.95887	1.30149	1.69634	0	2.63255	3.78039	0	4.4831	1.98865	2.51418	1.31384	2.05392	2.19183	0	6.30043	2.01576	1.40019	1.29685	2.9295	0	3.18601	1.28878	0	2.06718	1.50467	0	1.5673	2.69085	0	0	1.21632	0	1.67511	1.07861
tRNA-Cys-GCA-7-1	2.43844	1.6886	1.39961	3.3707	4.17344	4.38366	3.07759	10.6435	6.89158	6.88385	4.25839	3.04675	1.96291	2.28195	3.43753	3.91773	3.90446	5.08903	3.10719	2.63255	4.05042	0	0	4.47446	3.01702	9.19687	2.34734	5.84487	7.64024	1.57511	4.31948	2.80038	3.89055	5.85899	0	0	2.83531	2.09847	4.13436	2.257	3.6583	4.41695	1.34543	3.04622	1.15742	0	4.05426	2.55254	5.93235
tRNA-Arg-TCT-1-1	175.424	168.438	222.538	217.747	237.886	140.277	64.6294	124.174	84.9962	61.9546	64.2035	90.532	83.4237	201.382	146.668	139.079	242.077	281.593	83.8941	139.525	183.034	153.5	192.773	147.16	168.953	203.645	191.308	179.73	198.646	144.91	198.408	202.327	168.591	199.206	168.559	219.834	160.839	207.749	188.113	172.698	182.915	216.573	227.377	212.474	226.855	170.285	184.469	142.225	180.667
tRNA-Asn-GTT-10-1	1.68539	2.11075	0	2.02242	0	0	3.07759	3.54782	0	0	1.47406	0.43525	0.981456	0.570487	2.86461	9.79433	0	1.69634	9.32156	0	3.73538	0	0	4.47446	4.02269	2.62768	2.05392	3.65305	7.64024	1.57511	2.15974	2.10028	2.5937	2.9295	4.01331	3.18601	2.3198	6.29541	2.06718	1.42943	3.6583	1.5673	0	34.2699	1.73614	1.21632	6.08139	22.4943	3.64031
tRNA-Lys-CTT-2-1	90.6527	103.005	54.5849	91.6829	70.9486	96.4404	92.3278	92.2433	84.9962	67.6912	67.7248	72.6868	92.2568	86.714	91.0945	94.0255	85.2475	45.8013	87.0013	121.097	90.4143	97.8844	85.1788	105.896	93.5275	68.3196	77.1689	89.1343	64.9421	83.4807	86.3897	36.4049	125.795	96.6734	100.333	86.0222	102.329	48.2648	66.1497	37.1276	65.8494	60.6974	40.3628	75.3938	66.5519	94.8732	75.0038	120.209	81.9743
tRNA-His-GTG-1-1	131.963	135.51	124.566	155.052	166.938	113.975	144.647	138.365	112.563	151.445	109.49	140.151	137.404	148.897	142.085	129.285	131.45	94.9953	114.966	144.79	157.966	149.051	174.841	178.978	154.371	140.581	151.99	158.542	103.143	157.511	159.389	114.816	169.888	149.404	176.585	152.928	153.107	125.908	159.173	83.8851	120.724	132.793	118.397	124.133	97.8023	137.445	121.628	158.976	153.972
tRNA-Gly-TCC-2-1	99.9403	105.116	90.9748	105.84	95.9892	122.742	104.638	163.2	101.077	136.53	84.7584	124.482	125.626	111.245	124.324	64.6426	98.9131	66.1574	114.966	121.097	125.563	120.131	94.145	133.737	128.223	109.049	129.104	127.126	118.424	110.258	104.819	88.212	108.936	131.827	116.386	111.51	100.009	88.1358	103.359	93.8535	98.7741	103.584	102.252	112.71	89.7003	105.82	91.2209	125.234	118.243
tRNA-Glu-CTC-1-1	123.428	120.735	92.3745	111.907	108.51	96.4404	147.724	124.174	117.157	151.445	116.451	139.28	145.255	126.648	136.355	107.738	110.626	69.5501	146.038	89.5066	116.742	93.4351	107.594	129.759	97.0474	69.6334	112.966	130.779	64.9421	107.107	114.178	77.0104	110.232	131.827	100.333	105.138	102.587	86.0373	130.232	148.774	128.041	110.851	100.907	72.3476	87.3855	122.849	109.465	116.619	102.063
tRNA-His-GTG-1-2	14.4872	7.17657	1.39961	2.02242	0	17.5346	40.0087	21.2869	9.18878	5.73654	3.19379	3.482	5.88873	0.570487	4.01045	1.95887	10.4119	1.69634	31.0719	10.5302	6.93071	4.44929	8.96619	2.48581	5.5312	6.56919	4.40127	6.57548	3.82012	3.15022	3.59957	7.00095	3.89055	5.85899	12.0399	0	4.89735	8.39388	6.20154	2.59555	3.6583	5.5568	9.41798	3.80777	0	1.21632	2.02713	6.38136	13.6174
tRNA-Gln-CTG-4-1	14.0928	10.5538	0	10.1121	12.5203	8.76731	18.4656	14.1913	9.18878	3.44192	3.60326	2.17625	11.7775	4.56389	6.30214	1.95887	16.2686	13.5708	15.5359	10.5302	10.4861	20.0218	4.4831	10.9376	4.52553	9.19687	4.9881	8.76731	7.64024	11.0258	24.4771	7.00095	10.3748	11.718	24.0798	6.37201	8.76368	6.29541	8.26872	13.0154	14.6332	5.5568	5.3817	3.80777	3.47227	17.0285	26.3527	5.18485	10.9209
tRNA-His-GTG-1-3	3.65766	3.79936	1.39961	10.1121	16.6938	4.38366	27.6983	10.6435	11.486	11.4731	6.71516	13.4928	13.7404	11.9802	5.15629	1.95887	5.20595	3.39269	3.10719	5.2651	5.58057	8.89858	8.96619	5.96594	4.02269	3.94152	4.9881	5.84487	0	0	2.15974	1.40019	9.07796	2.9295	0	6.37201	6.18613	2.09847	10.3359	2.29462	7.3166	1.28234	2.69085	0.761554	0.578712	4.86529	2.02713	5.66346	2.83135
tRNA-His-GTG-1-4	2.33086	3.37721	0	3.3707	12.5203	0	9.23278	0	6.89158	5.73654	2.37487	1.30575	6.87019	2.28195	2.86461	3.91773	1.95223	3.39269	9.32156	0	2.79029	2.22464	4.4831	6.96027	6.03403	2.62768	2.64076	2.92244	0	4.72532	2.15974	0	3.89055	8.78849	0	0	3.35082	2.09847	4.13436	1.16612	0	0.712411	0	2.28466	0.578712	3.64897	2.02713	3.11091	2.42687
tRNA-Gln-CTG-7-1	1.75711	1.26645	1.39961	2.02242	4.17344	4.38366	9.23278	10.6435	4.59439	8.03116	2.21109	3.91725	2.94437	2.28195	4.58337	1.95887	13.0149	10.1781	9.32156	13.1627	7.65079	6.67393	8.96619	3.9773	6.53687	9.19687	6.74861	8.0367	7.64024	6.30043	4.75143	3.50047	2.5937	11.718	4.01331	3.18601	6.95939	4.19694	6.20154	3.94975	10.9749	2.99212	1.34543	1.52311	0	1.21632	6.08139	3.90858	6.74131
tRNA-Asn-GTT-7-1	78.2453	56.1461	8.39768	97.7502	112.683	26.3019	73.8622	53.2173	57.4299	64.2492	57.1607	60.0645	60.8503	77.5862	62.4484	41.1362	95.0086	135.708	133.609	92.1392	65.5267	35.5943	44.831	26.8467	37.2099	10.5107	61.9112	59.91	57.3018	29.927	65.3682	79.8108	73.9205	43.9425	84.2794	6.37201	43.8184	33.5755	76.4856	13.2034	54.8745	42.7446	59.1987	30.4622	2.89356	31.6244	32.4341	40.6812	65.5255
tRNA-Asn-GTT-2-1	52.8568	42.2151	67.1814	95.7278	83.4689	48.2202	61.5519	28.3826	43.6467	50.4816	34.0671	31.338	52.0172	42.216	46.4066	37.2184	67.6774	57.6757	146.038	78.9764	56.0308	22.2464	44.831	11.9319	42.2382	34.1598	54.2823	40.1835	26.7409	36.2275	45.6425	32.9045	63.5457	43.9425	36.1197	60.5341	27.8376	14.6893	105.426	6.3196	43.8996	49.1563	26.9085	15.2311	34.7227	18.2448	40.5426	24.4087	84.6709
tRNA-Asn-GTT-3-1	20.3323	13.931	26.5926	24.269	29.2141	21.9183	3.07759	14.1913	22.9719	14.915	8.59868	6.52875	5.88873	7.98681	8.0209	5.8766	16.9193	23.7488	18.6431	2.63255	14.8965	6.67393	31.3817	6.46311	10.5596	3.94152	17.3116	8.76731	0	7.87554	14.2543	5.60076	27.2339	14.6475	12.0399	9.55802	11.8567	4.19694	22.739	1.1285	18.2915	12.2535	5.3817	1.52311	10.9955	12.1632	0	6.06229	16.1791
tRNA-His-GTG-2-1	4.76931	7.17657	6.99807	4.04484	8.34689	0	6.15519	0	18.3776	8.03116	2.94812	2.17625	9.81456	1.71146	1.14584	1.95887	11.7134	5.08903	31.0719	5.2651	12.5113	6.67393	13.4493	8.45175	11.5652	7.88303	7.62886	29.2244	0	9.45065	8.351	4.90066	19.4528	11.718	8.02661	9.55802	14.6921	16.7878	22.739	2.97172	7.3166	4.55943	1.34543	7.61554	10.4168	9.73058	4.05426	5.02532	7.81992
tRNA-Gln-CTG-4-2	5.27134	4.22151	1.39961	2.02242	0	0	0	7.09564	6.89158	2.29462	0.491353	1.30575	3.92582	1.71146	0.572921	0	2.60298	1.69634	6.21438	2.63255	3.82539	4.44929	4.4831	5.96594	4.02269	2.62768	2.93418	5.11427	7.64024	3.15022	3.02364	4.90066	3.89055	2.9295	0	3.18601	3.35082	6.29541	10.3359	2.82125	3.6583	1.70979	0	6.85398	8.68068	2.43265	2.02713	1.59534	3.77513
tRNA-Asn-GTT-6-1	21.9818	11.8202	2.79923	6.74139	4.17344	13.151	33.8535	14.1913	13.7832	8.03116	5.2411	6.52875	11.7775	6.27535	9.16674	9.79433	9.11041	5.08903	24.8575	13.1627	20.7921	11.1232	4.4831	7.95459	13.0737	1.31384	18.4853	32.1468	30.561	12.6009	7.63109	7.00095	12.9685	17.577	12.0399	3.18601	5.15511	14.6893	33.0749	3.49835	3.6583	3.13461	4.03628	14.4695	21.4123	7.29794	10.1357	2.31324	20.0891
tRNA-Val-CAC-4-1	93.7366	91.6068	89.5752	111.233	83.4689	74.5221	83.095	117.078	96.4822	89.49	58.9624	57.8883	90.2939	53.6257	63.0214	58.766	115.182	72.9428	170.895	97.4043	80.0182	88.9858	112.077	114.347	93.0247	76.2026	68.3663	88.4037	133.704	77.1803	80.6304	63.0085	125.795	58.5899	76.2528	98.7662	109.804	113.317	132.299	75.7975	128.041	65.1143	90.1435	122.61	109.377	93.6569	81.0852	113.508	154.915
tRNA-Asn-GTT-12-1	0.824767	1.26645	0	0.674139	4.17344	0	0	0	2.29719	1.14731	0.655137	0	2.94437	0.570487	0.572921	0	2.60298	1.69634	6.21438	2.63255	3.24033	2.22464	8.96619	0.994324	3.01702	1.31384	2.34734	1.46122	15.2805	1.57511	2.73567	2.80038	3.89055	5.85899	12.0399	3.18601	2.83531	12.5908	6.20154	1.16612	3.6583	1.42482	2.69085	2.28466	0.578712	0	0	1.27627	5.6627
tRNA-Val-CAC-5-1	39.9833	57.4125	46.1872	86.964	58.4282	26.3019	70.7846	49.6695	34.4579	59.66	39.5539	44.8308	60.8503	48.4914	46.9796	33.3007	71.5818	59.3721	71.4653	71.0788	42.0793	44.4929	35.8648	61.1509	43.2439	38.1013	40.1982	41.6447	49.6616	37.8026	47.3703	43.4059	59.6552	61.5194	28.0931	38.2321	55.6752	35.674	86.8215	38.1433	51.2162	48.0165	56.5079	49.501	49.7692	64.4651	44.5969	58.2299	71.8624
tRNA-Asn-GTT-8-1	5.19962	8.02087	2.79923	6.06725	0	0	0	0	2.29719	4.58923	1.96541	2.17625	8.8331	0.570487	3.43753	5.8766	9.11041	8.48172	12.4288	10.5302	7.51577	6.67393	0	3.9773	2.51418	1.31384	7.33544	10.2285	11.4604	4.72532	4.31948	2.10028	5.18741	5.85899	4.01331	3.18601	5.41286	12.5908	0	5.22871	7.3166	3.9895	10.7634	5.33088	2.89356	0	18.2442	3.82882	11.5951
tRNA-iMet-CAT-1-1	165.814	180.681	207.143	200.219	146.071	206.032	184.656	195.13	227.422	207.663	243.875	283.348	240.457	209.369	240.054	264.447	199.778	203.561	167.788	205.339	192.26	211.341	192.773	193.893	222.756	223.353	230.333	202.379	233.027	248.867	201.144	248.534	213.98	175.77	232.772	175.23	206.204	230.832	163.307	272.457	193.89	251.196	219.304	282.536	211.23	217.722	212.849	206.198	258.057
tRNA-Arg-TCT-4-1	2.18743	4.64366	0	134.154	121.03	13.151	150.802	49.6695	160.804	178.98	162.802	164.089	177.644	23.9604	67.6047	52.8894	96.9608	44.105	170.895	36.8557	5.98562	8.89858	0	4.47446	9.05105	5.25535	3.81443	8.0367	11.4604	9.45065	2.73567	2.80038	7.78111	5.85899	8.02661	12.744	4.38184	8.39388	76.4856	6.92146	3.6583	2.4222	4.03628	6.09243	6.94454	7.29794	4.05426	2.23348	2.15722
tRNA-Val-CAC-1-1	135.764	134.244	176.351	177.973	121.03	175.346	116.949	127.722	169.992	148.003	134.713	145.374	124.645	164.3	158.699	148.874	161.384	198.472	133.609	160.585	146.535	131.254	121.044	144.177	158.896	128.756	133.212	159.273	194.826	157.511	185.882	169.423	158.216	125.968	172.572	172.044	162.128	220.339	155.038	231.869	124.382	176.535	204.505	194.958	169.563	144.742	133.791	168.548	150.736
tRNA-Glu-TTC-4-2	27.7552	37.9936	25.193	19.55	29.2141	30.6856	43.0863	49.6695	62.0242	47.0396	34.8861	21.3273	44.1655	23.39	26.3544	27.4241	39.0446	20.3561	46.6078	28.958	23.8975	20.0218	17.9324	20.8808	18.1021	26.2768	26.1142	18.2652	22.9207	22.0515	15.6941	21.0028	14.2654	26.3655	32.1064	19.116	15.4653	18.8862	35.142	37.5414	36.583	13.8208	28.2539	21.3235	10.9955	12.1632	26.3527	16.1927	7.55027
tRNA-Asn-GTT-2-2	18.7545	16.886	8.39768	4.04484	0	26.3019	30.7759	24.8347	6.89158	17.2096	10.4822	7.39925	28.4622	7.98681	7.44798	11.7532	5.8567	6.78538	18.6431	15.7953	9.13594	6.67393	8.96619	6.46311	4.02269	14.4522	6.45519	7.30609	3.82012	7.87554	16.558	8.40114	9.07796	17.577	12.0399	0	13.9188	16.7878	8.26872	12.4511	25.6081	6.83914	5.3817	3.80777	3.47227	8.51426	18.2442	12.5234	46.1106
tRNA-Gly-TCC-4-1	37.4373	30.3949	29.3919	36.4035	41.7344	30.6856	36.9311	42.5738	48.2411	5.73654	9.25382	9.5755	25.5179	25.6719	22.9169	5.8766	63.7729	54.283	34.1791	50.0184	36.2737	17.7972	44.831	17.8978	25.1418	31.5321	36.0904	28.4938	34.3811	25.2017	42.7629	35.7048	41.4992	52.7309	44.1464	54.1621	27.8376	44.0679	62.0154	30.7704	43.8996	19.0926	25.5631	22.8466	22.5698	9.73058	42.5697	15.5546	83.0529
tRNA-Asp-GTC-2-1	35.6802	32.0835	23.7934	39.7742	62.6017	26.3019	18.4656	35.4782	32.1607	19.5042	11.9563	12.187	17.6662	32.5177	28.6461	11.7532	57.2655	28.8379	12.4288	21.0604	27.7679	26.6957	13.4493	14.4177	22.6276	27.5906	26.4076	27.0325	26.7409	20.4764	26.0609	23.1031	37.6087	41.013	24.0798	25.4881	25.7755	12.5908	45.4779	31.4851	58.5328	16.6704	13.4543	16.7542	26.042	14.5959	40.5426	13.2413	54.7394
tRNA-Gly-GCC-1-1	0.251016	0.844302	0	1.34828	0	0	3.07759	3.54782	0	0	0.818922	1.741	0	2.28195	0.572921	3.91773	0.650744	0	9.32156	0	1.08011	0	0	0.497162	0	0	1.46709	0	0	0	0.863897	0.700095	0	2.9295	0	0	0.773266	2.09847	2.06718	1.3542	0	0.427446	0	0.761554	1.15742	1.21632	0	0.638136	0.404479
tRNA-Gly-GCC-1-3	0.179297	0	0	0.674139	0	0	0	0	0	1.14731	0.163784	0	0	0	1.14584	1.95887	0	0	0	0	0.360037	0	0	0.497162	1.00567	1.31384	0	0	0	3.15022	0.431948	0	0	2.9295	0	0	0.257755	2.09847	2.06718	0.489016	0	0.284964	1.34543	0	1.15742	1.21632	2.02713	0.398835	1.21344
tRNA-Gly-GCC-4-1	1.43438	2.95506	5.59845	1.34828	0	8.76731	0	3.54782	0	0	1.71974	0.43525	0.981456	0	2.29169	5.8766	4.55521	0	6.21438	2.63255	6.61568	4.44929	0	3.48013	5.02836	3.94152	5.28152	3.65305	7.64024	12.6009	2.44771	1.40019	1.29685	2.9295	0	3.18601	5.92837	2.09847	0	4.66446	3.6583	2.99212	0	5.33088	2.89356	6.08162	8.10852	2.23348	1.88757
tRNA-Gly-GCC-2-1	75.9862	66.6998	81.1776	60.6725	100.163	56.9875	67.707	81.5999	78.1046	82.6062	83.8576	87.05	74.5906	71.3108	79.6361	72.478	85.2475	94.9953	87.0013	94.7717	58.146	64.5147	71.7295	51.2077	73.9169	77.5165	58.6836	76.714	99.3232	83.4807	53.2736	74.9102	62.2489	58.5899	48.1597	60.5341	61.6035	75.5449	80.62	97.6528	58.5328	74.9456	78.0347	91.3865	82.1771	57.1672	60.8139	70.4343	71.5927
tRNA-Leu-CAG-1-6	70.2128	73.4543	88.1756	62.0208	70.9486	70.1385	76.9398	74.5042	82.699	112.436	89.0987	95.755	104.034	83.2911	91.6674	76.3957	58.567	84.8172	130.502	89.5066	52.8804	104.558	53.7972	82.0317	50.2836	86.7133	51.0547	70.1385	91.6829	100.807	39.1633	60.2082	93.3733	67.3784	36.1197	73.2782	76.0378	71.348	72.3513	116.16	80.4826	52.7184	56.5079	89.1018	70.0241	91.2242	50.6783	81.4421	62.1549
tRNA-Gly-TCC-2-6	100.406	116.514	160.955	94.3795	91.8158	175.346	132.336	124.174	142.426	110.142	126.769	148.856	111.886	120.373	105.99	95.9844	106.071	132.315	114.966	100.037	77.1829	135.703	71.7295	116.336	103.081	110.362	86.5582	100.824	137.524	108.682	52.5537	116.216	106.342	93.7439	72.2395	82.8362	117.021	102.825	117.829	175.745	131.699	80.2174	131.852	139.364	115.742	116.767	79.0581	123.16	91.0077
tRNA-Asn-GTT-1-1	26.0698	32.5056	36.3899	10.1121	25.0407	48.2202	21.5431	21.2869	39.0523	26.3881	21.6195	29.597	30.4251	30.8063	28.6461	29.383	21.4745	16.9634	21.7503	44.7533	17.6418	44.4929	40.3479	24.8581	32.1815	26.2768	17.8985	31.4162	42.0213	51.9786	9.79083	77.7105	20.7496	8.78849	4.01331	41.4181	21.6515	54.5602	20.6718	113.602	36.583	26.5017	52.4716	146.98	19.6762	17.0285	56.7597	15.076	26.4259
tRNA-Leu-CAA-6-1	16.2085	18.9968	23.7934	14.8311	16.6938	17.5346	36.9311	17.7391	22.9719	21.7989	18.0982	26.9855	23.5549	22.249	21.771	11.7532	31.2357	18.6598	31.0719	18.4278	18.1819	31.145	17.9324	28.8354	16.0908	24.9629	15.2577	24.8407	19.1006	26.7768	11.9506	18.2025	12.9685	17.577	20.0665	35.0461	33.2504	27.2801	24.8061	25.2408	21.9498	14.2482	12.1088	22.0851	19.0975	23.1101	8.10852	25.8445	23.3249
tRNA-Pro-CGG-1-1	144.549	138.043	153.957	146.962	100.163	100.824	107.716	127.722	142.426	152.592	158.871	150.597	150.163	140.91	155.835	142.997	139.91	181.509	146.038	147.423	168.767	126.805	188.29	139.703	159.399	137.953	161.086	141.008	152.805	193.738	168.028	145.62	158.216	152.334	168.559	124.254	142.023	144.794	140.568	215.167	160.965	186.082	162.796	162.211	152.78	136.228	127.709	125.793	136.174
tRNA-Pro-AGG-2-1	120.739	109.759	120.367	113.93	112.683	127.126	120.026	141.913	137.832	153.739	146.751	158.866	139.367	116.95	136.928	117.532	117.134	134.011	136.716	121.097	125.473	131.254	125.527	124.29	137.274	139.267	125.289	138.085	160.445	151.21	142.975	131.618	118.013	108.391	148.492	114.696	115.474	113.317	113.695	180.598	128.041	159.865	123.779	128.703	124.423	105.82	115.546	104.575	107.996
tRNA-Lys-TTT-3-1	121.062	127.067	128.764	128.086	104.336	113.975	132.336	163.2	158.506	156.034	172.137	155.384	132.497	163.73	142.657	182.174	122.991	127.226	102.537	76.3439	135.599	133.479	170.358	160.086	140.794	164.23	144.068	127.126	133.704	143.335	125.697	150.52	141.357	102.532	88.2927	140.184	117.279	115.416	105.426	162.955	91.4575	108.001	145.306	126.418	127.317	102.171	141.899	124.357	108.131
tRNA-Lys-TTT-3-2	126.046	127.912	127.365	146.962	141.897	140.277	135.414	152.556	156.209	175.538	214.558	186.722	172.736	183.697	178.752	188.051	145.767	120.44	130.502	105.302	153.376	122.355	143.459	168.538	187.055	177.368	154.631	149.044	145.165	155.936	135.344	207.228	158.216	152.334	104.346	146.556	148.467	151.09	138.501	163.783	109.749	116.408	162.796	153.834	130.789	136.228	131.763	143.182	131.725
tRNA-Thr-TGT-2-1	63.0768	61.634	72.7799	74.1553	41.7344	48.2202	33.8535	63.8608	27.5663	30.9773	18.0982	16.1043	38.2768	31.3768	25.7815	37.2184	46.2028	54.283	59.0366	31.5906	23.3124	46.7175	35.8648	53.6935	29.6673	35.4736	31.9825	34.3386	57.3018	31.5022	30.3804	49.7067	24.6402	38.0835	60.1996	31.8601	45.6227	58.7572	47.5451	35.7358	102.432	21.2298	56.5079	63.209	54.9776	51.0856	58.7868	49.6948	40.4479
tRNA-Leu-CAA-4-1	211.248	213.186	228.137	245.387	233.713	184.114	150.802	159.652	218.233	224.872	256.896	274.208	243.401	231.047	219.429	227.228	264.202	271.415	276.54	226.399	250.991	213.566	237.604	215.768	230.802	249.629	258.794	201.648	152.805	333.923	270.688	119.716	232.136	199.206	260.865	216.648	222.958	165.779	268.733	456.741	248.764	136.64	258.322	169.065	265.05	223.803	245.283	247.038	227.856
tRNA-Glu-CTC-2-1	144.442	159.151	191.747	182.692	162.764	122.742	126.181	177.391	206.747	178.98	208.006	228.942	204.143	164.871	145.522	180.216	167.241	166.242	186.431	144.79	162.692	182.421	156.908	136.72	155.376	178.682	173.997	146.852	106.963	236.266	207.911	118.316	175.075	125.968	196.652	156.114	174.758	121.711	229.457	318.763	142.674	81.3573	201.814	125.656	173.614	164.204	184.469	178.678	149.792
tRNA-Tyr-GTA-2-1	221.934	226.695	237.934	257.521	175.285	271.787	286.216	258.991	236.611	332.719	349.598	376.056	273.826	337.728	339.17	274.241	250.536	342.662	233.039	229.032	246.49	282.53	282.435	211.294	233.316	250.943	255.567	234.526	229.207	253.592	247.938	222.63	256.777	272.443	224.745	232.579	237.393	235.029	225.322	274.413	182.915	249.771	262.358	191.15	174.192	240.832	174.333	233.717	264.259
tRNA-Ala-AGC-8-1	204.004	217.408	222.538	268.982	141.897	184.114	246.207	173.843	250.394	305.184	310.289	369.527	290.511	313.197	301.357	291.871	226.459	262.933	229.932	176.381	232.224	242.486	242.087	192.899	247.898	220.725	229.453	226.489	236.848	275.644	218.71	255.535	236.027	257.796	200.665	251.695	210.844	205.65	217.054	270.125	190.232	247.206	262.358	178.965	197.341	217.722	231.093	216.807	237.024
tRNA-Ile-TAT-2-1	191.705	238.937	230.936	311.452	229.539	214.799	200.044	262.539	190.667	248.966	285.967	334.707	230.642	334.876	338.024	266.406	299.342	359.625	251.682	281.683	283.259	177.972	251.053	237.146	281.085	245.688	270.825	241.101	313.25	288.245	295.885	275.137	308.651	240.219	276.918	245.323	279.407	291.687	308.01	227.957	245.106	295.08	286.576	310.714	263.314	272.456	233.12	314.601	308.348
tRNA-Gly-CCC-2-1	129.488	133.822	152.558	157.074	95.9892	131.51	95.4054	177.391	149.318	156.034	158.052	166.701	161.94	164.3	160.991	156.709	154.877	159.456	149.145	176.381	130.198	131.254	121.044	128.765	156.382	139.267	134.385	130.048	114.604	141.76	155.645	182.025	143.951	196.276	164.546	136.998	153.364	163.681	152.971	183.08	135.357	151.601	189.705	167.542	143.521	172.718	186.496	164.639	162.196
tRNA-Glu-TTC-1-1	130.313	98.7833	109.17	138.873	154.417	65.7548	89.2502	63.8608	91.8878	84.9008	73.703	70.0753	114.83	69.5994	49.8442	82.2723	97.6116	173.027	149.145	107.934	117.012	80.0872	94.145	58.6651	85.985	93.2825	114.14	101.555	64.9421	80.3305	143.839	44.106	77.8111	93.7439	132.439	98.7662	77.5844	83.9388	109.56	46.0052	80.4826	111.421	65.9258	38.0777	81.0197	80.2773	64.8682	69.8759	142.916
tRNA-Ala-CGC-3-1	155.415	152.819	183.349	182.018	154.417	135.893	178.5	149.008	151.615	190.453	217.506	230.683	170.773	209.939	230.314	186.092	197.826	200.169	158.467	157.953	146.895	124.58	125.527	144.177	163.422	124.815	142.601	143.199	145.165	157.511	165.868	169.423	158.216	166.981	252.838	140.184	151.045	190.961	117.829	138.881	153.649	185.939	182.978	167.542	166.669	153.257	154.062	158.497	171.094
tRNA-Gly-GCC-2-2	115.145	105.538	123.166	125.39	100.163	100.824	135.414	141.913	117.157	160.623	173.12	183.676	149.181	150.038	161.564	158.668	134.704	147.582	121.18	102.669	92.6195	84.5365	85.1788	98.4381	116.658	97.224	92.72	90.5956	106.963	108.682	128.001	114.816	107.639	105.462	128.426	86.0222	103.618	136.401	84.7543	104.988	157.307	151.458	149.342	127.179	127.317	103.387	123.655	116.3	109.749
tRNA-Arg-ACG-2-1	179.297	174.77	205.743	266.959	200.325	214.799	153.88	202.226	229.719	193.895	196.623	211.532	210.032	220.208	198.231	203.722	206.937	186.598	217.503	205.339	239.965	202.443	224.155	208.808	212.197	240.432	263.196	207.493	206.287	256.743	194.089	231.031	184.153	269.514	204.679	242.137	208.009	172.075	245.994	315.34	201.207	210.161	211.232	213.997	181.716	199.477	253.391	230.527	175.274
tRNA-Cys-GCA-6-1	12.8377	4.22151	2.79923	2.69656	0	8.76731	3.07759	10.6435	0	1.14731	2.21109	0.8705	0	4.56389	1.71876	5.8766	3.90446	1.69634	3.10719	5.2651	4.32044	4.44929	4.4831	2.48581	3.51985	5.25535	1.76051	2.92244	0	0	2.30372	1.40019	2.5937	0	0	0	1.80429	2.09847	4.13436	1.84322	0	2.4222	2.69085	2.28466	1.73614	1.21632	4.05426	1.99417	2.69652
tRNA-Cys-GCA-9-1	34.0306	10.1316	1.39961	3.3707	4.17344	17.5346	9.23278	14.1913	4.59439	5.73654	3.19379	1.741	1.96291	4.56389	1.71876	3.91773	4.55521	6.78538	3.10719	2.63255	31.7283	8.89858	22.4155	3.48013	15.0851	3.94152	31.6891	24.8407	3.82012	14.176	2.59169	2.80038	9.07796	0	4.01331	3.18601	3.60858	4.19694	2.06718	2.52032	10.9749	2.13723	5.3817	2.28466	2.89356	4.86529	6.08139	2.15371	7.01096
tRNA-Val-AAC-1-1	105.391	95.8283	103.571	144.94	150.244	122.742	166.19	109.982	130.94	112.436	117.106	142.327	114.83	114.097	111.147	101.861	119.086	130.619	105.644	97.4043	90.7743	77.8626	107.594	94.9579	107.104	115.618	88.6122	97.171	106.963	127.584	106.547	113.415	89.4828	102.532	124.412	76.4642	90.9876	88.1358	97.1574	163.82	117.066	104.012	141.27	83.7709	119.793	99.7385	141.899	112.791	127.95
tRNA-Cys-GCA-2-1	3.37079	3.79936	4.19884	0.674139	12.5203	4.38366	0	0	6.89158	4.58923	4.1765	3.482	5.88873	1.71146	2.29169	1.95887	6.50744	15.2671	12.4288	5.2651	5.71559	2.22464	4.4831	6.46311	4.02269	1.31384	4.10785	5.84487	7.64024	6.30043	6.91117	7.70104	1.29685	0	12.0399	9.55802	4.89735	8.39388	4.13436	4.66446	0	3.27709	8.07255	3.80777	1.73614	2.43265	14.1899	3.50975	4.31444
tRNA-Lys-CTT-9-1	0.824767	0.422151	0	0	0	0	6.15519	7.09564	0	2.29462	1.71974	1.30575	1.96291	0	1.71876	1.95887	2.60298	1.69634	3.10719	2.63255	3.28534	6.67393	4.4831	1.98865	4.02269	3.94152	1.76051	1.46122	0	3.15022	1.00788	0	0	0	4.01331	3.18601	2.06204	0	4.13436	1.16612	0	1.5673	0	0.761554	0	1.21632	0	0.638136	0.808957
tRNA-Val-AAC-1-2	5.73751	11.3981	20.9942	9.43795	8.34689	0	15.388	17.7391	6.89158	5.73654	4.83164	5.223	8.8331	5.70487	5.72921	3.91773	9.76116	5.08903	6.21438	7.89764	8.23585	11.1232	17.9324	9.44608	8.04538	13.1384	9.68279	8.0367	7.64024	6.30043	3.88754	10.5014	2.5937	0	0	0	6.44388	2.09847	18.6046	18.3569	21.9498	4.70191	22.8722	9.13865	13.3104	15.8122	12.1628	7.2588	7.14579
tRNA-Val-AAC-1-3	9.00072	10.5538	19.5946	10.7862	25.0407	17.5346	40.0087	17.7391	13.7832	3.44192	5.81434	5.65825	2.94437	7.41633	4.01045	7.83546	21.4745	3.39269	0	0	9.36096	11.1232	8.96619	10.9376	10.5596	21.0214	12.3235	5.84487	0	14.176	12.5265	7.70104	7.78111	5.85899	4.01331	12.744	12.1145	10.4924	6.20154	21.6672	14.6332	3.84702	6.72713	5.33088	15.0465	7.29794	22.2984	10.2899	7.68509
tRNA-Val-CAC-1-4	10.9371	10.9759	22.3938	12.1345	12.5203	8.76731	89.2502	24.8347	20.6747	12.6204	6.14191	8.26975	25.5179	5.13438	3.43753	15.6709	10.4119	16.9634	18.6431	10.5302	10.3061	8.89858	17.9324	7.45743	16.0908	11.8245	10.8565	8.0367	11.4604	12.6009	22.7493	15.4021	11.6717	11.718	4.01331	22.302	8.24817	25.1816	8.26872	20.1625	21.9498	6.69666	17.4905	16.7542	16.2039	6.08162	16.217	4.94555	7.68509
tRNA-Leu-AAG-1-3	8.03252	10.1316	9.79729	2.69656	8.34689	0	46.1639	10.6435	20.6747	2.29462	3.68515	3.482	14.7218	3.99341	5.15629	9.79433	7.15818	3.39269	9.32156	13.1627	8.7759	8.89858	13.4493	4.97162	7.54254	2.62768	6.74861	5.11427	7.64024	9.45065	13.3904	5.60076	6.48426	11.718	0	6.37201	5.15511	8.39388	8.26872	13.8053	7.3166	6.55418	5.3817	6.85398	9.25939	6.08162	6.08139	3.74905	5.52787
tRNA-Leu-AAG-2-1	94.6331	74.7207	62.9826	76.8519	79.2954	74.5221	98.483	53.2173	82.699	81.4589	49.7904	35.2553	80.4794	57.0487	48.6983	56.8071	53.361	44.105	83.8941	57.9161	84.4737	62.29	94.145	55.185	64.8659	73.5749	72.1808	48.9508	61.122	74.0301	75.735	44.8061	64.8426	73.2374	48.1597	31.8601	57.7372	54.5602	78.5528	74.18	65.8494	58.2752	47.0899	51.0241	77.5474	47.4366	93.248	59.4264	55.5484
tRNA-Val-AAC-2-1	121.313	126.645	132.963	122.019	150.244	122.742	98.483	120.626	126.346	153.739	118.498	97.4961	140.348	125.507	122.032	135.162	101.516	89.9062	80.7869	68.4462	122.548	102.334	138.976	112.856	115.149	106.421	130.571	109.591	106.963	124.434	120.514	126.717	115.42	99.6029	112.373	105.138	107.742	115.416	86.8215	165.024	91.4575	122.82	95.5252	115.756	127.895	98.5222	137.845	100.666	88.5808
tRNA-Pro-TGG-3-1	93.7725	105.538	111.969	93.7054	70.9486	140.277	110.793	95.7911	114.86	112.436	111.783	97.4961	100.108	107.251	120.314	97.9433	85.8982	67.8538	77.6797	71.0788	103.781	93.4351	98.6281	107.884	101.573	97.224	96.241	113.244	91.6829	99.2318	92.8689	124.617	106.342	114.25	76.2528	114.696	104.133	100.727	86.8215	111.684	91.4575	92.4709	92.8343	103.571	112.849	105.82	85.1395	91.0141	72.2669
tRNA-Thr-TGT-6-1	130.995	135.088	156.757	194.826	146.071	122.742	70.7846	88.6955	110.265	108.994	125.95	136.669	109.923	103.829	135.782	137.121	167.241	212.043	164.681	150.055	162.962	200.218	197.256	161.578	145.32	135.325	167.542	164.387	267.409	212.64	177.243	162.422	151.732	184.558	104.346	168.858	172.696	224.536	214.987	270.05	117.066	173.686	195.087	223.897	207.179	199.477	218.93	162.166	129.433
tRNA-Ala-TGC-3-1	103.132	98.7833	124.566	112.581	104.336	96.4404	147.724	134.817	112.563	100.963	131.601	110.118	114.83	102.688	122.605	97.9433	103.468	125.529	80.7869	118.465	125.338	95.6597	134.493	110.37	117.161	128.756	113.259	130.048	118.424	110.258	101.94	105.014	105.045	87.8849	112.373	105.138	109.288	109.12	107.493	74.7443	109.749	106.149	99.5615	92.9096	97.2236	107.036	115.546	110.557	95.457
tRNA-Lys-CTT-2-2	73.6553	70.0771	83.9768	40.4484	62.6017	56.9875	67.707	92.2433	64.3214	59.66	59.0443	43.0898	52.9986	62.7535	53.2817	62.6837	45.5521	28.8379	55.9294	52.651	59.9012	86.7611	76.2126	66.6197	59.8375	78.8303	64.2585	66.4854	64.9421	42.5279	37.7235	48.3066	41.4992	43.9425	48.1597	86.0222	61.088	54.5602	39.2764	43.861	62.1911	24.3644	53.817	41.1239	57.8712	43.7876	56.7597	50.333	35.5941
tRNA-Val-AAC-1-4	76.1296	91.6068	103.571	85.6157	116.856	78.9058	73.8622	74.5042	98.7794	73.4277	49.7086	76.604	101.09	61.0421	55.0005	68.5603	63.7729	76.3355	105.644	105.302	86.2289	86.7611	103.111	89.9863	71.4027	86.7133	89.7858	92.0568	72.5823	99.2318	87.6855	91.0123	79.1079	67.3784	100.333	76.4642	68.8207	75.5449	80.62	130.304	84.1409	77.3678	92.8343	59.4012	94.9088	70.5467	119.601	73.3059	61.8852
tRNA-Lys-CTT-2-3	74.9104	78.0979	60.1834	70.1105	121.03	96.4404	61.5519	46.1217	66.6186	63.1019	83.1206	91.4025	60.8503	101.547	74.4798	70.5191	76.137	84.8172	62.1438	86.8741	72.3674	62.29	89.6619	86.5062	89.002	81.458	72.4742	78.9058	53.4817	118.133	55.1454	94.5128	57.0615	52.7309	48.1597	35.0461	63.6656	33.5755	51.6795	141.664	91.4575	61.1248	119.743	51.7857	59.0286	88.7916	109.465	79.4479	63.5031
tRNA-Val-CAC-1-5	174.241	183.636	193.147	213.028	246.233	162.195	141.569	127.722	174.587	146.855	170.254	188.463	176.662	203.664	190.783	168.462	165.289	171.331	186.431	200.074	184.564	155.725	201.739	204.831	204.654	182.624	182.212	174.616	145.165	218.94	158.525	207.228	168.591	123.039	140.466	149.742	176.305	151.09	140.568	306.312	171.94	192.351	258.322	133.272	186.924	187.314	208.794	183.863	152.219
tRNA-Gln-CTG-1-1	1.07578	2.53291	1.39961	1.34828	0	0	3.07759	0	2.29719	0	1.96541	1.30575	1.96291	1.71146	1.14584	1.95887	0.650744	5.08903	3.10719	0	2.65527	6.67393	4.4831	1.98865	5.02836	2.62768	2.93418	0	3.82012	3.15022	1.15186	0.700095	1.29685	2.9295	8.02661	0	1.80429	4.19694	6.20154	1.95607	0	1.85227	4.03628	0.761554	0	1.21632	0	1.59534	0.674131
tRNA-iMet-CAT-1-2	59.7777	65.4334	61.583	76.8519	66.7751	87.6731	52.3191	88.6955	52.8355	48.1869	68.7894	64.417	60.8503	63.324	57.8651	62.6837	55.3132	81.4245	55.9294	36.8557	54.5456	57.8408	49.3141	63.6367	69.8942	44.6705	54.5757	51.8733	64.9421	70.8798	58.745	72.1098	55.7646	87.8849	60.1996	60.5341	52.0666	98.6281	45.4779	73.7286	109.749	58.8451	91.4889	96.7173	56.1351	64.4651	40.5426	65.4887	51.3688
tRNA-Arg-TCG-4-1	4.1597	3.79936	2.79923	0.674139	8.34689	4.38366	9.23278	7.09564	6.89158	0	1.80163	1.30575	1.96291	2.28195	1.71876	3.91773	1.30149	0	6.21438	2.63255	2.16022	0	4.4831	2.48581	3.01702	0	1.17367	2.19183	0	6.30043	3.88754	2.10028	2.5937	0	8.02661	3.18601	4.12409	4.19694	2.06718	3.19741	0	1.13986	0	0.761554	0.578712	4.86529	4.05426	3.74905	1.07861
tRNA-Ser-GCT-6-1	51.3507	47.2809	65.7818	35.0552	29.2141	13.151	43.0863	14.1913	29.8635	36.7139	23.6668	32.2085	49.0728	15.9736	24.6356	52.8894	23.4268	16.9634	21.7503	26.3255	23.3574	48.9422	40.3479	43.2531	27.656	26.2768	22.2998	36.5305	61.122	17.3262	45.3546	51.807	49.2804	58.5899	16.0532	66.9061	49.2313	88.1358	41.3436	26.5574	40.2413	22.6547	44.399	70.063	57.8712	43.7876	42.5697	51.5295	31.2797
tRNA-Gln-TTG-3-1	37.258	27.4398	16.7954	14.1569	20.8672	21.9183	36.9311	21.2869	6.89158	17.2096	9.99085	9.5755	18.6477	11.4097	12.0314	19.5887	18.2208	8.48172	21.7503	28.958	13.9964	17.7972	4.4831	13.4234	18.6049	19.7076	10.563	13.151	30.561	15.7511	26.0609	17.5024	22.0465	17.577	16.0532	9.55802	19.5894	25.1816	24.8061	24.6389	21.9498	12.111	10.7634	16.7542	12.7317	8.51426	20.2713	16.6713	19.9543
tRNA-Gln-TTG-3-2	75.5917	62.4783	41.9884	38.4259	50.0813	70.1385	33.8535	42.5738	32.1607	45.8923	25.059	33.5143	39.2582	33.6587	28.0732	54.8482	48.8058	20.3561	21.7503	55.2835	42.5744	64.5147	44.831	29.3326	44.7524	30.2183	37.5575	34.3386	34.3811	55.1288	64.3603	51.807	46.6867	55.6604	68.2262	57.3481	44.8494	60.8556	26.8733	45.9299	32.9247	26.5017	28.2539	41.1239	24.8846	32.8407	32.4341	39.724	59.4584
tRNA-Ser-TGA-3-1	86.0268	75.1429	55.9845	57.3018	91.8158	74.5221	70.7846	56.7651	68.9158	74.575	50.6094	47.4423	70.6648	55.9077	58.438	54.8482	67.6774	45.8013	49.715	100.037	68.407	64.5147	80.6957	48.2247	66.3744	42.0428	60.7375	48.9508	34.3811	39.3777	84.8059	65.1088	68.7331	79.0964	100.333	89.2082	55.9329	67.1511	39.2764	52.2119	58.5328	48.8714	41.7082	38.0777	37.0376	41.355	32.4341	63.9731	73.7499
tRNA-iMet-CAT-1-3	98.6494	84.4302	72.7799	69.4363	87.6423	78.9058	76.9398	63.8608	62.0242	88.3427	62.9751	54.4063	76.5536	74.1633	73.9069	76.3957	76.137	69.5501	96.3228	100.037	82.8085	73.4133	89.6619	78.0544	82.4651	60.4366	81.5701	64.2936	84.0427	61.4292	89.2693	88.212	75.2174	70.3079	80.2661	82.8362	69.5939	94.4312	64.0825	75.4966	73.166	76.9403	61.8896	70.063	48.6118	71.7631	77.031	76.018	69.031
tRNA-Trp-CCA-3-1	3.33493	3.37721	2.79923	2.02242	4.17344	0	9.23278	7.09564	4.59439	3.44192	2.0473	1.30575	2.94437	0.570487	4.01045	7.83546	7.80893	3.39269	9.32156	5.2651	5.17553	8.89858	13.4493	0.497162	4.52553	1.31384	3.81443	0.730609	0	6.30043	4.60745	1.40019	3.89055	11.718	12.0399	3.18601	3.09306	6.29541	6.20154	4.66446	0	3.13461	1.34543	7.61554	4.05098	2.43265	10.1357	4.14788	4.31444
tRNA-Arg-TCG-2-1	61.4272	58.2568	48.9865	12.8086	12.5203	39.4529	55.3967	46.1217	22.9719	28.6827	20.473	19.151	26.4993	14.2622	20.0523	33.3007	34.4894	22.0525	24.8575	31.5906	26.8678	77.8626	44.831	77.5573	40.7297	47.2982	20.8327	39.4529	30.561	33.0773	44.0587	26.6036	40.2024	32.2245	36.1197	47.7901	45.6227	52.4618	37.2092	41.4535	51.2162	24.7919	40.3628	48.7394	36.4589	46.2203	42.5697	51.9283	34.7852
tRNA-Ser-AGA-2-1	37.6524	28.7063	26.5926	12.8086	45.9079	13.151	126.181	78.052	98.7794	75.7223	33.8215	37.8668	61.8317	20.5375	37.8128	19.5887	44.2506	27.1415	37.2863	23.6929	14.1765	22.2464	17.9324	21.378	12.5709	14.4522	17.0182	8.76731	7.64024	15.7511	22.7493	11.2015	11.6717	11.718	8.02661	19.116	15.9808	8.39388	8.26872	18.5826	40.2413	6.98162	10.7634	9.9002	17.3614	14.5959	26.3527	23.9301	12.6737
tRNA-Arg-ACG-1-1	31.4129	29.5506	22.3938	10.7862	54.2548	8.76731	129.259	42.5738	64.3214	69.9858	30.7096	39.1725	46.1284	15.9736	26.3544	19.5887	38.3939	28.8379	27.9647	21.0604	12.8713	44.4929	17.9324	14.9149	16.0908	23.6491	16.7248	10.2285	11.4604	22.0515	27.0688	10.5014	12.9685	17.577	8.02661	19.116	14.4343	10.4924	14.4703	22.2691	40.2413	5.5568	12.1088	10.6618	17.9401	13.3796	40.5426	23.3717	17.6622
tRNA-iMet-CAT-1-4	11.9412	7.17657	6.99807	6.74139	8.34689	4.38366	21.5431	21.2869	16.0804	21.7989	6.22381	6.52875	14.7218	10.2688	9.16674	9.79433	18.8716	3.39269	24.8575	13.1627	10.3511	4.44929	17.9324	9.44608	10.0567	5.25535	7.33544	5.84487	3.82012	22.0515	21.7414	14.702	7.78111	2.9295	4.01331	19.116	7.99042	20.9847	8.26872	12.6392	25.6081	10.5437	10.7634	8.37709	5.78712	10.9469	26.3527	10.7685	13.8871
tRNA-Trp-CCA-3-2	11.6185	7.59872	8.39768	2.69656	25.0407	13.151	12.3104	7.09564	20.6747	10.3258	2.94812	5.223	9.81456	3.42292	8.59382	5.8766	22.1253	15.2671	18.6431	18.4278	10.126	2.22464	4.4831	5.96594	11.0624	9.19687	9.9762	5.11427	3.82012	15.7511	20.1576	9.80133	5.18741	11.718	12.0399	15.93	6.18613	8.39388	6.20154	9.62986	14.6332	5.5568	14.7997	6.09243	2.31485	2.43265	8.10852	7.0195	10.112
tRNA-Leu-CAG-1-7	63.4712	71.7657	92.3745	86.964	70.9486	83.2895	40.0087	49.6695	75.8074	51.6289	56.0142	48.3128	42.2026	76.4452	59.0109	86.1901	76.137	106.87	87.0013	71.0788	80.7833	64.5147	107.594	80.5402	77.4368	85.3995	82.4504	86.9425	57.3018	89.7811	68.9678	79.8108	73.9205	87.8849	80.2661	66.9061	75.2646	86.0373	66.1497	108.035	32.9247	80.5024	104.943	134.033	88.5429	74.1957	81.0852	85.0316	69.84
tRNA-Thr-AGT-2-1	87.2102	81.4751	82.5772	83.5933	54.2548	78.9058	86.1726	67.4086	101.077	79.1642	88.9349	83.568	71.6463	71.8813	88.8028	78.3546	71.5818	84.8172	114.966	89.5066	76.7779	77.8626	40.3479	92.4721	77.4368	74.8888	83.6241	72.3303	106.963	63.0043	60.7607	74.9102	66.1394	102.532	32.1064	82.8362	72.687	54.5602	55.8138	50.9706	54.8745	61.2673	82.0709	54.0703	67.7093	65.6814	81.0852	79.6872	58.1101
tRNA-Arg-ACG-1-2	169.436	166.75	180.55	201.568	166.938	179.73	184.656	138.365	160.804	201.926	194.084	222.848	190.402	207.657	189.064	195.887	157.48	198.472	186.431	218.501	161.387	202.443	134.493	154.12	190.575	179.996	166.661	164.387	221.567	184.288	192.649	203.028	213.98	216.783	156.519	162.486	171.15	199.355	165.374	227.505	171.94	177.248	201.814	166.019	173.614	172.718	168.252	174.45	186.195
tRNA-Val-CAC-1-6	152.474	173.082	188.948	183.366	212.846	144.661	163.112	184.487	137.832	193.895	216.605	223.283	169.792	193.965	214.846	205.681	153.576	179.812	133.609	189.543	149.325	215.791	147.942	192.899	205.157	182.624	145.535	147.583	183.366	206.339	174.219	219.83	215.277	231.43	176.585	127.44	202.853	186.764	169.509	208.208	179.257	172.403	221.995	199.527	145.835	167.853	162.17	205.958	162.735
tRNA-Ala-CGC-1-1	105.499	88.6517	107.77	77.526	83.4689	118.359	52.3191	85.1477	82.699	96.3739	80.8276	78.345	93.2383	100.406	103.699	88.1489	88.5012	94.9953	68.3581	107.934	104.501	97.8844	94.145	95.9523	98.5559	85.3995	106.511	76.714	80.2226	107.107	79.7665	90.3123	80.4048	99.6029	52.173	92.3942	84.8015	81.8404	80.62	117.364	87.7992	86.2017	100.907	66.2552	82.7558	96.0895	79.0581	77.0549	78.1992
tRNA-Ile-AAT-5-1	91.1906	98.7833	99.3725	55.2794	70.9486	70.1385	49.2415	81.5999	62.0242	71.1331	38.5712	47.007	76.5536	82.1501	68.7506	70.5191	78.0893	62.7647	59.0366	97.4043	88.4341	86.7611	58.2803	96.4494	93.0247	93.2825	84.7977	94.2486	103.143	102.382	92.437	88.212	75.2174	87.8849	40.1331	82.8362	70.3672	102.825	74.4184	107.696	80.4826	81.7847	96.8706	75.3938	94.33	77.8447	62.841	73.3059	74.5589
tRNA-Pro-AGG-2-2	44.0354	35.0385	30.7915	20.2242	45.9079	48.2202	21.5431	56.7651	11.486	26.3881	18.1801	17.8453	19.6291	34.2292	25.2085	39.1773	28.6327	18.6598	21.7503	34.2231	23.0874	24.4711	26.8986	44.2474	29.1645	28.9044	20.8327	39.4529	64.9421	36.2275	28.9405	40.6055	31.1244	32.2245	28.0931	28.6741	27.8376	41.9694	43.4108	35.3973	29.2664	27.2141	56.5079	44.9317	24.3059	30.4081	32.4341	30.2317	34.3807
tRNA-Lys-CTT-2-4	37.9752	26.1734	20.9942	26.2914	37.561	13.151	18.4656	28.3826	13.7832	20.6515	15.1501	16.5395	19.6291	13.6917	17.7606	15.6709	22.776	10.1781	24.8575	31.5906	20.3871	24.4711	31.3817	33.807	15.5879	22.3353	19.3656	18.2652	3.82012	22.0515	10.9427	15.4021	23.3433	23.436	8.02661	31.8601	20.1049	12.5908	26.8733	22.0434	36.583	19.6625	26.9085	15.9926	13.3104	29.1918	42.5697	29.9924	15.9095
tRNA-Tyr-GTA-1-1	87.2819	78.5201	72.7799	71.4588	79.2954	83.2895	86.1726	70.9564	98.7794	79.1642	86.8876	75.2983	79.4979	50.2028	65.886	56.8071	72.2326	67.8538	87.0013	63.1812	73.4476	53.3915	53.7972	59.6594	66.8772	52.5535	72.1808	70.8691	72.5823	75.6052	61.1927	86.1117	85.5922	76.1669	80.2661	63.7201	72.1715	71.348	111.628	59.171	73.166	75.658	80.7255	65.4936	59.0286	65.6814	62.841	70.2747	53.1215
tRNA-Ala-AGC-11-1	75.8069	58.679	54.5849	26.9656	20.8672	39.4529	70.7846	46.1217	52.8355	35.5665	26.1236	26.115	53.9801	27.3834	33.8024	37.2184	30.585	20.3561	49.715	34.2231	41.6743	35.5943	58.2803	29.3326	27.656	39.4152	41.6653	43.1059	22.9207	31.5022	35.9957	25.9035	25.937	23.436	36.1197	47.7901	27.0643	31.4771	39.2764	34.3064	25.6081	30.0637	13.4543	47.2163	49.1905	29.1918	36.4884	38.7668	41.2568
tRNA-Tyr-GTA-8-1	2.97633	1.26645	0	1.34828	4.17344	4.38366	15.388	0	2.29719	1.14731	2.62055	1.30575	1.96291	3.99341	2.29169	5.8766	3.90446	5.08903	3.10719	0	4.23043	4.44929	4.4831	2.98297	3.51985	1.31384	2.93418	4.38366	0	4.72532	3.45559	2.80038	1.29685	0	0	0	2.57755	8.39388	2.06718	4.02498	3.6583	2.70716	2.69085	3.04622	0.578712	1.21632	14.1899	4.30742	3.101
tRNA-Tyr-GTA-3-1	13.6983	8.02087	4.19884	3.3707	16.6938	0	18.4656	10.6435	11.486	3.44192	3.43947	5.223	15.7033	5.70487	5.72921	1.95887	16.9193	3.39269	6.21438	7.89764	8.82091	11.1232	8.96619	4.97162	9.05105	13.1384	8.80253	10.2285	15.2805	4.72532	10.0788	12.6017	3.89055	2.9295	20.0665	15.93	10.3102	12.5908	6.20154	11.9621	14.6332	3.9895	12.1088	15.9926	3.47227	4.86529	34.4612	9.1732	6.47166
tRNA-Tyr-GTA-6-1	12.8377	15.1974	6.99807	6.06725	16.6938	8.76731	15.388	28.3826	22.9719	12.6204	4.34029	3.04675	8.8331	13.1212	8.59382	17.6298	9.76116	11.8744	15.5359	15.7953	8.86591	20.0218	8.96619	6.46311	9.05105	9.19687	9.68279	9.49792	7.64024	9.45065	9.79083	3.50047	6.48426	14.6475	4.01331	3.18601	11.599	6.29541	24.8061	12.3006	10.9749	5.98425	6.72713	3.04622	4.6297	12.1632	12.1628	17.3892	8.35923
tRNA-Ala-AGC-14-1	1.11164	0.422151	0	2.02242	0	0	6.15519	3.54782	6.89158	3.44192	1.14649	0.43525	1.96291	2.28195	1.14584	1.95887	0.650744	1.69634	3.10719	2.63255	3.19533	4.44929	0	0.994324	0.502836	2.62768	2.34734	1.46122	3.82012	1.57511	2.01576	1.40019	2.5937	2.9295	4.01331	0	2.3198	4.19694	2.06718	1.05327	0	1.70979	2.69085	1.52311	1.15742	0	0	0.638136	2.96618
tRNA-Ala-AGC-12-1	0.394454	0.422151	1.39961	2.02242	0	0	0	7.09564	2.29719	3.44192	1.63784	0	2.94437	1.14097	1.14584	3.91773	1.95223	3.39269	6.21438	0	2.34024	0	4.4831	1.49149	3.01702	0	1.46709	2.19183	0	1.57511	0.719914	0	0	0	8.02661	6.37201	1.54653	2.09847	4.13436	1.54228	0	2.13723	1.34543	0	0.578712	0	0	1.27627	0.808957
tRNA-Ala-AGC-10-1	0.932346	2.11075	1.39961	2.02242	0	0	6.15519	0	4.59439	1.14731	1.14649	1.30575	0.981456	0	2.86461	0	3.90446	0	0	10.5302	5.17553	2.22464	0	0	1.50851	1.31384	1.76051	3.65305	0	4.72532	3.16762	1.40019	3.89055	2.9295	0	3.18601	2.3198	2.09847	0	1.69275	3.6583	2.99212	2.69085	1.52311	1.15742	2.43265	4.05426	1.91441	3.50548
tRNA-Met-CAT-5-1	5.55821	4.22151	0	2.02242	0	0	0	3.54782	2.29719	2.29462	1.31027	1.30575	0	2.28195	1.14584	3.91773	3.90446	0	0	5.2651	6.43566	11.1232	8.96619	0.994324	5.5312	2.62768	2.64076	2.19183	0	4.72532	1.87178	5.60076	3.89055	11.718	4.01331	6.37201	2.57755	4.19694	2.06718	2.85887	3.6583	2.70716	4.03628	4.56932	1.15742	0	0	1.59534	4.71892
tRNA-Ala-AGC-13-1	2.00813	2.11075	1.39961	1.34828	0	8.76731	0	7.09564	4.59439	0	1.14649	0	0	0	1.14584	1.95887	8.45967	1.69634	9.32156	2.63255	5.67058	4.44929	4.4831	0.497162	7.03971	9.19687	2.64076	8.76731	0	4.72532	2.15974	1.40019	2.5937	8.78849	4.01331	3.18601	1.80429	0	0	2.9341	0	1.85227	2.69085	1.52311	2.89356	2.43265	6.08139	1.51557	4.85374
tRNA-Ile-AAT-6-1	10.1124	3.79936	2.79923	1.34828	0	4.38366	3.07759	3.54782	18.3776	3.44192	1.63784	2.6115	3.92582	8.5573	6.30214	3.91773	7.15818	6.78538	3.10719	10.5302	3.01531	11.1232	0	4.97162	1.50851	2.62768	1.76051	2.19183	0	1.57511	2.73567	1.40019	5.18741	14.6475	0	3.18601	3.60858	2.09847	6.20154	2.257	7.3166	2.13723	1.34543	1.52311	4.05098	3.64897	0	3.90858	4.17961
tRNA-Met-CAT-4-2	13.0528	6.33226	2.79923	2.02242	0	0	3.07759	10.6435	0	4.58923	7.04273	3.04675	10.796	1.14097	1.71876	3.91773	18.2208	5.08903	15.5359	0	5.26554	2.22464	8.96619	1.98865	4.52553	2.62768	3.81443	4.38366	0	3.15022	3.45559	2.10028	3.89055	2.9295	8.02661	3.18601	2.06204	6.29541	8.26872	3.23503	18.2915	1.70979	2.69085	1.52311	0.578712	0	8.10852	3.19068	10.6513
tRNA-Ile-TAT-2-2	90.7603	85.2745	20.9942	76.1777	50.0813	61.3712	36.9311	88.6955	55.1327	48.1869	31.9379	24.374	53.9801	37.0816	50.99	64.6426	83.2952	93.2989	127.395	89.5066	56.9759	33.3697	13.4493	52.202	38.2156	40.729	49.881	54.0651	15.2805	37.8026	97.3324	20.3028	77.8111	67.3784	112.373	28.6741	81.7085	14.6893	84.7543	24.7141	47.5579	94.6081	16.1451	20.562	35.8801	57.1672	58.7868	68.9187	103.142
tRNA-Pro-CGG-2-1	28.58	12.2424	11.1969	1.34828	12.5203	0	9.23278	24.8347	13.7832	4.58923	1.63784	2.17625	8.8331	1.14097	5.15629	1.95887	9.76116	6.78538	18.6431	5.2651	9.22595	11.1232	0	8.45175	6.03403	2.62768	5.57494	5.84487	0	9.45065	15.6941	2.10028	12.9685	8.78849	12.0399	0	6.44388	6.29541	4.13436	6.84623	10.9749	6.12673	8.07255	3.04622	9.8381	7.29794	18.2442	8.05647	4.58409
tRNA-Ser-GCT-1-1	38.5489	22.374	11.1969	3.3707	20.8672	26.3019	12.3104	3.54782	11.486	5.73654	2.29298	1.30575	4.90728	1.71146	1.71876	5.8766	9.76116	6.78538	6.21438	18.4278	8.95592	20.0218	13.4493	3.48013	5.02836	7.88303	9.38937	6.57548	7.64024	9.45065	24.909	9.10123	7.78111	2.9295	40.1331	9.55802	8.50593	8.39388	4.13436	6.47006	3.6583	6.26921	8.07255	6.85398	9.25939	8.51426	30.407	8.6946	10.6513
tRNA-His-GTG-1-5	40.6288	33.3499	25.193	12.8086	12.5203	26.3019	24.6207	24.8347	16.0804	9.17846	7.2884	5.223	15.7033	7.98681	10.8855	21.5475	24.7283	13.5708	24.8575	31.5906	21.1972	33.3697	22.4155	23.3666	39.2212	24.9629	24.6471	35.7999	49.6616	48.8283	39.1633	73.51	16.8591	32.2245	40.1331	38.2321	29.6419	50.3633	8.26872	70.9826	32.9247	27.784	52.4716	27.4159	26.6207	26.7591	36.4884	22.4145	37.3469
tRNA-Thr-AGT-6-1	24.5279	20.6854	5.59845	12.8086	20.8672	35.0692	46.1639	46.1217	25.2691	24.0935	18.7533	19.5863	27.4808	9.69827	12.0314	19.5887	18.2208	10.1781	18.6431	23.6929	12.3763	13.3479	8.96619	14.4177	8.54822	14.4522	10.8565	10.9591	7.64024	12.6009	6.62321	7.00095	7.78111	29.295	8.02661	15.93	10.0525	12.5908	18.6046	12.7897	18.2915	7.40907	10.7634	9.13865	8.10197	15.8122	20.2713	22.4943	12.2692
tRNA-Ile-AAT-5-2	59.6343	55.3018	60.1834	49.2122	41.7344	52.6039	80.0174	74.5042	71.213	33.2719	34.3947	32.6438	47.1099	40.5046	45.8337	33.3007	52.7103	67.8538	102.537	86.8741	40.4592	40.0436	22.4155	40.7673	44.7524	40.729	34.0365	37.2611	53.4817	70.8798	64.7923	64.4087	59.6552	43.9425	56.1863	70.0922	49.489	77.6434	59.9482	96.75	62.1911	60.1275	60.5441	53.3088	56.7138	49.8692	66.8953	52.1676	64.3121
tRNA-Val-CAC-6-1	2.43844	2.95506	1.39961	1.34828	0	0	3.07759	7.09564	2.29719	0	0.573245	0.8705	0	0.570487	1.14584	0	12.3641	5.08903	6.21438	2.63255	5.08552	6.67393	4.4831	4.97162	5.02836	0	2.34734	6.57548	7.64024	1.57511	1.43983	12.6017	9.07796	5.85899	4.01331	3.18601	4.6396	10.4924	0	4.7397	21.9498	1.42482	5.3817	2.28466	1.15742	3.64897	36.4884	5.42416	14.5612
tRNA-Ser-CGA-2-1	1.07578	2.11075	0	2.02242	0	0	3.07759	3.54782	4.59439	0	0.573245	0.8705	0	0	1.14584	0	3.25372	1.69634	3.10719	0	5.22054	2.22464	0	1.49149	2.51418	1.31384	2.64076	3.65305	3.82012	1.57511	1.58381	2.80038	3.89055	0	4.01331	3.18601	5.15511	2.09847	0	3.34788	3.6583	1.99475	2.69085	1.52311	1.73614	1.21632	4.05426	2.23348	1.75274
tRNA-Arg-ACG-2-2	3.9804	4.64366	4.19884	0	0	8.76731	15.388	10.6435	6.89158	0	1.39217	0.8705	1.96291	1.14097	0	5.8766	7.15818	3.39269	6.21438	5.2651	3.96041	2.22464	4.4831	2.98297	2.01134	10.5107	1.17367	5.11427	0	3.15022	3.88754	1.40019	3.89055	8.78849	4.01331	0	2.3198	2.09847	2.06718	6.05628	10.9749	2.13723	1.34543	0.761554	1.15742	2.43265	6.08139	1.35604	2.02239
tRNA-Arg-ACG-2-3	7.74564	7.59872	6.99807	0.674139	0	0	15.388	17.7391	20.6747	8.03116	2.29298	1.741	8.8331	1.71146	1.71876	0	5.20595	5.08903	6.21438	7.89764	3.01531	2.22464	0	1.98865	3.01702	0	2.64076	5.11427	0	0	4.60745	1.40019	3.89055	5.85899	8.02661	6.37201	1.28878	6.29541	0	5.8682	3.6583	1.99475	4.03628	1.52311	3.47227	1.21632	20.2713	2.31324	5.1234
tRNA-Leu-TAA-4-1	8.74971	5.06581	0	2.02242	8.34689	0	18.4656	17.7391	16.0804	2.29462	1.63784	3.04675	3.92582	1.14097	3.43753	0	8.45967	10.1781	6.21438	0	4.72549	8.89858	13.4493	2.98297	5.5312	2.62768	2.93418	2.92244	11.4604	4.72532	11.2307	3.50047	2.5937	0	0	0	2.06204	2.09847	8.26872	7.63618	10.9749	3.70453	5.3817	2.28466	2.89356	2.43265	20.2713	2.71208	7.68509
tRNA-Val-AAC-5-1	10.0765	8.02087	5.59845	1.34828	8.34689	8.76731	3.07759	17.7391	18.3776	3.44192	2.53866	2.6115	2.94437	4.56389	1.71876	3.91773	9.76116	1.69634	12.4288	10.5302	4.63548	0	4.4831	7.45743	6.53687	7.88303	4.10785	2.92244	3.82012	11.0258	9.35888	9.10123	9.07796	14.6475	4.01331	6.37201	7.21715	0	2.06718	8.68945	3.6583	3.9895	8.07255	6.09243	4.6297	0	12.1628	8.13623	6.33683
tRNA-Ile-AAT-5-3	12.766	5.48796	0	2.69656	4.17344	4.38366	3.07759	10.6435	4.59439	1.14731	1.96541	1.30575	1.96291	2.85243	4.01045	1.95887	7.15818	3.39269	3.10719	5.2651	3.9154	2.22464	8.96619	2.98297	4.52553	9.19687	2.05392	2.92244	0	11.0258	5.9033	4.90066	2.5937	2.9295	0	3.18601	4.12409	0	4.13436	7.86188	7.3166	2.13723	5.3817	3.04622	1.15742	2.43265	16.217	5.34439	5.52787
tRNA-Ile-AAT-9-1	0.788908	1.26645	1.39961	2.02242	4.17344	0	0	3.54782	2.29719	1.14731	0.573245	1.30575	0	0.570487	1.14584	5.8766	1.95223	5.08903	0	2.63255	3.8704	2.22464	0	3.9773	1.00567	1.31384	0.586836	2.19183	3.82012	1.57511	0.719914	0.700095	2.5937	5.85899	4.01331	0	2.57755	4.19694	0	1.50467	0	0.854893	2.69085	0.761554	0	1.21632	6.08139	1.83464	1.34826
tRNA-Ile-AAT-3-1	1.3268	2.53291	0	0.674139	0	0	3.07759	3.54782	0	1.14731	0.573245	0.43525	0	0.570487	0	1.95887	3.90446	0	0	5.2651	1.84519	0	8.96619	0.497162	1.50851	3.94152	0.586836	1.46122	0	4.72532	1.43983	0.700095	2.5937	2.9295	0	6.37201	1.03102	4.19694	0	2.33223	0	0.854893	1.34543	2.28466	1.15742	2.43265	2.02713	0.717903	2.96618
tRNA-Val-CAC-2-1	28.9027	15.6196	2.79923	6.06725	16.6938	8.76731	12.3104	24.8347	20.6747	5.73654	4.83164	3.04675	8.8331	6.27535	8.0209	15.6709	16.2686	8.48172	12.4288	23.6929	4.77049	2.22464	13.4493	3.48013	6.03403	2.62768	3.81443	6.57548	3.82012	11.0258	16.2701	2.10028	10.3748	17.577	20.0665	0	8.76368	8.39388	8.26872	10.0436	21.9498	7.69403	12.1088	2.28466	3.47227	1.21632	24.3256	11.4067	16.7185
tRNA-Val-TAC-4-1	9.39518	6.75441	4.19884	1.34828	4.17344	4.38366	9.23278	21.2869	6.89158	0	1.39217	0.43525	0.981456	1.14097	1.71876	5.8766	11.0626	1.69634	3.10719	5.2651	5.04052	6.67393	4.4831	3.48013	6.03403	5.25535	4.10785	3.65305	0	3.15022	3.45559	2.10028	3.89055	8.78849	4.01331	6.37201	3.35082	2.09847	2.06718	3.49835	10.9749	2.4222	4.03628	1.52311	1.73614	1.21632	6.08139	3.19068	7.28062
tRNA-Gln-CTG-5-1	6.4547	5.06581	2.79923	1.34828	8.34689	0	0	10.6435	6.89158	1.14731	0.982706	0.8705	1.96291	3.42292	4.01045	1.95887	13.6656	15.2671	3.10719	15.7953	5.8056	2.22464	8.96619	3.48013	2.01134	7.88303	5.57494	3.65305	3.82012	7.87554	5.47135	0.700095	2.5937	0	4.01331	6.37201	4.38184	8.39388	6.20154	2.9341	3.6583	3.13461	0	1.52311	2.89356	1.21632	4.05426	4.78602	8.08957
tRNA-Ser-GCT-2-1	7.74564	5.06581	1.39961	2.69656	4.17344	0	3.07759	3.54782	4.59439	1.14731	1.31027	1.741	1.96291	1.14097	1.71876	0	10.4119	0	3.10719	2.63255	5.58057	8.89858	4.4831	1.98865	4.02269	6.56919	3.52101	3.65305	3.82012	1.57511	3.45559	3.50047	1.29685	5.85899	0	9.55802	3.86633	2.09847	6.20154	4.21306	10.9749	2.13723	4.03628	2.28466	2.89356	1.21632	4.05426	3.42998	5.1234
tRNA-iMet-CAT-1-5	27.2173	17.3082	8.39768	4.71897	58.4282	8.76731	52.3191	28.3826	36.7551	22.9462	5.48678	10.0108	30.4251	2.28195	6.30214	5.8766	16.9193	0	6.21438	10.5302	7.7858	4.44929	8.96619	6.46311	5.5312	3.94152	3.2276	5.84487	3.82012	14.176	4.60745	6.30085	5.18741	5.85899	28.0931	6.37201	5.67062	0	2.06718	6.05628	18.2915	5.69928	2.69085	4.56932	2.89356	7.29794	4.05426	8.29577	7.55027
tRNA-Lys-TTT-6-1	3.9804	2.95506	0	0.674139	4.17344	0	12.3104	3.54782	4.59439	1.14731	1.55595	0.43525	0	1.71146	2.86461	3.91773	5.20595	11.8744	9.32156	0	3.06031	6.67393	0	3.9773	4.52553	2.62768	2.05392	1.46122	3.82012	1.57511	1.00788	2.10028	5.18741	0	8.02661	0	2.3198	2.09847	4.13436	1.8056	7.3166	1.28234	0	1.52311	1.73614	1.21632	4.05426	2.47278	2.96618
tRNA-Ser-AGA-2-2	109.766	135.933	124.566	99.7726	146.071	105.208	83.095	124.174	84.9962	94.0793	93.3571	93.5788	100.108	107.251	104.845	113.614	109.325	67.8538	87.0013	155.32	86.1389	102.334	89.6619	121.308	111.127	139.267	93.6003	119.089	106.963	80.3305	99.3481	136.519	141.357	146.475	68.2262	114.696	133.775	107.022	105.426	100.211	73.166	102.16	130.506	155.357	164.933	162.987	123.655	143.421	107.726
tRNA-Asp-GTC-2-6	106.323	133.4	117.567	82.245	108.51	127.126	123.104	127.722	114.86	87.1954	98.0249	90.532	86.3681	98.6942	100.834	115.573	103.468	71.2465	80.7869	134.26	78.3081	129.029	98.6281	134.234	124.703	112.99	76.582	100.824	118.424	105.532	83.654	136.519	125.795	102.532	96.3193	117.882	139.446	115.416	86.8215	92.8755	102.432	85.6317	173.56	153.072	140.048	160.555	105.411	145.415	102.198
tRNA-Ser-AGA-2-3	23.7031	22.7962	22.3938	7.41553	20.8672	8.76731	24.6207	49.6695	16.0804	3.44192	3.19379	3.482	11.7775	15.4031	21.771	7.83546	23.4268	8.48172	9.32156	10.5302	14.1765	24.4711	26.8986	12.429	10.5596	14.4522	13.4972	13.8816	15.2805	22.0515	11.9506	8.40114	11.6717	8.78849	8.02661	19.116	14.6921	4.19694	10.3359	19.9744	7.3166	9.83127	20.1814	12.1849	19.6762	17.0285	26.3527	12.1246	10.2468
tRNA-Ser-AGA-2-4	56.9089	52.3467	50.3861	9.43795	16.6938	43.8366	18.4656	39.026	45.9439	19.5042	10.4822	12.187	15.7033	24.5309	23.4898	31.3418	42.2984	11.8744	24.8575	28.958	26.4177	44.4929	58.2803	30.824	37.7127	31.5321	27.8747	38.7223	30.561	37.8026	37.0036	45.5062	42.7961	20.5065	12.0399	38.2321	40.7253	29.3786	8.26872	30.6952	47.5579	26.3592	48.4353	19.8004	57.8712	34.057	52.7054	43.2337	28.9876
tRNA-Asp-GTC-2-7	51.028	53.191	57.3841	19.55	33.3876	61.3712	46.1639	39.026	25.2691	20.6515	15.969	16.5395	20.6106	22.8195	25.7815	37.2184	41.6476	35.6232	34.1791	34.2231	30.3331	44.4929	53.7972	39.2758	38.7184	40.729	28.7549	43.8366	19.1006	36.2275	36.2837	53.2072	35.015	5.85899	28.0931	38.2321	49.7468	37.7725	22.739	29.0777	47.5579	34.7656	67.2713	25.1313	54.3989	46.2203	46.624	48.0995	34.2459
tRNA-Ser-TGA-4-1	8.31939	7.17657	6.99807	2.69656	0	0	6.15519	7.09564	9.18878	2.29462	2.0473	1.30575	2.94437	6.84584	4.58337	1.95887	6.50744	0	9.32156	5.2651	7.33575	8.89858	4.4831	3.9773	6.03403	6.56919	6.74861	5.11427	0	1.57511	10.5107	4.90066	2.5937	0	4.01331	12.744	6.70164	0	2.06718	5.98105	0	5.69928	4.03628	0.761554	6.36583	2.43265	6.08139	3.98835	6.20201
tRNA-Gln-CTG-1-2	64.6546	59.5233	57.3841	36.4035	41.7344	61.3712	73.8622	88.6955	62.0242	68.8385	50.2818	44.3955	55.943	51.9143	49.8442	52.8894	54.0117	42.4086	55.9294	42.1208	39.6041	73.4133	67.2464	60.1566	47.7694	47.2982	41.9587	53.3345	57.3018	34.6524	47.9463	32.9045	66.1394	35.154	12.0399	63.7201	64.6966	39.8709	55.8138	18.7707	29.2664	40.0375	52.4716	43.4086	70.0241	60.8162	34.4612	63.9731	42.7399
tRNA-Ser-AGA-3-1	0.932346	1.6886	1.39961	0	0	4.38366	9.23278	0	2.29719	0	0.245677	0	0.981456	0	0	0	1.30149	3.39269	3.10719	0	2.9253	2.22464	0	2.48581	2.51418	3.94152	0.586836	1.46122	0	4.72532	0.863897	3.50047	0	2.9295	0	6.37201	0.773266	2.09847	2.06718	1.54228	0	2.13723	1.34543	0.761554	0.578712	2.43265	0	1.51557	1.61791
tRNA-Ser-AGA-1-1	1.54196	2.53291	1.39961	1.34828	0	0	3.07759	3.54782	11.486	1.14731	0.818922	0.43525	0.981456	0	0.572921	0	3.90446	1.69634	6.21438	2.63255	3.8704	4.44929	13.4493	2.48581	1.00567	3.94152	1.46709	0.730609	3.82012	6.30043	2.44771	0	2.5937	2.9295	0	6.37201	2.06204	0	0	2.29462	0	1.42482	1.34543	0.761554	0	0	2.02713	0.79767	1.75274
tRNA-Ser-TGA-2-1	3.76524	3.79936	1.39961	4.71897	0	0	6.15519	14.1913	9.18878	1.14731	0.982706	0.43525	0	2.85243	0.572921	1.95887	13.0149	10.1781	3.10719	13.1627	10.171	4.44929	0	1.49149	4.52553	5.25535	5.57494	5.84487	15.2805	7.87554	5.32736	2.80038	2.5937	5.85899	12.0399	9.55802	6.18613	4.19694	2.06718	6.3196	7.3166	6.55418	4.03628	6.85398	6.94454	7.29794	8.10852	3.74905	5.1234
tRNA-Gln-CTG-2-1	6.99259	1.6886	6.99807	2.69656	0	4.38366	6.15519	21.2869	6.89158	4.58923	2.0473	0.8705	0	3.99341	3.43753	1.95887	5.20595	0	0	7.89764	5.53557	0	0	1.49149	4.02269	1.31384	2.93418	5.11427	0	7.87554	3.3116	3.50047	3.89055	2.9295	0	3.18601	4.12409	10.4924	4.13436	9.028	0	2.27971	5.3817	0.761554	1.73614	1.21632	12.1628	3.90858	4.44927
tRNA-Ser-AGA-4-1	4.19556	1.26645	5.59845	2.69656	4.17344	4.38366	0	7.09564	6.89158	0	1.0646	0	0	0.570487	1.71876	7.83546	5.8567	6.78538	3.10719	5.2651	7.33575	4.44929	0	3.48013	3.51985	2.62768	1.76051	2.19183	7.64024	6.30043	5.32736	2.80038	1.29685	2.9295	0	3.18601	3.09306	4.19694	4.13436	10.9088	3.6583	3.41957	2.69085	3.80777	2.31485	1.21632	4.05426	2.31324	3.101
tRNA-Arg-TCT-5-1	1.07578	1.26645	0	0.674139	4.17344	0	3.07759	7.09564	0	1.14731	0.327569	0.8705	0	1.14097	1.71876	5.8766	4.55521	6.78538	0	2.63255	3.9154	0	0	1.98865	2.51418	0	1.17367	3.65305	0	3.15022	1.43983	0.700095	2.5937	0	0	0	1.28878	2.09847	2.06718	1.3542	0	0.997375	1.34543	0.761554	0.578712	0	0	1.91441	1.88757
tRNA-Asp-GTC-3-1	21.0495	7.59872	1.39961	11.4604	4.17344	13.151	15.388	21.2869	6.89158	9.17846	7.77976	5.65825	12.7589	3.42292	7.44798	13.7121	11.0626	6.78538	12.4288	2.63255	3.73538	8.89858	4.4831	5.96594	4.52553	5.25535	5.28152	6.57548	3.82012	6.30043	5.75931	4.90066	1.29685	2.9295	8.02661	3.18601	6.70164	8.39388	2.06718	8.08758	18.2915	2.70716	5.3817	1.52311	6.36583	9.73058	6.08139	10.0506	8.08957
tRNA-Lys-TTT-4-1	32.6321	16.886	4.19884	2.69656	12.5203	8.76731	12.3104	28.3826	20.6747	5.73654	1.39217	3.04675	2.94437	4.56389	3.43753	5.8766	7.15818	11.8744	3.10719	7.89764	6.57068	4.44929	8.96619	1.98865	6.03403	3.94152	4.9881	4.38366	3.82012	3.15022	3.74355	2.10028	1.29685	0	0	3.18601	5.41286	6.29541	2.06718	6.50768	14.6332	2.4222	8.07255	6.09243	0	3.64897	12.1628	4.94555	5.39305
tRNA-iMet-CAT-1-6	59.6343	29.9727	13.9961	6.06725	29.2141	21.9183	15.388	28.3826	18.3776	13.7677	3.52136	3.04675	18.6477	5.13438	9.16674	0	14.3164	15.2671	12.4288	10.5302	8.82091	11.1232	4.4831	6.96027	7.03971	7.88303	8.2157	2.92244	3.82012	7.87554	13.5344	7.70104	10.3748	14.6475	20.0665	6.37201	10.568	10.4924	0	12.7897	7.3166	4.70191	6.72713	7.61554	3.47227	6.08162	24.3256	11.8055	9.16818
tRNA-Leu-CAA-3-1	6.20369	5.48796	2.79923	2.02242	0	0	3.07759	10.6435	6.89158	2.29462	1.22838	0.8705	0	0.570487	1.71876	3.91773	3.90446	10.1781	3.10719	5.2651	5.35555	6.67393	4.4831	1.49149	2.51418	3.94152	1.76051	4.38366	3.82012	6.30043	3.3116	0.700095	1.29685	0	8.02661	6.37201	3.35082	2.09847	2.06718	3.31026	7.3166	1.70979	1.34543	3.04622	2.31485	0	0	3.58951	3.23583
tRNA-Leu-CAA-2-1	57.7696	29.5506	2.79923	2.69656	8.34689	35.0692	24.6207	24.8347	18.3776	4.58923	1.47406	2.6115	1.96291	4.56389	4.58337	1.95887	17.5701	6.78538	0	10.5302	7.15574	8.89858	4.4831	4.97162	6.03403	9.19687	4.10785	3.65305	0	4.72532	9.2149	4.20057	3.89055	2.9295	0	9.55802	7.21715	6.29541	6.20154	2.85887	3.6583	2.70716	4.03628	2.28466	4.05098	3.64897	0	10.5292	5.1234
tRNA-Thr-CGT-5-1	15.4554	7.17657	1.39961	1.34828	0	8.76731	3.07759	3.54782	9.18878	0	1.88352	0.43525	1.96291	1.71146	0.572921	5.8766	11.0626	3.39269	0	5.2651	5.35555	11.1232	4.4831	2.48581	3.01702	2.62768	3.81443	4.38366	3.82012	1.57511	3.59957	1.40019	7.78111	2.9295	4.01331	9.55802	2.57755	0	2.06718	3.19741	7.3166	1.42482	1.34543	3.04622	2.89356	2.43265	2.02713	4.14788	3.101
tRNA-Ile-TAT-2-3	25.4602	18.9968	2.79923	22.2466	87.6423	26.3019	67.707	70.9564	82.699	58.5127	36.6877	38.302	52.9986	21.6785	20.6252	23.5064	65.7251	55.9794	111.859	42.1208	22.8624	22.2464	22.4155	19.3893	12.5709	14.4522	17.8985	18.9958	3.82012	15.7511	18.7178	5.60076	24.6402	20.5065	12.0399	9.55802	11.599	6.29541	53.7466	4.9654	10.9749	8.69141	12.1088	5.33088	5.78712	8.51426	8.10852	16.432	25.617
tRNA-Val-AAC-3-1	18.4676	13.0867	1.39961	6.74139	20.8672	0	36.9311	7.09564	20.6747	14.915	3.03001	3.482	17.6662	5.13438	5.72921	1.95887	11.7134	5.08903	12.4288	7.89764	12.6463	2.22464	8.96619	2.98297	10.5596	5.25535	14.3775	5.11427	0	9.45065	13.2464	6.30085	2.5937	8.78849	16.0532	15.93	3.09306	6.29541	10.3359	6.47006	18.2915	5.5568	5.3817	1.52311	4.6297	2.43265	4.05426	4.06812	16.1791
tRNA-Ile-AAT-8-1	28.2572	26.5955	6.99807	10.1121	16.6938	8.76731	6.15519	35.4782	4.59439	10.3258	5.81434	3.91725	5.88873	10.2688	7.44798	13.7121	16.2686	18.6598	12.4288	21.0604	8.55088	8.89858	4.4831	19.8865	10.5596	9.19687	5.86836	16.804	3.82012	14.176	11.9506	5.60076	12.9685	8.78849	16.0532	12.744	15.2076	6.29541	10.3359	14.8962	18.2915	3.84702	13.4543	1.52311	10.9955	13.3796	24.3256	23.6908	14.2916
tRNA-Arg-ACG-2-4	12.5867	7.59872	5.59845	2.02242	4.17344	0	9.23278	7.09564	11.486	4.58923	3.03001	3.482	4.90728	3.42292	5.15629	7.83546	9.11041	0	9.32156	7.89764	7.65079	2.22464	0	6.96027	4.52553	2.62768	5.28152	4.38366	3.82012	6.30043	5.9033	3.50047	6.48426	2.9295	0	3.18601	5.92837	6.29541	4.13436	5.22871	14.6332	2.56468	4.03628	0.761554	4.6297	3.64897	20.2713	10.8483	4.98857
tRNA-Ser-CGA-3-1	20.7626	7.59872	4.19884	3.3707	29.2141	8.76731	12.3104	28.3826	9.18878	6.88385	3.60326	4.3525	0.981456	5.70487	7.44798	1.95887	16.2686	5.08903	12.4288	0	10.3961	13.3479	8.96619	3.9773	6.03403	3.94152	8.50912	7.30609	26.7409	6.30043	12.8145	18.9026	10.3748	17.577	8.02661	3.18601	7.21715	8.39388	6.20154	9.66748	7.3166	2.4222	13.4543	3.80777	4.6297	3.64897	26.3527	7.41833	9.97714
tRNA-Val-AAC-4-1	1.61368	3.79936	0	7.41553	0	0	6.15519	7.09564	4.59439	2.29462	3.1119	3.04675	1.96291	3.42292	4.58337	1.95887	12.3641	10.1781	3.10719	15.7953	4.50046	4.44929	0	3.48013	5.02836	2.62768	2.93418	3.65305	11.4604	7.87554	5.61533	7.00095	1.29685	5.85899	0	9.55802	4.6396	8.39388	10.3359	6.39483	3.6583	1.99475	2.69085	2.28466	4.05098	7.29794	6.08139	4.14788	5.25822
tRNA-Thr-AGT-2-2	10.5427	12.2424	5.59845	4.04484	4.17344	8.76731	9.23278	21.2869	11.486	10.3258	9.33571	8.26975	9.81456	5.70487	7.44798	1.95887	11.7134	11.8744	21.7503	21.0604	9.13594	8.89858	8.96619	4.47446	8.54822	5.25535	6.16177	10.9591	15.2805	9.45065	5.9033	7.00095	6.48426	11.718	4.01331	3.18601	6.44388	6.29541	4.13436	7.56095	14.6332	2.13723	6.72713	2.28466	5.20841	12.1632	8.10852	8.29577	8.89853
tRNA-Ile-AAT-2-1	82.3333	67.5441	27.9923	113.255	104.336	74.5221	98.483	95.7911	91.8878	92.9319	85.3316	87.9205	69.6834	42.7865	63.0214	50.9305	102.167	83.1209	87.0013	78.9764	60.5762	55.6161	49.3141	74.0771	57.8262	28.9044	57.8033	59.91	38.2012	40.9528	70.8395	74.2101	84.2953	76.1669	72.2395	41.4181	81.4507	25.1816	103.359	41.5664	87.7992	21.7998	51.1262	16.7542	55.5563	86.3589	81.0852	74.9012	50.9643
tRNA-Leu-TAA-2-1	6.66986	2.53291	1.39961	1.34828	4.17344	8.76731	9.23278	10.6435	2.29719	1.14731	2.70244	1.30575	1.96291	1.14097	0.572921	1.95887	3.90446	1.69634	0	5.2651	3.78039	2.22464	0	0.994324	5.02836	1.31384	2.64076	5.11427	0	0	3.02364	4.90066	2.5937	5.85899	0	6.37201	3.09306	2.09847	6.20154	2.59555	7.3166	2.13723	4.03628	0.761554	2.89356	2.43265	2.02713	3.27045	3.37066
tRNA-Thr-AGT-4-1	1.79297	0.844302	1.39961	0	4.17344	4.38366	3.07759	0	0	2.29462	1.55595	0.8705	0	2.85243	0	1.95887	2.60298	1.69634	3.10719	2.63255	3.15032	2.22464	4.4831	0.994324	0.502836	1.31384	2.93418	2.19183	0	1.57511	1.58381	2.10028	2.5937	0	0	0	1.54653	0	2.06718	1.61752	3.6583	0.997375	5.3817	0.761554	1.73614	2.43265	6.08139	0.79767	2.5617
tRNA-Val-AAC-1-5	82.656	82.7416	96.5733	84.9415	91.8158	74.5221	86.1726	70.9564	91.8878	63.1019	80.7457	102.284	85.3867	62.183	60.1568	95.9844	59.8684	88.2099	65.2509	86.8741	58.371	86.7611	112.077	98.4381	95.036	76.2026	56.0428	76.714	145.165	100.807	62.2006	127.417	89.4828	76.1669	76.2528	60.5341	82.9972	109.12	59.9482	87.3082	98.7741	78.3652	99.5615	114.995	117.479	107.036	70.9496	87.9032	105.299
tRNA-iMet-CAT-2-1	1.90055	4.64366	1.39961	3.3707	8.34689	0	3.07759	7.09564	0	0	0.900814	0.43525	0	0	0.572921	0	1.30149	5.08903	6.21438	2.63255	3.42035	6.67393	0	0.497162	4.02269	3.94152	3.2276	2.19183	0	1.57511	5.18338	0.700095	2.5937	5.85899	4.01331	3.18601	1.80429	2.09847	0	2.29462	3.6583	1.85227	4.03628	0	2.31485	1.21632	0	1.99417	2.15722
tRNA-Gln-CTG-6-1	46.6173	53.6132	75.5791	22.9207	16.6938	43.8366	46.1639	49.6695	45.9439	14.915	12.0381	9.14025	20.6106	30.8063	18.3335	31.3418	35.1402	40.7123	43.5006	31.5906	16.3817	62.29	26.8986	48.2247	27.656	42.0428	25.2339	53.3345	19.1006	39.3777	51.1139	9.80133	24.6402	23.436	28.0931	57.3481	56.9639	27.2801	31.0077	16.777	25.6081	18.3802	20.1814	20.562	57.2925	25.5428	32.4341	42.436	31.9538
tRNA-Gln-TTG-3-3	53.6099	41.3708	37.7896	28.988	29.2141	39.4529	21.5431	39.026	34.4579	18.3569	17.7706	16.9748	28.4622	17.1146	13.7501	29.383	27.3312	66.1574	43.5006	36.8557	28.2179	28.9204	76.2126	44.2474	41.2326	44.6705	31.1023	42.3753	38.2012	51.9786	78.9026	30.1041	55.7646	55.6604	40.1331	66.9061	51.8088	54.5602	31.0077	52.2871	43.8996	45.5943	52.4716	31.2237	66.5519	43.7876	72.9767	51.689	49.4812
tRNA-iMet-CAT-1-7	94.2386	86.5409	71.3803	95.0536	79.2954	100.824	110.793	109.982	101.077	114.731	123.903	116.212	115.812	105.54	115.157	107.738	74.8355	88.2099	96.3228	89.5066	71.7374	100.109	62.7634	93.9636	81.4595	57.8089	72.4742	72.3303	114.604	97.6567	87.3976	89.6122	85.5922	84.9554	72.2395	89.2082	86.348	115.416	93.023	119.884	128.041	89.1938	90.1435	92.9096	69.4454	102.171	103.384	90.7748	83.8619
tRNA-Gly-GCC-2-3	145.41	143.109	152.558	159.771	121.03	192.881	126.181	124.174	101.077	168.654	176.56	185.852	158.996	132.923	164.428	168.462	121.689	144.189	130.502	115.832	123.763	120.131	143.459	122.302	126.715	114.304	128.224	118.359	126.064	130.734	122.097	127.417	132.279	134.757	164.546	165.672	121.661	148.991	128.165	172.886	197.548	151.458	129.161	125.656	135.419	120.416	154.062	136.162	137.792
tRNA-Ser-GCT-5-1	35.465	16.886	4.19884	6.06725	4.17344	17.5346	36.9311	7.09564	32.1607	4.58923	4.01272	7.8345	14.7218	6.27535	7.44798	9.79433	16.2686	18.6598	9.32156	31.5906	9.09093	6.67393	8.96619	5.46878	9.55389	10.5107	9.38937	13.8816	0	14.176	21.8854	5.60076	5.18741	14.6475	16.0532	15.93	3.86633	14.6893	2.06718	21.8553	18.2915	4.84439	5.3817	9.13865	10.4168	7.29794	22.2984	3.74905	18.3364
tRNA-Thr-TGT-1-1	44.8243	24.0626	6.99807	5.39311	20.8672	17.5346	27.6983	10.6435	22.9719	17.2096	5.32299	6.964	32.388	17.1146	18.9064	3.91773	12.3641	10.1781	15.5359	39.4882	11.3412	6.67393	0	13.4234	9.05105	7.88303	11.4433	10.9591	0	7.87554	6.76719	7.00095	2.5937	14.6475	4.01331	9.55802	6.44388	2.09847	16.5374	5.79296	7.3166	8.12148	5.3817	0	3.47227	10.9469	14.1899	10.6888	12.5388
tRNA-Leu-AAG-4-1	2.43844	2.53291	0	2.69656	0	4.38366	15.388	3.54782	2.29719	2.29462	1.39217	0.8705	6.87019	0.570487	1.71876	1.95887	5.20595	11.8744	9.32156	2.63255	4.8155	0	4.4831	0.994324	2.01134	2.62768	2.34734	2.92244	0	3.15022	2.44771	1.40019	1.29685	0	8.02661	0	3.35082	0	2.06718	1.95607	0	2.56468	0	0	1.15742	2.43265	2.02713	1.99417	4.17961
tRNA-Thr-CGT-1-1	30.4447	25.3291	1.39961	2.02242	20.8672	13.151	3.07759	31.9304	6.89158	8.03116	4.58596	4.78775	20.6106	7.98681	18.3335	5.8766	13.6656	16.9634	15.5359	15.7953	7.38076	17.7972	17.9324	11.4347	16.5936	2.62768	5.57494	7.30609	15.2805	12.6009	8.20702	7.00095	9.07796	14.6475	8.02661	0	15.4653	2.09847	0	9.25369	14.6332	6.26921	5.3817	3.04622	7.52326	24.3265	12.1628	20.4204	25.0777
tRNA-Ile-TAT-3-1	10.9371	12.6645	4.19884	20.8983	12.5203	0	70.7846	31.9304	66.6186	45.8923	12.3657	30.9028	65.7575	4.56389	14.323	5.8766	20.8238	27.1415	31.0719	39.4882	11.5662	8.89858	0	5.96594	6.53687	9.19687	10.8565	21.9183	3.82012	6.30043	6.62321	8.40114	14.2654	11.718	4.01331	12.744	7.47491	8.39388	14.4703	2.67078	18.2915	2.99212	2.69085	2.28466	1.73614	8.51426	0	9.33274	9.70749
tRNA-Arg-TCG-5-1	70.3204	51.9246	8.39768	64.0432	50.0813	56.9875	58.4743	60.3129	50.5383	56.2181	24.1582	30.9028	55.943	28.5243	24.6356	23.5064	64.4236	57.6757	43.5006	110.567	38.2989	46.7175	35.8648	46.7332	40.7297	19.7076	33.1562	39.4529	11.4604	37.8026	52.6977	37.105	40.2024	11.718	68.2262	9.55802	30.4151	18.8862	26.8733	26.7454	51.2162	55.4255	24.2177	3.80777	13.3104	40.1387	34.4612	42.3563	94.5132
tRNA-Gln-TTG-2-1	87.7481	51.9246	18.195	100.447	54.2548	43.8366	80.0174	85.1477	107.968	67.6912	70.3454	73.5573	82.4423	70.7403	55.5734	33.3007	73.5341	69.5501	114.966	76.3439	44.4196	42.2682	35.8648	60.6538	32.6844	32.846	46.9468	75.2528	0	26.7768	47.0824	11.9016	41.4992	23.436	56.1863	25.4881	40.4676	23.0832	70.2841	6.80861	18.2915	37.0453	8.07255	3.80777	17.3614	42.5713	8.10852	62.2183	60.537
tRNA-Ser-GCT-4-1	47.9799	28.2841	5.59845	37.7518	45.9079	43.8366	40.0087	21.2869	36.7551	34.4192	17.2792	10.8813	22.5735	8.5573	10.3126	5.8766	10.4119	16.9634	15.5359	7.89764	11.4762	13.3479	8.96619	15.412	6.53687	5.25535	10.563	18.9958	0	11.0258	8.49499	4.20057	9.07796	2.9295	8.02661	9.55802	9.27919	2.09847	12.4031	4.70208	0	7.83652	1.34543	3.04622	4.6297	13.3796	0	9.49227	11.0557
tRNA-Ala-AGC-3-1	56.7297	31.2392	11.1969	104.492	62.6017	100.824	98.483	78.052	64.3214	61.9546	83.9395	101.413	79.4979	60.4716	77.3444	52.8894	68.3281	55.9794	90.1084	76.3439	25.4276	44.4929	40.3479	47.2304	26.1475	23.6491	28.4615	52.6039	3.82012	22.0515	22.0294	7.00095	11.6717	17.577	28.0931	19.116	16.7541	12.5908	84.7543	4.55161	3.6583	42.6022	12.1088	2.28466	3.47227	47.4366	4.05426	45.6267	45.4364
tRNA-Ala-TGC-2-1	37.7241	15.1974	4.19884	16.8535	12.5203	21.9183	36.9311	10.6435	16.0804	11.4731	11.0554	6.52875	14.7218	11.4097	7.44798	15.6709	8.45967	5.08903	12.4288	18.4278	5.62558	2.22464	4.4831	9.94324	3.51985	9.19687	3.2276	8.0367	3.82012	6.30043	3.59957	0.700095	3.89055	11.718	8.02661	0	5.67062	2.09847	8.26872	5.22871	7.3166	11.2561	2.69085	3.04622	3.47227	3.64897	12.1628	7.89693	6.33683
tRNA-Thr-CGT-3-1	55.7614	31.6613	9.79729	35.0552	37.561	39.4529	40.0087	63.8608	41.3495	33.2719	15.5595	25.2445	51.0357	35.3702	34.9482	9.79433	65.0744	44.105	43.5006	55.2835	30.2881	26.6957	40.3479	38.2815	25.6446	18.3937	29.0484	51.8733	3.82012	33.0773	7.34312	6.30085	31.1244	26.3655	16.0532	15.93	25.0023	8.39388	22.739	10.1565	10.9749	32.0585	16.1451	4.56932	16.7826	29.1918	16.217	35.8951	20.7632
tRNA-Ala-AGC-4-1	61.75	42.2151	16.7954	62.6949	75.122	70.1385	89.2502	88.6955	71.213	80.3116	88.853	62.2408	80.4794	28.5243	63.5943	48.9716	50.758	39.0159	65.2509	63.1812	24.5725	20.0218	40.3479	50.7105	28.1588	19.7076	28.4615	45.2978	0	23.6266	19.5817	11.2015	42.7961	14.6475	36.1197	19.116	39.9521	14.6893	41.3436	8.1252	32.9247	43.5995	24.2177	11.4233	26.6207	38.9223	14.1899	55.5976	42.0658
tRNA-Ala-CGC-2-1	68.7784	39.26	5.59845	43.819	33.3876	35.0692	52.3191	56.7651	94.185	61.9546	45.0407	45.7013	60.8503	20.5375	30.9378	27.4241	55.964	62.7647	83.8941	55.2835	19.892	20.0218	8.96619	17.8978	11.0624	6.56919	20.5392	21.9183	3.82012	14.176	16.702	6.30085	14.2654	14.6475	28.0931	9.55802	12.1145	6.29541	47.5451	8.68945	18.2915	22.2272	5.3817	3.80777	6.36583	17.0285	16.217	21.8562	33.7066
tRNA-Ala-AGC-5-1	5.80923	7.59872	1.39961	4.04484	0	0	15.388	7.09564	6.89158	2.29462	1.80163	3.91725	0.981456	0.570487	1.14584	0	7.15818	5.08903	6.21438	7.89764	6.34565	8.89858	4.4831	3.48013	3.51985	3.94152	5.28152	13.151	11.4604	7.87554	3.02364	1.40019	10.3748	11.718	0	3.18601	6.44388	0	4.13436	5.4168	7.3166	1.70979	0	5.33088	2.31485	2.43265	2.02713	6.14206	3.23583
tRNA-Ala-AGC-7-1	10.2558	2.53291	1.39961	2.69656	0	4.38366	0	3.54782	4.59439	1.14731	1.55595	0.8705	1.96291	1.14097	0	3.91773	1.95223	0	9.32156	2.63255	2.79029	4.44929	0	4.47446	3.01702	2.62768	0.880253	2.19183	0	1.57511	0.719914	2.10028	2.5937	11.718	8.02661	0	3.09306	0	2.06718	2.82125	7.3166	2.27971	0	2.28466	0.578712	1.21632	0	1.59534	2.02239
tRNA-Thr-AGT-3-1	6.52642	3.37721	1.39961	2.02242	0	4.38366	3.07759	7.09564	6.89158	0	0.982706	1.741	1.96291	1.14097	1.14584	1.95887	1.30149	1.69634	3.10719	2.63255	2.25023	6.67393	8.96619	2.98297	2.51418	6.56919	1.46709	1.46122	0	1.57511	1.15186	2.10028	1.29685	2.9295	0	3.18601	1.80429	0	4.13436	2.14415	0	1.42482	0	0	0.578712	2.43265	4.05426	2.23348	1.34826
tRNA-Ala-CGC-4-1	72.1492	45.5923	16.7954	12.8086	33.3876	61.3712	15.388	49.6695	32.1607	4.58923	5.97813	3.04675	16.6847	17.6851	18.9064	13.7121	13.6656	5.08903	21.7503	21.0604	13.7264	37.819	22.4155	31.8184	13.0737	7.88303	8.80253	37.9917	11.4604	17.3262	19.1497	10.5014	16.8591	2.9295	0	19.116	29.6419	6.29541	12.4031	23.0214	32.9247	12.3959	16.1451	14.4695	37.0376	41.355	34.4612	45.3077	16.8533
tRNA-Arg-CCG-1-1	5.27134	1.6886	2.79923	1.34828	0	13.151	0	0	0	0	0.0818922	1.30575	0	0.570487	1.71876	3.91773	5.20595	1.69634	3.10719	0	2.07021	0	0	0	0.502836	0	2.05392	1.46122	0	1.57511	1.58381	0	2.5937	0	0	3.18601	2.3198	2.09847	0	4.62685	7.3166	0.569928	4.03628	1.52311	1.15742	1.21632	0	1.27627	0.943783
tRNA-Lys-TTT-7-1	13.519	6.75441	1.39961	3.3707	16.6938	0	3.07759	3.54782	4.59439	1.14731	1.0646	0.43525	0.981456	0.570487	2.29169	1.95887	7.15818	6.78538	0	7.89764	5.17553	6.67393	4.4831	1.98865	3.01702	5.25535	3.52101	5.11427	3.82012	4.72532	2.59169	3.50047	2.5937	0	0	9.55802	1.80429	4.19694	2.06718	7.93711	0	2.70716	0	3.04622	1.73614	0	2.02713	4.06812	3.37066
tRNA-Ala-TGC-6-1	18.109	9.28732	1.39961	1.34828	4.17344	0	3.07759	10.6435	0	1.14731	0.73703	1.30575	1.96291	1.14097	1.71876	1.95887	7.80893	3.39269	3.10719	2.63255	5.22054	0	0	2.98297	4.02269	3.94152	3.81443	2.19183	0	0	3.3116	2.80038	2.5937	2.9295	0	0	3.09306	6.29541	2.06718	3.94975	0	2.70716	2.69085	0.761554	2.89356	1.21632	0	3.19068	5.52787
tRNA-Phe-GAA-6-1	1.82883	0.844302	2.79923	1.34828	0	0	3.07759	3.54782	4.59439	1.14731	0.818922	0.43525	0	1.71146	2.29169	1.95887	2.60298	3.39269	9.32156	7.89764	3.82539	0	4.4831	1.49149	1.50851	3.94152	2.34734	2.92244	0	1.57511	1.29585	0	3.89055	5.85899	0	0	2.57755	8.39388	0	1.73037	0	1.85227	0	1.52311	2.31485	0	0	2.39301	2.02239
tRNA-Ala-TGC-1-1	63.7222	31.2392	5.59845	6.06725	8.34689	21.9183	43.0863	46.1217	20.6747	18.3569	11.9563	10.0108	14.7218	13.1212	10.8855	13.7121	24.7283	11.8744	15.5359	7.89764	7.7858	22.2464	13.4493	11.9319	7.54254	3.94152	4.40127	13.151	0	12.6009	21.3095	7.00095	10.3748	11.718	12.0399	15.93	15.2076	8.39388	6.20154	19.4854	14.6332	7.26659	2.69085	5.33088	5.20841	9.73058	20.2713	18.9845	17.7971
tRNA-Phe-GAA-1-1	35.6084	14.3531	1.39961	6.06725	4.17344	4.38366	46.1639	35.4782	2.29719	2.29462	6.06002	4.78775	12.7589	5.13438	4.01045	3.91773	4.55521	1.69634	6.21438	2.63255	3.42035	13.3479	0	6.46311	6.53687	2.62768	3.52101	1.46122	3.82012	4.72532	5.32736	1.40019	10.3748	0	8.02661	6.37201	6.70164	2.09847	6.20154	9.51701	7.3166	3.9895	0	2.28466	1.73614	4.86529	18.2442	6.85996	7.01096
tRNA-Ala-AGC-1-1	35.3216	16.0417	8.39768	3.3707	4.17344	4.38366	12.3104	21.2869	6.89158	2.29462	2.53866	1.30575	1.96291	6.27535	7.44798	1.95887	10.4119	10.1781	15.5359	7.89764	8.14584	8.89858	8.96619	7.95459	5.02836	6.56919	6.74861	8.0367	3.82012	7.87554	11.8066	2.10028	3.89055	2.9295	12.0399	9.55802	8.24817	8.39388	2.06718	10.8712	14.6332	6.12673	4.03628	1.52311	5.78712	7.29794	10.1357	8.6946	10.6513
tRNA-Ala-TGC-7-1	15.2403	11.3981	1.39961	2.69656	8.34689	0	12.3104	7.09564	0	1.14731	1.39217	2.17625	0.981456	0.570487	0.572921	3.91773	1.95223	0	6.21438	5.2651	4.27544	2.22464	4.4831	4.97162	3.01702	2.62768	3.81443	2.19183	0	4.72532	4.1755	2.80038	2.5937	5.85899	0	0	2.06204	8.39388	4.13436	5.75535	7.3166	2.70716	2.69085	3.80777	1.15742	1.21632	2.02713	3.19068	5.79753
tRNA-Phe-GAA-3-1	21.5157	8.02087	4.19884	5.39311	16.6938	4.38366	3.07759	14.1913	9.18878	6.88385	4.01272	3.91725	8.8331	3.42292	7.44798	3.91773	14.9671	6.78538	3.10719	10.5302	5.49056	4.44929	8.96619	6.96027	4.02269	1.31384	3.81443	3.65305	3.82012	7.87554	4.46347	5.60076	5.18741	5.85899	0	0	9.27919	2.09847	4.13436	11.9245	14.6332	5.5568	1.34543	1.52311	2.89356	4.86529	14.1899	8.37553	6.74131
tRNA-Ala-AGC-6-1	9.43104	7.59872	4.19884	2.69656	0	8.76731	6.15519	7.09564	6.89158	1.14731	1.71974	0	0.981456	0.570487	1.71876	0	5.20595	8.48172	0	2.63255	5.49056	6.67393	4.4831	2.48581	3.51985	3.94152	3.2276	4.38366	0	4.72532	1.72779	4.20057	1.29685	5.85899	0	9.55802	2.83531	0	4.13436	5.6425	0	1.70979	2.69085	3.04622	1.73614	3.64897	14.1899	4.62649	2.15722
tRNA-Ala-TGC-5-1	29.6916	10.5538	1.39961	6.06725	0	13.151	15.388	21.2869	20.6747	3.44192	3.60326	3.04675	0.981456	7.41633	1.71876	3.91773	23.4268	8.48172	3.10719	10.5302	7.87581	4.44929	8.96619	4.47446	5.5312	7.88303	2.93418	4.38366	3.82012	6.30043	5.18338	3.50047	5.18741	2.9295	0	9.55802	5.41286	2.09847	2.06718	8.83991	18.2915	4.27446	8.07255	3.80777	4.05098	4.86529	10.1357	4.62649	5.52787
tRNA-Phe-GAA-4-1	0.968205	0.422151	1.39961	0.674139	0	8.76731	0	3.54782	4.59439	0	1.31027	0.43525	0	0	2.29169	0	2.60298	1.69634	3.10719	0	3.37535	2.22464	0	2.48581	1.00567	2.62768	2.93418	0.730609	3.82012	3.15022	1.58381	0.700095	0	0	0	3.18601	1.28878	0	4.13436	1.84322	3.6583	2.27971	1.34543	0.761554	0.578712	0	2.02713	1.75487	1.88757
tRNA-Ala-AGC-2-1	106.18	88.6517	69.9807	60.6725	62.6017	56.9875	101.561	120.626	117.157	100.963	123.821	115.777	117.775	71.3108	92.2404	90.1078	91.1041	83.1209	77.6797	107.934	61.4763	60.0654	71.7295	66.6197	57.8262	59.1227	55.7494	83.2895	45.8415	72.455	76.4549	84.0114	66.1394	73.2374	104.346	82.8362	64.1811	67.1511	66.1497	93.1764	69.5077	84.9193	87.4526	86.8171	89.1216	46.2203	77.031	73.4654	87.637
tRNA-Ala-AGC-2-2	68.0254	61.2119	40.5888	74.1553	58.4282	65.7548	70.7846	117.078	66.6186	84.9008	115.468	136.233	100.108	69.0289	89.3758	50.9305	56.6147	94.9953	77.6797	63.1812	59.0461	53.3915	44.831	50.7105	61.8489	35.4736	56.6296	60.6406	45.8415	69.3047	50.6819	62.3085	46.6867	49.8014	48.1597	41.4181	49.489	65.0526	72.3513	93.6654	43.8996	54.7131	51.1262	48.7394	79.2835	54.7345	56.7597	58.6287	60.1325
tRNA-Arg-CCG-1-2	54.5422	44.748	36.3899	46.5156	41.7344	13.151	49.2415	63.8608	48.2411	47.0396	39.472	34.3848	54.9615	38.7931	42.3962	50.9305	49.4565	47.4976	46.6078	39.4882	44.0595	55.6161	44.831	48.2247	36.2042	56.4951	47.5337	62.8324	26.7409	39.3777	29.0845	21.7029	28.5307	41.013	24.0798	38.2321	46.1382	31.4771	47.5451	38.1809	32.9247	28.4964	24.2177	22.0851	44.5608	35.2734	24.3256	51.2104	39.3693
tRNA-Leu-CAA-1-1	176.357	217.83	228.137	237.297	187.805	245.485	249.285	219.965	245.8	223.725	264.184	256.798	234.568	270.981	245.783	229.187	219.301	256.148	201.967	236.929	221.828	218.015	246.57	234.163	259.966	258.826	237.082	257.174	240.668	250.442	183.866	230.331	211.387	240.219	236.785	187.974	245.641	256.013	268.733	227.167	120.724	231.106	238.14	220.851	259.842	238.399	168.252	272.644	208.037
tRNA-Leu-CAA-1-2	117.942	113.559	173.552	24.269	87.6423	92.0568	132.336	117.078	112.563	114.731	74.2762	55.2768	113.849	99.8352	92.2404	94.0255	69.6296	35.6232	105.644	94.7717	62.7364	97.8844	53.7972	86.5062	62.3517	99.8517	66.019	93.518	72.5823	67.7296	76.7428	72.1098	85.5922	38.0835	56.1863	76.4642	91.2454	77.6434	53.7466	63.1207	40.2413	57.4203	47.0899	76.1554	129.053	83.9263	50.6783	57.6715	71.7275
tRNA-Gln-CTG-1-3	94.8482	94.5618	132.963	16.1793	95.9892	56.9875	104.638	117.078	91.8878	95.2266	70.7548	51.3595	110.905	90.1369	83.6465	68.5603	55.964	39.0159	80.7869	73.7113	47.8399	64.5147	62.7634	58.6651	47.7694	74.8888	51.0547	60.6406	42.0213	70.8798	82.6461	73.51	62.2489	38.0835	48.1597	82.8362	76.2956	71.348	57.881	59.7729	40.2413	64.5444	51.1262	85.294	117.479	54.7345	30.407	51.3699	59.728
tRNA-Leu-AAG-2-2	62.8258	54.8796	46.1872	13.4828	58.4282	30.6856	70.7846	53.2173	29.8635	24.0935	25.3866	14.7985	34.351	47.9209	33.8024	25.4652	50.1073	13.5708	15.5359	44.7533	42.3944	35.5943	22.4155	29.8297	30.1702	28.9044	38.7311	31.4162	42.0213	51.9786	46.6504	18.2025	28.5307	17.577	48.1597	47.7901	38.1478	54.5602	20.6718	72.1863	47.5579	50.4387	33.6356	58.6396	43.9821	31.6244	83.1124	24.9671	34.111
tRNA-Met-CAT-3-1	53.2513	48.1252	39.1892	19.55	62.6017	35.0692	52.3191	46.1217	32.1607	39.0085	32.4293	24.374	37.2953	34.7997	33.8024	35.2596	38.3939	40.7123	43.5006	36.8557	41.2692	33.3697	17.9324	48.7219	38.7184	47.2982	43.4258	43.8366	42.0213	51.9786	40.7471	33.6046	54.4678	35.154	36.1197	50.9761	40.7253	41.9694	28.9405	70.0046	32.9247	39.4675	29.5994	62.4474	50.9266	51.0856	44.5969	48.0995	40.0434
tRNA-Lys-TTT-3-3	23.2011	21.1075	9.79729	4.04484	8.34689	13.151	15.388	17.7391	11.486	10.3258	6.14191	9.5755	4.90728	4.56389	5.15629	11.7532	7.80893	3.39269	9.32156	7.89764	6.75069	6.67393	4.4831	2.48581	6.53687	11.8245	5.86836	7.30609	7.64024	6.30043	6.91117	6.30085	7.78111	5.85899	8.02661	12.744	6.70164	2.09847	2.06718	11.1721	18.2915	7.40907	6.72713	5.33088	13.3104	1.21632	18.2442	4.54672	9.84231
tRNA-Met-CAT-3-2	44.0713	25.7512	20.9942	12.1345	37.561	30.6856	43.0863	14.1913	25.2691	32.1246	15.3957	16.1043	38.2768	11.4097	11.4584	11.7532	27.3312	23.7488	15.5359	31.5906	17.5068	8.89858	31.3817	11.9319	13.0737	14.4522	14.0841	13.151	11.4604	14.176	27.6447	16.8023	15.5622	5.85899	24.0798	15.93	8.50593	16.7878	10.3359	19.3726	10.9749	27.499	10.7634	7.61554	18.5188	10.9469	12.1628	6.46113	23.5946
tRNA-Phe-GAA-1-2	96.6054	120.313	134.363	91.6829	141.897	105.208	104.638	113.53	112.563	105.552	103.757	113.6	89.3125	119.232	116.876	94.0255	108.023	105.173	74.5725	105.302	122.908	137.928	156.908	124.788	117.161	111.676	112.966	124.204	110.784	107.107	101.94	87.5119	141.357	102.532	92.306	124.254	118.052	111.219	117.829	144.147	146.332	138.493	90.1435	109.664	179.979	152.04	139.872	132.653	114.198
tRNA-Glu-CTC-1-6	120.237	131.289	174.952	95.0536	146.071	140.277	86.1726	141.913	128.643	117.025	124.64	147.115	106.979	119.802	127.761	101.861	108.674	132.315	90.1084	126.362	129.163	109.008	143.459	136.222	117.161	118.245	117.367	127.857	114.604	113.408	103.956	76.3104	118.013	87.8849	92.306	101.952	134.291	136.401	136.434	148.811	102.432	146.187	95.5252	146.98	193.868	147.175	141.899	149.244	117.703
tRNA-Leu-AAG-3-1	7.7815	11.3981	32.1911	4.04484	4.17344	21.9183	0	14.1913	9.18878	3.44192	4.66785	2.17625	2.94437	7.98681	8.0209	7.83546	6.50744	5.08903	9.32156	7.89764	12.2413	13.3479	13.4493	3.9773	7.03971	13.1384	9.9762	11.6897	19.1006	14.176	15.9821	6.30085	14.2654	0	8.02661	19.116	9.02144	6.29541	0	16.9651	10.9749	12.3959	6.72713	19.0388	17.9401	8.51426	36.4884	6.14206	8.35923
tRNA-Ile-AAT-1-1	1.90055	1.6886	1.39961	1.34828	8.34689	4.38366	18.4656	17.7391	6.89158	1.14731	1.22838	1.30575	1.96291	5.70487	7.44798	5.8766	13.6656	1.69634	15.5359	13.1627	3.46536	4.44929	0	3.9773	5.5312	1.31384	4.40127	5.11427	0	3.15022	2.01576	2.10028	2.5937	8.78849	8.02661	6.37201	1.80429	2.09847	6.20154	1.88083	3.6583	1.99475	2.69085	1.52311	3.47227	3.64897	4.05426	1.91441	2.69652
tRNA-Ala-AGC-13-2	0.717189	0.844302	1.39961	0.674139	0	0	6.15519	0	2.29719	0	1.22838	0	1.96291	0.570487	0.572921	1.95887	1.95223	0	9.32156	7.89764	3.01531	2.22464	0	0	1.00567	0	1.17367	2.19183	3.82012	0	1.87178	2.10028	2.5937	0	0	3.18601	1.28878	2.09847	0	1.69275	0	1.28234	2.69085	0.761554	0	1.21632	0	1.27627	4.04479
tRNA-Met-CAT-7-1	0.537892	0.844302	1.39961	0	0	0	6.15519	0	0	1.14731	0.900814	0.43525	0	0.570487	1.71876	1.95887	0.650744	0	3.10719	2.63255	2.02521	8.89858	4.4831	0.994324	1.00567	0	0.586836	2.19183	7.64024	1.57511	0.863897	2.10028	1.29685	2.9295	4.01331	0	0.515511	2.09847	2.06718	1.3542	0	1.13986	1.34543	0.761554	0	0	0	1.03697	0.539305
tRNA-Ala-AGC-12-3	0.394454	0	2.79923	0.674139	0	0	3.07759	3.54782	4.59439	2.29462	1.14649	0.8705	1.96291	1.71146	0	0	0.650744	3.39269	9.32156	5.2651	1.80019	0	0	2.98297	1.50851	0	0.293418	0	0	0	0.431948	0.700095	5.18741	0	4.01331	0	0.515511	0	0	1.20373	0	1.13986	4.03628	0.761554	0	0	0	0.957204	0.674131
tRNA-Ala-AGC-16-1	0.717189	0.844302	1.39961	2.02242	0	4.38366	3.07759	7.09564	2.29719	2.29462	1.14649	1.30575	2.94437	1.14097	1.71876	3.91773	2.60298	3.39269	0	2.63255	2.25023	0	0	1.49149	2.51418	5.25535	0.880253	0	0	1.57511	0.719914	1.40019	2.5937	0	4.01331	3.18601	1.28878	0	0	0.9028	3.6583	0.997375	1.34543	1.52311	0	2.43265	0	0.79767	1.34826
tRNA-Glu-CTC-1-7	130.206	124.112	152.558	136.85	108.51	109.591	144.647	141.913	140.129	126.204	131.519	151.032	125.626	145.474	138.074	150.833	178.955	122.137	118.073	126.362	123.583	102.334	134.493	123.296	148.84	123.501	135.559	121.281	164.265	133.884	143.983	165.923	105.045	137.686	116.386	146.556	121.661	151.09	121.964	190.077	139.015	123.532	200.468	138.603	112.849	144.742	162.17	127.228	151.545
tRNA-Leu-TAA-1-1	163.555	200.522	202.944	246.735	175.285	179.73	141.569	163.2	163.101	122.762	125.623	143.633	124.645	189.402	163.283	180.216	262.901	266.326	214.396	157.953	189.154	180.196	219.672	208.808	185.044	174.741	187.787	190.689	213.927	196.888	204.312	175.724	211.387	216.783	208.692	207.09	189.966	230.832	163.307	196.284	193.89	207.881	236.795	232.274	181.716	227.452	186.496	226.618	211.947
tRNA-Gln-TTG-4-1	1.86469	0	0	1.34828	8.34689	8.76731	3.07759	3.54782	0	3.44192	2.1292	1.741	0.981456	2.28195	0.572921	3.91773	1.30149	1.69634	3.10719	2.63255	3.60037	6.67393	4.4831	1.49149	1.50851	3.94152	1.76051	2.19183	0	7.87554	1.72779	3.50047	0	5.85899	0	3.18601	1.28878	6.29541	0	1.65513	0	1.5673	2.69085	2.28466	0.578712	0	2.02713	1.1965	0.943783
tRNA-Trp-CCA-5-1	5.45064	7.17657	6.99807	4.04484	4.17344	0	18.4656	10.6435	2.29719	5.73654	4.74975	4.78775	4.90728	2.85243	5.15629	11.7532	3.90446	6.78538	6.21438	21.0604	8.86591	4.44929	17.9324	7.45743	12.0681	28.9044	7.62886	14.6122	7.64024	7.87554	10.6547	9.10123	10.3748	2.9295	0	22.302	8.50593	8.39388	0	6.39483	7.3166	9.83127	4.03628	6.85398	6.94454	4.86529	8.10852	8.216	8.62888
tRNA-Pro-AGG-2-3	31.0184	35.8828	15.3957	11.4604	12.5203	13.151	9.23278	10.6435	9.18878	3.44192	3.03001	6.52875	5.88873	7.98681	5.72921	11.7532	7.80893	13.5708	27.9647	21.0604	61.5663	55.6161	62.7634	66.1225	39.2212	26.2768	67.7795	40.1835	3.82012	53.5537	14.8302	4.20057	66.1394	35.154	16.0532	22.302	65.7276	8.39388	31.0077	20.4635	7.3166	12.5384	6.72713	3.80777	15.6252	98.5222	24.3256	53.9225	18.7408
tRNA-Arg-CCT-4-1	198.088	224.584	229.537	289.206	221.193	249.868	230.819	290.921	280.258	276.501	317.087	389.114	259.104	345.144	301.93	282.077	284.375	334.18	229.932	268.52	259.317	278.081	295.884	280.399	320.81	244.374	280.507	251.33	244.488	299.27	319.354	311.542	280.12	237.289	288.958	258.067	296.419	323.164	281.136	345.358	303.639	332.981	360.574	319.853	273.731	251.779	320.287	319.148	320.212
tRNA-Cys-GCA-1-1	20.2964	15.6196	9.79729	6.06725	8.34689	8.76731	6.15519	3.54782	4.59439	4.58923	3.76704	4.3525	5.88873	2.28195	2.86461	7.83546	9.11041	11.8744	3.10719	2.63255	7.96582	20.0218	8.96619	4.47446	6.03403	7.88303	8.50912	12.4204	3.82012	15.7511	9.35888	5.60076	7.78111	8.78849	0	0	6.95939	14.6893	10.3359	6.20675	7.3166	10.2587	13.4543	6.09243	6.94454	7.29794	12.1628	10.1304	7.14579
tRNA-Cys-GCA-9-2	3.11977	1.6886	1.39961	3.3707	4.17344	4.38366	0	3.54782	4.59439	1.14731	1.31027	0.8705	0.981456	1.14097	1.14584	1.95887	5.20595	1.69634	9.32156	7.89764	5.40056	2.22464	0	1.49149	3.51985	3.94152	4.10785	3.65305	3.82012	9.45065	31.2443	6.30085	5.18741	0	4.01331	3.18601	3.60858	2.09847	0	4.32591	3.6583	13.9632	1.34543	2.28466	2.31485	2.43265	0	2.47278	2.29205
tRNA-Cys-GCA-13-1	2.18743	3.37721	2.79923	1.34828	4.17344	0	0	10.6435	2.29719	1.14731	2.70244	0.8705	2.94437	5.70487	2.29169	3.91773	3.25372	5.08903	3.10719	0	5.40056	2.22464	0	3.9773	2.51418	5.25535	6.16177	2.92244	3.82012	9.45065	7.63109	4.20057	7.78111	8.78849	12.0399	3.18601	3.09306	0	2.06718	4.36353	0	3.13461	9.41798	6.09243	2.89356	0	2.02713	1.99417	3.77513
tRNA-Cys-GCA-18-1	0.788908	0.422151	1.39961	0.674139	4.17344	0	0	3.54782	4.59439	0	1.0646	3.482	6.87019	0	1.14584	0	3.25372	1.69634	6.21438	2.63255	4.09542	2.22464	0	2.48581	2.01134	2.62768	2.64076	2.92244	3.82012	1.57511	1.87178	0.700095	0	2.9295	8.02661	0	1.54653	2.09847	2.06718	2.67078	0	0.712411	0	1.52311	1.15742	1.21632	2.02713	0.717903	1.48309
tRNA-Cys-GCA-10-1	0.860627	0	1.39961	0.674139	0	0	3.07759	3.54782	6.89158	0	0.982706	0	1.96291	0.570487	0.572921	1.95887	1.95223	1.69634	3.10719	0	3.9154	0	4.4831	2.98297	3.01702	1.31384	1.17367	0.730609	0	4.72532	1.87178	2.80038	2.5937	2.9295	0	0	0.773266	6.29541	2.06718	2.14415	3.6583	2.13723	1.34543	4.56932	1.73614	0	0	1.27627	0.674131
tRNA-Cys-GCA-11-1	36.1822	33.7721	47.5868	93.7054	79.2954	39.4529	58.4743	46.1217	84.9962	27.5354	17.6887	35.2553	35.3324	19.967	22.3439	31.3418	59.2177	57.6757	77.6797	34.2231	39.5141	35.5943	17.9324	34.8013	32.6844	30.2183	27.5813	29.2244	42.0213	28.3519	21.4534	34.3047	29.8276	32.2245	36.1197	25.4881	29.3841	27.2801	62.0154	23.2471	51.2162	24.6494	37.6719	37.3161	33.5653	23.1101	77.031	27.6791	22.9205
tRNA-Cys-GCA-16-1	3.44251	3.79936	2.79923	2.02242	8.34689	0	9.23278	10.6435	9.18878	2.29462	4.01272	2.17625	1.96291	1.14097	4.01045	5.8766	8.45967	1.69634	9.32156	7.89764	7.83081	0	22.4155	4.97162	7.54254	7.88303	4.69468	7.30609	3.82012	6.30043	4.1755	3.50047	6.48426	14.6475	0	3.18601	4.38184	6.29541	2.06718	3.49835	3.6583	4.70191	1.34543	0.761554	3.47227	6.08162	4.05426	4.14788	4.98857
tRNA-Cys-GCA-22-1	3.01219	5.48796	1.39961	2.69656	0	0	6.15519	3.54782	6.89158	1.14731	2.37487	0.43525	1.96291	1.71146	1.71876	0	5.20595	1.69634	3.10719	7.89764	8.46087	2.22464	4.4831	0.497162	7.03971	3.94152	4.40127	2.92244	3.82012	7.87554	3.59957	2.80038	1.29685	2.9295	8.02661	6.37201	4.6396	2.09847	6.20154	3.1598	0	2.84964	1.34543	3.04622	0.578712	1.21632	6.08139	2.95138	2.29205
tRNA-Cys-GCA-15-1	2.90462	2.95506	4.19884	0.674139	0	0	6.15519	7.09564	2.29719	1.14731	2.86623	2.17625	0.981456	1.71146	3.43753	1.95887	6.50744	6.78538	3.10719	7.89764	8.55088	4.44929	8.96619	1.98865	6.53687	6.56919	5.28152	8.0367	7.64024	12.6009	3.74355	8.40114	0	2.9295	0	6.37201	1.54653	4.19694	2.06718	4.0626	0	3.13461	2.69085	1.52311	2.31485	3.64897	2.02713	3.19068	2.83135
tRNA-Cys-GCA-3-1	2.68946	3.79936	0	3.3707	4.17344	4.38366	9.23278	0	0	1.14731	1.39217	2.6115	0.981456	3.42292	2.29169	1.95887	5.20595	1.69634	9.32156	5.2651	8.7759	0	4.4831	2.48581	3.01702	7.88303	6.74861	3.65305	3.82012	1.57511	3.16762	6.30085	2.5937	0	0	6.37201	3.86633	0	4.13436	2.9341	0	3.41957	4.03628	4.56932	1.15742	0	0	2.31324	3.37066
tRNA-Cys-GCA-23-1	3.22735	2.53291	4.19884	2.02242	4.17344	4.38366	6.15519	10.6435	16.0804	6.88385	3.60326	2.17625	2.94437	0.570487	4.01045	1.95887	5.20595	3.39269	3.10719	5.2651	11.0261	11.1232	4.4831	4.47446	5.02836	5.25535	6.74861	8.76731	7.64024	4.72532	1.87178	4.90066	3.89055	0	0	0	4.12409	4.19694	2.06718	3.19741	0	1.85227	2.69085	4.56932	3.47227	0	0	2.47278	3.90996
tRNA-Cys-GCA-20-1	2.51016	3.37721	2.79923	1.34828	4.17344	4.38366	0	0	6.89158	1.14731	1.63784	1.741	1.96291	2.28195	0.572921	0	3.90446	3.39269	0	2.63255	14.9415	11.1232	0	2.98297	10.0567	2.62768	16.7248	2.19183	15.2805	9.45065	2.73567	3.50047	7.78111	5.85899	12.0399	3.18601	3.86633	2.09847	0	3.46073	0	3.27709	6.72713	0.761554	2.31485	4.86529	6.08139	3.74905	2.69652
tRNA-Cys-GCA-19-1	2.22329	4.22151	1.39961	0	0	13.151	6.15519	3.54782	2.29719	1.14731	2.45677	1.741	0.981456	0.570487	2.86461	0	1.95223	1.69634	9.32156	0	6.61568	8.89858	0	0.994324	4.52553	3.94152	3.81443	2.19183	3.82012	7.87554	2.44771	0	2.5937	2.9295	4.01331	3.18601	2.83531	2.09847	8.26872	3.79928	0	3.56205	4.03628	3.04622	1.73614	1.21632	2.02713	2.55254	1.61791
tRNA-Cys-GCA-9-3	2.51016	2.95506	1.39961	1.34828	0	0	3.07759	10.6435	6.89158	1.14731	1.71974	0.8705	1.96291	0.570487	1.71876	0	2.60298	5.08903	3.10719	0	5.31055	6.67393	4.4831	2.48581	2.51418	0	3.52101	2.19183	3.82012	11.0258	1.72779	7.70104	1.29685	0	8.02661	6.37201	2.83531	0	2.06718	3.1598	0	4.70191	1.34543	4.56932	2.31485	1.21632	6.08139	1.51557	1.88757
tRNA-Cys-GCA-12-1	2.61774	2.95506	2.79923	4.04484	4.17344	4.38366	3.07759	3.54782	9.18878	2.29462	1.63784	1.741	2.94437	2.85243	0.572921	0	1.30149	3.39269	15.5359	0	6.52567	0	4.4831	3.9773	6.03403	2.62768	2.64076	1.46122	15.2805	3.15022	2.15974	3.50047	1.29685	2.9295	0	6.37201	3.86633	0	0	2.9341	0	4.55943	8.07255	1.52311	2.31485	4.86529	2.02713	2.15371	5.52787
tRNA-Cys-GCA-21-1	2.295	1.26645	4.19884	0	0	0	6.15519	14.1913	16.0804	0	2.45677	1.741	4.90728	0.570487	1.71876	3.91773	2.60298	5.08903	0	2.63255	5.40056	0	22.4155	3.48013	4.52553	5.25535	1.17367	2.19183	7.64024	4.72532	3.16762	3.50047	6.48426	2.9295	0	0	3.09306	6.29541	2.06718	2.78363	0	2.56468	2.69085	2.28466	0.578712	0	0	2.31324	2.29205
tRNA-Cys-GCA-17-1	11.5109	9.70947	4.19884	2.69656	4.17344	4.38366	6.15519	7.09564	6.89158	3.44192	2.78433	1.741	1.96291	0.570487	2.86461	0	8.45967	8.48172	0	0	8.68589	17.7972	17.9324	3.9773	5.5312	14.4522	9.9762	16.0734	0	6.30043	4.03152	3.50047	7.78111	17.577	16.0532	9.55802	5.15511	6.29541	14.4703	3.98736	3.6583	58.8451	9.41798	3.80777	6.94454	9.73058	0	12.3639	7.41544
tRNA-Cys-GCA-9-4	2.51016	2.95506	1.39961	2.02242	0	8.76731	3.07759	7.09564	2.29719	2.29462	3.52136	1.741	3.92582	1.14097	1.71876	1.95887	2.60298	3.39269	6.21438	5.2651	5.31055	6.67393	0	3.48013	4.52553	0	1.76051	4.38366	3.82012	6.30043	1.15186	1.40019	1.29685	0	4.01331	6.37201	2.83531	4.19694	6.20154	2.4827	10.9749	18.9501	9.41798	4.56932	6.36583	2.43265	4.05426	5.90276	3.90996
tRNA-Tyr-GTA-9-1	3.01219	2.95506	4.19884	3.3707	0	8.76731	6.15519	10.6435	6.89158	2.29462	2.94812	3.04675	2.94437	2.28195	2.86461	7.83546	4.55521	0	6.21438	7.89764	6.34565	0	13.4493	4.47446	8.04538	5.25535	2.64076	2.19183	0	6.30043	2.01576	6.30085	0	0	0	0	2.3198	0	8.26872	3.79928	10.9749	2.4222	1.34543	4.56932	2.31485	0	0	2.71208	1.88757
tRNA-Tyr-GTA-5-1	239.613	232.605	237.934	293.925	267.1	188.497	270.828	180.939	181.478	236.345	302.592	347.33	247.327	333.735	315.68	240.94	367.67	429.175	273.433	279.05	252.926	238.037	206.222	184.944	255.944	178.682	250.872	219.183	297.97	285.094	280.91	326.244	246.402	278.302	300.998	191.16	236.877	293.786	270.8	339.265	299.981	268.579	297.339	284.06	257.527	263.942	342.585	270.649	305.516
tRNA-Tyr-GTA-5-2	156.347	146.064	107.77	185.388	162.764	87.6731	166.19	131.269	133.237	150.297	195.067	241.564	186.477	265.276	235.471	142.997	216.698	217.132	152.252	173.748	145.77	122.355	134.493	101.421	164.427	85.3995	118.834	117.628	194.826	189.013	123.825	156.821	154.325	137.686	160.532	98.7662	137.126	153.188	159.173	171.795	182.915	155.733	161.451	173.634	122.687	149.608	212.849	176.445	179.858
tRNA-Ala-AGC-8-2	129.56	112.714	86.776	139.547	121.03	74.5221	104.638	124.174	94.185	127.351	150.19	184.111	143.293	177.421	173.022	109.696	164.638	150.975	99.43	118.465	118.902	109.008	143.459	90.4835	129.229	77.5165	105.924	108.13	168.085	173.262	112.595	121.817	132.279	117.18	108.359	79.6502	109.031	104.924	130.232	156.56	131.699	156.445	133.197	153.072	129.631	136.228	143.926	143.102	131.59
tRNA-Ser-AGA-2-5	168.898	177.726	207.143	221.118	154.417	201.648	172.345	166.748	181.478	168.654	172.874	194.122	170.773	195.106	195.939	168.462	242.727	293.468	201.967	268.52	205.761	204.667	188.29	155.612	196.609	168.171	218.89	193.611	229.207	187.438	176.091	186.225	201.012	237.289	188.625	159.3	189.45	136.401	206.718	149.15	215.84	200.045	177.596	166.019	192.132	155.689	225.011	210.027	228.935
tRNA-Met-CAT-1-1	158.104	138.043	153.957	215.05	133.55	157.812	101.561	113.53	121.751	103.258	118.252	145.374	127.589	124.937	131.199	137.121	160.083	215.436	155.359	131.627	165.077	151.276	121.044	132.245	164.93	139.267	164.314	129.318	202.466	168.537	121.378	196.727	130.982	102.532	96.3193	187.974	135.064	172.075	159.173	157.426	175.598	248.916	213.923	178.204	135.419	144.742	127.709	147.808	127.68
tRNA-His-GTG-1-6	22.6632	37.9936	19.5946	84.2674	54.2548	52.6039	52.3191	63.8608	57.4299	27.5354	27.352	47.4423	17.6662	34.2292	25.2085	37.2184	37.7431	37.3196	46.6078	36.8557	55.0857	31.145	62.7634	61.6481	44.2496	44.6705	57.5099	46.0284	11.4604	53.5537	4.60745	3.50047	42.7961	49.8014	16.0532	44.6041	42.0141	8.39388	55.8138	29.9429	25.6081	5.84177	0	5.33088	32.4079	46.2203	34.4612	108.403	20.4936
tRNA-Arg-TCG-6-1	1.72125	6.75441	6.99807	1.34828	0	13.151	3.07759	17.7391	9.18878	4.58923	2.29298	0.8705	0	1.14097	2.86461	3.91773	5.20595	6.78538	9.32156	2.63255	7.24574	4.44929	0	8.45175	6.53687	9.19687	4.10785	5.84487	0	3.15022	12.2385	3.50047	10.3748	8.78849	8.02661	6.37201	6.95939	2.09847	4.13436	3.04695	3.6583	5.84177	4.03628	0	2.31485	7.29794	2.02713	4.70625	4.58409
tRNA-Arg-TCT-3-1	31.9508	35.4607	27.9923	58.6501	41.7344	21.9183	58.4743	21.2869	55.1327	22.9462	33.6577	24.8093	39.2582	25.6719	20.0523	19.5887	54.0117	45.8013	87.0013	50.0184	64.6266	40.0436	40.3479	35.2985	64.8659	39.4152	63.6717	52.6039	49.6616	72.455	85.6698	62.3085	41.4992	55.6604	68.2262	31.8601	43.5607	44.0679	53.7466	78.2802	21.9498	98.7401	52.4716	39.6008	28.9356	29.1918	64.8682	42.436	69.1658
tRNA-Val-TAC-3-1	20.6909	10.5538	4.19884	3.3707	16.6938	8.76731	3.07759	0	2.29719	2.29462	1.96541	0.8705	0	1.71146	5.72921	5.8766	6.50744	5.08903	0	5.2651	6.25564	2.22464	13.4493	10.4404	4.02269	9.19687	3.81443	4.38366	11.4604	3.15022	1.58381	6.30085	9.07796	0	8.02661	3.18601	6.18613	20.9847	2.06718	6.50768	0	2.70716	5.3817	17.5157	1.15742	2.43265	6.08139	1.75487	2.42687
tRNA-Asn-GTT-2-3	125.508	136.355	138.562	128.761	141.897	184.114	120.026	166.748	142.426	126.204	121.856	152.773	123.663	143.192	151.251	129.285	184.811	169.634	152.252	160.585	150.991	162.399	156.908	168.041	143.308	151.091	156.685	163.656	179.546	122.858	110.723	137.219	134.873	187.488	160.532	108.324	143.054	142.696	148.837	122.931	153.649	145.047	125.125	132.51	135.997	150.824	141.899	174.929	182.959
tRNA-Ser-TGA-1-1	145.733	150.286	159.556	192.804	166.938	162.195	135.414	120.626	133.237	143.413	177.133	185.852	158.014	168.864	155.835	131.244	251.838	171.331	180.217	179.013	172.683	155.725	192.773	165.555	194.095	183.937	171.063	147.583	217.747	148.06	190.201	237.332	169.888	175.77	284.945	178.416	168.572	209.847	179.845	198.578	248.764	166.704	215.268	196.481	138.891	173.934	212.849	167.112	183.364
tRNA-Val-TAC-1-1	139.744	123.69	149.759	130.109	175.285	135.893	175.423	102.887	117.157	160.623	136.187	152.338	145.255	132.923	108.282	166.504	136.656	120.44	158.467	150.055	106.121	95.6597	125.527	127.273	121.184	156.347	103.283	113.975	38.2012	102.382	123.969	108.515	108.936	108.391	156.519	117.882	127.847	83.9388	138.501	105.101	168.282	135.358	100.907	64.7321	146.993	135.012	131.763	128.664	156.398
tRNA-Val-TAC-2-1	128.341	115.247	169.353	113.93	100.163	127.126	126.181	106.435	107.968	154.887	140.855	147.115	140.348	126.078	120.314	174.339	141.211	101.781	130.502	128.995	95.9949	104.558	125.527	135.228	112.635	149.778	92.1332	111.783	68.7622	103.957	113.746	83.3113	101.154	146.475	120.399	156.114	136.353	83.9388	97.1574	84.7879	149.99	123.674	86.1072	67.0167	155.674	147.175	113.519	128.345	128.355
tRNA-Arg-TCT-3-2	112.993	87.8074	103.571	68.7622	104.336	100.824	104.638	106.435	96.4822	99.8158	94.0941	90.0968	105.997	112.386	91.6674	139.079	107.373	55.9794	96.3228	94.7717	74.6177	102.334	98.6281	116.336	80.9566	103.793	62.7914	92.7874	80.2226	86.6309	82.6461	50.4068	89.4828	99.6029	112.373	133.812	104.391	67.1511	66.1497	69.6284	91.4575	92.1859	60.5441	56.355	109.377	131.363	101.357	98.7515	100.311
tRNA-Leu-TAA-3-1	80.0024	64.5891	60.1834	37.0777	91.8158	56.9875	113.871	92.2433	73.5102	72.2804	56.7513	43.9603	65.7575	61.0421	59.5838	70.5191	60.5192	39.0159	71.4653	50.0184	45.8597	66.7393	53.7972	88.992	51.2893	56.4951	47.2403	60.6406	30.561	53.5537	40.4592	27.3037	59.6552	58.5899	40.1331	54.1621	67.0164	48.2648	31.0077	40.8517	40.2413	47.589	29.5994	20.562	70.0241	63.2488	48.6511	73.4654	63.2335
tRNA-Lys-TTT-5-1	54.0402	57.8347	37.7896	37.0777	33.3876	52.6039	49.2415	46.1217	57.4299	74.575	71.9832	56.5825	68.7019	52.4848	62.4484	54.8482	46.8536	40.7123	77.6797	55.2835	36.2287	42.2682	35.8648	45.2417	32.1815	38.1013	28.7549	52.6039	26.7409	36.2275	35.7077	21.7029	35.015	20.5065	44.1464	60.5341	50.2623	31.4771	41.3436	29.4162	43.8996	32.6284	17.4905	18.2773	43.4034	62.0325	40.5426	44.8291	42.8747
tRNA-Phe-GAA-1-3	59.2398	44.3258	26.5926	33.0328	37.561	43.8366	76.9398	39.026	39.0523	49.3342	41.6012	30.0323	46.1284	33.6587	33.8024	25.4652	35.7909	25.4452	49.715	23.6929	35.8237	33.3697	8.96619	23.8638	29.1645	17.0799	26.701	29.2244	19.1006	44.103	45.4986	22.403	27.2339	32.2245	32.1064	15.93	29.1264	25.1816	43.4108	57.4782	65.8494	18.8076	30.9448	16.7542	31.2504	31.6244	97.3023	19.6227	27.2349
tRNA-Lys-TTT-3-4	87.1385	65.4334	65.7818	66.0656	79.2954	92.0568	123.104	35.4782	89.5906	89.49	102.447	117.953	95.2012	73.5928	75.0527	95.9844	87.1997	74.6391	158.467	89.5066	80.6483	48.9422	98.6281	59.6594	78.9453	76.2026	66.8993	71.5997	57.3018	74.0301	63.4964	84.0114	73.9205	64.4489	100.333	50.9761	66.2431	52.4618	78.5528	59.4343	80.4826	65.9692	65.9258	46.4548	61.3435	60.8162	87.1666	64.691	79.4126
tRNA-Phe-GAA-2-1	96.0675	95.4061	53.1853	46.5156	75.122	74.5221	52.3191	95.7911	66.6186	47.0396	22.6022	24.8093	41.2211	35.3702	31.5107	58.766	58.567	15.2671	77.6797	73.7113	45.7247	55.6161	58.2803	76.5629	53.3006	60.4366	49.0008	48.9508	38.2012	67.7296	64.5043	57.4078	59.6552	73.2374	28.0931	50.9761	74.7491	60.8556	51.6795	46.1932	113.407	68.2489	60.5441	61.6859	77.5474	86.3589	68.9224	69.9557	71.9972
tRNA-Ser-GCT-3-1	86.493	75.565	99.3725	105.166	104.336	92.0568	101.561	60.3129	98.7794	103.258	108.098	90.9673	105.016	88.9959	69.8964	78.3546	87.8504	100.084	111.859	81.609	80.3783	82.3118	76.2126	68.1112	73.4141	88.0272	84.5043	73.0609	68.7622	50.4034	103.092	49.0066	80.4048	76.1669	108.359	73.2782	80.1619	62.9541	121.964	28.2501	43.8996	68.5339	65.9258	51.0241	51.5054	55.9509	20.2713	67.2436	85.345
tRNA-Pro-AGG-2-4	154.267	163.372	179.15	190.107	129.377	192.881	193.888	152.556	144.723	223.725	227.087	213.273	194.328	252.155	233.752	164.545	159.432	162.849	164.681	192.176	183.169	191.319	156.908	211.791	185.044	173.427	180.745	178.269	145.165	160.661	132.032	149.12	204.903	161.122	132.439	178.416	186.357	155.287	171.576	96.4867	171.94	205.174	157.415	160.688	199.077	197.044	176.36	212.739	153.837
tRNA-Pro-TGG-2-1	150.323	146.909	144.16	151.681	100.163	175.346	153.88	163.2	105.671	167.507	174.594	161.478	150.163	215.073	189.637	160.627	148.37	135.708	124.288	157.953	163.142	177.972	152.425	177.984	154.874	143.208	164.021	180.46	110.784	141.76	108.851	107.115	132.279	161.122	84.2794	146.556	153.107	140.598	124.031	79.9354	135.357	171.263	130.506	129.464	170.72	160.555	127.709	178.359	136.849
tRNA-Lys-TTT-2-1	2.22329	1.26645	5.59845	0.674139	0	4.38366	0	7.09564	2.29719	0	2.21109	3.04675	0.981456	1.14097	2.86461	3.91773	2.60298	1.69634	3.10719	0	4.14043	4.44929	4.4831	2.98297	3.51985	1.31384	2.34734	5.11427	0	1.57511	1.29585	2.80038	7.78111	0	4.01331	9.55802	0.773266	2.09847	2.06718	2.40747	3.6583	2.27971	2.69085	1.52311	2.31485	0	4.05426	1.75487	1.21344
tRNA-Lys-TTT-11-1	2.58188	2.95506	5.59845	2.69656	0	4.38366	3.07759	0	4.59439	1.14731	2.37487	1.741	1.96291	1.71146	4.58337	1.95887	5.20595	3.39269	3.10719	2.63255	5.26554	8.89858	8.96619	2.98297	5.02836	3.94152	4.10785	2.92244	0	3.15022	5.0394	3.50047	3.89055	0	8.02661	0	2.57755	2.09847	2.06718	2.36985	0	4.13198	1.34543	4.56932	1.73614	1.21632	4.05426	2.87161	1.61791
tRNA-Ser-CGA-4-1	80.7913	78.9422	55.9845	100.447	108.51	65.7548	104.638	92.2433	119.454	87.1954	92.7838	86.6148	103.053	87.2845	93.3862	101.861	117.134	66.1574	102.537	110.567	70.3872	46.7175	31.3817	74.0771	65.3687	69.6334	53.402	58.4487	95.5031	61.4292	78.9026	60.9083	76.5142	67.3784	100.333	79.6502	68.8207	83.9388	64.0825	82.4181	76.8243	98.8826	61.8896	51.7857	72.339	82.71	121.628	74.981	106.648
tRNA-Asp-GTC-2-8	176.393	176.459	194.546	233.252	175.285	192.881	169.268	159.652	153.912	168.654	233.147	277.254	185.495	218.496	196.512	246.817	240.124	296.86	254.789	171.116	197.705	157.95	219.672	179.475	221.248	191.82	211.554	203.109	252.128	198.464	226.197	242.233	162.106	243.148	156.519	210.276	202.853	172.075	202.584	254.251	208.523	221.987	248.904	206.381	163.775	192.179	202.713	204.283	237.833
tRNA-Asp-GTC-1-1	153.084	179.414	254.73	182.018	158.591	127.126	156.957	120.626	204.45	168.654	178.607	222.413	154.089	250.444	209.116	213.516	211.492	196.776	211.289	218.501	179.523	189.095	147.942	220.243	223.259	219.411	167.542	162.195	171.905	217.365	201.288	228.231	181.559	187.488	176.585	175.23	204.4	205.65	196.382	257.674	168.282	151.458	223.341	232.274	248.846	209.208	222.984	225.262	189.566
tRNA-Trp-CCA-4-1	96.2109	88.2295	114.768	90.3347	91.8158	122.742	83.095	56.7651	64.3214	106.7	108.507	131.881	95.2012	108.963	107.136	113.614	109.976	145.886	105.644	110.567	90.0993	106.783	94.145	87.9977	106.601	94.5964	80.9833	96.4404	148.985	103.957	92.149	120.416	79.1079	67.3784	88.2927	82.8362	81.7085	125.908	78.5528	130.417	131.699	103.727	122.434	120.326	111.691	86.3589	123.655	94.9227	103.816
tRNA-Ala-TGC-3-2	65.9097	59.9454	58.7837	65.3915	45.9079	56.9875	70.7846	53.2173	43.6467	68.8385	66.5783	56.1473	51.0357	63.324	46.9796	52.8894	42.2984	35.6232	68.3581	44.7533	69.9372	46.7175	85.1788	60.6538	81.9623	55.1812	69.8334	54.0651	118.424	78.7554	59.8968	74.2101	47.9835	46.8719	40.1331	73.2782	53.3554	117.514	62.0154	54.2808	124.382	42.4597	90.1435	73.1092	45.7182	60.8162	87.1666	60.1443	67.1435
tRNA-Asp-GTC-2-9	130.995	131.289	139.961	170.557	95.9892	100.824	147.724	149.008	144.723	153.739	172.956	171.053	144.274	123.225	166.72	152.791	114.531	106.87	124.288	134.26	127.003	140.153	143.459	125.782	117.664	155.033	132.918	153.428	148.985	144.91	170.908	101.514	151.732	137.686	160.532	175.23	141.25	163.681	155.038	183.908	120.724	171.833	113.016	138.603	149.308	133.796	143.926	139.193	169.746
tRNA-Phe-GAA-1-4	154.913	163.372	176.351	184.714	141.897	131.51	184.656	177.391	142.426	157.181	180.327	186.722	145.255	148.327	163.856	162.586	132.752	145.886	130.502	160.585	156.391	140.153	183.807	146.166	158.393	193.134	159.032	168.04	179.546	179.562	212.087	153.321	197.121	152.334	200.665	181.602	171.665	190.961	144.703	234.276	135.357	195.913	164.142	185.058	168.405	149.608	184.469	147.011	204.262
tRNA-Asp-GTC-2-10	166.603	179.836	162.355	206.287	125.203	157.812	246.207	212.869	238.908	226.02	249.116	269.855	217.883	221.349	237.189	207.64	183.51	201.865	158.467	202.706	208.461	180.196	215.189	211.791	241.361	172.113	207.446	187.767	148.985	242.567	206.615	200.227	204.903	210.924	212.705	251.695	201.049	172.075	188.113	204.823	171.94	227.401	170.869	157.642	190.396	199.477	214.876	202.209	236.216
tRNA-Ala-TGC-4-1	173.524	175.615	148.359	208.983	129.377	179.73	246.207	241.252	232.017	207.663	256.65	263.326	220.828	264.135	259.533	219.393	201.08	174.723	177.11	181.646	184.159	184.645	215.189	210.3	202.14	161.602	179.278	189.228	148.985	218.94	204.168	154.721	180.262	199.206	240.798	219.834	205.947	144.794	181.912	174.616	149.99	226.832	147.997	154.595	162.618	198.261	178.387	195.589	235.407
tRNA-Asn-GTT-2-4	120.022	103.427	110.569	198.197	162.764	96.4404	67.707	92.2433	41.3495	76.8696	89.1806	98.3666	93.2383	132.923	132.918	109.696	136.656	259.541	99.43	118.465	126.643	86.7611	107.594	71.0942	98.0531	91.9687	124.116	103.016	164.265	83.4807	103.956	88.9121	82.9985	99.6029	120.399	89.2082	87.8946	117.514	101.292	108.562	157.307	155.733	189.705	150.788	126.738	76.6284	75.0038	92.2107	129.298
tRNA-Glu-TTC-1-2	149.39	149.441	152.558	250.106	175.285	175.346	104.638	184.487	172.29	184.717	201.619	235.47	157.033	217.355	217.71	195.887	257.695	305.342	223.718	200.074	159.721	166.848	170.358	153.126	148.337	169.485	167.542	162.195	198.646	192.163	175.947	137.219	156.919	114.25	216.718	187.974	157.231	146.893	206.718	211.932	201.207	187.364	193.741	178.204	174.192	159.338	184.469	172.137	190.644
tRNA-Glu-TTC-2-1	155.522	194.612	232.336	258.195	171.111	206.032	209.276	184.487	206.747	197.337	210.954	249.834	203.161	216.214	223.439	223.311	247.933	334.18	220.61	202.706	187.039	195.769	183.807	215.271	241.864	237.805	202.752	199.456	252.128	162.236	214.678	245.033	239.918	272.443	168.559	226.206	257.755	260.21	221.188	144.109	252.423	246.921	291.957	255.882	241.323	227.452	202.713	267.299	264.934
tRNA-Phe-GAA-1-5	165.742	153.663	128.764	204.264	179.458	140.277	144.647	149.008	121.751	119.32	135.45	137.974	105.997	195.106	173.022	127.326	219.951	193.383	114.966	92.1392	153.286	149.051	143.459	151.634	180.518	101.166	148.176	123.473	210.107	114.983	184.01	226.131	190.637	146.475	184.612	127.44	164.448	161.582	173.643	86.4431	171.94	136.213	208.541	170.588	138.312	173.934	121.628	197.344	173.117
tRNA-Pro-AGG-2-5	80.6838	71.3435	74.1795	55.9536	54.2548	61.3712	76.9398	92.2433	73.5102	52.7762	47.1699	43.9603	47.1099	39.9341	49.8442	50.9305	68.9789	54.283	52.8222	110.567	64.2216	73.4133	76.2126	76.5629	58.8318	73.5749	63.0848	86.9425	45.8415	61.4292	64.5043	60.2082	59.6552	70.3079	88.2927	60.5341	63.6656	44.0679	43.4108	53.3028	113.407	67.964	88.7981	41.1239	53.2415	75.412	60.8139	70.4343	89.9291
tRNA-Leu-AAG-2-3	99.761	84.8523	95.1737	94.3795	87.6423	74.5221	101.561	99.339	107.968	100.963	77.8795	71.8163	92.2568	66.7469	79.6361	84.2312	93.0564	83.1209	96.3228	134.26	91.8994	64.5147	98.6281	68.1112	79.4481	94.5964	102.109	103.747	53.4817	75.6052	99.7801	56.0076	90.7796	93.7439	84.2794	89.2082	65.7276	73.4465	84.7543	71.2083	157.307	112.988	72.653	63.209	82.7558	83.9263	77.031	78.6503	99.5017
tRNA-Pro-AGG-2-6	114.499	100.894	146.959	103.143	121.03	96.4404	113.871	106.435	135.534	76.8696	88.116	107.942	89.3125	91.8484	103.126	95.9844	98.9131	78.0318	111.859	94.7717	97.66	84.5365	125.527	112.359	107.607	140.581	111.792	96.4404	84.0427	110.258	140.239	128.817	115.42	99.6029	88.2927	108.324	116.763	73.4465	93.023	89.9038	128.041	114.556	123.779	51.7857	112.849	107.036	99.3294	93.8858	153.972
tRNA-Thr-TGT-3-1	145.661	146.909	153.957	128.086	154.417	122.742	92.3278	149.008	119.454	63.1019	98.762	127.093	125.626	122.655	112.866	105.779	119.086	83.1209	83.8941	171.116	127.093	95.6597	134.493	128.268	115.149	147.15	131.158	118.359	103.143	97.6567	178.395	135.118	159.513	111.321	160.532	146.556	134.033	73.4465	113.695	69.5532	182.915	133.078	125.125	47.9779	143.521	128.93	113.519	126.59	191.588
tRNA-Leu-TAG-2-1	45.3263	32.9278	27.9923	16.8535	20.8672	21.9183	49.2415	49.6695	27.5663	18.3569	22.9298	18.2805	23.5549	17.1146	26.9273	9.79433	45.5521	10.1781	31.0719	44.7533	31.4132	44.4929	67.2464	35.2985	30.673	38.1013	30.222	43.8366	30.561	25.2017	67.6719	14.0019	47.9835	29.295	24.0798	28.6741	30.6729	27.2801	12.4031	25.0903	62.1911	14.5332	44.399	23.6082	49.7692	31.6244	48.6511	24.0896	47.324
tRNA-Thr-TGT-4-1	51.3507	28.7063	13.9961	13.4828	45.9079	43.8366	21.5431	53.2173	36.7551	27.5354	13.0209	11.7518	24.5364	12.5507	15.4689	13.7121	40.9969	5.08903	46.6078	31.5906	20.9272	37.819	31.3817	15.9092	22.6276	18.3937	19.0722	21.1877	11.4604	14.176	54.8574	22.403	19.4528	43.9425	44.1464	31.8601	15.7231	16.7878	28.9405	12.1126	36.583	26.0742	17.4905	15.2311	11.5742	20.6775	32.4341	17.469	46.7847
tRNA-Pro-TGG-1-1	73.3326	45.5923	27.9923	20.8983	33.3876	52.6039	21.5431	39.026	41.3495	19.5042	17.3611	14.7985	21.592	14.2622	18.3335	23.5064	57.2655	30.5342	77.6797	47.3859	32.0433	33.3697	26.8986	24.3609	28.1588	19.7076	30.5155	30.6856	19.1006	31.5022	63.9284	35.7048	38.9055	49.8014	24.0798	35.0461	27.3221	31.4771	35.142	23.0966	69.5077	27.499	37.6719	12.9464	30.6717	29.1918	52.7054	20.8192	47.0543
tRNA-Tyr-GTA-5-3	14.1286	11.8202	8.39768	2.69656	8.34689	17.5346	0	7.09564	16.0804	5.73654	2.37487	1.30575	7.85165	6.84584	4.01045	3.91773	20.1731	6.78538	12.4288	21.0604	8.82091	0	0	6.96027	7.03971	3.94152	4.69468	6.57548	11.4604	7.87554	18.1418	7.70104	6.48426	5.85899	12.0399	6.37201	6.95939	12.5908	16.5374	8.31328	3.6583	4.70191	13.4543	7.61554	2.89356	6.08162	16.217	3.03115	7.14579
tRNA-Tyr-GTA-4-1	4.55415	5.06581	1.39961	3.3707	4.17344	8.76731	3.07759	0	4.59439	2.29462	1.96541	0.8705	0.981456	1.14097	1.71876	1.95887	6.50744	6.78538	3.10719	10.5302	7.87581	0	0	4.47446	5.02836	9.19687	6.16177	4.38366	7.64024	6.30043	22.3173	5.60076	6.48426	5.85899	8.02661	3.18601	2.83531	2.09847	2.06718	6.47006	3.6583	8.40644	9.41798	2.28466	2.31485	4.86529	4.05426	2.23348	5.39305
tRNA-Tyr-GTA-7-1	1.36266	1.6886	1.39961	2.02242	4.17344	0	6.15519	3.54782	4.59439	2.29462	0.982706	0.8705	0	1.71146	0.572921	0	3.25372	0	6.21438	5.2651	5.13053	4.44929	8.96619	2.98297	5.02836	1.31384	3.81443	1.46122	7.64024	3.15022	11.9506	0	2.5937	5.85899	8.02661	6.37201	4.38184	2.09847	6.20154	3.49835	7.3166	3.9895	2.69085	3.04622	1.15742	0	0	1.35604	3.50548
tRNA-Tyr-GTA-5-4	25.2451	20.6854	9.79729	4.04484	8.34689	17.5346	9.23278	7.09564	27.5663	9.17846	1.88352	1.741	3.92582	7.41633	7.44798	9.79433	32.5372	25.4452	40.3934	15.7953	20.3871	17.7972	8.96619	9.94324	19.1078	11.8245	14.6709	11.6897	38.2012	4.72532	41.899	30.8042	10.3748	17.577	52.173	12.744	14.1765	37.7725	12.4031	9.36654	54.8745	32.9134	59.1987	21.3235	12.153	8.51426	26.3527	9.01367	34.5155
tRNA-Thr-TGT-5-1	93.5214	81.8973	100.772	51.9087	95.9892	135.893	86.1726	88.6955	91.8878	76.8696	67.3973	75.7335	81.4608	78.7272	71.6152	76.3957	107.373	101.781	124.288	118.465	93.7446	106.783	85.1788	102.415	89.5048	95.9102	95.0674	105.208	106.963	58.279	126.129	93.8127	99.8576	105.462	100.333	108.324	103.102	100.727	101.292	19.6735	98.7741	106.292	76.6892	86.8171	123.266	103.387	36.4884	90.0569	115.142
tRNA-Tyr-GTA-5-5	143.402	156.196	160.955	128.761	141.897	127.126	184.656	188.034	167.695	148.003	157.724	166.701	154.089	195.677	189.637	158.668	169.844	161.153	195.753	147.423	178.713	222.464	130.01	194.888	168.953	173.427	198.35	173.885	233.027	144.91	161.549	119.716	172.481	187.488	188.625	168.858	173.212	172.075	181.912	39.7984	128.041	142.055	134.543	153.834	174.192	194.612	72.9767	188.489	187.139
tRNA-Pro-TGG-3-2	102.415	111.448	114.768	82.9191	62.6017	122.742	98.483	141.913	75.8074	111.289	94.3398	99.2371	83.4237	139.199	110.001	111.655	136.005	115.351	142.931	126.362	133.934	124.58	188.29	147.657	108.613	166.857	132.038	138.816	110.784	103.957	147.294	113.415	132.279	175.77	120.399	136.998	125.527	121.711	150.904	62.4812	117.066	143.907	87.4526	124.895	132.525	154.473	75.0038	128.026	146.691
tRNA-Arg-ACG-1-3	180.947	192.501	201.544	219.095	171.111	210.415	233.897	191.582	229.719	250.113	276.222	302.934	233.586	184.838	253.804	240.94	225.808	256.148	183.324	210.604	230.379	222.464	224.155	233.666	246.39	256.198	247.351	204.571	267.409	234.691	255.713	189.026	241.214	216.783	260.865	216.648	224.763	232.93	231.524	259.893	175.598	275.133	191.05	267.305	207.758	262.726	237.174	262.673	263.181
tRNA-Lys-CTT-1-1	84.2339	88.2295	78.3783	63.3691	62.6017	61.3712	49.2415	81.5999	64.3214	51.6289	54.2945	55.712	56.9244	73.0223	78.4902	82.2723	72.8833	96.6916	74.5725	84.2415	78.6231	84.5365	80.6957	86.5062	91.0134	95.9102	72.1808	95.7098	80.2226	99.2318	76.5989	89.6122	71.3268	87.8849	96.3193	50.9761	75.2646	117.514	93.023	80.3492	102.432	109.426	92.8343	82.2478	70.0241	72.9794	48.6511	98.3527	116.76
tRNA-Cys-GCA-8-1	11.7978	8.86517	1.39961	2.02242	0	4.38366	3.07759	0	9.18878	9.17846	4.74975	3.04675	4.90728	5.70487	4.01045	3.91773	4.55521	10.1781	6.21438	10.5302	9.90102	6.67393	0	7.45743	8.04538	6.56919	9.09595	8.0367	0	9.45065	3.74355	4.90066	3.89055	0	4.01331	12.744	13.1455	6.29541	8.26872	5.1911	10.9749	5.5568	4.03628	0.761554	5.20841	10.9469	2.02713	8.61484	8.08957
tRNA-Ala-AGC-15-1	12.4432	3.79936	0	6.06725	4.17344	13.151	21.5431	14.1913	13.7832	11.4731	8.59868	7.8345	20.6106	2.85243	10.8855	9.79433	6.50744	15.2671	31.0719	5.2651	4.41045	2.22464	4.4831	3.48013	4.52553	2.62768	1.76051	1.46122	3.82012	1.57511	3.88754	0	2.5937	8.78849	4.01331	0	2.06204	2.09847	26.8733	2.36985	3.6583	2.70716	1.34543	2.28466	0.578712	3.64897	8.10852	2.79184	2.5617
tRNA-Ile-AAT-5-4	129.56	135.933	109.17	151.007	171.111	118.359	120.026	99.339	78.1046	144.561	125.213	117.518	133.478	103.829	122.032	178.257	124.292	140.797	124.288	150.055	184.069	157.95	179.324	137.714	176.998	164.23	180.452	160.734	255.948	170.112	172.059	181.325	145.247	164.052	172.572	149.742	158.262	203.552	175.71	191.168	142.674	192.493	107.634	166.019	122.687	121.632	210.822	133.849	170.69
tRNA-Glu-TTC-2-2	156.778	155.774	95.1737	211.006	187.805	179.73	150.802	163.2	160.804	164.065	193.593	188.463	146.237	163.73	163.856	182.174	165.94	223.917	152.252	181.646	151.576	106.783	112.077	141.194	143.811	112.99	149.936	172.424	171.905	122.858	163.42	134.418	175.075	181.629	192.639	127.44	158.52	123.81	142.635	84.976	157.307	236.378	137.233	111.948	151.623	173.934	103.384	195.668	211.138
tRNA-Ser-GCT-4-2	134.258	141.421	141.361	144.266	112.683	135.893	132.336	180.939	179.181	165.212	182.62	179.758	134.459	160.877	156.98	125.367	132.101	169.634	142.931	128.995	155.041	173.522	143.459	148.651	148.337	147.15	173.703	142.469	122.244	165.386	139.663	151.221	165.997	134.757	156.519	146.556	135.579	161.582	148.837	192.672	124.382	157.443	142.615	156.119	141.784	148.391	137.845	157.141	144.534
tRNA-His-GTG-1-7	166.029	173.504	174.952	219.095	154.417	192.881	261.595	188.034	206.747	212.252	281.382	304.675	240.457	215.073	219.429	219.393	229.062	325.698	158.467	200.074	213.052	215.791	237.604	197.87	240.859	168.171	231.213	194.342	225.387	215.79	249.234	266.036	255.48	202.135	220.732	213.462	235.331	232.93	229.457	235.367	164.624	202.325	227.377	217.043	211.809	180.016	212.849	236.589	241.609
tRNA-His-GTG-1-8	170.189	194.612	216.94	265.611	196.152	149.044	187.733	216.417	172.29	197.337	214.639	204.568	218.865	190.543	194.793	272.282	251.838	249.363	177.11	244.827	254.996	251.385	233.121	241.621	263.486	256.198	300.753	219.913	271.229	223.665	292.573	240.833	177.669	243.148	260.865	254.881	262.91	295.884	214.987	110.442	223.156	267.154	263.703	245.982	210.651	244.481	206.767	230.686	224.89
tRNA-His-GTG-1-9	112.276	111.026	132.963	157.074	129.377	87.6731	98.483	88.6955	110.265	82.6062	81.7284	84.8738	97.1641	112.956	85.3653	78.3546	162.035	137.404	142.931	115.832	134.024	95.6597	89.6619	114.844	129.732	119.559	131.451	102.285	152.805	88.206	128.577	130.218	93.3733	105.462	128.426	121.068	132.744	140.598	103.359	50.9706	109.749	111.563	114.361	125.656	84.4919	109.469	89.1937	96.7574	107.456
tRNA-Gln-CTG-1-4	128.52	148.597	177.751	173.254	183.632	179.73	166.19	131.269	130.94	178.98	193.675	191.945	167.829	177.421	176.46	156.709	142.513	186.598	161.574	105.302	165.257	164.624	174.841	153.623	155.879	158.974	166.661	143.93	194.826	152.785	160.397	178.524	163.403	207.994	168.559	168.858	167.025	218.241	206.718	172.773	113.407	176.25	154.724	162.211	164.354	154.473	145.953	149.882	146.152
tRNA-Lys-CTT-1-2	62.3237	43.0594	41.9884	20.2242	25.0407	39.4529	46.1639	56.7651	43.6467	27.5354	13.1027	7.8345	19.6291	30.2358	30.3648	33.3007	42.9491	15.2671	49.715	42.1208	32.7184	42.2682	62.7634	40.2701	35.1985	40.729	34.6233	51.1427	38.2012	37.8026	40.4592	36.4049	20.7496	32.2245	44.1464	31.8601	35.3125	39.8709	26.8733	32.5008	54.8745	61.5523	29.5994	52.5472	46.8757	27.9754	40.5426	40.043	43.6837
tRNA-Cys-GCA-5-1	4.59001	2.11075	1.39961	1.34828	4.17344	4.38366	12.3104	3.54782	2.29719	0	0.655137	2.17625	0.981456	1.71146	1.14584	0	3.25372	1.69634	0	0	2.97031	2.22464	8.96619	0.994324	2.51418	1.31384	2.05392	2.19183	0	1.57511	2.30372	0	0	2.9295	12.0399	0	2.06204	0	0	2.67078	3.6583	1.99475	1.34543	1.52311	2.89356	0	0	1.1965	1.21344
tRNA-Arg-TCG-1-1	193.82	186.169	221.139	253.476	175.285	258.636	187.733	173.843	186.073	214.547	257.878	323.391	210.032	257.289	226.304	240.94	236.871	276.504	223.718	221.134	239.065	213.566	210.706	229.689	250.412	210.214	245.004	238.179	240.668	248.867	252.258	267.436	252.886	266.584	256.852	226.206	229.145	289.589	227.39	314.287	208.523	301.92	294.648	290.914	237.851	226.236	237.174	221.513	276.933
tRNA-Gly-CCC-2-2	155.917	191.234	176.351	198.871	196.152	175.346	200.044	159.652	153.912	214.547	234.048	225.895	190.402	188.261	220.575	225.27	159.432	220.525	146.038	176.381	237.579	206.892	246.57	225.214	228.288	194.448	237.668	243.293	252.128	240.991	215.542	225.431	225.652	199.206	260.865	172.044	221.927	209.847	233.591	226.979	153.649	248.061	200.468	273.398	203.707	222.587	212.849	235.233	194.824
tRNA-Arg-CCG-1-3	130.313	134.666	138.562	138.873	166.938	87.6731	107.716	124.174	105.671	128.498	144.13	140.586	117.775	126.078	134.637	168.462	113.229	144.189	121.18	139.525	164.987	142.377	138.976	136.72	145.823	140.581	156.979	145.391	137.524	138.609	151.47	137.219	163.403	123.039	164.546	117.882	155.426	169.976	148.837	137.075	120.724	206.029	90.1435	165.257	120.951	144.742	127.709	150.76	176.353
tRNA-Arg-CCT-3-1	81.5444	97.5169	61.583	93.7054	91.8158	83.2895	80.0174	74.5042	87.2934	76.8696	59.9451	60.935	66.739	71.8813	67.6047	90.1078	85.2475	67.8538	93.2156	55.2835	72.4124	91.2104	53.7972	84.5175	58.329	93.2825	81.8636	73.7915	76.4024	53.5537	42.6189	27.3037	80.4048	64.4489	56.1863	95.5802	81.4507	62.9541	57.881	42.8077	87.7992	54.4282	36.3265	54.8319	76.9687	79.061	66.8953	63.4148	52.1777
tRNA-Lys-CTT-3-1	49.2709	46.8588	55.9845	24.9432	41.7344	43.8366	46.1639	35.4782	34.4579	16.0623	12.7752	9.14025	19.6291	17.1146	13.1772	37.2184	31.2357	10.1781	27.9647	21.0604	29.9281	55.6161	53.7972	51.7048	37.2099	65.6919	31.9825	42.3753	57.3018	29.927	50.394	20.3028	36.3118	38.0835	20.0665	38.2321	47.1692	52.4618	33.0749	20.1625	36.583	30.3487	18.836	40.3624	48.6118	27.9754	66.8953	29.5936	41.2568
tRNA-Pro-TGG-3-3	49.8805	58.2568	88.1756	28.3138	54.2548	30.6856	6.15519	31.9304	13.7832	5.73654	9.00814	7.8345	7.85165	24.5309	16.6147	41.1362	22.776	15.2671	15.5359	13.1627	42.2143	66.7393	67.2464	52.202	45.7581	68.3196	57.2165	52.6039	80.2226	42.5279	105.827	79.1107	67.4363	52.7309	104.346	89.2082	60.8303	48.2648	41.3436	29.6795	54.8745	80.6449	55.1624	57.1165	64.8157	55.9509	52.7054	36.0547	59.728
tRNA-Lys-CTT-8-1	2.76118	5.48796	4.19884	1.34828	0	0	27.6983	10.6435	6.89158	1.14731	1.71974	0.8705	1.96291	0.570487	2.86461	17.6298	5.20595	0	6.21438	7.89764	6.7957	4.44929	8.96619	3.48013	9.05105	10.5107	3.52101	5.84487	0	12.6009	8.92693	6.30085	7.78111	2.9295	20.0665	3.18601	4.89735	6.29541	4.13436	3.04695	10.9749	3.13461	4.03628	6.09243	2.31485	2.43265	8.10852	4.54672	4.58409
tRNA-Pro-CGG-1-2	10.8296	10.9759	5.59845	3.3707	4.17344	8.76731	18.4656	14.1913	18.3776	4.58923	4.99542	3.91725	6.87019	2.28195	1.14584	17.6298	12.3641	10.1781	21.7503	13.1627	10.8011	4.44929	8.96619	3.48013	9.55389	5.25535	6.16177	12.4204	0	9.45065	8.351	14.0019	7.78111	5.85899	12.0399	19.116	4.6396	8.39388	10.3359	6.50768	0	4.41695	8.07255	4.56932	6.36583	6.08162	8.10852	4.22765	7.55027
tRNA-Lys-CTT-2-5	10.1482	7.17657	4.19884	4.04484	4.17344	0	21.5431	10.6435	6.89158	1.14731	2.94812	2.6115	0	3.42292	2.29169	5.8766	10.4119	5.08903	18.6431	18.4278	8.91092	13.3479	17.9324	2.98297	4.52553	10.5107	7.33544	5.84487	7.64024	9.45065	9.2149	3.50047	12.9685	8.78849	4.01331	3.18601	8.76368	2.09847	10.3359	8.16281	10.9749	5.69928	2.69085	3.80777	5.78712	6.08162	2.02713	7.65763	11.3254
tRNA-Lys-CTT-5-1	5.66579	4.64366	0	1.34828	4.17344	0	0	0	4.59439	1.14731	1.80163	1.741	3.92582	0.570487	6.30214	5.8766	3.90446	0	6.21438	2.63255	6.70569	4.44929	4.4831	4.47446	5.5312	6.56919	5.28152	2.92244	3.82012	4.72532	4.31948	2.80038	9.07796	8.78849	4.01331	3.18601	3.86633	2.09847	4.13436	3.46073	0	2.4222	5.3817	3.04622	4.05098	1.21632	14.1899	2.39301	5.93235
tRNA-Pro-AGG-2-7	28.4007	12.6645	13.9961	8.08967	8.34689	8.76731	15.388	7.09564	27.5663	4.58923	4.50407	3.91725	6.87019	3.99341	5.72921	5.8766	21.4745	15.2671	24.8575	13.1627	13.5014	11.1232	31.3817	8.45175	6.53687	10.5107	15.2577	9.49792	7.64024	14.176	13.1024	8.40114	7.78111	17.577	20.0665	22.302	10.568	14.6893	28.9405	7.78665	10.9749	9.5463	5.3817	15.9926	5.20841	1.21632	24.3256	10.0506	10.6513
tRNA-Pro-TGG-3-4	13.77	9.70947	9.79729	4.71897	4.17344	8.76731	24.6207	10.6435	22.9719	5.73654	6.63327	6.0935	18.6477	5.70487	8.59382	13.7121	13.6656	5.08903	40.3934	2.63255	8.14584	11.1232	8.96619	7.95459	8.54822	7.88303	7.62886	8.0367	3.82012	0	4.46347	8.40114	3.89055	11.718	0	19.116	9.02144	6.29541	6.20154	5.22871	10.9749	4.41695	5.3817	10.6618	6.94454	2.43265	8.10852	6.22183	7.01096
tRNA-Pro-TGG-3-5	17.3918	10.5538	8.39768	14.8311	25.0407	17.5346	55.3967	17.7391	39.0523	20.6515	17.9344	13.4928	31.4066	9.69827	12.0314	13.7121	18.8716	8.48172	21.7503	18.4278	10.4411	22.2464	13.4493	14.4177	4.02269	5.25535	9.09595	6.57548	7.64024	6.30043	7.77507	10.5014	7.78111	17.577	0	6.37201	12.3723	6.29541	16.5374	4.9654	18.2915	4.13198	6.72713	11.4233	5.78712	17.0285	18.2442	12.9223	14.1568
tRNA-Pro-AGG-2-8	18.3959	14.3531	12.5965	2.69656	12.5203	13.151	58.4743	21.2869	20.6747	16.0623	19.736	8.26975	19.6291	9.12779	10.8855	9.79433	14.9671	13.5708	15.5359	10.5302	11.7012	20.0218	8.96619	13.4234	9.05105	14.4522	12.9104	10.2285	15.2805	17.3262	7.34312	6.30085	12.9685	23.436	4.01331	19.116	14.9498	10.4924	18.6046	8.83991	14.6332	3.27709	2.69085	10.6618	8.68068	7.29794	18.2442	11.4864	10.3816
tRNA-Lys-CTT-4-1	12.2998	8.44302	4.19884	1.34828	12.5203	4.38366	24.6207	10.6435	25.2691	6.88385	5.32299	4.3525	11.7775	5.13438	4.58337	9.79433	6.50744	3.39269	6.21438	5.2651	8.37086	4.44929	0	5.96594	4.02269	6.56919	4.40127	7.30609	7.64024	3.15022	6.47923	5.60076	2.5937	11.718	12.0399	19.116	6.44388	12.5908	4.13436	6.39483	3.6583	4.84439	1.34543	0.761554	3.47227	1.21632	10.1357	4.86579	6.87614
tRNA-Pro-AGG-1-1	8.17595	6.33226	2.79923	3.3707	12.5203	0	12.3104	17.7391	13.7832	1.14731	2.78433	2.17625	6.87019	2.85243	2.29169	7.83546	10.4119	11.8744	15.5359	0	6.25564	4.44929	13.4493	5.96594	7.03971	6.56919	4.40127	4.38366	0	6.30043	5.0394	4.90066	7.78111	5.85899	12.0399	3.18601	5.92837	8.39388	0	7.48571	3.6583	3.13461	1.34543	6.85398	1.73614	4.86529	8.10852	3.82882	4.71892
tRNA-Arg-CCT-5-1	1.1475	1.6886	1.39961	0	0	0	9.23278	3.54782	6.89158	1.14731	1.63784	0.8705	0.981456	0.570487	0.572921	3.91773	1.95223	5.08903	3.10719	0	4.05042	4.44929	4.4831	1.98865	3.01702	1.31384	2.93418	3.65305	0	1.57511	2.30372	0.700095	1.29685	5.85899	4.01331	3.18601	2.3198	8.39388	0	1.88083	0	1.42482	0	3.04622	0.578712	1.21632	2.02713	2.39301	2.29205
tRNA-Thr-CGT-2-1	156.383	174.77	155.357	160.445	129.377	184.114	110.793	134.817	128.643	125.057	130.454	160.607	136.422	131.782	136.355	146.915	143.814	166.242	177.11	165.851	218.812	189.095	183.807	170.029	196.106	169.485	227.692	172.424	210.107	166.961	141.247	184.125	194.528	166.981	148.492	178.416	203.884	226.635	179.845	124.511	186.573	205.602	170.869	168.303	173.035	175.151	119.601	200.295	156.264
tRNA-Leu-TAG-3-1	127.982	126.223	149.759	148.311	116.856	179.73	138.492	152.556	151.615	159.476	160.591	154.514	152.126	114.668	136.928	141.038	130.8	156.064	139.823	105.302	152.071	142.377	103.111	128.765	149.845	128.756	155.805	166.579	164.265	144.91	138.655	152.621	155.622	149.404	164.546	108.324	151.302	163.681	146.77	146.366	157.307	159.295	147.997	169.827	139.47	159.338	147.981	150.839	127.815
tRNA-Leu-AAG-2-4	210.423	240.204	232.336	243.364	237.886	241.101	150.802	152.556	211.342	187.011	176.068	228.506	188.44	189.972	208.543	213.516	227.76	259.541	146.038	200.074	235.464	238.037	251.053	217.26	226.779	260.14	245.004	230.142	259.768	239.416	283.214	263.236	320.322	263.655	309.025	238.951	267.035	268.604	252.196	246.013	274.373	292.373	252.94	268.067	250.004	262.726	302.042	246.879	260.484
tRNA-Leu-CAG-2-1	160.328	160.84	218.34	157.749	129.377	227.95	153.88	159.652	140.129	182.422	163.211	141.456	169.792	173.428	171.304	160.627	154.226	108.566	186.431	163.218	177.543	218.015	165.875	177.984	166.942	193.134	189.548	176.807	179.546	165.386	144.415	84.7115	134.873	131.827	160.532	108.324	138.672	96.5297	111.628	167.469	146.332	157.3	157.415	151.549	178.822	200.693	192.577	186.017	134.287
tRNA-Leu-CAG-2-2	187.007	201.366	230.936	239.994	187.805	263.019	190.811	156.104	225.125	239.787	254.193	255.492	241.438	232.759	237.189	272.282	242.727	261.237	195.753	247.46	224.978	233.588	219.672	222.231	253.932	233.863	250.579	201.648	229.207	240.991	255.425	220.53	260.667	240.219	240.798	216.648	241.775	262.309	235.658	279.529	226.815	255.47	232.759	229.989	237.851	235.967	214.876	230.128	212.351
tRNA-Gly-GCC-3-1	22.3046	14.3531	2.79923	1.34828	0	13.151	9.23278	7.09564	4.59439	2.29462	1.14649	1.741	3.92582	1.71146	2.29169	5.8766	0.650744	1.69634	6.21438	5.2651	7.02072	8.89858	8.96619	12.9262	11.0624	6.56919	6.45519	4.38366	3.82012	7.87554	3.3116	7.70104	6.48426	2.9295	0	0	11.599	4.19694	4.13436	3.42311	0	2.84964	2.69085	2.28466	0.578712	8.51426	0	9.33274	1.88757
tRNA-Gly-GCC-2-4	65.7304	61.634	13.9961	6.06725	12.5203	17.5346	18.4656	3.54782	6.89158	2.29462	1.55595	6.52875	5.88873	1.14097	3.43753	15.6709	5.20595	3.39269	12.4288	10.5302	21.1522	66.7393	17.9324	93.4665	26.1475	18.3937	18.1919	23.3795	0	18.9013	8.20702	1.40019	33.7181	17.577	8.02661	19.116	61.8613	8.39388	6.20154	4.10021	3.6583	9.26134	0	3.80777	4.6297	53.5182	0	74.8214	3.50548
tRNA-Gly-GCC-5-1	5.59407	6.33226	5.59845	2.69656	0	8.76731	24.6207	0	6.89158	1.14731	1.22838	1.741	0	1.71146	4.01045	1.95887	3.25372	3.39269	3.10719	23.6929	8.68589	4.44929	8.96619	17.4007	10.5596	3.94152	4.10785	4.38366	7.64024	4.72532	4.1755	6.30085	6.48426	5.85899	4.01331	9.55802	13.1455	16.7878	6.20154	3.34788	10.9749	4.55943	8.07255	3.04622	8.10197	9.73058	6.08139	8.29577	6.87614
tRNA-Gly-GCC-2-5	20.8702	36.305	11.1969	1.34828	4.17344	8.76731	15.388	3.54782	9.18878	0	1.31027	2.17625	1.96291	3.42292	1.71876	15.6709	2.60298	5.08903	9.32156	7.89764	13.7264	42.2682	35.8648	85.0147	15.5879	9.19687	8.50912	9.49792	7.64024	20.4764	3.74355	4.20057	19.4528	11.718	4.01331	19.116	61.8613	0	6.20154	4.0626	7.3166	3.13461	4.03628	5.33088	10.4168	37.706	4.05426	48.8174	5.1234
tRNA-Met-CAT-2-1	57.16	24.4848	6.99807	5.39311	50.0813	35.0692	49.2415	21.2869	18.3776	11.4731	3.19379	2.17625	43.1841	3.99341	4.01045	7.83546	43.5998	23.7488	74.5725	28.958	18.6769	15.5725	4.4831	12.429	14.5823	9.19687	13.7906	7.30609	3.82012	11.0258	19.7256	7.00095	7.78111	14.6475	24.0798	3.18601	6.44388	6.29541	12.4031	14.0686	32.9247	12.8234	2.69085	1.52311	9.8381	17.0285	14.1899	5.26462	26.5608
tRNA-Lys-TTT-1-1	10.3634	3.37721	6.99807	4.71897	0	0	6.15519	7.09564	4.59439	3.44192	1.63784	2.17625	3.92582	1.71146	4.58337	3.91773	2.60298	5.08903	6.21438	0	6.21064	2.22464	4.4831	2.98297	7.54254	1.31384	3.52101	4.38366	3.82012	3.15022	3.02364	2.10028	2.5937	5.85899	0	0	4.12409	2.09847	8.26872	1.8056	0	3.41957	0	2.28466	2.89356	4.86529	2.02713	4.38718	2.15722
tRNA-Met-CAT-6-1	157.136	173.082	194.546	310.104	237.886	232.334	147.724	141.913	144.723	219.136	216.932	240.693	216.902	253.867	241.2	184.133	238.172	271.415	211.289	155.32	231.819	200.218	260.02	212.785	226.779	224.666	239.722	223.566	263.588	261.468	129.153	198.127	229.543	205.065	148.492	219.834	250.538	195.158	268.733	189.437	212.181	228.684	211.232	142.411	168.984	235.967	241.229	256.61	183.498
tRNA-Lys-TTT-3-5	112.886	143.953	163.755	123.367	133.55	122.742	150.802	149.008	160.804	165.212	192.365	175.406	153.107	140.34	144.376	164.545	108.674	147.582	118.073	134.26	135.599	109.008	125.527	132.742	131.24	136.639	141.427	148.314	129.884	105.532	131.6	131.618	143.951	152.334	128.426	89.2082	130.94	90.2342	152.971	83.8475	120.724	138.493	127.815	147.741	146.993	145.959	121.628	138.635	115.951
tRNA-Gln-CTG-1-5	107.435	117.78	104.971	100.447	112.683	96.4404	153.88	120.626	137.832	168.654	153.712	133.187	127.589	114.668	133.491	131.244	98.2623	118.744	74.5725	171.116	113.502	104.558	147.942	113.85	117.161	152.405	122.649	126.395	133.704	108.682	115.618	115.516	101.154	128.898	120.399	92.3942	104.906	92.3327	126.098	86.7816	128.041	115.695	107.634	131.749	127.317	117.983	99.3294	110.956	107.187
tRNA-Leu-TAG-1-1	121.277	108.915	79.7779	91.6829	133.55	52.6039	144.647	81.5999	107.968	153.739	128.898	100.978	141.33	91.8484	107.709	123.409	78.74	64.4611	68.3581	94.7717	103.916	86.7611	98.6281	72.0885	77.4368	99.8517	99.4686	96.4404	80.2226	83.4807	96.3245	94.5128	84.2953	84.9554	124.412	101.952	74.2335	98.6281	97.1574	79.1454	120.724	100.735	75.3438	71.5861	90.2791	90.0079	95.2751	65.4089	95.5918
tRNA-Arg-TCT-2-1	64.0091	53.6132	32.1911	39.1001	58.4282	48.2202	70.7846	60.3129	55.1327	65.3966	68.38	45.7013	69.6834	41.6455	38.9587	56.8071	43.5998	35.6232	37.2863	39.4882	53.5105	48.9422	49.3141	33.3099	41.7354	40.729	43.1324	39.4529	34.3811	25.2017	55.8653	56.0076	33.7181	32.2245	80.2661	35.0461	35.3125	33.5755	59.9482	29.7172	36.583	34.1957	34.9811	27.4159	38.195	32.8407	52.7054	28.1578	38.4255
tRNA-Gly-GCC-2-6	59.5984	74.7207	55.9845	112.581	62.6017	70.1385	61.5519	60.3129	64.3214	80.3116	112.028	95.755	83.4237	74.7338	85.9382	99.9021	74.8355	111.959	105.644	86.8741	61.7013	55.6161	67.2464	49.219	56.8205	52.5535	55.7494	56.9875	49.6616	45.6781	51.6898	65.1088	75.2174	52.7309	60.1996	60.5341	64.4388	35.674	115.762	33.4036	62.1911	42.1747	65.9258	38.0777	46.297	59.5998	36.4884	66.765	60.4021
tRNA-Ser-CGA-1-1	160.399	191.234	256.129	221.792	200.325	236.717	138.492	212.869	165.398	184.717	234.212	215.449	204.143	217.355	223.439	248.776	206.937	156.064	155.359	189.543	226.553	298.102	170.358	259.519	230.299	240.432	244.417	248.407	248.308	242.567	244.339	253.434	291.792	254.866	232.772	264.439	263.426	272.801	227.39	245.223	237.79	168.841	191.05	233.797	257.527	289.485	204.74	269.932	249.968
tRNA-Thr-AGT-5-1	67.5951	63.7448	86.776	124.042	121.03	43.8366	89.2502	85.1477	66.6186	88.3427	104.904	101.413	91.2754	114.668	93.3862	90.1078	94.3579	86.5136	93.2156	78.9764	62.0614	64.5147	76.2126	75.0715	89.002	93.2825	59.2704	70.8691	45.8415	92.9314	106.547	122.517	103.748	61.5194	88.2927	89.2082	84.8015	69.2495	88.8887	125.038	120.724	37.0453	107.634	63.9705	56.1351	74.1957	58.7868	71.7105	97.0749
tRNA-Trp-CCA-3-3	110.842	133.822	146.959	144.94	125.203	122.742	89.2502	120.626	126.346	106.7	113.994	94.014	118.756	120.373	142.085	131.244	104.77	103.477	96.3228	102.669	156.121	160.174	156.908	123.296	145.823	132.698	159.326	146.122	137.524	144.91	117.202	126.017	141.357	140.616	148.492	130.626	131.455	148.991	157.106	95.9601	135.357	145.047	118.397	137.08	153.937	122.849	133.791	119.89	117.029
tRNA-Ser-GCT-4-3	160.005	200.944	205.743	203.59	212.846	135.893	200.044	195.13	190.667	164.065	213.083	187.593	194.328	223.06	230.887	203.722	186.763	176.42	146.038	152.688	203.961	246.936	215.189	230.683	225.271	210.214	218.303	239.64	221.567	229.966	182.426	212.129	191.934	210.924	236.785	223.02	200.018	207.749	198.449	205.462	149.99	224.267	184.323	227.705	230.906	231.101	188.523	201.651	167.859
tRNA-Thr-AGT-1-1	138.095	169.283	187.548	143.592	196.152	153.428	166.19	149.008	158.506	125.057	164.931	153.208	127.589	203.664	177.606	176.298	149.671	115.351	114.966	123.73	160.081	200.218	179.324	204.334	185.044	170.799	159.326	185.575	152.805	192.163	153.342	184.125	154.325	152.334	184.612	156.114	173.469	193.059	140.568	177.287	117.066	171.548	145.306	180.488	183.452	181.232	129.736	177.003	136.849
tRNA-Ile-AAT-5-5	125.903	179.836	188.948	136.176	171.111	192.881	150.802	191.582	149.318	121.615	137.088	156.69	126.608	206.516	171.876	178.257	109.976	79.7282	111.859	110.567	156.121	246.936	242.087	207.814	184.038	191.82	166.661	183.383	152.805	181.137	171.628	161.022	163.403	164.052	192.639	149.742	207.751	159.484	126.098	192.484	142.674	174.398	145.306	188.865	203.707	226.236	141.899	209.069	154.241
tRNA-Trp-CCA-1-1	109.837	107.648	99.3725	116.626	137.724	87.6731	116.949	120.626	151.615	127.351	140.936	124.046	124.645	104.399	112.866	148.874	78.74	61.0684	93.2156	92.1392	100.315	71.1886	94.145	87.0033	115.652	120.873	103.576	108.861	84.0427	88.206	105.395	70.7096	90.7796	55.6604	108.359	133.812	89.9566	100.727	119.896	54.5818	80.4826	85.7742	87.4526	83.0094	123.844	90.0079	99.3294	77.8526	97.3445
tRNA-Gly-TCC-3-1	163.376	181.947	230.936	183.366	217.019	149.044	169.268	188.034	209.045	224.872	231.755	226.765	196.291	195.677	226.877	242.899	170.495	144.189	121.18	113.2	182.044	182.421	183.807	190.413	186.552	212.842	198.057	198.726	194.826	168.537	180.842	157.521	191.934	152.334	160.532	210.276	174.5	161.582	202.584	140.423	175.598	189.216	162.796	161.449	224.54	187.314	147.981	173.094	176.353
tRNA-Asp-GTC-2-11	163.555	180.681	219.739	160.445	217.019	206.032	187.733	180.939	211.342	232.904	230.035	218.496	204.143	232.759	249.794	244.858	184.161	167.938	133.609	189.543	205.311	204.667	210.706	224.717	241.361	229.922	205.686	219.183	233.027	217.365	192.793	231.031	207.496	152.334	156.519	194.346	202.08	256.013	192.248	215.581	171.94	220.277	235.449	199.527	243.059	228.669	172.306	198.939	192.667
tRNA-Pro-CGG-1-3	146.235	164.217	169.353	185.388	125.203	179.73	163.112	145.461	126.346	141.119	179.917	170.183	192.365	183.126	176.46	146.915	137.958	142.493	105.644	157.953	190.235	197.993	201.739	205.328	206.163	229.922	186.614	228.681	259.768	201.614	177.387	203.728	178.966	187.488	128.426	197.532	198.214	241.324	146.77	193.5	175.598	182.947	181.632	213.997	218.174	195.828	158.116	173.413	166.645
tRNA-Thr-AGT-1-2	74.6235	54.8796	32.1911	36.4035	54.2548	61.3712	83.095	60.3129	64.3214	65.3966	55.6867	60.4998	52.9986	54.1962	46.4066	52.8894	22.1253	15.2671	24.8575	21.0604	31.9083	46.7175	35.8648	46.2361	34.1929	35.4736	31.3957	54.7957	38.2012	18.9013	44.7787	21.0028	45.3898	26.3655	16.0532	54.1621	40.2098	41.9694	39.2764	22.9462	36.583	19.6625	17.4905	25.1313	30.093	46.2203	54.7325	39.1656	22.2463
tRNA-Ser-AGA-2-6	124.11	111.448	85.3764	83.5933	121.03	127.126	116.949	117.078	91.8878	96.3739	86.3144	87.9205	79.4979	95.2713	92.2404	101.861	58.567	55.9794	99.43	55.2835	68.6321	104.558	62.7634	100.924	67.3801	73.5749	63.9651	95.7098	64.9421	59.8541	87.1096	27.3037	82.9985	67.3784	56.1863	98.7662	90.7299	71.348	103.359	37.9176	95.1158	46.1642	26.9085	55.5934	74.6538	87.5753	87.1666	83.9947	47.9981
tRNA-Ile-AAT-4-1	102.307	94.1397	82.5772	71.4588	87.6423	96.4404	64.6294	106.435	87.2934	64.2492	53.5575	60.935	61.8317	73.5928	69.8964	62.6837	66.3759	33.9269	68.3581	71.0788	65.3467	95.6597	62.7634	89.9863	64.8659	86.7133	59.5638	79.6364	76.4024	37.8026	82.7901	27.3037	80.4048	67.3784	40.1331	101.952	82.7395	94.4312	82.6872	38.7828	84.1409	41.7473	29.5994	69.3014	63.6583	80.2773	87.1666	86.3877	43.5489
tRNA-Trp-CCA-2-1	87.3178	83.5859	96.5733	159.097	83.4689	105.208	55.3967	70.9564	98.7794	110.142	118.007	119.694	108.942	105.54	111.147	92.0667	102.167	71.2465	102.537	76.3439	101.215	122.355	58.2803	111.861	82.4651	60.4366	93.0134	97.171	72.5823	70.8798	69.6877	73.51	77.8111	90.8144	76.2528	105.138	100.782	44.0679	111.628	23.2847	62.1911	76.9403	57.8533	61.6859	85.0707	80.2773	44.5969	106.569	87.0977
tRNA-Gly-CCC-3-1	2.00813	3.79936	0	2.02242	0	4.38366	3.07759	7.09564	13.7832	5.73654	2.21109	3.91725	0.981456	3.42292	0.572921	0	0	6.78538	0	2.63255	5.53557	0	0	4.97162	3.51985	1.31384	2.64076	2.92244	3.82012	1.57511	1.87178	2.80038	3.89055	2.9295	4.01331	0	2.06204	2.09847	0	2.0313	0	2.13723	1.34543	2.28466	2.31485	1.21632	4.05426	1.67511	1.48309
tRNA-Thr-CGT-4-1	102.199	100.05	89.5752	112.581	104.336	92.0568	40.0087	70.9564	55.1327	98.6685	68.1343	74.4278	96.1827	66.1765	73.3339	48.9716	78.0893	72.9428	93.2156	105.302	114.807	104.558	67.2464	89.9863	92.019	80.1441	108.271	92.0568	106.963	126.009	135.632	116.216	95.967	87.8849	124.412	111.51	98.2048	107.022	121.964	143.583	109.749	171.406	100.907	123.372	94.9088	68.1141	81.0852	79.9265	102.198
tRNA-Asn-GTT-2-5	100.586	113.559	90.9748	137.524	129.377	118.359	126.181	109.982	158.506	158.328	189.417	142.762	178.625	124.937	135.782	146.915	102.167	84.8172	155.359	92.1392	148.245	122.355	130.01	140.2	159.399	131.384	149.936	151.967	137.524	135.459	140.815	128.817	110.232	131.827	108.359	124.254	103.618	128.007	144.703	65.4906	80.4826	132.223	95.5252	130.987	119.793	124.065	105.411	93.4072	127.68
tRNA-Cys-GCA-14-1	12.0488	8.44302	11.1969	3.3707	8.34689	8.76731	30.7759	24.8347	6.89158	8.03116	8.43489	6.964	8.8331	6.27535	8.0209	5.8766	5.20595	5.08903	9.32156	7.89764	7.29075	4.44929	13.4493	3.48013	9.55389	5.25535	6.45519	8.76731	3.82012	15.7511	6.04728	2.80038	6.48426	8.78849	0	9.55802	4.6396	2.09847	6.20154	7.6738	14.6332	5.27184	8.07255	2.28466	2.31485	4.86529	6.08139	5.10509	4.44927
tRNA-Cys-GCA-2-2	59.957	45.1701	43.388	41.1225	41.7344	56.9875	55.3967	39.026	18.3776	51.6289	69.854	54.4063	58.8873	42.216	43.542	60.7248	39.6954	20.3561	59.0366	34.2231	47.2099	60.0654	58.2803	40.2701	51.7921	45.9843	46.6534	47.4896	38.2012	33.0773	56.1533	37.8051	33.7181	26.3655	36.1197	28.6741	40.7253	41.9694	33.0749	67.1457	43.8996	41.6048	49.7807	58.6396	53.8202	34.057	85.1395	35.5761	38.5603
tRNA-Cys-GCA-4-1	95.8523	124.535	123.166	122.693	125.203	118.359	86.1726	95.7911	66.6186	96.3739	123.903	126.658	93.2383	110.674	108.282	129.285	130.149	139.1	118.073	121.097	148.065	144.602	125.527	150.64	151.354	155.033	167.248	130.048	152.805	116.558	147.438	150.52	162.106	134.757	144.479	76.4642	151.56	119.613	124.031	89.5652	120.724	126.524	184.323	137.841	120.951	109.469	91.2209	127.946	128.22
tRNA-Cys-GCA-2-3	101.841	126.645	113.369	112.581	100.163	118.359	138.492	124.174	121.751	115.878	134.467	134.492	106.979	107.251	130.626	148.874	90.4534	105.173	55.9294	84.2415	139.829	115.682	138.976	153.126	144.314	131.384	142.308	124.934	164.265	121.283	121.665	137.919	129.685	105.462	144.479	79.6502	153.88	119.613	103.359	96.1481	87.7992	131.796	133.197	150.788	108.798	127.714	117.574	124.277	113.658
tRNA-Cys-GCA-2-4	121.85	139.732	111.969	115.952	95.9892	113.975	129.259	141.913	117.157	135.382	137.415	135.363	108.942	128.36	140.939	115.573	121.689	128.922	124.288	110.567	162.197	144.602	206.222	161.08	150.348	191.82	160.206	141.738	129.884	149.635	130.304	149.12	172.481	181.629	128.426	140.184	153.107	117.514	132.299	114.881	98.7741	135.785	170.869	150.026	130.789	133.796	93.248	134.726	116.76
tRNA-Gln-TTG-1-1	218.312	239.36	265.926	223.814	208.672	170.963	236.975	219.965	232.017	208.81	236.341	262.021	251.253	228.765	255.523	291.871	246.632	269.719	226.825	247.46	264.852	231.363	237.604	262.502	286.617	282.475	276.693	287.86	347.631	269.343	254.562	316.443	319.025	295.879	232.772	318.601	284.82	310.574	289.405	267.417	237.79	254.331	285.23	297.768	293.986	256.644	229.066	268.655	242.148
tRNA-Arg-CCG-2-1	113.854	114.825	111.969	132.805	125.203	140.277	89.2502	124.174	124.048	103.258	93.1933	124.046	105.997	124.366	97.3967	113.614	149.02	174.723	127.395	121.097	139.649	113.457	165.875	101.421	119.675	145.836	147.589	124.934	122.244	152.785	92.5809	104.314	101.154	102.532	112.373	156.114	121.918	197.256	128.165	185.563	95.1158	208.024	110.325	166.019	138.312	108.253	137.845	97.1562	119.861
tRNA-Arg-CCT-1-1	113.961	105.538	93.7741	148.985	141.897	175.346	126.181	141.913	73.5102	122.762	117.515	114.471	98.1456	150.038	124.324	129.285	115.182	140.797	102.537	102.669	127.183	117.906	147.942	127.273	103.584	112.99	122.355	131.51	64.9421	110.258	102.228	58.1079	129.685	143.545	116.386	86.0222	127.589	92.3327	132.299	86.8945	124.382	100.735	51.1262	67.0167	109.955	85.1426	105.411	117.577	103.412
tRNA-Arg-CCT-2-1	139.493	133.822	134.363	189.433	141.897	166.579	144.647	141.913	119.454	178.98	171.155	169.748	161.94	188.831	163.856	152.791	142.513	150.975	146.038	121.097	157.291	142.377	147.942	148.154	123.195	145.836	151.404	162.195	126.064	152.785	122.673	95.913	155.622	161.122	128.426	136.998	126.816	130.105	144.703	146.404	117.066	137.638	75.3438	85.294	115.164	121.632	123.655	130.419	116.894
tRNA-Arg-TCG-3-1	133.469	132.133	120.367	151.681	129.377	131.51	141.569	141.913	110.265	175.538	187.943	155.82	148.2	158.025	150.678	154.75	105.421	115.351	121.18	121.097	116.427	151.276	98.6281	130.256	96.0417	115.618	113.553	111.053	64.9421	103.957	110.435	52.5071	110.232	123.039	108.359	114.696	121.918	75.5449	117.829	109.728	62.1911	147.184	61.8896	55.5934	101.853	133.796	129.736	118.135	92.356
tRNA-iMet-CAT-1-8	111.128	104.271	116.168	127.412	112.683	100.824	12.3104	88.6955	52.8355	52.7762	23.8306	18.2805	54.9615	91.2779	68.1777	80.3135	89.1519	100.084	93.2156	126.362	125.113	120.131	130.01	118.325	103.584	128.756	130.571	105.208	95.5031	107.107	103.668	67.2091	130.982	102.532	88.2927	105.138	107.484	144.794	121.964	100.436	102.432	120.967	110.325	95.9558	90.8578	125.281	119.601	87.9032	92.4908
tRNA-Phe-GAA-1-6	114.212	131.711	141.361	160.445	116.856	140.277	116.949	134.817	126.346	118.173	155.513	163.654	153.107	119.802	135.782	162.586	120.388	132.315	133.609	144.79	125.518	102.334	125.527	87.0033	92.5219	115.618	125.876	115.436	145.165	97.6567	142.543	154.021	155.622	169.911	124.412	136.998	152.591	205.65	157.106	189.851	109.749	161.432	169.524	176.68	131.368	143.526	141.899	127.149	113.389
tRNA-Asn-GTT-2-6	135.226	166.75	190.347	199.545	183.632	201.648	113.871	138.365	156.209	137.677	194.903	202.391	183.532	150.038	187.918	211.557	143.814	164.545	139.823	181.646	166.337	133.479	152.425	123.793	119.675	149.778	173.997	147.583	187.186	114.983	212.087	214.229	217.871	196.276	192.639	200.718	202.596	239.226	212.919	233.298	139.015	204.177	200.468	239.128	164.354	182.448	196.632	171.26	151.949
tRNA-Gly-TCC-1-1	132.106	156.618	173.552	171.905	158.591	153.428	138.492	156.104	149.318	153.739	205.631	230.683	161.94	156.884	177.033	176.298	153.576	162.849	130.502	134.26	166.742	186.87	147.942	119.816	152.359	136.639	177.224	138.816	191.006	163.811	164.284	216.329	178.966	158.193	148.492	156.114	181.202	193.059	200.516	220.622	153.649	190.214	180.287	194.958	170.72	150.824	186.496	158.258	149.927
tRNA-Val-CAC-3-1	56.1918	70.9214	53.1853	78.8743	58.4282	83.2895	52.3191	70.9564	55.1327	83.7535	81.9741	77.4745	66.739	58.1896	61.8755	82.2723	58.567	45.8013	40.3934	52.651	54.4556	77.8626	103.111	70.0998	53.8035	74.8888	50.7613	52.6039	99.3232	63.0043	58.1691	73.51	85.5922	58.5899	72.2395	76.4642	64.6966	86.0373	76.4856	52.5505	84.1409	56.7079	67.2713	66.2552	83.3345	74.1957	56.7597	61.979	53.6608
tRNA-Thr-AGT-1-3	258.116	253.713	279.923	358.642	317.182	306.856	209.276	251.895	257.286	309.773	272.046	314.686	268.919	309.204	300.211	313.418	313.008	381.677	254.789	426.473	339.74	202.443	349.682	233.169	303.713	319.263	378.216	276.17	374.372	403.228	413.663	298.24	316.432	366.187	441.464	318.601	298.738	274.9	353.488	381.395	256.081	408.496	283.885	321.376	340.861	315.028	332.449	293.064	366.323
tRNA-Lys-CTT-10-1	1.79297	1.6886	0	2.02242	4.17344	4.38366	6.15519	3.54782	9.18878	1.14731	0.900814	1.30575	0.981456	2.28195	0.572921	3.91773	1.30149	0	6.21438	0	3.24033	0	0	1.49149	2.01134	2.62768	1.76051	1.46122	0	0	1.00788	0	1.29685	2.9295	4.01331	0	1.28878	0	4.13436	1.65513	0	0.997375	1.34543	0	1.15742	4.86529	0	0.877437	0.404479
tRNA-Ile-TAT-1-1	159.861	217.408	253.33	225.837	116.856	223.566	181.578	258.991	250.394	206.515	215.95	269.42	171.755	215.644	251.513	323.213	217.999	279.897	183.324	210.604	318.453	313.675	273.469	307.246	345.951	283.789	346.233	287.86	324.71	292.97	339.223	303.841	381.274	345.681	317.051	302.671	339.464	358.838	270.8	165.325	248.764	305.909	308.102	328.991	326.394	334.489	314.205	262.274	275.989
tRNA-SeC-TCA-1-1	114.93	127.49	146.959	91.0088	154.417	127.126	83.095	106.435	87.2934	73.4277	50.5275	57.453	71.6463	98.1237	107.136	107.738	158.782	150.975	124.288	118.465	157.966	131.254	116.561	128.765	164.427	164.23	164.901	160.734	129.884	111.833	163.133	176.424	160.81	134.757	172.572	114.696	132.744	151.09	132.299	104.386	120.724	163.427	122.434	150.788	134.261	131.363	97.3023	142.863	156.533
tRNA-Lys-CTT-11-1	2.04399	2.11075	2.79923	0.674139	0	4.38366	9.23278	14.1913	2.29719	1.14731	1.71974	2.6115	0.981456	0.570487	0	5.8766	5.8567	6.78538	0	0	5.26554	0	0	2.48581	1.50851	1.31384	3.2276	1.46122	0	4.72532	2.30372	1.40019	2.5937	2.9295	8.02661	0	3.60858	2.09847	2.06718	2.10653	0	1.13986	5.3817	0	2.89356	2.43265	4.05426	1.83464	2.02239
tRNA-Gly-GCC-1-5	114.284	59.1011	32.1911	29.6621	41.7344	30.6856	18.4656	14.1913	52.8355	30.9773	14.3311	19.5863	41.2211	11.4097	14.896	13.7121	35.7909	37.3196	40.3934	34.2231	19.172	13.3479	26.8986	12.9262	11.0624	3.94152	16.4314	15.3428	7.64024	20.4764	95.8925	4.90066	19.4528	20.5065	28.0931	9.55802	18.8161	8.39388	12.4031	22.0434	91.4575	48.3014	14.7997	28.939	44.5608	31.6244	38.5155	13.7199	13.213
tRNA-Ile-GAT-1-1	0.251016	0	0	1.34828	0	0	3.07759	0	2.29719	2.29462	1.31027	0.8705	0.981456	0	0	1.95887	0.650744	10.1781	0	2.63255	0.360037	0	0	0	0	1.31384	0	0	0	0	0.863897	2.10028	2.5937	0	0	0	0.773266	0	0	0.188083	0	0.569928	1.34543	1.52311	0	0	0	0.558369	0.269652
tRNA-Val-TAC-1-2	84.8793	83.5859	81.1776	122.693	100.163	109.591	70.7846	88.6955	73.5102	103.258	105.477	115.341	89.3125	86.714	90.5216	97.9433	104.77	134.011	93.2156	89.5066	101.26	80.0872	85.1788	92.9693	96.5446	78.8303	99.1752	97.9016	114.604	92.9314	94.7407	129.518	98.5607	120.109	96.3193	98.7662	90.2144	115.416	99.2246	89.7533	109.749	100.592	122.434	116.518	64.237	81.4936	83.1124	83.9947	98.8276
[truncated: 40 more columns]
