# Supplementary material for: Cell type–specific analysis by single-cell profiling identifies a stable mammalian tRNA–mRNA interface and increased translation efficiency in neurons
Source: HighWire-hosted journal article supplement (doi:10.1101/gr.275944.121), 2021-12-02
Supplement: Supplemental_Table_S13.xlsx [file Supplemental_Table_S13.xlsx]

## Sheet: anticodon_usage
# Table S13. Fetal human anticodon usage by cell type matrix
	Adrenal Adrenocortical cells	Adrenal Stromal cells	Adrenal Vascular endothelial cells	Adrenal Chromaffin cells	Adrenal Sympathoblasts	Adrenal Schwann cells	Cerebellum Purkinje neurons	Cerebellum Astrocytes	Cerebellum Granule neurons	Cerebrum Limbic system neurons	Cerebrum Excitatory neurons	Cerebrum Inhibitory neurons	Cerebrum SKOR2_NPSR1 positive cells	Cerebrum Astrocytes	Cerebrum Astrocytes Oligodendrocytes	Cerebrum Vascular endothelial cells	Eye Retinal progenitors and Muller glia	Eye Photoreceptor cells	Eye Ganglion cells	Eye Retinal pigment cells	Heart Cardiomyocytes	Heart Smooth muscle cells	Heart Lymphatic endothelial cells	Heart Stromal cells	Heart Lymphoid cells	Heart Vascular endothelial cells	Heart Cardiomyocytes Vascular endothelial cells	Heart Endocardial cells	Heart Myeloid cells	Heart Erythroblasts	Intestine Intestinal epithelial cells	Intestine Lymphoid cells	Intestine Smooth muscle cells	Intestine ENS glia	Intestine Chromaffin cells	Intestine Vascular endothelial cells	Intestine Stromal cells	Intestine Myeloid cells	Intestine ENS neurons	Liver Erythroblasts	Liver Hematopoietic stem cells	Liver Hepatoblasts	Liver Lymphoid cells	Liver Myeloid cells	Liver Vascular endothelial cells	Liver Stellate cells	Liver Megakaryocytes	Lung Stromal cells	Lung Bronchiolar and alveolar epithelial cells
AAC	435.213	456.047	503.224	470.764	577.386	447.055	540.715	446.76	539.745	448.693	386.74	448.054	479.863	406.191	376.824	428.735	409.5	415.36	405.429	405.205	408.15	391.052	506.899	441.627	440.56	447.255	416.534	412.528	458.329	500.335	421.677	523.103	398.169	386.222	446.468	378.197	384.367	416.029	374.386	640.7	462.308	406.165	493.806	421.727	511.669	417.51	538.98	405.227	425.566
AAG	491.346	492.062	497.406	435.222	480.453	470.099	496.446	389.575	488.917	416.558	340.062	364.488	423.467	390.705	392.574	406.8	443.354	425.659	382.905	466.519	493.173	431.976	502.373	390.121	428.695	489.143	486.554	446.342	446.774	467.294	537.322	414.521	528.289	466.438	516.101	451.182	446.537	466.457	449.264	522.977	574.157	540.259	435.053	494.299	492.194	452.303	613.608	418.36	466.885
AAT	653.327	691.663	603.577	591.473	686.963	659.061	613.443	729.112	607.516	566.519	487.657	524.508	533.291	603.33	578.069	618.177	583.977	509.76	608.144	661.124	636.59	727.539	642.675	700.688	662.903	651.289	610.437	664.253	693.271	638.793	679.465	641.224	638.891	656.578	614.406	653.55	678.963	682.876	653.096	736.741	648.722	589.269	538.571	614.447	629.701	683.424	719.331	661.639	588.283
ACG	591.972	599.673	651.573	697.429	602.673	654.452	762.061	614.741	762.42	755.756	706.832	799.207	701.491	662.889	686.566	685.977	650.382	686.546	659.627	685.116	677.229	693.435	610.994	639.493	692.308	733.714	716.964	618.417	716.38	706.448	684.073	670.57	668.819	748.677	655.366	676.773	628.402	630.347	667.656	887.403	630.081	680.678	650.481	699.921	601.964	669.756	762.865	699.772	653.289
AGA	533.627	549.339	545.401	435.893	514.169	534.623	569.174	589.723	568.79	476.067	403.587	438.719	445.234	478.852	487.071	458.647	531.894	482.299	489.089	557.157	441.161	525.192	461.64	462.536	454.489	464.821	447.355	487.67	469.884	420.093	442.992	441.667	497.06	508.031	348.163	484.357	491.681	363.5	451.344	391.222	492.134	401.997	436.452	449.143	539.997	485.853	559.71	517.096	442.255
AGC	790.36	674.741	548.31	763.148	556.314	668.279	885.382	836.334	825.35	858.11	926.746	1034.79	912.235	799.279	876.145	723.865	740.225	768.932	817.293	706.443	630.718	622.955	678.882	571.668	631.435	528.328	586.199	686.044	554.617	704.875	568.429	614.078	603.759	617.956	622.598	607.105	551.528	523.188	700.935	736.186	548.059	692.176	633.695	582.999	603.144	610.112	621.9	658.791	682.764
AGG	606.949	564.96	619.576	506.306	514.169	589.929	638.74	611.167	605.095	579.611	559.319	574.736	533.291	583.676	583.902	512.488	527.988	508.044	592.055	605.142	602.654	609.314	633.624	680.29	594.807	631.021	614.028	620.671	531.508	610.472	549.131	559.787	625.879	561.508	548.869	580.565	607.765	470.659	547.02	527.139	618.896	608.528	588.93	491.88	555.931	641.176	572.148	586.321	583.572
AGT	676.535	678.646	709.749	761.136	779.682	732.802	714.629	693.371	728.535	730.762	719.652	759.647	656.968	807.021	740.232	749.788	684.887	717.441	672.497	799.747	716.528	636.596	719.615	691.509	727.904	741.821	747.786	704.83	747.192	794.557	794.533	753.474	706.554	763.532	790.536	753.076	690.313	653.46	711.334	823.746	633.809	716.178	685.453	695.889	707.603	730.643	711.039	688.775	704.432
CAA	592.299	615.294	685.024	523.742	539.456	603.755	613.443	553.982	658.344	614.126	618.324	629.854	622.338	656.933	596.152	578.294	606.112	605.877	640.32	599.81	581.711	588.852	570.261	586.457	592.744	664.801	594.578	601.886	492.993	689.141	555.9	466.611	549.108	505.06	593.926	554.025	604.153	535.795	628.137	820.257	451.123	447.701	583.335	522.522	692.849	585.26	483.009	612.271	538.351
CAC	702.462	761.09	804.285	866.421	817.612	718.976	752.574	739.834	750.318	767.657	716.118	765.425	729.194	766.521	762.398	741.812	764.964	767.215	801.205	818.407	695.63	748.001	764.874	824.099	806.317	717.499	649.936	704.83	835.776	785.117	745.424	845.183	847.084	704.113	708.615	716.583	793.757	838.361	782.052	998.745	820.224	733.281	970.826	833.777	780.782	759.222	781.522	807.21	783.704
CAG	486.415	521.568	654.482	543.86	463.595	677.496	474.312	443.186	551.847	608.175	564.496	552.511	561.984	590.823	569.319	606.212	531.894	568.117	621.014	578.483	550.827	634.323	552.158	577.277	562.823	616.157	585.002	550.789	562.32	596.311	508.087	466.611	564.723	534.769	528.389	484.357	532.181	516.885	488.782	707.251	495.863	550.751	573.543	640.251	586.62	615.082	551.418	577.856	477.787
CAT	1131.73	1029.25	1018.08	1150.09	1129.49	1156.81	958.109	990.02	960.891	1019.97	938.252	1011.23	1095.28	1038.11	1024.89	1011.02	1077.46	1160.26	1116.54	999.683	1073.45	1043.56	1022.85	1018.9	1083.34	1003.96	1095.2	965.572	1143.9	1146.99	930.34	1107.83	1038.36	944.759	954.377	1078.19	994.97	1164.04	996.284	1194.44	1170.68	1193.2	1116.31	1120.04	893.503	1089.75	1080.03	1020.9	1003.08
CCA	429.375	443.463	494.497	517.036	476.238	474.708	395.26	396.723	493.758	487.968	492.917	491.17	468.98	465.749	499.904	520.465	429.682	411.928	447.259	431.863	484.805	486.542	443.537	434.998	490.6	460.767	467.403	482.41	458.329	437.4	419.949	430.662	409.879	386.222	454.66	514.215	422.03	443.344	482.542	342.388	439.938	433.76	422.463	447.53	497.505	397.629	437.403	415.195	427.585
CCC	294.3	340.191	341.785	358.103	295.015	331.835	306.721	350.26	338.853	390.375	396.766	406.716	357.177	373.433	390.24	388.853	317.704	394.764	305.681	365.218	385.634	345.581	371.122	372.273	399.806	345.913	383.019	391.489	373.596	383.905	375.304	430.662	377.349	407.019	438.276	328.434	381.53	376.107	393.106	436.329	294.535	406.739	408.474	470.915	357.637	406.327	418.746	401.904	360.964
CCG	307.391	304.176	301.062	317.867	337.16	267.311	252.966	314.519	292.866	289.21	277.851	306.704	280.992	302.558	281.16	342.988	317.053	372.451	308.898	303.904	360.344	318.298	353.019	293.738	310.043	352.669	361.175	344.149	288.863	331.983	274.781	275.858	296.675	270.356	307.203	328.434	326.067	401.321	326.548	385.078	260.98	446.982	237.81	375.764	311.015	295.736	296.439	297.947	335.931
CCT	540.227	578.845	541.038	717.547	602.673	709.758	607.119	657.63	597.834	680.775	669.687	750.757	591.667	789.749	670.233	670.024	629.549	707.142	595.273	554.491	637.191	647.964	656.253	658.871	624.728	614.806	651.731	640.208	516.102	616.765	589.311	517.234	649.301	620.927	606.214	603.788	635.109	617.74	619.817	656.832	644.994	632.674	544.166	561.227	587.8	550.467	632.265	627.777	593.936
CGA	265.98	287.687	328.695	325.914	341.374	327.226	265.614	339.537	314.65	289.21	332.337	313.816	310.674	324	331.325	358.941	343.746	231.709	283.157	303.904	321.092	368.316	212.716	347.794	312.106	324.293	315.093	326.867	377.447	311.529	337.716	352.159	383.855	344.629	352.259	364.927	344.899	367.702	299.509	358.957	331.818	274.513	279.777	308.03	342.883	385.203	364.848	351.666	367.694
CGC	406.349	335.418	325.786	314.514	307.658	368.705	306.721	343.112	380	366.571	350.581	365.377	344.314	363.904	390.824	321.053	356.115	367.302	344.293	346.557	292.797	286.468	253.449	297.308	293.535	231.059	283.973	287.793	242.645	295.796	281.55	289.798	270.651	288.181	339.971	272.036	277.828	285.757	259.991	303.425	298.263	309.438	317.547	266.905	298.621	314.375	290.22	300.241	299.323
CGG	333.898	334.55	353.42	335.302	244.441	304.182	306.721	314.519	317.07	314.204	346.636	333.818	361.134	341.867	344.741	315.071	300.126	344.989	302.463	327.896	389.379	347.854	402.804	366.153	391.036	386.45	366.562	399.003	415.962	413.799	369.544	382.973	359.132	359.484	327.683	354.974	351.606	401.321	303.669	444.693	354.188	382.881	374.901	406.406	394.817	352.895	319.242	308.944	314.397
CGT	364.285	348.435	267.61	309.819	295.015	354.879	202.373	307.371	254.14	274.928	221.393	271.144	308.696	253.72	268.327	221.347	311.845	307.229	341.075	351.889	386.929	356.949	316.812	320.256	342.027	281.054	381.822	337.387	342.784	339.85	296.096	330.149	339.614	303.036	307.203	328.434	345.415	344.59	328.628	306.318	335.546	420.393	306.356	320.125	300.982	305.677	236.322	337.9	306.86
CTC	524.127	550.206	635.574	523.742	531.027	493.144	518.581	589.723	624.458	595.083	582.658	680.526	586.72	581.293	557.653	550.377	565.748	496.03	559.878	493.177	546.712	497.909	547.632	539.54	531.87	504.006	550.59	541.772	454.478	590.018	570.157	458.541	510.072	490.205	516.101	530.802	533.729	495.873	621.897	849.748	521.961	465.954	622.504	512.039	578.948	591.473	611.535	567.096	520.182
CTG	483.079	513.324	584.67	366.821	480.453	479.317	597.633	575.427	532.484	566.519	493.492	449.832	509.546	503.867	490.571	458.647	437.494	478.866	469.783	479.848	429.972	520.645	515.951	474.265	433.338	522.923	442.268	481.659	481.438	445.267	500.022	451.204	443.711	472.38	425.988	507.58	499.678	489.569	522.061	409.455	376.557	436.203	418.266	485.429	564.194	447.332	402.162	436.003	421.663
CTT	515.787	499.438	429.049	346.032	455.166	442.447	496.446	500.371	452.611	333.247	324.201	318.705	348.272	416.911	385.574	456.653	414.057	314.095	444.041	485.18	442.455	497.909	525.002	508.943	466.354	510.762	409.352	483.913	385.15	476.734	393.018	379.305	415.084	421.874	430.084	411.372	437.508	384.512	374.386	426.975	484.678	391.936	421.064	395.923	389.506	415.025	489.228	468.598	430.95
GAA	755.078	752.846	696.659	730.288	720.679	686.714	752.574	772.001	663.184	629.598	653.744	680.526	607.497	690.882	683.066	652.077	700.512	638.488	624.232	629.134	673.669	652.511	696.986	643.573	660.84	626.967	646.944	635.699	720.231	627.779	763.426	742.469	793.735	698.171	684.039	673.456	731.072	769.023	707.174	825.49	782.941	739.173	755.398	769.268	748.914	762.95	806.398	707.288	720.583
GAT	0.253832	0	0	1.34121	0	0	3.16208	0	2.42038	2.38033	1.31488	0.888996	0.989409	0	0	1.99412	0.651033	10.2982	0	2.66582	0.369868	0	0	0	0	1.35122	0	0	0	0	0.864093	2.201	2.60241	0	0	0	0.773894	0	0	0.198187	0	0.574897	1.39888	1.61272	0	0	0	0.553805	0.269176
GCA	571.847	592.296	530.857	534.472	531.027	585.32	619.767	618.316	583.312	511.772	553.237	549.399	477.885	482.426	512.737	554.365	550.123	571.55	579.184	482.514	746.857	638.87	715.089	635.923	677.348	687.772	705.294	633.445	647.053	619.912	591.327	629.485	623.277	582.305	610.31	467.77	621.179	514.783	553.26	502.603	488.406	633.536	713.431	641.863	524.653	509.462	561.783	533.156	511.03
GCC	633.818	587.523	503.224	500.271	446.737	534.623	493.284	446.76	464.713	549.857	569.838	598.739	524.387	470.514	531.403	574.306	469.395	556.102	550.225	490.511	425.349	475.174	470.692	561.469	466.354	399.962	403.667	414.783	419.814	456.281	474.243	428.461	465.831	424.845	454.66	451.182	525.99	441.243	451.344	476.72	603.983	496.136	471.424	457.207	473.899	500.764	443.622	543.441	412.915
GCT	568.149	552.81	555.582	535.142	539.456	488.535	584.984	489.649	614.777	534.385	554.306	523.174	531.313	528.882	512.737	490.553	477.207	511.477	473.001	455.856	511.436	613.861	515.951	530.361	512.783	516.167	542.212	550.038	489.141	498.762	529.401	509.898	512.675	513.973	593.926	577.248	490.907	548.402	538.7	516.516	398.927	498.292	474.222	557.195	519.341	520.645	456.06	498.82	473.345
GTA	936.785	932.053	887.186	958.294	897.688	866.458	1097.24	904.242	963.312	1022.35	1116.34	1250.37	991.388	1278.73	1200.47	939.23	1175.12	1292.42	1071.49	989.02	994.252	998.092	868.969	815.94	980.168	818.841	968.022	891.181	1124.64	994.377	995.291	1027.87	956.385	1019.03	1081.35	836.014	912.679	1008.56	1033.72	994.9	995.453	965.252	1085.53	983.76	833.307	972.948	995.041	980.709	1058.4
GTC	1015.98	1103.88	1217.34	1099.79	990.407	1064.64	1141.51	1054.35	1193.25	1127.09	1201.8	1311.27	1051.74	1256.69	1244.22	1266.27	1147.77	1125.94	1058.62	1122.31	1087.04	1104.95	1117.89	1185.66	1267.51	1187.72	1083.23	1135.39	1132.34	1187.9	1149.82	1279.51	1111.23	1099.25	1040.39	1240.75	1174.26	1145.13	1098.2	1346.41	1088.66	1142.61	1300.96	1197.45	1246.42	1220.22	1181.61	1176.99	1223.13
GTG	676.499	727.245	731.565	908.669	758.609	677.496	875.895	757.705	760	737.903	739.704	824.544	769.76	758.183	703.483	781.694	866.525	882.212	765.81	805.078	887.73	816.208	864.444	863.876	922.39	797.221	935.405	824.305	824.222	803.998	890.015	882.6	795.036	822.951	880.649	875.824	885.593	884.587	819.49	622.348	708.375	766.194	821.145	804.748	688.717	780.346	727.623	866.863	811.026
GTT	835.47	840.931	804.285	1079	1011.48	949.417	828.464	843.482	820.509	784.32	800.435	803.208	874.638	840.97	897.728	869.436	910.796	1016.09	1084.36	930.372	923.608	770.736	828.237	700.688	759.888	716.148	921.94	907.713	1016.8	651.38	804.182	870.127	867.903	882.37	860.168	792.886	766.155	865.676	1004.6	741.498	786.669	874.705	843.527	1091.81	767.799	723.187	767.011	761.007	983.836
TAA	261.882	280.31	274.882	285.678	282.371	258.094	290.911	285.926	268.662	205.899	187.371	196.024	197.882	263.845	230.994	257.241	335.933	320.96	302.463	215.932	250.17	263.733	289.656	309.547	253.296	241.869	245.372	266.753	258.051	254.888	259.084	221.567	277.157	285.21	253.954	278.671	262.35	283.656	210.072	260.656	257.252	263.59	286.771	270.937	262.621	301.949	263.271	303.564	285.73
TAC	387.348	349.303	424.686	369.503	400.377	405.576	395.26	321.667	324.331	436.791	387.233	424.94	378.944	363.904	332.492	458.647	400.385	367.302	398.994	383.878	323.265	295.563	357.545	378.902	349.249	410.772	308.51	341.144	234.942	305.236	337.572	345.556	322.699	389.193	393.22	398.102	364.246	306.769	341.108	305.208	447.395	367.934	331.536	283.033	377.113	375.262	348.264	343.122	392.592
TAG	297.89	275.537	267.61	255.5	273.942	267.311	341.504	285.926	302.548	343.958	313.518	279.589	319.579	233.47	276.493	279.177	255.205	233.426	247.762	247.921	295.247	279.648	271.553	242.232	264.645	274.298	291.155	315.595	277.308	253.314	302.72	273.657	288.867	267.385	319.491	248.814	256.417	289.96	257.911	264.065	346.731	276.957	278.378	280.614	285.048	287.038	298.512	238.373	270.252
TAT	484.094	589.259	532.312	653.169	501.525	553.058	572.336	718.39	680.127	630.788	584.959	712.53	579.794	640.852	687.733	695.947	687.491	825.572	730.416	671.787	712.043	568.39	565.735	637.963	702.11	610.753	709.484	641.711	666.31	640.366	757.953	642.691	809.349	695.2	737.287	623.693	720.237	680.775	736.293	448.498	581.613	713.447	650.481	707.178	645.636	695.85	628.119	666.069	721.525
TCA	116.219	131.043	152.712	90.5316	155.936	133.656	85.3761	107.222	91.9745	76.1707	50.7052	58.6737	72.2269	102.441	109.081	109.677	158.852	152.756	128.708	119.962	162.28	134.14	117.673	132.08	168.692	168.903	168.169	165.312	130.951	111.71	163.17	184.884	161.349	136.663	176.13	119.431	132.852	151.283	133.115	109.994	123.034	164.852	127.298	159.659	136.917	134.2	99.5041	141.695	156.256
TCC	539.248	607.05	712.658	588.791	611.102	663.67	597.633	679.075	684.968	654.592	660.482	756.091	626.296	636.683	669.067	596.241	593.091	566.4	534.137	525.167	603.856	657.058	547.632	593.086	610.8	617.509	639.463	610.903	681.716	575.858	545.387	643.425	629.783	597.159	552.965	640.28	601.058	590.425	690.535	696.945	615.168	587.401	626.7	668.473	635.603	582.775	559.71	590.435	617.489
TCG	470.133	451.273	424.686	481.494	379.305	530.014	467.987	450.334	406.624	497.49	496.286	542.732	446.223	481.83	433.989	468.618	447.911	484.015	444.041	495.843	441.808	504.73	398.278	507.923	448.814	413.474	426.109	448.596	350.487	432.68	475.683	407.918	458.024	448.612	495.621	424.642	438.54	443.344	418.065	525.236	384.014	540.978	442.048	423.339	400.129	468.456	460.206	438.772	503.358
TCT	391.989	361.019	401.415	516.366	573.172	341.053	464.825	371.704	476.815	446.312	424.954	424.94	479.863	424.058	373.324	420.759	548.821	475.433	492.307	367.883	396.222	361.496	384.7	347.284	377.623	404.016	373.145	386.98	377.447	341.424	426.862	392.511	344.819	398.106	446.468	451.182	350.058	363.5	449.264	377.864	343.003	448.994	395.884	362.862	419.014	378.99	416.673	313.137	391.92
TGA	246.58	242.993	232.705	256.171	261.299	248.876	224.507	200.148	232.357	229.702	231.584	240.029	233.501	244.786	223.411	193.429	339.188	229.993	250.98	301.238	265.658	238.724	280.605	224.893	278.058	244.571	248.963	213.403	269.605	196.673	290.911	325.014	244.626	264.414	409.604	301.894	237.585	281.555	224.632	277.224	320.633	229.815	275.58	256.423	192.983	229.879	265.344	236.87	267.964
TGC	512.741	423.503	359.238	417.787	316.087	410.185	591.308	528.964	469.554	428.46	485.274	462.278	423.467	484.213	459.655	416.771	413.406	369.018	379.687	394.542	421.419	366.043	470.692	426.329	435.917	383.747	388.106	414.783	396.705	437.4	403.675	367.566	359.132	374.339	421.892	441.23	400.361	399.22	376.466	365.537	439.938	407.171	370.704	357.218	328.719	395.144	435.33	400.876	438.218
TGG	506.504	501.608	525.04	394.986	354.018	576.102	483.798	503.945	435.669	459.404	433.172	408.938	416.541	538.411	484.155	470.612	483.067	382.749	518.048	442.526	507.182	541.107	561.209	546.17	463.259	522.923	506.603	545.529	427.517	424.813	531.129	501.827	490.554	591.217	417.796	570.613	492.713	455.951	463.823	334.104	507.047	528.905	432.255	476.559	534.685	536.799	429.111	469.547	482.901
TGT	535.368	491.628	525.04	465.4	509.954	516.188	341.504	457.482	430.828	336.817	329.707	382.268	415.552	382.367	387.324	380.877	493.483	472	511.613	549.159	451.378	504.73	488.795	487.524	421.988	452.66	465.309	467.382	550.765	421.666	573.902	493.023	459.325	505.06	483.333	517.532	478.009	476.963	526.221	435.1	555.515	472.565	495.205	462.851	554.751	525.615	485.082	452.933	534.986
TTC	641.288	699.474	680.661	1060.9	893.473	760.455	683.009	725.538	820.509	734.333	757.291	814.32	729.194	760.565	734.982	761.753	881.499	1143.1	917.042	789.083	715.048	645.691	647.201	640.003	689.729	699.933	725.642	702.575	739.489	621.486	734.191	625.817	703.952	757.59	790.536	723.218	706.049	649.257	802.851	576.21	782.941	828.57	758.195	657.99	689.308	712.004	617.754	747.874	844.269
TTG	479.706	434.351	395.598	405.045	375.09	373.314	423.718	414.593	435.669	374.902	362.908	405.827	424.456	379.985	372.157	440.7	416.01	441.106	447.259	453.19	408.52	400.146	407.329	422.249	436.433	425.635	412.644	468.133	454.478	426.386	472.803	451.938	486.65	460.496	421.892	500.945	443.183	481.165	445.104	420.157	361.644	380.438	402.879	416.082	424.325	392.658	373.14	436.557	431.758
TTT	596.288	593.598	578.853	517.707	539.456	580.711	660.874	618.316	711.592	709.339	772.576	727.643	643.116	657.529	640.484	731.841	549.472	561.251	643.538	493.177	594.425	507.004	615.52	600.736	622.149	640.479	573.332	595.874	519.953	538.096	515.575	647.093	585.542	511.002	503.813	544.072	537.34	462.254	542.86	562.099	499.591	489.381	559.554	547.519	544.128	530.586	582.513	536.321	503.762
[truncated: 40 more columns]
