# Supplementary material for: Cell type–specific analysis by single-cell profiling identifies a stable mammalian tRNA–mRNA interface and increased translation efficiency in neurons
Source: HighWire-hosted journal article supplement (doi:10.1101/gr.275944.121), 2021-12-02
Supplement: Supplemental_Table_S14.xlsx [file Supplemental_Table_S14.xlsx]

## Sheet: AA_supply
# Table S14. Fetal human AA supply by cell type matrix
	Adrenal Adrenocortical cells	Adrenal Stromal cells	Adrenal Vascular endothelial cells	Adrenal Chromaffin cells	Adrenal Sympathoblasts	Adrenal Schwann cells	Cerebellum Purkinje neurons	Cerebellum Astrocytes	Cerebellum Granule neurons	Cerebrum Limbic system neurons	Cerebrum Excitatory neurons	Cerebrum Inhibitory neurons	Cerebrum SKOR2_NPSR1 positive cells	Cerebrum Astrocytes	Cerebrum Astrocytes Oligodendrocytes	Cerebrum Vascular endothelial cells	Eye Retinal progenitors and Muller glia	Eye Photoreceptor cells	Eye Ganglion cells	Eye Retinal pigment cells	Heart Cardiomyocytes	Heart Smooth muscle cells	Heart Lymphatic endothelial cells	Heart Stromal cells	Heart Lymphoid cells	Heart Vascular endothelial cells	Heart Cardiomyocytes Vascular endothelial cells	Heart Endocardial cells	Heart Myeloid cells	Heart Erythroblasts	Intestine Intestinal epithelial cells	Intestine Lymphoid cells	Intestine Smooth muscle cells	Intestine ENS glia	Intestine Chromaffin cells	Intestine Vascular endothelial cells	Intestine Stromal cells	Intestine Myeloid cells	Intestine ENS neurons	Liver Erythroblasts	Liver Hematopoietic stem cells	Liver Hepatoblasts	Liver Lymphoid cells	Liver Myeloid cells	Liver Vascular endothelial cells	Liver Stellate cells	Liver Megakaryocytes	Lung Stromal cells	Lung Bronchiolar and alveolar epithelial cells
*	118.365	131.254	152.604	92.7166	162.574	133.115	82.7022	108.557	91.9491	77.457	53.573	60.0221	72.8329	103.116	111.141	110.468	157.866	150.68	127.41	121.702	160.183	133.496	117.534	133.142	168.085	170.496	164.32	164.965	129.867	112.301	162.33	180.802	161.976	136.271	171.822	121.936	135.204	151.414	131.043	108.504	126.961	163.134	126.472	157.954	138.221	134.614	100.72	144.383	153.97
A	1741.02	1435.97	1232.46	1531.54	1230.29	1441.31	1727.56	1729.67	1674.44	1681.06	1862.29	1905.25	1694.11	1658.25	1759.23	1472.24	1500.38	1484.79	1525.73	1468.54	1327.56	1269.34	1401.37	1305.72	1355.99	1153.91	1229.48	1385.7	1184.08	1445.68	1247.21	1243.38	1238.33	1276.8	1350.6	1348.07	1251.49	1209.21	1316.57	1386.11	1327.32	1394.1	1313.37	1194.23	1242.2	1323.71	1363.92	1385.7	1399.52
C	582.409	593.251	530.481	547.372	553.63	582.95	600.357	626.012	583.151	520.414	584.527	562.025	481.894	485.606	522.421	558.366	546.71	563.779	573.345	489.514	737.209	635.803	714.247	641.035	674.91	694.258	689.15	632.115	641.697	623.194	588.286	615.589	625.698	580.631	595.385	477.584	632.178	515.229	544.647	495.794	503.997	626.933	708.801	635.007	529.648	511.036	568.65	543.269	503.551
D	1034.74	1105.66	1216.47	1126.34	1032.56	1060.33	1105.76	1067.48	1192.92	1146.12	1269.77	1341.4	1060.57	1264.97	1267.72	1275.4	1140.65	1110.63	1047.95	1138.59	1073	1099.65	1116.58	1195.19	1262.95	1198.93	1058.43	1133.01	1122.97	1194.19	1143.9	1251.27	1115.55	1096.09	1014.95	1266.78	1195.05	1146.12	1081.1	1328.17	1123.41	1130.7	1292.52	1184.65	1258.29	1223.99	1196.05	1199.32	1205.23
E	1186.94	1251.69	1315.3	1622.88	1485.13	1248.52	1163.96	1331.63	1444.57	1351.87	1415.73	1529.2	1326.95	1350.7	1317.05	1321.6	1438.27	1616.84	1462.03	1300.86	1245.46	1138.11	1193.43	1189.03	1217.2	1215.29	1247.02	1241.73	1184.08	1217.92	1297.64	1060.42	1218.74	1244.21	1274.68	1280.33	1261.73	1146.12	1402.57	1406.64	1346.56	1281.03	1371.74	1157.53	1280.33	1307.5	1244.32	1339.91	1344.48
F	769.023	754.059	696.165	747.914	751.355	683.933	729.005	781.61	663.002	640.23	690.718	696.165	612.594	695.436	695.967	656.783	696.165	629.807	617.938	638.261	664.967	649.379	696.165	648.746	658.462	632.88	632.135	634.364	714.27	631.103	759.499	726.08	796.818	696.165	667.31	687.585	744.017	769.689	696.165	814.307	807.934	731.47	750.496	761.051	756.045	765.307	816.254	720.704	710.037
G	1494.47	1537.24	1556.56	1482.09	1410.44	1523.93	1353.87	1494.47	1488.12	1621.76	1719.11	1802.03	1520.51	1490.39	1620.75	1570.66	1371.63	1496.64	1376.03	1400.93	1396.56	1470.72	1387.81	1539.1	1471.64	1376.24	1393.5	1414.2	1462.92	1423.54	1387.76	1469.38	1478.69	1424.92	1410.54	1449.69	1535.29	1408.99	1511.09	1588.18	1562.01	1474.74	1496.82	1579.54	1481.11	1494.47	1439.46	1564.91	1371.01
H	688.993	728.416	731.046	930.6	790.9	674.753	848.464	767.136	759.79	750.364	781.54	843.492	776.219	763.181	716.768	787.337	861.149	870.217	758.089	816.758	876.263	812.29	863.426	870.821	919.071	804.739	913.994	822.574	817.4	808.254	885.437	863.117	798.124	820.586	859.112	894.199	901.274	885.352	806.733	613.917	730.988	758.208	815.816	796.151	695.275	782.757	736.517	883.306	799.156
I	1158.69	1282.99	1135.08	1276.06	1239.08	1207.21	1151.71	1465.52	1289.71	1219.95	1134.67	1266.37	1123.42	1252.38	1289.71	1325.62	1264.23	1327.34	1325.06	1354.95	1331.58	1289.71	1206.99	1349.41	1360.1	1275.31	1289.71	1303.22	1348.33	1285.93	1430.88	1257.73	1456.48	1347.89	1318.64	1304.04	1424.76	1364.83	1367.76	1169.38	1269.61	1289.71	1182.73	1309.1	1287.48	1383.54	1363.92	1353.46	1290.9
K	1132.61	1094.8	1007.19	884.585	1036.96	1019.01	1121.07	1132.61	1163.88	1060.19	1158.81	1070.39	999.706	1081.52	1045.44	1197.07	957.551	863.445	1076.61	992.551	1023.49	1000.09	1139.18	1118.6	1084.59	1162.1	960.19	1077.52	897.612	1020.2	903.92	1003.74	1004.51	930.195	911.058	975.49	992.11	847.499	902.967	975.675	1015.69	872.131	974.254	933.364	942.524	948.532	1084.84	1023.98	921.032
L	2169.17	2188.29	2377.72	2093.34	2126.64	2267.54	2147.2	1982.97	2269.69	2225.68	2138.23	2068.94	2143.08	2149.86	2104.54	2143.08	2159.02	2124.75	2172.34	2139.26	2143.08	2187.98	2183.43	2122.56	2094.64	2307.83	2152.24	2176.78	2020.58	2272.92	2151.98	1802.29	2216.72	2052.95	2157.77	2059.37	2138.85	2094.56	2002.5	2540.32	2192.96	2057.59	2143.08	2185.03	2341.42	2248.56	2236.83	2191.21	2009.16
M	1152.63	1030.91	1017.36	1177.84	1177.56	1152.13	928.103	1002.34	960.626	1037.2	991.317	1034.47	1104.47	1044.95	1044.25	1018.32	1070.77	1144.49	1105.28	1014.19	1059.58	1038.55	1021.64	1027.1	1079.45	1013.43	1070.13	963.544	1134.43	1153.07	925.554	1083.38	1042.39	942.045	931.038	1100.81	1012.59	1165.05	980.774	1178.25	1208.05	1180.76	1109.07	1108.07	902.011	1093.12	1093.23	1040.26	988.402
N	850.9	842.286	803.715	1105.04	1054.53	945.572	802.518	853.981	820.283	797.565	845.706	821.666	881.976	846.513	914.682	875.711	905.144	1002.27	1073.43	943.87	911.677	767.037	827.261	706.321	757.154	722.901	900.836	905.806	1008.38	654.828	800.045	850.92	871.275	879.834	839.133	809.521	779.721	866.426	988.964	731.453	811.781	865.589	838.053	1080.15	775.11	725.421	776.385	775.442	969.438
P	1474.08	1403.37	1496.97	1266.44	1159.99	1464.26	1384.5	1447.43	1357.46	1376.07	1414.86	1347.77	1321.97	1473.6	1439.48	1307.54	1303.05	1218.98	1398.32	1395.52	1479.85	1491.08	1595.76	1605.42	1443.89	1554.92	1453.15	1561.92	1363.61	1456.76	1442.35	1412.7	1481.3	1507.86	1262.69	1537.75	1477.79	1329.08	1294.05	1288.24	1527.38	1504.47	1387.03	1360.16	1499.58	1535.6	1336.64	1390.7	1360.66
Q	980.566	949.201	979.573	790.495	891.959	849.179	989.364	1002.34	967.886	957.32	904.836	875.322	941.839	889.678	879.022	905.839	848.209	907.464	907.796	946.574	827.66	916.371	922.193	903.721	866.641	957.503	835.342	947.797	928.169	876.268	967.82	883.206	933.975	930.195	827.145	1029.68	959.556	971.574	952.108	818.374	761.766	808.13	815.816	891.881	997.931	842.585	784.779	889.11	840.931
R	2344.22	2298.68	2318.13	2796.61	2601.18	2492.45	2474.94	2438.91	2535.86	2714.62	2721.28	2889.24	2521.21	2678.63	2491.45	2607.05	2577.62	2688.53	2474.94	2442.16	2480.33	2513.8	2400.41	2466.98	2444.69	2542.43	2471.23	2433.23	2230.66	2442.16	2438.1	2214.11	2427.03	2479.53	2449.47	2536.95	2420.29	2458.38	2442.72	2794.04	2335.31	2721.64	2255.66	2397.23	2342.01	2370.71	2599.84	2422.5	2442.16
S	1644.15	1635.46	1661.2	1590.61	1726.8	1592.78	1592.78	1639.21	1730.1	1555.19	1607.88	1550.57	1533.48	1586.91	1583.9	1512.41	1681.54	1435.69	1481.14	1641.63	1519.46	1737.71	1469.18	1578.17	1551.83	1564.47	1518.06	1574.66	1592.78	1434.61	1592.78	1592.78	1644.58	1626.36	1662.28	1764.69	1592.78	1562.51	1490.61	1523	1592.78	1389.98	1456.52	1554.01	1610.39	1626.59	1666.08	1634.89	1528.56
T	1605.3	1521.16	1501.33	1573.44	1652.1	1597.37	1219.09	1476.37	1413.11	1365.18	1342.62	1445.53	1392.8	1452.62	1422.24	1361.77	1480.97	1476.32	1509.81	1725.47	1534.75	1491.08	1523.43	1511.34	1486.55	1489.45	1558.41	1506.43	1627.16	1564.31	1655.97	1541.84	1511.34	1567.11	1542.41	1632.59	1540.54	1476.29	1541.8	1543.96	1573.55	1592.37	1477.36	1463.07	1578.22	1566.76	1449.95	1507.67	1523.65
V	1553.19	1568.96	1730.97	1747.88	1871.8	1565.24	1635.67	1527.03	1613.95	1681.06	1574.37	1676.07	1601.33	1546.75	1499.51	1640.95	1565.08	1528.81	1589.44	1630.81	1408.61	1427.73	1627.4	1657.85	1590.38	1590.38	1343.51	1455.44	1516.39	1599.11	1496.93	1676.01	1574.04	1475.28	1510.44	1524.2	1569.68	1562.51	1474.23	1918.31	1785.15	1491.67	1784.51	1522.1	1685.46	1556.79	1689.16	1585.07	1578.42
W	437.305	444.178	494.146	529.515	496.509	472.786	382.881	401.661	493.622	496.209	520.795	502.458	472.915	468.82	509.345	524.222	427.016	406.327	442.75	438.129	478.542	484.206	443.014	438.495	488.835	465.112	456.704	481.397	454.535	439.716	417.789	421.155	411.472	385.113	443.542	525.003	429.503	443.728	475.03	337.75	453.982	429.239	419.722	442.75	502.242	398.857	442.75	423.071	421.327
Y	954.087	933.555	886.557	981.423	935.898	862.949	1062.88	915.497	963.046	1039.62	1179.47	1279.11	999.706	1287.16	1223.14	946.009	1167.82	1274.85	1060.69	1003.37	981.409	993.301	867.946	822.499	976.641	826.563	945.864	889.309	1115.33	999.641	990.171	1005.18	960.101	1016.1	1054.91	853.554	928.84	1009.43	1017.63	981.423	1027.23	955.191	1078.49	973.251	841.241	975.953	1007.2	999.312	1042.91
[truncated: 40 more columns]
