# Supplementary material for: Cell type–specific analysis by single-cell profiling identifies a stable mammalian tRNA–mRNA interface and increased translation efficiency in neurons
Source: HighWire-hosted journal article supplement (doi:10.1101/gr.275944.121), 2021-12-02
Supplement: Supplemental_Table_S15.xlsx [file Supplemental_Table_S15.xlsx]

## Sheet: translation_efficiency
# Table S15. Fetal human translation efficiency across cell types
Cell type	Translation efficiency	P-value	-log10(P-value)
Adrenal-Adrenocortical cells	0.803008	5.97902e-05	4.22337
Adrenal-Chromaffin cells	0.715789	0.00482973	2.31608
Adrenal-Schwann cells	0.77594	0.000258004	3.58837
Adrenal-Stromal cells	0.819549	7.38192e-05	4.13183
Adrenal-Sympathoblasts	0.733835	0.000931779	3.03069
Adrenal-Vascular endothelial cells	0.810526	0.000218279	3.66099
Kidney-Mesangial cells	0.806015	9.25384e-05	4.03368
Kidney-Metanephric cells	0.78797	0.000249514	3.60291
Kidney-Myeloid cells	0.706767	0.00417063	2.3798
Kidney-Ureteric bud cells	0.757895	0.000781823	3.10689
Kidney-Vascular endothelial cells	0.778947	0.000552544	3.25763
Liver-Erythroblasts	0.736842	0.00319294	2.49581
Liver-Hematopoietic stem cells	0.723308	0.00419808	2.37695
Liver-Hepatoblasts	0.678195	0.0144631	1.83974
Liver-Lymphoid cells	0.71982	0.00615998	2.21042
Liver-Megakaryocytes	0.721324	0.00372672	2.42867
Liver-Myeloid cells	0.693233	0.00830891	2.08046
Liver-Stellate cells	0.73985	0.00157456	2.80284
Liver-Vascular endothelial cells	0.756391	0.00114963	2.93944
Cerebellum-Astrocytes	0.82437	3.69361e-05	4.43255
Cerebellum-Granule neurons	0.863158	1.3626e-05	4.86563
Cerebellum-Purkinje neurons	0.837594	2.41942e-05	4.61629
Muscle-Satellite cells	0.774436	0.000444449	3.35218
Muscle-Schwann cells	0.750376	0.00105838	2.97536
Muscle-Skeletal muscle cells	0.6	0.0165295	1.78174
Muscle-Smooth muscle cells	0.79082	0.000207687	3.68259
Muscle-Stromal cells	0.766917	0.0012455	2.90466
Muscle-Vascular endothelial cells	0.795489	9.05488e-05	4.04312
Cerebrum-Astrocytes	0.815038	0.000210049	3.67768
Cerebrum-Excitatory neurons	0.834586	9.74062e-05	4.01141
Cerebrum-Inhibitory neurons	0.818045	0.000246554	3.60809
Cerebrum-Limbic system neurons	0.821361	0.000107641	3.96802
Cerebrum-SKOR2_NPSR1 positive cells	0.792027	0.000191402	3.71805
Cerebrum-Vascular endothelial cells	0.790977	0.00057278	3.24201
Pancreas-Acinar cells	0.801504	0.000631509	3.19962
Pancreas-Ductal cells	0.81203	0.000177959	3.74968
Pancreas-Islet endocrine cells	0.801504	0.000436079	3.36043
Pancreas-Stromal cells	0.806318	0.000613517	3.21217
Placenta-Extravillous trophoblasts	0.810526	2.05006e-05	4.68823
Placenta-IGFBP1_DKK1 positive cells	0.811583	7.06425e-05	4.15093
Placenta-Lymphoid cells	0.760436	0.000575227	3.24016
Placenta-Myeloid cells	0.708271	0.00356428	2.44803
Placenta-PAEP_MECOM positive cells	0.771429	0.000550367	3.25935
Placenta-Smooth muscle cells	0.83609	2.56802e-05	4.5904
Placenta-Stromal cells	0.81203	6.62824e-05	4.1786
Placenta-Syncytiotrophoblasts and villous cytotrophoblasts	0.790977	9.15221e-06	5.03847
Placenta-Trophoblast giant cells	0.796992	1.98817e-05	4.70155
Placenta-Vascular endothelial cells	0.834586	6.13553e-05	4.21215
Lung-Bronchiolar and alveolar epithelial cells	0.730827	0.00396	2.4023
Lung-Ciliated epithelial cells	0.726316	0.00570312	2.24389
Lung-Lymphatic endothelial cells	0.786466	0.000379384	3.42092
Lung-Lymphoid cells	0.709289	0.00781129	2.10728
Lung-Myeloid cells	0.696241	0.00667787	2.17536
Lung-Stromal cells	0.778947	0.000538832	3.26855
Lung-Vascular endothelial cells	0.786466	0.000514057	3.28899
Spleen-Stromal cells	0.777444	0.00070538	3.15158
Eye-Ganglion cells	0.771429	0.000528968	3.27657
Eye-Photoreceptor cells	0.679699	0.00820809	2.08576
Eye-Retinal pigment cells	0.744361	0.00152278	2.81736
Eye-Retinal progenitors and Muller glia	0.765414	0.00067023	3.17378
Stomach-Goblet cells	0.777444	0.000283065	3.54811
Stomach-Parietal and chief cells	0.794284	0.000670514	3.17359
Stomach-Stromal cells	0.822556	0.000221647	3.65434
Stomach-Vascular endothelial cells	0.806015	0.000179313	3.74639
Heart-Cardiomyocytes	0.675188	0.00350249	2.45562
Heart-Endocardial cells	0.813534	0.000213517	3.67057
Heart-Erythroblasts	0.726316	0.00334418	2.47571
Heart-Lymphatic endothelial cells	0.759398	0.00112896	2.94732
Heart-Lymphoid cells	0.718797	0.00356013	2.44853
Heart-Myeloid cells	0.677698	0.0104994	1.97884
Heart-Smooth muscle cells	0.767206	0.000381694	3.41828
Heart-Stromal cells	0.786466	0.0019661	2.70639
Heart-Vascular endothelial cells	0.756391	0.00120891	2.9176
Thymus-Thymic epithelial cells	0.750376	0.00233888	2.63099
Thymus-Thymocytes	0.687218	0.00937012	2.02825
Thymus-Vascular endothelial cells	0.73035	0.00288564	2.53976
Intestine-Chromaffin cells	0.726316	0.00227729	2.64258
Intestine-ENS glia	0.716811	0.00251857	2.59885
Intestine-ENS neurons	0.705263	0.00294298	2.53121
Intestine-Intestinal epithelial cells	0.705263	0.00596852	2.22413
Intestine-Lymphoid cells	0.66015	0.0218519	1.66051
Intestine-Myeloid cells	0.629045	0.0335337	1.47452
Intestine-Smooth muscle cells	0.76391	0.000864609	3.06318
Intestine-Stromal cells	0.783459	0.000390806	3.40804
Intestine-Vascular endothelial cells	0.774436	0.000592317	3.22745
